# Supplementary material
Source: PubMed Central journal article supplement (PMC4492284)
Supplement: NIHMS699545-supplement-supplemental.pdf [file NIHMS699545-supplement-supplemental.pdf]

## **SUPPLEMENTARY APPENDIX**

### **MICROARRAY EXPRESSION PROFILING ASSOCIATES PROGRESSIVE CHRONIC DAMAGE OF RENAL ALLOGRAFTS WITH INNATE AND ADAPTIVE IMMUNITY**

Maarten Naesens, Purvesh Khatri, Li Li, Tara Sigdel, Rong Chen, Oscar Salvatierra, Atul Butte, Minnie Sarwal

#### **SUPPLEMENTAL METHODS**

##### *Histological Evaluation*

All slides (n=120) were stained with hematoxylin and eosin and with the periodic acid-Schiff method. The revised Banff criteria (31) were used to semi-quantitatively score the severity of acute histological lesions (interstitial inflammation, tubulitis, intimal arteritis, glomerulitis, inflammation in atrophic areas) and of chronic histological lesions (tubular atrophy [TA], interstitial fibrosis [IF], vascular intimal thickening, arteriolar hyalinosis, increase in mesangial matrix, transplant glomerulopathy). The number of globally sclerosed glomeruli was counted and classified into 4 groups (0% = 0; <25% = 1; 26–50% = 2; >50% = 3). Besides the established Banff scores, we also assessed the recently proposed “total i-score” (31), representing all interstitial inflammation, including infiltrates in areas of unscarred tubulo-interstitium, in areas of interstitial fibrosis and tubular atrophy (IFTA), nodular infiltrates, perivascular infiltrates and subcapsular infiltrates. The CADI score was calculated in all biopsies (score range 0–18) (1), as

the addition of the histological scores for interstitial inflammation in non-fibrotic areas (score 0-3), interstitial fibrosis (score 0-3), tubular atrophy (score 0-3), mesangial matrix increase (score 0-3), glomerulosclerosis (score 0-3) and vascular intimal proliferation (score 0-3). This CADI score, obtained in early protocol biopsies, correlates significantly with graft survival and was used as surrogate end-point for transplantation outcome (1). For implantation biopsies, we calculated the “Remuzzi score” as the addition of the scores for glomerulosclerosis, interstitial fibrosis, tubular atrophy and vascular intimal thickening (score range 0-12) (27).

For inclusion in the study, patients needed to have a clear histological evolution, i.e. either absence of progression of chronic histological damage or clear progression of histological damage. All pathology analyses were performed by a single pathologist. In the longitudinal cohort, patients were categorized into a *progressor* group when the histological CADI score obtained reached at least 6 within the first 2 years after transplantation. All other patients were categorized as *non-progressors*.

#### *RNA Extraction, Quality Control, Amplification and Hybridization*

For each kidney allograft biopsy (n=120), a separate biopsy core was placed in RNAlater<sup>®</sup> (Ambion Inc, Austin, TX, USA) and stored at -20°C until RNA extraction. Total RNA was extracted from each biopsy using TRIzol<sup>®</sup> Reagent (Invitrogen, Carlsbad, CA, USA). RNA integrity was ensured using the RNA 6000 Nano LabChip<sup>®</sup> Kit (Agilent Technologies, Waldbronn, Germany) on a 2100 Bioanalyzer (Agilent Technologies, Waldbronn, Germany). RNA was

amplified to cDNA and biotin labeled using the Ovation™ Biotin System (NuGEN Technologies, San Carlos, CA, USA). The cDNA fragments of all 120 biopsies were hybridized onto Affymetrix GeneChip® Human Genome U133 Plus 2.0 Arrays comprising more than 54,000 probe sets, covering more than 47,000 transcripts and variants, including 38,500 well-characterized human genes (Affymetrix Inc., Santa Clara, CA, USA). The microarrays were scanned using GeneChip Scanner 3000 (Affymetrix Inc., Santa Clara, CA, USA). For processing and normalization of the scanned images, dChip 2006 software was used, with perfect match [PM]/mismatch [MM] difference modeling and invariant set normalization (49).

**SUPPLEMENTAL FIGURE 1**

Distribution of the different components of the CADI score in the different biopsy groups included in the discovery set and the validation set of Project 1.

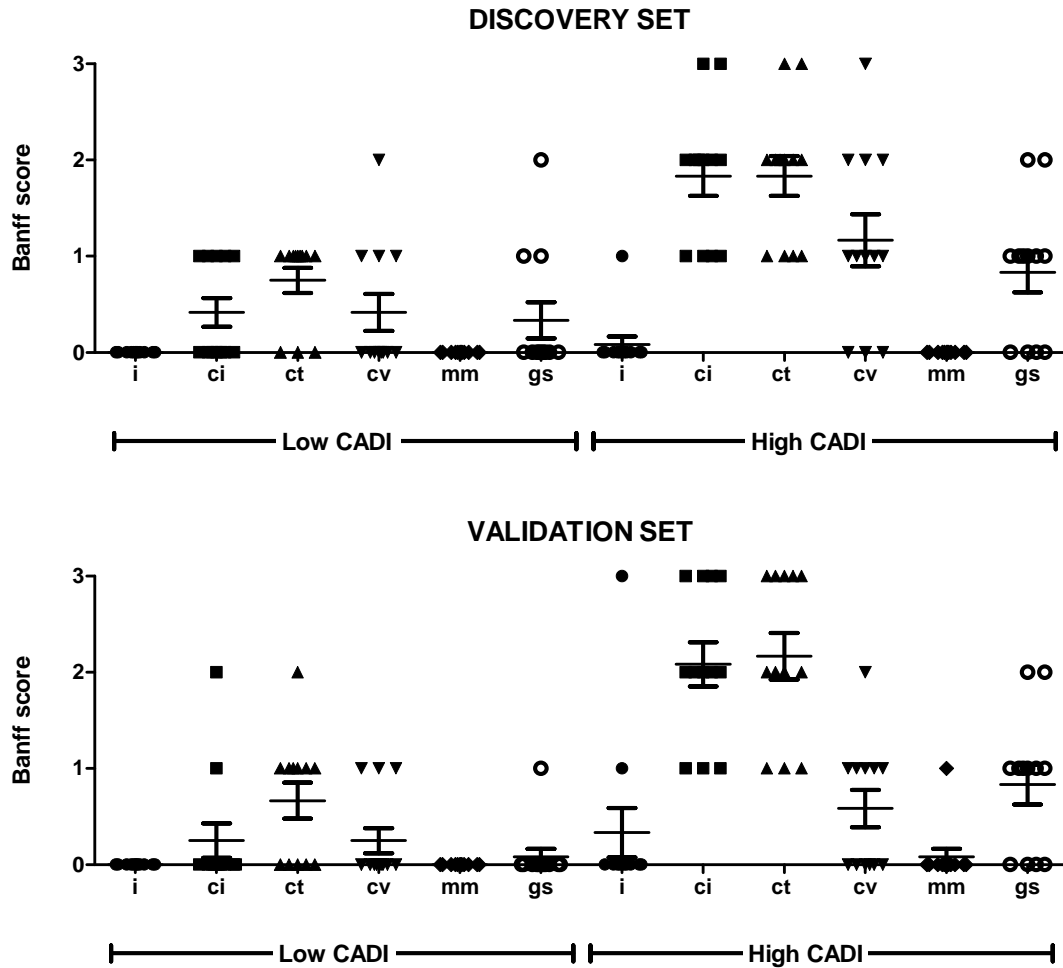

[i]=interstitial inflammation; [ci]=interstitial fibrosis; [ct]=tubular atrophy; [cv]=vascular intimal thickening; [mm]=increase in mesangial matrix; [gs]=globally sclerosed glomeruli.

**SUPPLEMENTAL FIGURE 2**

Distribution of the different components of the CADI score in the different biopsy groups included in Project 2-3.

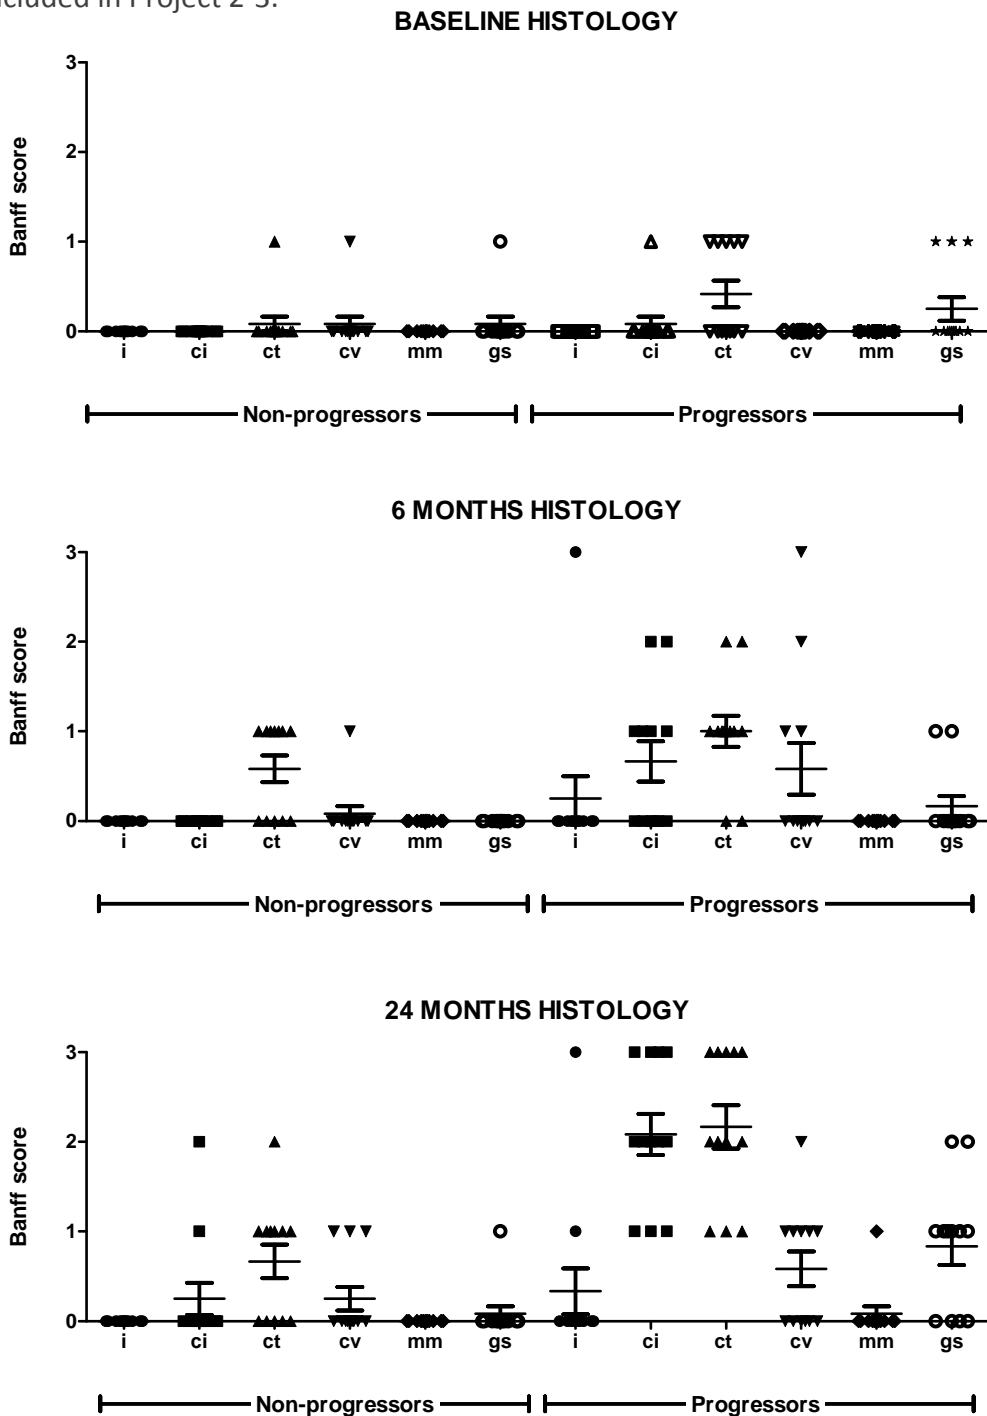

[i]=interstitial inflammation; [ci]=interstitial fibrosis; [ct]=tubular atrophy; [cv]=vascular intimal thickening; [mm]=increase in mesangial matrix; [gs]=globally sclerosed glomeruli.

**SUPPLEMENTAL FIGURE 3**

Distribution of the different components of the CADI score in the different biopsy groups included in Project 4.

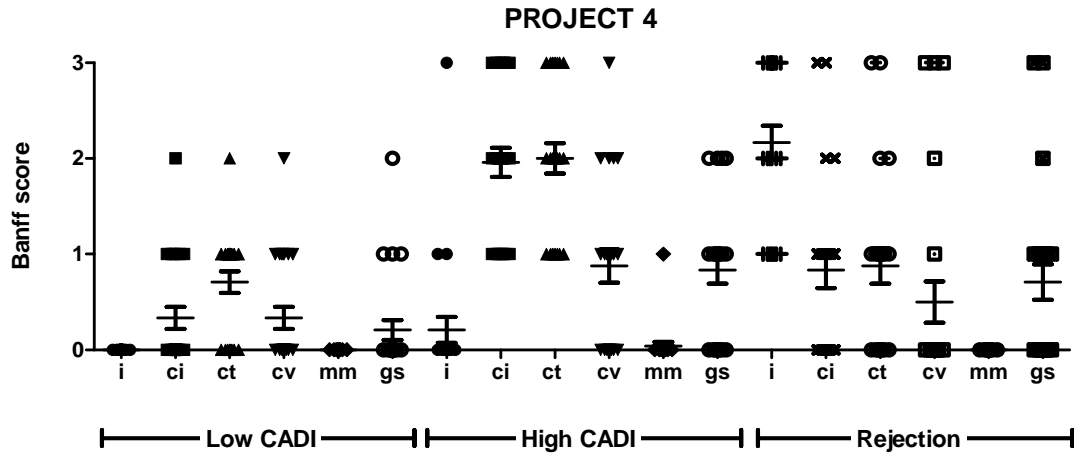

[i]=interstitial inflammation; [ci]=interstitial fibrosis; [ct]=tubular atrophy; [cv]=vascular intimal thickening; [mm]=increase in mesangial matrix; [gs]=globally sclerosed glomeruli.

## **SUPPLEMENTAL TABLES**

### **SUPPLEMENTAL TABLE 1**

Details of the IPA® enrichment analysis (biological functions) of the 397 upregulated probesets in the discovery set of Project 1.

### **SUPPLEMENTAL TABLE 2**

Details of the IPA® enrichment analysis (biological functions) of the 703 upregulated probesets in the validation set of Project 1.

### **SUPPLEMENTAL TABLE 3**

Details of the IPA® enrichment analysis (biological functions) of the 601 upregulated probesets in Project 2.

### **SUPPLEMENTAL TABLE 4**

Details of the IPA® enrichment analysis (biological functions) of the 92 upregulated probesets in Project 3.

### **SUPPLEMENTAL TABLE 5**

Probesets (and their corresponding genes on Affymetrix GeneChip Human Genome U133 Plus 2.0 Arrays) included in the IPKB lists, that were used to calculate the different immune geneset scores.

**SUPPLEMENTAL TABLE 1**

© 2000-2010 Ingenuity Systems, Inc. All rights reserved.

**397 probeset list enrichment analysis (biological functions)**

| Category              | Function              | Function Annotation                    | p-value  | Molecules                                                                                                                                                                                                                                                                                                                                                                                                                                                                                                                                                                                       | # Molecules |
|-----------------------|-----------------------|----------------------------------------|----------|-------------------------------------------------------------------------------------------------------------------------------------------------------------------------------------------------------------------------------------------------------------------------------------------------------------------------------------------------------------------------------------------------------------------------------------------------------------------------------------------------------------------------------------------------------------------------------------------------|-------------|
| Inflammatory Response | immune response       | immune response                        | 7,99E-43 | AHR, ANXA1, APOL1, ARHGDI1B, CASP1, CCL5, CCR2, CCR5, CCR7, CD2, CD28, CD44, CD47, CD48, CD74, CD84, CD96, CD209, CD247, CD1C, CD300A, CD8A, CIITA, CLEC7A, CSF1R, CST7, CTSS, CXCL9, CYBB, DEF6, ETS1, FCGR2A, FCGR2B, FLI1, FYB, GBP2, GFI1, GPR65, GZMA, GZMB, HCK, HLA-B, HLA-C, HLA-DMB, HLA-DOA, HLA-DQB1, HLA-DRA, HLA-DRB1, HLA-DRB4, IL7, IL10RA, IL2RB, IL2RG, IL7R, IRF8, ITGAL, ITGAM, ITGAX, ITGB2, ITGB6, ITK, JAK3, KLRK1, LCK, LCP2, LTB4R, MMP7, NCF4, NFATC2, NLRP3, NOD2, P2RY14, PRF1, PTPRC, RNASE6, SELL, SELPLG, SIRPG, SIT1, STAT4, TAP1, TBX21, TNFSF13B, TRIM22, VAV1 | 85          |
| Inflammatory Response | immune response       | immune response of T lymphocytes       | 2,45E-06 | CASP1, CD28, CD8A, HLA-DQB1, IL7R, ITK, NFATC2, PTPRC                                                                                                                                                                                                                                                                                                                                                                                                                                                                                                                                           | 8           |
| Inflammatory Response | activation            | activation of leukocytes               | 2,13E-26 | ANXA1, CCL5, CCR2, CD2, CD28, CD44, CD47, CD48, CD74, CD209, CD247, CD1C, CD300A, CD8A, CLEC7A, CSF1R, CXCL9, DEF6, FCGR2A, FCGR2B, FYB, GFI1, GZMA, GZMB, HCK, HLA-C, HLA-DMB, HLA-DOA, HLA-DQB1, HLA-DRA, HLA-DRB1, IL7, IL2RB, ITGAL, ITGAM, ITGB2, ITGB6, ITK, JAK3, KLRK1, LCK, LCP2, NFATC2, PRF1, PTPRC, SELL, SIRPG, SIT1, STAT4, TBX21, TNFSF13B, VAV1                                                                                                                                                                                                                                 | 52          |
| Inflammatory Response | activation            | activation of lymphocytes              | 1,59E-19 | CCL5, CCR2, CD2, CD28, CD44, CD47, CD48, CD209, CD247, CD1C, CD8A, CLEC7A, DEF6, FCGR2A, FCGR2B, GFI1, GZMA, GZMB, HLA-DRA, HLA-DRB1, IL7, IL2RB, ITGAL, ITGB2, ITK, JAK3, KLRK1, LCK, NFATC2, PRF1, PTPRC, SIRPG, SIT1, STAT4, TBX21, TNFSF13B, VAV1                                                                                                                                                                                                                                                                                                                                           | 37          |
| Inflammatory Response | activation            | activation of T lymphocytes            | 7,00E-19 | CCL5, CCR2, CD2, CD28, CD44, CD47, CD48, CD209, CD247, CD8A, CLEC7A, DEF6, GFI1, GZMA, GZMB, HLA-DRA, HLA-DRB1, IL7, IL2RB, ITGAL, ITGB2, ITK, JAK3, LCK, NFATC2, PRF1, PTPRC, SIRPG, SIT1, STAT4, TBX21, VAV1                                                                                                                                                                                                                                                                                                                                                                                  | 32          |
| Inflammatory Response | activation            | activation of mast cells               | 4,95E-08 | CCL5, CCR2, CD48, CD300A, FCGR2A, FCGR2B, FYB, ITGAM, LCP2                                                                                                                                                                                                                                                                                                                                                                                                                                                                                                                                      | 9           |
| Inflammatory Response | activation            | activation of natural killer cells     | 4,75E-07 | CCL5, CD2, CD28, CD44, FCGR2A, IL2RB, ITGAL, ITGB2, KLRK1, PRF1, STAT4                                                                                                                                                                                                                                                                                                                                                                                                                                                                                                                          | 11          |
| Inflammatory Response | activation            | activation of antigen presenting cells | 5,10E-06 | CCL5, CD74, CD209, CSF1R, FCGR2A, HCK, HLA-C, HLA-DMB, HLA-DOA, HLA-DQB1, IL7, ITGB6, STAT4                                                                                                                                                                                                                                                                                                                                                                                                                                                                                                     | 13          |
| Inflammatory Response | inflammatory response | inflammatory response                  | 2,84E-14 | ANXA1, AOA1, APOL3 (includes EG:80833), CASP1, CCL5, CCR2, CCR5, CCR7, CD28, CD44, CSF1R, CXCL9, CXCL16, CYBB, ETS1, FCGR2A, FCGR2B, HCK, IL7, IL10RA, ITGAL, ITGAM, ITGB2, ITGB6, LTB4R, LYZ, NFKB1, NLRP3, NOD2, PRKCB, PTPRC, RAC2, SELL, SELPLG, STAT4, THBS2, UACA, VAV1                                                                                                                                                                                                                                                                                                                   | 38          |
| Inflammatory Response | accumulation          | accumulation of leukocytes             | 7,14E-12 | CCL5, CCR2, CCR5, CCR7, CD28, CXCL9, CYBB, DEF6, GFI1, IL7, IL10RA, IL2RG, ITGAL, ITGAM, ITGAX, ITGB2, NFATC2, SELL, SELPLG, TIMP2                                                                                                                                                                                                                                                                                                                                                                                                                                                              | 20          |
| Inflammatory Response | accumulation          | accumulation of mononuclear leukocytes | 3,74E-10 | CCL5, CCR5, CCR7, CD28, DEF6, GFI1, IL7, IL10RA, IL2RG, ITGAL, ITGB2, NFATC2, SELL                                                                                                                                                                                                                                                                                                                                                                                                                                                                                                              | 13          |
| Inflammatory Response | accumulation          | accumulation of lymphocytes            | 1,36E-09 | CCL5, CCR5, CCR7, CD28, DEF6, IL7, IL10RA, IL2RG, ITGAL, ITGB2, NFATC2, SELL                                                                                                                                                                                                                                                                                                                                                                                                                                                                                                                    | 12          |
| Inflammatory Response | accumulation          | accumulation of T lymphocytes          | 1,45E-07 | CCL5, CCR5, CCR7, CD28, DEF6, IL10RA, IL2RG, ITGAL, NFATC2                                                                                                                                                                                                                                                                                                                                                                                                                                                                                                                                      | 9           |
| Inflammatory Response | phagocytosis          | phagocytosis of blood cells            | 7,54E-12 | ANXA1, CD44, CD47, CNN2, CSF2RB, DEF6, FCGR2A, FCGR2B, HCK, IRF8, ITGAM, ITGB2, RAC2, SELPLG                                                                                                                                                                                                                                                                                                                                                                                                                                                                                                    | 14          |
| Inflammatory Response | phagocytosis          | phagocytosis of eukaryotic cells       | 2,08E-11 | ANXA1, CD44, CD47, CNN2, CSF2RB, DEF6, FCGR2A, FCGR2B, HCK, IRF8, ITGAM, ITGB2, PRKCB, RAC2, SELPLG, VAV1                                                                                                                                                                                                                                                                                                                                                                                                                                                                                       | 16          |



|                       |               |                                     |          |                                                                                                                                     |    |
|-----------------------|---------------|-------------------------------------|----------|-------------------------------------------------------------------------------------------------------------------------------------|----|
| Inflammatory Response | phagocytosis  | phagocytosis                        | 3,55E-11 | ANXA1, CD44, CD47, CLEC7A, CNN2, CSF2RB, DEF6, FCGR2A, FCGR2B, HCK, IRF8, ITGAM, ITGAX, ITGB2, PRKCB, RAC2, SELPLG, VAV1            | 18 |
| Inflammatory Response | phagocytosis  | phagocytosis of cells               | 4,30E-11 | ANXA1, CD44, CD47, CNN2, CSF2RB, DEF6, FCGR2A, FCGR2B, HCK, IRF8, ITGAM, ITGAX, ITGB2, PRKCB, RAC2, SELPLG, VAV1                    | 17 |
| Inflammatory Response | phagocytosis  | phagocytosis of leukocytes          | 1,00E-10 | ANXA1, CD44, CD47, CNN2, CSF2RB, DEF6, FCGR2A, FCGR2B, IRF8, ITGAM, ITGB2, SELPLG                                                   | 12 |
| Inflammatory Response | phagocytosis  | phagocytosis of phagocytes          | 6,05E-10 | ANXA1, CD44, CD47, CNN2, CSF2RB, DEF6, FCGR2A, FCGR2B, ITGAM, ITGB2, SELPLG                                                         | 11 |
| Inflammatory Response | phagocytosis  | phagocytosis of myeloid cells       | 7,84E-09 | ANXA1, CD47, CSF2RB, FCGR2A, IRF8, ITGAM, ITGB2, SELPLG                                                                             | 8  |
| Inflammatory Response | phagocytosis  | phagocytosis of granulocytes        | 1,47E-07 | ANXA1, CD47, CSF2RB, FCGR2A, ITGAM, ITGB2, SELPLG                                                                                   | 7  |
| Inflammatory Response | phagocytosis  | phagocytosis of tumor cell lines    | 3,25E-07 | ANXA1, CD44, DEF6, FCGR2A, FCGR2B, ITGAM, PRKCB                                                                                     | 7  |
| Inflammatory Response | phagocytosis  | phagocytosis of red blood cells     | 6,31E-07 | CD44, FCGR2A, HCK, ITGAM, ITGB2, RAC2                                                                                               | 6  |
| Inflammatory Response | phagocytosis  | phagocytosis of cell lines          | 8,56E-07 | ANXA1, CD44, DEF6, FCGR2A, FCGR2B, ITGAM, PRKCB, VAV1                                                                               | 8  |
| Inflammatory Response | phagocytosis  | phagocytosis of macrophages         | 1,23E-06 | ANXA1, CD44, CD47, CNN2, DEF6, FCGR2B, ITGB2                                                                                        | 7  |
| Inflammatory Response | phagocytosis  | phagocytosis of neutrophils         | 1,95E-06 | CD47, CSF2RB, FCGR2A, ITGAM, ITGB2, SELPLG                                                                                          | 6  |
| Inflammatory Response | phagocytosis  | phagocytosis of leukemia cell lines | 2,43E-06 | ANXA1, DEF6, FCGR2A, FCGR2B, PRKCB                                                                                                  | 5  |
| Inflammatory Response | recruitment   | recruitment of phagocytes           | 2,30E-10 | AHR, ANXA1, CCL5, CCR2, CCR5, CD28, CD44, CD8A, CLU, ETS1, FCGR2B, ITGAM, ITGB2, LYZ, THBS2                                         | 15 |
| Inflammatory Response | recruitment   | recruitment of macrophages          | 1,01E-06 | ANXA1, CCR2, CCR5, CD44, CD8A, ETS1, ITGB2, THBS2                                                                                   | 8  |
| Inflammatory Response | degranulation | degranulation of eukaryotic cells   | 1,11E-09 | ANXA1, CD300A, FCGR2A, FCGR2B, HCK, ITGAM, ITGB2, ITK, KLRK1, LCP2, LTB4R, RAC2, SLA, VAV1, WIPF1                                   | 15 |
| Inflammatory Response | degranulation | degranulation of mast cells         | 3,22E-06 | ANXA1, CD300A, HCK, ITK, LCP2, RAC2, VAV1, WIPF1                                                                                    | 8  |
| Inflammatory Response | degranulation | degranulation of granulocytes       | 6,13E-06 | ANXA1, FCGR2A, FCGR2B, ITGAM, ITGB2, LTB4R                                                                                          | 6  |
| Inflammatory Response | aggregation   | aggregation of leukocytes           | 2,37E-09 | CD44, CD209, IL7, ITGAL, ITGAM, ITGB2, LCK, NRP1, SELL, SELPLG                                                                      | 10 |
| Inflammatory Response | aggregation   | aggregation of phagocytes           | 4,88E-06 | ITGAM, ITGB2, LCK, SELL, SELPLG                                                                                                     | 5  |
| Inflammatory Response | aggregation   | aggregation of blood platelets      | 9,79E-06 | ADRA2A, CCL5, CD47, FCGR2A, HCLS1, LCP2, SELL, THBS2, TIMP2, VAV1                                                                   | 10 |
| Inflammatory Response | aggregation   | aggregation of neutrophils          | 1,16E-05 | ITGAM, ITGB2, SELL, SELPLG                                                                                                          | 4  |
| Inflammatory Response | cell movement | cell movement                       | 4,29E-09 | ANXA1, CASP1, CCL5, CCR2, CCR5, CD28, CD44, CD47, CSF1R, CXCL9, FCGR2A, HCK, ITGAL, ITGAM, ITGAX, ITGB2, LTB4R, RAC2, SELL, SELPLG, | 21 |

|                       |                     |                                        |          |                                                                                                                                                           |    |
|-----------------------|---------------------|----------------------------------------|----------|-----------------------------------------------------------------------------------------------------------------------------------------------------------|----|
|                       |                     | of phagocytes                          |          | TGFBR2                                                                                                                                                    |    |
| Inflammatory Response | cell movement       | cell movement of neutrophils           | 5,75E-09 | ANXA1, CASP1, CCL5, CCR2, CD28, CD44, CD47, FCGR2A, HCK, ITGAL, ITGAM, ITGAX, ITGB2, LTB4R, RAC2, SELL, SELPLG, TGFBR2                                    | 18 |
| Inflammatory Response | cell movement       | cell movement of bone marrow cells     | 7,72E-06 | ANXA1, CD44, CD47, CXCL9, ITGAL, ITGAM, ITGAX, ITGB2                                                                                                      | 8  |
| Inflammatory Response | adhesion            | adhesion of neutrophils                | 6,75E-09 | ANXA1, CD44, ITGAL, ITGAM, ITGAX, ITGB2, LCP1, SELL, SELPLG, VAV1                                                                                         | 10 |
| Inflammatory Response | adhesion            | adhesion of dendritic cells            | 7,05E-06 | CD44, CD209, ITGAL, ITGAM                                                                                                                                 | 4  |
| Inflammatory Response | inflammation        | inflammation                           | 8,58E-09 | ADAM12, CASP1, CCL5, CCR2, CCR5, CD44, CD47, CLU, CTSS, FCGR2A, FCGR2B, IL2RG, IL7R, ITGB2, ITK, NLRP3, PRF1, PTPRC, SELL, STAT4, TGFBR2, THBS2, TNFSF13B | 23 |
| Inflammatory Response | inflammation        | inflammation of organ                  | 9,45E-08 | CASP1, CCR2, CCR5, CD44, CD47, CLU, CTSS, FCGR2A, FCGR2B, ITGB2, ITK, NLRP3, PRF1, STAT4, THBS2, TNFSF13B                                                 | 16 |
| Inflammatory Response | processing          | processing of antigen                  | 2,09E-08 | CD74, FCGR2B, HLA-DMB, HLA-DOA, HLA-DQB1, HLA-DRA, HLA-DRB1                                                                                               | 7  |
| Inflammatory Response | migration           | migration of phagocytes                | 4,15E-08 | ANXA1, CCL5, CD47, CNN2, CSF1R, HCK, ITGAL, ITGAM, ITGAX, ITGB2, MMP7, RAC2, SELL                                                                         | 13 |
| Inflammatory Response | migration           | migration of neutrophils               | 1,42E-07 | ANXA1, CCL5, CD47, CNN2, HCK, ITGAL, ITGAM, ITGAX, ITGB2, MMP7, SELL                                                                                      | 11 |
| Inflammatory Response | binding             | binding of phagocytes                  | 2,27E-07 | CD2, CD209, FCGR2A, HCK, ITGAL, ITGAM, ITGB2, PTPRC, SELL, SELPLG                                                                                         | 10 |
| Inflammatory Response | chemotaxis          | chemotaxis of leukocytes               | 3,58E-07 | ANXA1, CCL5, CCR2, CCR5, CCR7, CD28, CXCL9, CXCL16, FCGR2A, HCK, ITGAL, ITGAM, ITGB2, LTB4R, PRKCB, PTPRC, RAC2, THBS2                                    | 18 |
| Inflammatory Response | chemotaxis          | chemotaxis of myeloid cells            | 9,94E-06 | ANXA1, CCL5, CD28, CXCL9, FCGR2A, HCK, ITGAM, ITGB2, LTB4R, PTPRC, RAC2                                                                                   | 11 |
| Inflammatory Response | infiltration        | infiltration by neutrophils            | 1,14E-06 | ANXA1, CASP1, CCR2, CD44, ITGAL, ITGAM, ITGB2, LTB4R, RAC2, SELL, TGFBR2                                                                                  | 11 |
| Inflammatory Response | antibody response   | antibody response                      | 2,39E-06 | CCL5, CCR2, CD28, HLA-B, IL7, LCP2, PTPRC, SH2D1A, TNFSF13B, VAV1                                                                                         | 10 |
| Inflammatory Response | transmigration      | transmigration of eosinophils          | 2,43E-06 | CD47, CXCL9, ITGAL, ITGAM, ITGB2                                                                                                                          | 5  |
| Inflammatory Response | transmigration      | transmigration of granulocytes         | 3,66E-06 | ANXA1, CD47, CXCL9, ITGAL, ITGAM, ITGAX, ITGB2                                                                                                            | 7  |
| Inflammatory Response | transmigration      | transmigration of neutrophils          | 9,11E-06 | ANXA1, CD47, ITGAL, ITGAM, ITGAX, ITGB2                                                                                                                   | 6  |
| Inflammatory Response | TH1 immune response | TH1 immune response of animal          | 3,18E-06 | CCR5, CLEC7A, IRF1, ITK, STAT4, TBX21                                                                                                                     | 6  |
| Inflammatory Response | trafficking         | trafficking of phagocytes              | 3,84E-06 | CCL5, CCR5, ITGB2                                                                                                                                         | 3  |
| Inflammatory Response | quantity            | quantity of phagocytes                 | 4,80E-06 | AHR, CCR2, CNN2, CSF1R, CTSS, ITGB2, ITGB6, JAK3, RAC2, SELL, SELPLG, SH2B3, STAT4                                                                        | 13 |
| Inflammatory Response | CD4 T-cell response | CD4 T-cell response                    | 9,71E-06 | CASP1, CCR5, CLEC7A, IL7, IRF1, ITK, STAT4, TBX21                                                                                                         | 8  |
| Inflammatory Response | cytotoxic reaction  | cytotoxic reaction of eukaryotic cells | 1,06E-05 | ATM, CD47, CD48, FCGR2A, ITGAM, LCK, VAV1                                                                                                                 | 7  |
| Inflammatory Response | respiratory burst   | respiratory burst of leukocytes        | 1,06E-05 | HCK, IRF8, ITGAL, ITGAM, ITGAX, ITGB2, PTPRC                                                                                                              | 7  |
| Inflammatory Response | respiratory         | respiratory                            | 1,21E-   | CYBB, HCK, IRF8, ITGAL, ITGAM, ITGAX, ITGB2, PTPRC                                                                                                        | 8  |

|                      |                       |                                                    |          |                                                                                                                                                                                                                                                                                                                                                                                                                                                                                                                                                                                                          |    |
|----------------------|-----------------------|----------------------------------------------------|----------|----------------------------------------------------------------------------------------------------------------------------------------------------------------------------------------------------------------------------------------------------------------------------------------------------------------------------------------------------------------------------------------------------------------------------------------------------------------------------------------------------------------------------------------------------------------------------------------------------------|----|
| ry Response          | burst                 | burst                                              | 05       |                                                                                                                                                                                                                                                                                                                                                                                                                                                                                                                                                                                                          |    |
| Cellular Development | developmental process | developmental process of blood cells               | 3,48E-41 | AHR, ANXA1, ATM, BCL11A, BCL11B, BCL2A1, CASP1, CCL5, CCND2, CCR2, CCR5, CCR7, CD2, CD28, CD44, CD47, CD74, CD209, CD247, CD300A, CD3D, CD8A, CIITA, CSF1R, CSF2RB, DEF6, EBF1, EOMES, ETS1, ETV6, FCGR2A, FCGR2B, FLI1, GFI1, GFRA1, GZMA, GZMB, HCLS1, HHEX, HLA-C, HLA-DOA, HLA-DQB1, IKZF1, IL7, IL10RA, IL2RB, IL2RG, IL7R, IRF1, IRF4, IRF8, ITGAL, ITGAM, ITGB2, ITGB6, ITK, JAK3, LCK, LCP2, LEF1, MAP4K1, MYB (includes EG:4602), NFAM1, NFATC2, NOTCH2, PRF1, PTPN22, PTPRC, RAC2, RASGRP4, RASSF5, RUNX1, RUNX2, SH2B3, SH2D1A, SIT1, STAT4, TBX21, TCF4, TGFB2, THBS2, TNFSF13B, VAV1, WIPF1 | 84 |
| Cellular Development | developmental process | developmental process of leukocytes                | 4,17E-40 | AHR, ANXA1, ATM, BCL11A, BCL11B, BCL2A1, CASP1, CCL5, CCR2, CCR5, CCR7, CD2, CD28, CD44, CD47, CD74, CD209, CD247, CD300A, CD3D, CD8A, CIITA, CSF1R, CSF2RB, DEF6, EBF1, EOMES, ETS1, FCGR2A, FCGR2B, GFI1, GFRA1, GZMA, GZMB, HLA-C, HLA-DOA, HLA-DQB1, IKZF1, IL7, IL10RA, IL2RB, IL2RG, IL7R, IRF1, IRF4, IRF8, ITGAL, ITGAM, ITGB2, ITGB6, ITK, JAK3, LCK, LCP2, LEF1, MAP4K1, MYB (includes EG:4602), NFAM1, NFATC2, NOTCH2, PRF1, PTPN22, PTPRC, RAC2, RASGRP4, RASSF5, RUNX1, RUNX2, SH2B3, SH2D1A, SIT1, STAT4, TBX21, TCF4, TGFB2, THBS2, TNFSF13B, VAV1, WIPF1                                 | 79 |
| Cellular Development | developmental process | developmental process of mononuclear leukocytes    | 8,26E-39 | AHR, ANXA1, ATM, BCL11A, BCL11B, BCL2A1, CASP1, CCL5, CCR5, CCR7, CD2, CD28, CD44, CD47, CD74, CD247, CD3D, CD8A, CIITA, CSF1R, DEF6, EBF1, EOMES, ETS1, FCGR2A, FCGR2B, GFI1, GFRA1, GZMA, GZMB, HLA-C, HLA-DOA, HLA-DQB1, IKZF1, IL7, IL10RA, IL2RB, IL2RG, IL7R, IRF1, IRF4, IRF8, ITGAL, ITGAM, ITGB2, ITK, JAK3, LCK, LCP2, LEF1, MAP4K1, MYB (includes EG:4602), NFAM1, NFATC2, NOTCH2, PRF1, PTPN22, PTPRC, RAC2, RASSF5, RUNX1, RUNX2, SH2B3, SH2D1A, SIT1, STAT4, TBX21, TCF4, TGFB2, THBS2, TNFSF13B, VAV1, WIPF1                                                                              | 73 |
| Cellular Development | developmental process | developmental process of lymphocytes               | 3,33E-37 | AHR, ANXA1, ATM, BCL11A, BCL11B, BCL2A1, CASP1, CCL5, CCR5, CCR7, CD2, CD28, CD44, CD47, CD74, CD247, CD3D, CD8A, CIITA, DEF6, EBF1, EOMES, ETS1, FCGR2A, FCGR2B, GFI1, GZMA, GZMB, HLA-C, HLA-DOA, HLA-DQB1, IKZF1, IL7, IL10RA, IL2RB, IL2RG, IL7R, IRF1, IRF4, IRF8, ITGAL, ITGB2, ITK, JAK3, LCK, LCP2, LEF1, MAP4K1, MYB (includes EG:4602), NFAM1, NFATC2, NOTCH2, PRF1, PTPN22, PTPRC, RAC2, RASSF5, RUNX1, RUNX2, SH2B3, SH2D1A, SIT1, STAT4, TBX21, TCF4, TGFB2, THBS2, TNFSF13B, VAV1, WIPF1                                                                                                   | 70 |
| Cellular Development | developmental process | developmental process of helper T lymphocytes      | 7,59E-17 | AHR, ANXA1, CASP1, CD28, ETS1, GFI1, IL7, IL2RB, IRF1, IRF8, ITGAL, ITGB2, ITK, JAK3, LCP2, NFATC2, RUNX1, SH2D1A, STAT4, TBX21, TGFB2, TNFSF13B, VAV1                                                                                                                                                                                                                                                                                                                                                                                                                                                   | 23 |
| Cellular Development | developmental process | developmental process of thymocytes                | 9,99E-15 | CD2, CD28, CD74, CD247, CD3D, ETS1, FCGR2B, IKZF1, IL7, IL2RB, IL2RG, IL7R, IRF1, LCK, LCP2, MYB (includes EG:4602), PTPRC, RUNX1, SIT1                                                                                                                                                                                                                                                                                                                                                                                                                                                                  | 19 |
| Cellular Development | developmental process | developmental process of Th2 cells                 | 8,18E-10 | CD28, GFI1, IRF1, ITK, JAK3, LCP2, NFATC2, RUNX1, SH2D1A, STAT4, TBX21, VAV1                                                                                                                                                                                                                                                                                                                                                                                                                                                                                                                             | 12 |
| Cellular Development | developmental process | developmental process of B lymphocytes             | 1,18E-09 | AHR, BCL11A, CD74, EBF1, IKZF1, IL7, IL2RB, IL2RG, IL7R, IRF4, JAK3, MYB (includes EG:4602), NFAM1, NFATC2, NOTCH2, PTPRC, TCF4, TNFSF13B, VAV1                                                                                                                                                                                                                                                                                                                                                                                                                                                          | 19 |
| Cellular Development | developmental process | developmental process of hematopoietic cells       | 2,52E-09 | CCND2, CSF1R, EBF1, ETV6, FLI1, GFI1, HHEX, IKZF1, IL7, IRF8, JAK3, MYB (includes EG:4602), PTPRC, RUNX1, RUNX2, SH2B3, THBS2                                                                                                                                                                                                                                                                                                                                                                                                                                                                            | 17 |
| Cellular Development | developmental process | developmental process of bone marrow cells         | 9,77E-09 | CCND2, CD44, CD8A, CSF1R, CSF2RB, ETV6, FLI1, GFI1, IL7, IL2RB, IRF8, JAK3, MYB (includes EG:4602), RASGRP4, RUNX1, RUNX2, SH2B3, THBS2, VAV1                                                                                                                                                                                                                                                                                                                                                                                                                                                            | 19 |
| Cellular Development | developmental process | developmental process of gamma-delta T lymphocytes | 3,83E-08 | CD3D, IL7, IL2RG, JAK3, LCK, PTPRC                                                                                                                                                                                                                                                                                                                                                                                                                                                                                                                                                                       | 6  |

|                      |                       |                                                           |          |                                                                                                                                                                                                                                                                                                                                                |    |
|----------------------|-----------------------|-----------------------------------------------------------|----------|------------------------------------------------------------------------------------------------------------------------------------------------------------------------------------------------------------------------------------------------------------------------------------------------------------------------------------------------|----|
| Cellular Development | developmental process | developmental process of leukocyte cell lines             | 1,03E-07 | CCND2, CD28, CSF2RB, ETV6, IKZF1, IL10RA, IL2RB, IL2RG, IRF1, JAK3, LCP2, MYB (includes EG:4602), NOTCH2, RUNX1, SH2B3                                                                                                                                                                                                                         | 15 |
| Cellular Development | developmental process | developmental process of hematopoietic progenitor cells   | 1,43E-07 | CCND2, CSF1R, EBF1, FLI1, GFI1, HHEX, IKZF1, IL7, IRF8, MYB (includes EG:4602), RUNX1, RUNX2, SH2B3, THBS2                                                                                                                                                                                                                                     | 14 |
| Cellular Development | developmental process | developmental process of antigen presenting cells         | 1,53E-07 | CCL5, CCR2, CD44, CD47, CD209, CSF1R, CSF2RB, FCGR2B, GFI1, IKZF1, IRF1, IRF4, IRF8, ITGB6, MYB (includes EG:4602), TGFBR2                                                                                                                                                                                                                     | 16 |
| Cellular Development | developmental process | developmental process of dendritic cells                  | 2,25E-07 | CCL5, CCR2, CD44, CD209, CSF1R, FCGR2B, GFI1, IKZF1, IRF1, IRF4, IRF8, ITGB6, TGFBR2                                                                                                                                                                                                                                                           | 13 |
| Cellular Development | developmental process | developmental process of Th1 cells                        | 5,38E-07 | ANXA1, CASP1, IRF1, IRF8, ITGAL, ITGB2, JAK3, LCP2, STAT4, TBX21                                                                                                                                                                                                                                                                               | 10 |
| Cellular Development | developmental process | developmental process of myeloid cells                    | 5,56E-07 | CD8A, CSF1R, CSF2RB, GFI1, IL7, IL2RB, IRF8, JAK3, MYB (includes EG:4602), RASGRP4, RUNX1, RUNX2, SH2B3                                                                                                                                                                                                                                        | 13 |
| Cellular Development | developmental process | developmental process of natural killer T lymphocytes     | 6,31E-07 | ETS1, IKZF1, ITK, SH2D1A, TBX21, TGFBR2                                                                                                                                                                                                                                                                                                        | 6  |
| Cellular Development | developmental process | developmental process of intraepithelial T lymphocytes    | 2,01E-06 | IL7, IRF1, LCK, PTPRC                                                                                                                                                                                                                                                                                                                          | 4  |
| Cellular Development | developmental process | developmental process of lymphoid cells                   | 7,05E-06 | IL2RG, JAK3, LCP2, PRF1                                                                                                                                                                                                                                                                                                                        | 4  |
| Cellular Development | developmental process | developmental process of Th17 cells                       | 9,11E-06 | AHR, ETS1, IL7, STAT4, TGFBR2, TNFSF13B                                                                                                                                                                                                                                                                                                        | 6  |
| Cellular Development | developmental process | developmental process of common lymphoid progenitor cells | 1,16E-05 | EBF1, IKZF1, IL7, SH2B3                                                                                                                                                                                                                                                                                                                        | 4  |
| Cellular Development | developmental process | arrest in developmental process of blood cells            | 1,32E-05 | CD3D, IRF8, LCK, LCP2, PTPRC, RUNX1                                                                                                                                                                                                                                                                                                            | 6  |
| Cellular Development | developmental process | developmental process of myeloid progenitor cells         | 1,59E-05 | CSF1R, GFI1, IL7, IRF8, RUNX1, RUNX2, SH2B3                                                                                                                                                                                                                                                                                                    | 7  |
| Cellular Development | development           | development of leukocytes                                 | 1,19E-38 | AHR, ANXA1, ATM, BCL11A, BCL11B, BCL2A1, CASP1, CCL5, CCR5, CCR7, CD2, CD28, CD44, CD47, CD74, CD247, CD3D, CD8A, CIITA, CSF1R, DEF6, EBF1, EOMES, ETS1, FCGR2A, FCGR2B, GFI1, GZMA, GZMB, HLA-C, HLA-DOA, HLA-DQB1, IKZF1, IL7, IL10RA, IL2RB, IL2RG, IL7R, IRF1, IRF4, IRF8, ITGAL, ITGB2, ITK, JAK3, LCK, LCP2, LEF1, MAP4K1, MYB (includes | 69 |

|                      |                 |                                       |          |                                                                                                                                                                                                                                                                                                                                                                                                                                                                                                                                                                                                                                                 |    |
|----------------------|-----------------|---------------------------------------|----------|-------------------------------------------------------------------------------------------------------------------------------------------------------------------------------------------------------------------------------------------------------------------------------------------------------------------------------------------------------------------------------------------------------------------------------------------------------------------------------------------------------------------------------------------------------------------------------------------------------------------------------------------------|----|
|                      |                 |                                       |          | EG:4602), NFATC2, NOTCH2, PRF1, PTPN22, PTPRC, RAC2, RASSF5, RUNX1, RUNX2, SH2D1A, SIT1, STAT4, TBX21, TCF4, TGFBR2, THBS2, TNFSF13B, VAV1, WIPF1                                                                                                                                                                                                                                                                                                                                                                                                                                                                                               |    |
| Cellular Development | development     | T cell development                    | 1,24E-38 | AHR, ANXA1, ATM, BCL11A, BCL11B, BCL2A1, CASP1, CCL5, CCR5, CCR7, CD2, CD28, CD44, CD47, CD74, CD247, CD3D, CD8A, CIITA, DEF6, EOMES, ETS1, FCGR2A, FCGR2B, GFI1, GZMA, GZMB, HLA-C, HLA-DOA, HLA-DQB1, IKZF1, IL7, IL10RA, IL2RB, IL2RG, IL7R, IRF1, IRF4, IRF8, ITGAL, ITGB2, ITK, JAK3, LCK, LCP2, LEF1, MAP4K1, MYB (includes EG:4602), NFATC2, PRF1, PTPN22, PTPRC, RAC2, RASSF5, RUNX1, RUNX2, SH2D1A, SIT1, STAT4, TBX21, TCF4, TGFBR2, THBS2, TNFSF13B, VAV1, WIPF1                                                                                                                                                                     | 66 |
| Cellular Development | development     | development of lymphocytes            | 1,44E-38 | AHR, ANXA1, ATM, BCL11A, BCL11B, BCL2A1, CASP1, CCL5, CCR5, CCR7, CD2, CD28, CD44, CD47, CD74, CD247, CD3D, CD8A, CIITA, DEF6, EBF1, EOMES, ETS1, FCGR2A, FCGR2B, GFI1, GZMA, GZMB, HLA-C, HLA-DOA, HLA-DQB1, IKZF1, IL7, IL10RA, IL2RB, IL2RG, IL7R, IRF1, IRF4, IRF8, ITGAL, ITGB2, ITK, JAK3, LCK, LCP2, LEF1, MAP4K1, MYB (includes EG:4602), NFATC2, NOTCH2, PRF1, PTPN22, PTPRC, RAC2, RASSF5, RUNX1, RUNX2, SH2D1A, SIT1, STAT4, TBX21, TCF4, TGFBR2, THBS2, TNFSF13B, VAV1, WIPF1                                                                                                                                                       | 68 |
| Cellular Development | development     | development of cells                  | 2,60E-32 | ADRA2A, AHR, ANTXR1, ANXA1, ATM, BASP1, BCL11A, BCL11B, BCL2A1, CASP1, CCL5, CCR2, CCR5, CCR7, CD2, CD28, CD44, CD47, CD74, CD247, CD3D, CD8A, CDC42SE1, CIITA, CNN2, CSF1R, DEF6, DGKA, EBF1, EOMES, ETS1, ETV6, FCGR2A, FCGR2B, GFI1, GFRA1, GZMA, GZMB, HCK, HHEX, HLA-C, HLA-DOA, HLA-DQB1, IKZF1, IL7, IL10RA, IL2RB, IL2RG, IL7R, IRF1, IRF4, IRF8, ITGAL, ITGAM, ITGB2, ITK, JAK3, KLRK1, LCK, LCP2, LEF1, MAP4K1, MARCKS, MYB (includes EG:4602), MYH9, NFATC2, NOTCH2, PARVG, PRF1, PTPN22, PTPRC, RAC2, RASSF5, ROBO1, RUNX1, RUNX2, SELL, SH2B3, SH2D1A, SIT1, STAT4, TBX21, TCF4, TGFBR2, THBS2, TIMP2, TNFSF13B, TPM1, VAV1, WIPF1 | 90 |
| Cellular Development | development     | development of thymocytes             | 4,81E-10 | CD74, CD3D, ETS1, IL7, IL2RB, IL2RG, IL7R, IRF1, LCP2, MYB (includes EG:4602), PTPRC, SIT1                                                                                                                                                                                                                                                                                                                                                                                                                                                                                                                                                      | 12 |
| Cellular Development | development     | development of helper T lymphocytes   | 7,26E-07 | AHR, CASP1, CD28, IRF1, ITGB2, ITK, STAT4, TBX21                                                                                                                                                                                                                                                                                                                                                                                                                                                                                                                                                                                                | 8  |
| Cellular Development | development     | NK cell development                   | 9,73E-07 | CD2, EOMES, FCGR2A, IKZF1, IL7, IRF1, ITGAL, JAK3, TBX21                                                                                                                                                                                                                                                                                                                                                                                                                                                                                                                                                                                        | 9  |
| Cellular Development | development     | development of B lymphocytes          | 1,06E-06 | EBF1, IL7, IL2RG, IL7R, JAK3, MYB (includes EG:4602), NOTCH2, TCF4, TNFSF13B, VAV1                                                                                                                                                                                                                                                                                                                                                                                                                                                                                                                                                              | 10 |
| Cellular Development | development     | development of lymphatic system cells | 6,65E-06 | CD44, CD8A, ETV6, IL7, IL2RB, IL2RG, JAK3, LCP2, THBS2                                                                                                                                                                                                                                                                                                                                                                                                                                                                                                                                                                                          | 9  |
| Cellular Development | differentiation | differentiation of blood cells        | 3,36E-33 | AHR, ANXA1, ATM, BCL11A, BCL2A1, CD2, CD28, CD47, CD74, CD300A, CD3D, CD8A, CSF1R, CSF2RB, DEF6, EBF1, ETS1, ETV6, FCGR2B, FLI1, GFI1, HCLS1, HHEX, HLA-C, HLA-DOA, IKZF1, IL7, IL2RB, IL2RG, IL7R, IRF1, IRF4, IRF8, ITGAL, ITGAM, ITGB2, ITGB6, ITK, JAK3, LCK, LCP2, LEF1, MAP4K1, MYB (includes EG:4602), NFAM1, NFATC2, PTPN22, PTPRC, RASGRP4, RASSF5, RUNX1, RUNX2, SH2D1A, SIT1, STAT4, TBX21, TGFBR2, THBS2, TNFSF13B, VAV1, WIPF1                                                                                                                                                                                                     | 61 |
| Cellular Development | differentiation | differentiation of leukocytes         | 1,01E-30 | AHR, ANXA1, ATM, BCL11A, BCL2A1, CD2, CD28, CD47, CD74, CD300A, CD3D, CD8A, CSF1R, CSF2RB, DEF6, EBF1, ETS1, FCGR2B, GFI1, HLA-C, HLA-DOA, IKZF1, IL7, IL2RB, IL2RG, IL7R, IRF1, IRF4, IRF8, ITGAL, ITGAM, ITGB2, ITGB6, ITK, JAK3, LCK, LCP2, LEF1, MYB (includes EG:4602), NFAM1, NFATC2, PTPN22, PTPRC, RASGRP4, RASSF5, RUNX1, RUNX2, SH2D1A, SIT1, STAT4, TBX21, TGFBR2, TNFSF13B, VAV1, WIPF1                                                                                                                                                                                                                                             | 55 |
| Cellular Development | differentiation | differentiation of T lymphocytes      | 1,50E-28 | AHR, ANXA1, ATM, BCL11A, BCL2A1, CD2, CD28, CD74, CD8A, DEF6, ETS1, FCGR2B, HLA-C, HLA-DOA, IKZF1, IL7, IL2RB, IL2RG, IL7R, IRF1, IRF4, IRF8, ITGAL, ITGB2, ITK, JAK3, LCK, LCP2, LEF1, MYB (includes EG:4602), NFATC2, PTPN22, PTPRC, RASSF5, RUNX1, SH2D1A, STAT4, TBX21, TGFBR2, TNFSF13B, VAV1, WIPF1                                                                                                                                                                                                                                                                                                                                       | 42 |
| Cellular Development | differentiation | differentiation of lymphocytes        | 1,06E-27 | AHR, ANXA1, ATM, BCL11A, BCL2A1, CD2, CD28, CD74, CD3D, CD8A, DEF6, EBF1, ETS1, FCGR2B, HLA-C, HLA-DOA, IKZF1, IL7, IL2RB, IL2RG, IL7R, IRF1, IRF4, IRF8, ITGAL, ITGB2, ITK, JAK3, LCK, LCP2, LEF1, MYB (includes                                                                                                                                                                                                                                                                                                                                                                                                                               | 46 |

|                      |                 |                                                   |          |                                                                                                                                                                                                                                                                                                                                                                                                                                                                                                                                                 |    |
|----------------------|-----------------|---------------------------------------------------|----------|-------------------------------------------------------------------------------------------------------------------------------------------------------------------------------------------------------------------------------------------------------------------------------------------------------------------------------------------------------------------------------------------------------------------------------------------------------------------------------------------------------------------------------------------------|----|
|                      |                 |                                                   |          | EG:4602), NFAM1, NFATC2, PTPN22, PTPRC, RASSF5, RUNX1, SH2D1A, SIT1, STAT4, TBX21, TGFBR2, TNFSF13B, VAV1, WIPF1                                                                                                                                                                                                                                                                                                                                                                                                                                |    |
| Cellular Development | differentiation | differentiation of mononuclear leukocytes         | 5,62E-27 | AHR, ANXA1, ATM, BCL11A, BCL2A1, CD2, CD28, CD74, CD3D, CD8A, CSF1R, DEF6, EBF1, ETS1, FCGR2B, HLA-C, HLA-DOA, IKZF1, IL7, IL2RB, IL2RG, IL7R, IRF1, IRF4, IRF8, ITGAL, ITGB2, ITK, JAK3, LCK, LCP2, LEF1, MYB (includes EG:4602), NFAM1, NFATC2, PTPN22, PTPRC, RASSF5, RUNX1, SH2D1A, SIT1, STAT4, TBX21, TGFBR2, TNFSF13B, VAV1, WIPF1                                                                                                                                                                                                       | 47 |
| Cellular Development | differentiation | differentiation of cells                          | 4,51E-19 | AHR, ANXA1, ATM, BCL11A, BCL2A1, CCL5, CCND2, CD2, CD28, CD44, CD47, CD74, CD300A, CD3D, CD8A, CLU, CSF1R, CSF2RB, DEF6, EBF1, EOMES, ETS1, ETV6, FCGR2B, FLI1, GAS7, GFI1, GFRA1, GZMB, HCLS1, HHEX, HLA-C, HLA-DOA, IKZF1, IL7, IL10RA, IL2RB, IL2RG, IL7R, IRF1, IRF4, IRF8, ITGAL, ITGAM, ITGB2, ITGB6, ITK, JAK3, LCK, LCP2, LEF1, MAP4K1, MYB (includes EG:4602), NFAM1, NFATC2, NOTCH2, NRP1, PRKCB, PTPN22, PTPRC, RASA3, RASGRP4, RASSF5, RUNX1, RUNX2, SH2B3, SH2D1A, SIT1, STAT4, TBX21, TGFBR2, THBS2, TIMP2, TNFSF13B, VAV1, WIPF1 | 76 |
| Cellular Development | differentiation | differentiation of helper T lymphocytes           | 6,25E-15 | AHR, ANXA1, CD28, ETS1, IL7, IL2RB, IRF1, IRF8, ITGAL, ITGB2, ITK, JAK3, NFATC2, RUNX1, SH2D1A, STAT4, TBX21, TGFBR2, TNFSF13B, VAV1                                                                                                                                                                                                                                                                                                                                                                                                            | 20 |
| Cellular Development | differentiation | differentiation of Th2 cells                      | 1,44E-08 | CD28, IRF1, ITK, JAK3, NFATC2, RUNX1, SH2D1A, STAT4, TBX21, VAV1                                                                                                                                                                                                                                                                                                                                                                                                                                                                                | 10 |
| Cellular Development | differentiation | differentiation of hematopoietic cells            | 1,77E-08 | CSF1R, ETV6, FLI1, GFI1, HHEX, IKZF1, IL7, IRF8, JAK3, MYB (includes EG:4602), RUNX1, RUNX2, THBS2                                                                                                                                                                                                                                                                                                                                                                                                                                              | 13 |
| Cellular Development | differentiation | differentiation of hematopoietic progenitor cells | 3,47E-07 | CSF1R, FLI1, GFI1, HHEX, IKZF1, IL7, IRF8, MYB (includes EG:4602), RUNX1, RUNX2, THBS2                                                                                                                                                                                                                                                                                                                                                                                                                                                          | 11 |
| Cellular Development | differentiation | differentiation of B lymphocytes                  | 1,56E-06 | BCL11A, CD74, EBF1, IKZF1, IL7, IL2RB, IL2RG, IL7R, IRF4, NFAM1, PTPRC, TNFSF13B                                                                                                                                                                                                                                                                                                                                                                                                                                                                | 12 |
| Cellular Development | differentiation | differentiation of thymocytes                     | 5,92E-06 | CD2, CD28, FCGR2B, IKZF1, IL2RG, LCP2, MYB (includes EG:4602)                                                                                                                                                                                                                                                                                                                                                                                                                                                                                   | 7  |
| Cellular Development | differentiation | differentiation of Th1 cells                      | 1,21E-05 | ANXA1, IRF1, IRF8, ITGAL, ITGB2, JAK3, STAT4, TBX21                                                                                                                                                                                                                                                                                                                                                                                                                                                                                             | 8  |
| Cellular Development | cell death      | cell death of T lymphocytes                       | 5,27E-17 | ATM, BCL2A1, CASP1, CCL5, CCR5, CD2, CD28, CD44, CD47, CD247, CIITA, DEF6, EOMES, GFI1, GZMA, GZMB, IL7, IL2RG, IL7R, ITK, JAK3, LCK, MAP4K1, PRF1, PTPRC, RAC2, TBX21, TGFBR2, THBS2                                                                                                                                                                                                                                                                                                                                                           | 29 |
| Cellular Development | cell death      | cell death of thymocytes                          | 7,66E-06 | ATM, BCL2A1, CASP1, CD28, CD44, GFI1, GZMA, GZMB, IL7, PTPRC                                                                                                                                                                                                                                                                                                                                                                                                                                                                                    | 10 |
| Cellular Development | apoptosis       | apoptosis of T lymphocytes                        | 7,02E-15 | ATM, BCL2A1, CASP1, CCL5, CCR5, CD2, CD28, CD44, CD47, CD247, CIITA, GFI1, GZMA, GZMB, IL7, IL2RG, IL7R, ITK, JAK3, LCK, MAP4K1, PRF1, PTPRC, RAC2, THBS2                                                                                                                                                                                                                                                                                                                                                                                       | 25 |
| Cellular Development | shape change    | shape change of blood cells                       | 3,13E-14 | ADRA2A, CCL5, CCR2, CD44, CD47, CD247, CNN2, FCGR2A, GZMB, HCK, ITGAL, ITGAM, ITGB2, MYH9, SELL, WIPF1                                                                                                                                                                                                                                                                                                                                                                                                                                          | 16 |
| Cellular Development | shape change    | shape change of leukocytes                        | 1,08E-11 | CCL5, CCR2, CD44, CD47, CD247, CNN2, HCK, ITGAL, ITGAM, ITGB2, MYH9, SELL, WIPF1                                                                                                                                                                                                                                                                                                                                                                                                                                                                | 13 |
| Cellular Development | shape change    | shape change of eukaryotic cells                  | 1,54E-11 | ADRA2A, ANTXR1, BASP1, CCL5, CCR2, CD44, CD47, CD247, CDC42SE1, CNN2, CSF1R, FCGR2A, GZMB, HCK, ITGAL, ITGAM, ITGB2, KLRK1, MARCKS, MYH9, PARVG, ROBO1, RUNX2, SELL, THBS2, TPM1, WIPF1                                                                                                                                                                                                                                                                                                                                                         | 27 |
| Cellular Development | shape change    | shape change of normal cells                      | 1,95E-11 | ADRA2A, BASP1, CCL5, CCR2, CD44, CD47, CD247, CNN2, FCGR2A, GZMB, HCK, ITGAL, ITGAM, ITGB2, MYH9, ROBO1, RUNX2, SELL, THBS2, WIPF1                                                                                                                                                                                                                                                                                                                                                                                                              | 20 |
| Cellular Development | shape change    | shape change of                                   | 1,95E-06 | CCL5, CCR2, HCK, ITGAM, ITGB2, SELL                                                                                                                                                                                                                                                                                                                                                                                                                                                                                                             | 6  |

|                      |                |                                      |          |                                                                                                                                                                                                            |    |  |
|----------------------|----------------|--------------------------------------|----------|------------------------------------------------------------------------------------------------------------------------------------------------------------------------------------------------------------|----|--|
| nt                   |                | granulocytes                         |          |                                                                                                                                                                                                            |    |  |
| Cellular Development | maturation     | maturation of leukocytes             | 2,32E-13 | AHR, ATM, CCL5, CCR2, CD28, CD44, CD209, CD247, FCGR2B, GFRA1, IL7, IRF1, IRF8, ITGAM, ITK, LCK, PTPRC, RUNX1, TBX21, TGFB2, TNFSF13B, VAV1                                                                | 22 |  |
| Cellular Development | maturation     | maturation of blood cells            | 2,94E-13 | AHR, ATM, CCL5, CCND2, CCR2, CD28, CD44, CD209, CD247, FCGR2B, GFRA1, IL7, IRF1, IRF8, ITGAM, ITK, LCK, PTPRC, RUNX1, TBX21, TGFB2, TNFSF13B, VAV1                                                         | 23 |  |
| Cellular Development | maturation     | maturation of cells                  | 6,37E-11 | AHR, ATM, CCL5, CCND2, CCR2, CD28, CD44, CD209, CD247, CLU, FCGR2B, GFRA1, IL7, IRF1, IRF8, ITGAM, ITK, LCK, PRKCB, PTPRC, RUNX1, RUNX2, TBX21, TGFB2, TNFSF13B, VAV1                                      | 26 |  |
| Cellular Development | maturation     | maturation of mononuclear leukocytes | 6,77E-11 | AHR, ATM, CD28, CD247, GFRA1, IL7, ITGAM, ITK, LCK, PTPRC, RUNX1, TBX21, TGFB2, TNFSF13B, VAV1                                                                                                             | 15 |  |
| Cellular Development | maturation     | maturation of lymphocytes            | 4,80E-09 | AHR, ATM, CD28, CD247, IL7, ITK, LCK, PTPRC, RUNX1, TBX21, TGFB2, TNFSF13B, VAV1                                                                                                                           | 13 |  |
| Cellular Development | maturation     | maturation of T lymphocytes          | 4,00E-08 | ATM, CD28, CD247, IL7, ITK, LCK, PTPRC, RUNX1, TBX21, TGFB2                                                                                                                                                | 10 |  |
| Cellular Development | maturation     | maturation of thymocytes             | 2,43E-06 | CD247, IL7, LCK, PTPRC, RUNX1                                                                                                                                                                              | 5  |  |
| Cellular Development | expansion      | expansion of blood cells             | 2,02E-11 | AHR, CCND2, CD2, CD28, GFI1, IL7, IL10RA, IL7R, IRF1, JAK3, LCP2, MYB (includes EG:4602), NFATC2, PRF1, RUNX1, SH2B3, STAT4, TNFSF13B                                                                      | 18 |  |
| Cellular Development | expansion      | expansion of lymphocytes             | 1,84E-09 | AHR, CD2, CD28, GFI1, IL7, IL7R, IRF1, JAK3, LCP2, NFATC2, PRF1, SH2B3, STAT4, TNFSF13B                                                                                                                    | 14 |  |
| Cellular Development | expansion      | expansion of leukocytes              | 1,93E-09 | AHR, CD2, CD28, GFI1, IL7, IL10RA, IL7R, IRF1, JAK3, LCP2, NFATC2, PRF1, SH2B3, STAT4, TNFSF13B                                                                                                            | 15 |  |
| Cellular Development | expansion      | expansion of T lymphocytes           | 2,25E-07 | AHR, CD2, CD28, GFI1, IL7, IRF1, JAK3, LCP2, PRF1, STAT4, TNFSF13B                                                                                                                                         | 11 |  |
| Cellular Development | growth         | growth of blood cells                | 2,10E-11 | AHR, CCND2, CD2, CD28, CSF1R, GFI1, IL7, IL10RA, IL2RB, IL7R, IRF1, IRF8, JAK3, LCP2, MYB (includes EG:4602), NFATC2, PRF1, RUNX1, SH2B3, STAT4, TNFSF13B                                                  | 21 |  |
| Cellular Development | growth         | growth of leukocytes                 | 4,78E-10 | AHR, CD2, CD28, CSF1R, GFI1, IL7, IL10RA, IL2RB, IL7R, IRF1, IRF8, JAK3, LCP2, NFATC2, PRF1, SH2B3, STAT4, TNFSF13B                                                                                        | 18 |  |
| Cellular Development | growth         | growth of lymphocytes                | 4,91E-09 | AHR, CD2, CD28, GFI1, IL7, IL2RB, IL7R, IRF1, JAK3, LCP2, NFATC2, PRF1, SH2B3, STAT4, TNFSF13B                                                                                                             | 15 |  |
| Cellular Development | morphogenesis  | morphogenesis of cells               | 2,62E-10 | ADRA2A, ANTXR1, BASP1, CCL5, CCR2, CD44, CD47, CD247, CDC42SE1, CNN2, CSF1R, FCGR2A, GZMB, HCK, IL7R, ITGAL, ITGAM, ITGB2, KLRK1, MARCKS, MYH9, PARVG, RAC2, ROBO1, RUNX2, SELL, THBS2, TIMP2, TPM1, WIPF1 | 30 |  |
| Cellular Development | cell spreading | cell spreading of blood cells        | 1,89E-09 | CD44, CD47, CD247, CNN2, FCGR2A, GZMB, HCK, ITGAL, ITGAM, ITGB2                                                                                                                                            | 10 |  |
| Cellular Development | cell spreading | cell spreading of leukocytes         | 1,34E-07 | CD44, CD47, CD247, CNN2, HCK, ITGAL, ITGAM, ITGB2                                                                                                                                                          | 8  |  |
| Cellular Development | cell spreading | cell spreading of normal cells       | 1,42E-07 | CD44, CD47, CD247, CNN2, FCGR2A, GZMB, HCK, ITGAL, ITGAM, ITGB2, THBS2                                                                                                                                     | 11 |  |
| Cellular Development | cell spreading | cell spreading of eukaryotic cells   | 2,00E-07 | ANTXR1, CD44, CD47, CD247, CNN2, FCGR2A, GZMB, HCK, ITGAL, ITGAM, ITGB2, KLRK1, PARVG, THBS2, TPM1                                                                                                         | 15 |  |
| Cellular Development | selection      | selection of T lymphocytes           | 4,22E-08 | CD28, CD74, CD3D, HLA-DOA, ITK, PTPRC, SIT1, VAV1                                                                                                                                                          | 8  |  |

|                                               |                               |                                                |          |                                                                                                                                                                                                                                                                                                                                                                                                                                                                                                 |    |
|-----------------------------------------------|-------------------------------|------------------------------------------------|----------|-------------------------------------------------------------------------------------------------------------------------------------------------------------------------------------------------------------------------------------------------------------------------------------------------------------------------------------------------------------------------------------------------------------------------------------------------------------------------------------------------|----|
| Cellular Development                          | polarization                  | polarization of T lymphocytes                  | 4,95E-08 | CD28, CD74, IRF4, LCK, RASSF5, STAT4, TBX21, VAV1, WIPF1                                                                                                                                                                                                                                                                                                                                                                                                                                        | 9  |
| Cellular Development                          | generation                    | generation of T lymphocytes                    | 5,48E-08 | CD28, HLA-DQB1, IL7, IL10RA, IL2RG, ITK, JAK3, STAT4, TBX21, TNFSF13B                                                                                                                                                                                                                                                                                                                                                                                                                           | 10 |
| Cellular Development                          | generation                    | generation of Th1 cells                        | 7,05E-06 | CD28, JAK3, STAT4, TBX21                                                                                                                                                                                                                                                                                                                                                                                                                                                                        | 4  |
| Cellular Development                          | hematopoiesis                 | hematopoiesis of cells                         | 3,07E-07 | ATM, CCR2, CD44, EBF1, ETV6, HHEX, IKZF1, IL7, JAK3, NOTCH2, RUNX1, SH2B3                                                                                                                                                                                                                                                                                                                                                                                                                       | 12 |
| Cellular Development                          | activation-induced cell death | activation-induced cell death of T lymphocytes | 3,25E-07 | CCR5, CD28, CIITA, ITK, MAP4K1, PRF1, RAC2                                                                                                                                                                                                                                                                                                                                                                                                                                                      | 7  |
| Cellular Development                          | proliferation                 | proliferation of thymocytes                    | 1,67E-05 | CD2, CD28, IL7, IL2RG, ITK, JAK3, LCP2, MYB (includes EG:4602)                                                                                                                                                                                                                                                                                                                                                                                                                                  | 8  |
| Hematological System Development and Function | development                   | development of leukocytes                      | 1,19E-38 | AHR, ANXA1, ATM, BCL11A, BCL11B, BCL2A1, CASP1, CCL5, CCR5, CCR7, CD2, CD28, CD44, CD47, CD74, CD247, CD3D, CD8A, CIITA, CSF1R, DEF6, EBF1, EOMES, ETS1, FCGR2A, FCGR2B, GFI1, GZMA, GZMB, HLA-C, HLA-DOA, HLA-DQB1, IKZF1, IL7, IL10RA, IL2RB, IL2RG, IL7R, IRF1, IRF4, IRF8, ITGAL, ITGB2, ITK, JAK3, LCK, LCP2, LEF1, MAP4K1, MYB (includes EG:4602), NFATC2, NOTCH2, PRF1, PTPN22, PTPRC, RAC2, RASSF5, RUNX1, RUNX2, SH2D1A, SIT1, STAT4, TBX21, TCF4, TGFB2, THBS2, TNFSF13B, VAV1, WIPF1 | 69 |
| Hematological System Development and Function | development                   | T cell development                             | 1,24E-38 | AHR, ANXA1, ATM, BCL11A, BCL11B, BCL2A1, CASP1, CCL5, CCR5, CCR7, CD2, CD28, CD44, CD47, CD74, CD247, CD3D, CD8A, CIITA, DEF6, EOMES, ETS1, FCGR2A, FCGR2B, GFI1, GZMA, GZMB, HLA-C, HLA-DOA, HLA-DQB1, IKZF1, IL7, IL10RA, IL2RB, IL2RG, IL7R, IRF1, IRF4, IRF8, ITGAL, ITGB2, ITK, JAK3, LCK, LCP2, LEF1, MAP4K1, MYB (includes EG:4602), NFATC2, PRF1, PTPN22, PTPRC, RAC2, RASSF5, RUNX1, RUNX2, SH2D1A, SIT1, STAT4, TBX21, TCF4, TGFB2, THBS2, TNFSF13B, VAV1, WIPF1                      | 66 |
| Hematological System Development and Function | development                   | development of lymphocytes                     | 1,44E-38 | AHR, ANXA1, ATM, BCL11A, BCL11B, BCL2A1, CASP1, CCL5, CCR5, CCR7, CD2, CD28, CD44, CD47, CD74, CD247, CD3D, CD8A, CIITA, DEF6, EBF1, EOMES, ETS1, FCGR2A, FCGR2B, GFI1, GZMA, GZMB, HLA-C, HLA-DOA, HLA-DQB1, IKZF1, IL7, IL10RA, IL2RB, IL2RG, IL7R, IRF1, IRF4, IRF8, ITGAL, ITGB2, ITK, JAK3, LCK, LCP2, LEF1, MAP4K1, MYB (includes EG:4602), NFATC2, NOTCH2, PRF1, PTPN22, PTPRC, RAC2, RASSF5, RUNX1, RUNX2, SH2D1A, SIT1, STAT4, TBX21, TCF4, TGFB2, THBS2, TNFSF13B, VAV1, WIPF1        | 68 |
| Hematological System Development and Function | development                   | development of thymocytes                      | 4,81E-10 | CD74, CD3D, ETS1, IL7, IL2RB, IL2RG, IL7R, IRF1, LCP2, MYB (includes EG:4602), PTPRC, SIT1                                                                                                                                                                                                                                                                                                                                                                                                      | 12 |
| Hematological System Development and Function | development                   | development of helper T lymphocytes            | 7,26E-07 | AHR, CASP1, CD28, IRF1, ITGB2, ITK, STAT4, TBX21                                                                                                                                                                                                                                                                                                                                                                                                                                                | 8  |
| Hematological System Development and Function | development                   | NK cell development                            | 9,73E-07 | CD2, EOMES, FCGR2A, IKZF1, IL7, IRF1, ITGAL, JAK3, TBX21                                                                                                                                                                                                                                                                                                                                                                                                                                        | 9  |
| Hematological System Development and Function | development                   | development of B lymphocytes                   | 1,06E-06 | EBF1, IL7, IL2RG, IL7R, JAK3, MYB (includes EG:4602), NOTCH2, TCF4, TNFSF13B, VAV1                                                                                                                                                                                                                                                                                                                                                                                                              | 10 |
| Hematological System Development              | hematopoiesis                 | hematopoiesis                                  | 5,09E-38 | AHR, ANXA1, ATM, BCL11A, BCL11B, BCL2A1, CASP1, CCL5, CCR2, CCR5, CCR7, CD2, CD28, CD44, CD47, CD74, CD247, CD3D, CD8A, CIITA, CSF1R, CSF2RB, DEF6, EBF1, EOMES, ETS1, ETV6, FCGR2A, FCGR2B, GFI1, GZMA,                                                                                                                                                                                                                                                                                        | 76 |



|                                                             |                           |                                                      |              |                                                                                                                                                                                                                                                                                                                                                                                                                                                                                                                                                             |    |
|-------------------------------------------------------------|---------------------------|------------------------------------------------------|--------------|-------------------------------------------------------------------------------------------------------------------------------------------------------------------------------------------------------------------------------------------------------------------------------------------------------------------------------------------------------------------------------------------------------------------------------------------------------------------------------------------------------------------------------------------------------------|----|
| nt and<br>Function                                          |                           |                                                      |              | GZMB, HHEX, HLA-C, HLA-DOA, HLA-DQB1, IKZF1, IL7, IL10RA, IL2RB, IL2RG, IL7R, IRF1, IRF4, IRF8, ITGAL, ITGB2, ITK, JAK3, LCK, LCP2, LEF1, MAP4K1, MYB (includes EG:4602), NFAM1, NFATC2, NOTCH2, PRF1, PTPN22, PTPRC, RAC2, RASGRP4, RASSF5, RUNX1, RUNX2, SH2B3, SH2D1A, SIT1, STAT4, TBX21, TCF4, TGFB2, THBS2, TNFSF13B, VAV1, WIPF1                                                                                                                                                                                                                     |    |
| Hematologi<br>cal System<br>Developme<br>nt and<br>Function | hematopoi<br>esis         | hematopoie<br>sis of cells                           | 3,07E-<br>07 | ATM, CCR2, CD44, EBF1, ETV6, HHEX, IKZF1, IL7, JAK3, NOTCH2, RUNX1, SH2B3                                                                                                                                                                                                                                                                                                                                                                                                                                                                                   | 12 |
| Hematologi<br>cal System<br>Developme<br>nt and<br>Function | hematologi<br>cal process | hematologic<br>al process                            | 9,48E-<br>36 | AHR, ANXA1, ATM, BCL11A, BCL11B, BCL2A1, CASP1, CCL5, CCR2, CCR5, CCR7, CD2, CD28, CD44, CD47, CD74, CD247, CD3D, CD8A, CIITA, CLU, CSF1R, CSF2RB, DEF6, EBF1, EOMES, ETS1, ETV6, FCGR2A, FCGR2B, FLI1, GFI1, GZMA, GZMB, HHEX, HLA-C, HLA-DOA, HLA-DQB1, IKZF1, IL7, IL10RA, IL2RB, IL2RG, IL7R, IRF1, IRF4, IRF8, ITGAL, ITGB2, ITK, JAK3, LCK, LCP2, LEF1, MAP4K1, MYB (includes EG:4602), NFAM1, NFATC2, NOTCH2, PRF1, PTPN22, PTPRC, RAC2, RASGRP4, RASSF5, RUNX1, RUNX2, SH2B3, SH2D1A, SIT1, STAT4, TBX21, TCF4, TGFB2, THBS2, TNFSF13B, VAV1, WIPF1 | 78 |
| Hematologi<br>cal System<br>Developme<br>nt and<br>Function | differentiati<br>on       | differentiati<br>on of blood<br>cells                | 3,36E-<br>33 | AHR, ANXA1, ATM, BCL11A, BCL2A1, CD2, CD28, CD47, CD74, CD300A, CD3D, CD8A, CSF1R, CSF2RB, DEF6, EBF1, ETS1, ETV6, FCGR2B, FLI1, GFI1, HCLS1, HHEX, HLA-C, HLA-DOA, IKZF1, IL7, IL2RB, IL2RG, IL7R, IRF1, IRF4, IRF8, ITGAL, ITGAM, ITGB2, ITGB6, ITK, JAK3, LCK, LCP2, LEF1, MAP4K1, MYB (includes EG:4602), NFAM1, NFATC2, PTPN22, PTPRC, RASGRP4, RASSF5, RUNX1, RUNX2, SH2D1A, SIT1, STAT4, TBX21, TGFB2, THBS2, TNFSF13B, VAV1, WIPF1                                                                                                                  | 61 |
| Hematologi<br>cal System<br>Developme<br>nt and<br>Function | differentiati<br>on       | differentiati<br>on of<br>leukocytes                 | 1,01E-<br>30 | AHR, ANXA1, ATM, BCL11A, BCL2A1, CD2, CD28, CD47, CD74, CD300A, CD3D, CD8A, CSF1R, CSF2RB, DEF6, EBF1, ETS1, FCGR2B, GFI1, HLA-C, HLA-DOA, IKZF1, IL7, IL2RB, IL2RG, IL7R, IRF1, IRF4, IRF8, ITGAL, ITGAM, ITGB2, ITGB6, ITK, JAK3, LCK, LCP2, LEF1, MYB (includes EG:4602), NFAM1, NFATC2, PTPN22, PTPRC, RASGRP4, RASSF5, RUNX1, RUNX2, SH2D1A, SIT1, STAT4, TBX21, TGFB2, TNFSF13B, VAV1, WIPF1                                                                                                                                                          | 55 |
| Hematologi<br>cal System<br>Developme<br>nt and<br>Function | differentiati<br>on       | differentiati<br>on of T<br>lymphocytes              | 1,50E-<br>28 | AHR, ANXA1, ATM, BCL11A, BCL2A1, CD2, CD28, CD74, CD8A, DEF6, ETS1, FCGR2B, HLA-C, HLA-DOA, IKZF1, IL7, IL2RB, IL2RG, IL7R, IRF1, IRF4, IRF8, ITGAL, ITGB2, ITK, JAK3, LCK, LCP2, LEF1, MYB (includes EG:4602), NFATC2, PTPN22, PTPRC, RASSF5, RUNX1, SH2D1A, STAT4, TBX21, TGFB2, TNFSF13B, VAV1, WIPF1                                                                                                                                                                                                                                                    | 42 |
| Hematologi<br>cal System<br>Developme<br>nt and<br>Function | differentiati<br>on       | differentiati<br>on of<br>lymphocytes                | 1,06E-<br>27 | AHR, ANXA1, ATM, BCL11A, BCL2A1, CD2, CD28, CD74, CD3D, CD8A, DEF6, EBF1, ETS1, FCGR2B, HLA-C, HLA-DOA, IKZF1, IL7, IL2RB, IL2RG, IL7R, IRF1, IRF4, IRF8, ITGAL, ITGB2, ITK, JAK3, LCK, LCP2, LEF1, MYB (includes EG:4602), NFAM1, NFATC2, PTPN22, PTPRC, RASSF5, RUNX1, SH2D1A, SIT1, STAT4, TBX21, TGFB2, TNFSF13B, VAV1, WIPF1                                                                                                                                                                                                                           | 46 |
| Hematologi<br>cal System<br>Developme<br>nt and<br>Function | differentiati<br>on       | differentiati<br>on of<br>mononuclea<br>r leukocytes | 5,62E-<br>27 | AHR, ANXA1, ATM, BCL11A, BCL2A1, CD2, CD28, CD74, CD3D, CD8A, CSF1R, DEF6, EBF1, ETS1, FCGR2B, HLA-C, HLA-DOA, IKZF1, IL7, IL2RB, IL2RG, IL7R, IRF1, IRF4, IRF8, ITGAL, ITGB2, ITK, JAK3, LCK, LCP2, LEF1, MYB (includes EG:4602), NFAM1, NFATC2, PTPN22, PTPRC, RASSF5, RUNX1, SH2D1A, SIT1, STAT4, TBX21, TGFB2, TNFSF13B, VAV1, WIPF1                                                                                                                                                                                                                    | 47 |
| Hematologi<br>cal System<br>Developme<br>nt and<br>Function | differentiati<br>on       | differentiati<br>on of helper<br>T<br>lymphocytes    | 6,25E-<br>15 | AHR, ANXA1, CD28, ETS1, IL7, IL2RB, IRF1, IRF8, ITGAL, ITGB2, ITK, JAK3, NFATC2, RUNX1, SH2D1A, STAT4, TBX21, TGFB2, TNFSF13B, VAV1                                                                                                                                                                                                                                                                                                                                                                                                                         | 20 |
| Hematologi<br>cal System<br>Developme<br>nt and<br>Function | differentiati<br>on       | differentiati<br>on of Th2<br>cells                  | 1,44E-<br>08 | CD28, IRF1, ITK, JAK3, NFATC2, RUNX1, SH2D1A, STAT4, TBX21, VAV1                                                                                                                                                                                                                                                                                                                                                                                                                                                                                            | 10 |
| Hematologi<br>cal System<br>Developme<br>nt and<br>Function | differentiati<br>on       | differentiati<br>on of<br>hematopoi<br>etic cells    | 1,77E-<br>08 | CSF1R, ETV6, FLI1, GFI1, HHEX, IKZF1, IL7, IRF8, JAK3, MYB (includes EG:4602), RUNX1, RUNX2, THBS2                                                                                                                                                                                                                                                                                                                                                                                                                                                          | 13 |
| Hematologi<br>cal System                                    | differentiati<br>on       | differentiati<br>on of                               | 3,47E-<br>07 | CSF1R, FLI1, GFI1, HHEX, IKZF1, IL7, IRF8, MYB (includes EG:4602), RUNX1, RUNX2, THBS2                                                                                                                                                                                                                                                                                                                                                                                                                                                                      | 11 |

|                                               |                 |                                           |          |                                                                                                                                                                                                                                                                                                                                                                                                                                |    |
|-----------------------------------------------|-----------------|-------------------------------------------|----------|--------------------------------------------------------------------------------------------------------------------------------------------------------------------------------------------------------------------------------------------------------------------------------------------------------------------------------------------------------------------------------------------------------------------------------|----|
| Development and Function                      |                 | hematopoietic progenitor cells            |          |                                                                                                                                                                                                                                                                                                                                                                                                                                |    |
| Hematological System Development and Function | differentiation | differentiation of B lymphocytes          | 1,56E-06 | BCL11A, CD74, EBF1, IKZF1, IL7, IL2RB, IL2RG, IL7R, IRF4, NFAM1, PTPRC, TNFSF13B                                                                                                                                                                                                                                                                                                                                               | 12 |
| Hematological System Development and Function | differentiation | differentiation of thymocytes             | 5,92E-06 | CD2, CD28, FCGR2B, IKZF1, IL2RG, LCP2, MYB (includes EG:4602)                                                                                                                                                                                                                                                                                                                                                                  | 7  |
| Hematological System Development and Function | differentiation | differentiation of Th1 cells              | 1,21E-05 | ANXA1, IRF1, IRF8, ITGAL, ITGB2, JAK3, STAT4, TBX21                                                                                                                                                                                                                                                                                                                                                                            | 8  |
| Hematological System Development and Function | quantity        | quantity of leukocytes                    | 2,16E-32 | AHR, ATM, BCL2A1, CCL5, CCR2, CCR7, CD28, CD47, CD247, CD3D, CD8A, CIITA, CNN2, CSF1R, CSF2RB, CTSS, CYTIP, DEF6, ETS1, ETV6, FCGR2A, FLI1, GFI1, IKZF1, IL7, IL10RA, IL2RB, IL2RG, IL7R, IRF1, IRF4, IRF8, ITGAM, ITGB2, ITGB6, ITK, JAK3, LCK, LCP2, LTB4R, NFATC2, NOTCH2, PRF1, PTPRC, RAC2, RUNX1, RUNX2, SELL, SELPLG, SH2B3, SIT1, SLA, STAT4, TAP1, TBX21, TCF4, TGFBR2, TNFSF13B, VAV1                                | 59 |
| Hematological System Development and Function | quantity        | quantity of blood cells                   | 6,22E-32 | AHR, ATM, BCL2A1, CCL5, CCR2, CCR7, CD28, CD47, CD247, CD3D, CD8A, CIITA, CNN2, CSF1R, CSF2RB, CTSS, CYTIP, DEF6, ETS1, ETV6, FCGR2A, FLI1, GFI1, IKZF1, IL7, IL10RA, IL2RB, IL2RG, IL7R, IRF1, IRF4, IRF8, ITGAM, ITGB2, ITGB6, ITK, JAK3, LCK, LCP2, LTB4R, MYB (includes EG:4602), NFATC2, NOTCH2, PRF1, PTPRC, RAC2, RUNX1, RUNX2, SELL, SELPLG, SH2B3, SIT1, SLA, STAT4, TAP1, TBX21, TCF4, TGFBR2, THBS2, TNFSF13B, VAV1 | 61 |
| Hematological System Development and Function | quantity        | quantity of mononuclear leukocytes        | 1,30E-31 | AHR, ATM, BCL2A1, CCR2, CCR7, CD28, CD247, CD3D, CIITA, CNN2, CSF2RB, CTSS, CYTIP, DEF6, ETS1, ETV6, FCGR2A, FLI1, GFI1, IKZF1, IL7, IL10RA, IL2RB, IL2RG, IL7R, IRF1, ITGAM, ITGB2, ITGB6, ITK, JAK3, LCK, LCP2, NFATC2, NOTCH2, PRF1, PTPRC, RAC2, RUNX1, RUNX2, SELL, SELPLG, SH2B3, SIT1, SLA, STAT4, TAP1, TBX21, TCF4, TGFBR2, TNFSF13B, VAV1                                                                            | 52 |
| Hematological System Development and Function | quantity        | quantity of lymphocytes                   | 1,51E-31 | AHR, ATM, BCL2A1, CCR2, CCR7, CD28, CD247, CD3D, CIITA, CSF2RB, CTSS, CYTIP, DEF6, ETS1, ETV6, FCGR2A, FLI1, GFI1, IKZF1, IL7, IL10RA, IL2RB, IL2RG, IL7R, IRF1, ITGAM, ITGB2, ITGB6, ITK, JAK3, LCK, LCP2, NFATC2, NOTCH2, PRF1, PTPRC, RAC2, RUNX1, RUNX2, SELL, SELPLG, SH2B3, SIT1, SLA, STAT4, TAP1, TBX21, TCF4, TGFBR2, TNFSF13B, VAV1                                                                                  | 51 |
| Hematological System Development and Function | quantity        | quantity of T lymphocytes                 | 6,66E-27 | AHR, ATM, BCL2A1, CCR2, CCR7, CD28, CD247, CD3D, CIITA, CSF2RB, CTSS, DEF6, ETS1, ETV6, FLI1, GFI1, IKZF1, IL7, IL10RA, IL2RB, IL2RG, IL7R, IRF1, ITGAM, ITGB2, ITK, JAK3, LCK, LCP2, PTPRC, RUNX1, RUNX2, SELPLG, SH2B3, SIT1, TAP1, TBX21, TGFBR2, TNFSF13B, VAV1                                                                                                                                                            | 40 |
| Hematological System Development and Function | quantity        | quantity of B lymphocytes                 | 2,44E-11 | AHR, BCL2A1, CCR7, CD28, FCGR2A, IL7, IL2RG, IL7R, ITGB2, JAK3, NFATC2, NOTCH2, RAC2, SH2B3, SLA, TCF4, TGFBR2, TNFSF13B, VAV1                                                                                                                                                                                                                                                                                                 | 19 |
| Hematological System Development and Function | quantity        | quantity of natural killer T lymphocytes  | 8,25E-11 | CSF2RB, ETS1, IKZF1, IL2RB, IL2RG, PTPRC, TBX21, TGFBR2, VAV1                                                                                                                                                                                                                                                                                                                                                                  | 9  |
| Hematological System Development and Function | quantity        | quantity of intraepithelial T lymphocytes | 2,82E-09 | IKZF1, IL2RG, IL7R, IRF1, PTPRC, TAP1                                                                                                                                                                                                                                                                                                                                                                                          | 6  |
| Hematological System Development              | quantity        | quantity of thymocytes                    | 5,97E-08 | ATM, CCR7, CD247, ETS1, IL7, IL2RG, IL7R, ITK, JAK3, LCK, LCP2, RUNX1                                                                                                                                                                                                                                                                                                                                                          | 12 |

|                                                             |                   |                                                      |              |                                                                                                                                                                                                                                                                                                                                                                                                                              |    |
|-------------------------------------------------------------|-------------------|------------------------------------------------------|--------------|------------------------------------------------------------------------------------------------------------------------------------------------------------------------------------------------------------------------------------------------------------------------------------------------------------------------------------------------------------------------------------------------------------------------------|----|
| nt and<br>Function                                          |                   |                                                      |              |                                                                                                                                                                                                                                                                                                                                                                                                                              |    |
| Hematologi<br>cal System<br>Developme<br>nt and<br>Function | quantity          | quantity of<br>antigen<br>presenting<br>cells        | 1,22E-<br>07 | CCR2, CCR7, CD47, CSF1R, CTSS, IKZF1, IRF1, IRF4, IRF8, ITGB2, ITGB6,<br>SELPLG, SH2B3, STAT4                                                                                                                                                                                                                                                                                                                                | 14 |
| Hematologi<br>cal System<br>Developme<br>nt and<br>Function | quantity          | quantity of<br>myeloid cells                         | 2,13E-<br>07 | AHR, CD8A, CNN2, CSF2RB, FLI1, IKZF1, IRF8, ITGB2, JAK3, RAC2, SELL,<br>SELPLG, SH2B3, STAT4                                                                                                                                                                                                                                                                                                                                 | 14 |
| Hematologi<br>cal System<br>Developme<br>nt and<br>Function | quantity          | quantity of<br>natural killer<br>cells               | 2,46E-<br>07 | ETS1, IL2RB, IL2RG, IRF1, JAK3, PRF1, PTPRC, TBX21                                                                                                                                                                                                                                                                                                                                                                           | 8  |
| Hematologi<br>cal System<br>Developme<br>nt and<br>Function | quantity          | quantity of<br>granulocytes                          | 3,16E-<br>07 | AHR, CD8A, CNN2, CSF2RB, FLI1, IRF8, ITGB2, JAK3, RAC2, SELL, SELPLG,<br>SH2B3, STAT4                                                                                                                                                                                                                                                                                                                                        | 13 |
| Hematologi<br>cal System<br>Developme<br>nt and<br>Function | quantity          | quantity of<br>pre-B<br>lymphocytes                  | 1,23E-<br>06 | CD28, IL7, IL2RG, IL7R, SH2B3, TCF4, TNFSF13B                                                                                                                                                                                                                                                                                                                                                                                | 7  |
| Hematologi<br>cal System<br>Developme<br>nt and<br>Function | quantity          | quantity of<br>dendritic<br>cells                    | 2,13E-<br>06 | CCR2, CCR7, CD47, IKZF1, IRF1, IRF4, IRF8, ITGB2                                                                                                                                                                                                                                                                                                                                                                             | 8  |
| Hematologi<br>cal System<br>Developme<br>nt and<br>Function | quantity          | quantity of<br>hematopoi<br>etic progenitor<br>cells | 2,87E-<br>06 | FLI1, IKZF1, IRF8, JAK3, MYB (includes EG:4602), RUNX1, SH2B3, STAT4,<br>THBS2                                                                                                                                                                                                                                                                                                                                               | 9  |
| Hematologi<br>cal System<br>Developme<br>nt and<br>Function | quantity          | quantity of<br>phagocytes                            | 4,80E-<br>06 | AHR, CCR2, CNN2, CSF1R, CTSS, ITGB2, ITGB6, JAK3, RAC2, SELL, SELPLG,<br>SH2B3, STAT4                                                                                                                                                                                                                                                                                                                                        | 13 |
| Hematologi<br>cal System<br>Developme<br>nt and<br>Function | quantity          | quantity of<br>pro-B<br>lymphocytes                  | 1,52E-<br>05 | CD28, IL7, IL2RG, IL7R, TCF4                                                                                                                                                                                                                                                                                                                                                                                                 | 5  |
| Hematologi<br>cal System<br>Developme<br>nt and<br>Function | proliferatio<br>n | proliferation<br>of<br>mononuclea<br>r leukocytes    | 4,96E-<br>29 | ANXA1, ATM, CCND2, CCR2, CCR5, CD2, CD28, CD44, CD47, CD48, CD74,<br>CD84, CD209, CD247, CD8A, CSF1R, CSF2RB, DEF6, DGKA, FCGR2B, FYB,<br>GFI1, HCK, HLA-DRB1, IKZF1, IL7, IL2RB, IL2RG, IL7R, IRF1, IRF4, IRF8,<br>ITGAL, ITGAM, ITGAX, ITGB2, ITK, JAK3, KLRK1, LCK, LCP2, LEF1, MYB<br>(includes EG:4602), NFATC2, PRKCB, PTPRC, RAC2, SASH3, SH2B3,<br>SH2D1A, SLAMF7, STAT4, TGFB2, TNFSF13B, TRD@, VAV1, WIPF1         | 57 |
| Hematologi<br>cal System<br>Developme<br>nt and<br>Function | proliferatio<br>n | proliferation<br>of<br>leukocytes                    | 1,01E-<br>28 | ANXA1, ATM, CCND2, CCR2, CCR5, CD2, CD28, CD44, CD47, CD48, CD74,<br>CD84, CD209, CD247, CD8A, CSF1R, CSF2RB, DEF6, DGKA, FCGR2B, FYB,<br>GFI1, HCK, HLA-DRB1, IKZF1, IL7, IL10RA, IL2RB, IL2RG, IL7R, IRF1, IRF4,<br>IRF8, ITGAL, ITGAM, ITGAX, ITGB2, ITK, JAK3, KLRK1, LCK, LCP2, LEF1, MYB<br>(includes EG:4602), NFATC2, PRKCB, PTPRC, RAC2, SASH3, SH2B3,<br>SH2D1A, SLAMF7, STAT4, TGFB2, TNFSF13B, TRD@, VAV1, WIPF1 | 58 |
| Hematologi<br>cal System<br>Developme<br>nt and<br>Function | proliferatio<br>n | proliferation<br>of<br>lymphocytes                   | 3,49E-<br>28 | ANXA1, ATM, CCND2, CCR2, CCR5, CD2, CD28, CD44, CD47, CD48, CD74,<br>CD84, CD209, CD247, CD8A, CSF2RB, DEF6, DGKA, FCGR2B, FYB, GFI1,<br>HCK, HLA-DRB1, IKZF1, IL7, IL2RB, IL2RG, IL7R, IRF1, IRF4, IRF8, ITGAL,<br>ITGAM, ITGAX, ITGB2, ITK, JAK3, KLRK1, LCK, LCP2, LEF1, MYB (includes<br>EG:4602), NFATC2, PRKCB, PTPRC, RAC2, SASH3, SH2B3, SH2D1A, SLAMF7,<br>STAT4, TGFB2, TNFSF13B, TRD@, VAV1, WIPF1                | 56 |

|                                               |               |                                        |          |                                                                                                                                                                                                                                                                                                                                                                 |    |
|-----------------------------------------------|---------------|----------------------------------------|----------|-----------------------------------------------------------------------------------------------------------------------------------------------------------------------------------------------------------------------------------------------------------------------------------------------------------------------------------------------------------------|----|
| Hematological System Development and Function | proliferation | proliferation of T lymphocytes         | 1,06E-23 | ANXA1, ATM, CCR2, CCR5, CD2, CD28, CD44, CD47, CD48, CD74, CD84, CD209, CD247, CD8A, CSF2RB, DEF6, DGKA, FYB, GFI1, HLA-DRB1, IKZF1, IL7, IL2RB, IL2RG, IL7R, ITGAL, ITGAM, ITGAX, ITGB2, ITK, JAK3, KLRK1, LCK, LCP2, MYB (includes EG:4602), NFATC2, PTPRC, RAC2, SASH3, SH2D1A, STAT4, TGFB2, TNFSF13B, TRD@, VAV1, WIPF1                                    | 46 |
| Hematological System Development and Function | proliferation | proliferation of B lymphocytes         | 1,01E-11 | CCND2, CD44, CD74, CD8A, FCGR2B, HCK, IL7, IL2RG, IL7R, IRF4, IRF8, LEF1, NFATC2, PRKCB, PTPRC, SASH3, SH2B3, SLAMF7, TNFSF13B, VAV1, WIPF1                                                                                                                                                                                                                     | 21 |
| Hematological System Development and Function | proliferation | proliferation of leukocyte cell lines  | 8,85E-11 | CD28, CD44, CD8A, CLEC7A, CSF1R, CSF2RB, ETV6, HCK, IL7, IL10RA, IL2RB, IL2RG, IL7R, JAK3, MYB (includes EG:4602), PTPRC, RASGRP4, RUNX1, SH2B3                                                                                                                                                                                                                 | 19 |
| Hematological System Development and Function | proliferation | proliferation of naive lymphocytes     | 8,13E-07 | CD28, DEF6, IL7, ITGAL, ITGB2, KLRK1, SLAMF7                                                                                                                                                                                                                                                                                                                    | 7  |
| Hematological System Development and Function | proliferation | proliferation of naive T lymphocytes   | 4,97E-06 | CD28, DEF6, IL7, ITGAL, ITGB2, KLRK1                                                                                                                                                                                                                                                                                                                            | 6  |
| Hematological System Development and Function | proliferation | proliferation of thymocytes            | 1,67E-05 | CD2, CD28, IL7, IL2RG, ITK, JAK3, LCP2, MYB (includes EG:4602)                                                                                                                                                                                                                                                                                                  | 8  |
| Hematological System Development and Function | activation    | activation of leukocytes               | 2,13E-26 | ANXA1, CCL5, CCR2, CD2, CD28, CD44, CD47, CD48, CD74, CD209, CD247, CD1C, CD300A, CD8A, CLEC7A, CSF1R, CXCL9, DEF6, FCGR2A, FCGR2B, FYB, GFI1, GZMA, GZMB, HCK, HLA-C, HLA-DMB, HLA-DOA, HLA-DQB1, HLA-DRA, HLA-DRB1, IL7, IL2RB, ITGAL, ITGAM, ITGB2, ITGB6, ITK, JAK3, KLRK1, LCK, LCP2, NFATC2, PRF1, PTPRC, SELL, SIRPG, SIT1, STAT4, TBX21, TNFSF13B, VAV1 | 52 |
| Hematological System Development and Function | activation    | activation of lymphocytes              | 1,59E-19 | CCL5, CCR2, CD2, CD28, CD44, CD47, CD48, CD209, CD247, CD1C, CD8A, CLEC7A, DEF6, FCGR2A, FCGR2B, GFI1, GZMA, GZMB, HLA-DRA, HLA-DRB1, IL7, IL2RB, ITGAL, ITGB2, ITK, JAK3, KLRK1, LCK, NFATC2, PRF1, PTPRC, SIRPG, SIT1, STAT4, TBX21, TNFSF13B, VAV1                                                                                                           | 37 |
| Hematological System Development and Function | activation    | activation of T lymphocytes            | 7,00E-19 | CCL5, CCR2, CD2, CD28, CD44, CD47, CD48, CD209, CD247, CD8A, CLEC7A, DEF6, GFI1, GZMA, GZMB, HLA-DRA, HLA-DRB1, IL7, IL2RB, ITGAL, ITGB2, ITK, JAK3, LCK, NFATC2, PRF1, PTPRC, SIRPG, SIT1, STAT4, TBX21, VAV1                                                                                                                                                  | 32 |
| Hematological System Development and Function | activation    | activation of mast cells               | 4,95E-08 | CCL5, CCR2, CD48, CD300A, FCGR2A, FCGR2B, FYB, ITGAM, LCP2                                                                                                                                                                                                                                                                                                      | 9  |
| Hematological System Development and Function | activation    | activation of natural killer cells     | 4,75E-07 | CCL5, CD2, CD28, CD44, FCGR2A, IL2RB, ITGAL, ITGB2, KLRK1, PRF1, STAT4                                                                                                                                                                                                                                                                                          | 11 |
| Hematological System Development and Function | activation    | activation of antigen presenting cells | 5,10E-06 | CCL5, CD74, CD209, CSF1R, FCGR2A, HCK, HLA-C, HLA-DMB, HLA-DOA, HLA-DQB1, IL7, ITGB6, STAT4                                                                                                                                                                                                                                                                     | 13 |
| Hematological System Development and Function | binding       | binding of leukocytes                  | 3,45E-18 | CCL5, CCR5, CD2, CD44, CD47, CD48, CD209, CXCL9, FCGR2A, FCGR2B, FYB, HCK, IL7, ITGAL, ITGAM, ITGAX, ITGB2, ITK, KLRK1, LCK, LCP2, MRC1, NFATC2, PTPRC, SELL, SELPLG                                                                                                                                                                                            | 26 |

| Function                                      |            |                                                    |          |                                                                                                                                                                                       |    |
|-----------------------------------------------|------------|----------------------------------------------------|----------|---------------------------------------------------------------------------------------------------------------------------------------------------------------------------------------|----|
| Hematological System Development and Function | binding    | binding of mononuclear leukocytes                  | 3,00E-14 | CCL5, CCR5, CD2, CD44, CD47, CXCL9, FYB, IL7, ITGAL, ITGAM, ITGB2, ITK, KLRK1, LCK, LCP2, NFATC2, SELL, SELPLG                                                                        | 18 |
| Hematological System Development and Function | binding    | binding of lymphocytes                             | 3,03E-13 | CCL5, CD2, CD44, CD47, CXCL9, FYB, IL7, ITGAL, ITGB2, ITK, KLRK1, LCK, LCP2, NFATC2, SELL, SELPLG                                                                                     | 16 |
| Hematological System Development and Function | binding    | binding of T lymphocytes                           | 2,04E-11 | CCL5, CD2, CD47, CXCL9, FYB, IL7, ITGAL, ITGB2, ITK, KLRK1, LCK, LCP2, SELPLG                                                                                                         | 13 |
| Hematological System Development and Function | binding    | binding of phagocytes                              | 2,27E-07 | CD2, CD209, FCGR2A, HCK, ITGAL, ITGAM, ITGB2, PTPRC, SELL, SELPLG                                                                                                                     | 10 |
| Hematological System Development and Function | binding    | binding of peripheral blood leukocytes             | 3,97E-06 | CCR5, ITGAM, ITGB2, LCP2                                                                                                                                                              | 4  |
| Hematological System Development and Function | binding    | binding of antigen presenting cells                | 1,22E-05 | CD2, CD209, FYB, ITGAL, LCK, MRC1, PTPRC                                                                                                                                              | 7  |
| Hematological System Development and Function | binding    | binding of peripheral blood mononuclear leukocytes | 1,52E-05 | CCR5, ITGAM, ITGB2                                                                                                                                                                    | 3  |
| Hematological System Development and Function | cell death | cell death of T lymphocytes                        | 5,27E-17 | ATM, BCL2A1, CASP1, CCL5, CCR5, CD2, CD28, CD44, CD47, CD247, CIITA, DEF6, EOMES, GFI1, GZMA, GZMB, IL7, IL2RG, IL7R, ITK, JAK3, LCK, MAP4K1, PRF1, PTPRC, RAC2, TBX21, TGFBR2, THBS2 | 29 |
| Hematological System Development and Function | cell death | cell death of thymocytes                           | 7,66E-06 | ATM, BCL2A1, CASP1, CD28, CD44, GFI1, GZMA, GZMB, IL7, PTPRC                                                                                                                          | 10 |
| Hematological System Development and Function | adhesion   | adhesion of leukocytes                             | 5,52E-17 | ANXA1, CCL5, CD2, CD28, CD44, CD47, CD48, CD209, CXCL9, FCGR2A, FYB, HCK, IL7, ITGAL, ITGAM, ITGAX, ITGB2, ITK, LCP1, LTB4R, PTPRC, RAC2, RASSF5, SELL, SELPLG, TGFBR2, THBS2, VAV1   | 28 |
| Hematological System Development and Function | adhesion   | adhesion of mononuclear leukocytes                 | 1,06E-16 | CCL5, CD2, CD28, CD44, CD47, CD48, CD209, CXCL9, FYB, IL7, ITGAL, ITGAM, ITGAX, ITGB2, ITK, LCP1, RASSF5, SELL, SELPLG, TGFBR2, THBS2, VAV1                                           | 22 |
| Hematological System Development and Function | adhesion   | adhesion of T lymphocytes                          | 1,51E-12 | CD2, CD44, CD47, CD48, CD209, CXCL9, FYB, IL7, ITGAL, ITGB2, ITK, RASSF5, SELL, SELPLG, THBS2                                                                                         | 15 |
| Hematological System Development and Function | adhesion   | adhesion of lymphocytes                            | 5,56E-12 | CD2, CD28, CD44, CD47, CD48, CD209, CXCL9, FYB, IL7, ITGAL, ITGB2, ITK, RASSF5, SELL, SELPLG, THBS2                                                                                   | 16 |

| Function                                      |               |                                         |          |                                                                                                                                                                                                                                                |    |
|-----------------------------------------------|---------------|-----------------------------------------|----------|------------------------------------------------------------------------------------------------------------------------------------------------------------------------------------------------------------------------------------------------|----|
| Hematological System Development and Function | adhesion      | adhesion of neutrophils                 | 6,75E-09 | ANXA1, CD44, ITGAL, ITGAM, ITGAX, ITGB2, LCP1, SELL, SELPLG, VAV1                                                                                                                                                                              | 10 |
| Hematological System Development and Function | adhesion      | adhesion of granulocytes                | 2,67E-08 | ANXA1, CD44, HCK, ITGAL, ITGAM, ITGAX, ITGB2, LCP1, SELL, SELPLG, VAV1                                                                                                                                                                         | 11 |
| Hematological System Development and Function | adhesion      | adhesion of antigen presenting cells    | 4,14E-07 | CD2, CD44, CD48, CD209, ITGAL, ITGAM, ITGB2                                                                                                                                                                                                    | 7  |
| Hematological System Development and Function | adhesion      | adhesion of monocytes                   | 5,07E-06 | CCL5, ITGAM, ITGAX, ITGB2, LCP1, TGFBR2, VAV1                                                                                                                                                                                                  | 7  |
| Hematological System Development and Function | adhesion      | adhesion of dendritic cells             | 7,05E-06 | CD44, CD209, ITGAL, ITGAM                                                                                                                                                                                                                      | 4  |
| Hematological System Development and Function | adhesion      | adhesion of leukocyte cell lines        | 1,32E-05 | ANXA1, GF11, ITGAL, ITGAM, ITGB2, SELL                                                                                                                                                                                                         | 6  |
| Hematological System Development and Function | interaction   | interaction of T lymphocytes            | 8,46E-16 | CCL5, CCR5, CCR7, CD2, CD28, CD47, CD209, CXCL9, FYB, IL7, ITGAL, ITGB2, ITK, KLRK1, LCK, LCP2, NRP1, SELPLG                                                                                                                                   | 18 |
| Hematological System Development and Function | apoptosis     | apoptosis of T lymphocytes              | 7,02E-15 | ATM, BCL2A1, CASP1, CCL5, CCR5, CD2, CD28, CD44, CD47, CD247, CIITA, GF11, GZMA, GZMB, IL7, IL2RG, IL7R, ITK, JAK3, LCK, MAP4K1, PRF1, PTPRC, RAC2, THBS2                                                                                      | 25 |
| Hematological System Development and Function | cell movement | cell movement of leukocytes             | 1,10E-13 | ANXA1, CASP1, CCL5, CCR2, CCR5, CCR7, CD2, CD28, CD44, CD47, CD48, CD209, CSF1R, CTSS, CXCL9, CXCL16, FCGR2A, FCGR2B, HCK, IL2RB, ITGAL, ITGAM, ITGAX, ITGB2, ITK, LTB4R, NFATC2, PRF1, PRKCB, PTPRC, RAC2, SELL, SELPLG, TGFBR2, THBS2, TIMP2 | 36 |
| Hematological System Development and Function | cell movement | cell movement of myeloid cells          | 9,23E-12 | ANXA1, CASP1, CCL5, CCR2, CD2, CD28, CD44, CD47, CD48, CXCL9, FCGR2A, HCK, IL2RB, ITGAL, ITGAM, ITGAX, ITGB2, ITK, LTB4R, PTPRC, RAC2, SELL, SELPLG, TGFBR2                                                                                    | 24 |
| Hematological System Development and Function | cell movement | cell movement of granulocytes           | 5,64E-11 | ANXA1, CASP1, CCL5, CCR2, CD2, CD28, CD44, CD47, CD48, CXCL9, FCGR2A, HCK, IL2RB, ITGAL, ITGAM, ITGAX, ITGB2, ITK, LTB4R, RAC2, SELL, SELPLG, TGFBR2                                                                                           | 23 |
| Hematological System Development and Function | cell movement | cell movement of mononuclear leukocytes | 1,34E-10 | ANXA1, CCL5, CCR2, CCR5, CCR7, CD28, CD44, CD47, CTSS, CXCL9, CXCL16, ITGAL, ITGAX, ITGB2, ITK, NFATC2, PRF1, PRKCB, RAC2, SELL, SELPLG, THBS2, TIMP2                                                                                          | 23 |
| Hematological System Development and Function | cell movement | cell movement of phagocytes             | 4,29E-09 | ANXA1, CASP1, CCL5, CCR2, CCR5, CD28, CD44, CD47, CSF1R, CXCL9, FCGR2A, HCK, ITGAL, ITGAM, ITGAX, ITGB2, LTB4R, RAC2, SELL, SELPLG, TGFBR2                                                                                                     | 21 |

| Function                                      |               |                                         |          |                                                                                                                                       |    |
|-----------------------------------------------|---------------|-----------------------------------------|----------|---------------------------------------------------------------------------------------------------------------------------------------|----|
| Hematological System Development and Function | cell movement | cell movement of neutrophils            | 5,75E-09 | ANXA1, CASP1, CCL5, CCR2, CD28, CD44, CD47, FCGR2A, HCK, ITGAL, ITGAM, ITGAX, ITGB2, LTB4R, RAC2, SELL, SELPLG, TGFBR2                | 18 |
| Hematological System Development and Function | cell movement | cell movement of T lymphocytes          | 1,12E-07 | CCL5, CCR2, CCR5, CCR7, CD28, CD44, CXCL9, CXCL16, ITGB2, ITK, PRF1, SELL, SELPLG, THBS2                                              | 14 |
| Hematological System Development and Function | cell movement | cell movement of lymphocytes            | 5,42E-07 | CCL5, CCR2, CCR5, CCR7, CD28, CD44, CXCL9, CXCL16, ITGB2, ITK, NFATC2, PRF1, RAC2, SELL, SELPLG, THBS2                                | 16 |
| Hematological System Development and Function | cell movement | cell movement of eosinophils            | 9,47E-07 | CCL5, CD2, CD47, CD48, CXCL9, IL2RB, ITGAL, ITGAM, ITGB2, ITK                                                                         | 10 |
| Hematological System Development and Function | cell movement | cell movement of monocytes              | 2,11E-06 | ANXA1, CCL5, CCR2, CD47, CTSS, CXCL9, ITGAL, ITGAX, ITGB2, PRKCB, TIMP2                                                               | 11 |
| Hematological System Development and Function | cell movement | cell movement of memory T lymphocytes   | 6,67E-06 | CCL5, CCR7, CD28, CXCL9, ITGB2                                                                                                        | 5  |
| Hematological System Development and Function | recruitment   | recruitment of leukocytes               | 5,72E-13 | AHR, ANXA1, CCL5, CCR2, CCR5, CCR7, CD28, CD44, CD8A, CLU, CXCL9, CXCL16, ETS1, FCGR2B, ITGAM, ITGB2, LTB4R, LYZ, SELL, SELPLG, THBS2 | 21 |
| Hematological System Development and Function | recruitment   | recruitment of phagocytes               | 2,30E-10 | AHR, ANXA1, CCL5, CCR2, CCR5, CD28, CD44, CD8A, CLU, ETS1, FCGR2B, ITGAM, ITGB2, LYZ, THBS2                                           | 15 |
| Hematological System Development and Function | recruitment   | recruitment of antigen presenting cells | 2,35E-07 | ANXA1, CCL5, CCR2, CCR5, CD44, CD8A, ETS1, ITGB2, THBS2                                                                               | 9  |
| Hematological System Development and Function | recruitment   | recruitment of T lymphocytes            | 5,16E-07 | CCL5, CCR2, CCR7, CD44, CD8A, CXCL9, CXCL16, ETS1                                                                                     | 8  |
| Hematological System Development and Function | recruitment   | recruitment of lymphocytes              | 5,69E-07 | CCL5, CCR2, CCR7, CD44, CD8A, CXCL9, CXCL16, ETS1, SELL                                                                               | 9  |
| Hematological System Development and Function | recruitment   | recruitment of macrophages              | 1,01E-06 | ANXA1, CCR2, CCR5, CD44, CD8A, ETS1, ITGB2, THBS2                                                                                     | 8  |
| Hematological System Development and Function | recruitment   | recruitment of granulocytes             | 1,24E-06 | AHR, ANXA1, CCL5, CCR2, CD28, CD8A, CXCL9, FCGR2B, ITGAM, LTB4R, LYZ                                                                  | 11 |

| Function                                      |                |                                          |          |                                                                                                                                    |    |
|-----------------------------------------------|----------------|------------------------------------------|----------|------------------------------------------------------------------------------------------------------------------------------------|----|
| Hematological System Development and Function | aggregation    | aggregation of blood cells               | 1,75E-12 | ADRA2A, CCL5, CD44, CD47, CD209, CXCL9, FCGR2A, HCLS1, IL7, ITGAL, ITGAM, ITGB2, LCK, LCP2, NRP1, SELL, SELPLG, THBS2, TIMP2, VAV1 | 20 |
| Hematological System Development and Function | aggregation    | aggregation of leukocytes                | 2,37E-09 | CD44, CD209, IL7, ITGAL, ITGAM, ITGB2, LCK, NRP1, SELL, SELPLG                                                                     | 10 |
| Hematological System Development and Function | aggregation    | aggregation of leukocyte cell lines      | 2,17E-07 | CD2, CD47, ITGAL, ITGAM, ITGB2                                                                                                     | 5  |
| Hematological System Development and Function | aggregation    | aggregation of phagocytes                | 4,88E-06 | ITGAM, ITGB2, LCK, SELL, SELPLG                                                                                                    | 5  |
| Hematological System Development and Function | aggregation    | aggregation of blood platelets           | 9,79E-06 | ADRA2A, CCL5, CD47, FCGR2A, HCLS1, LCP2, SELL, THBS2, TIMP2, VAV1                                                                  | 10 |
| Hematological System Development and Function | aggregation    | aggregation of neutrophils               | 1,16E-05 | ITGAM, ITGB2, SELL, SELPLG                                                                                                         | 4  |
| Hematological System Development and Function | accumulation   | accumulation of leukocytes               | 7,14E-12 | CCL5, CCR2, CCR5, CCR7, CD28, CXCL9, CYBB, DEF6, GFI1, IL7, IL10RA, IL2RG, ITGAL, ITGAM, ITGAX, ITGB2, NFATC2, SELL, SELPLG, TIMP2 | 20 |
| Hematological System Development and Function | accumulation   | accumulation of mononuclear leukocytes   | 3,74E-10 | CCL5, CCR5, CCR7, CD28, DEF6, GFI1, IL7, IL10RA, IL2RG, ITGAL, ITGB2, NFATC2, SELL                                                 | 13 |
| Hematological System Development and Function | accumulation   | accumulation of lymphocytes              | 1,36E-09 | CCL5, CCR5, CCR7, CD28, DEF6, IL7, IL10RA, IL2RG, ITGAL, ITGB2, NFATC2, SELL                                                       | 12 |
| Hematological System Development and Function | accumulation   | accumulation of T lymphocytes            | 1,45E-07 | CCL5, CCR5, CCR7, CD28, DEF6, IL10RA, IL2RG, ITGAL, NFATC2                                                                         | 9  |
| Hematological System Development and Function | transmigration | transmigration of leukocytes             | 1,62E-10 | ANXA1, CCL5, CCR7, CD28, CD44, CD47, CD209, CTSS, CXCL9, ITGAL, ITGAM, ITGAX, ITGB2, TIMP2                                         | 14 |
| Hematological System Development and Function | transmigration | transmigration of mononuclear leukocytes | 2,95E-09 | CCL5, CCR7, CD28, CD44, CD47, CTSS, ITGAL, ITGAX, ITGB2, TIMP2                                                                     | 10 |
| Hematological System Development and Function | transmigration | transmigration of eosinophils            | 2,43E-06 | CD47, CXCL9, ITGAL, ITGAM, ITGB2                                                                                                   | 5  |



| Function                                      |                |                                |          |                                                                                                                  |    |
|-----------------------------------------------|----------------|--------------------------------|----------|------------------------------------------------------------------------------------------------------------------|----|
| Hematological System Development and Function | transmigration | transmigration of granulocytes | 3,66E-06 | ANXA1, CD47, CXCL9, ITGAL, ITGAM, ITGAX, ITGB2                                                                   | 7  |
| Hematological System Development and Function | transmigration | transmigration of neutrophils  | 9,11E-06 | ANXA1, CD47, ITGAL, ITGAM, ITGAX, ITGB2                                                                          | 6  |
| Hematological System Development and Function | transmigration | transmigration of monocytes    | 1,32E-05 | CD47, CTSS, ITGAL, ITGAX, ITGB2, TIMP2                                                                           | 6  |
| Hematological System Development and Function | function       | function of lymphocytes        | 2,26E-10 | AHR, CD28, FCGR2A, IL7, IL10RA, JAK3, KLRK1, PRF1, SH2D1A, STAT4, TNFSF13B, VAV1                                 | 12 |
| Hematological System Development and Function | function       | function of T lymphocytes      | 1,37E-06 | CD28, IL7, IL10RA, JAK3, PRF1, SH2D1A, STAT4, VAV1                                                               | 8  |
| Hematological System Development and Function | generation     | generation of lymphocytes      | 4,39E-10 | CD28, HLA-DQB1, IL7, IL10RA, IL2RG, IL7R, IRF4, ITK, JAK3, NOTCH2, STAT4, TBX21, TNFSF13B                        | 13 |
| Hematological System Development and Function | generation     | generation of T lymphocytes    | 5,48E-08 | CD28, HLA-DQB1, IL7, IL10RA, IL2RG, ITK, JAK3, STAT4, TBX21, TNFSF13B                                            | 10 |
| Hematological System Development and Function | generation     | generation of Th1 cells        | 7,05E-06 | CD28, JAK3, STAT4, TBX21                                                                                         | 4  |
| Hematological System Development and Function | survival       | survival of lymphocytes        | 1,73E-09 | CD28, CD44, CD8A, CLU, HCK, IL7, IL2RB, IL2RG, JAK3, LEF1, MYB (includes EG:4602), PRKCB, PTPRC, STAT4, TNFSF13B | 15 |
| Hematological System Development and Function | survival       | survival of B lymphocytes      | 3,22E-06 | CD44, CLU, HCK, IL7, LEF1, MYB (includes EG:4602), PRKCB, TNFSF13B                                               | 8  |
| Hematological System Development and Function | survival       | survival of T lymphocytes      | 3,57E-06 | CD28, CD8A, IL7, IL2RB, IL2RG, JAK3, MYB (includes EG:4602), PTPRC, STAT4                                        | 9  |
| Hematological System Development and Function | expansion      | expansion of lymphocytes       | 1,84E-09 | AHR, CD2, CD28, GFI1, IL7, IL7R, IRF1, JAK3, LCP2, NFATC2, PRF1, SH2B3, STAT4, TNFSF13B                          | 14 |
| Hematological System Development and Function | expansion      | expansion of T lymphocytes     | 2,25E-07 | AHR, CD2, CD28, GFI1, IL7, IRF1, JAK3, LCP2, PRF1, STAT4, TNFSF13B                                               | 11 |

| Function                                      |              |                                        |          |                                                                                                |    |
|-----------------------------------------------|--------------|----------------------------------------|----------|------------------------------------------------------------------------------------------------|----|
| Hematological System Development and Function | maturation   | maturation of lymphocytes              | 4,80E-09 | AHR, ATM, CD28, CD247, IL7, ITK, LCK, PTPRC, RUNX1, TBX21, TGFB2, TNFSF13B, VAV1               | 13 |
| Hematological System Development and Function | maturation   | maturation of T lymphocytes            | 4,00E-08 | ATM, CD28, CD247, IL7, ITK, LCK, PTPRC, RUNX1, TBX21, TGFB2                                    | 10 |
| Hematological System Development and Function | maturation   | maturation of thymocytes               | 2,43E-06 | CD247, IL7, LCK, PTPRC, RUNX1                                                                  | 5  |
| Hematological System Development and Function | growth       | growth of lymphocytes                  | 4,91E-09 | AHR, CD2, CD28, GFI1, IL7, IL2RB, IL7R, IRF1, JAK3, LCP2, NFATC2, PRF1, SH2B3, STAT4, TNFSF13B | 15 |
| Hematological System Development and Function | phagocytosis | phagocytosis of myeloid cells          | 7,84E-09 | ANXA1, CD47, CSF2RB, FCGR2A, IRF8, ITGAM, ITGB2, SELPLG                                        | 8  |
| Hematological System Development and Function | phagocytosis | phagocytosis of granulocytes           | 1,47E-07 | ANXA1, CD47, CSF2RB, FCGR2A, ITGAM, ITGB2, SELPLG                                              | 7  |
| Hematological System Development and Function | phagocytosis | phagocytosis of red blood cells        | 6,31E-07 | CD44, FCGR2A, HCK, ITGAM, ITGB2, RAC2                                                          | 6  |
| Hematological System Development and Function | phagocytosis | phagocytosis of macrophages            | 1,23E-06 | ANXA1, CD44, CD47, CNN2, DEF6, FCGR2B, ITGB2                                                   | 7  |
| Hematological System Development and Function | phagocytosis | phagocytosis of neutrophils            | 1,95E-06 | CD47, CSF2RB, FCGR2A, ITGAM, ITGB2, SELPLG                                                     | 6  |
| Hematological System Development and Function | cell rolling | cell rolling of leukocytes             | 8,21E-09 | ANXA1, CCR2, CCR7, CD44, FCGR2A, ITGAM, ITGB2, RAC2, SELL, SELPLG                              | 10 |
| Hematological System Development and Function | cell rolling | cell rolling of granulocytes           | 1,52E-05 | ANXA1, ITGB2, RAC2, SELL, SELPLG                                                               | 5  |
| Hematological System Development and Function | cell rolling | cell rolling of mononuclear leukocytes | 1,52E-05 | CCR2, CCR7, ITGB2, SELL, SELPLG                                                                | 5  |
| Hematological System Development and Function | selection    | selection of T lymphocytes             | 4,22E-08 | CD28, CD74, CD3D, HLA-DOA, ITK, PTPRC, SIT1, VAV1                                              | 8  |

| Function                                      |                               |                                                |          |                                                                                                                                |    |
|-----------------------------------------------|-------------------------------|------------------------------------------------|----------|--------------------------------------------------------------------------------------------------------------------------------|----|
| Hematological System Development and Function | polarization                  | polarization of T lymphocytes                  | 4,95E-08 | CD28, CD74, IRF4, LCK, RASSF5, STAT4, TBX21, VAV1, WIPF1                                                                       | 9  |
| Hematological System Development and Function | lymphopoiesis                 | lymphopoiesis                                  | 1,08E-07 | CD44, EBF1, IL7, IL2RB, IL2RG, IL7R, JAK3, MYB (includes EG:4602)                                                              | 8  |
| Hematological System Development and Function | homing                        | homing of leukocytes                           | 1,40E-07 | ANXA1, CCL5, CCR2, CCR5, CCR7, CD28, CXCL9, CXCL16, FCGR2A, HCK, ITGAL, ITGAM, ITGB2, LTB4R, PRKCB, PTPRC, RAC2, SELPLG, THBS2 | 19 |
| Hematological System Development and Function | activation-induced cell death | activation-induced cell death of T lymphocytes | 3,25E-07 | CCR5, CD28, CIITA, ITK, MAP4K1, PRF1, RAC2                                                                                     | 7  |
| Hematological System Development and Function | chemotaxis                    | chemotaxis of leukocytes                       | 3,58E-07 | ANXA1, CCL5, CCR2, CCR5, CCR7, CD28, CXCL9, CXCL16, FCGR2A, HCK, ITGAL, ITGAM, ITGB2, LTB4R, PRKCB, PTPRC, RAC2, THBS2         | 18 |
| Hematological System Development and Function | chemotaxis                    | chemotaxis of myeloid cells                    | 9,94E-06 | ANXA1, CCL5, CD28, CXCL9, FCGR2A, HCK, ITGAM, ITGB2, LTB4R, PTPRC, RAC2                                                        | 11 |
| Hematological System Development and Function | extravasation                 | extravasation of leukocytes                    | 4,14E-07 | CCL5, CCR2, CCR5, CD44, ITGAM, ITGB2, SELL                                                                                     | 7  |
| Hematological System Development and Function | infiltration                  | infiltration by neutrophils                    | 1,14E-06 | ANXA1, CASP1, CCR2, CD44, ITGAL, ITGAM, ITGB2, LTB4R, RAC2, SELL, TGFBR2                                                       | 11 |
| Hematological System Development and Function | egression                     | egression of leukocytes                        | 1,64E-06 | CCR2, CCR5, CCR7, ITGAM, ITGB2                                                                                                 | 5  |
| Hematological System Development and Function | signaling                     | signaling of T lymphocytes                     | 1,64E-06 | IL2RB, IL2RG, ITGB2, LCP2, SH2D1A                                                                                              | 5  |
| Hematological System Development and Function | stimulation                   | stimulation of T lymphocytes                   | 1,85E-06 | CD2, CD28, CD74, CD209, IL7, KLRK1, PTPRC, TNFSF13B                                                                            | 8  |
| Hematological System Development and Function | response                      | response of lymphocytes                        | 3,18E-06 | CD28, CXCL9, FCGR2B, GZMB, IL10RA, ITK, NFATC2, SELPLG, STAT4, TBX21                                                           | 10 |
| Hematological System Development and Function | trafficking                   | trafficking of phagocytes                      | 3,84E-06 | CCL5, CCR5, ITGB2                                                                                                              | 3  |

| Function                                      |               |                                         |          |                                                                                                                                                                                                                                                                                                                                                                                                                                                                                                                                                  |  |    |
|-----------------------------------------------|---------------|-----------------------------------------|----------|--------------------------------------------------------------------------------------------------------------------------------------------------------------------------------------------------------------------------------------------------------------------------------------------------------------------------------------------------------------------------------------------------------------------------------------------------------------------------------------------------------------------------------------------------|--|----|
| Hematological System Development and Function | trafficking   | trafficking of leukocytes               | 6,13E-06 | ANXA1, CCL5, CCR2, CCR5, CD44, ITGB2                                                                                                                                                                                                                                                                                                                                                                                                                                                                                                             |  | 6  |
| Hematological System Development and Function | trafficking   | trafficking of antigen presenting cells | 1,52E-05 | CCL5, CCR2, CCR5                                                                                                                                                                                                                                                                                                                                                                                                                                                                                                                                 |  | 3  |
| Hematological System Development and Function | detachment    | detachment of leukocytes                | 7,05E-06 | ANXA1, ITGAL, PTPRC, SELL                                                                                                                                                                                                                                                                                                                                                                                                                                                                                                                        |  | 4  |
| Hematological System Development and Function | attachment    | attachment of lymphocytes               | 1,16E-05 | CD209, ITGB2, SELL, VAV1                                                                                                                                                                                                                                                                                                                                                                                                                                                                                                                         |  | 4  |
| Hematopoiesis                                 | development   | development of leukocytes               | 1,19E-38 | AHR, ANXA1, ATM, BCL11A, BCL11B, BCL2A1, CASP1, CCL5, CCR5, CCR7, CD2, CD28, CD44, CD47, CD74, CD247, CD3D, CD8A, CIITA, CSF1R, DEF6, EBF1, EOMES, ETS1, FCGR2A, FCGR2B, GFI1, GZMA, GZMB, HLA-C, HLA-DOA, HLA-DQB1, IKZF1, IL7, IL10RA, IL2RB, IL2RG, IL7R, IRF1, IRF4, IRF8, ITGAL, ITGB2, ITK, JAK3, LCK, LCP2, LEF1, MAP4K1, MYB (includes EG:4602), NFATC2, NOTCH2, PRF1, PTPN22, PTPRC, RAC2, RASSF5, RUNX1, RUNX2, SH2D1A, SIT1, STAT4, TBX21, TCF4, TGFB2, THBS2, TNFSF13B, VAV1, WIPF1                                                  |  | 69 |
| Hematopoiesis                                 | development   | T cell development                      | 1,24E-38 | AHR, ANXA1, ATM, BCL11A, BCL11B, BCL2A1, CASP1, CCL5, CCR5, CCR7, CD2, CD28, CD44, CD47, CD74, CD247, CD3D, CD8A, CIITA, DEF6, EOMES, ETS1, FCGR2A, FCGR2B, GFI1, GZMA, GZMB, HLA-C, HLA-DOA, HLA-DQB1, IKZF1, IL7, IL10RA, IL2RB, IL2RG, IL7R, IRF1, IRF4, IRF8, ITGAL, ITGB2, ITK, JAK3, LCK, LCP2, LEF1, MAP4K1, MYB (includes EG:4602), NFATC2, PRF1, PTPN22, PTPRC, RAC2, RASSF5, RUNX1, RUNX2, SH2D1A, SIT1, STAT4, TBX21, TCF4, TGFB2, THBS2, TNFSF13B, VAV1, WIPF1                                                                       |  | 66 |
| Hematopoiesis                                 | development   | development of lymphocytes              | 1,44E-38 | AHR, ANXA1, ATM, BCL11A, BCL11B, BCL2A1, CASP1, CCL5, CCR5, CCR7, CD2, CD28, CD44, CD47, CD74, CD247, CD3D, CD8A, CIITA, DEF6, EBF1, EOMES, ETS1, FCGR2A, FCGR2B, GFI1, GZMA, GZMB, HLA-C, HLA-DOA, HLA-DQB1, IKZF1, IL7, IL10RA, IL2RB, IL2RG, IL7R, IRF1, IRF4, IRF8, ITGAL, ITGB2, ITK, JAK3, LCK, LCP2, LEF1, MAP4K1, MYB (includes EG:4602), NFATC2, NOTCH2, PRF1, PTPN22, PTPRC, RAC2, RASSF5, RUNX1, RUNX2, SH2D1A, SIT1, STAT4, TBX21, TCF4, TGFB2, THBS2, TNFSF13B, VAV1, WIPF1                                                         |  | 68 |
| Hematopoiesis                                 | development   | development of thymocytes               | 4,81E-10 | CD74, CD3D, ETS1, IL7, IL2RB, IL2RG, IL7R, IRF1, LCP2, MYB (includes EG:4602), PTPRC, SIT1                                                                                                                                                                                                                                                                                                                                                                                                                                                       |  | 12 |
| Hematopoiesis                                 | development   | development of helper T lymphocytes     | 7,26E-07 | AHR, CASP1, CD28, IRF1, ITGB2, ITK, STAT4, TBX21                                                                                                                                                                                                                                                                                                                                                                                                                                                                                                 |  | 8  |
| Hematopoiesis                                 | development   | NK cell development                     | 9,73E-07 | CD2, EOMES, FCGR2A, IKZF1, IL7, IRF1, ITGAL, JAK3, TBX21                                                                                                                                                                                                                                                                                                                                                                                                                                                                                         |  | 9  |
| Hematopoiesis                                 | development   | development of B lymphocytes            | 1,06E-06 | EBF1, IL7, IL2RG, IL7R, JAK3, MYB (includes EG:4602), NOTCH2, TCF4, TNFSF13B, VAV1                                                                                                                                                                                                                                                                                                                                                                                                                                                               |  | 10 |
| Hematopoiesis                                 | hematopoiesis | hematopoiesis                           | 5,09E-38 | AHR, ANXA1, ATM, BCL11A, BCL11B, BCL2A1, CASP1, CCL5, CCR2, CCR5, CCR7, CD2, CD28, CD44, CD47, CD74, CD247, CD3D, CD8A, CIITA, CSF1R, CSF2RB, DEF6, EBF1, EOMES, ETS1, ETV6, FCGR2A, FCGR2B, GFI1, GZMA, GZMB, HHEX, HLA-C, HLA-DOA, HLA-DQB1, IKZF1, IL7, IL10RA, IL2RB, IL2RG, IL7R, IRF1, IRF4, IRF8, ITGAL, ITGB2, ITK, JAK3, LCK, LCP2, LEF1, MAP4K1, MYB (includes EG:4602), NFAM1, NFATC2, NOTCH2, PRF1, PTPN22, PTPRC, RAC2, RASGRP4, RASSF5, RUNX1, RUNX2, SH2B3, SH2D1A, SIT1, STAT4, TBX21, TCF4, TGFB2, THBS2, TNFSF13B, VAV1, WIPF1 |  | 76 |

|               |                 |                                                   |          |                                                                                                                                                                                                                                                                                                                                                                                                    |    |
|---------------|-----------------|---------------------------------------------------|----------|----------------------------------------------------------------------------------------------------------------------------------------------------------------------------------------------------------------------------------------------------------------------------------------------------------------------------------------------------------------------------------------------------|----|
| Hematopoiesis | hematopoiesis   | hematopoiesis of cells                            | 3,07E-07 | ATM, CCR2, CD44, EBF1, ETV6, HHEX, IKZF1, IL7, JAK3, NOTCH2, RUNX1, SH2B3                                                                                                                                                                                                                                                                                                                          | 12 |
| Hematopoiesis | differentiation | differentiation of leukocytes                     | 1,01E-30 | AHR, ANXA1, ATM, BCL11A, BCL2A1, CD2, CD28, CD47, CD74, CD300A, CD3D, CD8A, CSF1R, CSF2RB, DEF6, EBF1, ETS1, FCGR2B, GFI1, HLA-C, HLA-DOA, IKZF1, IL7, IL2RB, IL2RG, IL7R, IRF1, IRF4, IRF8, ITGAL, ITGAM, ITGB2, ITGB6, ITK, JAK3, LCK, LCP2, LEF1, MYB (includes EG:4602), NFAM1, NFATC2, PTPN22, PTPRC, RASGRP4, RASSF5, RUNX1, RUNX2, SH2D1A, SIT1, STAT4, TBX21, TGFB2, TNFSF13B, VAV1, WIPF1 | 55 |
| Hematopoiesis | differentiation | differentiation of T lymphocytes                  | 1,50E-28 | AHR, ANXA1, ATM, BCL11A, BCL2A1, CD2, CD28, CD74, CD8A, DEF6, ETS1, FCGR2B, HLA-C, HLA-DOA, IKZF1, IL7, IL2RB, IL2RG, IL7R, IRF1, IRF4, IRF8, ITGAL, ITGB2, ITK, JAK3, LCK, LCP2, LEF1, MYB (includes EG:4602), NFATC2, PTPN22, PTPRC, RASSF5, RUNX1, SH2D1A, STAT4, TBX21, TGFB2, TNFSF13B, VAV1, WIPF1                                                                                           | 42 |
| Hematopoiesis | differentiation | differentiation of lymphocytes                    | 1,06E-27 | AHR, ANXA1, ATM, BCL11A, BCL2A1, CD2, CD28, CD74, CD3D, CD8A, DEF6, EBF1, ETS1, FCGR2B, HLA-C, HLA-DOA, IKZF1, IL7, IL2RB, IL2RG, IL7R, IRF1, IRF4, IRF8, ITGAL, ITGB2, ITK, JAK3, LCK, LCP2, LEF1, MYB (includes EG:4602), NFAM1, NFATC2, PTPN22, PTPRC, RASSF5, RUNX1, SH2D1A, SIT1, STAT4, TBX21, TGFB2, TNFSF13B, VAV1, WIPF1                                                                  | 46 |
| Hematopoiesis | differentiation | differentiation of mononuclear leukocytes         | 5,62E-27 | AHR, ANXA1, ATM, BCL11A, BCL2A1, CD2, CD28, CD74, CD3D, CD8A, CSF1R, DEF6, EBF1, ETS1, FCGR2B, HLA-C, HLA-DOA, IKZF1, IL7, IL2RB, IL2RG, IL7R, IRF1, IRF4, IRF8, ITGAL, ITGB2, ITK, JAK3, LCK, LCP2, LEF1, MYB (includes EG:4602), NFAM1, NFATC2, PTPN22, PTPRC, RASSF5, RUNX1, SH2D1A, SIT1, STAT4, TBX21, TGFB2, TNFSF13B, VAV1, WIPF1                                                           | 47 |
| Hematopoiesis | differentiation | differentiation of helper T lymphocytes           | 6,25E-15 | AHR, ANXA1, CD28, ETS1, IL7, IL2RB, IRF1, IRF8, ITGAL, ITGB2, ITK, JAK3, NFATC2, RUNX1, SH2D1A, STAT4, TBX21, TGFB2, TNFSF13B, VAV1                                                                                                                                                                                                                                                                | 20 |
| Hematopoiesis | differentiation | differentiation of Th2 cells                      | 1,44E-08 | CD28, IRF1, ITK, JAK3, NFATC2, RUNX1, SH2D1A, STAT4, TBX21, VAV1                                                                                                                                                                                                                                                                                                                                   | 10 |
| Hematopoiesis | differentiation | differentiation of hematopoietic cells            | 1,77E-08 | CSF1R, ETV6, FLI1, GFI1, HHEX, IKZF1, IL7, IRF8, JAK3, MYB (includes EG:4602), RUNX1, RUNX2, THBS2                                                                                                                                                                                                                                                                                                 | 13 |
| Hematopoiesis | differentiation | differentiation of hematopoietic progenitor cells | 3,47E-07 | CSF1R, FLI1, GFI1, HHEX, IKZF1, IL7, IRF8, MYB (includes EG:4602), RUNX1, RUNX2, THBS2                                                                                                                                                                                                                                                                                                             | 11 |
| Hematopoiesis | differentiation | differentiation of B lymphocytes                  | 1,56E-06 | BCL11A, CD74, EBF1, IKZF1, IL7, IL2RB, IL2RG, IL7R, IRF4, NFAM1, PTPRC, TNFSF13B                                                                                                                                                                                                                                                                                                                   | 12 |
| Hematopoiesis | differentiation | differentiation of thymocytes                     | 5,92E-06 | CD2, CD28, FCGR2B, IKZF1, IL2RG, LCP2, MYB (includes EG:4602)                                                                                                                                                                                                                                                                                                                                      | 7  |
| Hematopoiesis | differentiation | differentiation of Th1 cells                      | 1,21E-05 | ANXA1, IRF1, IRF8, ITGAL, ITGB2, JAK3, STAT4, TBX21                                                                                                                                                                                                                                                                                                                                                | 8  |
| Hematopoiesis | cell death      | cell death of T lymphocytes                       | 5,27E-17 | ATM, BCL2A1, CASP1, CCL5, CCR5, CD2, CD28, CD44, CD47, CD247, CIITA, DEF6, EOMES, GFI1, GZMA, GZMB, IL7, IL2RG, IL7R, ITK, JAK3, LCK, MAP4K1, PRF1, PTPRC, RAC2, TBX21, TGFB2, THBS2                                                                                                                                                                                                               | 29 |
| Hematopoiesis | cell death      | cell death of thymocytes                          | 7,66E-06 | ATM, BCL2A1, CASP1, CD28, CD44, GFI1, GZMA, GZMB, IL7, PTPRC                                                                                                                                                                                                                                                                                                                                       | 10 |
| Hematopoiesis | apoptosis       | apoptosis of T lymphocytes                        | 7,02E-15 | ATM, BCL2A1, CASP1, CCL5, CCR5, CD2, CD28, CD44, CD47, CD247, CIITA, GFI1, GZMA, GZMB, IL7, IL2RG, IL7R, ITK, JAK3, LCK, MAP4K1, PRF1, PTPRC, RAC2, THBS2                                                                                                                                                                                                                                          | 25 |
| Hematopoiesis | selection       | selection of T lymphocytes                        | 4,22E-08 | CD28, CD74, CD3D, HLA-DOA, ITK, PTPRC, SIT1, VAV1                                                                                                                                                                                                                                                                                                                                                  | 8  |
| Hematopoiesis | polarization    | polarization of T lymphocytes                     | 4,95E-08 | CD28, CD74, IRF4, LCK, RASSF5, STAT4, TBX21, VAV1, WIPF1                                                                                                                                                                                                                                                                                                                                           | 9  |
| Hematopoiesis | generation      | generation of T lymphocytes                       | 5,48E-08 | CD28, HLA-DQB1, IL7, IL10RA, IL2RG, ITK, JAK3, STAT4, TBX21, TNFSF13B                                                                                                                                                                                                                                                                                                                              | 10 |

|                               |                               |                                                |          |                                                                                                                                                                                                                                                                                                                                                                                                                                                                             |    |
|-------------------------------|-------------------------------|------------------------------------------------|----------|-----------------------------------------------------------------------------------------------------------------------------------------------------------------------------------------------------------------------------------------------------------------------------------------------------------------------------------------------------------------------------------------------------------------------------------------------------------------------------|----|
| Hematopoiesis                 | generation                    | generation of Th1 cells                        | 7,05E-06 | CD28, JAK3, STAT4, TBX21                                                                                                                                                                                                                                                                                                                                                                                                                                                    | 4  |
| Hematopoiesis                 | quantity                      | quantity of thymocytes                         | 5,97E-08 | ATM, CCR7, CD247, ETS1, IL7, IL2RG, IL7R, ITK, JAK3, LCK, LCP2, RUNX1                                                                                                                                                                                                                                                                                                                                                                                                       | 12 |
| Hematopoiesis                 | quantity                      | quantity of pre-B lymphocytes                  | 1,23E-06 | CD28, IL7, IL2RG, IL7R, SH2B3, TCF4, TNFSF13B                                                                                                                                                                                                                                                                                                                                                                                                                               | 7  |
| Hematopoiesis                 | quantity                      | quantity of hematopoietic progenitor cells     | 2,87E-06 | FLI1, IKZF1, IRF8, JAK3, MYB (includes EG:4602), RUNX1, SH2B3, STAT4, THBS2                                                                                                                                                                                                                                                                                                                                                                                                 | 9  |
| Hematopoiesis                 | quantity                      | quantity of pro-B lymphocytes                  | 1,52E-05 | CD28, IL7, IL2RG, IL7R, TCF4                                                                                                                                                                                                                                                                                                                                                                                                                                                | 5  |
| Hematopoiesis                 | lymphopoiesis                 | lymphopoiesis                                  | 1,08E-07 | CD44, EBF1, IL7, IL2RB, IL2RG, IL7R, JAK3, MYB (includes EG:4602)                                                                                                                                                                                                                                                                                                                                                                                                           | 8  |
| Hematopoiesis                 | migration                     | migration of neutrophils                       | 1,42E-07 | ANXA1, CCL5, CD47, CNN2, HCK, ITGAL, ITGAM, ITGAX, ITGB2, MMP7, SELL                                                                                                                                                                                                                                                                                                                                                                                                        | 11 |
| Hematopoiesis                 | migration                     | migration of granulocytes                      | 4,86E-07 | ANXA1, CCL5, CD47, CNN2, CXCL9, HCK, ITGAL, ITGAM, ITGAX, ITGB2, MMP7, SELL                                                                                                                                                                                                                                                                                                                                                                                                 | 12 |
| Hematopoiesis                 | activation-induced cell death | activation-induced cell death of T lymphocytes | 3,25E-07 | CCR5, CD28, CIITA, ITK, MAP4K1, PRF1, RAC2                                                                                                                                                                                                                                                                                                                                                                                                                                  | 7  |
| Hematopoiesis                 | transmigration                | transmigration of eosinophils                  | 2,43E-06 | CD47, CXCL9, ITGAL, ITGAM, ITGB2                                                                                                                                                                                                                                                                                                                                                                                                                                            | 5  |
| Hematopoiesis                 | transmigration                | transmigration of granulocytes                 | 3,66E-06 | ANXA1, CD47, CXCL9, ITGAL, ITGAM, ITGAX, ITGB2                                                                                                                                                                                                                                                                                                                                                                                                                              | 7  |
| Hematopoiesis                 | transmigration                | transmigration of neutrophils                  | 9,11E-06 | ANXA1, CD47, ITGAL, ITGAM, ITGAX, ITGB2                                                                                                                                                                                                                                                                                                                                                                                                                                     | 6  |
| Hematopoiesis                 | cell movement                 | cell movement of bone marrow cells             | 7,72E-06 | ANXA1, CD44, CD47, CXCL9, ITGAL, ITGAM, ITGAX, ITGB2                                                                                                                                                                                                                                                                                                                                                                                                                        | 8  |
| Hematopoiesis                 | proliferation                 | proliferation of thymocytes                    | 1,67E-05 | CD2, CD28, IL7, IL2RG, ITK, JAK3, LCP2, MYB (includes EG:4602)                                                                                                                                                                                                                                                                                                                                                                                                              | 8  |
| Cell-mediated Immune Response | development                   | T cell development                             | 1,24E-38 | AHR, ANXA1, ATM, BCL11A, BCL11B, BCL2A1, CASP1, CCL5, CCR5, CCR7, CD2, CD28, CD44, CD47, CD74, CD247, CD3D, CD8A, CIITA, DEF6, EOMES, ETS1, FCGR2A, FCGR2B, GFI1, GZMA, GZMB, HLA-C, HLA-DOA, HLA-DQB1, IKZF1, IL7, IL10RA, IL2RB, IL2RG, IL7R, IRF1, IRF4, IRF8, ITGAL, ITGB2, ITK, JAK3, LCK, LCP2, LEF1, MAP4K1, MYB (includes EG:4602), NFATC2, PRF1, PTPN22, PTPRC, RAC2, RASSF5, RUNX1, RUNX2, SH2D1A, SIT1, STAT4, TBX21, TCF4, TGFBR2, THBS2, TNFSF13B, VAV1, WIPF1 | 66 |
| Cell-mediated Immune Response | development                   | development of thymocytes                      | 4,81E-10 | CD74, CD3D, ETS1, IL7, IL2RB, IL2RG, IL7R, IRF1, LCP2, MYB (includes EG:4602), PTPRC, SIT1                                                                                                                                                                                                                                                                                                                                                                                  | 12 |
| Cell-mediated Immune Response | development                   | development of helper T lymphocytes            | 7,26E-07 | AHR, CASP1, CD28, IRF1, ITGB2, ITK, STAT4, TBX21                                                                                                                                                                                                                                                                                                                                                                                                                            | 8  |
| Cell-mediated Immune Response | development                   | NK cell development                            | 9,73E-07 | CD2, EOMES, FCGR2A, IKZF1, IL7, IRF1, ITGAL, JAK3, TBX21                                                                                                                                                                                                                                                                                                                                                                                                                    | 9  |
| Cell-mediated Immune Response | differentiation               | differentiation of T lymphocytes               | 1,50E-28 | AHR, ANXA1, ATM, BCL11A, BCL2A1, CD2, CD28, CD74, CD8A, DEF6, ETS1, FCGR2B, HLA-C, HLA-DOA, IKZF1, IL7, IL2RB, IL2RG, IL7R, IRF1, IRF4, IRF8, ITGAL, ITGB2, ITK, JAK3, LCK, LCP2, LEF1, MYB (includes EG:4602), NFATC2, PTPN22, PTPRC, RASSF5, RUNX1, SH2D1A, STAT4, TBX21, TGFBR2, TNFSF13B, VAV1, WIPF1                                                                                                                                                                   | 42 |
| Cell-                         | differentiation               | differentiation                                | 6,25E-   | AHR, ANXA1, CD28, ETS1, IL7, IL2RB, IRF1, IRF8, ITGAL, ITGB2, ITK, JAK3,                                                                                                                                                                                                                                                                                                                                                                                                    | 20 |

|                               |                               |                                                |          |                                                                                                                                                                                       |    |
|-------------------------------|-------------------------------|------------------------------------------------|----------|---------------------------------------------------------------------------------------------------------------------------------------------------------------------------------------|----|
| mediated Immune Response      | on                            | on of helper T lymphocytes                     | 15       | NFATC2, RUNX1, SH2D1A, STAT4, TBX21, TGFBR2, TNFSF13B, VAV1                                                                                                                           |    |
| Cell-mediated Immune Response | differentiation               | differentiation of Th2 cells                   | 1,44E-08 | CD28, IRF1, ITK, JAK3, NFATC2, RUNX1, SH2D1A, STAT4, TBX21, VAV1                                                                                                                      | 10 |
| Cell-mediated Immune Response | differentiation               | differentiation of thymocytes                  | 5,92E-06 | CD2, CD28, FCGR2B, IKZF1, IL2RG, LCP2, MYB (includes EG:4602)                                                                                                                         | 7  |
| Cell-mediated Immune Response | differentiation               | differentiation of Th1 cells                   | 1,21E-05 | ANXA1, IRF1, IRF8, ITGAL, ITGB2, JAK3, STAT4, TBX21                                                                                                                                   | 8  |
| Cell-mediated Immune Response | cell death                    | cell death of T lymphocytes                    | 5,27E-17 | ATM, BCL2A1, CASP1, CCL5, CCR5, CD2, CD28, CD44, CD47, CD247, CIITA, DEF6, EOMES, GFI1, GZMA, GZMB, IL7, IL2RG, IL7R, ITK, JAK3, LCK, MAP4K1, PRF1, PTPRC, RAC2, TBX21, TGFBR2, THBS2 | 29 |
| Cell-mediated Immune Response | cell death                    | cell death of thymocytes                       | 7,66E-06 | ATM, BCL2A1, CASP1, CD28, CD44, GFI1, GZMA, GZMB, IL7, PTPRC                                                                                                                          | 10 |
| Cell-mediated Immune Response | apoptosis                     | apoptosis of T lymphocytes                     | 7,02E-15 | ATM, BCL2A1, CASP1, CCL5, CCR5, CD2, CD28, CD44, CD47, CD247, CIITA, GFI1, GZMA, GZMB, IL7, IL2RG, IL7R, ITK, JAK3, LCK, MAP4K1, PRF1, PTPRC, RAC2, THBS2                             | 25 |
| Cell-mediated Immune Response | adhesion                      | adhesion of T lymphocytes                      | 1,51E-12 | CD2, CD44, CD47, CD48, CD209, CXCL9, FYB, IL7, ITGAL, ITGB2, ITK, RASSF5, SELL, SELPLG, THBS2                                                                                         | 15 |
| Cell-mediated Immune Response | migration                     | T cell migration                               | 1,62E-09 | CCL5, CCR2, CCR5, CCR7, CD28, CD44, CXCL9, CXCL16, FYB, IL7, ITGB2, ITK, LCK, PRF1, SELL, SELPLG, THBS2, TIMP2                                                                        | 18 |
| Cell-mediated Immune Response | selection                     | selection of T lymphocytes                     | 4,22E-08 | CD28, CD74, CD3D, HLA-DOA, ITK, PTPRC, SIT1, VAV1                                                                                                                                     | 8  |
| Cell-mediated Immune Response | polarization                  | polarization of T lymphocytes                  | 4,95E-08 | CD28, CD74, IRF4, LCK, RASSF5, STAT4, TBX21, VAV1, WIPF1                                                                                                                              | 9  |
| Cell-mediated Immune Response | generation                    | generation of T lymphocytes                    | 5,48E-08 | CD28, HLA-DQB1, IL7, IL10RA, IL2RG, ITK, JAK3, STAT4, TBX21, TNFSF13B                                                                                                                 | 10 |
| Cell-mediated Immune Response | generation                    | generation of Th1 cells                        | 7,05E-06 | CD28, JAK3, STAT4, TBX21                                                                                                                                                              | 4  |
| Cell-mediated Immune Response | cell movement                 | cell movement of T lymphocytes                 | 1,12E-07 | CCL5, CCR2, CCR5, CCR7, CD28, CD44, CXCL9, CXCL16, ITGB2, ITK, PRF1, SELL, SELPLG, THBS2                                                                                              | 14 |
| Cell-mediated Immune Response | cell movement                 | movement of memory T lymphocytes               | 6,67E-06 | CCL5, CCR7, CD28, CXCL9, ITGB2                                                                                                                                                        | 5  |
| Cell-mediated Immune Response | activation-induced cell death | activation-induced cell death of T lymphocytes | 3,25E-07 | CCR5, CD28, CIITA, ITK, MAP4K1, PRF1, RAC2                                                                                                                                            | 7  |
| Cell-mediated Immune Response | recruitment                   | recruitment of T                               | 5,16E-07 | CCL5, CCR2, CCR7, CD44, CD8A, CXCL9, CXCL16, ETS1                                                                                                                                     | 8  |

|                                   |                 |                                         |          |                                                                                                                                                                                                                                                                                                                                                                                                                                                                            |  |    |
|-----------------------------------|-----------------|-----------------------------------------|----------|----------------------------------------------------------------------------------------------------------------------------------------------------------------------------------------------------------------------------------------------------------------------------------------------------------------------------------------------------------------------------------------------------------------------------------------------------------------------------|--|----|
| Immune Response                   |                 | lymphocytes                             |          |                                                                                                                                                                                                                                                                                                                                                                                                                                                                            |  |    |
| Cell-mediated Immune Response     | formation       | formation of immunological synapses     | 1,07E-06 | CD28, CD209, DEF6, ITGAM, ITK                                                                                                                                                                                                                                                                                                                                                                                                                                              |  | 5  |
| Cell-mediated Immune Response     | proliferation   | proliferation of thymocytes             | 1,67E-05 | CD2, CD28, IL7, IL2RG, ITK, JAK3, LCP2, MYB (includes EG:4602)                                                                                                                                                                                                                                                                                                                                                                                                             |  | 8  |
| Cellular Function and Maintenance | development     | T cell development                      | 1,24E-38 | AHR, ANXA1, ATM, BCL11A, BCL11B, BCL2A1, CASP1, CCL5, CCR5, CCR7, CD2, CD28, CD44, CD47, CD74, CD247, CD3D, CD8A, CIITA, DEF6, EOMES, ETS1, FCGR2A, FCGR2B, GFI1, GZMA, GZMB, HLA-C, HLA-DOA, HLA-DQB1, IKZF1, IL7, IL10RA, IL2RB, IL2RG, IL7R, IRF1, IRF4, IRF8, ITGAL, ITGB2, ITK, JAK3, LCK, LCP2, LEF1, MAP4K1, MYB (includes EG:4602), NFATC2, PRF1, PTPN22, PTPRC, RAC2, RASSF5, RUNX1, RUNX2, SH2D1A, SIT1, STAT4, TBX21, TCF4, TGFB2, THBS2, TNFSF13B, VAV1, WIPF1 |  | 66 |
| Cellular Function and Maintenance | development     | development of thymocytes               | 4,81E-10 | CD74, CD3D, ETS1, IL7, IL2RB, IL2RG, IL7R, IRF1, LCP2, MYB (includes EG:4602), PTPRC, SIT1                                                                                                                                                                                                                                                                                                                                                                                 |  | 12 |
| Cellular Function and Maintenance | development     | development of helper T lymphocytes     | 7,26E-07 | AHR, CASP1, CD28, IRF1, ITGB2, ITK, STAT4, TBX21                                                                                                                                                                                                                                                                                                                                                                                                                           |  | 8  |
| Cellular Function and Maintenance | development     | NK cell development                     | 9,73E-07 | CD2, EOMES, FCGR2A, IKZF1, IL7, IRF1, ITGAL, JAK3, TBX21                                                                                                                                                                                                                                                                                                                                                                                                                   |  | 9  |
| Cellular Function and Maintenance | differentiation | differentiation of T lymphocytes        | 1,50E-28 | AHR, ANXA1, ATM, BCL11A, BCL2A1, CD2, CD28, CD74, CD8A, DEF6, ETS1, FCGR2B, HLA-C, HLA-DOA, IKZF1, IL7, IL2RB, IL2RG, IL7R, IRF1, IRF4, IRF8, ITGAL, ITGB2, ITK, JAK3, LCK, LCP2, LEF1, MYB (includes EG:4602), NFATC2, PTPN22, PTPRC, RASSF5, RUNX1, SH2D1A, STAT4, TBX21, TGFB2, TNFSF13B, VAV1, WIPF1                                                                                                                                                                   |  | 42 |
| Cellular Function and Maintenance | differentiation | differentiation of helper T lymphocytes | 6,25E-15 | AHR, ANXA1, CD28, ETS1, IL7, IL2RB, IRF1, IRF8, ITGAL, ITGB2, ITK, JAK3, NFATC2, RUNX1, SH2D1A, STAT4, TBX21, TGFB2, TNFSF13B, VAV1                                                                                                                                                                                                                                                                                                                                        |  | 20 |
| Cellular Function and Maintenance | differentiation | differentiation of Th2 cells            | 1,44E-08 | CD28, IRF1, ITK, JAK3, NFATC2, RUNX1, SH2D1A, STAT4, TBX21, VAV1                                                                                                                                                                                                                                                                                                                                                                                                           |  | 10 |
| Cellular Function and Maintenance | differentiation | differentiation of thymocytes           | 5,92E-06 | CD2, CD28, FCGR2B, IKZF1, IL2RG, LCP2, MYB (includes EG:4602)                                                                                                                                                                                                                                                                                                                                                                                                              |  | 7  |
| Cellular Function and Maintenance | differentiation | differentiation of Th1 cells            | 1,21E-05 | ANXA1, IRF1, IRF8, ITGAL, ITGB2, JAK3, STAT4, TBX21                                                                                                                                                                                                                                                                                                                                                                                                                        |  | 8  |
| Cellular Function and Maintenance | cell death      | cell death of T lymphocytes             | 5,27E-17 | ATM, BCL2A1, CASP1, CCL5, CCR5, CD2, CD28, CD44, CD47, CD247, CIITA, DEF6, EOMES, GFI1, GZMA, GZMB, IL7, IL2RG, IL7R, ITK, JAK3, LCK, MAP4K1, PRF1, PTPRC, RAC2, TBX21, TGFB2, THBS2                                                                                                                                                                                                                                                                                       |  | 29 |
| Cellular Function and Maintenance | cell death      | cell death of thymocytes                | 7,66E-06 | ATM, BCL2A1, CASP1, CD28, CD44, GFI1, GZMA, GZMB, IL7, PTPRC                                                                                                                                                                                                                                                                                                                                                                                                               |  | 10 |



|                                   |              |                                  |          |                                                                                                                                                           |    |  |
|-----------------------------------|--------------|----------------------------------|----------|-----------------------------------------------------------------------------------------------------------------------------------------------------------|----|--|
| Maintenance                       |              |                                  |          |                                                                                                                                                           |    |  |
| Cellular Function and Maintenance | apoptosis    | apoptosis of T lymphocytes       | 7,02E-15 | ATM, BCL2A1, CASP1, CCL5, CCR5, CD2, CD28, CD44, CD47, CD247, CIITA, GFI1, GZMA, GZMB, IL7, IL2RG, IL7R, ITK, JAK3, LCK, MAP4K1, PRF1, PTPRC, RAC2, THBS2 | 25 |  |
| Cellular Function and Maintenance | function     | function of leukocytes           | 5,45E-12 | AHR, CD28, CD209, FCGR2A, GFI1, IL7, IL10RA, IRF1, JAK3, KLRK1, PRF1, SH2D1A, STAT4, TNFSF13B, VAV1                                                       | 15 |  |
| Cellular Function and Maintenance | function     | function of cells                | 1,81E-11 | AHR, CD28, CD44, CD47, CD209, FCGR2A, GFI1, IL7, IL10RA, IRF1, JAK3, KLRK1, PRF1, SH2D1A, STAT4, TBX21, TNFSF13B, VAV1                                    | 18 |  |
| Cellular Function and Maintenance | function     | function of lymphocytes          | 2,26E-10 | AHR, CD28, FCGR2A, IL7, IL10RA, JAK3, KLRK1, PRF1, SH2D1A, STAT4, TNFSF13B, VAV1                                                                          | 12 |  |
| Cellular Function and Maintenance | function     | function of normal cells         | 5,10E-10 | AHR, CD28, CD47, CD209, FCGR2A, GFI1, IL7, IL10RA, IRF1, JAK3, KLRK1, PRF1, SH2D1A, STAT4, TNFSF13B, VAV1                                                 | 16 |  |
| Cellular Function and Maintenance | function     | function of T lymphocytes        | 1,37E-06 | CD28, IL7, IL10RA, JAK3, PRF1, SH2D1A, STAT4, VAV1                                                                                                        | 8  |  |
| Cellular Function and Maintenance | engulfment   | engulfment of cells              | 6,44E-12 | ANXA1, CD44, CD47, CD209, CNN2, CSF2RB, DEF6, FCGR2A, FCGR2B, HCK, IRF8, ITGAM, ITGAX, ITGB2, MRC1, PRKCB, RAC2, SELPLG, VAV1, WIPF1                      | 20 |  |
| Cellular Function and Maintenance | engulfment   | engulfment of eukaryotic cells   | 7,27E-12 | ANXA1, CD44, CD47, CD209, CNN2, CSF2RB, DEF6, FCGR2A, FCGR2B, HCK, IRF8, ITGAM, ITGB2, PRKCB, RAC2, SELPLG, VAV1                                          | 17 |  |
| Cellular Function and Maintenance | engulfment   | engulfment of tumor cell lines   | 1,08E-07 | ANXA1, CD44, CD209, DEF6, FCGR2A, FCGR2B, ITGAM, PRKCB                                                                                                    | 8  |  |
| Cellular Function and Maintenance | engulfment   | engulfment of cell lines         | 2,35E-07 | ANXA1, CD44, CD209, DEF6, FCGR2A, FCGR2B, ITGAM, PRKCB, VAV1                                                                                              | 9  |  |
| Cellular Function and Maintenance | phagocytosis | phagocytosis of blood cells      | 7,54E-12 | ANXA1, CD44, CD47, CNN2, CSF2RB, DEF6, FCGR2A, FCGR2B, HCK, IRF8, ITGAM, ITGB2, RAC2, SELPLG                                                              | 14 |  |
| Cellular Function and Maintenance | phagocytosis | phagocytosis of eukaryotic cells | 2,08E-11 | ANXA1, CD44, CD47, CNN2, CSF2RB, DEF6, FCGR2A, FCGR2B, HCK, IRF8, ITGAM, ITGB2, PRKCB, RAC2, SELPLG, VAV1                                                 | 16 |  |
| Cellular Function and Maintenance | phagocytosis | phagocytosis                     | 3,55E-11 | ANXA1, CD44, CD47, CLEC7A, CNN2, CSF2RB, DEF6, FCGR2A, FCGR2B, HCK, IRF8, ITGAM, ITGAX, ITGB2, PRKCB, RAC2, SELPLG, VAV1                                  | 18 |  |

|                                   |              |                                     |          |                                                                                                                  |    |  |
|-----------------------------------|--------------|-------------------------------------|----------|------------------------------------------------------------------------------------------------------------------|----|--|
| Maintenance                       |              |                                     |          |                                                                                                                  |    |  |
| Cellular Function and Maintenance | phagocytosis | phagocytosis of cells               | 4,30E-11 | ANXA1, CD44, CD47, CNN2, CSF2RB, DEF6, FCGR2A, FCGR2B, HCK, IRF8, ITGAM, ITGAX, ITGB2, PRKCB, RAC2, SELPLG, VAV1 | 17 |  |
| Cellular Function and Maintenance | phagocytosis | phagocytosis of leukocytes          | 1,00E-10 | ANXA1, CD44, CD47, CNN2, CSF2RB, DEF6, FCGR2A, FCGR2B, IRF8, ITGAM, ITGB2, SELPLG                                | 12 |  |
| Cellular Function and Maintenance | phagocytosis | phagocytosis of phagocytes          | 6,05E-10 | ANXA1, CD44, CD47, CNN2, CSF2RB, DEF6, FCGR2A, FCGR2B, ITGAM, ITGB2, SELPLG                                      | 11 |  |
| Cellular Function and Maintenance | phagocytosis | phagocytosis of myeloid cells       | 7,84E-09 | ANXA1, CD47, CSF2RB, FCGR2A, IRF8, ITGAM, ITGB2, SELPLG                                                          | 8  |  |
| Cellular Function and Maintenance | phagocytosis | phagocytosis of granulocytes        | 1,47E-07 | ANXA1, CD47, CSF2RB, FCGR2A, ITGAM, ITGB2, SELPLG                                                                | 7  |  |
| Cellular Function and Maintenance | phagocytosis | phagocytosis of tumor cell lines    | 3,25E-07 | ANXA1, CD44, DEF6, FCGR2A, FCGR2B, ITGAM, PRKCB                                                                  | 7  |  |
| Cellular Function and Maintenance | phagocytosis | phagocytosis of red blood cells     | 6,31E-07 | CD44, FCGR2A, HCK, ITGAM, ITGB2, RAC2                                                                            | 6  |  |
| Cellular Function and Maintenance | phagocytosis | phagocytosis of cell lines          | 8,56E-07 | ANXA1, CD44, DEF6, FCGR2A, FCGR2B, ITGAM, PRKCB, VAV1                                                            | 8  |  |
| Cellular Function and Maintenance | phagocytosis | phagocytosis of macrophages         | 1,23E-06 | ANXA1, CD44, CD47, CNN2, DEF6, FCGR2B, ITGB2                                                                     | 7  |  |
| Cellular Function and Maintenance | phagocytosis | phagocytosis of neutrophils         | 1,95E-06 | CD47, CSF2RB, FCGR2A, ITGAM, ITGB2, SELPLG                                                                       | 6  |  |
| Cellular Function and Maintenance | phagocytosis | phagocytosis of leukemia cell lines | 2,43E-06 | ANXA1, DEF6, FCGR2A, FCGR2B, PRKCB                                                                               | 5  |  |
| Cellular Function and Maintenance | organization | organization of cytoskeleton        | 1,66E-08 | ANTXR1, CD44, CD47, CLU, CXCL9, FLNA, ITK, LCK, LCP1, MARCKS, MYH9, PLEK, TRIO, VAV1                             | 14 |  |
| Cellular Function and Maintenance | selection    | selection of T lymphocytes          | 4,22E-08 | CD28, CD74, CD3D, HLA-DOA, ITK, PTPRC, SIT1, VAV1                                                                | 8  |  |

|                                   |                               |                                                |          |                                                                                                                                                                                                                                                                                                                                                                                                                               |    |  |
|-----------------------------------|-------------------------------|------------------------------------------------|----------|-------------------------------------------------------------------------------------------------------------------------------------------------------------------------------------------------------------------------------------------------------------------------------------------------------------------------------------------------------------------------------------------------------------------------------|----|--|
| Maintenance                       |                               |                                                |          |                                                                                                                                                                                                                                                                                                                                                                                                                               |    |  |
| Cellular Function and Maintenance | polarization                  | polarization of T lymphocytes                  | 4,95E-08 | CD28, CD74, IRF4, LCK, RASSF5, STAT4, TBX21, VAV1, WIPF1                                                                                                                                                                                                                                                                                                                                                                      | 9  |  |
| Cellular Function and Maintenance | generation                    | generation of T lymphocytes                    | 5,48E-08 | CD28, HLA-DQB1, IL7, IL10RA, IL2RG, ITK, JAK3, STAT4, TBX21, TNFSF13B                                                                                                                                                                                                                                                                                                                                                         | 10 |  |
| Cellular Function and Maintenance | generation                    | generation of Th1 cells                        | 7,05E-06 | CD28, JAK3, STAT4, TBX21                                                                                                                                                                                                                                                                                                                                                                                                      | 4  |  |
| Cellular Function and Maintenance | activation-induced cell death | activation-induced cell death of T lymphocytes | 3,25E-07 | CCR5, CD28, CIITA, ITK, MAP4K1, PRF1, RAC2                                                                                                                                                                                                                                                                                                                                                                                    | 7  |  |
| Cellular Function and Maintenance | reorganization                | reorganization of cytoskeleton                 | 5,81E-07 | ANTXR1, CD44, CD47, CXCL9, FLNA, ITK, LCK, MYH9, PLEK, TRIO, VAV1                                                                                                                                                                                                                                                                                                                                                             | 11 |  |
| Cellular Function and Maintenance | polymerization                | polymerization of actin                        | 6,14E-07 | CD47, DEF6, ITGAL, ITGB2, ITK, LCP2, VAV1, WIPF1                                                                                                                                                                                                                                                                                                                                                                              | 8  |  |
| Cellular Function and Maintenance | presence                      | presence of blood cells                        | 3,99E-06 | CCR7, CD44, FCGR2A, HCK, ITGAM, JAK3                                                                                                                                                                                                                                                                                                                                                                                          | 6  |  |
| Cellular Function and Maintenance | respiratory burst             | respiratory burst of leukocytes                | 1,06E-05 | HCK, IRF8, ITGAL, ITGAM, ITGAX, ITGB2, PTPRC                                                                                                                                                                                                                                                                                                                                                                                  | 7  |  |
| Cellular Function and Maintenance | proliferation                 | proliferation of thymocytes                    | 1,67E-05 | CD2, CD28, IL7, IL2RG, ITK, JAK3, LCP2, MYB (includes EG:4602)                                                                                                                                                                                                                                                                                                                                                                | 8  |  |
| Tissue Morphology                 | quantity                      | quantity of leukocytes                         | 2,16E-32 | AHR, ATM, BCL2A1, CCL5, CCR2, CCR7, CD28, CD47, CD247, CD3D, CD8A, CIITA, CNN2, CSF1R, CSF2RB, CTSS, CYTIP, DEF6, ETS1, ETV6, FCGR2A, FLI1, GF11, IKZF1, IL7, IL10RA, IL2RB, IL2RG, IL7R, IRF1, IRF4, IRF8, ITGAM, ITGB2, ITGB6, ITK, JAK3, LCK, LCP2, LTB4R, NFATC2, NOTCH2, PRF1, PTPRC, RAC2, RUNX1, RUNX2, SELL, SELPLG, SH2B3, SIT1, SLA, STAT4, TAP1, TBX21, TCF4, TGFB2, TNFSF13B, VAV1                                | 59 |  |
| Tissue Morphology                 | quantity                      | quantity of blood cells                        | 6,22E-32 | AHR, ATM, BCL2A1, CCL5, CCR2, CCR7, CD28, CD47, CD247, CD3D, CD8A, CIITA, CNN2, CSF1R, CSF2RB, CTSS, CYTIP, DEF6, ETS1, ETV6, FCGR2A, FLI1, GF11, IKZF1, IL7, IL10RA, IL2RB, IL2RG, IL7R, IRF1, IRF4, IRF8, ITGAM, ITGB2, ITGB6, ITK, JAK3, LCK, LCP2, LTB4R, MYB (includes EG:4602), NFATC2, NOTCH2, PRF1, PTPRC, RAC2, RUNX1, RUNX2, SELL, SELPLG, SH2B3, SIT1, SLA, STAT4, TAP1, TBX21, TCF4, TGFB2, THBS2, TNFSF13B, VAV1 | 61 |  |
| Tissue Morphology                 | quantity                      | quantity of mononuclear leukocytes             | 1,30E-31 | AHR, ATM, BCL2A1, CCR2, CCR7, CD28, CD247, CD3D, CIITA, CNN2, CSF2RB, CTSS, CYTIP, DEF6, ETS1, ETV6, FCGR2A, FLI1, GF11, IKZF1, IL7, IL10RA, IL2RB, IL2RG, IL7R, IRF1, ITGAM, ITGB2, ITGB6, ITK, JAK3, LCK, LCP2, NFATC2, NOTCH2, PRF1, PTPRC, RAC2, RUNX1, RUNX2, SELL, SELPLG, SH2B3, SIT1, SLA, STAT4, TAP1, TBX21, TCF4, TGFB2, TNFSF13B,                                                                                 | 52 |  |

## VAV1

|                   |          |                                            |          |                                                                                                                                                                                                                                                                                                                                                                                                                                                                                                                             |    |
|-------------------|----------|--------------------------------------------|----------|-----------------------------------------------------------------------------------------------------------------------------------------------------------------------------------------------------------------------------------------------------------------------------------------------------------------------------------------------------------------------------------------------------------------------------------------------------------------------------------------------------------------------------|----|
| Tissue Morphology | quantity | quantity of lymphocytes                    | 1,51E-31 | AHR, ATM, BCL2A1, CCR2, CCR7, CD28, CD247, CD3D, CIITA, CSF2RB, CTSS, CYTIP, DEF6, ETS1, ETV6, FCGR2A, FLI1, GFI1, IKZF1, IL7, IL10RA, IL2RB, IL2RG, IL7R, IRF1, ITGAM, ITGB2, ITGB6, ITK, JAK3, LCK, LCP2, NFATC2, NOTCH2, PRF1, PTPRC, RAC2, RUNX1, RUNX2, SELL, SELPLG, SH2B3, SIT1, SLA, STAT4, TAP1, TBX21, TCF4, TGFBR2, TNFSF13B, VAV1                                                                                                                                                                               | 51 |
| Tissue Morphology | quantity | quantity of T lymphocytes                  | 6,66E-27 | AHR, ATM, BCL2A1, CCR2, CCR7, CD28, CD247, CD3D, CIITA, CSF2RB, CTSS, DEF6, ETS1, ETV6, FLI1, GFI1, IKZF1, IL7, IL10RA, IL2RB, IL2RG, IL7R, IRF1, ITGAM, ITGB2, ITK, JAK3, LCK, LCP2, PTPRC, RUNX1, RUNX2, SELPLG, SH2B3, SIT1, TAP1, TBX21, TGFBR2, TNFSF13B, VAV1                                                                                                                                                                                                                                                         | 40 |
| Tissue Morphology | quantity | quantity of cells                          | 2,39E-26 | ADAM12, AHR, ANXA1, ATM, BCL2A1, CCL5, CCND2, CCR2, CCR5, CCR7, CD28, CD44, CD47, CD247, CD3D, CD8A, CIITA, CNN2, CSF1R, CSF2RB, CTSS, CYBB, CYTIP, DEF6, ETS1, ETV6, FCGR2A, FLI1, GFI1, GFRA1, IKZF1, IL7, IL10RA, IL2RB, IL2RG, IL7R, IRF1, IRF4, IRF8, ITGAL, ITGAM, ITGB2, ITGB6, ITK, JAK3, LCK, LCP2, LEF1, LTB4R, MMP7, MYB (includes EG:4602), MYH9, NFATC2, NOTCH2, NRP1, PRF1, PTPRC, RAC2, RUNX1, RUNX2, SELL, SELPLG, SH2B3, SH2D1A, SIT1, SLA, STAT4, TAP1, TBX21, TCF4, TGFBR2, THBS2, TNFSF13B, TRPA1, VAV1 | 75 |
| Tissue Morphology | quantity | quantity of B lymphocytes                  | 2,44E-11 | AHR, BCL2A1, CCR7, CD28, FCGR2A, IL7, IL2RG, IL7R, ITGB2, JAK3, NFATC2, NOTCH2, RAC2, SH2B3, SLA, TCF4, TGFBR2, TNFSF13B, VAV1                                                                                                                                                                                                                                                                                                                                                                                              | 19 |
| Tissue Morphology | quantity | quantity of natural killer T lymphocytes   | 8,25E-11 | CSF2RB, ETS1, IKZF1, IL2RB, IL2RG, PTPRC, TBX21, TGFBR2, VAV1                                                                                                                                                                                                                                                                                                                                                                                                                                                               | 9  |
| Tissue Morphology | quantity | quantity of intraepithelial T lymphocytes  | 2,82E-09 | IKZF1, IL2RG, IL7R, IRF1, PTPRC, TAP1                                                                                                                                                                                                                                                                                                                                                                                                                                                                                       | 6  |
| Tissue Morphology | quantity | quantity of thymocytes                     | 5,97E-08 | ATM, CCR7, CD247, ETS1, IL7, IL2RG, IL7R, ITK, JAK3, LCK, LCP2, RUNX1                                                                                                                                                                                                                                                                                                                                                                                                                                                       | 12 |
| Tissue Morphology | quantity | quantity of lymphatic system cells         | 8,81E-08 | AHR, CD8A, CNN2, CSF2RB, ETS1, FLI1, IKZF1, IRF8, ITGB2, JAK3, RAC2, SELL, SELPLG, SH2B3, STAT4, THBS2                                                                                                                                                                                                                                                                                                                                                                                                                      | 16 |
| Tissue Morphology | quantity | quantity of antigen presenting cells       | 1,22E-07 | CCR2, CCR7, CD47, CSF1R, CTSS, IKZF1, IRF1, IRF4, IRF8, ITGB2, ITGB6, SELPLG, SH2B3, STAT4                                                                                                                                                                                                                                                                                                                                                                                                                                  | 14 |
| Tissue Morphology | quantity | quantity of bone marrow cells              | 1,73E-07 | AHR, CD8A, CNN2, CSF2RB, FLI1, IKZF1, IRF8, ITGB2, JAK3, RAC2, SELL, SELPLG, SH2B3, STAT4, THBS2                                                                                                                                                                                                                                                                                                                                                                                                                            | 15 |
| Tissue Morphology | quantity | quantity of myeloid cells                  | 2,13E-07 | AHR, CD8A, CNN2, CSF2RB, FLI1, IKZF1, IRF8, ITGB2, JAK3, RAC2, SELL, SELPLG, SH2B3, STAT4                                                                                                                                                                                                                                                                                                                                                                                                                                   | 14 |
| Tissue Morphology | quantity | quantity of natural killer cells           | 2,46E-07 | ETS1, IL2RB, IL2RG, IRF1, JAK3, PRF1, PTPRC, TBX21                                                                                                                                                                                                                                                                                                                                                                                                                                                                          | 8  |
| Tissue Morphology | quantity | quantity of granulocytes                   | 3,16E-07 | AHR, CD8A, CNN2, CSF2RB, FLI1, IRF8, ITGB2, JAK3, RAC2, SELL, SELPLG, SH2B3, STAT4                                                                                                                                                                                                                                                                                                                                                                                                                                          | 13 |
| Tissue Morphology | quantity | quantity of pre-B lymphocytes              | 1,23E-06 | CD28, IL7, IL2RG, IL7R, SH2B3, TCF4, TNFSF13B                                                                                                                                                                                                                                                                                                                                                                                                                                                                               | 7  |
| Tissue Morphology | quantity | quantity of dendritic cells                | 2,13E-06 | CCR2, CCR7, CD47, IKZF1, IRF1, IRF4, IRF8, ITGB2                                                                                                                                                                                                                                                                                                                                                                                                                                                                            | 8  |
| Tissue Morphology | quantity | quantity of hematopoietic progenitor cells | 2,87E-06 | FLI1, IKZF1, IRF8, JAK3, MYB (includes EG:4602), RUNX1, SH2B3, STAT4, THBS2                                                                                                                                                                                                                                                                                                                                                                                                                                                 | 9  |
| Tissue Morphology | quantity | quantity of phagocytes                     | 4,80E-06 | AHR, CCR2, CNN2, CSF1R, CTSS, ITGB2, ITGB6, JAK3, RAC2, SELL, SELPLG, SH2B3, STAT4                                                                                                                                                                                                                                                                                                                                                                                                                                          | 13 |

|                                   |               |                                         |          |                                                                                                                                                                                                                                                                                                                                                                                                                                                                                                                                                                                                                                                                                                                   |     |
|-----------------------------------|---------------|-----------------------------------------|----------|-------------------------------------------------------------------------------------------------------------------------------------------------------------------------------------------------------------------------------------------------------------------------------------------------------------------------------------------------------------------------------------------------------------------------------------------------------------------------------------------------------------------------------------------------------------------------------------------------------------------------------------------------------------------------------------------------------------------|-----|
| Tissue Morphology                 | quantity      | quantity of pro-B lymphocytes           | 1,52E-05 | CD28, IL7, IL2RG, IL7R, TCF4                                                                                                                                                                                                                                                                                                                                                                                                                                                                                                                                                                                                                                                                                      | 5   |
| Cellular Growth and Proliferation | proliferation | proliferation of mononuclear leukocytes | 4,96E-29 | ANXA1, ATM, CCND2, CCR2, CCR5, CD2, CD28, CD44, CD47, CD48, CD74, CD84, CD209, CD247, CD8A, CSF1R, CSF2RB, DEF6, DGKA, FCGR2B, FYB, GFI1, HCK, HLA-DRB1, IKZF1, IL7, IL2RB, IL2RG, IL7R, IRF1, IRF4, IRF8, ITGAL, ITGAM, ITGAX, ITGB2, ITK, JAK3, KLRK1, LCK, LCP2, LEF1, MYB (includes EG:4602), NFATC2, PRKCB, PTPRC, RAC2, SASH3, SH2B3, SH2D1A, SLAMF7, STAT4, TGFB2, TNFSF13B, TRD@, VAV1, WIPF1                                                                                                                                                                                                                                                                                                             | 57  |
| Cellular Growth and Proliferation | proliferation | proliferation of blood cells            | 5,44E-29 | ANXA1, ATM, CCND2, CCR2, CCR5, CD2, CD28, CD44, CD47, CD48, CD74, CD84, CD209, CD247, CD8A, CSF1R, CSF2RB, DEF6, DGKA, FCGR2B, FLI1, FYB, GFI1, HCK, HLA-DRB1, IKZF1, IL7, IL10RA, IL2RB, IL2RG, IL7R, IRF1, IRF4, IRF8, ITGAL, ITGAM, ITGAX, ITGB2, ITK, JAK3, KLRK1, LCK, LCP2, LEF1, MYB (includes EG:4602), NFATC2, PRKCB, PTPRC, RAC2, RUNX1, SASH3, SH2B3, SH2D1A, SLAMF7, STAT4, TGFB2, TNFSF13B, TRD@, VAV1, WIPF1                                                                                                                                                                                                                                                                                        | 60  |
| Cellular Growth and Proliferation | proliferation | proliferation of leukocytes             | 1,01E-28 | ANXA1, ATM, CCND2, CCR2, CCR5, CD2, CD28, CD44, CD47, CD48, CD74, CD84, CD209, CD247, CD8A, CSF1R, CSF2RB, DEF6, DGKA, FCGR2B, FYB, GFI1, HCK, HLA-DRB1, IKZF1, IL7, IL10RA, IL2RB, IL2RG, IL7R, IRF1, IRF4, IRF8, ITGAL, ITGAM, ITGAX, ITGB2, ITK, JAK3, KLRK1, LCK, LCP2, LEF1, MYB (includes EG:4602), NFATC2, PRKCB, PTPRC, RAC2, SASH3, SH2B3, SH2D1A, SLAMF7, STAT4, TGFB2, TNFSF13B, TRD@, VAV1, WIPF1                                                                                                                                                                                                                                                                                                     | 58  |
| Cellular Growth and Proliferation | proliferation | proliferation of lymphocytes            | 3,49E-28 | ANXA1, ATM, CCND2, CCR2, CCR5, CD2, CD28, CD44, CD47, CD48, CD74, CD84, CD209, CD247, CD8A, CSF2RB, DEF6, DGKA, FCGR2B, FYB, GFI1, HCK, HLA-DRB1, IKZF1, IL7, IL2RB, IL2RG, IL7R, IRF1, IRF4, IRF8, ITGAL, ITGAM, ITGAX, ITGB2, ITK, JAK3, KLRK1, LCK, LCP2, LEF1, MYB (includes EG:4602), NFATC2, PRKCB, PTPRC, RAC2, SASH3, SH2B3, SH2D1A, SLAMF7, STAT4, TGFB2, TNFSF13B, TRD@, VAV1, WIPF1                                                                                                                                                                                                                                                                                                                    | 56  |
| Cellular Growth and Proliferation | proliferation | proliferation of normal cells           | 3,88E-24 | AHR, ANXA1, ATM, BCL2A1, CCL5, CCND2, CCR2, CCR5, CCR7, CD2, CD28, CD44, CD47, CD48, CD74, CD84, CD209, CD247, CD8A, CIITA, CLDN11, CLU, CSF1R, CSF2RB, CXCL9, CXCL16, DEF6, DGKA, FCGR2B, FLI1, FYB, GFI1, GZMB, HCK, HLA-DPB1, HLA-DRB1, IKZF1, IL7, IL10RA, IL2RB, IL2RG, IL7R, IRF1, IRF4, IRF8, ITGAL, ITGAM, ITGAX, ITGB2, ITK, JAK3, KLRK1, LCK, LCP2, LEF1, LTB4R, MMP7, MYB (includes EG:4602), NDP, NFATC2, NRP1, PRKCB, PTPRC, RAC2, RUNX1, RUNX2, SASH3, SH2B3, SH2D1A, SLAMF7, STAT4, TCF4, TGFB2, TIMP2, TNFSF13B, TRD@, VAV1, WIPF1                                                                                                                                                                | 78  |
| Cellular Growth and Proliferation | proliferation | proliferation of T lymphocytes          | 1,06E-23 | ANXA1, ATM, CCR2, CCR5, CD2, CD28, CD44, CD47, CD48, CD74, CD84, CD209, CD247, CD8A, CSF2RB, DEF6, DGKA, FYB, GFI1, HLA-DRB1, IKZF1, IL7, IL2RB, IL2RG, IL7R, ITGAL, ITGAM, ITGAX, ITGB2, ITK, JAK3, KLRK1, LCK, LCP2, MYB (includes EG:4602), NFATC2, PTPRC, RAC2, SASH3, SH2D1A, STAT4, TGFB2, TNFSF13B, TRD@, VAV1, WIPF1                                                                                                                                                                                                                                                                                                                                                                                      | 46  |
| Cellular Growth and Proliferation | proliferation | proliferation of eukaryotic cells       | 3,68E-23 | AHR, ANXA1, ATM, BCL2A1, CASP1, CCL5, CCND2, CCR2, CCR5, CCR7, CD2, CD28, CD44, CD47, CD48, CD74, CD84, CD209, CD247, CD8A, CIITA, CLDN11, CLEC7A, CLU, CNN2, CSF1R, CSF2RB, CTSS, CXCL9, CXCL16, CYBB, DEF6, DGKA, ETS1, ETV6, FCGR2B, FLI1, FYB, GFI1, GZMB, HCK, HHEX, HLA-DPB1, HLA-DRB1, IKZF1, IL7, IL10RA, IL2RB, IL2RG, IL7R, IRF1, IRF4, IRF8, ITGAL, ITGAM, ITGAX, ITGB2, ITK, JAK3, KLRK1, LCK, LCP2, LEF1, LTB4R, MMP7, MYB (includes EG:4602), NDP, NFATC2, NRP1, PRKCB, PTPRC, PTPRE, RAC2, RASGRP4, RASSF5, RUNX1, RUNX2, SASH3, SH2B3, SH2D1A, SLAMF7, STAT4, TCF4, TFPI2, TGFB2, THBS2, TIMP2, TNFSF13B, TRD@, VAV1, WIPF1                                                                       | 91  |
| Cellular Growth and Proliferation | proliferation | proliferation of cells                  | 3,44E-22 | ADRA2A, AHR, ANXA1, ATM, BCL11B, BCL2A1, CASP1, CCL5, CCND2, CCR2, CCR5, CCR7, CD2, CD28, CD44, CD47, CD48, CD74, CD84, CD209, CD247, CD8A, CDC7, CIITA, CLDN11, CLEC7A, CLU, CNN2, CSF1R, CSF2RB, CTSS, CXCL9, CXCL16, CYBB, DEF6, DGKA, ETS1, ETV6, FCGR2B, FLI1, FYB, GFI1, GZMB, HCK, HCLS1, HHEX, HLA-DPB1, HLA-DRB1, IKZF1, IL7, IL10RA, IL2RB, IL2RG, IL7R, IRF1, IRF4, IRF8, ITGAL, ITGAM, ITGAX, ITGB2, ITK, JAK3, KLRK1, LAMP3, LCK, LCP2, LEF1, LTB4R, MAP4K1, MMP7, MYB (includes EG:4602), NDP, NFATC2, NOD2, NOTCH2, NRP1, PRKCB, PTPRC, PTPRE, RAC2, RASGRP4, RASSF5, RUNX1, RUNX2, SASH3, SH2B3, SH2D1A, SIRPG, SLAMF7, STAT4, TCF4, TFPI2, TGFB2, THBS2, TIMP2, TNFSF13B, TRD@, VAV1, VIM, WIPF1 | 101 |
| Cellular Growth and Proliferation | proliferation | proliferation of B lymphocytes          | 1,01E-11 | CCND2, CD44, CD74, CD8A, FCGR2B, HCK, IL7, IL2RG, IL7R, IRF4, IRF8, LEF1, NFATC2, PRKCB, PTPRC, SASH3, SH2B3, SLAMF7, TNFSF13B, VAV1, WIPF1                                                                                                                                                                                                                                                                                                                                                                                                                                                                                                                                                                       | 21  |

|                                   |               |                                         |          |                                                                                                                                                                                                                                                                                                                                                                                                                                                                   |    |
|-----------------------------------|---------------|-----------------------------------------|----------|-------------------------------------------------------------------------------------------------------------------------------------------------------------------------------------------------------------------------------------------------------------------------------------------------------------------------------------------------------------------------------------------------------------------------------------------------------------------|----|
| Cellular Growth and Proliferation | proliferation | proliferation of leukocyte cell lines   | 8,85E-11 | CD28, CD44, CD8A, CLEC7A, CSF1R, CSF2RB, ETV6, HCK, IL7, IL10RA, IL2RB, IL2RG, IL7R, JAK3, MYB (includes EG:4602), PTPRC, RASGRP4, RUNX1, SH2B3                                                                                                                                                                                                                                                                                                                   | 19 |
| Cellular Growth and Proliferation | proliferation | proliferation of cell lines             | 1,51E-08 | AHR, ANXA1, ATM, CCND2, CD28, CD44, CD8A, CLEC7A, CLU, CNN2, CSF1R, CSF2RB, CYBB, DGKA, ETS1, ETV6, FLI1, GFI1, HCK, HHEX, IL7, IL10RA, IL2RB, IL2RG, IL7R, IRF1, IRF8, JAK3, LEF1, MYB (includes EG:4602), NRP1, PRKCB, PTPRC, RASGRP4, RASSF5, RUNX1, RUNX2, SH2B3, TFPI2, TGFB2, THBS2, TIMP2, TNFSF13B                                                                                                                                                        | 43 |
| Cellular Growth and Proliferation | proliferation | proliferation of naive lymphocytes      | 8,13E-07 | CD28, DEF6, IL7, ITGAL, ITGB2, KLRK1, SLAMF7                                                                                                                                                                                                                                                                                                                                                                                                                      | 7  |
| Cellular Growth and Proliferation | proliferation | proliferation of naive T lymphocytes    | 4,97E-06 | CD28, DEF6, IL7, ITGAL, ITGB2, KLRK1                                                                                                                                                                                                                                                                                                                                                                                                                              | 6  |
| Cellular Growth and Proliferation | proliferation | proliferation of lymphatic system cells | 9,94E-06 | CCND2, CD44, CD8A, CSF1R, IL7, IL2RG, IRF8, LTB4R, PTPRC, RUNX1, SH2B3                                                                                                                                                                                                                                                                                                                                                                                            | 11 |
| Cellular Growth and Proliferation | proliferation | proliferation of thymocytes             | 1,67E-05 | CD2, CD28, IL7, IL2RG, ITK, JAK3, LCP2, MYB (includes EG:4602)                                                                                                                                                                                                                                                                                                                                                                                                    | 8  |
| Cellular Growth and Proliferation | growth        | growth of eukaryotic cells              | 1,25E-12 | ACSL5, AHR, AKAP12, ANTXR1, ANXA1, ATM, CASP1, CCND2, CD2, CD28, CD44, CDC7, CLU, COL6A3, CSF1R, CSF2RB, EMILIN2, ETS1, ETV6, FLI1, GABRP, GBP2, GFI1, GFRA1, GZMB, IKZF1, IL7, IL10RA, IL2RB, IL2RG, IL7R, IRF1, IRF8, JAK3, LCP1, LCP2, LEF1, MMP7, MYB (includes EG:4602), NFATC2, NOTCH2, NRP1, PRF1, PRKCB, PTPN22, RASGRP4, RASSF5, RUNX1, RUNX2, SH2B3, STAT4, TGFB2, THBS2, TIMP2, TNFSF13B, TPM1, VAV1                                                   | 57 |
| Cellular Growth and Proliferation | growth        | growth of blood cells                   | 2,10E-11 | AHR, CCND2, CD2, CD28, CSF1R, GFI1, IL7, IL10RA, IL2RB, IL7R, IRF1, IRF8, JAK3, LCP2, MYB (includes EG:4602), NFATC2, PRF1, RUNX1, SH2B3, STAT4, TNFSF13B                                                                                                                                                                                                                                                                                                         | 21 |
| Cellular Growth and Proliferation | growth        | growth of leukocytes                    | 4,78E-10 | AHR, CD2, CD28, CSF1R, GFI1, IL7, IL10RA, IL2RB, IL7R, IRF1, IRF8, JAK3, LCP2, NFATC2, PRF1, SH2B3, STAT4, TNFSF13B                                                                                                                                                                                                                                                                                                                                               | 18 |
| Cellular Growth and Proliferation | growth        | growth of cells                         | 9,89E-10 | ACSL5, ADAM12, AHR, AKAP12, ANTXR1, ANXA1, ATM, BCL2A1, CASP1, CCND2, CD2, CD28, CD44, CDC7, CLU, COL6A3, CSF1R, CSF2RB, CXCL16, DGKA, EMILIN2, ETS1, ETV6, FLI1, GABRP, GBP2, GFI1, GFRA1, GZMB, HNRNP, IKZF1, IL7, IL10RA, IL2RB, IL2RG, IL7R, IRF1, IRF8, ITGB6, JAK3, LCP1, LCP2, LEF1, MMP7, MYB (includes EG:4602), NFATC2, NOTCH2, NRP1, PRF1, PRKCB, PTPN22, RASGRP4, RASSF5, RUNX1, RUNX2, SH2B3, STAT4, TAP1, TGFB2, THBS2, TIMP2, TNFSF13B, TPM1, VAV1 | 64 |
| Cellular Growth and Proliferation | growth        | growth of normal cells                  | 2,69E-09 | AHR, ATM, CCND2, CD2, CD28, CDC7, CSF1R, GFI1, IL7, IL10RA, IL2RB, IL7R, IRF1, IRF8, JAK3, LCP2, MYB (includes EG:4602), NFATC2, PRF1, RUNX1, RUNX2, SH2B3, STAT4, TGFB2, TIMP2, TNFSF13B, TPM1, VAV1                                                                                                                                                                                                                                                             | 28 |
| Cellular Growth and Proliferation | growth        | growth of lymphocytes                   | 4,91E-09 | AHR, CD2, CD28, GFI1, IL7, IL2RB, IL7R, IRF1, JAK3, LCP2, NFATC2, PRF1, SH2B3, STAT4, TNFSF13B                                                                                                                                                                                                                                                                                                                                                                    | 15 |
| Cellular Growth and Proliferation | growth        | growth of cell lines                    | 3,35E-08 | ACSL5, AHR, AKAP12, ANTXR1, ANXA1, ATM, CASP1, CD28, CD44, CLU, COL6A3, CSF1R, CSF2RB, EMILIN2, ETS1, ETV6, FLI1, GABRP, GBP2, GZMB, IKZF1, IL7, IL2RB, IL2RG, IRF1, LCP1, LEF1, MMP7, NOTCH2, NRP1, PRKCB, PTPN22, RASGRP4, RASSF5, RUNX1, RUNX2, SH2B3, TGFB2, THBS2, TIMP2, TPM1                                                                                                                                                                               | 41 |
| Cellular Growth and Proliferation | expansion     | expansion of blood cells                | 2,02E-11 | AHR, CCND2, CD2, CD28, GFI1, IL7, IL10RA, IL7R, IRF1, JAK3, LCP2, MYB (includes EG:4602), NFATC2, PRF1, RUNX1, SH2B3, STAT4, TNFSF13B                                                                                                                                                                                                                                                                                                                             | 18 |
| Cellular Growth and Proliferation | expansion     | expansion of                            | 1,84E-   | AHR, CD2, CD28, GFI1, IL7, IL7R, IRF1, JAK3, LCP2, NFATC2, PRF1, SH2B3,                                                                                                                                                                                                                                                                                                                                                                                           | 14 |

|                                        |             |                                 |          |                                                                                                                                                                                                                                                                                                                                                                                                                     |    |
|----------------------------------------|-------------|---------------------------------|----------|---------------------------------------------------------------------------------------------------------------------------------------------------------------------------------------------------------------------------------------------------------------------------------------------------------------------------------------------------------------------------------------------------------------------|----|
| Growth and Proliferation               |             | lymphocytes                     | 09       | STAT4, TNFSF13B                                                                                                                                                                                                                                                                                                                                                                                                     |    |
| Cellular Growth and Proliferation      | expansion   | expansion of leukocytes         | 1,93E-09 | AHR, CD2, CD28, GFI1, IL7, IL10RA, IL7R, IRF1, JAK3, LCP2, NFATC2, PRF1, SH2B3, STAT4, TNFSF13B                                                                                                                                                                                                                                                                                                                     | 15 |
| Cellular Growth and Proliferation      | expansion   | expansion of T lymphocytes      | 2,25E-07 | AHR, CD2, CD28, GFI1, IL7, IRF1, JAK3, LCP2, PRF1, STAT4, TNFSF13B                                                                                                                                                                                                                                                                                                                                                  | 11 |
| Cellular Growth and Proliferation      | generation  | generation of leukocytes        | 3,87E-10 | CD28, HLA-DQB1, IL7, IL10RA, IL2RG, IL7R, IRF4, IRF8, ITK, JAK3, NOTCH2, STAT4, TBX21, TNFSF13B                                                                                                                                                                                                                                                                                                                     | 14 |
| Cellular Growth and Proliferation      | generation  | generation of lymphocytes       | 4,39E-10 | CD28, HLA-DQB1, IL7, IL10RA, IL2RG, IL7R, IRF4, ITK, JAK3, NOTCH2, STAT4, TBX21, TNFSF13B                                                                                                                                                                                                                                                                                                                           | 13 |
| Cellular Growth and Proliferation      | generation  | generation of normal cells      | 3,09E-08 | ATM, CD28, HLA-DQB1, IL7, IL10RA, IL2RG, IL7R, IRF4, IRF8, ITK, JAK3, NOTCH2, STAT4, TBX21, TNFSF13B                                                                                                                                                                                                                                                                                                                | 15 |
| Cellular Growth and Proliferation      | generation  | generation of T lymphocytes     | 5,48E-08 | CD28, HLA-DQB1, IL7, IL10RA, IL2RG, ITK, JAK3, STAT4, TBX21, TNFSF13B                                                                                                                                                                                                                                                                                                                                               | 10 |
| Cellular Growth and Proliferation      | generation  | generation of Th1 cells         | 7,05E-06 | CD28, JAK3, STAT4, TBX21                                                                                                                                                                                                                                                                                                                                                                                            | 4  |
| Cellular Growth and Proliferation      | stimulation | stimulation of T lymphocytes    | 1,85E-06 | CD2, CD28, CD74, CD209, IL7, KLRK1, PTPRC, TNFSF13B                                                                                                                                                                                                                                                                                                                                                                 | 8  |
| Cellular Growth and Proliferation      | stimulation | stimulation of cells            | 2,70E-06 | CCL5, CCND2, CD2, CD28, CD74, CD209, CD8A, IL7, IL2RB, KLRK1, PTPRC, RASGRP4, TNFSF13B                                                                                                                                                                                                                                                                                                                              | 13 |
| Cellular Growth and Proliferation      | stimulation | stimulation of eukaryotic cells | 1,40E-05 | CCL5, CCND2, CD2, CD28, CD74, CD209, CD8A, IL7, IL2RB, KLRK1, PTPRC, TNFSF13B                                                                                                                                                                                                                                                                                                                                       | 12 |
| Cellular Growth and Proliferation      | formation   | formation of eukaryotic cells   | 4,76E-06 | ADAM12, CCL5, CCR5, CD44, CD47, CLU, CSF1R, DEF6, IKZF1, IL7, IL7R, LCP2, MYB (includes EG:4602), MYH9, NDP, RUNX2, TGFBR2                                                                                                                                                                                                                                                                                          | 17 |
| Cell-To-Cell Signaling and Interaction | activation  | activation of leukocytes        | 2,13E-26 | ANXA1, CCL5, CCR2, CD2, CD28, CD44, CD47, CD48, CD74, CD209, CD247, CD1C, CD300A, CD8A, CLEC7A, CSF1R, CXCL9, DEF6, FCGR2A, FCGR2B, FYB, GFI1, GZMA, GZMB, HCK, HLA-C, HLA-DMB, HLA-DOA, HLA-DQB1, HLA-DRA, HLA-DRB1, IL7, IL2RB, ITGAL, ITGAM, ITGB2, ITGB6, ITK, JAK3, KLRK1, LCK, LCP2, NFATC2, PRF1, PTPRC, SELL, SIRPG, SIT1, STAT4, TBX21, TNFSF13B, VAV1                                                     | 52 |
| Cell-To-Cell Signaling and Interaction | activation  | activation of normal cells      | 1,71E-24 | ANXA1, ATM, BCL2A1, CASP1, CCL5, CCR2, CD2, CD28, CD44, CD47, CD48, CD74, CD209, CD247, CD1C, CD300A, CD8A, CLEC7A, CSF1R, CXCL9, CYBB, DEF6, FCGR2A, FCGR2B, FYB, GFI1, GZMA, GZMB, HCK, HLA-C, HLA-DMB, HLA-DOA, HLA-DQB1, HLA-DRA, HLA-DRB1, IL7, IL2RB, ITGAL, ITGAM, ITGB2, ITGB6, ITK, JAK3, KLRK1, LCK, LCP2, NFATC2, PRF1, PTPRC, SELL, SIRPG, SIT1, STAT4, TBX21, TNFSF13B, VAV1, VIM                      | 57 |
| Cell-To-Cell Signaling and Interaction | activation  | activation of cells             | 1,80E-24 | ACSL5, ANXA1, ATM, BCL2A1, CASP1, CCL5, CCR2, CD2, CD28, CD44, CD47, CD48, CD74, CD209, CD247, CD1C, CD300A, CD8A, CLEC7A, CSF1R, CXCL9, CYBB, DEF6, FCGR2A, FCGR2B, FYB, GFI1, GZMA, GZMB, HCK, HLA-C, HLA-DMB, HLA-DOA, HLA-DQB1, HLA-DRA, HLA-DRB1, IL7, IL2RB, IL2RG, ITGAL, ITGAM, ITGAX, ITGB2, ITGB6, ITK, JAK3, KLRK1, LCK, LCP2, NFATC2, PRF1, PTPRC, SELL, SIRPG, SIT1, STAT4, TBX21, TNFSF13B, VAV1, VIM | 60 |

|                                        |            |                                        |          |                                                                                                                                                                                                                                                                                                                                                                                                       |    |
|----------------------------------------|------------|----------------------------------------|----------|-------------------------------------------------------------------------------------------------------------------------------------------------------------------------------------------------------------------------------------------------------------------------------------------------------------------------------------------------------------------------------------------------------|----|
| Cell-To-Cell Signaling and Interaction | activation | activation of eukaryotic cells         | 9,38E-24 | ACSL5, ANXA1, ATM, BCL2A1, CASP1, CCL5, CCR2, CD2, CD28, CD44, CD47, CD48, CD74, CD209, CD247, CD1C, CD300A, CD8A, CLEC7A, CSF1R, CXCL9, CYBB, DEF6, FCGR2A, FCGR2B, FYB, GFI1, GZMA, GZMB, HCK, HLA-C, HLA-DMB, HLA-DOA, HLA-DQB1, HLA-DRA, HLA-DRB1, IL7, IL2RB, ITGAL, ITGAM, ITGB2, ITGB6, ITK, JAK3, KLRK1, LCK, LCP2, NFATC2, PRF1, PTPRC, SELL, SIRPG, SIT1, STAT4, TBX21, TNFSF13B, VAV1, VIM | 58 |
| Cell-To-Cell Signaling and Interaction | activation | activation of lymphocytes              | 1,59E-19 | CCL5, CCR2, CD2, CD28, CD44, CD47, CD48, CD209, CD247, CD1C, CD8A, CLEC7A, DEF6, FCGR2A, FCGR2B, GFI1, GZMA, GZMB, HLA-DRA, HLA-DRB1, IL7, IL2RB, ITGAL, ITGB2, ITK, JAK3, KLRK1, LCK, NFATC2, PRF1, PTPRC, SIRPG, SIT1, STAT4, TBX21, TNFSF13B, VAV1                                                                                                                                                 | 37 |
| Cell-To-Cell Signaling and Interaction | activation | activation of T lymphocytes            | 7,00E-19 | CCL5, CCR2, CD2, CD28, CD44, CD47, CD48, CD209, CD247, CD8A, CLEC7A, DEF6, GFI1, GZMA, GZMB, HLA-DRA, HLA-DRB1, IL7, IL2RB, ITGAL, ITGB2, ITK, JAK3, LCK, NFATC2, PRF1, PTPRC, SIRPG, SIT1, STAT4, TBX21, VAV1                                                                                                                                                                                        | 32 |
| Cell-To-Cell Signaling and Interaction | activation | activation of mast cells               | 4,95E-08 | CCL5, CCR2, CD48, CD300A, FCGR2A, FCGR2B, FYB, ITGAM, LCP2                                                                                                                                                                                                                                                                                                                                            | 9  |
| Cell-To-Cell Signaling and Interaction | activation | activation of natural killer cells     | 4,75E-07 | CCL5, CD2, CD28, CD44, FCGR2A, IL2RB, ITGAL, ITGB2, KLRK1, PRF1, STAT4                                                                                                                                                                                                                                                                                                                                | 11 |
| Cell-To-Cell Signaling and Interaction | activation | activation of antigen presenting cells | 5,10E-06 | CCL5, CD74, CD209, CSF1R, FCGR2A, HCK, HLA-C, HLA-DMB, HLA-DOA, HLA-DQB1, IL7, ITGB6, STAT4                                                                                                                                                                                                                                                                                                           | 13 |
| Cell-To-Cell Signaling and Interaction | binding    | binding of blood cells                 | 7,83E-19 | ADRA2A, CCL5, CCR5, CD2, CD44, CD47, CD48, CD84, CD209, CXCL9, FCGR2A, FCGR2B, FYB, HCK, IL7, IRF8, ITGAL, ITGAM, ITGAX, ITGB2, ITK, KLRK1, LCK, LCP2, MRC1, NFATC2, PTPRC, SELL, SELPLG                                                                                                                                                                                                              | 29 |
| Cell-To-Cell Signaling and Interaction | binding    | binding of leukocytes                  | 3,45E-18 | CCL5, CCR5, CD2, CD44, CD47, CD48, CD209, CXCL9, FCGR2A, FCGR2B, FYB, HCK, IL7, ITGAL, ITGAM, ITGAX, ITGB2, ITK, KLRK1, LCK, LCP2, MRC1, NFATC2, PTPRC, SELL, SELPLG                                                                                                                                                                                                                                  | 26 |
| Cell-To-Cell Signaling and Interaction | binding    | binding of normal cells                | 9,64E-16 | ADRA2A, CCL5, CCR5, CD2, CD44, CD47, CD48, CD84, CD209, CXCL9, FCGR2A, FCGR2B, FYB, HCK, IL7, IRF8, ITGAL, ITGAM, ITGAX, ITGB2, ITK, KLRK1, LCK, LCP2, MRC1, NFATC2, NRP1, PTPRC, SELL, SELPLG, THBS2                                                                                                                                                                                                 | 31 |
| Cell-To-Cell Signaling and Interaction | binding    | binding of cells                       | 8,90E-15 | ADRA2A, CCL5, CCR5, CD2, CD28, CD44, CD47, CD48, CD74, CD84, CD209, CLEC7A, CXCL9, FCGR2A, FCGR2B, FYB, GFRA1, GZMB, HCK, IL7, IL2RG, IRF8, ITGAL, ITGAM, ITGAX, ITGB2, ITK, KLRK1, LCK, LCP2, MRC1, NFATC2, NRP1, PTPRC, SELL, SELPLG, THBS2                                                                                                                                                         | 37 |
| Cell-To-Cell Signaling and Interaction | binding    | binding of mononuclear leukocytes      | 3,00E-14 | CCL5, CCR5, CD2, CD44, CD47, CXCL9, FYB, IL7, ITGAL, ITGAM, ITGB2, ITK, KLRK1, LCK, LCP2, NFATC2, SELL, SELPLG                                                                                                                                                                                                                                                                                        | 18 |
| Cell-To-Cell Signaling and Interaction | binding    | binding of eukaryotic cells            | 2,22E-13 | ADRA2A, CCL5, CCR5, CD2, CD44, CD47, CD48, CD84, CD209, CLEC7A, CXCL9, FCGR2A, FCGR2B, FYB, GFRA1, HCK, IL7, IL2RG, IRF8, ITGAL, ITGAM, ITGAX, ITGB2, ITK, KLRK1, LCK, LCP2, MRC1, NFATC2, NRP1, PTPRC, SELL, SELPLG, THBS2                                                                                                                                                                           | 34 |
| Cell-To-Cell Signaling and Interaction | binding    | binding of lymphocytes                 | 3,03E-13 | CCL5, CD2, CD44, CD47, CXCL9, FYB, IL7, ITGAL, ITGB2, ITK, KLRK1, LCK, LCP2, NFATC2, SELL, SELPLG                                                                                                                                                                                                                                                                                                     | 16 |
| Cell-To-Cell Signaling and Interaction | binding    | binding of T lymphocytes               | 2,04E-11 | CCL5, CD2, CD47, CXCL9, FYB, IL7, ITGAL, ITGB2, ITK, KLRK1, LCK, LCP2, SELPLG                                                                                                                                                                                                                                                                                                                         | 13 |
| Cell-To-Cell Signaling and Interaction | binding    | binding of leukemia cell lines         | 1,65E-09 | CCR5, CD47, CD209, FYB, ITGAL, ITGAM, ITGB2, KLRK1, LCK, SELL, SELPLG                                                                                                                                                                                                                                                                                                                                 | 11 |
| Cell-To-Cell Signaling and Interaction | binding    | binding of cell lines                  | 8,94E-09 | CCR5, CD2, CD44, CD47, CD48, CD209, CLEC7A, CXCL9, FCGR2A, FYB, IL7, IL2RG, ITGAL, ITGAM, ITGAX, ITGB2, KLRK1, LCK, NRP1, SELL, SELPLG                                                                                                                                                                                                                                                                | 21 |



|                                        |          |                                                    |          |                                                                                                                                                                                                                                                                                                                                                             |    |
|----------------------------------------|----------|----------------------------------------------------|----------|-------------------------------------------------------------------------------------------------------------------------------------------------------------------------------------------------------------------------------------------------------------------------------------------------------------------------------------------------------------|----|
| Interaction                            |          |                                                    |          |                                                                                                                                                                                                                                                                                                                                                             |    |
| Cell-To-Cell Signaling and Interaction | binding  | binding of tumor cell lines                        | 1,09E-08 | CCR5, CD44, CD47, CD209, CLEC7A, CXCL9, FCGR2A, FYB, ITGAL, ITGAM, ITGB2, KLRK1, LCK, NRP1, SELL, SELPLG                                                                                                                                                                                                                                                    | 16 |
| Cell-To-Cell Signaling and Interaction | binding  | binding of phagocytes                              | 2,27E-07 | CD2, CD209, FCGR2A, HCK, ITGAL, ITGAM, ITGB2, PTPRC, SELL, SELPLG                                                                                                                                                                                                                                                                                           | 10 |
| Cell-To-Cell Signaling and Interaction | binding  | binding of peripheral blood leukocytes             | 3,97E-06 | CCR5, ITGAM, ITGB2, LCP2                                                                                                                                                                                                                                                                                                                                    | 4  |
| Cell-To-Cell Signaling and Interaction | binding  | binding of lymphatic system cells                  | 8,67E-06 | CCL5, CD47, FCGR2A, HCK, ITGAM, ITGB2, SELL, SELPLG                                                                                                                                                                                                                                                                                                         | 8  |
| Cell-To-Cell Signaling and Interaction | binding  | binding of antigen presenting cells                | 1,22E-05 | CD2, CD209, FYB, ITGAL, LCK, MRC1, PTPRC                                                                                                                                                                                                                                                                                                                    | 7  |
| Cell-To-Cell Signaling and Interaction | binding  | binding of peripheral blood mononuclear leukocytes | 1,52E-05 | CCR5, ITGAM, ITGB2                                                                                                                                                                                                                                                                                                                                          | 3  |
| Cell-To-Cell Signaling and Interaction | adhesion | adhesion of cells                                  | 4,20E-18 | ADAM12, AMICA1, ANXA1, ARHGDI1B, CCL5, CCR2, CCR5, CD2, CD28, CD44, CD47, CD48, CD84, CD96, CD209, CD8A, CLDN11, CLEC7A, CLU, CXCL9, CXCL16, CYTIP, EMB, ETS1, FCGR2A, FYB, GFI1, GFRA1, GZMB, HCK, IL7, ITGAL, ITGAM, ITGAX, ITGB2, ITGB6, ITK, LCK, LCP1, LTB4R, MARCKS, MYH9, MYO1F, PARVG, PTPRC, RAC2, RASSF5, ROBO1, SELL, SELPLG, TGFB2, THBS2, VAV1 | 53 |
| Cell-To-Cell Signaling and Interaction | adhesion | adhesion of leukocytes                             | 5,52E-17 | ANXA1, CCL5, CD2, CD28, CD44, CD47, CD48, CD209, CXCL9, FCGR2A, FYB, HCK, IL7, ITGAL, ITGAM, ITGAX, ITGB2, ITK, LCP1, LTB4R, PTPRC, RAC2, RASSF5, SELL, SELPLG, TGFB2, THBS2, VAV1                                                                                                                                                                          | 28 |
| Cell-To-Cell Signaling and Interaction | adhesion | adhesion of mononuclear leukocytes                 | 1,06E-16 | CCL5, CD2, CD28, CD44, CD47, CD48, CD209, CXCL9, FYB, IL7, ITGAL, ITGAM, ITGAX, ITGB2, ITK, LCP1, RASSF5, SELL, SELPLG, TGFB2, THBS2, VAV1                                                                                                                                                                                                                  | 22 |
| Cell-To-Cell Signaling and Interaction | adhesion | adhesion of normal cells                           | 5,75E-16 | ADAM12, AMICA1, ANXA1, CCL5, CD2, CD28, CD44, CD47, CD48, CD209, CD8A, CXCL9, CXCL16, FCGR2A, FYB, GZMB, HCK, IL7, ITGAL, ITGAM, ITGAX, ITGB2, ITK, LCP1, LTB4R, PTPRC, RAC2, RASSF5, SELL, SELPLG, TGFB2, THBS2, VAV1                                                                                                                                      | 33 |
| Cell-To-Cell Signaling and Interaction | adhesion | adhesion of blood cells                            | 6,59E-16 | ANXA1, CCL5, CD2, CD28, CD44, CD47, CD48, CD209, CXCL9, FCGR2A, FYB, GZMB, HCK, IL7, ITGAL, ITGAM, ITGAX, ITGB2, ITK, LCP1, LTB4R, PTPRC, RAC2, RASSF5, SELL, SELPLG, TGFB2, THBS2, VAV1                                                                                                                                                                    | 29 |
| Cell-To-Cell Signaling and Interaction | adhesion | adhesion of eukaryotic cells                       | 2,78E-15 | ADAM12, AMICA1, ANXA1, CCL5, CD2, CD28, CD44, CD47, CD48, CD209, CD8A, CXCL9, CXCL16, CYTIP, ETS1, FCGR2A, FYB, GFI1, GZMB, HCK, IL7, ITGAL, ITGAM, ITGAX, ITGB2, ITK, LCP1, LTB4R, MARCKS, MYH9, PARVG, PTPRC, RAC2, RASSF5, SELL, SELPLG, TGFB2, THBS2, VAV1                                                                                              | 39 |
| Cell-To-Cell Signaling and Interaction | adhesion | adhesion of T lymphocytes                          | 1,51E-12 | CD2, CD44, CD47, CD48, CD209, CXCL9, FYB, IL7, ITGAL, ITGB2, ITK, RASSF5, SELL, SELPLG, THBS2                                                                                                                                                                                                                                                               | 15 |
| Cell-To-Cell Signaling and Interaction | adhesion | adhesion of lymphocytes                            | 5,56E-12 | CD2, CD28, CD44, CD47, CD48, CD209, CXCL9, FYB, IL7, ITGAL, ITGB2, ITK, RASSF5, SELL, SELPLG, THBS2                                                                                                                                                                                                                                                         | 16 |
| Cell-To-Cell Signaling and Interaction | adhesion | adhesion of neutrophils                            | 6,75E-09 | ANXA1, CD44, ITGAL, ITGAM, ITGAX, ITGB2, LCP1, SELL, SELPLG, VAV1                                                                                                                                                                                                                                                                                           | 10 |

|                                        |             |                                         |          |                                                                                                                                       |    |
|----------------------------------------|-------------|-----------------------------------------|----------|---------------------------------------------------------------------------------------------------------------------------------------|----|
| Cell-To-Cell Signaling and Interaction | adhesion    | adhesion of granulocytes                | 2,67E-08 | ANXA1, CD44, HCK, ITGAL, ITGAM, ITGAX, ITGB2, LCP1, SELL, SELPLG, VAV1                                                                | 11 |
| Cell-To-Cell Signaling and Interaction | adhesion    | adhesion of tumor cell lines            | 4,00E-07 | ADAM12, ANXA1, CD28, CD44, CD47, CYTIP, ETS1, GZMB, ITGAL, ITGAM, ITGAX, ITGB2, MARCKS, MYH9, PARVG, SELPLG                           | 16 |
| Cell-To-Cell Signaling and Interaction | adhesion    | adhesion of antigen presenting cells    | 4,14E-07 | CD2, CD44, CD48, CD209, ITGAL, ITGAM, ITGB2                                                                                           | 7  |
| Cell-To-Cell Signaling and Interaction | adhesion    | adhesion of endothelial cells           | 5,38E-07 | AMICA1, CCL5, CD44, ITGAL, ITGAM, ITGAX, ITGB2, SELL, SELPLG, TGFB2                                                                   | 10 |
| Cell-To-Cell Signaling and Interaction | adhesion    | adhesion of leukemia cells              | 2,01E-06 | AMICA1, CD44, ITGB2, SELL                                                                                                             | 4  |
| Cell-To-Cell Signaling and Interaction | adhesion    | adhesion of cell lines                  | 2,12E-06 | ADAM12, ANXA1, CD28, CD44, CD47, CYTIP, ETS1, GF11, GZMB, ITGAL, ITGAM, ITGAX, ITGB2, MARCKS, MYH9, PARVG, SELL, SELPLG               | 18 |
| Cell-To-Cell Signaling and Interaction | adhesion    | adhesion of monocytes                   | 5,07E-06 | CCL5, ITGAM, ITGAX, ITGB2, LCP1, TGFB2, VAV1                                                                                          | 7  |
| Cell-To-Cell Signaling and Interaction | adhesion    | adhesion of dendritic cells             | 7,05E-06 | CD44, CD209, ITGAL, ITGAM                                                                                                             | 4  |
| Cell-To-Cell Signaling and Interaction | adhesion    | adhesion of leukocyte cell lines        | 1,32E-05 | ANXA1, GF11, ITGAL, ITGAM, ITGB2, SELL                                                                                                | 6  |
| Cell-To-Cell Signaling and Interaction | interaction | interaction of T lymphocytes            | 8,46E-16 | CCL5, CCR5, CCR7, CD2, CD28, CD47, CD209, CXCL9, Fyb, IL7, ITGAL, ITGB2, ITK, KLRK1, LCK, LCP2, NRP1, SELPLG                          | 18 |
| Cell-To-Cell Signaling and Interaction | recruitment | recruitment of leukocytes               | 5,72E-13 | AHR, ANXA1, CCL5, CCR2, CCR5, CCR7, CD28, CD44, CD8A, CLU, CXCL9, CXCL16, ETS1, FCGR2B, ITGAM, ITGB2, LTB4R, LYZ, SELL, SELPLG, THBS2 | 21 |
| Cell-To-Cell Signaling and Interaction | recruitment | recruitment of phagocytes               | 2,30E-10 | AHR, ANXA1, CCL5, CCR2, CCR5, CD28, CD44, CD8A, CLU, ETS1, FCGR2B, ITGAM, ITGB2, LYZ, THBS2                                           | 15 |
| Cell-To-Cell Signaling and Interaction | recruitment | recruitment of antigen presenting cells | 2,35E-07 | ANXA1, CCL5, CCR2, CCR5, CD44, CD8A, ETS1, ITGB2, THBS2                                                                               | 9  |
| Cell-To-Cell Signaling and Interaction | recruitment | recruitment of T lymphocytes            | 5,16E-07 | CCL5, CCR2, CCR7, CD44, CD8A, CXCL9, CXCL16, ETS1                                                                                     | 8  |
| Cell-To-Cell Signaling and Interaction | recruitment | recruitment of lymphocytes              | 5,69E-07 | CCL5, CCR2, CCR7, CD44, CD8A, CXCL9, CXCL16, ETS1, SELL                                                                               | 9  |
| Cell-To-Cell Signaling and Interaction | recruitment | recruitment of macrophages              | 1,01E-06 | ANXA1, CCR2, CCR5, CD44, CD8A, ETS1, ITGB2, THBS2                                                                                     | 8  |
| Cell-To-Cell Signaling and Interaction | recruitment | recruitment                             | 1,24E-   | AHR, ANXA1, CCL5, CCR2, CD28, CD8A, CXCL9, FCGR2B, ITGAM, LTB4R, LYZ                                                                  | 11 |

|                                        |              |                                     |          |                                                                                                                            |    |
|----------------------------------------|--------------|-------------------------------------|----------|----------------------------------------------------------------------------------------------------------------------------|----|
| Signaling and Interaction              |              | of granulocytes                     | 06       |                                                                                                                            |    |
| Cell-To-Cell Signaling and Interaction | phagocytosis | phagocytosis of blood cells         | 7,54E-12 | ANXA1, CD44, CD47, CNN2, CSF2RB, DEF6, FCGR2A, FCGR2B, HCK, IRF8, ITGAM, ITGB2, RAC2, SELPLG                               | 14 |
| Cell-To-Cell Signaling and Interaction | phagocytosis | phagocytosis of eukaryotic cells    | 2,08E-11 | ANXA1, CD44, CD47, CNN2, CSF2RB, DEF6, FCGR2A, FCGR2B, HCK, IRF8, ITGAM, ITGB2, PRKCB, RAC2, SELPLG, VAV1                  | 16 |
| Cell-To-Cell Signaling and Interaction | phagocytosis | phagocytosis of cells               | 4,30E-11 | ANXA1, CD44, CD47, CNN2, CSF2RB, DEF6, FCGR2A, FCGR2B, HCK, IRF8, ITGAM, ITGAX, ITGB2, PRKCB, RAC2, SELPLG, VAV1           | 17 |
| Cell-To-Cell Signaling and Interaction | phagocytosis | phagocytosis of leukocytes          | 1,00E-10 | ANXA1, CD44, CD47, CNN2, CSF2RB, DEF6, FCGR2A, FCGR2B, IRF8, ITGAM, ITGB2, SELPLG                                          | 12 |
| Cell-To-Cell Signaling and Interaction | phagocytosis | phagocytosis of phagocytes          | 6,05E-10 | ANXA1, CD44, CD47, CNN2, CSF2RB, DEF6, FCGR2A, FCGR2B, ITGAM, ITGB2, SELPLG                                                | 11 |
| Cell-To-Cell Signaling and Interaction | phagocytosis | phagocytosis of myeloid cells       | 7,84E-09 | ANXA1, CD47, CSF2RB, FCGR2A, IRF8, ITGAM, ITGB2, SELPLG                                                                    | 8  |
| Cell-To-Cell Signaling and Interaction | phagocytosis | phagocytosis of granulocytes        | 1,47E-07 | ANXA1, CD47, CSF2RB, FCGR2A, ITGAM, ITGB2, SELPLG                                                                          | 7  |
| Cell-To-Cell Signaling and Interaction | phagocytosis | phagocytosis of tumor cell lines    | 3,25E-07 | ANXA1, CD44, DEF6, FCGR2A, FCGR2B, ITGAM, PRKCB                                                                            | 7  |
| Cell-To-Cell Signaling and Interaction | phagocytosis | phagocytosis of red blood cells     | 6,31E-07 | CD44, FCGR2A, HCK, ITGAM, ITGB2, RAC2                                                                                      | 6  |
| Cell-To-Cell Signaling and Interaction | phagocytosis | phagocytosis of cell lines          | 8,56E-07 | ANXA1, CD44, DEF6, FCGR2A, FCGR2B, ITGAM, PRKCB, VAV1                                                                      | 8  |
| Cell-To-Cell Signaling and Interaction | phagocytosis | phagocytosis of macrophages         | 1,23E-06 | ANXA1, CD44, CD47, CNN2, DEF6, FCGR2B, ITGB2                                                                               | 7  |
| Cell-To-Cell Signaling and Interaction | phagocytosis | phagocytosis of neutrophils         | 1,95E-06 | CD47, CSF2RB, FCGR2A, ITGAM, ITGB2, SELPLG                                                                                 | 6  |
| Cell-To-Cell Signaling and Interaction | phagocytosis | phagocytosis of leukemia cell lines | 2,43E-06 | ANXA1, DEF6, FCGR2A, FCGR2B, PRKCB                                                                                         | 5  |
| Cell-To-Cell Signaling and Interaction | response     | response of blood cells             | 1,82E-11 | CCL5, CCR2, CCR5, CD28, CLEC7A, CSF2RB, CXCL9, FCGR2B, GZMB, IL10RA, ITGAM, ITK, NFATC2, SELPLG, SH2B3, STAT4, TBX21       | 17 |
| Cell-To-Cell Signaling and Interaction | response     | response of leukocytes              | 1,28E-10 | CCL5, CCR2, CCR5, CD28, CLEC7A, CSF2RB, CXCL9, FCGR2B, GZMB, IL10RA, ITGAM, ITK, NFATC2, SELPLG, STAT4, TBX21              | 16 |
| Cell-To-Cell Signaling                 | response     | response of eukaryotic              | 4,36E-10 | CCL5, CCR2, CCR5, CD28, CLEC7A, CSF2RB, CXCL9, FCGR2B, GZMB, IL10RA, ITGAM, ITK, NFATC2, NOD2, SELPLG, SH2B3, STAT4, TBX21 | 18 |

|                                                        |                   |                                    |          |                                                                                                                                                                                                         |    |
|--------------------------------------------------------|-------------------|------------------------------------|----------|---------------------------------------------------------------------------------------------------------------------------------------------------------------------------------------------------------|----|
| and Interaction Cell-To-Cell Signaling and Interaction | response          | response of mononuclear leukocytes | 8,86E-09 | CCR2, CCR5, CD28, CLEC7A, CXCL9, FCGR2B, GZMB, IL10RA, ITK, NFATC2, SELPLG, STAT4, TBX21                                                                                                                | 13 |
| Interaction Cell-To-Cell Signaling and Interaction     | response          | response of cells                  | 1,21E-06 | CCL5, CCR2, CCR5, CD28, CLEC7A, CSF2RB, CXCL9, FAIM3, FCGR2B, GZMA, GZMB, IL7, IL10RA, ITGAM, ITK, NFATC2, NOD2, PRF1, SELPLG, SH2B3, STAT4, TBX21                                                      | 22 |
| Interaction Cell-To-Cell Signaling and Interaction     | response          | response of lymphocytes            | 3,18E-06 | CD28, CXCL9, FCGR2B, GZMB, IL10RA, ITK, NFATC2, SELPLG, STAT4, TBX21                                                                                                                                    | 10 |
| Interaction Cell-To-Cell Signaling and Interaction     | attachment        | attachment of leukocytes           | 5,65E-10 | CD209, CSF2RB, ITGAL, ITGAM, ITGAX, ITGB2, SELL, VAV1                                                                                                                                                   | 8  |
| Interaction Cell-To-Cell Signaling and Interaction     | attachment        | attachment of normal cells         | 6,05E-10 | CD209, CSF2RB, ITGAL, ITGAM, ITGAX, ITGB2, SELL, TFPI2, THBS2, TIMP2, VAV1                                                                                                                              | 11 |
| Interaction Cell-To-Cell Signaling and Interaction     | attachment        | attachment of eukaryotic cells     | 1,09E-09 | CD44, CD209, CSF2RB, ETS1, ITGAL, ITGAM, ITGAX, ITGB2, SELL, TFPI2, THBS2, TIMP2, VAV1                                                                                                                  | 13 |
| Interaction Cell-To-Cell Signaling and Interaction     | attachment        | attachment of lymphocytes          | 1,16E-05 | CD209, ITGB2, SELL, VAV1                                                                                                                                                                                | 4  |
| Interaction Cell-To-Cell Signaling and Interaction     | signaling         | signaling of leukocytes            | 1,41E-08 | CLEC7A, IL2RB, IL2RG, ITGAM, ITGB2, LCP2, SH2D1A                                                                                                                                                        | 7  |
| Interaction Cell-To-Cell Signaling and Interaction     | signaling         | signaling of T lymphocytes         | 1,64E-06 | IL2RB, IL2RG, ITGB2, LCP2, SH2D1A                                                                                                                                                                       | 5  |
| Interaction Cell-To-Cell Signaling and Interaction     | selection         | selection of T lymphocytes         | 4,22E-08 | CD28, CD74, CD3D, HLA-DOA, ITK, PTPRC, SIT1, VAV1                                                                                                                                                       | 8  |
| Interaction Cell-To-Cell Signaling and Interaction     | cell-cell contact | cell-cell contact of leukocytes    | 2,94E-07 | ITGAL, ITGAM, ITGAX, ITGB2                                                                                                                                                                              | 4  |
| Interaction Cell-To-Cell Signaling and Interaction     | stimulation       | stimulation of T lymphocytes       | 1,85E-06 | CD2, CD28, CD74, CD209, IL7, KLRK1, PTPRC, TNFSF13B                                                                                                                                                     | 8  |
| Interaction Cell-To-Cell Signaling and Interaction     | stimulation       | stimulation of cells               | 2,70E-06 | CCL5, CCND2, CD2, CD28, CD74, CD209, CD8A, IL7, IL2RB, KLRK1, PTPRC, RASGRP4, TNFSF13B                                                                                                                  | 13 |
| Interaction Cell-To-Cell Signaling and Interaction     | stimulation       | stimulation of eukaryotic cells    | 1,40E-05 | CCL5, CCND2, CD2, CD28, CD74, CD209, CD8A, IL7, IL2RB, KLRK1, PTPRC, TNFSF13B                                                                                                                           | 12 |
| Interaction Cell-To-Cell Signaling and Interaction     | detachment        | detachment of leukocytes           | 7,05E-06 | ANXA1, ITGAL, PTPRC, SELL                                                                                                                                                                               | 4  |
| Immune Cell Trafficking                                | activation        | activation of leukocytes           | 2,13E-26 | ANXA1, CCL5, CCR2, CD2, CD28, CD44, CD47, CD48, CD74, CD209, CD247, CD1C, CD300A, CD8A, CLEC7A, CSF1R, CXCL9, DEF6, FCGR2A, FCGR2B, FYB, GF11, GZMA, GZMB, HCK, HLA-C, HLA-DMB, HLA-DOA, HLA-DQB1, HLA- | 52 |

|                         |            |                                        |          |                                                                                                                                                                                                                                                                                                     |    |
|-------------------------|------------|----------------------------------------|----------|-----------------------------------------------------------------------------------------------------------------------------------------------------------------------------------------------------------------------------------------------------------------------------------------------------|----|
|                         |            |                                        |          | DRA, HLA-DRB1, IL7, IL2RB, ITGAL, ITGAM, ITGB2, ITGB6, ITK, JAK3, KLRK1, LCK, LCP2, NFATC2, PRF1, PTPRC, SELL, SIRPG, SIT1, STAT4, TBX21, TNFSF13B, VAV1                                                                                                                                            |    |
| Immune Cell Trafficking | activation | activation of lymphocytes              | 1,59E-19 | CCL5, CCR2, CD2, CD28, CD44, CD47, CD48, CD209, CD247, CD1C, CD8A, CLEC7A, DEF6, FCGR2A, FCGR2B, GFI1, GZMA, GZMB, HLA-DRA, HLA-DRB1, IL7, IL2RB, ITGAL, ITGB2, ITK, JAK3, KLRK1, LCK, NFATC2, PRF1, PTPRC, SIRPG, SIT1, STAT4, TBX21, TNFSF13B, VAV1                                               | 37 |
| Immune Cell Trafficking | activation | activation of T lymphocytes            | 7,00E-19 | CCL5, CCR2, CD2, CD28, CD44, CD47, CD48, CD209, CD247, CD8A, CLEC7A, DEF6, GFI1, GZMA, GZMB, HLA-DRA, HLA-DRB1, IL7, IL2RB, ITGAL, ITGB2, ITK, JAK3, LCK, NFATC2, PRF1, PTPRC, SIRPG, SIT1, STAT4, TBX21, VAV1                                                                                      | 32 |
| Immune Cell Trafficking | activation | activation of mast cells               | 4,95E-08 | CCL5, CCR2, CD48, CD300A, FCGR2A, FCGR2B, FYB, ITGAM, LCP2                                                                                                                                                                                                                                          | 9  |
| Immune Cell Trafficking | activation | activation of natural killer cells     | 4,75E-07 | CCL5, CD2, CD28, CD44, FCGR2A, IL2RB, ITGAL, ITGB2, KLRK1, PRF1, STAT4                                                                                                                                                                                                                              | 11 |
| Immune Cell Trafficking | activation | activation of antigen presenting cells | 5,10E-06 | CCL5, CD74, CD209, CSF1R, FCGR2A, HCK, HLA-C, HLA-DMB, HLA-DOA, HLA-DQB1, IL7, ITGB6, STAT4                                                                                                                                                                                                         | 13 |
| Immune Cell Trafficking | migration  | migration of leukocytes                | 5,07E-21 | ANXA1, CCL5, CCR2, CCR5, CCR7, CD2, CD28, CD44, CD47, CD48, CD209, CD247, CD8A, CNN2, CSF1R, CTSS, CXCL9, CXCL16, CYTIP, ETS1, ETV6, FCGR2A, FYB, HCK, IL7, IL10RA, ITGAL, ITGAM, ITGAX, ITGB2, ITK, LCK, LTB4R, MMP7, MYH9, PRF1, PRKCB, PTPRC, RAC2, RASSF5, SELL, SELPLG, THBS2, TIMP2, TNFSF13B | 45 |
| Immune Cell Trafficking | migration  | migration of mononuclear leukocytes    | 2,44E-19 | CCL5, CCR2, CCR5, CCR7, CD2, CD28, CD44, CD47, CD48, CD209, CD247, CD8A, CTSS, CXCL9, CXCL16, CYTIP, ETS1, ETV6, FYB, IL7, ITGAL, ITGAM, ITGAX, ITGB2, ITK, LCK, MYH9, PRF1, RASSF5, SELL, SELPLG, THBS2, TIMP2, TNFSF13B                                                                           | 34 |
| Immune Cell Trafficking | migration  | Lymphocyte migration                   | 1,34E-17 | CCL5, CCR2, CCR5, CCR7, CD2, CD28, CD44, CD47, CD48, CD209, CD247, CD8A, CXCL9, CXCL16, CYTIP, ETS1, ETV6, FYB, IL7, ITGAL, ITGB2, ITK, LCK, MYH9, PRF1, RASSF5, SELL, SELPLG, THBS2, TIMP2, TNFSF13B                                                                                               | 31 |
| Immune Cell Trafficking | migration  | T cell migration                       | 1,62E-09 | CCL5, CCR2, CCR5, CCR7, CD28, CD44, CXCL9, CXCL16, FYB, IL7, ITGB2, ITK, LCK, PRF1, SELL, SELPLG, THBS2, TIMP2                                                                                                                                                                                      | 18 |
| Immune Cell Trafficking | migration  | migration of phagocytes                | 4,15E-08 | ANXA1, CCL5, CD47, CNN2, CSF1R, HCK, ITGAL, ITGAM, ITGAX, ITGB2, MMP7, RAC2, SELL                                                                                                                                                                                                                   | 13 |
| Immune Cell Trafficking | migration  | migration of neutrophils               | 1,42E-07 | ANXA1, CCL5, CD47, CNN2, HCK, ITGAL, ITGAM, ITGAX, ITGB2, MMP7, SELL                                                                                                                                                                                                                                | 11 |
| Immune Cell Trafficking | migration  | migration of granulocytes              | 4,86E-07 | ANXA1, CCL5, CD47, CNN2, CXCL9, HCK, ITGAL, ITGAM, ITGAX, ITGB2, MMP7, SELL                                                                                                                                                                                                                         | 12 |
| Immune Cell Trafficking | migration  | migration of antigen presenting cells  | 1,49E-06 | CCL5, CCR2, CCR5, CCR7, CD44, CD209, CNN2, CSF1R, CXCL9, IL10RA, RAC2                                                                                                                                                                                                                               | 11 |
| Immune Cell Trafficking | migration  | migration of dendritic cells           | 6,65E-06 | CCL5, CCR2, CCR5, CCR7, CD44, CD209, CXCL9, IL10RA, RAC2                                                                                                                                                                                                                                            | 9  |
| Immune Cell Trafficking | migration  | migration of monocytes                 | 1,67E-05 | CCR2, CD47, CTSS, ITGAL, ITGAM, ITGAX, ITGB2, TIMP2                                                                                                                                                                                                                                                 | 8  |
| Immune Cell Trafficking | adhesion   | adhesion of leukocytes                 | 5,52E-17 | ANXA1, CCL5, CD2, CD28, CD44, CD47, CD48, CD209, CXCL9, FCGR2A, FYB, HCK, IL7, ITGAL, ITGAM, ITGAX, ITGB2, ITK, LCP1, LTB4R, PTPRC, RAC2, RASSF5, SELL, SELPLG, TGFB2, THBS2, VAV1                                                                                                                  | 28 |
| Immune Cell Trafficking | adhesion   | adhesion of mononuclear leukocytes     | 1,06E-16 | CCL5, CD2, CD28, CD44, CD47, CD48, CD209, CXCL9, FYB, IL7, ITGAL, ITGAM, ITGAX, ITGB2, ITK, LCP1, RASSF5, SELL, SELPLG, TGFB2, THBS2, VAV1                                                                                                                                                          | 22 |
| Immune Cell Trafficking | adhesion   | adhesion of T lymphocytes              | 1,51E-12 | CD2, CD44, CD47, CD48, CD209, CXCL9, FYB, IL7, ITGAL, ITGB2, ITK, RASSF5, SELL, SELPLG, THBS2                                                                                                                                                                                                       | 15 |
| Immune Cell Trafficking | adhesion   | adhesion of lymphocytes                | 5,56E-12 | CD2, CD28, CD44, CD47, CD48, CD209, CXCL9, FYB, IL7, ITGAL, ITGB2, ITK, RASSF5, SELL, SELPLG, THBS2                                                                                                                                                                                                 | 16 |

|                         |               |                                         |          |                                                                                                                                                                                                                                                |    |
|-------------------------|---------------|-----------------------------------------|----------|------------------------------------------------------------------------------------------------------------------------------------------------------------------------------------------------------------------------------------------------|----|
| Trafficking             |               |                                         |          |                                                                                                                                                                                                                                                |    |
| Immune Cell Trafficking | adhesion      | adhesion of neutrophils                 | 6,75E-09 | ANXA1, CD44, ITGAL, ITGAM, ITGAX, ITGB2, LCP1, SELL, SELPLG, VAV1                                                                                                                                                                              | 10 |
| Immune Cell Trafficking | adhesion      | adhesion of granulocytes                | 2,67E-08 | ANXA1, CD44, HCK, ITGAL, ITGAM, ITGAX, ITGB2, LCP1, SELL, SELPLG, VAV1                                                                                                                                                                         | 11 |
| Immune Cell Trafficking | adhesion      | adhesion of antigen presenting cells    | 4,14E-07 | CD2, CD44, CD48, CD209, ITGAL, ITGAM, ITGB2                                                                                                                                                                                                    | 7  |
| Immune Cell Trafficking | adhesion      | adhesion of monocytes                   | 5,07E-06 | CCL5, ITGAM, ITGAX, ITGB2, LCP1, TGFBR2, VAV1                                                                                                                                                                                                  | 7  |
| Immune Cell Trafficking | adhesion      | adhesion of dendritic cells             | 7,05E-06 | CD44, CD209, ITGAL, ITGAM                                                                                                                                                                                                                      | 4  |
| Immune Cell Trafficking | cell movement | cell movement of leukocytes             | 1,10E-13 | ANXA1, CASP1, CCL5, CCR2, CCR5, CCR7, CD2, CD28, CD44, CD47, CD48, CD209, CSF1R, CTSS, CXCL9, CXCL16, FCGR2A, FCGR2B, HCK, IL2RB, ITGAL, ITGAM, ITGAX, ITGB2, ITK, LTB4R, NFATC2, PRF1, PRKCB, PTPRC, RAC2, SELL, SELPLG, TGFBR2, THBS2, TIMP2 | 36 |
| Immune Cell Trafficking | cell movement | cell movement of myeloid cells          | 9,23E-12 | ANXA1, CASP1, CCL5, CCR2, CD2, CD28, CD44, CD47, CD48, CXCL9, FCGR2A, HCK, IL2RB, ITGAL, ITGAM, ITGAX, ITGB2, ITK, LTB4R, PTPRC, RAC2, SELL, SELPLG, TGFBR2                                                                                    | 24 |
| Immune Cell Trafficking | cell movement | cell movement of granulocytes           | 5,64E-11 | ANXA1, CASP1, CCL5, CCR2, CD2, CD28, CD44, CD47, CD48, CXCL9, FCGR2A, HCK, IL2RB, ITGAL, ITGAM, ITGAX, ITGB2, ITK, LTB4R, RAC2, SELL, SELPLG, TGFBR2                                                                                           | 23 |
| Immune Cell Trafficking | cell movement | cell movement of mononuclear leukocytes | 1,34E-10 | ANXA1, CCL5, CCR2, CCR5, CCR7, CD28, CD44, CD47, CTSS, CXCL9, CXCL16, ITGAL, ITGAX, ITGB2, ITK, NFATC2, PRF1, PRKCB, RAC2, SELL, SELPLG, THBS2, TIMP2                                                                                          | 23 |
| Immune Cell Trafficking | cell movement | cell movement of phagocytes             | 4,29E-09 | ANXA1, CASP1, CCL5, CCR2, CCR5, CD28, CD44, CD47, CSF1R, CXCL9, FCGR2A, HCK, ITGAL, ITGAM, ITGAX, ITGB2, LTB4R, RAC2, SELL, SELPLG, TGFBR2                                                                                                     | 21 |
| Immune Cell Trafficking | cell movement | cell movement of neutrophils            | 5,75E-09 | ANXA1, CASP1, CCL5, CCR2, CD28, CD44, CD47, FCGR2A, HCK, ITGAL, ITGAM, ITGAX, ITGB2, LTB4R, RAC2, SELL, SELPLG, TGFBR2                                                                                                                         | 18 |
| Immune Cell Trafficking | cell movement | cell movement of T lymphocytes          | 1,12E-07 | CCL5, CCR2, CCR5, CCR7, CD28, CD44, CXCL9, CXCL16, ITGB2, ITK, PRF1, SELL, SELPLG, THBS2                                                                                                                                                       | 14 |
| Immune Cell Trafficking | cell movement | cell movement of lymphocytes            | 5,42E-07 | CCL5, CCR2, CCR5, CCR7, CD28, CD44, CXCL9, CXCL16, ITGB2, ITK, NFATC2, PRF1, RAC2, SELL, SELPLG, THBS2                                                                                                                                         | 16 |
| Immune Cell Trafficking | cell movement | cell movement of eosinophils            | 9,47E-07 | CCL5, CD2, CD47, CD48, CXCL9, IL2RB, ITGAL, ITGAM, ITGB2, ITK                                                                                                                                                                                  | 10 |
| Immune Cell Trafficking | cell movement | cell movement of monocytes              | 2,11E-06 | ANXA1, CCL5, CCR2, CD47, CTSS, CXCL9, ITGAL, ITGAX, ITGB2, PRKCB, TIMP2                                                                                                                                                                        | 11 |
| Immune Cell Trafficking | cell movement | cell movement of memory T lymphocytes   | 6,67E-06 | CCL5, CCR7, CD28, CXCL9, ITGB2                                                                                                                                                                                                                 | 5  |
| Immune Cell Trafficking | cell movement | cell movement of bone                   | 7,72E-06 | ANXA1, CD44, CD47, CXCL9, ITGAL, ITGAM, ITGAX, ITGB2                                                                                                                                                                                           | 8  |

|                         |                |                                          |          |                                                                                                                                       |    |
|-------------------------|----------------|------------------------------------------|----------|---------------------------------------------------------------------------------------------------------------------------------------|----|
|                         |                | marrow cells                             |          |                                                                                                                                       |    |
| Immune Cell Trafficking | recruitment    | recruitment of leukocytes                | 5,72E-13 | AHR, ANXA1, CCL5, CCR2, CCR5, CCR7, CD28, CD44, CD8A, CLU, CXCL9, CXCL16, ETS1, FCGR2B, ITGAM, ITGB2, LTB4R, LYZ, SELL, SELPLG, THBS2 | 21 |
| Immune Cell Trafficking | recruitment    | recruitment of phagocytes                | 2,30E-10 | AHR, ANXA1, CCL5, CCR2, CCR5, CD28, CD44, CD8A, CLU, ETS1, FCGR2B, ITGAM, ITGB2, LYZ, THBS2                                           | 15 |
| Immune Cell Trafficking | recruitment    | recruitment of antigen presenting cells  | 2,35E-07 | ANXA1, CCL5, CCR2, CCR5, CD44, CD8A, ETS1, ITGB2, THBS2                                                                               | 9  |
| Immune Cell Trafficking | recruitment    | recruitment of T lymphocytes             | 5,16E-07 | CCL5, CCR2, CCR7, CD44, CD8A, CXCL9, CXCL16, ETS1                                                                                     | 8  |
| Immune Cell Trafficking | recruitment    | recruitment of lymphocytes               | 5,69E-07 | CCL5, CCR2, CCR7, CD44, CD8A, CXCL9, CXCL16, ETS1, SELL                                                                               | 9  |
| Immune Cell Trafficking | recruitment    | recruitment of macrophages               | 1,01E-06 | ANXA1, CCR2, CCR5, CD44, CD8A, ETS1, ITGB2, THBS2                                                                                     | 8  |
| Immune Cell Trafficking | recruitment    | recruitment of granulocytes              | 1,24E-06 | AHR, ANXA1, CCL5, CCR2, CD28, CD8A, CXCL9, FCGR2B, ITGAM, LTB4R, LYZ                                                                  | 11 |
| Immune Cell Trafficking | accumulation   | accumulation of leukocytes               | 7,14E-12 | CCL5, CCR2, CCR5, CCR7, CD28, CXCL9, CYBB, DEF6, GF11, IL7, IL10RA, IL2RG, ITGAL, ITGAM, ITGAX, ITGB2, NFATC2, SELL, SELPLG, TIMP2    | 20 |
| Immune Cell Trafficking | accumulation   | accumulation of mononuclear leukocytes   | 3,74E-10 | CCL5, CCR5, CCR7, CD28, DEF6, GF11, IL7, IL10RA, IL2RG, ITGAL, ITGB2, NFATC2, SELL                                                    | 13 |
| Immune Cell Trafficking | accumulation   | accumulation of lymphocytes              | 1,36E-09 | CCL5, CCR5, CCR7, CD28, DEF6, IL7, IL10RA, IL2RG, ITGAL, ITGB2, NFATC2, SELL                                                          | 12 |
| Immune Cell Trafficking | accumulation   | accumulation of T lymphocytes            | 1,45E-07 | CCL5, CCR5, CCR7, CD28, DEF6, IL10RA, IL2RG, ITGAL, NFATC2                                                                            | 9  |
| Immune Cell Trafficking | transmigration | transmigration of leukocytes             | 1,62E-10 | ANXA1, CCL5, CCR7, CD28, CD44, CD47, CD209, CTSS, CXCL9, ITGAL, ITGAM, ITGAX, ITGB2, TIMP2                                            | 14 |
| Immune Cell Trafficking | transmigration | transmigration of mononuclear leukocytes | 2,95E-09 | CCL5, CCR7, CD28, CD44, CD47, CTSS, ITGAL, ITGAX, ITGB2, TIMP2                                                                        | 10 |
| Immune Cell Trafficking | transmigration | transmigration of eosinophils            | 2,43E-06 | CD47, CXCL9, ITGAL, ITGAM, ITGB2                                                                                                      | 5  |
| Immune Cell Trafficking | transmigration | transmigration of granulocytes           | 3,66E-06 | ANXA1, CD47, CXCL9, ITGAL, ITGAM, ITGAX, ITGB2                                                                                        | 7  |
| Immune Cell Trafficking | transmigration | transmigration of neutrophils            | 9,11E-06 | ANXA1, CD47, ITGAL, ITGAM, ITGAX, ITGB2                                                                                               | 6  |
| Immune Cell Trafficking | transmigration | transmigration of monocytes              | 1,32E-05 | CD47, CTSS, ITGAL, ITGAX, ITGB2, TIMP2                                                                                                | 6  |
| Immune Cell Trafficking | emigration     | emigration of leukocytes                 | 1,03E-09 | ANXA1, CCR2, CCR7, CD44, CNN2, CYTIP, FCGR2A, ITGB2, SELL                                                                             | 9  |
| Immune Cell Trafficking | cell rolling   | cell rolling of leukocytes               | 8,21E-09 | ANXA1, CCR2, CCR7, CD44, FCGR2A, ITGAM, ITGB2, RAC2, SELL, SELPLG                                                                     | 10 |
| Immune Cell Trafficking | cell rolling   | cell rolling of granulocytes             | 1,52E-05 | ANXA1, ITGB2, RAC2, SELL, SELPLG                                                                                                      | 5  |

|                         |                        |                                         |          |                                                                                                                                                                                                                                                                                                                                                                                                                                                                                                                                                                                                                                                                                                                                                                                                                                                                                             |     |
|-------------------------|------------------------|-----------------------------------------|----------|---------------------------------------------------------------------------------------------------------------------------------------------------------------------------------------------------------------------------------------------------------------------------------------------------------------------------------------------------------------------------------------------------------------------------------------------------------------------------------------------------------------------------------------------------------------------------------------------------------------------------------------------------------------------------------------------------------------------------------------------------------------------------------------------------------------------------------------------------------------------------------------------|-----|
| Immune Cell Trafficking | cell rolling           | cell rolling of mononuclear leukocytes  | 1,52E-05 | CCR2, CCR7, ITGB2, SELL, SELPLG                                                                                                                                                                                                                                                                                                                                                                                                                                                                                                                                                                                                                                                                                                                                                                                                                                                             | 5   |
| Immune Cell Trafficking | homing                 | homing of leukocytes                    | 1,40E-07 | ANXA1, CCL5, CCR2, CCR5, CCR7, CD28, CXCL9, CXCL16, FCGR2A, HCK, ITGAL, ITGAM, ITGB2, LTB4R, PRKCB, PTPRC, RAC2, SELPLG, THBS2                                                                                                                                                                                                                                                                                                                                                                                                                                                                                                                                                                                                                                                                                                                                                              | 19  |
| Immune Cell Trafficking | chemotaxis             | chemotaxis of leukocytes                | 3,58E-07 | ANXA1, CCL5, CCR2, CCR5, CCR7, CD28, CXCL9, CXCL16, FCGR2A, HCK, ITGAL, ITGAM, ITGB2, LTB4R, PRKCB, PTPRC, RAC2, THBS2                                                                                                                                                                                                                                                                                                                                                                                                                                                                                                                                                                                                                                                                                                                                                                      | 18  |
| Immune Cell Trafficking | chemotaxis             | chemotaxis of myeloid cells             | 9,94E-06 | ANXA1, CCL5, CD28, CXCL9, FCGR2A, HCK, ITGAM, ITGB2, LTB4R, PTPRC, RAC2                                                                                                                                                                                                                                                                                                                                                                                                                                                                                                                                                                                                                                                                                                                                                                                                                     | 11  |
| Immune Cell Trafficking | infiltration           | infiltration by neutrophils             | 1,14E-06 | ANXA1, CASP1, CCR2, CD44, ITGAL, ITGAM, ITGB2, LTB4R, RAC2, SELL, TGFB2                                                                                                                                                                                                                                                                                                                                                                                                                                                                                                                                                                                                                                                                                                                                                                                                                     | 11  |
| Immune Cell Trafficking | egression              | egression of leukocytes                 | 1,64E-06 | CCR2, CCR5, CCR7, ITGAM, ITGB2                                                                                                                                                                                                                                                                                                                                                                                                                                                                                                                                                                                                                                                                                                                                                                                                                                                              | 5   |
| Immune Cell Trafficking | trafficking            | trafficking of phagocytes               | 3,84E-06 | CCL5, CCR5, ITGB2                                                                                                                                                                                                                                                                                                                                                                                                                                                                                                                                                                                                                                                                                                                                                                                                                                                                           | 3   |
| Immune Cell Trafficking | trafficking            | trafficking of leukocytes               | 6,13E-06 | ANXA1, CCL5, CCR2, CCR5, CD44, ITGB2                                                                                                                                                                                                                                                                                                                                                                                                                                                                                                                                                                                                                                                                                                                                                                                                                                                        | 6   |
| Immune Cell Trafficking | trafficking            | trafficking of antigen presenting cells | 1,52E-05 | CCL5, CCR2, CCR5                                                                                                                                                                                                                                                                                                                                                                                                                                                                                                                                                                                                                                                                                                                                                                                                                                                                            | 3   |
| Immune Cell Trafficking | detachment             | detachment of leukocytes                | 7,05E-06 | ANXA1, ITGAL, PTPRC, SELL                                                                                                                                                                                                                                                                                                                                                                                                                                                                                                                                                                                                                                                                                                                                                                                                                                                                   | 4   |
| Immunological Disease   | immunological disorder | immunological disorder                  | 4,86E-26 | ADAM12, ADRA2A, AHR, AMICA1, ANAPC4, ANTXR1, ANXA1, AOA, ARHGDIB, ATM, BICD1, CASP1, CCL5, CCR2, CCR5, CD2, CD28, CD44, CD47, CD52, CD53, CD74, CD247, CD3D, CD8A, CDC7, CELF2, CHODL, CIITA, CLU, CSF1R, CSF2RB, CTSS, CXCL9, CXCL16, CYBB, DEF6, EBF1, ETS1, ETV6, FCGR2A, FCGR2B, FLI1, FMNL2 (includes EG:114793), FUBP1, GABRP, GAS7, GBP2, GFRA1, GZMA, GZMB, HCK, HCLS1, HLA-B, HLA-C, HLA-DMB, HLA-DOA, HLA-DPA1, HLA-DPB1, HLA-DQB1, HLA-DRA, HLA-DRB1, HLA-DRB4, HLA-F, IKZF1, IL7, IL10RA, IL2RB, IL2RG, IL7R, IRF1, IRF4, IRF8, ITGAL, ITGAM, ITGB2, ITGB6, ITK, JAK3, KLRB1, LCK, LCP1, LCP2, LHFP, LYZ, MRC1, MS4A7, MYB (includes EG:4602), MYH9, NCF4, NFATC2, NFKB1, NOD2, NOTCH2, P2RY13, PID1, PRF1, PRKCB, PTPN22, PTPRC, RAC2, RASGRP4, RNF213, ROBO1, RUNX1, SELL, SH2B3, SH2D1A, SIPA1L2, SIRPG, STAT4, TAP1, TBX21, TCF4, TGFB2, THEMIS, TNFSF13B, TSHZ2, VAV1, VIM | 120 |
| Immunological Disease   | immunological disorder | immunological disorder of mammalia      | 5,87E-22 | AHR, AOA, CASP1, CCL5, CCR2, CCR5, CD28, CD44, CD47, CIITA, CXCL9, CYBB, DEF6, ETS1, FCGR2A, FCGR2B, HLA-B, HLA-C, HLA-DQB1, HLA-DRA, HLA-DRB1, IL7, IL2RG, IL7R, IRF1, IRF4, IRF8, ITGAL, ITGB2, JAK3, LCP2, NFATC2, PRF1, RUNX1, SELL, SH2B3, SH2D1A, STAT4, TAP1, TBX21, VAV1                                                                                                                                                                                                                                                                                                                                                                                                                                                                                                                                                                                                            | 41  |
| Immunological Disease   | immunological disorder | immunological disorder of mice          | 1,50E-21 | AHR, AOA, CASP1, CCL5, CCR2, CCR5, CD28, CD44, CD47, CIITA, CYBB, DEF6, ETS1, FCGR2A, FCGR2B, HLA-B, HLA-C, HLA-DQB1, HLA-DRA, IL7, IL2RG, IL7R, IRF1, IRF4, IRF8, ITGAL, ITGB2, JAK3, LCP2, NFATC2, PRF1, RUNX1, SELL, SH2B3, SH2D1A, STAT4, TAP1, TBX21, VAV1                                                                                                                                                                                                                                                                                                                                                                                                                                                                                                                                                                                                                             | 39  |
| Immunological Disease   | autoimmune disease     | autoimmune disease                      | 5,46E-18 | ADAM12, ADRA2A, AMICA1, ANAPC4, ANTXR1, ANXA1, ARHGDIB, ATM, BICD1, CASP1, CCL5, CCR2, CCR5, CD2, CD28, CD44, CD47, CD53, CD74, CD3D, CDC7, CELF2, CHODL, CIITA, CLU, CSF2RB, CXCL9, CXCL16, DEF6, EBF1, ETS1, FCGR2A, FCGR2B, FLI1, FMNL2 (includes EG:114793), FUBP1, GABRP, GAS7, GBP2, GZMA, GZMB, HCK, HCLS1, HLA-B, HLA-C, HLA-DMB, HLA-DOA, HLA-DPA1, HLA-DPB1, HLA-DQB1, HLA-DRA, HLA-DRB1, HLA-DRB4, HLA-F, IKZF1, IL7, IL10RA, IL2RB, IL7R, IRF1, IRF4, ITGAL, ITGAM, ITGB2, JAK3, KLRB1, LCP1, LHFP, LYZ, MRC1, MS4A7, MYH9, NCF4, NFATC2, NOD2, NOTCH2, P2RY13, PID1, PRKCB, PTPN22, PTPRC, RNF213, ROBO1, RUNX1, SELL, SH2B3, SH2D1A, SIRPG, STAT4, TAP1, TBX21, TCF4, TGFB2, THEMIS, TNFSF13B, TSHZ2, VIM                                                                                                                                                                     | 97  |
| Immunological Disease   | autoimmune disease     | autoimmune disease of                   | 2,79E-15 | CASP1, CCL5, CCR2, CCR5, CD28, CD44, CD47, CIITA, DEF6, FCGR2A, FCGR2B, HLA-B, HLA-C, HLA-DQB1, HLA-DRA, IL7, IL7R, IRF4, ITGAL, JAK3,                                                                                                                                                                                                                                                                                                                                                                                                                                                                                                                                                                                                                                                                                                                                                      | 26  |



|                       |                                                      |                                                      |          |                                                                                                                                                                                                                                                                                                                                                                                                                                                                                                                                            |    |
|-----------------------|------------------------------------------------------|------------------------------------------------------|----------|--------------------------------------------------------------------------------------------------------------------------------------------------------------------------------------------------------------------------------------------------------------------------------------------------------------------------------------------------------------------------------------------------------------------------------------------------------------------------------------------------------------------------------------------|----|
|                       |                                                      | mice                                                 |          | RUNX1, SELL, SH2D1A, STAT4, TAP1, TBX21                                                                                                                                                                                                                                                                                                                                                                                                                                                                                                    |    |
| Immunological Disease | autoimmune disease                                   | autoimmune disease of mammalia                       | 5,47E-15 | CASP1, CCL5, CCR2, CCR5, CD28, CD44, CD47, CIITA, DEF6, FCGR2A, FCGR2B, HLA-B, HLA-C, HLA-DQB1, HLA-DRA, HLA-DRB1, IL7, IL7R, IRF4, ITGAL, JAK3, RUNX1, SELL, SH2D1A, STAT4, TAP1, TBX21                                                                                                                                                                                                                                                                                                                                                   | 27 |
| Immunological Disease | rheumatoid arthritis                                 | rheumatoid arthritis                                 | 1,24E-14 | ANAPC4, ANTXR1, ANXA1, ARHGDIB, ATM, BICD1, CCL5, CCR2, CCR5, CD28, CD44, CD53, CD74, CD3D, CDC7, CELF2, CIITA, CLU, CSF2RB, CXCL9, CXCL16, DEF6, EBF1, FCGR2A, FCGR2B, FLI1, FMNL2 (includes EG:114793), FUBP1, GABRP, GAS7, GBP2, GZMA, GZMB, HCK, HCLS1, HLA-C, HLA-DMB, HLA-DOA, HLA-DPA1, HLA-DPB1, HLA-DQB1, HLA-DRA, HLA-DRB1, HLA-DRB4, IKZF1, IL7, IL10RA, IL2RB, IL7R, ITGAL, ITGB2, LCP1, LHFP, LYZ, MRC1, MS4A7, MYH9, NCF4, NFATC2, NOD2, P2RY13, PID1, PTPN22, PTPRC, RNF213, ROBO1, RUNX1, STAT4, TAP1, TCF4, TNFSF13B, VIM | 72 |
| Immunological Disease | systemic lupus erythematosus                         | systemic lupus erythematosus                         | 2,02E-10 | CD44, CLU, CXCL16, FCGR2A, FCGR2B, HLA-DRA, IL7R, ITGAM, PTPN22, PTPRC, SH2B3, SH2D1A, STAT4, TAP1, TNFSF13B                                                                                                                                                                                                                                                                                                                                                                                                                               | 15 |
| Immunological Disease | immunodeficiency                                     | immunodeficiency                                     | 1,65E-09 | CD28, CD247, CD3D, CIITA, IL2RG, IL7R, ITGB2, JAK3, PTPRC, RAC2, TAP1                                                                                                                                                                                                                                                                                                                                                                                                                                                                      | 11 |
| Immunological Disease | graft-vs-host disease                                | graft-vs-host disease                                | 2,72E-08 | CCR5, CD2, CD52, CD247, CD3D, CSF2RB, IL2RB, IL2RG, PRF1                                                                                                                                                                                                                                                                                                                                                                                                                                                                                   | 9  |
| Immunological Disease | severe combined immunodeficiency                     | severe combined immunodeficiency                     | 2,24E-07 | CD247, CD3D, IL2RG, IL7R, JAK3, PTPRC                                                                                                                                                                                                                                                                                                                                                                                                                                                                                                      | 6  |
| Immunological Disease | lymphocytic leukemia                                 | lymphocytic leukemia                                 | 3,73E-07 | ATM, CD52, CD74, CD247, CD3D, CSF2RB, ETV6, IKZF1, IL2RB, IL2RG, IRF4, ITGB2, LCK, PRKCB, RUNX1                                                                                                                                                                                                                                                                                                                                                                                                                                            | 15 |
| Immunological Disease | infection                                            | infection of leukocytes                              | 1,81E-06 | CASP1, CCL5, CCR2, CCR5, CD209, IRF1, ITGAM                                                                                                                                                                                                                                                                                                                                                                                                                                                                                                | 7  |
| Immunological Disease | eosinophilia                                         | eosinophilia                                         | 3,76E-06 | CD247, CTSS, CXCL9, DEF6, IL2RG, IRF8, ITGB6, ITK, LCK, MYH9, PRF1                                                                                                                                                                                                                                                                                                                                                                                                                                                                         | 11 |
| Immunological Disease | autosomal recessive severe combined immunodeficiency | autosomal recessive severe combined immunodeficiency | 3,84E-06 | CD3D, IL7R, JAK3                                                                                                                                                                                                                                                                                                                                                                                                                                                                                                                           | 3  |
| Immunological Disease | insulin-dependent diabetes mellitus                  | insulin-dependent diabetes mellitus                  | 4,40E-06 | ADAM12, ADRA2A, AMICA1, ANAPC4, CCR2, CD2, CD44, CD53, CDC7, CHODL, CIITA, FLI1, HLA-B, HLA-C, HLA-DOA, HLA-DPA1, HLA-DQB1, HLA-DRA, HLA-F, IL2RB, IL7R, ITGAL, KLRB1, LHFP, MYH9, NFATC2, NOD2, NOTCH2, PRKCB, PTPN22, RNF213, ROBO1, RUNX1, SH2B3, SIRPG, STAT4, TAP1, TGFBR2, TNFSF13B, TSHZ2                                                                                                                                                                                                                                           | 40 |
| Immunological Disease | hypersensitive reaction                              | hypersensitive reaction                              | 5,35E-06 | ADRA2A, CCL5, CD2, CD44, CD74, FCGR2A, FCGR2B, HLA-DRA, HLA-DRB1, ITGAL, ITGB2, LCP2, NFKBIZ, VAV1                                                                                                                                                                                                                                                                                                                                                                                                                                         | 14 |
| Immunological Disease | autoimmune hemolytic anemia                          | autoimmune hemolytic anemia of mice                  | 7,05E-06 | CD28, CD47, FCGR2A, IL7R                                                                                                                                                                                                                                                                                                                                                                                                                                                                                                                   | 4  |
| Cell Death            | cytotoxicity                                         | cytotoxicity of cells                                | 5,99E-25 | CASP1, CCL5, CD2, CD28, CD44, CD48, CD74, CD96, CD300A, CYBB, FCGR2A, GZMA, GZMB, HCK, HLA-B, HLA-C, HLA-DRB1, IL7, ITGAL, ITGAM, ITGB2, ITK, KLRK1, LCK, NFATC2, PRF1, PTPRC, SH2D1A, SLAMF7, STAT4, TAP1, TBX21, VAV1, WIPF1                                                                                                                                                                                                                                                                                                             | 34 |
| Cell Death            | cytotoxicity                                         | cytotoxicity of leukocytes                           | 4,50E-23 | CASP1, CCL5, CD2, CD44, CD48, CD96, CD300A, CYBB, FCGR2A, GZMA, GZMB, HCK, HLA-C, HLA-DRB1, IL7, ITGAL, ITGAM, ITGB2, ITK, KLRK1, LCK, NFATC2, PRF1, PTPRC, STAT4, TBX21, VAV1, WIPF1                                                                                                                                                                                                                                                                                                                                                      | 28 |
| Cell Death            | cytotoxicity                                         | cytotoxicity of normal cells                         | 5,14E-23 | CASP1, CCL5, CD2, CD44, CD48, CD74, CD96, CD300A, CYBB, FCGR2A, GZMA, GZMB, HCK, HLA-C, HLA-DRB1, IL7, ITGAL, ITGAM, ITGB2, ITK, KLRK1, LCK, NFATC2, PRF1, PTPRC, STAT4, TBX21, VAV1, WIPF1                                                                                                                                                                                                                                                                                                                                                | 29 |
| Cell Death            | cytotoxicity                                         | cytotoxicity of eukaryotic cells                     | 3,37E-22 | CASP1, CCL5, CD2, CD28, CD44, CD48, CD74, CD96, CD300A, CYBB, FCGR2A, GZMA, GZMB, HCK, HLA-B, HLA-C, HLA-DRB1, IL7, ITGAL, ITGAM, ITGB2, ITK, KLRK1, LCK, NFATC2, PRF1, PTPRC, STAT4, TBX21, VAV1, WIPF1                                                                                                                                                                                                                                                                                                                                   | 30 |
| Cell Death            | cytotoxicity                                         | cytotoxicity of lymphocytes                          | 4,84E-19 | CCL5, CD2, CD44, CD48, CD96, CD300A, FCGR2A, GZMA, GZMB, HLA-C, HLA-DRB1, IL7, ITGAL, ITGB2, ITK, KLRK1, LCK, NFATC2, PRF1, PTPRC, STAT4, TBX21, VAV1, WIPF1                                                                                                                                                                                                                                                                                                                                                                               | 24 |

|            |              |                                      |          |                                                                                                                                                                                                                                                                                                                                                                                                                                                                                                                                                                                                                                                                                                                               |     |
|------------|--------------|--------------------------------------|----------|-------------------------------------------------------------------------------------------------------------------------------------------------------------------------------------------------------------------------------------------------------------------------------------------------------------------------------------------------------------------------------------------------------------------------------------------------------------------------------------------------------------------------------------------------------------------------------------------------------------------------------------------------------------------------------------------------------------------------------|-----|
| Cell Death | cytotoxicity | cytotoxicity of natural killer cells | 4,42E-13 | CD2, CD44, CD48, CD96, CD300A, FCGR2A, ITGAL, ITGB2, ITK, KLRK1, LCK, PRF1, STAT4, TBX21, VAV1, WIPF1                                                                                                                                                                                                                                                                                                                                                                                                                                                                                                                                                                                                                         | 16  |
| Cell Death | cytotoxicity | cytotoxicity of T lymphocytes        | 1,99E-09 | CCL5, GZMA, GZMB, HLA-C, HLA-DRB1, IL7, KLRK1, NFATC2, PRF1, PTPRC, STAT4                                                                                                                                                                                                                                                                                                                                                                                                                                                                                                                                                                                                                                                     | 11  |
| Cell Death | cytotoxicity | cytotoxicity of cytotoxic T cells    | 6,13E-06 | CCL5, GZMA, GZMB, HLA-C, PRF1, PTPRC                                                                                                                                                                                                                                                                                                                                                                                                                                                                                                                                                                                                                                                                                          | 6   |
| Cell Death | cell death   | cell death of leukocytes             | 5,76E-20 | ANXA1, ATM, BCL2A1, CASP1, CCL5, CCR5, CD2, CD28, CD44, CD47, CD247, CIITA, DEF6, EOMES, FCGR2B, GFI1, GZMA, GZMB, HLA-DRB4, IL7, IL2RG, IL7R, IRF1, IRF8, ITGAL, ITGAM, ITGB2, ITK, JAK3, LCK, MAP4K1, NFATC2, PRF1, PRKCB, PTPRC, RAC2, TBX21, TGFBR2, THBS2, TNFSF13B                                                                                                                                                                                                                                                                                                                                                                                                                                                      | 40  |
| Cell Death | cell death   | cell death of blood cells            | 8,39E-20 | ANXA1, ATM, BCL2A1, CASP1, CCL5, CCR5, CD2, CD28, CD44, CD47, CD247, CIITA, DEF6, EOMES, FCGR2B, FLI1, GFI1, GZMA, GZMB, HLA-DRB4, IL7, IL2RG, IL7R, IRF1, IRF8, ITGAL, ITGAM, ITGB2, ITK, JAK3, LCK, MAP4K1, NFATC2, PRF1, PRKCB, PTPRC, RAC2, TBX21, TGFBR2, THBS2, TNFSF13B                                                                                                                                                                                                                                                                                                                                                                                                                                                | 41  |
| Cell Death | cell death   | cell death of lymphocytes            | 9,27E-20 | ATM, BCL2A1, CASP1, CCL5, CCR5, CD2, CD28, CD44, CD47, CD247, CIITA, DEF6, EOMES, FCGR2B, GFI1, GZMA, GZMB, HLA-DRB4, IL7, IL2RG, IL7R, ITGAL, ITK, JAK3, LCK, MAP4K1, NFATC2, PRF1, PRKCB, PTPRC, RAC2, TBX21, TGFBR2, THBS2, TNFSF13B                                                                                                                                                                                                                                                                                                                                                                                                                                                                                       | 35  |
| Cell Death | cell death   | cell death                           | 5,71E-18 | ADAM12, AGAP2, AHR, AKAP12, ANTXR1, ANTXR2, ANXA1, APOL1, ATM, BCL11B, BCL2A1, CASP1, CCL5, CCND2, CCR2, CCR5, CD2, CD28, CD44, CD47, CD48, CD53, CD74, CD247, CD8A, CDC7, CIITA, CLU, CNN2, CSF1R, CSF2RB, CTSS, CYBB, DEF6, EBF1, EMILIN2, EOMES, ETS1, ETV6, FAIM3, FCGR2B, FLI1, FLNA, FUBP1, GABRP, GFI1, GFRA1, GLIPR1, GPR65, GZMA, GZMB, GZMK, HCK, HCLS1, HLA-B, HLA-DRB4, IL7, IL2RG, IL7R, IRF1, IRF4, IRF8, ITGAL, ITGAM, ITGB2, ITGB6, ITK, JAK3, LCK, LEF1, LYZ, MAP4K1, MMP7, MYB (includes EG:4602), NFATC2, NFKBIZ, NLRP3, NOD2, NOTCH2, NRP1, PRF1, PRKCB, PTPN22, PTPRC, PTPRE, RAC2, RASSF2, RASSF5, RUNX1, RUNX2, SERPINB9, SLC2A3, STAT4, TBX21, TCF4, TGFBR2, THBS2, TIMP2, TNFSF13B, TPM1, UACA, VAV1 | 102 |
| Cell Death | cell death   | cell death of T lymphocytes          | 5,27E-17 | ATM, BCL2A1, CASP1, CCL5, CCR5, CD2, CD28, CD44, CD47, CD247, CIITA, DEF6, EOMES, GFI1, GZMA, GZMB, IL7, IL2RG, IL7R, ITK, JAK3, LCK, MAP4K1, PRF1, PTPRC, RAC2, TBX21, TGFBR2, THBS2                                                                                                                                                                                                                                                                                                                                                                                                                                                                                                                                         | 29  |
| Cell Death | cell death   | cell death of normal cells           | 5,31E-16 | ADAM12, AGAP2, AHR, ANXA1, APOL1, ATM, BCL2A1, CASP1, CCL5, CCR2, CCR5, CD2, CD28, CD44, CD47, CD247, CDC7, CIITA, CLU, CSF1R, CTSS, CYBB, DEF6, EOMES, ETS1, ETV6, FCGR2B, FLI1, FLNA, GFI1, GFRA1, GZMA, GZMB, HLA-B, HLA-DRB4, IL7, IL2RG, IL7R, IRF1, IRF8, ITGAL, ITGAM, ITGB2, ITK, JAK3, LCK, MAP4K1, MMP7, NFATC2, NLRP3, NRP1, PRF1, PRKCB, PTPRC, RAC2, RASSF5, RUNX1, RUNX2, TBX21, TCF4, TGFBR2, THBS2, TIMP2, TNFSF13B                                                                                                                                                                                                                                                                                           | 64  |
| Cell Death | cell death   | cell death of eukaryotic cells       | 1,16E-15 | ADAM12, AGAP2, AHR, ANTXR1, ANTXR2, ANXA1, APOL1, ATM, BCL2A1, CASP1, CCL5, CCND2, CCR2, CCR5, CD2, CD28, CD44, CD47, CD48, CD247, CD8A, CDC7, CIITA, CLU, CNN2, CSF1R, CSF2RB, CTSS, CYBB, DEF6, EMILIN2, EOMES, ETS1, ETV6, FCGR2B, FLI1, FLNA, FUBP1, GFI1, GFRA1, GLIPR1, GPR65, GZMA, GZMB, GZMK, HCK, HCLS1, HLA-B, HLA-DRB4, IL7, IL2RG, IL7R, IRF1, IRF4, IRF8, ITGAL, ITGAM, ITGB2, ITK, JAK3, LCK, LEF1, MAP4K1, MMP7, MYB (includes EG:4602), NFATC2, NFKBIZ, NLRP3, NRP1, PRF1, PRKCB, PTPN22, PTPRC, PTPRE, RAC2, RASSF5, RUNX1, RUNX2, SERPINB9, TBX21, TCF4, TGFBR2, THBS2, TIMP2, TNFSF13B, TPM1, VAV1                                                                                                        | 87  |
| Cell Death | cell death   | cell death of tumor cell lines       | 4,73E-11 | AGAP2, AHR, APOL1, ATM, BCL2A1, CASP1, CD28, CD44, CD47, CD48, CDC7, CLU, CNN2, CSF1R, CSF2RB, EMILIN2, ETS1, FCGR2B, FLI1, FUBP1, GFI1, GLIPR1, GPR65, GZMB, GZMK, HCK, HCLS1, HLA-DRB4, IL7, IL2RG, IRF1, IRF4, IRF8, ITGAM, JAK3, LCK, LEF1, MAP4K1, MMP7, MYB (includes EG:4602), NFKBIZ, NLRP3, NRP1, PRF1, PRKCB, PTPN22, PTPRC, PTPRE, RASSF5, RUNX1, TNFSF13B, VAV1                                                                                                                                                                                                                                                                                                                                                   | 52  |
| Cell Death | cell death   | cell death of leukemia cell lines    | 6,48E-11 | BCL2A1, CD28, CD47, CSF2RB, EMILIN2, GFI1, GZMB, GZMK, HCLS1, HLA-DRB4, IL7, IL2RG, ITGAM, LCK, NLRP3, PRF1, PRKCB, PTPRC, PTPRE, RASSF5, RUNX1, VAV1                                                                                                                                                                                                                                                                                                                                                                                                                                                                                                                                                                         | 22  |
| Cell Death | cell death   | cell death of cell lines             | 1,33E-10 | AGAP2, AHR, ANTXR1, ANTXR2, APOL1, ATM, BCL2A1, CASP1, CCL5, CCND2, CCR5, CD2, CD28, CD44, CD47, CD48, CD8A, CDC7, CLU, CNN2, CSF1R, CSF2RB, EMILIN2, ETS1, ETV6, FCGR2B, FLI1, FUBP1, GFI1, GLIPR1, GPR65, GZMB, GZMK, HCK, HCLS1, HLA-DRB4, IL7, IL2RG, IRF1, IRF4, IRF8, ITGAM, JAK3, LCK, LEF1, MAP4K1, MMP7, MYB (includes EG:4602),                                                                                                                                                                                                                                                                                                                                                                                     | 61  |

|            |            |                                    |          |                                                                                                                                                                                                                                                                                                                                                                                                                                                                                                                                                                                                                           |    |
|------------|------------|------------------------------------|----------|---------------------------------------------------------------------------------------------------------------------------------------------------------------------------------------------------------------------------------------------------------------------------------------------------------------------------------------------------------------------------------------------------------------------------------------------------------------------------------------------------------------------------------------------------------------------------------------------------------------------------|----|
|            |            |                                    |          | NFKBIZ, NLRP3, NRP1, PRF1, PRKCB, PTPN22, PTPRC, PTPRE, RASSF5, RUNX1, TCF4, TNFSF13B, VAV1                                                                                                                                                                                                                                                                                                                                                                                                                                                                                                                               |    |
| Cell Death | cell death | cell death of lymphoma cell lines  | 8,47E-09 | BCL2A1, CD48, CNN2, FCGR2B, FUBP1, GPR65, HLA-DRB4, IRF8, JAK3, LEF1, MAP4K1, PRKCB, PTPN22, PTPRC, RUNX1, TNFSF13B                                                                                                                                                                                                                                                                                                                                                                                                                                                                                                       | 16 |
| Cell Death | cell death | cell death of leukocyte cell lines | 5,47E-08 | BCL2A1, CCL5, CCND2, CCR5, CD2, CD44, CD8A, ETV6, GFI1, GZMB, HCLS1, HLA-DRB4, IL7, IRF4, MYB (includes EG:4602), PTPRC, RUNX1                                                                                                                                                                                                                                                                                                                                                                                                                                                                                            | 17 |
| Cell Death | cell death | cell death of B lymphocytes        | 2,25E-07 | BCL2A1, CASP1, CD47, FCGR2B, GZMB, HLA-DRB4, IL7, PRF1, PRKCB, PTPRC, TNFSF13B                                                                                                                                                                                                                                                                                                                                                                                                                                                                                                                                            | 11 |
| Cell Death | cell death | cell death of tumor cells          | 3,77E-07 | ADAM12, AGAP2, ATM, CASP1, CD47, CLU, GZMB, IL7, IRF1, LEF1, NRP1, SERPINB9, TGFBR2, THBS2, TIMP2, TNFSF13B, TPM1                                                                                                                                                                                                                                                                                                                                                                                                                                                                                                         | 17 |
| Cell Death | cell death | cell death of thymocytes           | 7,66E-06 | ATM, BCL2A1, CASP1, CD28, CD44, GFI1, GZMA, GZMB, IL7, PTPRC                                                                                                                                                                                                                                                                                                                                                                                                                                                                                                                                                              | 10 |
| Cell Death | apoptosis  | apoptosis of leukocytes            | 1,42E-16 | ANXA1, ATM, BCL2A1, CASP1, CCL5, CCR5, CD2, CD28, CD44, CD47, CD247, CIITA, FCGR2B, GFI1, GZMA, GZMB, IL7, IL2RG, IL7R, IRF1, IRF8, ITGAM, ITGB2, ITK, JAK3, LCK, MAP4K1, NFATC2, PRF1, PRKCB, PTPRC, RAC2, THBS2, TNFSF13B                                                                                                                                                                                                                                                                                                                                                                                               | 34 |
| Cell Death | apoptosis  | apoptosis of blood cells           | 1,55E-16 | ANXA1, ATM, BCL2A1, CASP1, CCL5, CCR5, CD2, CD28, CD44, CD47, CD247, CIITA, FCGR2B, FLI1, GFI1, GZMA, GZMB, IL7, IL2RG, IL7R, IRF1, IRF8, ITGAM, ITGB2, ITK, JAK3, LCK, MAP4K1, NFATC2, PRF1, PRKCB, PTPRC, RAC2, THBS2, TNFSF13B                                                                                                                                                                                                                                                                                                                                                                                         | 35 |
| Cell Death | apoptosis  | apoptosis of lymphocytes           | 4,48E-16 | ATM, BCL2A1, CASP1, CCL5, CCR5, CD2, CD28, CD44, CD47, CD247, CIITA, FCGR2B, GFI1, GZMA, GZMB, IL7, IL2RG, IL7R, ITK, JAK3, LCK, MAP4K1, NFATC2, PRF1, PRKCB, PTPRC, RAC2, THBS2, TNFSF13B                                                                                                                                                                                                                                                                                                                                                                                                                                | 29 |
| Cell Death | apoptosis  | apoptosis                          | 9,51E-16 | ADAM12, AGAP2, AHR, AKAP12, ANXA1, ATM, BCL11B, BCL2A1, CASP1, CCL5, CCND2, CCR2, CCR5, CD2, CD28, CD44, CD47, CD48, CD53, CD74, CD247, CD8A, CDC7, CIITA, CLU, CNN2, CSF1R, CSF2RB, CTSS, EBF1, EMILIN2, ETS1, ETV6, FAIM3, FCGR2B, FLI1, FUBP1, GFI1, GFRA1, GLIPR1, GPR65, GZMA, GZMB, HCK, HCLS1, HLA-B, IL7, IL2RG, IL7R, IRF1, IRF4, IRF8, ITGAM, ITGB2, ITGB6, ITK, JAK3, LCK, LEF1, MAP4K1, MMP7, MYB (includes EG:4602), NFATC2, NFKBIZ, NLRP3, NOD2, NOTCH2, NRP1, PRF1, PRKCB, PTPN22, PTPRC, PTPRE, RAC2, RASSF2, RASSF5, RUNX1, RUNX2, SLC2A3, STAT4, TCF4, TGFBR2, THBS2, TIMP2, TNFSF13B, TPM1, UACA, VAV1 | 88 |
| Cell Death | apoptosis  | apoptosis of T lymphocytes         | 7,02E-15 | ATM, BCL2A1, CASP1, CCL5, CCR5, CD2, CD28, CD44, CD47, CD247, CIITA, GFI1, GZMA, GZMB, IL7, IL2RG, IL7R, ITK, JAK3, LCK, MAP4K1, PRF1, PTPRC, RAC2, THBS2                                                                                                                                                                                                                                                                                                                                                                                                                                                                 | 25 |
| Cell Death | apoptosis  | apoptosis of eukaryotic cells      | 3,33E-14 | ADAM12, AGAP2, AHR, ANXA1, ATM, BCL2A1, CASP1, CCL5, CCND2, CCR2, CCR5, CD2, CD28, CD44, CD47, CD48, CD247, CD8A, CDC7, CIITA, CLU, CNN2, CSF1R, CSF2RB, CTSS, EMILIN2, ETS1, ETV6, FCGR2B, FLI1, FUBP1, GFI1, GFRA1, GLIPR1, GPR65, GZMA, GZMB, HCK, HCLS1, HLA-B, IL7, IL2RG, IL7R, IRF1, IRF4, IRF8, ITGAM, ITGB2, ITK, JAK3, LCK, LEF1, MAP4K1, MMP7, MYB (includes EG:4602), NFATC2, NFKBIZ, NLRP3, NRP1, PRF1, PRKCB, PTPN22, PTPRC, PTPRE, RAC2, RASSF5, RUNX1, RUNX2, TCF4, TGFBR2, THBS2, TIMP2, TNFSF13B, TPM1, VAV1                                                                                            | 75 |
| Cell Death | apoptosis  | apoptosis of normal cells          | 5,97E-13 | ADAM12, AGAP2, AHR, ANXA1, ATM, BCL2A1, CASP1, CCL5, CCR2, CCR5, CD2, CD28, CD44, CD47, CD247, CIITA, CLU, CSF1R, CTSS, ETS1, ETV6, FCGR2B, FLI1, GFI1, GFRA1, GZMA, GZMB, HLA-B, IL7, IL2RG, IL7R, IRF1, IRF8, ITGAM, ITGB2, ITK, JAK3, LCK, MAP4K1, MMP7, NFATC2, NLRP3, NRP1, PRF1, PRKCB, PTPRC, RAC2, RUNX2, TCF4, THBS2, TIMP2, TNFSF13B                                                                                                                                                                                                                                                                            | 52 |
| Cell Death | apoptosis  | apoptosis of tumor cell lines      | 4,61E-11 | AGAP2, AHR, ATM, BCL2A1, CASP1, CD28, CD44, CD47, CD48, CDC7, CLU, CNN2, CSF1R, CSF2RB, EMILIN2, ETS1, FCGR2B, FLI1, FUBP1, GFI1, GLIPR1, GPR65, GZMB, HCK, HCLS1, IL7, IL2RG, IRF1, IRF4, IRF8, ITGAM, JAK3, LCK, MAP4K1, MMP7, MYB (includes EG:4602), NFKBIZ, NLRP3, NRP1, PRF1, PRKCB, PTPN22, PTPRC, PTPRE, RASSF5, RUNX1, TNFSF13B, VAV1                                                                                                                                                                                                                                                                            | 47 |
| Cell Death | apoptosis  | apoptosis of cell lines            | 5,59E-11 | AGAP2, AHR, ATM, BCL2A1, CASP1, CCL5, CCND2, CCR5, CD2, CD28, CD44, CD47, CD48, CD8A, CDC7, CLU, CNN2, CSF1R, CSF2RB, EMILIN2, ETS1, ETV6, FCGR2B, FLI1, FUBP1, GFI1, GLIPR1, GPR65, GZMB, HCK, HCLS1, IL7, IL2RG, IRF1, IRF4, IRF8, ITGAM, JAK3, LCK, LEF1, MAP4K1, MMP7, MYB (includes EG:4602), NFKBIZ, NRP1, PRF1, PRKCB, PTPN22, PTPRC, PTPRE, RASSF5, RUNX1, TCF4, TNFSF13B, VAV1                                                                                                                                                                                                                                   | 55 |
| Cell Death | apoptosis  | apoptosis of leukemia              | 1,20E-08 | BCL2A1, CD28, CD47, CSF2RB, GFI1, GZMB, HCLS1, IL7, IL2RG, ITGAM, LCK, PRF1, PRKCB, PTPRC, PTPRE, RASSF5, RUNX1, VAV1                                                                                                                                                                                                                                                                                                                                                                                                                                                                                                     | 18 |

|            |                               |                                   | cell lines |                                                                                                                                                                                                                                                                                           |    |
|------------|-------------------------------|-----------------------------------|------------|-------------------------------------------------------------------------------------------------------------------------------------------------------------------------------------------------------------------------------------------------------------------------------------------|----|
| Cell Death | apoptosis                     | apoptosis of lymphoma cell lines  | 7,33E-08   | BCL2A1, CD48, CNN2, FCGR2B, FUBP1, GPR65, IRF8, JAK3, MAP4K1, PRKCB, PTPN22, PTPRC, RUNX1, TNFSF13B                                                                                                                                                                                       | 14 |
| Cell Death | apoptosis                     | apoptosis of B lymphocytes        | 7,59E-07   | BCL2A1, CASP1, CD47, FCGR2B, GZMB, IL7, PRF1, PRKCB, PTPRC, TNFSF13B                                                                                                                                                                                                                      | 10 |
| Cell Death | apoptosis                     | apoptosis of leukocyte cell lines | 7,61E-07   | BCL2A1, CCL5, CCND2, CCR5, CD2, CD44, CD8A, ETV6, GZMB, HCLS1, IL7, IRF4, MYB (includes EG:4602), PTPRC, RUNX1                                                                                                                                                                            | 15 |
| Cell Death | apoptosis                     | apoptosis of tumor cells          | 8,71E-06   | ADAM12, AGAP2, ATM, CASP1, CLU, GZMB, IL7, IRF1, NRP1, TGFB2, THBS2, TIMP2, TNFSF13B, TPM1                                                                                                                                                                                                | 14 |
| Cell Death | survival                      | survival of leukocytes            | 8,90E-13   | BCL2A1, CD28, CD44, CD300A, CD8A, CLU, CSF1R, CSF2RB, HCK, IL7, IL2RB, IL2RG, ITGB2, JAK3, LEF1, MYB (includes EG:4602), PRKCB, PTPRC, RAC2, STAT4, TNFSF13B                                                                                                                              | 21 |
| Cell Death | survival                      | survival of blood cells           | 1,01E-12   | BCL2A1, CD28, CD44, CD300A, CD8A, CLU, CSF1R, CSF2RB, HCK, IL7, IL2RB, IL2RG, ITGB2, JAK3, LEF1, MYB (includes EG:4602), PRKCB, PTPRC, RAC2, RUNX1, STAT4, TNFSF13B                                                                                                                       | 22 |
| Cell Death | survival                      | survival of lymphocytes           | 1,73E-09   | CD28, CD44, CD8A, CLU, HCK, IL7, IL2RB, IL2RG, JAK3, LEF1, MYB (includes EG:4602), PRKCB, PTPRC, STAT4, TNFSF13B                                                                                                                                                                          | 15 |
| Cell Death | survival                      | survival of cells                 | 2,12E-08   | ANTXR1, ANTXR2, ATM, BCL2A1, CCL5, CD28, CD44, CD48, CD74, CD300A, CD8A, CLU, CSF1R, CSF2RB, CXCL9, DGKA, EMILIN2, ETV6, FLI1, GFRA1, GZMB, HCK, IL7, IL2RB, IL2RG, ITGB2, JAK3, LCK, LEF1, LYZ, MYB (includes EG:4602), PRKCB, PTPN22, PTPRC, RAC2, RUNX1, STAT4, TGFB2, TIMP2, TNFSF13B | 40 |
| Cell Death | survival                      | survival of normal cells          | 3,79E-08   | ATM, BCL2A1, CCL5, CD28, CD44, CD300A, CD8A, CLU, CSF1R, CSF2RB, CXCL9, GFRA1, HCK, IL7, IL2RB, IL2RG, ITGB2, JAK3, LEF1, MYB (includes EG:4602), PRKCB, PTPRC, RAC2, RUNX1, STAT4, TNFSF13B                                                                                              | 26 |
| Cell Death | survival                      | survival of eukaryotic cells      | 4,57E-08   | ANTXR1, ANTXR2, ATM, BCL2A1, CCL5, CD28, CD44, CD74, CD300A, CD8A, CLU, CSF1R, CSF2RB, CXCL9, DGKA, EMILIN2, ETV6, FLI1, GFRA1, HCK, IL7, IL2RB, IL2RG, ITGB2, JAK3, LCK, LEF1, MYB (includes EG:4602), PRKCB, PTPN22, PTPRC, RAC2, RUNX1, STAT4, TGFB2, TIMP2, TNFSF13B                  | 37 |
| Cell Death | survival                      | survival of B lymphocytes         | 3,22E-06   | CD44, CLU, HCK, IL7, LEF1, MYB (includes EG:4602), PRKCB, TNFSF13B                                                                                                                                                                                                                        | 8  |
| Cell Death | survival                      | survival of T lymphocytes         | 3,57E-06   | CD28, CD8A, IL7, IL2RB, IL2RG, JAK3, MYB (includes EG:4602), PTPRC, STAT4                                                                                                                                                                                                                 | 9  |
| Cell Death | cytolysis                     | cytolysis                         | 1,27E-09   | APOL1, CD44, CD48, CD247, FCGR2A, GZMA, GZMB, HLA-C, ITGB2, KLRK1, LCK, PRF1, PTPRC, VAV1                                                                                                                                                                                                 | 14 |
| Cell Death | cytolysis                     | cytolysis of cells                | 3,48E-09   | CD44, CD48, FCGR2A, GZMA, GZMB, HLA-C, ITGB2, KLRK1, LCK, PRF1, PTPRC, VAV1                                                                                                                                                                                                               | 12 |
| Cell Death | cytolysis                     | cytolysis of eukaryotic cells     | 1,72E-08   | CD48, FCGR2A, GZMB, HLA-C, ITGB2, KLRK1, LCK, PRF1, PTPRC, VAV1                                                                                                                                                                                                                           | 10 |
| Cell Death | cytolysis                     | cytolysis of lymphocytes          | 2,01E-06   | HLA-C, LCK, PRF1, PTPRC                                                                                                                                                                                                                                                                   | 4  |
| Cell Death | lysis                         | lysis of cells                    | 1,23E-08   | CASP1, CD44, CD48, CD8A, FCGR2A, GZMA, GZMB, HLA-C, ITGB2, KLRK1, LCK, PRF1, PTPRC, VAV1                                                                                                                                                                                                  | 14 |
| Cell Death | lysis                         | lysis of lymphocytes              | 1,07E-06   | CD48, HLA-C, LCK, PRF1, PTPRC                                                                                                                                                                                                                                                             | 5  |
| Cell Death | killing                       | killing of cells                  | 9,12E-08   | ANTXR1, CD47, CD48, CIITA, CYBB, ETS1, GZMB, HLA-C, KLRK1, LYZ, PRF1, SH2D1A, SLAMF7                                                                                                                                                                                                      | 13 |
| Cell Death | killing                       | killing of lymphocytes            | 2,02E-07   | CD47, CD48, CIITA, HLA-C, KLRK1, PRF1, SH2D1A, SLAMF7                                                                                                                                                                                                                                     | 8  |
| Cell Death | killing                       | killing of eukaryotic cells       | 2,25E-07   | ANTXR1, CD47, CD48, CIITA, CYBB, ETS1, HLA-C, KLRK1, PRF1, SH2D1A, SLAMF7                                                                                                                                                                                                                 | 11 |
| Cell Death | killing                       | killing of normal cells           | 6,53E-07   | CD47, CD48, CIITA, ETS1, HLA-C, KLRK1, PRF1, SH2D1A, SLAMF7                                                                                                                                                                                                                               | 9  |
| Cell Death | killing                       | killing of natural killer cells   | 1,52E-05   | CD48, HLA-C, PRF1, SH2D1A, SLAMF7                                                                                                                                                                                                                                                         | 5  |
| Cell Death | activation-induced cell death | activation-induced cell death     | 2,35E-07   | CCR5, CD28, CIITA, GFI1, IRF4, ITK, MAP4K1, PRF1, RAC2                                                                                                                                                                                                                                    | 9  |

|                      |                               |                                                   |          |                                                                                                                                                                                                                                                                                                                                                                                                                                                                                                                                                                                                                                                                                                                                                                                                                                                                             |     |
|----------------------|-------------------------------|---------------------------------------------------|----------|-----------------------------------------------------------------------------------------------------------------------------------------------------------------------------------------------------------------------------------------------------------------------------------------------------------------------------------------------------------------------------------------------------------------------------------------------------------------------------------------------------------------------------------------------------------------------------------------------------------------------------------------------------------------------------------------------------------------------------------------------------------------------------------------------------------------------------------------------------------------------------|-----|
| Cell Death           | activation-induced cell death | activation-induced cell death of T lymphocytes    | 3,25E-07 | CCR5, CD28, CIITA, ITK, MAP4K1, PRF1, RAC2                                                                                                                                                                                                                                                                                                                                                                                                                                                                                                                                                                                                                                                                                                                                                                                                                                  | 7   |
| Cell Death           | activation-induced cell death | activation-induced cell death of eukaryotic cells | 6,14E-07 | CCR5, CD28, CIITA, GF11, ITK, MAP4K1, PRF1, RAC2                                                                                                                                                                                                                                                                                                                                                                                                                                                                                                                                                                                                                                                                                                                                                                                                                            | 8   |
| Inflammatory Disease | inflammatory disorder         | inflammatory disorder of mammalia                 | 1,02E-22 | ANXA1, AOA, CASP1, CCL5, CCR2, CCR5, CD2, CD28, CD44, CIITA, CLU, CTSS, CYBB, DEF6, FCGR2A, FCGR2B, GF11, GZMB, HCK, HLA-B, HLA-DQB1, HLA-DRA, HLA-DRB1, IL7, IL2RB, IRF4, ITGAL, ITGAM, ITGB2, ITGB6, ITK, JAK3, LTB4R, MMP7, NFATC2, NOD2, PRF1, PTPRC, SELL, SH2B3, SH2D1A, STAT4, TAP1, TBX21, TGFB2, TNFSF13B, VAV1                                                                                                                                                                                                                                                                                                                                                                                                                                                                                                                                                    | 47  |
| Inflammatory Disease | inflammatory disorder         | inflammatory disorder of mice                     | 2,60E-22 | ANXA1, AOA, CASP1, CCL5, CCR2, CCR5, CD2, CD28, CD44, CIITA, CLU, CTSS, CYBB, DEF6, FCGR2A, FCGR2B, GF11, GZMB, HCK, HLA-B, HLA-DQB1, HLA-DRA, IL7, IL2RB, IRF4, ITGAL, ITGAM, ITGB2, ITGB6, ITK, JAK3, LTB4R, MMP7, NFATC2, PRF1, PTPRC, SELL, SH2B3, SH2D1A, STAT4, TAP1, TBX21, TGFB2, TNFSF13B, VAV1                                                                                                                                                                                                                                                                                                                                                                                                                                                                                                                                                                    | 45  |
| Inflammatory Disease | inflammatory disorder         | inflammatory disorder                             | 4,07E-20 | ADAM12, ADRA2A, AHR, ANAPC4, ANTXR1, ANXA1, AOA, ARHGDIB, ATM, BCL2A1, BICD1, CASP1, CCL5, CCR2, CCR5, CCR7, CD2, CD28, CD44, CD48, CD52, CD53, CD74, CD247, CD3D, CD8A, CDC7, CELF2, CIITA, CLEC7A, CLU, CSF2RB, CTSS, CXCL9, CXCL16, CYBB, DEF6, EBF1, ETV6, FCGR2A, FCGR2B, FLI1, FMNL2 (includes EG:114793), FUBP1, GABRP, GAS7, GBP2, GF11, GFRA1, GZMA, GZMB, HCK, HCLS1, HLA-B, HLA-C, HLA-DMB, HLA-DOA, HLA-DPA1, HLA-DPB1, HLA-DQB1, HLA-DRA, HLA-DRB1, HLA-DRB4, HLA-F, IKZF1, IL7, IL10RA, IL2RB, IL2RG, IL7R, IRF4, ITGAL, ITGAM, ITGB2, ITGB6, ITK, JAK3, KLRB1, LCK, LCP1, LCP2, LHFP, LTB4R, LYZ, MAP4K1, MMP7, MRC1, MS4A7, MYH9, NCF4, NFATC2, NFKBIZ, NLRP3, NOD2, NOTCH2, P2RY13, PID1, PRF1, PRKCB, PTPN22, PTPRC, RASGRP4, RNF213, ROBO1, RUNX1, SELL, SH2B3, SH2D1A, STAT4, TAP1, TBX21, TCF4, TFPI2, TGFB2, THBS2, TIMP2, TNFSF13B, VAV1, VIM, WDR33 | 120 |
| Inflammatory Disease | rheumatic disease             | rheumatic disease                                 | 4,48E-18 | ADRA2A, ANAPC4, ANTXR1, ANXA1, ARHGDIB, ATM, BICD1, CASP1, CCL5, CCR2, CCR5, CD28, CD44, CD53, CD74, CD3D, CDC7, CELF2, CIITA, CLU, CSF2RB, CTSS, CXCL9, CXCL16, DEF6, EBF1, FCGR2A, FCGR2B, FLI1, FMNL2 (includes EG:114793), FUBP1, GABRP, GAS7, GBP2, GZMA, GZMB, HCK, HCLS1, HLA-B, HLA-C, HLA-DMB, HLA-DOA, HLA-DPA1, HLA-DPB1, HLA-DQB1, HLA-DRA, HLA-DRB1, HLA-DRB4, IKZF1, IL7, IL10RA, IL2RB, IL7R, ITGAL, ITGAM, ITGB2, LCK, LCP1, LHFP, LYZ, MAP4K1, MRC1, MS4A7, MYH9, NCF4, NFATC2, NLRP3, NOD2, P2RY13, PID1, PRKCB, PTPN22, PTPRC, RNF213, ROBO1, RUNX1, SH2B3, SH2D1A, STAT4, TAP1, TBX21, TCF4, TFPI2, THBS2, TNFSF13B, VIM                                                                                                                                                                                                                                | 86  |
| Inflammatory Disease | rheumatic disease             | rheumatic disease of mammalia                     | 4,36E-10 | ANXA1, CASP1, CCL5, CCR2, CD44, CIITA, CTSS, DEF6, FCGR2A, FCGR2B, HLA-DRB1, IL7, IL2RB, SH2D1A, STAT4, TAP1, TBX21, TNFSF13B                                                                                                                                                                                                                                                                                                                                                                                                                                                                                                                                                                                                                                                                                                                                               | 18  |
| Inflammatory Disease | rheumatic disease             | rheumatic disease of rodents                      | 1,62E-09 | ANXA1, CASP1, CCL5, CCR2, CD44, CIITA, CTSS, DEF6, FCGR2A, FCGR2B, IL7, IL2RB, SH2D1A, STAT4, TAP1, TBX21, TNFSF13B                                                                                                                                                                                                                                                                                                                                                                                                                                                                                                                                                                                                                                                                                                                                                         | 17  |
| Inflammatory Disease | rheumatic disease             | rheumatic disease of mice                         | 4,15E-09 | ANXA1, CASP1, CCR2, CD44, CIITA, CTSS, DEF6, FCGR2A, FCGR2B, IL7, IL2RB, SH2D1A, STAT4, TAP1, TBX21, TNFSF13B                                                                                                                                                                                                                                                                                                                                                                                                                                                                                                                                                                                                                                                                                                                                                               | 16  |
| Inflammatory Disease | arthritis                     | arthritis                                         | 7,13E-17 | ADRA2A, ANAPC4, ANTXR1, ANXA1, ARHGDIB, ATM, BICD1, CASP1, CCL5, CCR2, CCR5, CD28, CD44, CD53, CD74, CD3D, CDC7, CELF2, CIITA, CLU, CSF2RB, CTSS, CXCL9, CXCL16, DEF6, EBF1, FCGR2A, FCGR2B, FLI1, FMNL2 (includes EG:114793), FUBP1, GABRP, GAS7, GBP2, GZMA, GZMB, HCK, HCLS1, HLA-B, HLA-C, HLA-DMB, HLA-DOA, HLA-DPA1, HLA-DPB1, HLA-DQB1, HLA-DRA, HLA-DRB1, HLA-DRB4, IKZF1, IL7, IL10RA, IL2RB, IL7R, ITGAL, ITGB2, LCP1, LHFP, LYZ, MAP4K1, MRC1, MS4A7, MYH9, NCF4, NFATC2, NLRP3, NOD2, P2RY13, PID1, PRKCB, PTPN22, PTPRC, RNF213, ROBO1, RUNX1, STAT4, TAP1, TBX21, TCF4, TFPI2, THBS2, TNFSF13B, VIM                                                                                                                                                                                                                                                           | 82  |
| Inflammatory Disease | arthritis                     | arthritis of mammalia                             | 7,12E-09 | ANXA1, CASP1, CCL5, CCR2, CD44, CIITA, CTSS, DEF6, FCGR2A, FCGR2B, HLA-DRB1, IL7, IL2RB, STAT4, TBX21, TNFSF13B                                                                                                                                                                                                                                                                                                                                                                                                                                                                                                                                                                                                                                                                                                                                                             | 16  |
| Inflammatory Disease | arthritis                     | arthritis of rodents                              | 3,36E-08 | ANXA1, CASP1, CCL5, CCR2, CD44, CIITA, CTSS, DEF6, FCGR2A, FCGR2B, IL7, IL2RB, STAT4, TBX21, TNFSF13B                                                                                                                                                                                                                                                                                                                                                                                                                                                                                                                                                                                                                                                                                                                                                                       | 15  |
| Inflammatory Disease | arthritis                     | arthritis of                                      | 8,71E-   | ANXA1, CASP1, CCR2, CD44, CIITA, CTSS, DEF6, FCGR2A, FCGR2B, IL7,                                                                                                                                                                                                                                                                                                                                                                                                                                                                                                                                                                                                                                                                                                                                                                                                           | 14  |

|                      |                                  |                                          |          |                                                                                                                                                                                                                                                                                                                                                                                                                                                                                                                                            |    |
|----------------------|----------------------------------|------------------------------------------|----------|--------------------------------------------------------------------------------------------------------------------------------------------------------------------------------------------------------------------------------------------------------------------------------------------------------------------------------------------------------------------------------------------------------------------------------------------------------------------------------------------------------------------------------------------|----|
| ry Disease           |                                  | mice                                     | 08       | IL2RB, STAT4, TBX21, TNFSF13B                                                                                                                                                                                                                                                                                                                                                                                                                                                                                                              |    |
| Inflammatory Disease | rheumatoid arthritis             | rheumatoid arthritis                     | 1,24E-14 | ANAPC4, ANTXR1, ANXA1, ARHGDIB, ATM, BICD1, CCL5, CCR2, CCR5, CD28, CD44, CD53, CD74, CD3D, CDC7, CELF2, CIITA, CLU, CSF2RB, CXCL9, CXCL16, DEF6, EBF1, FCGR2A, FCGR2B, FLI1, FMNL2 (includes EG:114793), FUBP1, GABRP, GAS7, GBP2, GZMA, GZMB, HCK, HCLS1, HLA-C, HLA-DMB, HLA-DOA, HLA-DPA1, HLA-DPB1, HLA-DQB1, HLA-DRA, HLA-DRB1, HLA-DRB4, IKZF1, IL7, IL10RA, IL2RB, IL7R, ITGAL, ITGB2, LCP1, LHFP, LYZ, MRC1, MS4A7, MYH9, NCF4, NFATC2, NOD2, P2RY13, PID1, PTPN22, PTPRC, RNF213, ROBO1, RUNX1, STAT4, TAP1, TCF4, TNFSF13B, VIM | 72 |
| Inflammatory Disease | systemic lupus erythematosus     | systemic lupus erythematosus             | 2,02E-10 | CD44, CLU, CXCL16, FCGR2A, FCGR2B, HLA-DRA, IL7R, ITGAM, PTPN22, PTPRC, SH2B3, SH2D1A, STAT4, TAP1, TNFSF13B                                                                                                                                                                                                                                                                                                                                                                                                                               | 15 |
| Inflammatory Disease | myocarditis                      | myocarditis                              | 1,50E-06 | CCR2, CCR5, CLU, PRF1, STAT4, TBX21                                                                                                                                                                                                                                                                                                                                                                                                                                                                                                        | 6  |
| Inflammatory Disease | myocarditis                      | myocarditis of mice                      | 6,67E-06 | CCR2, CCR5, PRF1, STAT4, TBX21                                                                                                                                                                                                                                                                                                                                                                                                                                                                                                             | 5  |
| Inflammatory Disease | experimentally-induced arthritis | experimentally-induced arthritis of mice | 1,96E-06 | ANXA1, CCR2, CD44, CTSS, FCGR2A, FCGR2B, IL2RB, STAT4, TBX21, TNFSF13B                                                                                                                                                                                                                                                                                                                                                                                                                                                                     | 10 |
| Inflammatory Disease | experimentally-induced arthritis | experimentally-induced arthritis         | 4,07E-06 | ANXA1, CCR2, CCR5, CD44, CTSS, FCGR2A, FCGR2B, IL2RB, STAT4, TBX21, TNFSF13B                                                                                                                                                                                                                                                                                                                                                                                                                                                               | 11 |
| Inflammatory Disease | dermatitis                       | dermatitis                               | 3,73E-06 | CASP1, CCL5, CD2, CD52, CD74, HLA-DRA, HLA-DRB1, IL2RB, IL2RG, ITGAL, ITGB2, LCP2, NFKBIZ                                                                                                                                                                                                                                                                                                                                                                                                                                                  | 13 |
| Inflammatory Disease | inflammatory bowel disease       | inflammatory bowel disease of mammalia   | 4,91E-06 | CASP1, CCR2, CCR5, CD44, IL7, MMP7, NOD2, STAT4, TGFB2                                                                                                                                                                                                                                                                                                                                                                                                                                                                                     | 9  |
| Inflammatory Disease | nephritis                        | nephritis                                | 5,14E-06 | CCL5, CD2, CD28, CD8A, CLU, CXCL16, FCGR2B, HLA-DQB1, ITGAL, PTPRC, TNFSF13B                                                                                                                                                                                                                                                                                                                                                                                                                                                               | 11 |
| Inflammatory Disease | multiple sclerosis               | multiple sclerosis                       | 8,26E-06 | ADRA2A, CASP1, CD52, CIITA, GFI1, HLA-DMB, HLA-DQB1, HLA-DRA, HLA-DRB1, HLA-F, IL7, IL7R, KLRB1, PTPRC                                                                                                                                                                                                                                                                                                                                                                                                                                     | 14 |
| Inflammatory Disease | colitis                          | colitis of mice                          | 8,67E-06 | CASP1, CCR2, CCR5, CD44, IL7, MMP7, STAT4, TGFB2                                                                                                                                                                                                                                                                                                                                                                                                                                                                                           | 8  |
| Inflammatory Disease | collagen-induced arthritis       | collagen-induced arthritis of mice       | 1,21E-05 | ANXA1, CCR2, CD44, CTSS, IL2RB, STAT4, TBX21, TNFSF13B                                                                                                                                                                                                                                                                                                                                                                                                                                                                                     | 8  |
| Cellular Movement    | migration                        | migration of leukocytes                  | 5,07E-21 | ANXA1, CCL5, CCR2, CCR5, CCR7, CD2, CD28, CD44, CD47, CD48, CD209, CD247, CD8A, CNN2, CSF1R, CTSS, CXCL9, CXCL16, CYTIP, ETS1, ETV6, FCGR2A, FYB, HCK, IL7, IL10RA, ITGAL, ITGAM, ITGAX, ITGB2, ITK, LCK, LTB4R, MMP7, MYH9, PRF1, PRKCB, PTPRC, RAC2, RASSF5, SELL, SELPLG, THBS2, TIMP2, TNFSF13B                                                                                                                                                                                                                                        | 45 |
| Cellular Movement    | migration                        | migration of mononuclear leukocytes      | 2,44E-19 | CCL5, CCR2, CCR5, CCR7, CD2, CD28, CD44, CD47, CD48, CD209, CD247, CD8A, CTSS, CXCL9, CXCL16, CYTIP, ETS1, ETV6, FYB, IL7, ITGAL, ITGAM, ITGAX, ITGB2, ITK, LCK, MYH9, PRF1, RASSF5, SELL, SELPLG, THBS2, TIMP2, TNFSF13B                                                                                                                                                                                                                                                                                                                  | 34 |
| Cellular Movement    | migration                        | migration of cells                       | 5,88E-19 | ADAM12, ADAM19, ANXA1, ARHGDIB, CCL5, CCR2, CCR5, CCR7, CD2, CD28, CD44, CD47, CD48, CD74, CD209, CD247, CD8A, CLDN11, CLU, CNN2, CSF1R, CSF2RB, CTSS, CXCL9, CXCL16, CYTIP, EBF1, ETS1, ETV6, FCGR2A, FYB, GFRA1, GZMB, HCK, HHEX, IL7, IL10RA, ITGAL, ITGAM, ITGAX, ITGB2, ITGB6, ITK, KLRK1, LCK, LTB4R, MARCKS, MMP7, MYH9, MYO1F, NDP, NR2F2, NRP1, PRF1, PRKCB, PTPRC, RAC2, RASSF5, RGS18, ROBO1, RUNX2, SELL, SELPLG, TGFB2, THBS2, TIMP2, TNFSF13B, TPM1                                                                          | 68 |
| Cellular Movement    | migration                        | Lymphocyte migration                     | 1,34E-17 | CCL5, CCR2, CCR5, CCR7, CD2, CD28, CD44, CD47, CD48, CD209, CD247, CD8A, CXCL9, CXCL16, CYTIP, ETS1, ETV6, FYB, IL7, ITGAL, ITGB2, ITK, LCK, MYH9, PRF1, RASSF5, SELL, SELPLG, THBS2, TIMP2, TNFSF13B                                                                                                                                                                                                                                                                                                                                      | 31 |
| Cellular Movement    | migration                        | migration of normal cells                | 1,38E-17 | ANXA1, CCL5, CCR2, CCR5, CCR7, CD2, CD28, CD44, CD47, CD48, CD209, CD247, CD8A, CLDN11, CLU, CNN2, CSF1R, CTSS, CXCL9, CXCL16, CYTIP, EBF1, ETS1, ETV6, FCGR2A, FYB, GFRA1, HCK, HHEX, IL7, IL10RA, ITGAL, ITGAM, ITGAX, ITGB2, ITGB6, ITK, LCK, LTB4R, MMP7, MYH9, NDP, NR2F2, NRP1, PRF1, PRKCB, PTPRC, RAC2, RASSF5, SELL, SELPLG, TGFB2, THBS2,                                                                                                                                                                                        | 55 |

|                   |               |                                       |          | TIMP2, TNFSF13B                                                                                                                                                                                                                                                                                                                                                                                                                        |    |
|-------------------|---------------|---------------------------------------|----------|----------------------------------------------------------------------------------------------------------------------------------------------------------------------------------------------------------------------------------------------------------------------------------------------------------------------------------------------------------------------------------------------------------------------------------------|----|
| Cellular Movement | migration     | migration of eukaryotic cells         | 2,82E-17 | ADAM12, ADAM19, ANXA1, ARHGDIB, CCL5, CCR2, CCR5, CCR7, CD2, CD28, CD44, CD47, CD48, CD74, CD209, CD247, CD8A, CLDN11, CLU, CNN2, CSF1R, CSF2RB, CTSS, CXCL9, CXCL16, CYTIP, EBF1, ETS1, ETV6, FCGR2A, FYB, GFRA1, GZMB, HCK, HHEX, IL7, IL10RA, ITGAL, ITGAM, ITGAX, ITGB2, ITGB6, ITK, KLRK1, LCK, LTB4R, MMP7, MYH9, NDP, NR2F2, NRP1, PRF1, PRKCB, PTPRC, RAC2, RASSF5, ROBO1, SELL, SELPLG, TGFB2, THBS2, TIMP2, TNFSF13B         | 63 |
| Cellular Movement | migration     | T cell migration                      | 1,62E-09 | CCL5, CCR2, CCR5, CCR7, CD28, CD44, CXCL9, CXCL16, FYB, IL7, ITGB2, ITK, LCK, PRF1, SELL, SELPLG, THBS2, TIMP2                                                                                                                                                                                                                                                                                                                         | 18 |
| Cellular Movement | migration     | migration of phagocytes               | 4,15E-08 | ANXA1, CCL5, CD47, CNN2, CSF1R, HCK, ITGAL, ITGAM, ITGAX, ITGB2, MMP7, RAC2, SELL                                                                                                                                                                                                                                                                                                                                                      | 13 |
| Cellular Movement | migration     | migration of neutrophils              | 1,42E-07 | ANXA1, CCL5, CD47, CNN2, HCK, ITGAL, ITGAM, ITGAX, ITGB2, MMP7, SELL                                                                                                                                                                                                                                                                                                                                                                   | 11 |
| Cellular Movement | migration     | migration of granulocytes             | 4,86E-07 | ANXA1, CCL5, CD47, CNN2, CXCL9, HCK, ITGAL, ITGAM, ITGAX, ITGB2, MMP7, SELL                                                                                                                                                                                                                                                                                                                                                            | 12 |
| Cellular Movement | migration     | migration of cell lines               | 5,03E-07 | ADAM12, ADAM19, ARHGDIB, CCL5, CCR2, CCR5, CCR7, CD44, CD47, CLU, CNN2, CSF1R, CSF2RB, CXCL9, ETS1, GZMB, HHEX, ITGAL, ITGAM, ITGB2, ITGB6, KLRK1, LCK, NRP1, RAC2, ROBO1, TIMP2                                                                                                                                                                                                                                                       | 27 |
| Cellular Movement | migration     | migration of leukemia cell lines      | 7,26E-07 | CCL5, CCR2, CD44, CD47, ITGAL, ITGB2, KLRK1, LCK                                                                                                                                                                                                                                                                                                                                                                                       | 8  |
| Cellular Movement | migration     | migration of antigen presenting cells | 1,49E-06 | CCL5, CCR2, CCR5, CCR7, CD44, CD209, CNN2, CSF1R, CXCL9, IL10RA, RAC2                                                                                                                                                                                                                                                                                                                                                                  | 11 |
| Cellular Movement | migration     | migration of dendritic cells          | 6,65E-06 | CCL5, CCR2, CCR5, CCR7, CD44, CD209, CXCL9, IL10RA, RAC2                                                                                                                                                                                                                                                                                                                                                                               | 9  |
| Cellular Movement | migration     | migration of monocytes                | 1,67E-05 | CCR2, CD47, CTSS, ITGAL, ITGAM, ITGAX, ITGB2, TIMP2                                                                                                                                                                                                                                                                                                                                                                                    | 8  |
| Cellular Movement | movement      | movement of eukaryotic cells          | 1,20E-17 | ADAM12, ADAM19, ANXA1, ARHGDIB, CCL5, CCR2, CCR5, CCR7, CD2, CD28, CD44, CD47, CD48, CD74, CD209, CD247, CD8A, CLDN11, CLU, CNN2, CSF1R, CSF2RB, CTSS, CXCL9, CXCL16, CYTIP, EBF1, ETS1, ETV6, FCGR2A, FYB, GFRA1, GZMB, HCK, HHEX, IL7, IL10RA, ITGAL, ITGAM, ITGAX, ITGB2, ITGB6, ITK, KLRK1, LCK, LTB4R, MARCKS, MMP7, MYH9, NDP, NR2F2, NRP1, PRF1, PRKCB, PTPRC, RAC2, RASSF5, ROBO1, SELL, SELPLG, TGFB2, THBS2, TIMP2, TNFSF13B | 64 |
| Cellular Movement | movement      | movement of cell lines                | 2,52E-07 | ADAM12, ADAM19, ARHGDIB, CCL5, CCR2, CCR5, CCR7, CD44, CD47, CLU, CNN2, CSF1R, CSF2RB, CXCL9, ETS1, GZMB, HHEX, ITGAL, ITGAM, ITGB2, ITGB6, KLRK1, LCK, MARCKS, NRP1, RAC2, ROBO1, TIMP2                                                                                                                                                                                                                                               | 28 |
| Cellular Movement | cell movement | cell movement                         | 2,04E-16 | ADRA2A, ANXA1, ARHGDIB, CASP1, CCL5, CCR2, CCR5, CCR7, CD2, CD28, CD44, CD47, CD48, CD209, CIITA, CLU, CSF1R, CTSS, CXCL9, CXCL16, DGKA, FCGR2A, FCGR2B, FLNA, GFRA1, HCK, IL2RB, ITGAL, ITGAM, ITGAX, ITGB2, ITK, JAK3, LCK, LCP1, LCP2, LTB4R, MARCKS, MYH9, NFATC2, NFKBIZ, NRP1, PRF1, PRKCB, PTPRC, RAC2, ROBO1, SELL, SELPLG, TGFB2, THBS2, TIMP2, TPBG, TPM1, VIM                                                               | 55 |
| Cellular Movement | cell movement | cell movement of eukaryotic cells     | 8,06E-16 | ANXA1, CASP1, CCL5, CCR2, CCR5, CCR7, CD2, CD28, CD44, CD47, CD48, CD209, CIITA, CLU, CSF1R, CTSS, CXCL9, CXCL16, DGKA, FCGR2A, FCGR2B, FLNA, GFRA1, HCK, IL2RB, ITGAL, ITGAM, ITGAX, ITGB2, ITK, JAK3, LCK, LCP1, LCP2, LTB4R, MYH9, NFATC2, NFKBIZ, NRP1, PRF1, PRKCB, PTPRC, RAC2, ROBO1, SELL, SELPLG, TGFB2, THBS2, TIMP2, TPBG                                                                                                   | 50 |
| Cellular Movement | cell movement | cell movement of normal cells         | 1,00E-15 | ANXA1, CASP1, CCL5, CCR2, CCR5, CCR7, CD2, CD28, CD44, CD47, CD48, CD209, CIITA, CSF1R, CTSS, CXCL9, CXCL16, DGKA, FCGR2A, FCGR2B, GFRA1, HCK, IL2RB, ITGAL, ITGAM, ITGAX, ITGB2, ITK, JAK3, LCP2, LTB4R, NFATC2, NFKBIZ, PRF1, PRKCB, PTPRC, RAC2, ROBO1, SELL, SELPLG, TGFB2, THBS2, TIMP2, TPBG                                                                                                                                     | 44 |
| Cellular Movement | cell movement | cell movement of blood cells          | 1,27E-15 | ANXA1, CASP1, CCL5, CCR2, CCR5, CCR7, CD2, CD28, CD44, CD47, CD48, CD209, CIITA, CSF1R, CTSS, CXCL9, CXCL16, FCGR2A, FCGR2B, HCK, IL2RB, ITGAL, ITGAM, ITGAX, ITGB2, ITK, JAK3, LTB4R, NFATC2, NFKBIZ, PRF1, PRKCB, PTPRC, RAC2, SELL, SELPLG, TGFB2, THBS2, TIMP2                                                                                                                                                                     | 39 |
| Cellular Movement | cell movement | cell movement of leukocytes           | 1,10E-13 | ANXA1, CASP1, CCL5, CCR2, CCR5, CCR7, CD2, CD28, CD44, CD47, CD48, CD209, CSF1R, CTSS, CXCL9, CXCL16, FCGR2A, FCGR2B, HCK, IL2RB, ITGAL, ITGAM, ITGAX, ITGB2, ITK, LTB4R, NFATC2, PRF1, PRKCB, PTPRC, RAC2, SELL, SELPLG, TGFB2, THBS2, TIMP2                                                                                                                                                                                          | 36 |

|                   |                |                                          |          |                                                                                                                                                                   |    |
|-------------------|----------------|------------------------------------------|----------|-------------------------------------------------------------------------------------------------------------------------------------------------------------------|----|
| Cellular Movement | cell movement  | cell movement of lymphatic system cells  | 2,75E-12 | ANXA1, CASP1, CCL5, CCR2, CD2, CD28, CD44, CD47, CD48, CXCL9, FCGR2A, HCK, IL2RB, ITGAL, ITGAM, ITGAX, ITGB2, ITK, LCP2, LTB4R, PTPRC, RAC2, SELL, SELPLG, TGFBR2 | 25 |
| Cellular Movement | cell movement  | cell movement of myeloid cells           | 9,23E-12 | ANXA1, CASP1, CCL5, CCR2, CD2, CD28, CD44, CD47, CD48, CXCL9, FCGR2A, HCK, IL2RB, ITGAL, ITGAM, ITGAX, ITGB2, ITK, LTB4R, PTPRC, RAC2, SELL, SELPLG, TGFBR2       | 24 |
| Cellular Movement | cell movement  | cell movement of granulocytes            | 5,64E-11 | ANXA1, CASP1, CCL5, CCR2, CD2, CD28, CD44, CD47, CD48, CXCL9, FCGR2A, HCK, IL2RB, ITGAL, ITGAM, ITGAX, ITGB2, ITK, LTB4R, RAC2, SELL, SELPLG, TGFBR2              | 23 |
| Cellular Movement | cell movement  | cell movement of mononuclear leukocytes  | 1,34E-10 | ANXA1, CCL5, CCR2, CCR5, CCR7, CD28, CD44, CD47, CTSS, CXCL9, CXCL16, ITGAL, ITGAX, ITGB2, ITK, NFATC2, PRF1, PRKCB, RAC2, SELL, SELPLG, THBS2, TIMP2             | 23 |
| Cellular Movement | cell movement  | cell movement of phagocytes              | 4,29E-09 | ANXA1, CASP1, CCL5, CCR2, CCR5, CD28, CD44, CD47, CSF1R, CXCL9, FCGR2A, HCK, ITGAL, ITGAM, ITGAX, ITGB2, LTB4R, RAC2, SELL, SELPLG, TGFBR2                        | 21 |
| Cellular Movement | cell movement  | cell movement of neutrophils             | 5,75E-09 | ANXA1, CASP1, CCL5, CCR2, CD28, CD44, CD47, FCGR2A, HCK, ITGAL, ITGAM, ITGAX, ITGB2, LTB4R, RAC2, SELL, SELPLG, TGFBR2                                            | 18 |
| Cellular Movement | cell movement  | cell movement of T lymphocytes           | 1,12E-07 | CCL5, CCR2, CCR5, CCR7, CD28, CD44, CXCL9, CXCL16, ITGB2, ITK, PRF1, SELL, SELPLG, THBS2                                                                          | 14 |
| Cellular Movement | cell movement  | cell movement of lymphocytes             | 5,42E-07 | CCL5, CCR2, CCR5, CCR7, CD28, CD44, CXCL9, CXCL16, ITGB2, ITK, NFATC2, PRF1, RAC2, SELL, SELPLG, THBS2                                                            | 16 |
| Cellular Movement | cell movement  | cell movement of eosinophils             | 9,47E-07 | CCL5, CD2, CD47, CD48, CXCL9, IL2RB, ITGAL, ITGAM, ITGB2, ITK                                                                                                     | 10 |
| Cellular Movement | cell movement  | cell movement of monocytes               | 2,11E-06 | ANXA1, CCL5, CCR2, CD47, CTSS, CXCL9, ITGAL, ITGAX, ITGB2, PRKCB, TIMP2                                                                                           | 11 |
| Cellular Movement | cell movement  | cell movement of memory T lymphocytes    | 6,67E-06 | CCL5, CCR7, CD28, CXCL9, ITGB2                                                                                                                                    | 5  |
| Cellular Movement | cell movement  | cell movement of bone marrow cells       | 7,72E-06 | ANXA1, CD44, CD47, CXCL9, ITGAL, ITGAM, ITGAX, ITGB2                                                                                                              | 8  |
| Cellular Movement | adhesion       | adhesion of T lymphocytes                | 1,51E-12 | CD2, CD44, CD47, CD48, CD209, CXCL9, FYB, IL7, ITGAL, ITGB2, ITK, RASSF5, SELL, SELPLG, THBS2                                                                     | 15 |
| Cellular Movement | transmigration | transmigration of leukocytes             | 1,62E-10 | ANXA1, CCL5, CCR7, CD28, CD44, CD47, CD209, CTSS, CXCL9, ITGAL, ITGAM, ITGAX, ITGB2, TIMP2                                                                        | 14 |
| Cellular Movement | transmigration | transmigration of mononuclear leukocytes | 2,95E-09 | CCL5, CCR7, CD28, CD44, CD47, CTSS, ITGAL, ITGAX, ITGB2, TIMP2                                                                                                    | 10 |
| Cellular Movement | transmigration | transmigration of eosinophils            | 2,43E-06 | CD47, CXCL9, ITGAL, ITGAM, ITGB2                                                                                                                                  | 5  |
| Cellular Movement | transmigration | transmigration of granulocytes           | 3,66E-06 | ANXA1, CD47, CXCL9, ITGAL, ITGAM, ITGAX, ITGB2                                                                                                                    | 7  |



|                   |                |                                        |          |                                                                                                                                                                                      |    |
|-------------------|----------------|----------------------------------------|----------|--------------------------------------------------------------------------------------------------------------------------------------------------------------------------------------|----|
| Cellular Movement | transmigration | transmigration of neutrophils          | 9,11E-06 | ANXA1, CD47, ITGAL, ITGAM, ITGAX, ITGB2                                                                                                                                              | 6  |
| Cellular Movement | transmigration | transmigration of monocytes            | 1,32E-05 | CD47, CTSS, ITGAL, ITGAX, ITGB2, TIMP2                                                                                                                                               | 6  |
| Cellular Movement | emigration     | emigration of leukocytes               | 1,03E-09 | ANXA1, CCR2, CCR7, CD44, CNN2, CYTIP, FCGR2A, ITGB2, SELL                                                                                                                            | 9  |
| Cellular Movement | cell rolling   | cell rolling                           | 2,88E-09 | ANXA1, CCR2, CCR7, CD44, CD209, FCGR2A, ITGAM, ITGB2, RAC2, SELL, SELPLG                                                                                                             | 11 |
| Cellular Movement | cell rolling   | cell rolling of leukocytes             | 8,21E-09 | ANXA1, CCR2, CCR7, CD44, FCGR2A, ITGAM, ITGB2, RAC2, SELL, SELPLG                                                                                                                    | 10 |
| Cellular Movement | cell rolling   | cell rolling of granulocytes           | 1,52E-05 | ANXA1, ITGB2, RAC2, SELL, SELPLG                                                                                                                                                     | 5  |
| Cellular Movement | cell rolling   | cell rolling of mononuclear leukocytes | 1,52E-05 | CCR2, CCR7, ITGB2, SELL, SELPLG                                                                                                                                                      | 5  |
| Cellular Movement | homing         | homing of eukaryotic cells             | 5,55E-09 | ANXA1, CCL5, CCR2, CCR5, CCR7, CD28, CD44, CD47, CXCL9, CXCL16, DGKA, FCGR2A, GFRA1, HCK, ITGAL, ITGAM, ITGB2, LCK, LTB4R, NRP1, PRKCB, PTPRC, RAC2, ROBO1, SELPLG, THBS2            | 26 |
| Cellular Movement | homing         | homing of normal cells                 | 4,08E-08 | ANXA1, CCL5, CCR2, CCR5, CCR7, CD28, CD44, CXCL9, CXCL16, FCGR2A, GFRA1, HCK, ITGAL, ITGAM, ITGB2, LTB4R, PRKCB, PTPRC, RAC2, ROBO1, SELPLG, THBS2                                   | 22 |
| Cellular Movement | homing         | homing of leukocytes                   | 1,40E-07 | ANXA1, CCL5, CCR2, CCR5, CCR7, CD28, CXCL9, CXCL16, FCGR2A, HCK, ITGAL, ITGAM, ITGB2, LTB4R, PRKCB, PTPRC, RAC2, SELPLG, THBS2                                                       | 19 |
| Cellular Movement | homing         | homing of lymphatic system cells       | 3,55E-06 | ANXA1, CCL5, CD28, CD44, CXCL9, FCGR2A, HCK, ITGAM, ITGB2, LTB4R, PTPRC, RAC2                                                                                                        | 12 |
| Cellular Movement | invasion       | invasion of eukaryotic cells           | 6,01E-09 | AGAP2, ANXA1, BATF3, CCR7, CD44, CD53, CLU, CTSS, ETS1, ETV6, GFRA1, GZMB, HHEX, ITGB2, ITGB6, LCP1, LEF1, MARCKS, NFATC2, NRP1, PRKCB, RUNX2, TFPI2, TGFB2, THBS2, TIMP2, TRIO, VIM | 28 |
| Cellular Movement | invasion       | invasion of cell lines                 | 4,13E-06 | ANXA1, BATF3, CCR7, CD44, CTSS, ETS1, ETV6, GFRA1, HHEX, ITGB2, ITGB6, LCP1, LEF1, MARCKS, NFATC2, NRP1, PRKCB, TFPI2, TIMP2, TRIO, VIM                                              | 21 |
| Cellular Movement | chemotaxis     | chemotaxis of cells                    | 7,02E-09 | ANXA1, CCL5, CCR2, CCR5, CCR7, CD28, CD44, CD47, CXCL9, CXCL16, DGKA, FCGR2A, GFRA1, HCK, ITGAL, ITGAM, ITGB2, LCK, LTB4R, NRP1, PRKCB, PTPRC, RAC2, ROBO1, SELPLG, THBS2            | 26 |
| Cellular Movement | chemotaxis     | chemotaxis of eukaryotic cells         | 7,86E-09 | ANXA1, CCL5, CCR2, CCR5, CCR7, CD28, CD47, CXCL9, CXCL16, DGKA, FCGR2A, GFRA1, HCK, ITGAL, ITGAM, ITGB2, LCK, LTB4R, NRP1, PRKCB, PTPRC, RAC2, ROBO1, SELPLG, THBS2                  | 25 |
| Cellular Movement | chemotaxis     | chemotaxis of normal cells             | 3,46E-07 | ANXA1, CCL5, CCR2, CCR5, CCR7, CD28, CXCL9, CXCL16, FCGR2A, GFRA1, HCK, ITGAL, ITGAM, ITGB2, LTB4R, PRKCB, PTPRC, RAC2, ROBO1, THBS2                                                 | 20 |
| Cellular Movement | chemotaxis     | chemotaxis of leukocytes               | 3,58E-07 | ANXA1, CCL5, CCR2, CCR5, CCR7, CD28, CXCL9, CXCL16, FCGR2A, HCK, ITGAL, ITGAM, ITGB2, LTB4R, PRKCB, PTPRC, RAC2, THBS2                                                               | 18 |
| Cellular Movement | chemotaxis     | chemotaxis of myeloid cells            | 9,94E-06 | ANXA1, CCL5, CD28, CXCL9, FCGR2A, HCK, ITGAM, ITGB2, LTB4R, PTPRC, RAC2                                                                                                              | 11 |
| Cellular Movement | extravasation  | extravasation of leukocytes            | 4,14E-07 | CCL5, CCR2, CCR5, CD44, ITGAM, ITGB2, SELL                                                                                                                                           | 7  |
| Cellular Movement | extravasation  | extravasation                          | 1,59E-06 | CCL5, CCR2, CCR5, CD44, ITGAM, ITGB2, ITK, SELL                                                                                                                                      | 8  |
| Cellular Movement | recruitment    | recruitment of T lymphocytes           | 5,16E-07 | CCL5, CCR2, CCR7, CD44, CD8A, CXCL9, CXCL16, ETS1                                                                                                                                    | 8  |
| Cellular Movement | infiltration   | infiltration of cells                  | 7,71E-07 | CCR2, CCR5, CCR7, CD44, CIITA, CSF1R, FCGR2B, ITGAM, ITK, JAK3, LCP2, NFATC2, NFKBIZ, NRP1, PRF1, SELPLG                                                                             | 16 |
| Cellular Movement | infiltration   | infiltration by neutrophils            | 1,14E-06 | ANXA1, CASP1, CCR2, CD44, ITGAL, ITGAM, ITGB2, LTB4R, RAC2, SELL, TGFB2                                                                                                              | 11 |
| Cellular Movement | egression      | egression of                           | 1,64E-   | CCR2, CCR5, CCR7, ITGAM, ITGB2                                                                                                                                                       | 5  |

|                             |                            |                                         |          |                                                                                                                                                                                                                                                                                                                                                                                                                                                                                                                                                                                                                                                                                                                  |    |
|-----------------------------|----------------------------|-----------------------------------------|----------|------------------------------------------------------------------------------------------------------------------------------------------------------------------------------------------------------------------------------------------------------------------------------------------------------------------------------------------------------------------------------------------------------------------------------------------------------------------------------------------------------------------------------------------------------------------------------------------------------------------------------------------------------------------------------------------------------------------|----|
| Movement                    |                            | leukocytes                              | 06       |                                                                                                                                                                                                                                                                                                                                                                                                                                                                                                                                                                                                                                                                                                                  |    |
| Cellular Movement           | trafficking                | trafficking of cells                    | 2,60E-06 | ANXA1, CCL5, CCR2, CCR5, CD44, ITGB2, MARCKS                                                                                                                                                                                                                                                                                                                                                                                                                                                                                                                                                                                                                                                                     | 7  |
| Cellular Movement           | trafficking                | trafficking of phagocytes               | 3,84E-06 | CCL5, CCR5, ITGB2                                                                                                                                                                                                                                                                                                                                                                                                                                                                                                                                                                                                                                                                                                | 3  |
| Cellular Movement           | trafficking                | trafficking of leukocytes               | 6,13E-06 | ANXA1, CCL5, CCR2, CCR5, CD44, ITGB2                                                                                                                                                                                                                                                                                                                                                                                                                                                                                                                                                                                                                                                                             | 6  |
| Cellular Movement           | trafficking                | trafficking of antigen presenting cells | 1,52E-05 | CCL5, CCR2, CCR5                                                                                                                                                                                                                                                                                                                                                                                                                                                                                                                                                                                                                                                                                                 | 3  |
| Connective Tissue Disorders | connective tissue disorder | connective tissue disorder              | 1,12E-20 | ADRA2A, ANAPC4, ANTXR1, ANTXR2, ANXA1, ARHGDIB, ATM, BICD1, CASP1, CCL5, CCR2, CCR5, CD28, CD44, CD53, CD74, CD96, CD3D, CDC7, CELF2, CIITA, CLU, COL4A4 (includes EG:1286), COL6A3, CSF2RB, CTSS, CXCL9, CXCL16, DEF6, EBF1, FCGR2A, FCGR2B, FLI1, FLNA, FMNL2 (includes EG:114793), FUBP1, GABRP, GAS7, GBP2, GZMA, GZMB, HCK, HCLS1, HLA-B, HLA-C, HLA-DMB, HLA-DOA, HLA-DPA1, HLA-DPB1, HLA-DQB1, HLA-DRA, HLA-DRB1, HLA-DRB4, IKZF1, IL7, IL10RA, IL2RB, IL7R, ITGAL, ITGAM, ITGB2, LCK, LCP1, LHFP, LYZ, MAP4K1, MMP7, MRC1, MS4A7, MYH9, NCF4, NFATC2, NLRP3, NOD2, P2RY13, PID1, PRKCB, PTPN22, PTPRC, RNF213, ROBO1, RUNX1, SH2B3, SH2D1A, STAT4, TAP1, TBX21, TCF4, TFPI2, THBS2, TIMP2, TNFSF13B, VIM | 93 |
| Connective Tissue Disorders | rheumatic disease          | rheumatic disease                       | 4,48E-18 | ADRA2A, ANAPC4, ANTXR1, ANXA1, ARHGDIB, ATM, BICD1, CASP1, CCL5, CCR2, CCR5, CD28, CD44, CD53, CD74, CD3D, CDC7, CELF2, CIITA, CLU, CSF2RB, CTSS, CXCL9, CXCL16, DEF6, EBF1, FCGR2A, FCGR2B, FLI1, FMNL2 (includes EG:114793), FUBP1, GABRP, GAS7, GBP2, GZMA, GZMB, HCK, HCLS1, HLA-B, HLA-C, HLA-DMB, HLA-DOA, HLA-DPA1, HLA-DPB1, HLA-DQB1, HLA-DRA, HLA-DRB1, HLA-DRB4, IKZF1, IL7, IL10RA, IL2RB, IL7R, ITGAL, ITGAM, ITGB2, LCK, LCP1, LHFP, LYZ, MAP4K1, MRC1, MS4A7, MYH9, NCF4, NFATC2, NLRP3, NOD2, P2RY13, PID1, PRKCB, PTPN22, PTPRC, RNF213, ROBO1, RUNX1, SH2B3, SH2D1A, STAT4, TAP1, TBX21, TCF4, TFPI2, THBS2, TNFSF13B, VIM                                                                     | 86 |
| Connective Tissue Disorders | rheumatic disease          | rheumatic disease of mammalia           | 4,36E-10 | ANXA1, CASP1, CCL5, CCR2, CD44, CIITA, CTSS, DEF6, FCGR2A, FCGR2B, HLA-DRB1, IL7, IL2RB, SH2D1A, STAT4, TAP1, TBX21, TNFSF13B                                                                                                                                                                                                                                                                                                                                                                                                                                                                                                                                                                                    | 18 |
| Connective Tissue Disorders | rheumatic disease          | rheumatic disease of rodents            | 1,62E-09 | ANXA1, CASP1, CCL5, CCR2, CD44, CIITA, CTSS, DEF6, FCGR2A, FCGR2B, IL7, IL2RB, SH2D1A, STAT4, TAP1, TBX21, TNFSF13B                                                                                                                                                                                                                                                                                                                                                                                                                                                                                                                                                                                              | 17 |
| Connective Tissue Disorders | rheumatic disease          | rheumatic disease of mice               | 4,15E-09 | ANXA1, CASP1, CCR2, CD44, CIITA, CTSS, DEF6, FCGR2A, FCGR2B, IL7, IL2RB, SH2D1A, STAT4, TAP1, TBX21, TNFSF13B                                                                                                                                                                                                                                                                                                                                                                                                                                                                                                                                                                                                    | 16 |
| Connective Tissue Disorders | arthritis                  | arthritis                               | 7,13E-17 | ADRA2A, ANAPC4, ANTXR1, ANXA1, ARHGDIB, ATM, BICD1, CASP1, CCL5, CCR2, CCR5, CD28, CD44, CD53, CD74, CD3D, CDC7, CELF2, CIITA, CLU, CSF2RB, CTSS, CXCL9, CXCL16, DEF6, EBF1, FCGR2A, FCGR2B, FLI1, FMNL2 (includes EG:114793), FUBP1, GABRP, GAS7, GBP2, GZMA, GZMB, HCK, HCLS1, HLA-B, HLA-C, HLA-DMB, HLA-DOA, HLA-DPA1, HLA-DPB1, HLA-DQB1, HLA-DRA, HLA-DRB1, HLA-DRB4, IKZF1, IL7, IL10RA, IL2RB, IL7R, ITGAL, ITGB2, LCP1, LHFP, LYZ, MAP4K1, MRC1, MS4A7, MYH9, NCF4, NFATC2, NLRP3, NOD2, P2RY13, PID1, PRKCB, PTPN22, PTPRC, RNF213, ROBO1, RUNX1, STAT4, TAP1, TBX21, TCF4, TFPI2, THBS2, TNFSF13B, VIM                                                                                                | 82 |
| Connective Tissue Disorders | arthritis                  | arthritis of mammalia                   | 7,12E-09 | ANXA1, CASP1, CCL5, CCR2, CD44, CIITA, CTSS, DEF6, FCGR2A, FCGR2B, HLA-DRB1, IL7, IL2RB, STAT4, TBX21, TNFSF13B                                                                                                                                                                                                                                                                                                                                                                                                                                                                                                                                                                                                  | 16 |
| Connective Tissue Disorders | arthritis                  | arthritis of rodents                    | 3,36E-08 | ANXA1, CASP1, CCL5, CCR2, CD44, CIITA, CTSS, DEF6, FCGR2A, FCGR2B, IL7, IL2RB, STAT4, TBX21, TNFSF13B                                                                                                                                                                                                                                                                                                                                                                                                                                                                                                                                                                                                            | 15 |
| Connective Tissue Disorders | arthritis                  | arthritis of mice                       | 8,71E-08 | ANXA1, CASP1, CCR2, CD44, CIITA, CTSS, DEF6, FCGR2A, FCGR2B, IL7, IL2RB, STAT4, TBX21, TNFSF13B                                                                                                                                                                                                                                                                                                                                                                                                                                                                                                                                                                                                                  | 14 |
| Connective Tissue Disorders | rheumatoid arthritis       | rheumatoid arthritis                    | 1,24E-14 | ANAPC4, ANTXR1, ANXA1, ARHGDIB, ATM, BICD1, CCL5, CCR2, CCR5, CD28, CD44, CD53, CD74, CD3D, CDC7, CELF2, CIITA, CLU, CSF2RB, CXCL9, CXCL16, DEF6, EBF1, FCGR2A, FCGR2B, FLI1, FMNL2 (includes EG:114793), FUBP1, GABRP, GAS7, GBP2, GZMA, GZMB, HCK, HCLS1, HLA-C, HLA-DMB, HLA-DOA, HLA-DPA1, HLA-DPB1, HLA-DQB1, HLA-DRA, HLA-DRB1, HLA-DRB4, IKZF1, IL7, IL10RA, IL2RB, IL7R, ITGAL, ITGB2, LCP1, LHFP, LYZ,                                                                                                                                                                                                                                                                                                  | 72 |

|                             |                                  |                                          |          |                                                                                                                                                                                                                                                                                                                                                            |    |
|-----------------------------|----------------------------------|------------------------------------------|----------|------------------------------------------------------------------------------------------------------------------------------------------------------------------------------------------------------------------------------------------------------------------------------------------------------------------------------------------------------------|----|
| Connective Tissue Disorders | systemic lupus erythematosus     | systemic lupus erythematosus             | 2,02E-10 | MRC1, MS4A7, MYH9, NCF4, NFATC2, NOD2, P2RY13, PID1, PTPN22, PTPRC, RNF213, ROBO1, RUNX1, STAT4, TAP1, TCF4, TNFSF13B, VIM CD44, CLU, CXCL16, FCGR2A, FCGR2B, HLA-DRA, IL7R, ITGAM, PTPN22, PTPRC, SH2B3, SH2D1A, STAT4, TAP1, TNFSF13B                                                                                                                    | 15 |
| Connective Tissue Disorders | experimentally-induced arthritis | experimentally-induced arthritis of mice | 1,96E-06 | ANXA1, CCR2, CD44, CTSS, FCGR2A, FCGR2B, IL2RB, STAT4, TBX21, TNFSF13B                                                                                                                                                                                                                                                                                     | 10 |
| Connective Tissue Disorders | experimentally-induced arthritis | experimentally-induced arthritis         | 4,07E-06 | ANXA1, CCR2, CCR5, CD44, CTSS, FCGR2A, FCGR2B, IL2RB, STAT4, TBX21, TNFSF13B                                                                                                                                                                                                                                                                               | 11 |
| Connective Tissue Disorders | collagen-induced arthritis       | collagen-induced arthritis of mice       | 1,21E-05 | ANXA1, CCR2, CD44, CTSS, IL2RB, STAT4, TBX21, TNFSF13B                                                                                                                                                                                                                                                                                                     | 8  |
| Tissue Development          | adhesion                         | adhesion of cells                        | 4,20E-18 | ADAM12, AMICA1, ANXA1, ARHGDI1, CCL5, CCR2, CCR5, CD2, CD28, CD44, CD47, CD48, CD84, CD96, CD209, CD8A, CLDN11, CLEC7A, CLU, CXCL9, CXCL16, CYTIP, EMB, ETS1, FCGR2A, FYB, GF11, GFRA1, GZMB, HCK, IL7, ITGAL, ITGAM, ITGAX, ITGB2, ITGB6, ITK, LCK, LCP1, LTB4R, MARCKS, MYH9, MYO1F, PARVG, PTPRC, RAC2, RASSF5, ROBO1, SELL, SELPLG, TGFB2, THBS2, VAV1 | 53 |
| Tissue Development          | adhesion                         | adhesion of leukocytes                   | 5,52E-17 | ANXA1, CCL5, CD2, CD28, CD44, CD47, CD48, CD209, CXCL9, FCGR2A, FYB, HCK, IL7, ITGAL, ITGAM, ITGAX, ITGB2, ITK, LCP1, LTB4R, PTPRC, RAC2, RASSF5, SELL, SELPLG, TGFB2, THBS2, VAV1                                                                                                                                                                         | 28 |
| Tissue Development          | adhesion                         | adhesion of mononuclear leukocytes       | 1,06E-16 | CCL5, CD2, CD28, CD44, CD47, CD48, CD209, CXCL9, FYB, IL7, ITGAL, ITGAM, ITGAX, ITGB2, ITK, LCP1, RASSF5, SELL, SELPLG, TGFB2, THBS2, VAV1                                                                                                                                                                                                                 | 22 |
| Tissue Development          | adhesion                         | adhesion of normal cells                 | 5,75E-16 | ADAM12, AMICA1, ANXA1, CCL5, CD2, CD28, CD44, CD47, CD48, CD209, CD8A, CXCL9, CXCL16, FCGR2A, FYB, GZMB, HCK, IL7, ITGAL, ITGAM, ITGAX, ITGB2, ITK, LCP1, LTB4R, PTPRC, RAC2, RASSF5, SELL, SELPLG, TGFB2, THBS2, VAV1                                                                                                                                     | 33 |
| Tissue Development          | adhesion                         | adhesion of blood cells                  | 6,59E-16 | ANXA1, CCL5, CD2, CD28, CD44, CD47, CD48, CD209, CXCL9, FCGR2A, FYB, GZMB, HCK, IL7, ITGAL, ITGAM, ITGAX, ITGB2, ITK, LCP1, LTB4R, PTPRC, RAC2, RASSF5, SELL, SELPLG, TGFB2, THBS2, VAV1                                                                                                                                                                   | 29 |
| Tissue Development          | adhesion                         | adhesion of eukaryotic cells             | 2,78E-15 | ADAM12, AMICA1, ANXA1, CCL5, CD2, CD28, CD44, CD47, CD48, CD209, CD8A, CXCL9, CXCL16, CYTIP, ETS1, FCGR2A, FYB, GF11, GZMB, HCK, IL7, ITGAL, ITGAM, ITGAX, ITGB2, ITK, LCP1, LTB4R, MARCKS, MYH9, PARVG, PTPRC, RAC2, RASSF5, SELL, SELPLG, TGFB2, THBS2, VAV1                                                                                             | 39 |
| Tissue Development          | adhesion                         | adhesion of T lymphocytes                | 1,51E-12 | CD2, CD44, CD47, CD48, CD209, CXCL9, FYB, IL7, ITGAL, ITGB2, ITK, RASSF5, SELL, SELPLG, THBS2                                                                                                                                                                                                                                                              | 15 |
| Tissue Development          | adhesion                         | adhesion of lymphocytes                  | 5,56E-12 | CD2, CD28, CD44, CD47, CD48, CD209, CXCL9, FYB, IL7, ITGAL, ITGB2, ITK, RASSF5, SELL, SELPLG, THBS2                                                                                                                                                                                                                                                        | 16 |
| Tissue Development          | adhesion                         | adhesion of neutrophils                  | 6,75E-09 | ANXA1, CD44, ITGAL, ITGAM, ITGAX, ITGB2, LCP1, SELL, SELPLG, VAV1                                                                                                                                                                                                                                                                                          | 10 |
| Tissue Development          | adhesion                         | adhesion of granulocytes                 | 2,67E-08 | ANXA1, CD44, HCK, ITGAL, ITGAM, ITGAX, ITGB2, LCP1, SELL, SELPLG, VAV1                                                                                                                                                                                                                                                                                     | 11 |
| Tissue Development          | adhesion                         | adhesion of endothelial tissue           | 9,94E-08 | ANXA1, CD209, ITGAM, ITGB2, SELL, VAV1                                                                                                                                                                                                                                                                                                                     | 6  |
| Tissue Development          | adhesion                         | adhesion of tumor cell lines             | 4,00E-07 | ADAM12, ANXA1, CD28, CD44, CD47, CYTIP, ETS1, GZMB, ITGAL, ITGAM, ITGAX, ITGB2, MARCKS, MYH9, PARVG, SELPLG                                                                                                                                                                                                                                                | 16 |
| Tissue Development          | adhesion                         | adhesion of antigen presenting cells     | 4,14E-07 | CD2, CD44, CD48, CD209, ITGAL, ITGAM, ITGB2                                                                                                                                                                                                                                                                                                                | 7  |
| Tissue Development          | adhesion                         | adhesion of endothelial                  | 5,38E-07 | AMICA1, CCL5, CD44, ITGAL, ITGAM, ITGAX, ITGB2, SELL, SELPLG, TGFB2                                                                                                                                                                                                                                                                                        | 10 |

|                    |              |                                        |          |                                                                                                                                                                            |    |
|--------------------|--------------|----------------------------------------|----------|----------------------------------------------------------------------------------------------------------------------------------------------------------------------------|----|
| nt                 |              | cells                                  |          |                                                                                                                                                                            |    |
| Tissue Development | adhesion     | adhesion of leukemia cells             | 2,01E-06 | AMICA1, CD44, ITGB2, SELL                                                                                                                                                  | 4  |
| Tissue Development | adhesion     | adhesion of cell lines                 | 2,12E-06 | ADAM12, ANXA1, CD28, CD44, CD47, CYTIP, ETS1, GFI1, GZMB, ITGAL, ITGAM, ITGAX, ITGB2, MARCKS, MYH9, PARVG, SELL, SELPLG                                                    | 18 |
| Tissue Development | adhesion     | adhesion of monocytes                  | 5,07E-06 | CCL5, ITGAM, ITGAX, ITGB2, LCP1, TGFBR2, VAV1                                                                                                                              | 7  |
| Tissue Development | adhesion     | adhesion of dendritic cells            | 7,05E-06 | CD44, CD209, ITGAL, ITGAM                                                                                                                                                  | 4  |
| Tissue Development | adhesion     | adhesion of leukocyte cell lines       | 1,32E-05 | ANXA1, GFI1, ITGAL, ITGAM, ITGB2, SELL                                                                                                                                     | 6  |
| Tissue Development | aggregation  | aggregation of cells                   | 1,41E-14 | ADRA2A, CCL5, CD2, CD44, CD47, CD209, CLU, CP, CXCL9, ETV6, FCGR2A, HCLS1, IL7, ITGAL, ITGAM, ITGB2, LCK, LCP2, MMP7, NRP1, PTPRC, RUNX2, SELL, SELPLG, THBS2, TIMP2, VAV1 | 27 |
| Tissue Development | aggregation  | aggregation of blood cells             | 1,75E-12 | ADRA2A, CCL5, CD44, CD47, CD209, CXCL9, FCGR2A, HCLS1, IL7, ITGAL, ITGAM, ITGB2, LCK, LCP2, NRP1, SELL, SELPLG, THBS2, TIMP2, VAV1                                         | 20 |
| Tissue Development | aggregation  | aggregation of leukocytes              | 2,37E-09 | CD44, CD209, IL7, ITGAL, ITGAM, ITGB2, LCK, NRP1, SELL, SELPLG                                                                                                             | 10 |
| Tissue Development | aggregation  | aggregation of leukocyte cell lines    | 2,17E-07 | CD2, CD47, ITGAL, ITGAM, ITGB2                                                                                                                                             | 5  |
| Tissue Development | aggregation  | aggregation of phagocytes              | 4,88E-06 | ITGAM, ITGB2, LCK, SELL, SELPLG                                                                                                                                            | 5  |
| Tissue Development | aggregation  | aggregation of blood platelets         | 9,79E-06 | ADRA2A, CCL5, CD47, FCGR2A, HCLS1, LCP2, SELL, THBS2, TIMP2, VAV1                                                                                                          | 10 |
| Tissue Development | aggregation  | aggregation of neutrophils             | 1,16E-05 | ITGAM, ITGB2, SELL, SELPLG                                                                                                                                                 | 4  |
| Tissue Development | accumulation | accumulation of leukocytes             | 7,14E-12 | CCL5, CCR2, CCR5, CCR7, CD28, CXCL9, CYBB, DEF6, GFI1, IL7, IL10RA, IL2RG, ITGAL, ITGAM, ITGAX, ITGB2, NFATC2, SELL, SELPLG, TIMP2                                         | 20 |
| Tissue Development | accumulation | accumulation of cells                  | 2,86E-11 | AHR, CCL5, CCR2, CCR5, CCR7, CD28, CLU, CXCL9, CYBB, DEF6, GFI1, IL7, IL10RA, IL2RG, ITGAL, ITGAM, ITGAX, ITGB2, NFATC2, RAC2, SELL, SELPLG, TIMP2                         | 23 |
| Tissue Development | accumulation | accumulation of mononuclear leukocytes | 3,74E-10 | CCL5, CCR5, CCR7, CD28, DEF6, GFI1, IL7, IL10RA, IL2RG, ITGAL, ITGB2, NFATC2, SELL                                                                                         | 13 |
| Tissue Development | accumulation | accumulation of lymphocytes            | 1,36E-09 | CCL5, CCR5, CCR7, CD28, DEF6, IL7, IL10RA, IL2RG, ITGAL, ITGB2, NFATC2, SELL                                                                                               | 12 |
| Tissue Development | accumulation | accumulation of T lymphocytes          | 1,45E-07 | CCL5, CCR5, CCR7, CD28, DEF6, IL10RA, IL2RG, ITGAL, NFATC2                                                                                                                 | 9  |
| Tissue Development | generation   | generation of leukocytes               | 3,87E-10 | CD28, HLA-DQB1, IL7, IL10RA, IL2RG, IL7R, IRF4, IRF8, ITK, JAK3, NOTCH2, STAT4, TBX21, TNFSF13B                                                                            | 14 |
| Tissue Development | generation   | generation of lymphocytes              | 4,39E-10 | CD28, HLA-DQB1, IL7, IL10RA, IL2RG, IL7R, IRF4, ITK, JAK3, NOTCH2, STAT4, TBX21, TNFSF13B                                                                                  | 13 |
| Tissue Development | generation   | generation of normal cells             | 3,09E-08 | ATM, CD28, HLA-DQB1, IL7, IL10RA, IL2RG, IL7R, IRF4, IRF8, ITK, JAK3, NOTCH2, STAT4, TBX21, TNFSF13B                                                                       | 15 |
| Tissue Development | generation   | generation of T lymphocytes            | 5,48E-08 | CD28, HLA-DQB1, IL7, IL10RA, IL2RG, ITK, JAK3, STAT4, TBX21, TNFSF13B                                                                                                      | 10 |

|                                 |                                |                                 |          |                                                                                                                                                                                                                                                                                                                                                                                                                                                                                                                                                                                                                                                                                                                                                                                             |     |
|---------------------------------|--------------------------------|---------------------------------|----------|---------------------------------------------------------------------------------------------------------------------------------------------------------------------------------------------------------------------------------------------------------------------------------------------------------------------------------------------------------------------------------------------------------------------------------------------------------------------------------------------------------------------------------------------------------------------------------------------------------------------------------------------------------------------------------------------------------------------------------------------------------------------------------------------|-----|
| Tissue Development              | generation                     | generation of Th1 cells         | 7,05E-06 | CD28, JAK3, STAT4, TBX21                                                                                                                                                                                                                                                                                                                                                                                                                                                                                                                                                                                                                                                                                                                                                                    | 4   |
| Tissue Development              | cell-cell contact              | cell-cell contact of leukocytes | 2,94E-07 | ITGAL, ITGAM, ITGAX, ITGB2                                                                                                                                                                                                                                                                                                                                                                                                                                                                                                                                                                                                                                                                                                                                                                  | 4   |
| Skeletal and Muscular Disorders | rheumatic disease              | rheumatic disease               | 4,48E-18 | ADRA2A, ANAPC4, ANTXR1, ANXA1, ARHGDIB, ATM, BICD1, CASP1, CCL5, CCR2, CCR5, CD28, CD44, CD53, CD74, CD3D, CDC7, CELF2, CIITA, CLU, CSF2RB, CTSS, CXCL9, CXCL16, DEF6, EBF1, FCGR2A, FCGR2B, FLI1, FMNL2 (includes EG:114793), FUBP1, GABRP, GAS7, GBP2, GZMA, GZMB, HCK, HCLS1, HLA-B, HLA-C, HLA-DMB, HLA-DOA, HLA-DPA1, HLA-DPB1, HLA-DQB1, HLA-DRA, HLA-DRB1, HLA-DRB4, IKZF1, IL7, IL10RA, IL2RB, IL7R, ITGAL, ITGAM, ITGB2, LCK, LCP1, LHFP, LYZ, MAP4K1, MRC1, MS4A7, MYH9, NCF4, NFATC2, NLRP3, NOD2, P2RY13, PID1, PRKCB, PTPN22, PTPRC, RNF213, ROBO1, RUNX1, SH2B3, SH2D1A, STAT4, TAP1, TBX21, TCF4, TFPI2, THBS2, TNFSF13B, VIM                                                                                                                                                | 86  |
| Skeletal and Muscular Disorders | rheumatic disease              | rheumatic disease of mammalia   | 4,36E-10 | ANXA1, CASP1, CCL5, CCR2, CD44, CIITA, CTSS, DEF6, FCGR2A, FCGR2B, HLA-DRB1, IL7, IL2RB, SH2D1A, STAT4, TAP1, TBX21, TNFSF13B                                                                                                                                                                                                                                                                                                                                                                                                                                                                                                                                                                                                                                                               | 18  |
| Skeletal and Muscular Disorders | rheumatic disease              | rheumatic disease of rodents    | 1,62E-09 | ANXA1, CASP1, CCL5, CCR2, CD44, CIITA, CTSS, DEF6, FCGR2A, FCGR2B, IL7, IL2RB, SH2D1A, STAT4, TAP1, TBX21, TNFSF13B                                                                                                                                                                                                                                                                                                                                                                                                                                                                                                                                                                                                                                                                         | 17  |
| Skeletal and Muscular Disorders | rheumatic disease              | rheumatic disease of mice       | 4,15E-09 | ANXA1, CASP1, CCR2, CD44, CIITA, CTSS, DEF6, FCGR2A, FCGR2B, IL7, IL2RB, SH2D1A, STAT4, TAP1, TBX21, TNFSF13B                                                                                                                                                                                                                                                                                                                                                                                                                                                                                                                                                                                                                                                                               | 16  |
| Skeletal and Muscular Disorders | arthritis                      | arthritis                       | 7,13E-17 | ADRA2A, ANAPC4, ANTXR1, ANXA1, ARHGDIB, ATM, BICD1, CASP1, CCL5, CCR2, CCR5, CD28, CD44, CD53, CD74, CD3D, CDC7, CELF2, CIITA, CLU, CSF2RB, CTSS, CXCL9, CXCL16, DEF6, EBF1, FCGR2A, FCGR2B, FLI1, FMNL2 (includes EG:114793), FUBP1, GABRP, GAS7, GBP2, GZMA, GZMB, HCK, HCLS1, HLA-B, HLA-C, HLA-DMB, HLA-DOA, HLA-DPA1, HLA-DPB1, HLA-DQB1, HLA-DRA, HLA-DRB1, HLA-DRB4, IKZF1, IL7, IL10RA, IL2RB, IL7R, ITGAL, ITGB2, LCP1, LHFP, LYZ, MAP4K1, MRC1, MS4A7, MYH9, NCF4, NFATC2, NLRP3, NOD2, P2RY13, PID1, PRKCB, PTPN22, PTPRC, RNF213, ROBO1, RUNX1, STAT4, TAP1, TBX21, TCF4, TFPI2, THBS2, TNFSF13B, VIM                                                                                                                                                                           | 82  |
| Skeletal and Muscular Disorders | arthritis                      | arthritis of mammalia           | 7,12E-09 | ANXA1, CASP1, CCL5, CCR2, CD44, CIITA, CTSS, DEF6, FCGR2A, FCGR2B, HLA-DRB1, IL7, IL2RB, STAT4, TBX21, TNFSF13B                                                                                                                                                                                                                                                                                                                                                                                                                                                                                                                                                                                                                                                                             | 16  |
| Skeletal and Muscular Disorders | arthritis                      | arthritis of rodents            | 3,36E-08 | ANXA1, CASP1, CCL5, CCR2, CD44, CIITA, CTSS, DEF6, FCGR2A, FCGR2B, IL7, IL2RB, STAT4, TBX21, TNFSF13B                                                                                                                                                                                                                                                                                                                                                                                                                                                                                                                                                                                                                                                                                       | 15  |
| Skeletal and Muscular Disorders | arthritis                      | arthritis of mice               | 8,71E-08 | ANXA1, CASP1, CCR2, CD44, CIITA, CTSS, DEF6, FCGR2A, FCGR2B, IL7, IL2RB, STAT4, TBX21, TNFSF13B                                                                                                                                                                                                                                                                                                                                                                                                                                                                                                                                                                                                                                                                                             | 14  |
| Skeletal and Muscular Disorders | rheumatoid arthritis           | rheumatoid arthritis            | 1,24E-14 | ANAPC4, ANTXR1, ANXA1, ARHGDIB, ATM, BICD1, CCL5, CCR2, CCR5, CD28, CD44, CD53, CD74, CD3D, CDC7, CELF2, CIITA, CLU, CSF2RB, CXCL9, CXCL16, DEF6, EBF1, FCGR2A, FCGR2B, FLI1, FMNL2 (includes EG:114793), FUBP1, GABRP, GAS7, GBP2, GZMA, GZMB, HCK, HCLS1, HLA-C, HLA-DMB, HLA-DOA, HLA-DPA1, HLA-DPB1, HLA-DQB1, HLA-DRA, HLA-DRB1, HLA-DRB4, IKZF1, IL7, IL10RA, IL2RB, IL7R, ITGAL, ITGB2, LCP1, LHFP, LYZ, MRC1, MS4A7, MYH9, NCF4, NFATC2, NOD2, P2RY13, PID1, PTPN22, PTPRC, RNF213, ROBO1, RUNX1, STAT4, TAP1, TCF4, TNFSF13B, VIM                                                                                                                                                                                                                                                  | 72  |
| Skeletal and Muscular Disorders | skeletal and muscular disorder | skeletal and muscular disorder  | 5,16E-14 | ADAM12, ADCY7, ADRA2A, ANAPC4, ANTXR1, ANXA1, ARHGDIB, ATM, BASP1, BCL11B, BICD1, CASP1, CCL5, CCR2, CCR5, CD28, CD44, CD52, CD53, CD74, CD96, CD3D, CDC7, CELF2, CIITA, CLU, COL6A3, CP, CSF1R, CSF2RB, CTSS, CXCL9, CXCL16, CYTH4, DEF6, EBF1, ETV6, FCGR2A, FCGR2B, FLI1, FLNA, FMNL2 (includes EG:114793), FUBP1, GABRP, GAS7, GBP2, GF11, GZMA, GZMB, HCK, HCLS1, HLA-B, HLA-C, HLA-DMB, HLA-DOA, HLA-DPA1, HLA-DPB1, HLA-DQB1, HLA-DRA, HLA-DRB1, HLA-DRB4, HLA-F, IKZF1, IL7, IL10RA, IL2RB, IL7R, IRF8, ITGAL, ITGAM, ITGB2, ITGB6, KLRB1, LCK, LCP1, LHFP, LYZ, MAP4K1, MRC1, MS4A7, MYH9, NCF4, NFATC2, NLRP3, NOD2, NOTCH2, P2RY13, PID1, PLXDC1, PRKCB, PTPN22, PTPRC, RNF213, ROBO1, RUNX1, RUNX2, SH2B3, SH2D1A, STAT4, TAP1, TBX21, TCF4, TFPI2, THBS2, TNFSF13B, TSHZ2, VIM | 107 |
| Skeletal and Muscular Disorders | skeletal and muscular          | skeletal and muscular           | 1,12E-08 | ANXA1, CASP1, CCL5, CCR2, CD44, CIITA, CSF1R, CTSS, DEF6, FCGR2A, FCGR2B, IL7, IL2RB, ITGB2, RUNX2, SH2D1A, STAT4, TAP1, TBX21,                                                                                                                                                                                                                                                                                                                                                                                                                                                                                                                                                                                                                                                             | 20  |

|                                 |                                  |                                          |          |                                                                                                                                                                                                                                                                                                                                                                                                              |    |
|---------------------------------|----------------------------------|------------------------------------------|----------|--------------------------------------------------------------------------------------------------------------------------------------------------------------------------------------------------------------------------------------------------------------------------------------------------------------------------------------------------------------------------------------------------------------|----|
| Disorders                       | disorder                         | disorder of rodents                      |          | TNFSF13B                                                                                                                                                                                                                                                                                                                                                                                                     |    |
| Skeletal and Muscular Disorders | skeletal and muscular disorder   | skeletal and muscular disorder of mice   | 2,01E-08 | ANXA1, CASP1, CCR2, CD44, CIITA, CSF1R, CTSS, DEF6, FCGR2A, FCGR2B, IL7, IL2RB, ITGB2, RUNX2, SH2D1A, STAT4, TAP1, TBX21, TNFSF13B                                                                                                                                                                                                                                                                           | 19 |
| Skeletal and Muscular Disorders | systemic lupus erythematosus     | systemic lupus erythematosus             | 2,02E-10 | CD44, CLU, CXCL16, FCGR2A, FCGR2B, HLA-DRA, IL7R, ITGAM, PTPN22, PTPRC, SH2B3, SH2D1A, STAT4, TAP1, TNFSF13B                                                                                                                                                                                                                                                                                                 | 15 |
| Skeletal and Muscular Disorders | experimentally-induced arthritis | experimentally-induced arthritis of mice | 1,96E-06 | ANXA1, CCR2, CD44, CTSS, FCGR2A, FCGR2B, IL2RB, STAT4, TBX21, TNFSF13B                                                                                                                                                                                                                                                                                                                                       | 10 |
| Skeletal and Muscular Disorders | experimentally-induced arthritis | experimentally-induced arthritis         | 4,07E-06 | ANXA1, CCR2, CCR5, CD44, CTSS, FCGR2A, FCGR2B, IL2RB, STAT4, TBX21, TNFSF13B                                                                                                                                                                                                                                                                                                                                 | 11 |
| Skeletal and Muscular Disorders | multiple sclerosis               | multiple sclerosis                       | 8,26E-06 | ADRA2A, CASP1, CD52, CIITA, GFI1, HLA-DMB, HLA-DQB1, HLA-DRA, HLA-DRB1, HLA-F, IL7, IL7R, KLRB1, PTPRC                                                                                                                                                                                                                                                                                                       | 14 |
| Skeletal and Muscular Disorders | collagen-induced arthritis       | collagen-induced arthritis of mice       | 1,21E-05 | ANXA1, CCR2, CD44, CTSS, IL2RB, STAT4, TBX21, TNFSF13B                                                                                                                                                                                                                                                                                                                                                       | 8  |
| Hematological Disease           | hematological disorder           | hematological disorder                   | 2,44E-16 | ADRA2A, AHR, ANTXR1, ATM, BCL11A, CASP1, CCL5, CCND2, CCR2, CCR5, CD2, CD28, CD47, CD52, CD74, CD247, CD3D, CLU, CSF1R, CSF2RB, CTSS, CXCL9, DEF6, ETS1, ETV6, FCGR2A, FCGR2B, FUBP1, FYB, GFI1, HCLS1, IKZF1, IL7, IL2RB, IL2RG, IL7R, IRF1, IRF4, IRF8, ITGB2, ITGB6, ITK, JAK3, KLRK1, LCK, MMP7, MYB (includes EG:4602), MYH9, PRF1, PRKCB, RAC2, RASGRP4, RUNX1, RUNX2, SELL, STAT4, TGFB2, THBS2, VAV1 | 59 |
| Hematological Disease           | hematological disorder           | hematological disorder of mice           | 3,53E-12 | CASP1, CCND2, CD28, CD47, DEF6, ETS1, ETV6, FCGR2A, FCGR2B, GFI1, HCLS1, IKZF1, IL7, IL2RB, IL2RG, IL7R, IRF8, ITGB2, JAK3, MYH9, PRF1, RAC2, RUNX1, STAT4, TGFB2, THBS2, VAV1                                                                                                                                                                                                                               | 27 |
| Hematological Disease           | hematological disorder           | hematological disorder of mammalia       | 3,65E-12 | CASP1, CCND2, CD28, CD47, CXCL9, DEF6, ETS1, ETV6, FCGR2A, FCGR2B, GFI1, HCLS1, IKZF1, IL7, IL2RB, IL2RG, IL7R, IRF8, ITGB2, JAK3, MYH9, PRF1, RAC2, RUNX1, STAT4, TGFB2, THBS2, VAV1                                                                                                                                                                                                                        | 28 |
| Hematological Disease           | hematologic cancer               | hematologic cancer                       | 6,58E-08 | ATM, CD2, CD52, CD74, CD247, CD3D, CSF1R, CSF2RB, ETV6, IKZF1, IL7, IL2RB, IL2RG, IRF4, ITGB2, JAK3, KLRK1, LCK, MYB (includes EG:4602), PRKCB, RUNX1, RUNX2, TGFB2                                                                                                                                                                                                                                          | 23 |
| Hematological Disease           | lymphocytic leukemia             | lymphocytic leukemia                     | 3,73E-07 | ATM, CD52, CD74, CD247, CD3D, CSF2RB, ETV6, IKZF1, IL2RB, IL2RG, IRF4, ITGB2, LCK, PRKCB, RUNX1                                                                                                                                                                                                                                                                                                              | 15 |
| Hematological Disease           | infection                        | infection of leukocytes                  | 1,81E-06 | CASP1, CCL5, CCR2, CCR5, CD209, IRF1, ITGAM                                                                                                                                                                                                                                                                                                                                                                  | 7  |
| Hematological Disease           | leukemia                         | leukemia                                 | 2,95E-06 | ATM, CD2, CD52, CD74, CD247, CD3D, CSF1R, CSF2RB, ETV6, IKZF1, IL2RB, IL2RG, IRF4, ITGB2, JAK3, LCK, PRKCB, RUNX1, TGFB2                                                                                                                                                                                                                                                                                     | 19 |
| Hematological Disease           | eosinophilia                     | eosinophilia                             | 3,76E-06 | CD247, CTSS, CXCL9, DEF6, IL2RG, IRF8, ITGB6, ITK, LCK, MYH9, PRF1                                                                                                                                                                                                                                                                                                                                           | 11 |
| Hematological Disease           | autoimmune hemolytic anemia      | autoimmune hemolytic anemia of mice      | 7,05E-06 | CD28, CD47, FCGR2A, IL7R                                                                                                                                                                                                                                                                                                                                                                                     | 4  |
| Organismal Survival             | survival                         | survival of organism                     | 4,19E-15 | ADRA2A, AHR, ANTXR2, ATM, BCL2A1, CCND2, CCR2, CCR5, CD2, CD44, CD48, CD74, CDC7, CXCL9, CYBB, FCGR2B, FLI1, HLA-DRA, IKZF1, IL7, IL7R, ITGAL, ITGAM, ITGB6, ITK, LTB4R, LYZ, MYB (includes EG:4602), NLRP3, NRP1, PRF1, PRKCB, PTPRC, STAT4, TAP1, THBS2                                                                                                                                                    | 36 |
| Organismal Survival             | survival                         | survival of mammalia                     | 3,94E-13 | ADRA2A, ANTXR2, ATM, BCL2A1, CCND2, CCR2, CCR5, CD2, CD44, CD74, CDC7, CXCL9, CYBB, FCGR2B, FLI1, HLA-DRA, IKZF1, IL7, IL7R, ITGAL, ITGAM, ITGB6, ITK, LTB4R, MYB (includes EG:4602), NLRP3, NRP1, PRF1, PRKCB, PTPRC, STAT4, TAP1, THBS2                                                                                                                                                                    | 33 |
| Organismal Survival             | survival                         | survival of rodents                      | 1,57E-11 | ADRA2A, ANTXR2, ATM, BCL2A1, CCND2, CCR2, CCR5, CD2, CD74, CDC7, CXCL9, CYBB, FCGR2B, FLI1, HLA-DRA, IKZF1, IL7, IL7R, ITGAL, ITGAM, ITK, LTB4R, NLRP3, NRP1, PRF1, PRKCB, PTPRC, STAT4, TAP1, THBS2                                                                                                                                                                                                         | 30 |
| Organismal Survival             | survival                         | survival of                              | 4,87E-   | ADRA2A, ATM, BCL2A1, CCND2, CCR2, CCR5, CD2, CD74, CDC7, CXCL9,                                                                                                                                                                                                                                                                                                                                              | 29 |

|                     |                                   |                                   |          |                                                                                                                                                                                                                                                                                                                             |    |
|---------------------|-----------------------------------|-----------------------------------|----------|-----------------------------------------------------------------------------------------------------------------------------------------------------------------------------------------------------------------------------------------------------------------------------------------------------------------------------|----|
| Survival            |                                   | mice                              | 11       | CYBB, FCGR2B, FLI1, HLA-DRA, IKZF1, IL7, IL7R, ITGAL, ITGAM, ITK, LTB4R, NLRP3, NRP1, PRF1, PRKCB, PTPRC, STAT4, TAP1, THBS2                                                                                                                                                                                                |    |
| Organismal Survival | death                             | death of mice                     | 1,83E-10 | ADAM12, ADAM19, ADRA2A, AHR, ANTXR2, ANXA1, ATM, BCL2A1, CASP1, CCND2, CCR2, CCR5, CD28, CD44, CD209, CD8A, CDC7, CXCL9, CYBB, ETS1, ETV6, FCGR2B, FLI1, GFI1, GZMA, GZMB, IL2RB, IRF8, ITGAM, LCP2, LYZ, MYB (includes EG:4602), NOD2, NOTCH2, NR2F2, NRP1, PRF1, PTPRC, ROBO1, RUNX2, STAT4, TBX21, THBS2, TNFSF13B, VAV1 | 45 |
| Respiratory Disease | respiratory disorder              | respiratory disorder              | 8,97E-15 | ADRA2A, ANTXR1, ARL4C, ATM, CASP1, CCL5, CCR2, CCR5, CCR7, CD44, CD247, CD8A, CIITA, CLU, CSF2RB, CTSS, CYBB, GZMB, HCK, HLA-DRA, HLA-DRB1, IL7, IL10RA, IL2RB, IRF8, ITGAM, ITGB2, ITGB6, ITK, LCK, LEF1, LTB4R, LYZ, MMP7, MYH9, NOD2, PTPRC, RASGRP4, SH2B3, SLC2A3, STAT4, TBX21, TGFB2, TIMP2                          | 44 |
| Respiratory Disease | respiratory disorder              | respiratory disorder of mice      | 1,80E-08 | CCL5, CCR2, CCR5, CD44, CIITA, CTSS, CYBB, GZMB, HLA-DRA, IL2RB, ITGB6, ITK, LTB4R, STAT4, TBX21, TGFB2                                                                                                                                                                                                                     | 16 |
| Respiratory Disease | severe acute respiratory syndrome | severe acute respiratory syndrome | 6,07E-11 | ARL4C, CCR7, CD247, CLU, CSF2RB, IL10RA, IRF8, ITGAM, ITK, LCK, LEF1, LTB4R, SH2B3, SLC2A3, STAT4, TIMP2                                                                                                                                                                                                                    | 16 |
| Respiratory Disease | disease                           | disease of lung                   | 2,90E-07 | AHR, AKAP12, CCR2, CD8A, HCK, IRF1, ITGB6, ITK, LYZ, MMP7, PRF1, TGFB2, TIMP2                                                                                                                                                                                                                                               | 13 |
| Cell Morphology     | shape change                      | shape change of blood cells       | 3,13E-14 | ADRA2A, CCL5, CCR2, CD44, CD47, CD247, CNN2, FCGR2A, GZMB, HCK, ITGAL, ITGAM, ITGB2, MYH9, SELL, WIPF1                                                                                                                                                                                                                      | 16 |
| Cell Morphology     | shape change                      | shape change of leukocytes        | 1,08E-11 | CCL5, CCR2, CD44, CD47, CD247, CNN2, HCK, ITGAL, ITGAM, ITGB2, MYH9, SELL, WIPF1                                                                                                                                                                                                                                            | 13 |
| Cell Morphology     | shape change                      | shape change of eukaryotic cells  | 1,54E-11 | ADRA2A, ANTXR1, BASP1, CCL5, CCR2, CD44, CD47, CD247, CDC42SE1, CNN2, CSF1R, FCGR2A, GZMB, HCK, ITGAL, ITGAM, ITGB2, KLRK1, MARCKS, MYH9, PARVG, ROBO1, RUNX2, SELL, THBS2, TPM1, WIPF1                                                                                                                                     | 27 |
| Cell Morphology     | shape change                      | shape change of normal cells      | 1,95E-11 | ADRA2A, BASP1, CCL5, CCR2, CD44, CD47, CD247, CNN2, FCGR2A, GZMB, HCK, ITGAL, ITGAM, ITGB2, MYH9, ROBO1, RUNX2, SELL, THBS2, WIPF1                                                                                                                                                                                          | 20 |
| Cell Morphology     | shape change                      | shape change                      | 2,63E-10 | ADRA2A, ANTXR1, BASP1, CCL5, CCR2, CCR5, CD44, CD47, CD247, CDC42SE1, CNN2, CSF1R, EMB, FCGR2A, GAS7, GZMB, HCK, ITGAL, ITGAM, ITGB2, ITGB6, KLRK1, MARCKS, MYH9, NRP1, PARVG, ROBO1, RUNX2, SELL, THBS2, TPM1, WIPF1                                                                                                       | 32 |
| Cell Morphology     | shape change                      | shape change of granulocytes      | 1,95E-06 | CCL5, CCR2, HCK, ITGAM, ITGB2, SELL                                                                                                                                                                                                                                                                                         | 6  |
| Cell Morphology     | morphogenesis                     | morphogenesis of cells            | 2,62E-10 | ADRA2A, ANTXR1, BASP1, CCL5, CCR2, CD44, CD47, CD247, CDC42SE1, CNN2, CSF1R, FCGR2A, GZMB, HCK, IL7R, ITGAL, ITGAM, ITGB2, KLRK1, MARCKS, MYH9, PARVG, RAC2, ROBO1, RUNX2, SELL, THBS2, TIMP2, TPM1, WIPF1                                                                                                                  | 30 |
| Cell Morphology     | polarization                      | polarization of eukaryotic cells  | 1,63E-09 | CCL5, CCR5, CD28, CD47, CD74, CXCL9, IRF4, ITGB2, LCK, RASSF5, STAT4, TBX21, VAV1, WIPF1                                                                                                                                                                                                                                    | 14 |
| Cell Morphology     | polarization                      | polarization of blood cells       | 2,19E-09 | CCL5, CD28, CD74, CXCL9, IRF4, ITGB2, LCK, RASSF5, STAT4, TBX21, VAV1, WIPF1                                                                                                                                                                                                                                                | 12 |
| Cell Morphology     | polarization                      | polarization of lymphocytes       | 1,72E-08 | CD28, CD74, IRF4, ITGB2, LCK, RASSF5, STAT4, TBX21, VAV1, WIPF1                                                                                                                                                                                                                                                             | 10 |
| Cell Morphology     | polarization                      | polarization of leukocytes        | 2,00E-08 | CCL5, CD28, CD74, IRF4, ITGB2, LCK, RASSF5, STAT4, TBX21, VAV1, WIPF1                                                                                                                                                                                                                                                       | 11 |
| Cell Morphology     | polarization                      | polarization of T lymphocytes     | 4,95E-08 | CD28, CD74, IRF4, LCK, RASSF5, STAT4, TBX21, VAV1, WIPF1                                                                                                                                                                                                                                                                    | 9  |
| Cell Morphology     | cell spreading                    | cell spreading of blood cells     | 1,89E-09 | CD44, CD47, CD247, CNN2, FCGR2A, GZMB, HCK, ITGAL, ITGAM, ITGB2                                                                                                                                                                                                                                                             | 10 |
| Cell                | cell                              | cell                              | 4,45E-   | ANTXR1, CCL5, CCR5, CD44, CD47, CD247, CNN2, FCGR2A, GZMB, HCK,                                                                                                                                                                                                                                                             | 17 |

|                 |                |                                    |          |                                                                                                                                                                                                                                                                                                                                                                                                                                                                                                                                                                                                                                                                                                                                                                                                                      |     |
|-----------------|----------------|------------------------------------|----------|----------------------------------------------------------------------------------------------------------------------------------------------------------------------------------------------------------------------------------------------------------------------------------------------------------------------------------------------------------------------------------------------------------------------------------------------------------------------------------------------------------------------------------------------------------------------------------------------------------------------------------------------------------------------------------------------------------------------------------------------------------------------------------------------------------------------|-----|
| Morphology      | spreading      | spreading                          | 08       | ITGAL, ITGAM, ITGB2, KLRK1, PARVG, THBS2, TPM1                                                                                                                                                                                                                                                                                                                                                                                                                                                                                                                                                                                                                                                                                                                                                                       |     |
| Cell Morphology | cell spreading | cell spreading of leukocytes       | 1,34E-07 | CD44, CD47, CD247, CNN2, HCK, ITGAL, ITGAM, ITGB2                                                                                                                                                                                                                                                                                                                                                                                                                                                                                                                                                                                                                                                                                                                                                                    | 8   |
| Cell Morphology | cell spreading | cell spreading of normal cells     | 1,42E-07 | CD44, CD47, CD247, CNN2, FCGR2A, GZMB, HCK, ITGAL, ITGAM, ITGB2, THBS2                                                                                                                                                                                                                                                                                                                                                                                                                                                                                                                                                                                                                                                                                                                                               | 11  |
| Cell Morphology | cell spreading | cell spreading of eukaryotic cells | 2,00E-07 | ANTXR1, CD44, CD47, CD247, CNN2, FCGR2A, GZMB, HCK, ITGAL, ITGAM, ITGB2, KLRK1, PARVG, THBS2, TPM1                                                                                                                                                                                                                                                                                                                                                                                                                                                                                                                                                                                                                                                                                                                   | 15  |
| Cell Morphology | reorganization | reorganization of cytoskeleton     | 5,81E-07 | ANTXR1, CD44, CD47, CXCL9, FLNA, ITK, LCK, MYH9, PLEK, TRIO, VAV1                                                                                                                                                                                                                                                                                                                                                                                                                                                                                                                                                                                                                                                                                                                                                    | 11  |
| Cancer          | tumorigenesis  | tumorigenesis                      | 1,03E-13 | ACSL5, ADAM12, ADRA2A, AHR, AKAP12, ANTXR1, ANTXR2, ANXA1, ARHGDIB, ARL4C, ATM, BCL11A, C1ORF63, CASP1, CCL5, CCND2, CCR2, CCR5, CCR7, CD2, CD28, CD44, CD47, CD48, CD52, CD74, CD247, CD3D, CD8A, CDC7, CLDN11, CLU, COL4A4 (includes EG:1286), COL6A3, CP, CSF1R, CSF2RB, CST7, CTSS, CXCL9, CXCL16, CYTIP, DGKA, ETS1, ETV6, FCGR2A, FLI1, FLNA, FUBP1, GABRP, GBP2, GF11, GFRA1, GPR65, GZMA, GZMB, GZMK, HCLS1, HLA-B, HLA-DOA, HLA-DRA, HLA-DRB4, IKZF1, IL7, IL2RB, IL2RG, IL7R, IRF1, IRF4, IRF8, ITGB2, ITGB6, ITK, JAK3, KCNK6, KLRK1, LCK, LEF1, LTB4R, LYZ, MAP4K1, MARCKS, MMP7, MYB (includes EG:4602), NFATC2, NOTCH2, NRP1, PLXDC1, PRF1, PRKCB, PTPRC, PTPRE, RASGRP4, RASSF5, ROBO1, RUNX1, RUNX2, SELL, SERPINB9, SLC2A3, TCF4, TFPI2, TGFB2, THBS2, TIMP2, TNFSF13B, TPBG, TPM1, TRIO, VAV1, VIM | 111 |
| Cancer          | tumorigenesis  | tumorigenesis of mammalia          | 3,77E-07 | AHR, AKAP12, ATM, CASP1, CCND2, CTSS, CYTIP, ETV6, GF11, IL7, IL2RB, IRF1, LEF1, MMP7, RUNX1, RUNX2, TGFB2                                                                                                                                                                                                                                                                                                                                                                                                                                                                                                                                                                                                                                                                                                           | 17  |
| Cancer          | tumorigenesis  | tumorigenesis of mice              | 2,48E-06 | AHR, AKAP12, ATM, CASP1, CYTIP, ETV6, GF11, IL7, IL2RB, IRF1, LEF1, MMP7, RUNX1, RUNX2, TGFB2                                                                                                                                                                                                                                                                                                                                                                                                                                                                                                                                                                                                                                                                                                                        | 15  |
| Cancer          | neoplasia      | neoplasia                          | 5,84E-13 | ACSL5, ADAM12, ADRA2A, AHR, AKAP12, ANTXR1, ANTXR2, ANXA1, ARHGDIB, ARL4C, ATM, BCL11A, C1ORF63, CASP1, CCL5, CCND2, CCR2, CCR5, CCR7, CD2, CD28, CD44, CD47, CD48, CD52, CD74, CD247, CD3D, CD8A, CDC7, CLDN11, CLU, COL4A4 (includes EG:1286), COL6A3, CP, CSF1R, CSF2RB, CST7, CTSS, CXCL9, CXCL16, CYTIP, DGKA, ETS1, ETV6, FCGR2A, FLI1, FLNA, FUBP1, GABRP, GBP2, GFRA1, GPR65, GZMA, GZMB, GZMK, HCLS1, HLA-B, HLA-DOA, HLA-DRA, HLA-DRB4, IKZF1, IL7, IL2RB, IL2RG, IL7R, IRF1, IRF4, ITGB2, ITGB6, ITK, JAK3, KCNK6, KLRK1, LCK, LEF1, LYZ, MAP4K1, MARCKS, MMP7, MYB (includes EG:4602), NFATC2, NOTCH2, NRP1, PLXDC1, PRF1, PRKCB, PTPRC, PTPRE, RASGRP4, RASSF5, ROBO1, RUNX1, RUNX2, SELL, SERPINB9, SLC2A3, TCF4, TFPI2, TGFB2, TIMP2, TPBG, TPM1, VIM                                                 | 104 |
| Cancer          | cancer         | cancer                             | 6,67E-13 | ACSL5, ADAM12, ADRA2A, AHR, AKAP12, ANTXR1, ANTXR2, ANXA1, ARHGDIB, ARL4C, ATM, BCL11A, C1ORF63, CASP1, CCL5, CCND2, CCR2, CCR5, CCR7, CD2, CD28, CD44, CD47, CD48, CD52, CD74, CD247, CD3D, CD8A, CDC7, CLDN11, CLU, COL4A4 (includes EG:1286), COL6A3, CP, CSF1R, CSF2RB, CST7, CTSS, CXCL9, CXCL16, CYTIP, DGKA, ETS1, ETV6, FCGR2A, FLI1, FLNA, FUBP1, GABRP, GBP2, GFRA1, GPR65, GZMA, GZMB, GZMK, HCLS1, HLA-B, HLA-DOA, HLA-DRA, HLA-DRB4, IKZF1, IL7, IL2RB, IL2RG, IL7R, IRF1, IRF4, ITGB2, ITGB6, ITK, JAK3, KCNK6, KLRK1, LCK, LEF1, LYZ, MAP4K1, MARCKS, MMP7, MYB (includes EG:4602), NOTCH2, NRP1, PLXDC1, PRF1, PRKCB, PTPRC, PTPRE, RASGRP4, RASSF5, ROBO1, RUNX1, RUNX2, SELL, SERPINB9, SLC2A3, TCF4, TFPI2, TGFB2, TIMP2, TPBG, TPM1, VIM                                                         | 103 |
| Cancer          | tumor          | tumor                              | 1,08E-12 | ADAM12, ADRA2A, AHR, AKAP12, ANTXR1, ANTXR2, ANXA1, ARHGDIB, ARL4C, ATM, BCL11A, CASP1, CCND2, CCR2, CCR5, CCR7, CD2, CD28, CD44, CD47, CD48, CD52, CD74, CD3D, CD8A, CDC7, CLDN11, CLU, COL6A3, CP, CSF1R, CSF2RB, CST7, CTSS, CXCL9, CXCL16, ETS1, ETV6, FCGR2A, FLI1, FLNA, GABRP, GBP2, GFRA1, GPR65, GZMB, GZMK, HLA-B, HLA-DRA, HLA-DRB4, IKZF1, IL2RB, IL2RG, IRF1, IRF8, ITGB6, KCNK6, LCK, LEF1, LTB4R, LYZ, MAP4K1, MARCKS, MMP7, NRP1, PLXDC1, PRF1, PRKCB, PTPRC, PTPRE, RASSF5, RUNX1, RUNX2, SELL, SERPINB9, TFPI2, TGFB2, THBS2, TIMP2, TNFSF13B, TPBG, TPM1, VAV1, VIM                                                                                                                                                                                                                               | 84  |



|                    |                                                  |                                                  |          |                                                                                                                                                                                                                                                                                                                                                                                                                                              |    |
|--------------------|--------------------------------------------------|--------------------------------------------------|----------|----------------------------------------------------------------------------------------------------------------------------------------------------------------------------------------------------------------------------------------------------------------------------------------------------------------------------------------------------------------------------------------------------------------------------------------------|----|
| Cancer             | malignant tumor                                  | malignant tumor                                  | 1,23E-09 | ADAM12, AHR, ANTXR1, ANTXR2, ANXA1, ARHGDIB, ARL4C, ATM, BCL11A, CASP1, CCR2, CCR5, CCR7, CD2, CD44, CD48, CD52, CD74, CD3D, CD8A, CLDN11, CLU, COL6A3, CP, CSF1R, CSF2RB, CST7, CTSS, CXCL9, ETS1, ETV6, FCGR2A, FLI1, FLNA, GABRP, GBP2, GFRA1, GPR65, GZMB, GZMK, HLA-DRA, HLA-DRB4, IKZF1, IL2RB, IL2RG, IRF1, KCNK6, LCK, LEF1, LYZ, MAP4K1, MMP7, PLXDC1, PRF1, PRKCB, PTPRC, PTPRE, RASSF5, RUNX2, SERPINB9, TFPI2, TGFB2, TIMP2, VIM | 64 |
| Cancer             | prostate cancer                                  | prostate cancer                                  | 1,87E-08 | ANTXR1, ANTXR2, ARHGDIB, CCL5, CCR2, CCR7, CD44, CD52, CD74, CLDN11, CLU, CSF1R, CSF2RB, CYTIP, FLNA, GBP2, GZMA, HLA-DRB4, IL7R, IRF1, ITK, LCK, LEF1, LYZ, MMP7, PRKCB, PTPRC, RUNX1, RUNX2, TCF4                                                                                                                                                                                                                                          | 30 |
| Cancer             | hematologic cancer                               | hematologic cancer                               | 6,58E-08 | ATM, CD2, CD52, CD74, CD247, CD3D, CSF1R, CSF2RB, ETV6, IKZF1, IL7, IL2RB, IL2RG, IRF4, ITGB2, JAK3, KLRK1, LCK, MYB (includes EG:4602), PRKCB, RUNX1, RUNX2, TGFB2                                                                                                                                                                                                                                                                          | 23 |
| Cancer             | lymphomagenesis                                  | lymphomagenesis                                  | 2,18E-07 | ATM, CD44, CD52, CSF2RB, CXCL9, ETV6, FCGR2A, GFI1, IKZF1, IL7, IL2RB, IL2RG, IRF1, LCK, MAP4K1, PRF1, PRKCB, PTPRC                                                                                                                                                                                                                                                                                                                          | 18 |
| Cancer             | lymphocytic leukemia                             | lymphocytic leukemia                             | 3,73E-07 | ATM, CD52, CD74, CD247, CD3D, CSF2RB, ETV6, IKZF1, IL2RB, IL2RG, IRF4, ITGB2, LCK, PRKCB, RUNX1                                                                                                                                                                                                                                                                                                                                              | 15 |
| Cancer             | growth                                           | growth of tumor                                  | 7,61E-07 | AHR, ANTXR1, CASP1, CCR2, CD44, CTSS, IRF1, IRF8, ITGB6, NRP1, RUNX1, RUNX2, SELL, TIMP2, TPM1                                                                                                                                                                                                                                                                                                                                               | 15 |
| Cancer             | developmental process                            | developmental process of tumor                   | 9,96E-07 | AHR, ANTXR1, ATM, CASP1, CCR2, CD44, CTSS, IRF1, IRF8, ITGB6, LCK, NRP1, PTPRC, RUNX1, RUNX2, SELL, TIMP2, TPM1                                                                                                                                                                                                                                                                                                                              | 18 |
| Cancer             | carcinoma                                        | carcinoma                                        | 2,11E-06 | ADAM12, AHR, ANTXR1, ANTXR2, ANXA1, ARHGDIB, ARL4C, BCL11A, CASP1, CCR2, CCR5, CCR7, CD44, CD48, CD74, CLDN11, CLU, COL6A3, CP, CSF1R, CST7, CTSS, ETS1, FLNA, GABRP, GBP2, GFRA1, GPR65, HLA-DRA, HLA-DRB4, IL2RB, IL2RG, IRF1, KCNK6, LCK, LEF1, LYZ, MMP7, PLXDC1, PRKCB, PTPRC, PTPRE, RASSF5, RUNX2, SERPINB9, TFPI2, TGFB2, TIMP2, VIM                                                                                                 | 49 |
| Cancer             | papillary carcinoma                              | papillary carcinoma                              | 2,87E-06 | CD44, CD48, CST7, ETS1, PTPRC, RUNX2, TGFB2, TIMP2, VIM                                                                                                                                                                                                                                                                                                                                                                                      | 9  |
| Cancer             | leukemia                                         | leukemia                                         | 2,95E-06 | ATM, CD2, CD52, CD74, CD247, CD3D, CSF1R, CSF2RB, ETV6, IKZF1, IL2RB, IL2RG, IRF4, ITGB2, JAK3, LCK, PRKCB, RUNX1, TGFB2                                                                                                                                                                                                                                                                                                                     | 19 |
| Cancer             | endocrine gland tumor                            | endocrine gland tumor                            | 3,59E-06 | AHR, CD48, CD74, CSF1R, CST7, CTSS, ETS1, GABRP, HLA-DRA, MMP7, PTPRC, RUNX2, TGFB2, VIM                                                                                                                                                                                                                                                                                                                                                     | 14 |
| Cancer             | head and neck tumor                              | head and neck tumor                              | 5,20E-06 | ANXA1, ATM, CCR5, CCR7, CD44, CD48, CLU, COL6A3, CSF1R, CST7, CXCL16, ETS1, LCK, MARCKS, PRKCB, PTPRC, RUNX2, TGFB2, VIM                                                                                                                                                                                                                                                                                                                     | 19 |
| Cancer             | lymphoma                                         | lymphoma                                         | 7,45E-06 | ATM, CD44, CD52, CSF2RB, CXCL9, ETV6, FCGR2A, IKZF1, IL2RB, IL2RG, LCK, MAP4K1, PRF1, PRKCB, PTPRC                                                                                                                                                                                                                                                                                                                                           | 15 |
| Cancer             | head and neck cancer                             | head and neck cancer                             | 1,21E-05 | ADAM12, ANXA1, ATM, CCR5, CCR7, CD44, CD48, CLU, COL6A3, CSF1R, CSF2RB, CST7, CXCL16, ETS1, LCK, MARCKS, PRKCB, PTPRC, RUNX2, TGFB2, VIM                                                                                                                                                                                                                                                                                                     | 21 |
| Cancer             | papillary thyroid cancer                         | papillary thyroid cancer                         | 1,50E-05 | CD48, CSF1R, CST7, ETS1, PTPRC, RUNX2, TGFB2, VIM                                                                                                                                                                                                                                                                                                                                                                                            | 8  |
| Cell Signaling     | tyrosine phosphorylation                         | tyrosine phosphorylation of protein              | 1,29E-13 | CCL5, CD2, CD28, CD44, CD47, CD48, CD247, CD8A, CSF1R, ETV6, FCGR2A, FCGR2B, HCK, IL7, ITGAM, ITGB2, JAK3, LCK, NFAM1, PTPN22, PTPRC, SELL, SH2D1A                                                                                                                                                                                                                                                                                           | 23 |
| Cell Signaling     | mobilization                                     | mobilization of calcium                          | 6,48E-13 | ANXA1, CCL5, CCR2, CCR5, CCR7, CD2, CD28, CD44, CD247, CD3D, CXCL9, CXCL16, DEF6, FCGR2A, FCGR2B, ITGB2, ITK, KLRK1, LCK, LCP2, LTB4R, NFATC2, PTPRC, RAC2, SELL, SLA, TRD@, VAV1, WIPF1                                                                                                                                                                                                                                                     | 29 |
| Cell Signaling     | mobilization                                     | mobilization of Ca <sup>2+</sup>                 | 3,81E-06 | CCL5, CD44, CD247, CD3D, CXCL9, FCGR2A, FCGR2B, ITGB2, KLRK1, LCK, SELL, VAV1                                                                                                                                                                                                                                                                                                                                                                | 12 |
| Cell Signaling     | flux                                             | flux of calcium                                  | 3,95E-10 | ANXA1, CCL5, CCR2, CCR5, CD2, CD28, CD247, CD300A, CD8A, FCGR2A, FCGR2B, HCK, ITGB2, ITK, LCP2, LTB4R, PRF1, PRKCB, RAC2, TRPA1, VAV1                                                                                                                                                                                                                                                                                                        | 21 |
| Cell Signaling     | cell surface receptor linked signal transduction | cell surface receptor linked signal transduction | 4,10E-09 | ANXA1, CCR2, CD2, CD28, CD247, CD8A, FCGR2A, FCGR2B, GFRA1, IL2RB, IL7R, ITGAL, JAK3, KLRB1, LCK, LCP2, PTPRC, PTPRE, RUNX2, STAT4, TGFB2, TRIO                                                                                                                                                                                                                                                                                              | 22 |
| Post-Translational | tyrosine phosphorylation                         | tyrosine phosphorylation of                      | 1,29E-13 | CCL5, CD2, CD28, CD44, CD47, CD48, CD247, CD8A, CSF1R, ETV6, FCGR2A, FCGR2B, HCK, IL7, ITGAM, ITGB2, JAK3, LCK, NFAM1, PTPN22, PTPRC, SELL, SH2D1A                                                                                                                                                                                                                                                                                           | 23 |

|                                 |                                   |                                   |          |                                                                                                                                                                                                                                                                                                                                                                                                                                      |    |
|---------------------------------|-----------------------------------|-----------------------------------|----------|--------------------------------------------------------------------------------------------------------------------------------------------------------------------------------------------------------------------------------------------------------------------------------------------------------------------------------------------------------------------------------------------------------------------------------------|----|
| Modification                    |                                   | protein                           |          |                                                                                                                                                                                                                                                                                                                                                                                                                                      |    |
| Post-Translational Modification | phosphorylation                   | phosphorylation of protein        | 3,05E-13 | AHR, ATM, CCL5, CCND2, CD2, CD28, CD44, CD47, CD48, CD247, CD8A, CSF1R, ETV6, FCGR2A, FCGR2B, HCK, IL7, ITGAM, ITGB2, JAK3, LCK, NFAM1, PTPN22, PTPRC, SELL, SH2D1A, TGFBR2                                                                                                                                                                                                                                                          | 27 |
| Post-Translational Modification | cleavage                          | cleavage of protein               | 1,67E-05 | ADAM19, CASP1, GZMA, GZMB, MMP7, MYH9, PTPRC, TIMP2                                                                                                                                                                                                                                                                                                                                                                                  | 8  |
| Molecular Transport             | mobilization                      | mobilization of calcium           | 6,48E-13 | ANXA1, CCL5, CCR2, CCR5, CCR7, CD2, CD28, CD44, CD247, CD3D, CXCL9, CXCL16, DEF6, FCGR2A, FCGR2B, ITGB2, ITK, KLRK1, LCK, LCP2, LTB4R, NFATC2, PTPRC, RAC2, SELL, SLA, TRD@, VAV1, WIPF1                                                                                                                                                                                                                                             | 29 |
| Molecular Transport             | mobilization                      | mobilization of Ca <sup>2+</sup>  | 3,81E-06 | CCL5, CD44, CD247, CD3D, CXCL9, FCGR2A, FCGR2B, ITGB2, KLRK1, LCK, SELL, VAV1                                                                                                                                                                                                                                                                                                                                                        | 12 |
| Molecular Transport             | flux                              | flux of calcium                   | 3,95E-10 | ANXA1, CCL5, CCR2, CCR5, CD2, CD28, CD247, CD300A, CD8A, FCGR2A, FCGR2B, HCK, ITGB2, ITK, LCP2, LTB4R, PRF1, PRKCB, RAC2, TRPA1, VAV1                                                                                                                                                                                                                                                                                                | 21 |
| Vitamin and Mineral Metabolism  | mobilization                      | mobilization of calcium           | 6,48E-13 | ANXA1, CCL5, CCR2, CCR5, CCR7, CD2, CD28, CD44, CD247, CD3D, CXCL9, CXCL16, DEF6, FCGR2A, FCGR2B, ITGB2, ITK, KLRK1, LCK, LCP2, LTB4R, NFATC2, PTPRC, RAC2, SELL, SLA, TRD@, VAV1, WIPF1                                                                                                                                                                                                                                             | 29 |
| Vitamin and Mineral Metabolism  | mobilization                      | mobilization of Ca <sup>2+</sup>  | 3,81E-06 | CCL5, CD44, CD247, CD3D, CXCL9, FCGR2A, FCGR2B, ITGB2, KLRK1, LCK, SELL, VAV1                                                                                                                                                                                                                                                                                                                                                        | 12 |
| Vitamin and Mineral Metabolism  | flux                              | flux of calcium                   | 3,95E-10 | ANXA1, CCL5, CCR2, CCR5, CD2, CD28, CD247, CD300A, CD8A, FCGR2A, FCGR2B, HCK, ITGB2, ITK, LCP2, LTB4R, PRF1, PRKCB, RAC2, TRPA1, VAV1                                                                                                                                                                                                                                                                                                | 21 |
| Humoral Immune Response         | proliferation                     | proliferation of B lymphocytes    | 1,01E-11 | CCND2, CD44, CD74, CD8A, FCGR2B, HCK, IL7, IL2RG, IL7R, IRF4, IRF8, LEF1, NFATC2, PRKCB, PTPRC, SASH3, SH2B3, SLAMF7, TNFSF13B, VAV1, WIPF1                                                                                                                                                                                                                                                                                          | 21 |
| Humoral Immune Response         | quantity                          | quantity of B lymphocytes         | 2,44E-11 | AHR, BCL2A1, CCR7, CD28, FCGR2A, IL7, IL2RG, IL7R, ITGB2, JAK3, NFATC2, NOTCH2, RAC2, SH2B3, SLA, TCF4, TGFBR2, TNFSF13B, VAV1                                                                                                                                                                                                                                                                                                       | 19 |
| Humoral Immune Response         | quantity                          | quantity of pre-B lymphocytes     | 1,23E-06 | CD28, IL7, IL2RG, IL7R, SH2B3, TCF4, TNFSF13B                                                                                                                                                                                                                                                                                                                                                                                        | 7  |
| Humoral Immune Response         | quantity                          | quantity of pro-B lymphocytes     | 1,52E-05 | CD28, IL7, IL2RG, IL7R, TCF4                                                                                                                                                                                                                                                                                                                                                                                                         | 5  |
| Humoral Immune Response         | development                       | development of B lymphocytes      | 1,06E-06 | EBF1, IL7, IL2RG, IL7R, JAK3, MYB (includes EG:4602), NOTCH2, TCF4, TNFSF13B, VAV1                                                                                                                                                                                                                                                                                                                                                   | 10 |
| Humoral Immune Response         | differentiation                   | differentiation of B lymphocytes  | 1,56E-06 | BCL11A, CD74, EBF1, IKZF1, IL7, IL2RB, IL2RG, IL7R, IRF4, NFAM1, PTPRC, TNFSF13B                                                                                                                                                                                                                                                                                                                                                     | 12 |
| Infectious Disease              | severe acute respiratory syndrome | severe acute respiratory syndrome | 6,07E-11 | ARL4C, CCR7, CD247, CLU, CSF2RB, IL10RA, IRF8, ITGAM, ITK, LCK, LEF1, LTB4R, SH2B3, SLC2A3, STAT4, TIMP2                                                                                                                                                                                                                                                                                                                             | 16 |
| Infectious Disease              | infectious disorder               | infectious disorder               | 1,05E-10 | ADRA2A, AFG3L1, AGAP2, AHR, ANTXR2, APOL1, ARL4C, BCL11A, CASP1, CCL5, CCR2, CCR5, CCR7, CD28, CD44, CD47, CD74, CD209, CD247, CELF2, CLU, CSF2RB, CTSS, CXCL9, CYBB, FCGR2A, FCGR2B, GABRP, GFRA1, HCK, HLA-C, HLA-DOA, HLA-DQB1, IL7, IL10RA, IL2RB, IL2RG, IL7R, IRF1, IRF8, ITGAL, ITGAM, ITGB2, ITK, LAPTM5, LCK, LCP2, LEF1, LTB4R, LYZ, MYO1F, PRF1, PTPRC, SELPLG, SFT2D1, SH2B3, SIPA1L2, SLC2A3, STAT4, TBX21, TIMP2, VAV1 | 62 |
| Infectious Disease              | infectious disorder               | infectious disorder of mice       | 3,97E-08 | AHR, ANTXR2, CASP1, CCR2, CCR5, CYBB, HCK, HLA-DQB1, IRF8, ITGB2, ITK, PRF1, STAT4, TBX21, VAV1                                                                                                                                                                                                                                                                                                                                      | 15 |
| Infectious Disease              | infection                         | infection of normal cells         | 8,56E-07 | CASP1, CCL5, CCR2, CCR5, CD44, CD209, IRF1, ITGAM                                                                                                                                                                                                                                                                                                                                                                                    | 8  |
| Infectious Disease              | infection                         | infection of leukocytes           | 1,81E-06 | CASP1, CCL5, CCR2, CCR5, CD209, IRF1, ITGAM                                                                                                                                                                                                                                                                                                                                                                                          | 7  |
| Infectious                      | infection                         | infection by                      | 1,21E-   | ANTXR2, CASP1, CCR2, CD44, CD209, ITGAM, LYZ, PRF1                                                                                                                                                                                                                                                                                                                                                                                   | 8  |

|                                        |                         |                                         |          |                                                                                                                                                                                                                                                                                                |    |
|----------------------------------------|-------------------------|-----------------------------------------|----------|------------------------------------------------------------------------------------------------------------------------------------------------------------------------------------------------------------------------------------------------------------------------------------------------|----|
| Disease                                |                         | bacteria                                | 05       |                                                                                                                                                                                                                                                                                                |    |
| Infectious Disease                     | myocarditis             | myocarditis                             | 1,50E-06 | CCR2, CCR5, CLU, PRF1, STAT4, TBX21                                                                                                                                                                                                                                                            | 6  |
| Infectious Disease                     | myocarditis             | myocarditis of mice                     | 6,67E-06 | CCR2, CCR5, PRF1, STAT4, TBX21                                                                                                                                                                                                                                                                 | 5  |
| Gene Expression                        | activation              | activation of synthetic promoter        | 1,43E-10 | ADRA2A, AHR, ATM, CD2, CD28, CD74, CLU, CSF2RB, CYTIP, ETS1, ETV6, FCGR2A, FLI1, GFI1, GPR65, IRF1, IRF4, IRF8, LCK, LCP2, LEF1, MYB (includes EG:4602), MYH9, NFATC2, NFKBIZ, NLRP3, PTPN22, RUNX1, RUNX2, SH2D1A, TCF4, TGFB2, TNFSF13B, WIPF1                                               | 34 |
| Gene Expression                        | activation              | activation of Nfat binding site         | 6,29E-08 | CD28, CD247, FLNA, LCK, NFATC2, VAV1                                                                                                                                                                                                                                                           | 6  |
| Gene Expression                        | transactivation         | transactivation                         | 9,63E-06 | ADAM12, AHR, CCND2, CD28, CD44, CD247, CIITA, CYTIP, ETS1, ETV6, FLI1, GFI1, IRF1, IRF4, IRF8, LEF1, MYB (includes EG:4602), NFATC2, NOTCH2, PTPN22, RGS18, RUNX1, RUNX2, SELPLG, TCF4, TGFB2, VAV1                                                                                            | 27 |
| Dermatological Diseases and Conditions | dermatological disorder | dermatological disorder                 | 1,53E-10 | ADRA2A, AHR, ATM, CASP1, CCL5, CD2, CD28, CD47, CD52, CD74, CLU, COL4A4 (includes EG:1286), COL6A3, CSF1R, CSF2RB, CXCL9, FCGR2A, GFI1, HLA-B, HLA-C, HLA-DRA, HLA-DRB1, IL7, IL2RB, IL2RG, ITGAL, ITGB2, LCK, LCP2, LEF1, MAP4K1, MMP7, NFKBIZ, NOD2, PRKCB, RASGRP4, SELL, STAT4, TMC6, TMC8 | 40 |
| Dermatological Diseases and Conditions | dermatitis              | dermatitis                              | 3,73E-06 | CASP1, CCL5, CD2, CD52, CD74, HLA-DRA, HLA-DRB1, IL2RB, IL2RG, ITGAL, ITGB2, LCP2, NFKBIZ                                                                                                                                                                                                      | 13 |
| Antigen Presentation                   | phagocytosis            | phagocytosis of phagocytes              | 6,05E-10 | ANXA1, CD44, CD47, CNN2, CSF2RB, DEF6, FCGR2A, FCGR2B, ITGAM, ITGB2, SELPLG                                                                                                                                                                                                                    | 11 |
| Antigen Presentation                   | phagocytosis            | phagocytosis of macrophages             | 1,23E-06 | ANXA1, CD44, CD47, CNN2, DEF6, FCGR2B, ITGB2                                                                                                                                                                                                                                                   | 7  |
| Antigen Presentation                   | phagocytosis            | phagocytosis of neutrophils             | 1,95E-06 | CD47, CSF2RB, FCGR2A, ITGAM, ITGB2, SELPLG                                                                                                                                                                                                                                                     | 6  |
| Antigen Presentation                   | processing              | processing of antigen                   | 2,09E-08 | CD74, FCGR2B, HLA-DMB, HLA-DOA, HLA-DQB1, HLA-DRA, HLA-DRB1                                                                                                                                                                                                                                    | 7  |
| Antigen Presentation                   | recruitment             | recruitment of antigen presenting cells | 2,35E-07 | ANXA1, CCL5, CCR2, CCR5, CD44, CD8A, ETS1, ITGB2, THBS2                                                                                                                                                                                                                                        | 9  |
| Antigen Presentation                   | recruitment             | recruitment of macrophages              | 1,01E-06 | ANXA1, CCR2, CCR5, CD44, CD8A, ETS1, ITGB2, THBS2                                                                                                                                                                                                                                              | 8  |
| Antigen Presentation                   | adhesion                | adhesion of antigen presenting cells    | 4,14E-07 | CD2, CD44, CD48, CD209, ITGAL, ITGAM, ITGB2                                                                                                                                                                                                                                                    | 7  |
| Antigen Presentation                   | adhesion                | adhesion of dendritic cells             | 7,05E-06 | CD44, CD209, ITGAL, ITGAM                                                                                                                                                                                                                                                                      | 4  |
| Antigen Presentation                   | quantity                | quantity of dendritic cells             | 2,13E-06 | CCR2, CCR7, CD47, IKZF1, IRF1, IRF4, IRF8, ITGB2                                                                                                                                                                                                                                               | 8  |
| Antigen Presentation                   | activation              | activation of antigen presenting cells  | 5,10E-06 | CCL5, CD74, CD209, CSF1R, FCGR2A, HCK, HLA-C, HLA-DMB, HLA-DOA, HLA-DQB1, IL7, ITGB6, STAT4                                                                                                                                                                                                    | 13 |
| Antigen Presentation                   | migration               | migration of dendritic cells            | 6,65E-06 | CCL5, CCR2, CCR5, CCR7, CD44, CD209, CXCL9, IL10RA, RAC2                                                                                                                                                                                                                                       | 9  |
| Antigen Presentation                   | binding                 | binding of antigen                      | 1,22E-05 | CD2, CD209, FYB, ITGAL, LCK, MRC1, PTPRC                                                                                                                                                                                                                                                       | 7  |

|                     |                                                      |                                                      |          |                                                                                                                                                                                                                                                                                                                                                                                                                                                                                                                                                                                                                                                                                                                                                                                                                                                                                                                                                                                                                                                                                                                                                                                                                                              |     |
|---------------------|------------------------------------------------------|------------------------------------------------------|----------|----------------------------------------------------------------------------------------------------------------------------------------------------------------------------------------------------------------------------------------------------------------------------------------------------------------------------------------------------------------------------------------------------------------------------------------------------------------------------------------------------------------------------------------------------------------------------------------------------------------------------------------------------------------------------------------------------------------------------------------------------------------------------------------------------------------------------------------------------------------------------------------------------------------------------------------------------------------------------------------------------------------------------------------------------------------------------------------------------------------------------------------------------------------------------------------------------------------------------------------------|-----|
| n                   |                                                      | presenting cells                                     |          |                                                                                                                                                                                                                                                                                                                                                                                                                                                                                                                                                                                                                                                                                                                                                                                                                                                                                                                                                                                                                                                                                                                                                                                                                                              |     |
| Cellular Compromise | degranulation                                        | degranulation of eukaryotic cells                    | 1,11E-09 | ANXA1, CD300A, FCGR2A, FCGR2B, HCK, ITGAM, ITGB2, ITK, KLRK1, LCP2, LTB4R, RAC2, SLA, VAV1, WIPF1                                                                                                                                                                                                                                                                                                                                                                                                                                                                                                                                                                                                                                                                                                                                                                                                                                                                                                                                                                                                                                                                                                                                            | 15  |
| Cellular Compromise | degranulation                                        | degranulation of mast cells                          | 3,22E-06 | ANXA1, CD300A, HCK, ITK, LCP2, RAC2, VAV1, WIPF1                                                                                                                                                                                                                                                                                                                                                                                                                                                                                                                                                                                                                                                                                                                                                                                                                                                                                                                                                                                                                                                                                                                                                                                             | 8   |
| Cellular Compromise | degranulation                                        | degranulation of granulocytes                        | 6,13E-06 | ANXA1, FCGR2A, FCGR2B, ITGAM, ITGB2, LTB4R                                                                                                                                                                                                                                                                                                                                                                                                                                                                                                                                                                                                                                                                                                                                                                                                                                                                                                                                                                                                                                                                                                                                                                                                   | 6   |
| Cellular Compromise | depletion                                            | depletion of mononuclear leukocytes                  | 1,23E-06 | CCR2, EOMES, IL2RB, NFATC2, SELL, TBX21, TNFSF13B                                                                                                                                                                                                                                                                                                                                                                                                                                                                                                                                                                                                                                                                                                                                                                                                                                                                                                                                                                                                                                                                                                                                                                                            | 7   |
| Cellular Compromise | depletion                                            | depletion of lymphocytes                             | 1,57E-05 | EOMES, IL2RB, NFATC2, SELL, TBX21, TNFSF13B                                                                                                                                                                                                                                                                                                                                                                                                                                                                                                                                                                                                                                                                                                                                                                                                                                                                                                                                                                                                                                                                                                                                                                                                  | 6   |
| Cellular Compromise | adhesion                                             | adhesion of leukemia cells                           | 2,01E-06 | AMICA1, CD44, ITGB2, SELL                                                                                                                                                                                                                                                                                                                                                                                                                                                                                                                                                                                                                                                                                                                                                                                                                                                                                                                                                                                                                                                                                                                                                                                                                    | 4   |
| Cellular Compromise | respiratory burst                                    | respiratory burst of leukocytes                      | 1,06E-05 | HCK, IRF8, ITGAL, ITGAM, ITGAX, ITGB2, PTPRC                                                                                                                                                                                                                                                                                                                                                                                                                                                                                                                                                                                                                                                                                                                                                                                                                                                                                                                                                                                                                                                                                                                                                                                                 | 7   |
| Cellular Compromise | respiratory burst                                    | respiratory burst                                    | 1,21E-05 | CYBB, HCK, IRF8, ITGAL, ITGAM, ITGAX, ITGB2, PTPRC                                                                                                                                                                                                                                                                                                                                                                                                                                                                                                                                                                                                                                                                                                                                                                                                                                                                                                                                                                                                                                                                                                                                                                                           | 8   |
| Genetic Disorder    | genetic disorder                                     | genetic disorder                                     | 2,37E-09 | ADAM12, ADAM19, ADCY7, ADRA2A, AHR, AKAP12, AMICA1, ANTXR1, ANTXR2, AOA, APOL1, ARHGDI, ARL4C, ATM, ATP2A3, BASP1, BATF3, BAZ1A, BCL11A, BCL11B, C13ORF18, C10RF63, C2CD2, CASP1, CCL5, CCND2, CCR2, CCR5, CCR7, CD2, CD28, CD44, CD47, CD48, CD52, CD53, CD74, CD96, CD209, CD247, CD3D, CD8A, CDC7, CELF2, CIITA, CLDN11, CLEC7A, CLU, COL4A4 (includes EG:1286), COL6A3, CP, CSF1R, CSF2RB, CTSS, CXCL9, CXCL16, CYBB, CYTH4, CYTIP, DGKA, EBF1, EMB, EMILIN2, ETV6, FCGR2A, FCGR2B, FLI1, FLNA, FMNL2 (includes EG:114793), FUBP1, FYB, GABRP, GAS7, GBP2, GFI1, GFRA1, GPR65, GZMA, GZMB, HCK, HLA-B, HLA-C, HLA-DMB, HLA-DOA, HLA-DPB1, HLA-DQB1, HLA-DRA, HLA-DRB1, HLA-DRB4, HLA-F, IL7, IL10RA, IL2RB, IL2RG, IL7R, IRF1, IRF8, ITGAL, ITGAM, ITGB2, ITGB6, ITK, JAK3, KCNK6, KCNT2, KLRB1, LAMP3, LCK, LCP2, LEF1, LHFP, LPCAT1, LYZ, MAP4K1, MARCKS, MMP7, MRC1, MS4A7, MYH9, MYO1F, NBP10, NCF4, NDP, NFATC2, NFKB1, NLRP3, NOD2, NOTCH2, NRP1, P2RY14, PLEK, PLXDC1, POLG2, PRF1, PRKCB, PTPRC, PTPRE, RAC2, RASGRP4, RNF213, ROBO1, RUNX1, RUNX2, SAMD3, SEC24D, SELL, SH2D1A, SIPA1L2, SLC2A3, STAT4, TBX21, TCF4, TFP12, TGFB2, THBS2, TIMP2, TMC6, TMC8, TNFSF13B, TPM1, TRD, TRIO, TSHZ2, TSHZ3, UBASH3B, VAV1, VIM, WDR33 | 168 |
| Genetic Disorder    | genetic disorder                                     | genetic disorder of mice                             | 5,54E-06 | ADAM12, ADRA2A, AHR, CASP1, CCL5, CCR2, CCR5, CD44, CYBB, FCGR2A, FCGR2B, GZMB, HCK, IL7, ITGAM, ITGB2, JAK3, LCP2, MMP7, RUNX1, STAT4, TBX21, TGFB2, VAV1                                                                                                                                                                                                                                                                                                                                                                                                                                                                                                                                                                                                                                                                                                                                                                                                                                                                                                                                                                                                                                                                                   | 24  |
| Genetic Disorder    | prostate cancer                                      | prostate cancer                                      | 1,87E-08 | ANTXR1, ANTXR2, ARHGDI, CCL5, CCR2, CCR7, CD44, CD52, CD74, CLDN11, CLU, CSF1R, CSF2RB, CYTIP, FLNA, GBP2, GZMA, HLA-DRB4, IL7R, IRF1, ITK, LCK, LEF1, LYZ, MMP7, PRKCB, PTPRC, RUNX1, RUNX2, TCF4                                                                                                                                                                                                                                                                                                                                                                                                                                                                                                                                                                                                                                                                                                                                                                                                                                                                                                                                                                                                                                           | 30  |
| Genetic Disorder    | severe combined immunodeficiency                     | severe combined immunodeficiency                     | 2,24E-07 | CD247, CD3D, IL2RG, IL7R, JAK3, PTPRC                                                                                                                                                                                                                                                                                                                                                                                                                                                                                                                                                                                                                                                                                                                                                                                                                                                                                                                                                                                                                                                                                                                                                                                                        | 6   |
| Genetic Disorder    | autosomal recessive severe combined immunodeficiency | autosomal recessive severe combined immunodeficiency | 3,84E-06 | CD3D, IL7R, JAK3                                                                                                                                                                                                                                                                                                                                                                                                                                                                                                                                                                                                                                                                                                                                                                                                                                                                                                                                                                                                                                                                                                                                                                                                                             | 3   |
| Genetic Disorder    | inflammatory bowel disease                           | inflammatory bowel disease of                        | 4,91E-06 | CASP1, CCR2, CCR5, CD44, IL7, MMP7, NOD2, STAT4, TGFB2                                                                                                                                                                                                                                                                                                                                                                                                                                                                                                                                                                                                                                                                                                                                                                                                                                                                                                                                                                                                                                                                                                                                                                                       | 9   |

|                                    |                       |                                           |          |                                                                                                                                                                                                                                                                                                                                                         |    |  |
|------------------------------------|-----------------------|-------------------------------------------|----------|---------------------------------------------------------------------------------------------------------------------------------------------------------------------------------------------------------------------------------------------------------------------------------------------------------------------------------------------------------|----|--|
|                                    |                       | mammalia                                  |          |                                                                                                                                                                                                                                                                                                                                                         |    |  |
| Genetic Disorder                   | multiple sclerosis    | multiple sclerosis                        | 8,26E-06 | ADRA2A, CASP1, CD52, CIITA, GFI1, HLA-DMB, HLA-DQB1, HLA-DRA, HLA-DRB1, HLA-F, IL7, IL7R, KLRB1, PTPRC                                                                                                                                                                                                                                                  | 14 |  |
| Genetic Disorder                   | colitis               | colitis of mice                           | 8,67E-06 | CASP1, CCR2, CCR5, CD44, IL7, MMP7, STAT4, TGFBR2                                                                                                                                                                                                                                                                                                       | 8  |  |
| Cellular Assembly and Organization | organization          | organization of cytoskeleton              | 1,66E-08 | ANTXR1, CD44, CD47, CLU, CXCL9, FLNA, ITK, LCK, LCP1, MARCKS, MYH9, PLEK, TRIO, VAV1                                                                                                                                                                                                                                                                    | 14 |  |
| Cellular Assembly and Organization | reorganization        | reorganization of cytoskeleton            | 5,81E-07 | ANTXR1, CD44, CD47, CXCL9, FLNA, ITK, LCK, MYH9, PLEK, TRIO, VAV1                                                                                                                                                                                                                                                                                       | 11 |  |
| Cellular Assembly and Organization | polymerization        | polymerization of actin                   | 6,14E-07 | CD47, DEF6, ITGAL, ITGB2, ITK, LCP2, VAV1, WIPF1                                                                                                                                                                                                                                                                                                        | 8  |  |
| Cellular Assembly and Organization | formation             | formation of immunological synapses       | 1,07E-06 | CD28, CD209, DEF6, ITGAM, ITK                                                                                                                                                                                                                                                                                                                           | 5  |  |
| Reproductive System Disease        | prostate cancer       | prostate cancer                           | 1,87E-08 | ANTXR1, ANTXR2, ARHGDI1, CCL5, CCR2, CCR7, CD44, CD52, CD74, CLDN11, CLU, CSF1R, CSF2RB, CYTIP, FLNA, GBP2, GZMA, HLA-DRB4, IL7R, IRF1, ITK, LCK, LEF1, LYZ, MMP7, PRKCB, PTPRC, RUNX1, RUNX2, TCF4                                                                                                                                                     | 30 |  |
| Reproductive System Disease        | endometriosis         | endometriosis                             | 3,20E-06 | AHR, CASP1, CSF1R, CXCL9, GZMA, HLA-C, IL2RB, IL2RG, ITGAL, ITGAM, LTB4R, MARCKS, MMP7, NOTCH2, PRKCB, PTPN22, SLC2A3, THBS2, TIMP2, TNFSF13B, VIM                                                                                                                                                                                                      | 21 |  |
| Free Radical Scavenging            | production            | production of reactive oxygen species     | 3,38E-08 | ANXA1, ARHGDI1, CCL5, CD28, CD44, CD47, CD52, CYBB, GZMA, GZMB, GZMK, LCP2, PRF1, PRKCB, RAC2, SELPLG                                                                                                                                                                                                                                                   | 16 |  |
| Free Radical Scavenging            | production            | production of superoxide                  | 1,41E-05 | CXCL9, CYBB, ETS1, HCK, ITGAM, ITGAX, ITGB2, PRKCB, RAC2                                                                                                                                                                                                                                                                                                | 9  |  |
| Cell Cycle                         | cell division process | cell division process of leukocytes       | 4,76E-08 | ATM, CD28, CD44, GFI1, IL7, IL2RB, ITGAL, LEF1, NFATC2, STAT4, TNFSF13B, VAV1                                                                                                                                                                                                                                                                           | 12 |  |
| Cell Cycle                         | cell division process | cell division process of lymphocytes      | 1,12E-07 | ATM, CD28, GFI1, IL7, IL2RB, ITGAL, LEF1, NFATC2, STAT4, TNFSF13B, VAV1                                                                                                                                                                                                                                                                                 | 11 |  |
| Cell Cycle                         | cell division process | cell division process of T lymphocytes    | 1,22E-07 | ATM, CD28, GFI1, IL7, IL2RB, ITGAL, STAT4, TNFSF13B, VAV1                                                                                                                                                                                                                                                                                               | 9  |  |
| Cell Cycle                         | cell division process | cell division process                     | 1,37E-07 | AHR, AKAP12, ANAPC4, ANXA1, ATM, BCL2A1, CCND2, CD28, CD44, CD247, CDC7, CLU, CSF1R, ETS1, ETV6, FCGR2B, FLI1, FLNA, FUBP1, GAS7, GFI1, GFRA1, HHEX, IL7, IL2RB, IRF1, ITGAL, JAK3, LCK, LEF1, MARCKS, MYB (includes EG:4602), MYH9, NFATC2, NOTCH2, PRKCB, PTPN22, PTPRC, RASSF2, RASSF5, RUNX1, RUNX2, SH2B3, SLA, STAT4, TIMP2, TNFSF13B, TPM1, VAV1 | 49 |  |
| Cell Cycle                         | cell division process | cell division process of bone cell lines  | 6,54E-07 | CCND2, CSF1R, FCGR2B, JAK3, MYB (includes EG:4602), RUNX2, SH2B3                                                                                                                                                                                                                                                                                        | 7  |  |
| Cell Cycle                         | cell division process | cell division process of eukaryotic cells | 6,70E-07 | AHR, AKAP12, ATM, CCND2, CD28, CD44, CD247, CDC7, CLU, CSF1R, ETS1, FCGR2B, FLI1, FUBP1, GFI1, GFRA1, IL7, IL2RB, IRF1, ITGAL, JAK3, LEF1, MYB (includes EG:4602), NFATC2, NOTCH2, PRKCB, PTPN22, RASSF5, RUNX1, RUNX2, SH2B3, SLA, STAT4, TIMP2, TNFSF13B, VAV1                                                                                        | 36 |  |
| Cell Cycle                         | cell division process | cell division process of cell lines       | 9,80E-06 | AHR, AKAP12, ATM, CCND2, CD44, CDC7, CLU, CSF1R, ETS1, FCGR2B, FLI1, FUBP1, GFI1, IL7, IRF1, JAK3, LEF1, MYB (includes EG:4602), NOTCH2, PRKCB, PTPN22, RASSF5, RUNX1, RUNX2, SH2B3, SLA, TIMP2, VAV1                                                                                                                                                   | 28 |  |

|                                           |                        |                                               |          |                                                                                                                                                                                                                      |    |
|-------------------------------------------|------------------------|-----------------------------------------------|----------|----------------------------------------------------------------------------------------------------------------------------------------------------------------------------------------------------------------------|----|
| Cell Cycle                                | cell division process  | arrest in cell division process               | 1,07E-05 | AHR, AKAP12, ATM, CCND2, CD28, CD44, CD247, CDC7, ETV6, FLNA, FUBP1, GAS7, GFI1, IL7, JAK3, LCK, LEF1, MYB (includes EG:4602), NOTCH2, PTPN22, RASSF2, RUNX1, TIMP2, VAV1                                            | 24 |
| Cell Cycle                                | cell division process  | cell division process of leukocyte cell lines | 1,50E-05 | CCND2, CSF1R, FCGR2B, IL7, JAK3, MYB (includes EG:4602), RUNX1, SH2B3                                                                                                                                                | 8  |
| Cell Cycle                                | interphase             | interphase of bone cell lines                 | 3,94E-07 | CCND2, JAK3, MYB (includes EG:4602), RUNX2, SH2B3                                                                                                                                                                    | 5  |
| Cell Cycle                                | cell cycle progression | cell cycle progression of blood cells         | 1,26E-06 | ATM, CD28, CD44, IL7, ITGAL, NFATC2, STAT4, TNFSF13B, VAV1                                                                                                                                                           | 9  |
| Cell Cycle                                | cell cycle progression | cell cycle progression of leukocytes          | 1,59E-06 | ATM, CD28, CD44, IL7, ITGAL, NFATC2, TNFSF13B, VAV1                                                                                                                                                                  | 8  |
| Cell Cycle                                | cell cycle progression | cell cycle progression of lymphocytes         | 7,99E-06 | ATM, CD28, IL7, ITGAL, NFATC2, TNFSF13B, VAV1                                                                                                                                                                        | 7  |
| Cell Cycle                                | cell cycle progression | cell cycle progression                        | 1,59E-05 | AHR, ANXA1, ATM, BCL2A1, CCND2, CD28, CD44, CDC7, CLU, CSF1R, ETS1, FCGR2B, FLI1, GAS7, HHEX, IL7, IRF1, ITGAL, LCK, LEF1, MARCKS, NFATC2, NOTCH2, PRKCB, PTPRC, RASSF2, RASSF5, RUNX1, STAT4, TIMP2, TNFSF13B, VAV1 | 32 |
| Cell Cycle                                | G1 phase               | G1 phase of eukaryotic cells                  | 5,10E-06 | AHR, AKAP12, ATM, CCND2, CD28, CD247, GFI1, IL7, JAK3, LEF1, MYB (includes EG:4602), NOTCH2, PTPN22, RUNX2, TIMP2, VAV1                                                                                              | 16 |
| Cell Cycle                                | G1 phase               | G1 phase of bone cell lines                   | 7,05E-06 | CCND2, JAK3, MYB (includes EG:4602), RUNX2                                                                                                                                                                           | 4  |
| Cell Cycle                                | cell stage             | arrest in cell stage                          | 1,65E-05 | AHR, AKAP12, ATM, CCND2, CD28, CD44, CD247, CDC7, ETV6, FLNA, GFI1, IL7, JAK3, MYB (includes EG:4602), NOTCH2, PTPN22, RUNX1, TIMP2, VAV1                                                                            | 19 |
| Hypersensitivity Response                 | activation             | activation of mast cells                      | 4,95E-08 | CCL5, CCR2, CD48, CD300A, FCGR2A, FCGR2B, FYB, ITGAM, LCP2                                                                                                                                                           | 9  |
| Hypersensitivity Response                 | cell movement          | cell movement of eosinophils                  | 9,47E-07 | CCL5, CD2, CD47, CD48, CXCL9, IL2RB, ITGAL, ITGAM, ITGB2, ITK                                                                                                                                                        | 10 |
| Hypersensitivity Response                 | transmigration         | transmigration of eosinophils                 | 2,43E-06 | CD47, CXCL9, ITGAL, ITGAM, ITGB2                                                                                                                                                                                     | 5  |
| Hypersensitivity Response                 | degranulation          | degranulation of mast cells                   | 3,22E-06 | ANXA1, CD300A, HCK, ITK, LCP2, RAC2, VAV1, WIPF1                                                                                                                                                                     | 8  |
| Lymphoid Tissue Structure and Development | quantity               | quantity of lymphatic system cells            | 8,81E-08 | AHR, CD8A, CNN2, CSF2RB, ETS1, FLI1, IKZF1, IRF8, ITGB2, JAK3, RAC2, SELL, SELPLG, SH2B3, STAT4, THBS2                                                                                                               | 16 |
| Lymphoid Tissue Structure and Development | quantity               | quantity of bone marrow cells                 | 1,73E-07 | AHR, CD8A, CNN2, CSF2RB, FLI1, IKZF1, IRF8, ITGB2, JAK3, RAC2, SELL, SELPLG, SH2B3, STAT4, THBS2                                                                                                                     | 15 |
| Lymphoid Tissue Structure and Development | quantity               | quantity of myeloid cells                     | 2,13E-07 | AHR, CD8A, CNN2, CSF2RB, FLI1, IKZF1, IRF8, ITGB2, JAK3, RAC2, SELL, SELPLG, SH2B3, STAT4                                                                                                                            | 14 |

|                                                |                |                                         |          |                                                                                                                |    |
|------------------------------------------------|----------------|-----------------------------------------|----------|----------------------------------------------------------------------------------------------------------------|----|
| nt                                             |                |                                         |          |                                                                                                                |    |
| Lymphoid Tissue Structure and Development      | quantity       | quantity of granulocytes                | 3,16E-07 | AHR, CD8A, CNN2, CSF2RB, FLI1, IRF8, ITGB2, JAK3, RAC2, SELL, SELPLG, SH2B3, STAT4                             | 13 |
| Lymphoid Tissue Structure and Development      | homing         | homing of lymphatic system cells        | 3,55E-06 | ANXA1, CCL5, CD28, CD44, CXCL9, FCGR2A, HCK, ITGAM, ITGB2, LTB4R, PTPRC, RAC2                                  | 12 |
| Lymphoid Tissue Structure and Development      | development    | development of lymphatic system cells   | 6,65E-06 | CD44, CD8A, ETV6, IL7, IL2RB, IL2RG, JAK3, LCP2, THBS2                                                         | 9  |
| Lymphoid Tissue Structure and Development      | chemotaxis     | chemotaxis of myeloid cells             | 9,94E-06 | ANXA1, CCL5, CD28, CXCL9, FCGR2A, HCK, ITGAM, ITGB2, LTB4R, PTPRC, RAC2                                        | 11 |
| Lymphoid Tissue Structure and Development      | proliferation  | proliferation of lymphatic system cells | 9,94E-06 | CCND2, CD44, CD8A, CSF1R, IL7, IL2RG, IRF8, LTB4R, PTPRC, RUNX1, SH2B3                                         | 11 |
| Lymphoid Tissue Structure and Development      | aggregation    | aggregation of neutrophils              | 1,16E-05 | ITGAM, ITGB2, SELL, SELPLG                                                                                     | 4  |
| Cardiovascular System Development and Function | adhesion       | adhesion of endothelial tissue          | 9,94E-08 | ANXA1, CD209, ITGAM, ITGB2, SELL, VAV1                                                                         | 6  |
| Cardiovascular System Development and Function | adhesion       | adhesion of endothelial cells           | 5,38E-07 | AMICA1, CCL5, CD44, ITGAL, ITGAM, ITGAX, ITGB2, SELL, SELPLG, TGFBR2                                           | 10 |
| Organismal Injury and Abnormalities            | damage         | damage of organ                         | 2,10E-07 | AHR, ANXA1, CASP1, CCR2, CCR5, CD44, CYBB, FCGR2A, FCGR2B, HCK, ITGAL, ITGB2, ITGB6, NLRP3, PRF1, STAT4, TIMP2 | 17 |
| Organismal Injury and Abnormalities            | injury         | injury of organ                         | 2,86E-06 | AHR, ANXA1, CASP1, CYBB, FCGR2A, FCGR2B, ITGAL, ITGB2, ITGB6, NLRP3, STAT4, TIMP2                              | 12 |
| Organismal Injury and Abnormalities            | cytosis        | cytosis                                 | 8,71E-06 | CASP1, CCR2, CSF1R, DEF6, IL2RB, IL2RG, ITGB2, LCK, MYB (includes EG:4602), RAC2, RASGRP4, RUNX1, SELL         | 13 |
| Protein Synthesis                              | polymerization | polymerization of actin                 | 6,14E-07 | CD47, DEF6, ITGAL, ITGB2, ITK, LCP2, VAV1, WIPF1                                                               | 8  |
| Antimicrobial Response                         | elimination    | elimination of virus                    | 8,71E-07 | CD8A, GZMA, GZMB, PRF1                                                                                         | 4  |
| Antimicrobial Response                         | elimination    | elimination of Murine                   | 3,84E-06 | GZMA, GZMB, PRF1                                                                                               | 3  |

|                            |                                     |                                         |          |                                                                                                                                                                                                                                                                                                                                                                                                                                                                                                                                                              |  |    |
|----------------------------|-------------------------------------|-----------------------------------------|----------|--------------------------------------------------------------------------------------------------------------------------------------------------------------------------------------------------------------------------------------------------------------------------------------------------------------------------------------------------------------------------------------------------------------------------------------------------------------------------------------------------------------------------------------------------------------|--|----|
|                            |                                     | cytomegalovirus                         |          |                                                                                                                                                                                                                                                                                                                                                                                                                                                                                                                                                              |  |    |
| Cardiovascular Disease     | myocarditis                         | myocarditis                             | 1,50E-06 | CCR2, CCR5, CLU, PRF1, STAT4, TBX21                                                                                                                                                                                                                                                                                                                                                                                                                                                                                                                          |  | 6  |
| Cardiovascular Disease     | myocarditis                         | myocarditis of mice                     | 6,67E-06 | CCR2, CCR5, PRF1, STAT4, TBX21                                                                                                                                                                                                                                                                                                                                                                                                                                                                                                                               |  | 5  |
| Cardiovascular Disease     | cardiovascular disorder             | cardiovascular disorder of blood vessel | 7,72E-06 | AHR, CD44, CLU, DEF6, ETS1, ITGAM, ITGAX, PRKCB                                                                                                                                                                                                                                                                                                                                                                                                                                                                                                              |  | 8  |
| Cardiovascular Disease     | cardiovascular disorder             | cardiovascular disorder of mice         | 9,93E-06 | ADRA2A, CASP1, CCR2, CCR5, CD44, CLU, CTSS, CYBB, HCK, HCLS1, ITGAM, MMP7, PRF1, PRKCB, STAT4, TBX21, THBS2                                                                                                                                                                                                                                                                                                                                                                                                                                                  |  | 17 |
| Tumor Morphology           | adhesion                            | adhesion of leukemia cells              | 2,01E-06 | AMICA1, CD44, ITGB2, SELL                                                                                                                                                                                                                                                                                                                                                                                                                                                                                                                                    |  | 4  |
| Endocrine System Disorders | diabetes mellitus                   | diabetes mellitus                       | 3,49E-06 | ADAM12, ADRA2A, AMICA1, ANAPC4, ANXA1, C13ORF18, CCND2, CCR2, CD2, CD28, CD44, CD48, CD52, CD53, CD74, CD96, CDC7, CELF2, CHODL, CIITA, CLU, CP, CYBB, EBF1, EMB, FLI1, GABRP, GBP2, HLA-B, HLA-C, HLA-DOA, HLA-DPA1, HLA-DQB1, HLA-DRA, HLA-DRB4, HLA-F, IL2RB, IL7R, IRF1, ITGAL, ITGB2, KCNT2, KLRB1, LHFP, MS4A7, MYH9, NFATC2, NOD2, NOTCH2, NRP1, P2RY14, PLEK, PRKCB, PTPN22, PTPRE, RNF213, ROBO1, RUNX1, SAMD3, SELL, SH2B3, SIRPG, SLC2A3, STAT4, TAP1, TCF4, TGFB2, TNFSF13B, TRIO, TSHZ2                                                         |  | 70 |
| Endocrine System Disorders | insulin-dependent diabetes mellitus | insulin-dependent diabetes mellitus     | 4,40E-06 | ADAM12, ADRA2A, AMICA1, ANAPC4, CCR2, CD2, CD44, CD53, CDC7, CHODL, CIITA, FLI1, HLA-B, HLA-C, HLA-DOA, HLA-DPA1, HLA-DQB1, HLA-DRA, HLA-F, IL2RB, IL7R, ITGAL, KLRB1, LHFP, MYH9, NFATC2, NOD2, NOTCH2, PRKCB, PTPN22, RNF213, ROBO1, RUNX1, SH2B3, SIRPG, STAT4, TAP1, TGFB2, TNFSF13B, TSHZ2                                                                                                                                                                                                                                                              |  | 40 |
| Endocrine System Disorders | endocrine system disorder           | endocrine system disorder               | 1,33E-05 | ADAM12, ADRA2A, AHR, AMICA1, ANAPC4, ANXA1, C13ORF18, CCND2, CCR2, CD2, CD28, CD44, CD48, CD52, CD53, CD74, CD96, CDC7, CELF2, CHODL, CIITA, CLU, CP, CYBB, EBF1, EMB, ETS1, FLI1, GABRP, GBP2, HLA-B, HLA-C, HLA-DOA, HLA-DPA1, HLA-DQB1, HLA-DRA, HLA-DRB4, HLA-F, IL2RB, IL7R, IRF1, ITGAL, ITGB2, KCNT2, KLRB1, LHFP, MS4A7, MYH9, NFATC2, NOD2, NOTCH2, NRP1, P2RY14, PLEK, PRKCB, PTPN22, PTPRE, RNF213, ROBO1, RUNX1, SAMD3, SELL, SH2B3, SIRPG, SLC2A3, STAT4, TAP1, TCF4, TGFB2, TNFSF13B, TRIO, TSHZ2                                              |  | 72 |
| Metabolic Disease          | diabetes mellitus                   | diabetes mellitus                       | 3,49E-06 | ADAM12, ADRA2A, AMICA1, ANAPC4, ANXA1, C13ORF18, CCND2, CCR2, CD2, CD28, CD44, CD48, CD52, CD53, CD74, CD96, CDC7, CELF2, CHODL, CIITA, CLU, CP, CYBB, EBF1, EMB, FLI1, GABRP, GBP2, HLA-B, HLA-C, HLA-DOA, HLA-DPA1, HLA-DQB1, HLA-DRA, HLA-DRB4, HLA-F, IL2RB, IL7R, IRF1, ITGAL, ITGB2, KCNT2, KLRB1, LHFP, MS4A7, MYH9, NFATC2, NOD2, NOTCH2, NRP1, P2RY14, PLEK, PRKCB, PTPN22, PTPRE, RNF213, ROBO1, RUNX1, SAMD3, SELL, SH2B3, SIRPG, SLC2A3, STAT4, TAP1, TCF4, TGFB2, TNFSF13B, TRIO, TSHZ2                                                         |  | 70 |
| Metabolic Disease          | insulin-dependent diabetes mellitus | insulin-dependent diabetes mellitus     | 4,40E-06 | ADAM12, ADRA2A, AMICA1, ANAPC4, CCR2, CD2, CD44, CD53, CDC7, CHODL, CIITA, FLI1, HLA-B, HLA-C, HLA-DOA, HLA-DPA1, HLA-DQB1, HLA-DRA, HLA-F, IL2RB, IL7R, ITGAL, KLRB1, LHFP, MYH9, NFATC2, NOD2, NOTCH2, PRKCB, PTPN22, RNF213, ROBO1, RUNX1, SH2B3, SIRPG, STAT4, TAP1, TGFB2, TNFSF13B, TSHZ2                                                                                                                                                                                                                                                              |  | 40 |
| Metabolic Disease          | metabolic disorder                  | metabolic disorder                      | 6,44E-06 | ADAM12, ADRA2A, AMICA1, ANAPC4, ANXA1, C13ORF18, CASP1, CCL5, CCND2, CCR2, CCR5, CD2, CD28, CD44, CD47, CD48, CD52, CD53, CD74, CD96, CDC7, CELF2, CHODL, CIITA, CLU, CP, CYBB, EBF1, EMB, ETS1, FCGR2A, FLI1, GABRP, GBP2, HLA-B, HLA-C, HLA-DOA, HLA-DPA1, HLA-DQB1, HLA-DRA, HLA-DRB4, HLA-F, IL7, IL2RB, IL7R, IRF1, ITGAL, ITGB2, KCNT2, KLRB1, LHFP, LYZ, MS4A7, MYH9, NFATC2, NOD2, NOTCH2, NRP1, P2RY14, PLEK, PRKCB, PTPN22, PTPRE, RNF213, ROBO1, RUNX1, RUNX2, SAMD3, SELL, SH2B3, SIRPG, SLC2A3, STAT4, TAP1, TCF4, TGFB2, TNFSF13B, TRIO, TSHZ2 |  | 79 |
| Gastrointestinal Disease   | inflammatory bowel disease          | inflammatory bowel disease of mammalia  | 4,91E-06 | CASP1, CCR2, CCR5, CD44, IL7, MMP7, NOD2, STAT4, TGFB2                                                                                                                                                                                                                                                                                                                                                                                                                                                                                                       |  | 9  |
| Gastrointestinal           | colitis                             | colitis of mice                         | 8,67E-06 | CASP1, CCR2, CCR5, CD44, IL7, MMP7, STAT4, TGFB2                                                                                                                                                                                                                                                                                                                                                                                                                                                                                                             |  | 8  |



| Disease                                               |                    |                             |          |                                                                                                        |    |
|-------------------------------------------------------|--------------------|-----------------------------|----------|--------------------------------------------------------------------------------------------------------|----|
| Renal and Urological Disease                          | nephritis          | nephritis                   | 5,14E-06 | CCL5, CD2, CD28, CD8A, CLU, CXCL16, FCGR2B, HLA-DQB1, ITGAL, PTPRC, TNFSF13B                           | 11 |
| Skeletal and Muscular System Development and Function | G1 phase           | G1 phase of bone cell lines | 7,05E-06 | CCND2, JAK3, MYB (includes EG:4602), RUNX2                                                             | 4  |
| Neurological Disease                                  | multiple sclerosis | multiple sclerosis          | 8,26E-06 | ADRA2A, CASP1, CD52, CIITA, GFI1, HLA-DMB, HLA-DQB1, HLA-DRA, HLA-DRB1, HLA-F, IL7, IL7R, KLRB1, PTPRC | 14 |
| Infection Mechanism                                   | infection          | infection by bacteria       | 1,21E-05 | ANTXR2, CASP1, CCR2, CD44, CD209, ITGAM, LYZ, PRF1                                                     | 8  |

**SUPPLEMENTAL TABLE 2**

© 2000-2010 Ingenuity Systems, Inc. All rights reserved.

**703 probeset list enrichment analysis (biological functions)**

| Category              | Function        | Function Annotation                    | p-value  | Molecules                                                                                                                                                                                                                                                                                                                                                                                                                                                                                                                                                                                                                                                                                                                                                                                                                                                                                                                                                                                                  | # Molecules |
|-----------------------|-----------------|----------------------------------------|----------|------------------------------------------------------------------------------------------------------------------------------------------------------------------------------------------------------------------------------------------------------------------------------------------------------------------------------------------------------------------------------------------------------------------------------------------------------------------------------------------------------------------------------------------------------------------------------------------------------------------------------------------------------------------------------------------------------------------------------------------------------------------------------------------------------------------------------------------------------------------------------------------------------------------------------------------------------------------------------------------------------------|-------------|
| Inflammatory Response | immune response | immune response                        | 2,77E-74 | AHR, APAF1, APOBEC3G, APOL1, BTK, C1QA, C1QB, C3AR1, CASP1, CCL2, CCL4, CCL5, CCL19, CCL21, CCR2, CCR5, CD2, CD28, CD47, CD48, CD69, CD84, CD86, CD96, CD163, CD244, CD247, CD1B, CD1C, CD1D, CD1E, CD300A, CD3E, CD8A, CFH, CIITA, CLEC4C, CLEC7A, CORO1A, CSF1R, CST7, CTLA4, CTSS, CTSW, CX3CR1, CXCL6, CXCL9, CXCR4, CYBB, DOCK2, ERAP2, ETS1, FAS, FCER1A, FCER1G, FCGR1A, FCGR2A, FCGR3B, FLI1, FYB, GBP2, GIMAP5, GPR65, GPSM3, GZMA, GZMB, GZMH, HCK, HIF1A, HLA-DMB, HLA-DOA, HLA-DQA1, HLA-DQB1, HLA-DRA, ICOS, IDO1, IGHG1, IGHM, IL10RA, IL10RB, IL12RB1, IL2RB, IL2RG, IL7R, IRF8, ITGAL, ITGAM, ITGAX, ITGB2, ITGB6, ITK, JAK3, KLRD1, KLRK1, LAT2, LAX1, LCK, LCP2, LTF, LY75, LY96, LYN, MMP7, MX2, NCF2, NCF4, NLRP3, P2RY14, PIK3CD, PLSCR1, POU2AF1, PRDM1, PRF1, PSMB9, PTGER4, PTGES, PTPRC, RGS1, RNASE6, SECTM1, SELPLG, SIRPG, SIT1, SLAMF6, SP140, STAT1, STAT4, TAP1, TBX21, TLR4, TLR7, TLR8 (includes EG:51311), TNC, TNFRSF17, TNFRSF1B, TNFSF13B, TRA@, TRIM22, TYROBP, VAV1 | 140         |
| Inflammatory Response | immune response | immune response of T lymphocytes       | 7,06E-10 | C3AR1, CASP1, CD28, CD69, CD1D, CD8A, CTLA4, HLA-DQB1, ICOS, IL7R, ITK, PTPRC, TNFRSF1B                                                                                                                                                                                                                                                                                                                                                                                                                                                                                                                                                                                                                                                                                                                                                                                                                                                                                                                    | 13          |
| Inflammatory Response | activation      | activation of leukocytes               | 1,47E-45 | BTK, C1QA, C3AR1, CCL2, CCL4, CCL5, CCR2, CD2, CD28, CD47, CD48, CD86, CD163, CD244, CD247, CD1B, CD1C, CD1D, CD1E, CD300A, CD3E, CD8A, CFH, CLEC4C, CLEC7A, CORO1A, CSF1R, CTLA4, CXCL6, CXCL9, DOCK2, FAS, FCER1G, FCGR1A, FCGR2A, FYB, GIMAP5, GZMA, GZMB, HCK, HLA-DMB, HLA-DOA, HLA-DQA1, HLA-DQB1, HLA-DRA, ICOS, IGHG1, IGHM, IL12RB1, IL2RB, ITGAL, ITGAM, ITGB2, ITGB6, ITK, JAK3, KLRD1, KLRK1, LAT2, LAX1, LCK, LCP2, LTF, LY96, LYN, PIK3CD, POU2AF1, PRF1, PSMB9, PTGES, PTPRC, SIRPG, SIT1, SLAMF6, STAT1, STAT4, TBX21, TLR4, TLR7, TLR8 (includes EG:51311), TNC, TNFRSF17, TNFRSF1B, TNFSF13B, TYROBP, VAV1                                                                                                                                                                                                                                                                                                                                                                               | 86          |
| Inflammatory Response | activation      | activation of mononuclear leukocytes   | 1,22E-39 | BTK, C1QA, C3AR1, CCL2, CCL4, CCL5, CCR2, CD2, CD28, CD47, CD48, CD86, CD163, CD244, CD247, CD1B, CD1C, CD1D, CD1E, CD3E, CD8A, CLEC4C, CLEC7A, CORO1A, CTLA4, DOCK2, FAS, FCER1G, FCGR2A, GIMAP5, GZMA, GZMB, HLA-DRA, ICOS, IGHG1, IGHM, IL12RB1, IL2RB, ITGAL, ITGB2, ITK, JAK3, KLRD1, KLRK1, LAT2, LAX1, LCK, LTF, LY96, LYN, PIK3CD, POU2AF1, PRF1, PTPRC, SIRPG, SIT1, SLAMF6, STAT1, STAT4, TBX21, TLR4, TLR7, TLR8 (includes EG:51311), TNC, TNFRSF17, TNFRSF1B, TNFSF13B, TYROBP, VAV1                                                                                                                                                                                                                                                                                                                                                                                                                                                                                                           | 69          |
| Inflammatory Response | activation      | activation of lymphocytes              | 3,94E-39 | BTK, C1QA, C3AR1, CCL2, CCL4, CCL5, CCR2, CD2, CD28, CD47, CD48, CD86, CD244, CD247, CD1B, CD1C, CD1D, CD1E, CD3E, CD8A, CLEC4C, CLEC7A, CORO1A, CTLA4, DOCK2, FAS, FCER1G, FCGR2A, GIMAP5, GZMA, GZMB, HLA-DRA, ICOS, IGHG1, IGHM, IL12RB1, IL2RB, ITGAL, ITGB2, ITK, JAK3, KLRD1, KLRK1, LAT2, LAX1, LCK, LTF, LYN, PIK3CD, POU2AF1, PRF1, PTPRC, SIRPG, SIT1, SLAMF6, STAT1, STAT4, TBX21, TLR4, TLR7, TLR8 (includes EG:51311), TNC, TNFRSF17, TNFRSF1B, TNFSF13B, TYROBP, VAV1                                                                                                                                                                                                                                                                                                                                                                                                                                                                                                                        | 67          |
| Inflammatory Response | activation      | activation of T lymphocytes            | 3,31E-31 | C3AR1, CCL2, CCL4, CCL5, CCR2, CD2, CD28, CD47, CD48, CD86, CD244, CD247, CD1D, CD3E, CD8A, CLEC4C, CLEC7A, CORO1A, CTLA4, DOCK2, FAS, FCER1G, GIMAP5, GZMA, GZMB, HLA-DRA, ICOS, IGHG1, IL2RB, ITGAL, ITGB2, ITK, JAK3, KLRD1, LAT2, LAX1, LCK, PIK3CD, PRF1, PTPRC, SIRPG, SIT1, STAT1, STAT4, TBX21, TLR4, TLR7, TLR8 (includes EG:51311), TNC, TNFRSF17, TNFRSF1B, TNFSF13B, TYROBP, VAV1                                                                                                                                                                                                                                                                                                                                                                                                                                                                                                                                                                                                              | 52          |
| Inflammatory Response | activation      | activation of antigen presenting cells | 1,93E-12 | CCL2, CCL4, CCL5, CD86, CD1D, CSF1R, FAS, FCER1G, FCGR1A, FCGR2A, HCK, HLA-DMB, HLA-DOA, HLA-DQA1, HLA-DQB1, IGHM, ITGB6, LTF, PSMB9, PTGES, STAT1, STAT4, TLR4, TLR7, TNFRSF1B                                                                                                                                                                                                                                                                                                                                                                                                                                                                                                                                                                                                                                                                                                                                                                                                                            | 25          |
| Inflammatory Response | activation      | activation of B lymphocytes            | 7,97E-11 | BTK, C1QA, CD86, CD8A, FAS, IGHG1, IGHM, LAT2, LAX1, LYN, PIK3CD, POU2AF1, PTPRC, TLR4, TNFRSF17, TNFSF13B, VAV1                                                                                                                                                                                                                                                                                                                                                                                                                                                                                                                                                                                                                                                                                                                                                                                                                                                                                           | 17          |
| Inflammatory Response | activation      | activation of natural killer           | 3,15E-10 | CCL5, CD2, CD28, CD244, CD1D, FCGR2A, IL12RB1, IL2RB, ITGAL, ITGB2, KLRD1, KLRK1, LTF, PRF1, SLAMF6, STAT4, TYROBP                                                                                                                                                                                                                                                                                                                                                                                                                                                                                                                                                                                                                                                                                                                                                                                                                                                                                         | 17          |

|                       |                       |                                      |          |                                                                                                                                                                                                                                                                                                                                                                                                                                                                      |    |  |
|-----------------------|-----------------------|--------------------------------------|----------|----------------------------------------------------------------------------------------------------------------------------------------------------------------------------------------------------------------------------------------------------------------------------------------------------------------------------------------------------------------------------------------------------------------------------------------------------------------------|----|--|
|                       |                       | cells                                |          |                                                                                                                                                                                                                                                                                                                                                                                                                                                                      |    |  |
| Inflammatory Response | activation            | activation of mast cells             | 1,71E-08 | CCL5, CCR2, CD48, CD300A, FCER1G, FCGR2A, FYB, ITGAM, LCP2, TLR7, TLR8 (includes EG:51311)                                                                                                                                                                                                                                                                                                                                                                           | 11 |  |
| Inflammatory Response | activation            | activation of cytotoxic T cells      | 8,02E-07 | CCR2, CD28, CD86, CD247, CTLA4, FAS, GZMA, GZMB, PRF1                                                                                                                                                                                                                                                                                                                                                                                                                | 9  |  |
| Inflammatory Response | inflammatory response | inflammatory response                | 6,76E-23 | AIF1, AOA, C3AR1, CASP1, CCL2, CCL4, CCL5, CCL19, CCL21, CCR2, CCR5, CD28, CFH, CORO1A, CSF1R, CX3CR1, CXCL6, CXCL9, CXCR4, CYBB, ETS1, FCER1A, FCER1G, FCGR2A, GNA13, HCK, HDAC9 (includes EG:9734), IGHG1, IL10RA, IL10RB, IL12RB1, ITGAL, ITGAM, ITGB2, ITGB6, LTF, LY75, LY96, LYN, LYZ, NFKB1, NLRP3, PIK3CD, PRKCB, PTGDR, PTGER4, PTGES, PTPRC, RAC2, RGS1, SELPLG, SERPINA3, SOCS3, STAT1, STAT4, TLR4, TLR7, TLR8 (includes EG:51311), TNFRSF1B, VAV1, XCL1 | 61 |  |
| Inflammatory Response | inflammatory response | inflammatory response of organism    | 6,80E-08 | AOAH, CASP1, CCL2, CCR5, FCER1A, FCER1G, FCGR2A, IGHG1, IL10RA, IL10RB, SELPLG, TLR4, TLR7, TLR8 (includes EG:51311), TNFRSF1B                                                                                                                                                                                                                                                                                                                                       | 15 |  |
| Inflammatory Response | cell movement         | cell movement of phagocytes          | 4,85E-16 | CASP1, CCL2, CCL4, CCL5, CCL21, CCR2, CCR5, CCR6, CD28, CD47, CFH, CORO1A, CSF1R, CX3CR1, CXCL6, CXCL9, FAS, FCER1G, FCGR2A, HCK, HGF, HIF1A, IL12RB1, ITGAL, ITGAM, ITGAX, ITGB2, PIK3CD, PTGDR, PTGES, RAC2, SELPLG, SOCS3, TLR4, TNFRSF1B, XCL1                                                                                                                                                                                                                   | 36 |  |
| Inflammatory Response | cell movement         | cell movement of neutrophils         | 2,82E-13 | CASP1, CCL2, CCL4, CCL5, CCL21, CCR2, CD28, CD47, CFH, CORO1A, CXCL6, FAS, FCER1G, FCGR2A, HCK, HGF, ITGAL, ITGAM, ITGAX, ITGB2, PIK3CD, PTGDR, RAC2, SELPLG, SOCS3, TLR4, TNFRSF1B, XCL1                                                                                                                                                                                                                                                                            | 28 |  |
| Inflammatory Response | cell movement         | cell movement of macrophages         | 6,26E-08 | CCL2, CCL4, CCL5, CCR2, CCR5, CCR6, CSF1R, CX3CR1, CXCL9, HGF, HIF1A, IL12RB1, ITGB2, PIK3CD, PTGES, RAC2                                                                                                                                                                                                                                                                                                                                                            | 16 |  |
| Inflammatory Response | cell movement         | cell movement of bone marrow cells   | 4,66E-07 | CCL2, CCL4, CD47, CXCL9, ITGAL, ITGAM, ITGAX, ITGB2, PIK3CD, PTGDR, TLR4                                                                                                                                                                                                                                                                                                                                                                                             | 11 |  |
| Inflammatory Response | degranulation         | degranulation of eukaryotic cells    | 3,78E-15 | BTK, C3AR1, CCL4, CD300A, CTLA4, FCER1A, FCER1G, FCGR2A, FCGR3B, HCK, ITGAM, ITGB2, ITK, KLRK1, LAT2, LAX1, LCP2, LYN, PIK3CD, PLD1, PLSR1, RAB27A, RAC2, VAV1                                                                                                                                                                                                                                                                                                       | 24 |  |
| Inflammatory Response | degranulation         | degranulation of mast cells          | 4,03E-13 | BTK, C3AR1, CD300A, CTLA4, FCER1A, FCER1G, HCK, ITK, LAT2, LAX1, LCP2, LYN, PIK3CD, PLD1, RAC2, VAV1                                                                                                                                                                                                                                                                                                                                                                 | 16 |  |
| Inflammatory Response | antibody response     | antibody response                    | 1,06E-14 | BTK, CCL2, CCL5, CCR2, CCR6, CD28, CTLA4, ICOS, IGHG1, LCP2, LTF, LY86, LYN, POU2AF1, PRDM1, PSMB10, PTPRC, SH2D1A, TLR4, TNFSF13B, VAV1                                                                                                                                                                                                                                                                                                                             | 21 |  |
| Inflammatory Response | antibody response     | antibody response of animal          | 3,47E-09 | BTK, CD28, CTLA4, ICOS, IGHG1, LYN, PRDM1, PTPRC, SH2D1A, TLR4, TNFSF13B, VAV1                                                                                                                                                                                                                                                                                                                                                                                       | 12 |  |
| Inflammatory Response | antibody response     | antibody response of mice            | 9,87E-07 | BTK, ICOS, LYN, PRDM1, PTPRC, SH2D1A, TLR4, TNFSF13B, VAV1                                                                                                                                                                                                                                                                                                                                                                                                           | 9  |  |
| Inflammatory Response | chemotaxis            | chemotaxis of leukocytes             | 2,49E-13 | CCL2, CCL4, CCL5, CCL19, CCL21, CCR2, CCR5, CD28, CORO1A, CX3CR1, CXCL6, CXCL9, CXCR4, FCER1G, FCGR2A, GNA13, HCK, IL12RB1, ITGAL, ITGAM, ITGB2, LYN, PIK3CD, PRKCB, PTGDR, PTPRC, RAC2, RGS1, SERPINA3, SOCS3, TLR4, XCL1                                                                                                                                                                                                                                           | 32 |  |
| Inflammatory Response | chemotaxis            | chemotaxis of mononuclear leukocytes | 1,60E-08 | CCL2, CCL4, CCL5, CCL19, CCL21, CCR2, CCR5, CXCL9, CXCR4, GNA13, ITGAL, PRKCB, PTGDR, RAC2, RGS1, SERPINA3, SOCS3, TLR4, XCL1                                                                                                                                                                                                                                                                                                                                        | 19 |  |
| Inflammatory Response | chemotaxis            | chemotaxis of lymphocytes            | 1,63E-08 | CCL2, CCL4, CCL5, CCL19, CCL21, CCR2, CCR5, CXCL9, CXCR4, GNA13, PTGDR, RAC2, RGS1, SOCS3, TLR4, XCL1                                                                                                                                                                                                                                                                                                                                                                | 16 |  |
| Inflammatory Response | chemotaxis            | chemotaxis of phagocytes             | 2,48E-08 | CCL2, CCL4, CCL5, CD28, CORO1A, CX3CR1, CXCL6, CXCL9, FCER1G, FCGR2A, HCK, IL12RB1, ITGAM, ITGB2, PIK3CD, RAC2, XCL1                                                                                                                                                                                                                                                                                                                                                 | 17 |  |
| Inflammatory Response | chemotaxis            | chemotaxis of myeloid cells          | 1,27E-06 | CCL2, CCL4, CCL5, CD28, CORO1A, CXCL6, CXCL9, FCER1G, FCGR2A, HCK, ITGAM, ITGB2, PTPRC, RAC2, XCL1                                                                                                                                                                                                                                                                                                                                                                   | 15 |  |
| Inflammatory Response | chemotaxis            | chemotaxis of neutrophils            | 1,41E-06 | CCL2, CCL4, CCL5, CD28, CORO1A, CXCL6, FCER1G, FCGR2A, HCK, ITGAM, ITGB2, RAC2, XCL1                                                                                                                                                                                                                                                                                                                                                                                 | 13 |  |
| Inflammatory Response | chemotaxis            | chemotaxis of B lymphocytes          | 1,68E-06 | CCL19, CCL21, CCR2, CXCL9, RAC2, RGS1, TLR4                                                                                                                                                                                                                                                                                                                                                                                                                          | 7  |  |

|                       |                   |                                    |          |                                                                                                                                                                                                                                                   |    |
|-----------------------|-------------------|------------------------------------|----------|---------------------------------------------------------------------------------------------------------------------------------------------------------------------------------------------------------------------------------------------------|----|
| Inflammatory Response | phagocytosis      | phagocytosis                       | 4,72E-13 | C1QA, CD47, CLEC7A, CORO1A, CSF2RB, FAS, FCER1G, FCGR1A, FCGR2A, FCGR3B, HCK, ICOS, IGHG1, IRF8, ITGAM, ITGAX, ITGB2, LY75, LYN, PRKCB, RAC2, SELPLG, TLR4, VAV1                                                                                  | 24 |
| Inflammatory Response | phagocytosis      | phagocytosis of cells              | 1,68E-11 | C1QA, CD47, CORO1A, CSF2RB, FAS, FCER1G, FCGR1A, FCGR2A, FCGR3B, HCK, IRF8, ITGAM, ITGAX, ITGB2, LY75, LYN, PRKCB, RAC2, SELPLG, TLR4, VAV1                                                                                                       | 21 |
| Inflammatory Response | phagocytosis      | phagocytosis of blood cells        | 2,67E-10 | CD47, CORO1A, CSF2RB, FAS, FCGR1A, FCGR2A, FCGR3B, HCK, IRF8, ITGAM, ITGB2, LYN, RAC2, SELPLG, TLR4                                                                                                                                               | 15 |
| Inflammatory Response | phagocytosis      | phagocytosis of myeloid cells      | 6,32E-10 | CD47, CORO1A, CSF2RB, FCGR2A, FCGR3B, IRF8, ITGAM, ITGB2, SELPLG, TLR4                                                                                                                                                                            | 10 |
| Inflammatory Response | phagocytosis      | phagocytosis of eukaryotic cells   | 1,94E-09 | CD47, CORO1A, CSF2RB, FAS, FCGR1A, FCGR2A, FCGR3B, HCK, IRF8, ITGAM, ITGB2, LYN, PRKCB, RAC2, SELPLG, TLR4, VAV1                                                                                                                                  | 17 |
| Inflammatory Response | phagocytosis      | phagocytosis of neutrophils        | 4,30E-09 | CD47, CORO1A, CSF2RB, FCGR2A, FCGR3B, ITGAM, ITGB2, SELPLG, TLR4                                                                                                                                                                                  | 9  |
| Inflammatory Response | phagocytosis      | phagocytosis of leukocytes         | 1,66E-07 | CD47, CORO1A, CSF2RB, FAS, FCGR2A, FCGR3B, IRF8, ITGAM, ITGB2, SELPLG, TLR4                                                                                                                                                                       | 11 |
| Inflammatory Response | phagocytosis      | phagocytosis of red blood cells    | 4,43E-07 | FCGR1A, FCGR2A, HCK, ITGAM, ITGB2, LYN, RAC2                                                                                                                                                                                                      | 7  |
| Inflammatory Response | phagocytosis      | phagocytosis of phagocytes         | 6,53E-07 | CD47, CORO1A, CSF2RB, FAS, FCGR2A, FCGR3B, ITGAM, ITGB2, SELPLG, TLR4                                                                                                                                                                             | 10 |
| Inflammatory Response | respiratory burst | respiratory burst                  | 7,54E-12 | CCL2, CYBB, FCER1A, FCER1G, HCK, IGHA1, IRF8, ITGAL, ITGAM, ITGAX, ITGB2, LTF, LYN, NCF2, PTPRC, TYROBP                                                                                                                                           | 16 |
| Inflammatory Response | respiratory burst | respiratory burst of leukocytes    | 1,15E-10 | CCL2, FCER1A, FCER1G, HCK, IGHA1, IRF8, ITGAL, ITGAM, ITGAX, ITGB2, LYN, PTPRC, TYROBP                                                                                                                                                            | 13 |
| Inflammatory Response | respiratory burst | respiratory burst of myeloid cells | 2,09E-09 | FCER1A, FCER1G, HCK, IGHA1, ITGAL, ITGAM, ITGAX, ITGB2, LYN, PTPRC, TYROBP                                                                                                                                                                        | 11 |
| Inflammatory Response | respiratory burst | respiratory burst of phagocytes    | 2,09E-09 | FCER1A, FCER1G, HCK, IGHA1, IRF8, ITGAL, ITGAM, ITGAX, ITGB2, LYN, TYROBP                                                                                                                                                                         | 11 |
| Inflammatory Response | respiratory burst | respiratory burst of neutrophils   | 7,59E-09 | FCER1A, FCER1G, HCK, IGHA1, ITGAL, ITGAM, ITGAX, ITGB2, LYN, TYROBP                                                                                                                                                                               | 10 |
| Inflammatory Response | quantity          | quantity of phagocytes             | 1,16E-11 | AHR, C1QA, CCL2, CCR2, CCR6, CD1D, CFH, CSF1R, CTSS, CXCR6 (includes EG:10663), FAS, FCGR1A, IL12RB1, ITGB2, ITGB6, JAK3, PLSCR1, PTGES, RAC2, SELPLG, SOCS3, STAT4, TLR4, TNFRSF1B                                                               | 24 |
| Inflammatory Response | quantity          | quantity of neutrophils            | 3,31E-08 | AHR, C1QA, CD1D, CFH, FAS, FCGR1A, ITGB2, JAK3, PLSCR1, RAC2, SELPLG, SOCS3, TLR4, TNFRSF1B                                                                                                                                                       | 14 |
| Inflammatory Response | quantity          | quantity of macrophages            | 1,07E-06 | CCL2, CCR2, CCR6, CSF1R, CTSS, CXCR6 (includes EG:10663), FAS, IL12RB1, ITGB6, PTGES, SELPLG, SOCS3, STAT4, TLR4                                                                                                                                  | 14 |
| Inflammatory Response | accumulation      | accumulation of leukocytes         | 1,48E-11 | CCL2, CCL5, CCL21, CCR2, CCR5, CD28, CD86, CD1D, CTLA4, CX3CR1, CXCL9, CYBB, FAS, ICOS, IL10RA, IL2RG, ITGAL, ITGAM, ITGAX, ITGB2, RUNX3, SELPLG, SH2D2A, TLR4                                                                                    | 24 |
| Inflammatory Response | accumulation      | accumulation of lymphocytes        | 2,17E-10 | CCL5, CCL21, CCR5, CD28, CD86, CD1D, CTLA4, FAS, ICOS, IL10RA, IL2RG, ITGAL, ITGB2, RUNX3, SH2D2A                                                                                                                                                 | 15 |
| Inflammatory Response | accumulation      | accumulation of T lymphocytes      | 4,33E-10 | CCL5, CCL21, CCR5, CD28, CD86, CTLA4, FAS, ICOS, IL10RA, IL2RG, ITGAL, RUNX3, SH2D2A                                                                                                                                                              | 13 |
| Inflammatory Response | accumulation      | accumulation of macrophages        | 8,02E-07 | CCL2, CCL5, CCR2, CD28, CX3CR1, FAS, ITGAM, ITGAX, TLR4                                                                                                                                                                                           | 9  |
| Inflammatory Response | inflammation      | inflammation                       | 4,49E-11 | C3AR1, CASP1, CCL2, CCL4, CCL5, CCR2, CCR5, CD47, CD86, CTLA4, CTSS, FAS, FCER1A, FCER1G, FCGR1A, FCGR2A, HGF, ICOS, IGHG1, IL2RG, IL7R, ITGB2, ITK, NLRP3, PRF1, PTGER4, PTPRC, STAT1, STAT4, TLR4, TLR8 (includes EG:51311), TNFRSF1B, TNFSF13B | 33 |
| Inflammatory Response | inflammation      | inflammation of organ              | 1,90E-08 | CASP1, CCL4, CCR2, CCR5, CD47, CTLA4, CTSS, FAS, FCGR2A, ICOS, IGHG1, ITGB2, ITK, NLRP3, PRF1, STAT1, STAT4, TLR4, TLR8 (includes EG:51311), TNFRSF1B, TNFSF13B                                                                                   | 21 |
| Inflammatory Response | inflammation      | inflammation                       | 7,78E-07 | CASP1, CCL2, CCL5, FAS, FCER1G, IL2RG, IL7R, ITGB2, NLRP3, PTGER4,                                                                                                                                                                                | 14 |

|                       |                                                     |                                                               |          |                                                                                                                         |    |
|-----------------------|-----------------------------------------------------|---------------------------------------------------------------|----------|-------------------------------------------------------------------------------------------------------------------------|----|
| Response              | mation                                              | of organism                                                   |          | STAT1, STAT4, TLR4, TNFRSF1B                                                                                            |    |
| Inflammatory Response | antibody-dependent cell-mediated cytotoxic reaction | antibody-dependent cell-mediated cytotoxic reaction           | 5,78E-10 | CD247, FCER1A, FCGR1A, FCGR2A, IGHG1, IGKC, VAV1                                                                        | 7  |
| Inflammatory Response | antibody-dependent cell-mediated cytotoxic reaction | antibody-dependent cell-mediated reaction of eukaryotic cells | 1,76E-07 | CD247, FCER1A, FCGR2A, IGKC, VAV1                                                                                       | 5  |
| Inflammatory Response | recruitment                                         | recruitment of phagocytes                                     | 1,94E-09 | AHR, C3AR1, CCL2, CCL4, CCL5, CCL19, CCR2, CCR5, CD28, CD8A, CX3CR1, ETS1, ITGAM, ITGB2, LYZ, PIK3CD, TLR4              | 17 |
| Inflammatory Response | recruitment                                         | recruitment of neutrophils                                    | 2,45E-08 | AHR, C3AR1, CCL2, CCL4, CCL5, CCL19, CCR2, CD28, CD8A, CX3CR1, ITGAM, LYZ, PIK3CD, TLR4                                 | 14 |
| Inflammatory Response | recruitment                                         | recruitment of macrophages                                    | 3,06E-07 | C3AR1, CCL2, CCL4, CCR2, CCR5, CD8A, CX3CR1, ETS1, ITGB2, TLR4                                                          | 10 |
| Inflammatory Response | binding                                             | binding of phagocytes                                         | 2,76E-09 | CD2, CD69, CLEC10A, FCGR1A, FCGR2A, FCGR3B, HCK, ITGAL, ITGAM, ITGB2, LYN, PTPRC, SELPLG, TLR4                          | 14 |
| Inflammatory Response | migration                                           | migration of phagocytes                                       | 4,42E-09 | CCL2, CCL5, CD47, CSF1R, CXCL6, FAS, HCK, ITGAL, ITGAM, ITGAX, ITGB2, LUM, MMP7, PIK3CD, PTGDR, RAC2, TLR4              | 17 |
| Inflammatory Response | migration                                           | migration of neutrophils                                      | 3,31E-08 | CCL5, CD47, CXCL6, FAS, HCK, ITGAL, ITGAM, ITGAX, ITGB2, LUM, MMP7, PIK3CD, PTGDR, TLR4                                 | 14 |
| Inflammatory Response | antiviral response                                  | antiviral response                                            | 6,41E-09 | APOBEC3G, CCL4, CCL5, CCL19, CXCR4, IFI44, IRF1, ISG20, MX2, SOCS3, STAT1, TLR7, TLR8 (includes EG:51311), TRIM22, VAV1 | 15 |
| Inflammatory Response | antiviral response                                  | antiviral response of organism                                | 1,95E-07 | CCL4, CCL5, CCL19, CXCR4, IFI44, ISG20, MX2, STAT1, TLR7, TLR8 (includes EG:51311), TRIM22, VAV1                        | 12 |
| Inflammatory Response | infiltration                                        | infiltration by neutrophils                                   | 9,60E-09 | CASP1, CCL4, CCL21, CCR2, CFH, FAS, FCER1G, HGF, ITGAL, ITGAM, ITGB2, RAC2, SOCS3, TLR4, TNFRSF1B, XCL1                 | 16 |
| Inflammatory Response | adhesion                                            | adhesion of neutrophils                                       | 4,19E-08 | CORO1A, ITGAL, ITGAM, ITGAX, ITGB2, LCP1, LYN, PIK3CD, SELPLG, TLR4, VAV1                                               | 11 |
| Inflammatory Response | chemoattraction                                     | chemoattraction of antigen presenting cells                   | 1,29E-07 | CCL2, CCL4, CCL5, CCL19, CXCL9, IL12RB1, TLR4                                                                           | 7  |
| Inflammatory Response | chemoattraction                                     | chemoattraction of macrophages                                | 1,02E-06 | CCL2, CCL4, CCL5, CXCL9, IL12RB1                                                                                        | 5  |
| Inflammatory Response | processing                                          | processing of antigen                                         | 4,43E-07 | ERAP2, FCER1G, HLA-DMB, HLA-DOA, HLA-DQA1, HLA-DQB1, HLA-DRA                                                            | 7  |
| Inflammatory Response | CD4 T-cell response                                 | CD4 T-cell response                                           | 6,40E-07 | CASP1, CCR5, CD86, CLEC7A, CTLA4, ICOS, IRF1, ITK, STAT4, TBX21, TLR4                                                   | 11 |
| Inflammatory Response | transmigration                                      | transmigration of granulocytes                                | 6,48E-07 | CD47, CXCL9, ITGAL, ITGAM, ITGAX, ITGB2, PIK3CD, PTGDR, TLR4                                                            | 9  |
| Inflammatory Response | transmigration                                      | transmigration of neutrophils                                 | 7,77E-07 | CD47, ITGAL, ITGAM, ITGAX, ITGB2, PIK3CD, PTGDR, TLR4                                                                   | 8  |

|                      |                       |                                                 |          |                                                                                                                                                                                                                                                                                                                                                                                                                                                                                                                                                                                                                                                                                                                                                                                                                                                                                         |     |
|----------------------|-----------------------|-------------------------------------------------|----------|-----------------------------------------------------------------------------------------------------------------------------------------------------------------------------------------------------------------------------------------------------------------------------------------------------------------------------------------------------------------------------------------------------------------------------------------------------------------------------------------------------------------------------------------------------------------------------------------------------------------------------------------------------------------------------------------------------------------------------------------------------------------------------------------------------------------------------------------------------------------------------------------|-----|
| Cellular Development | developmental process | developmental process of leukocytes             | 1,52E-56 | AHR, APAF1, BCL11B, BCL2A1, BTK, C1QC, CASP1, CBL, CCL2, CCL4, CCL5, CCL19, CCL21, CCR2, CCR5, CCR6, CD2, CD28, CD47, CD69, CD86, CD244, CD247, CD1D, CD300A, CD3D, CD3E, CD3G, CD8A, CD8B, CHEK2, CIITA, CLEC10A, CSF1R, CSF2RB, CTLA4, CXCR4, DCK, DOCK2, DUSP5, EOMES, ETS1, FAS, FCER1G, FCGR2A, GIMAP5, GZMA, GZMB, HDAC9 (includes EG:9734), HELLS, HGF, HIF1A, HLA-DOA, HLA-DQA1, HLA-DQB1, ICOS, IDO1, IFI16, IGHG1, IGHM, IKZF1, IL10RA, IL12RB1, IL2RB, IL2RG, IL7R, IRF1, IRF4, IRF8, ITGAL, ITGAM, ITGB2, ITGB6, ITK, JAK3, KLRD1, LAT2, LAX1, LCK, LCP2, LEF1, LYN, MAP4K1, MLLT3, PIK3CD, PLSCR1, POU2AF1, PRDM1, PRF1, PSMB9, PTPN22, PTPRC, RAC2, RASSF5, RGS10, RUNX1, RUNX2, RUNX3, SH2D1A, SH2D2A, SIT1, SOCS3, SRGN, STAT1, STAT4, TBX21, TLR4, TLR7, TLR8 (includes EG:51311), TNFRSF1B, TNFSF13B, TOX, TRA@, TRAT1, TYROBP, VAV1, XCL1                            | 117 |
| Cellular Development | developmental process | developmental process of blood cells            | 8,46E-55 | AHR, APAF1, BCL11B, BCL2A1, BTK, C1QC, CASP1, CBL, CCL2, CCL4, CCL5, CCL19, CCL21, CCND2, CCR2, CCR5, CCR6, CD2, CD28, CD47, CD69, CD86, CD163, CD244, CD247, CD1D, CD300A, CD3D, CD3E, CD3G, CD8A, CD8B, CHEK2, CIITA, CLEC10A, CSF1R, CSF2RB, CTLA4, CXCR4, DCK, DOCK2, DUSP5, EOMES, ETS1, FAS, FCER1G, FCGR2A, FLI1, GIMAP5, GZMA, GZMB, HCLS1, HDAC9 (includes EG:9734), HELLS, HGF, HIF1A, HLA-DOA, HLA-DQA1, HLA-DQB1, ICOS, IDO1, IFI16, IGHG1, IGHM, IKZF1, IL10RA, IL12RB1, IL2RB, IL2RG, IL7R, IRF1, IRF4, IRF8, ITGAL, ITGAM, ITGB2, ITGB6, ITK, JAK3, KLRD1, LAT2, LAX1, LCK, LCP2, LEF1, LYN, MAP4K1, MLLT3, PIK3CD, PLSCR1, POU2AF1, PRDM1, PRF1, PSMB9, PTPN22, PTPRC, RAC2, RASSF5, RGS10, RUNX1, RUNX2, RUNX3, SH2D1A, SH2D2A, SIT1, SOCS3, SRGN, STAT1, STAT4, TBX21, TLR4, TLR7, TLR8 (includes EG:51311), TNFRSF1B, TNFSF13B, TOX, TRA@, TRAT1, TYROBP, VAV1, XCL1 | 121 |
| Cellular Development | developmental process | developmental process of mononuclear leukocytes | 7,47E-53 | AHR, APAF1, BCL11B, BCL2A1, BTK, CASP1, CBL, CCL2, CCL4, CCL5, CCL19, CCR5, CCR6, CD2, CD28, CD47, CD69, CD86, CD244, CD247, CD1D, CD3D, CD3E, CD3G, CD8A, CD8B, CHEK2, CIITA, CLEC10A, CSF1R, CTLA4, CXCR4, DCK, DOCK2, DUSP5, EOMES, ETS1, FAS, FCER1G, FCGR2A, GIMAP5, GZMA, GZMB, HDAC9 (includes EG:9734), HELLS, HGF, HIF1A, HLA-DOA, HLA-DQA1, HLA-DQB1, ICOS, IDO1, IFI16, IGHG1, IGHM, IKZF1, IL10RA, IL12RB1, IL2RB, IL2RG, IL7R, IRF1, IRF4, IRF8, ITGAL, ITGAM, ITGB2, ITK, JAK3, KLRD1, LAT2, LAX1, LCK, LCP2, LEF1, LYN, MAP4K1, PIK3CD, POU2AF1, PRDM1, PRF1, PSMB9, PTPN22, PTPRC, RAC2, RASSF5, RUNX1, RUNX2, RUNX3, SH2D1A, SH2D2A, SIT1, SOCS3, SRGN, STAT1, STAT4, TBX21, TLR4, TLR7, TNFRSF1B, TNFSF13B, TOX, TRA@, TRAT1, VAV1, XCL1                                                                                                                              | 106 |
| Cellular Development | developmental process | developmental process of lymphocytes            | 4,66E-50 | AHR, APAF1, BCL11B, BCL2A1, BTK, CASP1, CBL, CCL4, CCL5, CCL19, CCR5, CCR6, CD2, CD28, CD47, CD69, CD86, CD244, CD247, CD1D, CD3D, CD3E, CD3G, CD8A, CD8B, CHEK2, CIITA, CLEC10A, CTLA4, CXCR4, DCK, DOCK2, DUSP5, EOMES, ETS1, FAS, FCER1G, FCGR2A, GIMAP5, GZMA, GZMB, HDAC9 (includes EG:9734), HELLS, HIF1A, HLA-DOA, HLA-DQA1, HLA-DQB1, ICOS, IDO1, IGHG1, IGHM, IKZF1, IL10RA, IL12RB1, IL2RB, IL2RG, IL7R, IRF1, IRF4, IRF8, ITGAL, ITGB2, ITK, JAK3, KLRD1, LAT2, LAX1, LCK, LCP2, LEF1, LYN, MAP4K1, PIK3CD, POU2AF1, PRDM1, PRF1, PSMB9, PTPN22, PTPRC, RAC2, RASSF5, RUNX1, RUNX2, RUNX3, SH2D1A, SH2D2A, SIT1, SOCS3, SRGN, STAT1, STAT4, TBX21, TLR4, TLR7, TNFRSF1B, TNFSF13B, TOX, TRA@, TRAT1, VAV1, XCL1                                                                                                                                                              | 101 |
| Cellular Development | developmental process | developmental process of T lymphocytes          | 1,51E-46 | AHR, APAF1, BCL11B, BCL2A1, CASP1, CBL, CCL4, CCL5, CCL19, CCR5, CCR6, CD2, CD28, CD47, CD86, CD244, CD247, CD1D, CD3D, CD3E, CD3G, CD8A, CD8B, CHEK2, CIITA, CLEC10A, CTLA4, CXCR4, DOCK2, EOMES, ETS1, FAS, FCER1G, FCGR2A, GIMAP5, GZMA, GZMB, HLA-DOA, HLA-DQA1, HLA-DQB1, ICOS, IDO1, IGHG1, IGHM, IKZF1, IL10RA, IL12RB1, IL2RB, IL2RG, IL7R, IRF1, IRF4, IRF8, ITGAL, ITGB2, ITK, JAK3, KLRD1, LAT2, LAX1, LCK, LCP2, LEF1, MAP4K1, PIK3CD, PRDM1, PRF1, PSMB9, PTPN22, PTPRC, RAC2, RASSF5, RUNX1, RUNX2, RUNX3, SH2D1A, SH2D2A, SIT1, SOCS3, SRGN, STAT1, STAT4, TBX21, TLR4, TNFRSF1B, TNFSF13B, TOX, TRA@, TRAT1, VAV1, XCL1                                                                                                                                                                                                                                                 | 91  |
| Cellular Development | developmental process | developmental process of thymocytes             | 1,76E-18 | APAF1, CD2, CD28, CD86, CD247, CD3D, CD3E, CD3G, CD8B, CXCR4, ETS1, IKZF1, IL2RB, IL2RG, IL7R, IRF1, LAT2, LAX1, LCK, LCP2, PTPRC, RUNX1, SIT1, TOX, TRA@, TRAT1                                                                                                                                                                                                                                                                                                                                                                                                                                                                                                                                                                                                                                                                                                                        | 26  |
| Cellular             | developmental         | developmental                                   | 1,85E-16 | AHR, CASP1, CBL, CD28, CD86, CTLA4, ETS1, ICOS, IGHG1, IL12RB1,                                                                                                                                                                                                                                                                                                                                                                                                                                                                                                                                                                                                                                                                                                                                                                                                                         | 27  |

|                      |                                                       |          |  |                                                                                                                                                                                                                                                                                                                                                                                                                                                                                                                                                                                                                                                           |    |
|----------------------|-------------------------------------------------------|----------|--|-----------------------------------------------------------------------------------------------------------------------------------------------------------------------------------------------------------------------------------------------------------------------------------------------------------------------------------------------------------------------------------------------------------------------------------------------------------------------------------------------------------------------------------------------------------------------------------------------------------------------------------------------------------|----|
| Development          | developmental process of helper T lymphocytes         |          |  | IL2RB, IRF1, IRF8, ITGAL, ITGB2, ITK, JAK3, LCP2, PIK3CD, RUNX1, SH2D1A, SOCS3, STAT1, STAT4, TBX21, TNFSF13B, VAV1                                                                                                                                                                                                                                                                                                                                                                                                                                                                                                                                       |    |
| Cellular Development | developmental process of Th2 cells                    | 3,38E-15 |  | CBL, CD28, CD86, CTLA4, ICOS, IGHG1, IL12RB1, IRF1, ITK, JAK3, LCP2, PIK3CD, RUNX1, SH2D1A, SOCS3, STAT1, STAT4, TBX21, VAV1                                                                                                                                                                                                                                                                                                                                                                                                                                                                                                                              | 19 |
| Cellular Development | developmental process of antigen presenting cells     | 1,02E-12 |  | C1QC, CCL5, CCL19, CCL21, CCR2, CD47, CSF1R, CSF2RB, DUSP5, FAS, GIMAP5, HGF, IKZF1, IRF1, IRF4, IRF8, ITGB6, LYN, PRDM1, RGS10, RUNX3, SOCS3, STAT1, TLR4, TLR7, TLR8 (includes EG:51311), TYROBP                                                                                                                                                                                                                                                                                                                                                                                                                                                        | 27 |
| Cellular Development | developmental process of B lymphocytes                | 1,77E-11 |  | AHR, BTK, CBL, CD69, CXCR4, DCK, DUSP5, HDAC9 (includes EG:9734), HIF1A, ICOS, IGHM, IKZF1, IL2RB, IL2RG, IL7R, IRF4, JAK3, LYN, PIK3CD, POU2AF1, PRDM1, PTPRC, TLR4, TLR7, TNFSF13B, VAV1                                                                                                                                                                                                                                                                                                                                                                                                                                                                | 26 |
| Cellular Development | developmental process of Th1 cells                    | 1,01E-10 |  | CASP1, CBL, CD86, CTLA4, ICOS, IL12RB1, IRF1, IRF8, ITGAL, ITGB2, JAK3, LCP2, PIK3CD, STAT1, STAT4, TBX21                                                                                                                                                                                                                                                                                                                                                                                                                                                                                                                                                 | 16 |
| Cellular Development | developmental process of dendritic cells              | 9,17E-10 |  | CCL5, CCL19, CCL21, CCR2, CSF1R, FAS, GIMAP5, IKZF1, IRF1, IRF4, IRF8, ITGB6, LYN, RUNX3, STAT1, TLR4, TLR7, TLR8 (includes EG:51311), TYROBP                                                                                                                                                                                                                                                                                                                                                                                                                                                                                                             | 19 |
| Cellular Development | arrest in developmental process of blood cells        | 5,54E-09 |  | BTK, CBL, CD3D, CXCR4, HIF1A, IRF8, LCK, LCP2, PTPRC, RUNX1                                                                                                                                                                                                                                                                                                                                                                                                                                                                                                                                                                                               | 10 |
| Cellular Development | arrest in developmental process of leukocytes         | 9,44E-09 |  | BTK, CBL, CD3D, CXCR4, HIF1A, IRF8, LCK, LCP2, RUNX1                                                                                                                                                                                                                                                                                                                                                                                                                                                                                                                                                                                                      | 9  |
| Cellular Development | developmental process of gamma-delta T lymphocytes    | 1,52E-08 |  | CD3D, CD3G, GIMAP5, IL2RG, JAK3, LCK, PTPRC                                                                                                                                                                                                                                                                                                                                                                                                                                                                                                                                                                                                               | 7  |
| Cellular Development | developmental process of natural killer cells         | 1,02E-07 |  | CD2, CD86, CD1D, EOMES, FAS, FCGR2A, IKZF1, IRF1, ITGAL, JAK3, KLRD1, TBX21                                                                                                                                                                                                                                                                                                                                                                                                                                                                                                                                                                               | 12 |
| Cellular Development | arrest in developmental process of lymphocytes        | 3,02E-07 |  | BTK, CBL, CD3D, CXCR4, HIF1A, LCK, LCP2                                                                                                                                                                                                                                                                                                                                                                                                                                                                                                                                                                                                                   | 7  |
| Cellular Development | developmental process of osteoclasts                  | 3,53E-07 |  | CCL2, CCL5, CD47, CD300LF, CSF1R, FCER1G, FHL2, IGHG1, PTGER4, RGS10, SOCS3, STAT1, TLR4, TYROBP                                                                                                                                                                                                                                                                                                                                                                                                                                                                                                                                                          | 14 |
| Cellular Development | developmental process of natural killer T lymphocytes | 4,43E-07 |  | CD1D, CTLA4, ETS1, IKZF1, ITK, SH2D1A, TBX21                                                                                                                                                                                                                                                                                                                                                                                                                                                                                                                                                                                                              | 7  |
| Cellular Development | development of lymphocytes                            | 3,56E-48 |  | AHR, APAF1, BCL11B, BCL2A1, BTK, CASP1, CBL, CCL4, CCL5, CCL19, CCR5, CD2, CD28, CD47, CD69, CD86, CD247, CD1D, CD3D, CD3E, CD3G, CD8A, CD8B, CHEK2, CIITA, CLEC10A, CTLA4, CXCR4, DCK, DOCK2, EOMES, ETS1, FAS, FCER1G, FCGR2A, GIMAP5, GZMA, GZMB, HIF1A, HLA-DOA, HLA-DQA1, HLA-DQB1, ICOS, IDO1, IGHG1, IGHM, IKZF1, IL10RA, IL12RB1, IL2RB, IL2RG, IL7R, IRF1, IRF4, IRF8, ITGAL, ITGB2, ITK, JAK3, KLRD1, LAT2, LAX1, LCK, LCP2, LEF1, LYN, MAP4K1, PIK3CD, POU2AF1, PRDM1, PRF1, PSMB9, PTPN22, PTPRC, RAC2, RASSF5, RUNX1, RUNX2, RUNX3, SH2D1A, SH2D2A, SIT1, SOCS3, STAT1, STAT4, TBX21, TLR4, TNFRSF1B, TNFSF13B, TOX, TRA@, TRAT1, VAV1, XCL1 | 94 |
| Cellular Development | development of leukocytes                             | 7,69E-48 |  | AHR, APAF1, BCL11B, BCL2A1, BTK, CASP1, CBL, CCL4, CCL5, CCL19, CCR5, CD2, CD28, CD47, CD69, CD86, CD247, CD1D, CD3D, CD3E, CD3G, CD8A, CD8B, CHEK2, CIITA, CLEC10A, CSF1R, CTLA4, CXCR4, DCK, DOCK2,                                                                                                                                                                                                                                                                                                                                                                                                                                                     | 95 |

|                      |                 |                                          |          |                                                                                                                                                                                                                                                                                                                                                                                                                                                                                                                                                                                                                                                                                                                                                                                                                 |     |
|----------------------|-----------------|------------------------------------------|----------|-----------------------------------------------------------------------------------------------------------------------------------------------------------------------------------------------------------------------------------------------------------------------------------------------------------------------------------------------------------------------------------------------------------------------------------------------------------------------------------------------------------------------------------------------------------------------------------------------------------------------------------------------------------------------------------------------------------------------------------------------------------------------------------------------------------------|-----|
| Cellular Development | development     | T cell development                       | 2,65E-45 | EOMES, ETS1, FAS, FCER1G, FCGR2A, GIMAP5, GZMA, GZMB, HIF1A, HLA-DOA, HLA-DQA1, HLA-DQB1, ICOS, IDO1, IGHG1, IGHM, IKZF1, IL10RA, IL12RB1, IL2RB, IL2RG, IL7R, IRF1, IRF4, IRF8, ITGAL, ITGB2, ITK, JAK3, KLRD1, LAT2, LAX1, LCK, LCP2, LEF1, LYN, MAP4K1, PIK3CD, POU2AF1, PRDM1, PRF1, PSMB9, PTPN22, PTPRC, RAC2, RASSF5, RUNX1, RUNX2, RUNX3, SH2D1A, SH2D2A, SIT1, SOCS3, STAT1, STAT4, TBX21, TLR4, TNFRSF1B, TNFSF13B, TOX, TRA@, TRAT1, VAV1, XCL1                                                                                                                                                                                                                                                                                                                                                      | 88  |
| Cellular Development | development     | development of cells                     | 3,91E-32 | AHR, APAF1, BASP1, BCL11B, BCL2A1, BMP8B, BTK, CASP1, CBL, CCL2, CCL4, CCL5, CCL19, CCR2, CCR5, CD2, CD28, CD47, CD69, CD86, CD247, CD1D, CD3D, CD3E, CD3G, CD8A, CD8B, CDC42SE2, CHEK2, CIITA, CLEC10A, CORO1A, CSF1R, CTLA4, CXCR4, DCK, DOCK2, EOMES, ETS1, FAS, FCER1G, FCGR2A, GIMAP5, GNA13, GZMA, GZMB, HCK, HGF, HIF1A, HLA-DOA, HLA-DQA1, HLA-DQB1, ICOS, IDO1, IFI16, IGHG1, IGHM, IKZF1, IL10RA, IL12RB1, IL2RB, IL2RG, IL7R, IRF1, IRF4, IRF8, ITGAL, ITGAM, ITGB2, ITK, JAK3, KLRD1, KLRK1, LAT2, LAX1, LCK, LCP2, LEF1, LYN, MAP4K1, PARVG, PIK3CD, PLD1, POU2AF1, PRDM1, PRF1, PSMB9, PTPN22, PTPRA, PTPRC, RAC2, RASSF5, RBL1, RUNX1, RUNX2, RUNX3, SERPINA3, SH2D1A, SH2D2A, SIT1, SOCS3, STAT1, STAT4, STK4, TBX21, TLR4, TNC, TNFRSF1B, TNFSF13B, TOX, TRA@, TRAT1, TYROBP, VAV1, VCAN, XCL1 | 116 |
| Cellular Development | development     | development of thymocytes                | 4,63E-12 | CD3D, CD3E, CD3G, CXCR4, ETS1, IL2RB, IL2RG, IL7R, IRF1, LAT2, LAX1, LCP2, PTPRC, SIT1, TRA@, TRAT1                                                                                                                                                                                                                                                                                                                                                                                                                                                                                                                                                                                                                                                                                                             | 16  |
| Cellular Development | development     | development of helper T lymphocytes      | 8,61E-11 | AHR, CASP1, CD28, CD86, ICOS, IL12RB1, IRF1, ITGB2, ITK, SOCS3, STAT1, STAT4, TBX21                                                                                                                                                                                                                                                                                                                                                                                                                                                                                                                                                                                                                                                                                                                             | 13  |
| Cellular Development | development     | development of B lymphocytes             | 3,12E-10 | BTK, CBL, CD69, CXCR4, DCK, HIF1A, IGHM, IL2RG, IL7R, JAK3, LYN, PIK3CD, POU2AF1, PRDM1, TNFSF13B, VAV1                                                                                                                                                                                                                                                                                                                                                                                                                                                                                                                                                                                                                                                                                                         | 16  |
| Cellular Development | development     | arrest in development of lymphocytes     | 1,73E-07 | BTK, CBL, CD3D, CXCR4, LCK, LCP2                                                                                                                                                                                                                                                                                                                                                                                                                                                                                                                                                                                                                                                                                                                                                                                | 6   |
| Cellular Development | development     | arrest in development of cells           | 3,02E-07 | BTK, CBL, CD3D, CXCR4, LCK, LCP2, TYROBP                                                                                                                                                                                                                                                                                                                                                                                                                                                                                                                                                                                                                                                                                                                                                                        | 7   |
| Cellular Development | development     | NK cell development                      | 6,40E-07 | CD2, CD1D, EOMES, FAS, FCGR2A, IKZF1, IRF1, ITGAL, JAK3, KLRD1, TBX21                                                                                                                                                                                                                                                                                                                                                                                                                                                                                                                                                                                                                                                                                                                                           | 11  |
| Cellular Development | development     | arrest in development of T lymphocytes   | 1,02E-06 | CBL, CD3D, CXCR4, LCK, LCP2                                                                                                                                                                                                                                                                                                                                                                                                                                                                                                                                                                                                                                                                                                                                                                                     | 5   |
| Cellular Development | development     | development of gamma-delta T lymphocytes | 1,76E-06 | CD3D, CD3G, IL2RG, JAK3                                                                                                                                                                                                                                                                                                                                                                                                                                                                                                                                                                                                                                                                                                                                                                                         | 4   |
| Cellular Development | differentiation | differentiation of leukocytes            | 2,18E-37 | AHR, APAF1, BCL2A1, C1QC, CCL2, CCL19, CD2, CD28, CD47, CD86, CD1D, CD300A, CD3D, CD3E, CD8A, CD8B, CSF1R, CSF2RB, CTLA4, CXCR4, DOCK2, DUSP5, ETS1, FAS, GIMAP5, HDAC9 (includes EG:9734), HELLS, HGF, HLA-DOA, HLA-DQA1, ICOS, IFI16, IGHG1, IGHM, IKZF1, IL12RB1, IL2RB, IL2RG, IL7R, IRF1, IRF4, IRF8, ITGAL, ITGAM, ITGB2, ITGB6, ITK, JAK3, LCK, LCP2, LEF1, LYN, PIK3CD, PLSCR1, POU2AF1, PRDM1, PTPN22, PTPRC, RASSF5, RGS10, RUNX1, RUNX2, SH2D1A, SIT1, SOCS3, STAT1, STAT4, TBX21, TLR4, TLR7, TNFSF13B, TOX, TRA@, TRAT1, VAV1                                                                                                                                                                                                                                                                      | 75  |
| Cellular Development | differentiation | differentiation                          | 1,65E-36 | AHR, APAF1, BCL2A1, C1QC, CCL2, CCL19, CD2, CD28, CD47, CD86,                                                                                                                                                                                                                                                                                                                                                                                                                                                                                                                                                                                                                                                                                                                                                   | 79  |



|                      |                  |                                             |          |                                                                                                                                                                                                                                                                                                                                                                                                                                                                                                                                                                                                                                                                                                                                            |     |
|----------------------|------------------|---------------------------------------------|----------|--------------------------------------------------------------------------------------------------------------------------------------------------------------------------------------------------------------------------------------------------------------------------------------------------------------------------------------------------------------------------------------------------------------------------------------------------------------------------------------------------------------------------------------------------------------------------------------------------------------------------------------------------------------------------------------------------------------------------------------------|-----|
| Development          | ntiation         | of blood cells                              |          | CD1D, CD300A, CD3D, CD3E, CD8A, CD8B, CSF1R, CSF2RB, CTLA4, CXCR4, DOCK2, DUSP5, ETS1, FAS, FLI1, GIMAP5, HCLS1, HDAC9 (includes EG:9734), HELLS, HGF, HIF1A, HLA-DOA, HLA-DQA1, ICOS, IFI16, IGHG1, IGHM, IKZF1, IL12RB1, IL2RB, IL2RG, IL7R, IRF1, IRF4, IRF8, ITGAL, ITGAM, ITGB2, ITGB6, ITK, JAK3, LCK, LCP2, LEF1, LYN, MAP4K1, PIK3CD, PLSCR1, POU2AF1, PRDM1, PTPN22, PTPRC, RASSF5, RGS10, RUNX1, RUNX2, SH2D1A, SIT1, SOCS3, STAT1, STAT4, TBX21, TLR4, TLR7, TNFSF13B, TOX, TRA@, TRAT1, VAV1                                                                                                                                                                                                                                   |     |
| Cellular Development | differe ntiation | differentiation of mononuclear leukocytes   | 8,74E-34 | AHR, APAF1, BCL2A1, CCL2, CCL19, CD2, CD28, CD86, CD1D, CD3D, CD3E, CD8A, CD8B, CSF1R, CTLA4, CXCR4, DOCK2, DUSP5, ETS1, FAS, GIMAP5, HDAC9 (includes EG:9734), HELLS, HGF, HLA-DOA, HLA-DQA1, ICOS, IFI16, IGHG1, IGHM, IKZF1, IL12RB1, IL2RB, IL2RG, IL7R, IRF1, IRF4, IRF8, ITGAL, ITGB2, ITK, JAK3, LCK, LCP2, LEF1, PIK3CD, POU2AF1, PRDM1, PTPN22, PTPRC, RASSF5, RUNX1, SH2D1A, SIT1, SOCS3, STAT1, STAT4, TBX21, TLR4, TLR7, TNFSF13B, TOX, TRA@, TRAT1, VAV1                                                                                                                                                                                                                                                                      | 65  |
| Cellular Development | differe ntiation | differentiation of lymphocytes              | 2,36E-32 | AHR, APAF1, BCL2A1, CCL19, CD2, CD28, CD86, CD1D, CD3D, CD3E, CD8A, CD8B, CTLA4, CXCR4, DOCK2, DUSP5, ETS1, FAS, GIMAP5, HDAC9 (includes EG:9734), HELLS, HLA-DOA, HLA-DQA1, ICOS, IGHG1, IGHM, IKZF1, IL12RB1, IL2RB, IL2RG, IL7R, IRF1, IRF4, IRF8, ITGAL, ITGB2, ITK, JAK3, LCK, LCP2, LEF1, PIK3CD, POU2AF1, PRDM1, PTPN22, PTPRC, RASSF5, RUNX1, SH2D1A, SIT1, SOCS3, STAT1, STAT4, TBX21, TLR4, TLR7, TNFSF13B, TOX, TRA@, TRAT1, VAV1                                                                                                                                                                                                                                                                                               | 61  |
| Cellular Development | differe ntiation | differentiation of T lymphocytes            | 3,33E-26 | AHR, APAF1, BCL2A1, CCL19, CD2, CD28, CD86, CD1D, CD3E, CD8A, CD8B, CTLA4, ETS1, GIMAP5, HLA-DOA, HLA-DQA1, ICOS, IGHG1, IKZF1, IL12RB1, IL2RB, IL2RG, IL7R, IRF1, IRF4, IRF8, ITGAL, ITGB2, ITK, JAK3, LCK, LCP2, LEF1, PIK3CD, PRDM1, PTPN22, PTPRC, RASSF5, RUNX1, SH2D1A, SOCS3, STAT1, STAT4, TBX21, TNFSF13B, TOX, TRA@, VAV1                                                                                                                                                                                                                                                                                                                                                                                                        | 48  |
| Cellular Development | differe ntiation | differentiation of cells                    | 1,25E-19 | AHR, APAF1, BCL2A1, BTK, C1QC, CCL2, CCL5, CCL19, CCND2, CD2, CD28, CD47, CD86, CD1D, CD300A, CD300LF, CD3D, CD3E, CD8A, CD8B, CSF1R, CSF2RB, CSTA, CTLA4, CXCR4, DOCK2, DUSP5, EOMES, ETS1, FAS, FCER1G, FHL2, FLI1, GABBR1, GIMAP5, GNA13, GZMB, HCLS1, HDAC9 (includes EG:9734), HELLS, HGF, HIF1A, HLA-DOA, HLA-DQA1, ICOS, IFI16, IGHG1, IGHM, IKZF1, IL10RA, IL12RB1, IL2RB, IL2RG, IL7R, IRF1, IRF4, IRF8, ITGAL, ITGAM, ITGB2, ITGB6, ITK, JAK3, LCK, LCP2, LEF1, LYN, MAP4K1, PIK3CD, PLAC8, PLSCR1, POU2AF1, PRDM1, PRKCB, PTGER4, PTPN22, PTPRC, RAB27A, RASSF5, RBL1, RGS10, RUNX1, RUNX2, RUNX3, SH2D1A, SIT1, SOCS3, ST8SIA4, STAT1, STAT4, TBX21, TLR4, TLR7, TNC, TNFRSF1B, TNFSF13B, TOX, TRA@, TRAT1, TYROBP, VAV1, VCAN | 102 |
| Cellular Development | differe ntiation | differentiation of helper T lymphocytes     | 3,76E-14 | AHR, CD28, CD86, CTLA4, ETS1, ICOS, IGHG1, IL12RB1, IL2RB, IRF1, IRF8, ITGAL, ITGB2, ITK, JAK3, PIK3CD, RUNX1, SH2D1A, STAT1, STAT4, TBX21, TNFSF13B, VAV1                                                                                                                                                                                                                                                                                                                                                                                                                                                                                                                                                                                 | 23  |
| Cellular Development | differe ntiation | differentiation of Th2 cells                | 3,55E-12 | CD28, CD86, CTLA4, ICOS, IGHG1, IRF1, ITK, JAK3, PIK3CD, RUNX1, SH2D1A, STAT1, STAT4, TBX21, VAV1                                                                                                                                                                                                                                                                                                                                                                                                                                                                                                                                                                                                                                          | 15  |
| Cellular Development | differe ntiation | differentiation of Th1 cells                | 1,08E-08 | CD86, CTLA4, ICOS, IL12RB1, IRF1, IRF8, ITGAL, ITGB2, JAK3, PIK3CD, STAT1, STAT4, TBX21                                                                                                                                                                                                                                                                                                                                                                                                                                                                                                                                                                                                                                                    | 13  |
| Cellular Development | differe ntiation | differentiation of B lymphocytes            | 3,90E-08 | CXCR4, DUSP5, HDAC9 (includes EG:9734), ICOS, IGHM, IKZF1, IL2RB, IL2RG, IL7R, IRF4, PIK3CD, POU2AF1, PRDM1, PTPRC, TLR4, TLR7, TNFSF13B                                                                                                                                                                                                                                                                                                                                                                                                                                                                                                                                                                                                   | 17  |
| Cellular Development | differe ntiation | differentiation of thymocytes               | 1,06E-07 | APAF1, CD2, CD28, CD86, CD3E, CD8B, IKZF1, IL2RG, LCP2, TRA@                                                                                                                                                                                                                                                                                                                                                                                                                                                                                                                                                                                                                                                                               | 10  |
| Cellular Development | differe ntiation | differentiation of antigen presenting cells | 1,36E-07 | C1QC, CD47, CSF1R, CSF2RB, DUSP5, GIMAP5, HGF, IKZF1, IRF4, IRF8, ITGB6, LYN, PRDM1, RGS10, SOCS3, TLR4                                                                                                                                                                                                                                                                                                                                                                                                                                                                                                                                                                                                                                    | 16  |
| Cellular Development | differe ntiation | differentiation of osteocytes               | 4,82E-07 | CCL2, CCL5, CD47, CD300LF, CSF1R, FAS, FCER1G, FHL2, IFI16, IGHG1, PTGER4, RBL1, RGS10, RUNX2, SOCS3, STAT1, TLR4, TYROBP                                                                                                                                                                                                                                                                                                                                                                                                                                                                                                                                                                                                                  | 18  |
| Cellular Development | differe ntiation | differentiation of plasma cells             | 1,68E-06 | CXCR4, DUSP5, ICOS, IRF4, POU2AF1, PRDM1, TNFSF13B                                                                                                                                                                                                                                                                                                                                                                                                                                                                                                                                                                                                                                                                                         | 7   |
| Cellular Development | cell death       | cell death of T lymphocytes                 | 5,52E-23 | APAF1, BCL2A1, CASP1, CCL4, CCL5, CCL19, CCR5, CD2, CD28, CD47, CD247, CD3E, CHEK2, CIITA, CLEC10A, CTLA4, CXCR4, EOMES, FAS, GIMAP5, GZMA, GZMB, ICOS, IDO1, IGHM, IL2RG, IL7R, ITK, JAK3, KLRD1, LCK, MAP4K1, PIK3CD, PRDM1, PRF1, PTPRC, RAC2, SH2D2A, STAT1, TBX21, TNFRSF1B, XCL1                                                                                                                                                                                                                                                                                                                                                                                                                                                     | 42  |
| Cellular Development | cell death       | cell death of natural killer                | 8,80E-07 | CD2, EOMES, FAS, ITGAL, KLRD1, TBX21                                                                                                                                                                                                                                                                                                                                                                                                                                                                                                                                                                                                                                                                                                       | 6   |

|                      |              |                                      |          |                                                                                                                                                                                                                                            |    |  |
|----------------------|--------------|--------------------------------------|----------|--------------------------------------------------------------------------------------------------------------------------------------------------------------------------------------------------------------------------------------------|----|--|
|                      |              | cells                                |          |                                                                                                                                                                                                                                            |    |  |
| Cellular Development | growth       | growth of blood cells                | 3,57E-21 | AHR, BTK, CBL, CCL2, CCL4, CCND2, CCR6, CD2, CD28, CD86, CD163, CD244, CD3E, CSF1R, CTLA4, FAS, HGF, HIF1A, ICOS, IGHM, IL10RA, IL2RB, IL7R, IRF1, IRF8, JAK3, LCP2, LYN, MLLT3, PIK3CD, PRF1, RUNX1, SRGN, STAT4, TNFRSF1B, TNFSF13B, TOX | 37 |  |
| Cellular Development | growth       | growth of leukocytes                 | 9,23E-19 | AHR, BTK, CBL, CCL2, CCR6, CD2, CD28, CD86, CD244, CD3E, CSF1R, CTLA4, HGF, HIF1A, ICOS, IGHM, IL10RA, IL2RB, IL7R, IRF1, IRF8, JAK3, LCP2, LYN, MLLT3, PIK3CD, PRF1, SRGN, STAT4, TNFRSF1B, TNFSF13B, TOX                                 | 32 |  |
| Cellular Development | growth       | growth of lymphocytes                | 4,93E-15 | AHR, BTK, CBL, CCR6, CD2, CD28, CD86, CD244, CD3E, CTLA4, HIF1A, ICOS, IGHM, IL2RB, IL7R, IRF1, JAK3, LCP2, PIK3CD, PRF1, SRGN, STAT4, TNFRSF1B, TNFSF13B, TOX                                                                             | 25 |  |
| Cellular Development | expansion    | expansion of blood cells             | 3,15E-18 | AHR, BTK, CBL, CCND2, CCR6, CD2, CD28, CD86, CD163, CD244, CD3E, CTLA4, ICOS, IGHM, IL10RA, IL7R, IRF1, JAK3, LCP2, LYN, MLLT3, PIK3CD, PRF1, RUNX1, SRGN, STAT4, TNFRSF1B, TNFSF13B, TOX                                                  | 29 |  |
| Cellular Development | expansion    | expansion of leukocytes              | 9,08E-17 | AHR, BTK, CBL, CCR6, CD2, CD28, CD86, CD244, CD3E, CTLA4, ICOS, IGHM, IL10RA, IL7R, IRF1, JAK3, LCP2, LYN, MLLT3, PIK3CD, PRF1, SRGN, STAT4, TNFRSF1B, TNFSF13B, TOX                                                                       | 26 |  |
| Cellular Development | expansion    | expansion of lymphocytes             | 2,02E-15 | AHR, BTK, CBL, CCR6, CD2, CD28, CD86, CD244, CD3E, CTLA4, ICOS, IGHM, IL7R, IRF1, JAK3, LCP2, PIK3CD, PRF1, SRGN, STAT4, TNFRSF1B, TNFSF13B, TOX                                                                                           | 23 |  |
| Cellular Development | expansion    | expansion of T lymphocytes           | 6,68E-15 | AHR, CBL, CCR6, CD2, CD28, CD86, CD244, CD3E, CTLA4, ICOS, IGHM, IRF1, JAK3, LCP2, PIK3CD, PRF1, SRGN, STAT4, TNFRSF1B, TNFSF13B, TOX                                                                                                      | 21 |  |
| Cellular Development | apoptosis    | apoptosis of T lymphocytes           | 3,12E-16 | BCL2A1, CASP1, CCL4, CCL5, CCR5, CD2, CD28, CD47, CD247, CD3E, CHEK2, CIITA, CTLA4, CXCR4, FAS, GIMAP5, GZMA, GZMB, ICOS, IL2RG, IL7R, ITK, JAK3, LCK, MAP4K1, PIK3CD, PRF1, PTPRC, RAC2, STAT1, TNFRSF1B, XCL1                            | 32 |  |
| Cellular Development | maturation   | maturation of leukocytes             | 1,89E-14 | AHR, BTK, CCL5, CCL19, CCL21, CCR2, CD28, CD86, CD247, FAS, HIF1A, IGHM, IRF1, IRF8, ITGAM, ITK, LCK, PTPRC, RUNX1, RUNX3, STAT1, TBX21, TLR4, TLR7, TLR8 (includes EG:51311), TNFSF13B, TYROBP, VAV1                                      | 28 |  |
| Cellular Development | maturation   | maturation of blood cells            | 5,32E-14 | AHR, BTK, CCL5, CCL19, CCL21, CCND2, CCR2, CD28, CD86, CD247, FAS, HIF1A, IGHM, IRF1, IRF8, ITGAM, ITK, LCK, PTPRC, RUNX1, RUNX3, STAT1, TBX21, TLR4, TLR7, TLR8 (includes EG:51311), TNFSF13B, TYROBP, VAV1                               | 29 |  |
| Cellular Development | maturation   | maturation of cells                  | 4,84E-11 | AHR, BTK, CCL5, CCL19, CCL21, CCND2, CCR2, CD28, CD86, CD247, FAS, FHL2, HIF1A, IGHM, IRF1, IRF8, ITGAM, ITK, LCK, PRKCB, PTPRC, RBL1, RUNX1, RUNX2, RUNX3, STAT1, TBX21, TLR4, TLR7, TLR8 (includes EG:51311), TNFSF13B, TYROBP, VAV1     | 33 |  |
| Cellular Development | maturation   | maturation of mononuclear leukocytes | 4,13E-09 | AHR, BTK, CD28, CD86, CD247, HIF1A, IGHM, ITGAM, ITK, LCK, PTPRC, RUNX1, RUNX3, TBX21, TNFSF13B, VAV1                                                                                                                                      | 16 |  |
| Cellular Development | maturation   | maturation of lymphocytes            | 1,80E-08 | AHR, BTK, CD28, CD86, CD247, HIF1A, IGHM, ITK, LCK, PTPRC, RUNX1, RUNX3, TBX21, TNFSF13B, VAV1                                                                                                                                             | 15 |  |
| Cellular Development | maturation   | maturation of dendritic cells        | 3,29E-07 | CCL5, CCL19, CCL21, CCR2, FAS, IRF1, IRF8, RUNX3, STAT1, TLR4, TLR7, TLR8 (includes EG:51311), TYROBP                                                                                                                                      | 13 |  |
| Cellular Development | shape change | shape change of blood cells          | 2,46E-12 | CCL2, CCL5, CCR2, CD47, CD247, CD3E, CORO1A, DOCK2, FCGR2A, GNA13, GZMB, HCK, ICOS, ITGAL, ITGAM, ITGB2, LYN                                                                                                                               | 17 |  |
| Cellular Development | shape change | shape change of leukocytes           | 2,30E-10 | CCL2, CCL5, CCR2, CD47, CD247, CD3E, CORO1A, DOCK2, HCK, ICOS, ITGAL, ITGAM, ITGB2, LYN                                                                                                                                                    | 14 |  |
| Cellular Development | shape change | shape change of eukaryotic cells     | 5,13E-09 | BASP1, CBL, CCL2, CCL5, CCR2, CD47, CD247, CD3E, CDC42SE2, CORO1A, CSF1R, DOCK2, FAS, FCGR2A, GNA13, GZMB, HCK, HGF, ICOS, ITGAL, ITGAM, ITGB2, KLRK1, LYN, PARVG, PLD1, RBL1, RUNX2, SERPINA3, TNC                                        | 30 |  |
| Cellular Development | shape change | shape change of normal cells         | 9,09E-09 | BASP1, CCL2, CCL5, CCR2, CD47, CD247, CD3E, CORO1A, DOCK2, FCGR2A, GNA13, GZMB, HCK, HGF, ICOS, ITGAL, ITGAM, ITGB2, LYN, RUNX2, SERPINA3                                                                                                  | 21 |  |
| Cellular Development | shape change | shape change of granulocytes         | 9,29E-08 | CCL2, CCL5, CCR2, CORO1A, HCK, ITGAM, ITGB2, LYN                                                                                                                                                                                           | 8  |  |
| Cellular Development | selection    | selection of T lymphocytes           | 1,38E-11 | CD28, CD1D, CD3D, CD3E, DOCK2, FAS, HLA-DOA, ITK, PTPRC, SIT1, TRAT1, VAV1                                                                                                                                                                 | 12 |  |
| Cellular Development | generation   | generation of T lymphocytes          | 2,92E-11 | CD28, CD86, HLA-DQB1, ICOS, IL10RA, IL12RB1, IL2RG, ITK, JAK3, PSMB9, SOCS3, STAT4, TBX21, TLR4, TNFSF13B                                                                                                                                  | 15 |  |
| Cellular Development | generation   | generation of helper T               | 6,36E-07 | CD28, IL12RB1, JAK3, SOCS3, STAT4, TBX21, TNFSF13B                                                                                                                                                                                         | 7  |  |

|                                               |                               |                                                |          |                                                                                                                                                                                                                                                                                                                                                                                                                                                                                                                                                                                                                                                                  |  |    |
|-----------------------------------------------|-------------------------------|------------------------------------------------|----------|------------------------------------------------------------------------------------------------------------------------------------------------------------------------------------------------------------------------------------------------------------------------------------------------------------------------------------------------------------------------------------------------------------------------------------------------------------------------------------------------------------------------------------------------------------------------------------------------------------------------------------------------------------------|--|----|
|                                               |                               | lymphocytes                                    |          |                                                                                                                                                                                                                                                                                                                                                                                                                                                                                                                                                                                                                                                                  |  |    |
| Cellular Development                          | generation                    | generation of Th1 cells                        | 1,02E-06 | CD28, IL12RB1, JAK3, STAT4, TBX21                                                                                                                                                                                                                                                                                                                                                                                                                                                                                                                                                                                                                                |  | 5  |
| Cellular Development                          | cell spreading                | cell spreading of blood cells                  | 7,48E-10 | CD47, CD247, CD3E, CORO1A, FCGR2A, GZMB, HCK, ICOS, ITGAL, ITGAM, ITGB2, LYN                                                                                                                                                                                                                                                                                                                                                                                                                                                                                                                                                                                     |  | 12 |
| Cellular Development                          | cell spreading                | cell spreading of leukocytes                   | 2,41E-08 | CD47, CD247, CD3E, CORO1A, HCK, ICOS, ITGAL, ITGAM, ITGB2, LYN                                                                                                                                                                                                                                                                                                                                                                                                                                                                                                                                                                                                   |  | 10 |
| Cellular Development                          | cell spreading                | cell spreading of normal cells                 | 3,31E-08 | CD47, CD247, CD3E, CORO1A, FCGR2A, GZMB, HCK, HGF, ICOS, ITGAL, ITGAM, ITGB2, LYN, SERPINA3                                                                                                                                                                                                                                                                                                                                                                                                                                                                                                                                                                      |  | 14 |
| Cellular Development                          | cell spreading                | cell spreading of eukaryotic cells             | 6,16E-07 | CBL, CD47, CD247, CD3E, CORO1A, FCGR2A, GZMB, HCK, HGF, ICOS, ITGAL, ITGAM, ITGB2, KLRK1, LYN, PARVG, SERPINA3, TNC                                                                                                                                                                                                                                                                                                                                                                                                                                                                                                                                              |  | 18 |
| Cellular Development                          | activation-induced cell death | activation-induced cell death of T lymphocytes | 1,39E-09 | CCR5, CD28, CD3E, CIITA, FAS, ITK, MAP4K1, PRF1, RAC2, STAT1                                                                                                                                                                                                                                                                                                                                                                                                                                                                                                                                                                                                     |  | 10 |
| Cellular Development                          | polarization                  | polarization of T lymphocytes                  | 1,71E-08 | CCL19, CD28, CTLA4, ICOS, IL12RB1, IRF4, LCK, RASSF5, STAT4, TBX21, VAV1                                                                                                                                                                                                                                                                                                                                                                                                                                                                                                                                                                                         |  | 11 |
| Cellular Development                          | morphogenesis                 | morphogenesis of cells                         | 2,34E-08 | BASP1, CBL, CCL2, CCL4, CCL5, CCR2, CD47, CD247, CD3E, CD3G, CDC42SE2, CORO1A, CSF1R, DOCK2, FAS, FCGR2A, GNA13, GZMB, HCK, HGF, ICOS, IL7R, ITGAL, ITGAM, ITGB2, KLRK1, LYN, PARVG, PLD1, RAC2, RBL1, RUNX2, SERPINA3, STK4, TNC                                                                                                                                                                                                                                                                                                                                                                                                                                |  | 35 |
| Hematological System Development and Function | development                   | development of lymphocytes                     | 3,56E-48 | AHR, APAF1, BCL11B, BCL2A1, BTK, CASP1, CBL, CCL4, CCL5, CCL19, CCR5, CD2, CD28, CD47, CD69, CD86, CD247, CD1D, CD3D, CD3E, CD3G, CD8A, CD8B, CHEK2, CIITA, CLEC10A, CTLA4, CXCR4, DCK, DOCK2, EOMES, ETS1, FAS, FCER1G, FCGR2A, GIMAP5, GZMA, GZMB, HIF1A, HLA-DOA, HLA-DQA1, HLA-DQB1, ICOS, IDO1, IGHG1, IGHM, IKZF1, IL10RA, IL12RB1, IL2RB, IL2RG, IL7R, IRF1, IRF4, IRF8, ITGAL, ITGB2, ITK, JAK3, KLRD1, LAT2, LAX1, LCK, LCP2, LEF1, LYN, MAP4K1, PIK3CD, POU2AF1, PRDM1, PRF1, PSMB9, PTPN22, PTPRC, RAC2, RASSF5, RUNX1, RUNX2, RUNX3, SH2D1A, SH2D2A, SIT1, SOCS3, STAT1, STAT4, TBX21, TLR4, TNFRSF1B, TNFSF13B, TOX, TRA@, TRAT1, VAV1, XCL1        |  | 94 |
| Hematological System Development and Function | development                   | development of leukocytes                      | 7,69E-48 | AHR, APAF1, BCL11B, BCL2A1, BTK, CASP1, CBL, CCL4, CCL5, CCL19, CCR5, CD2, CD28, CD47, CD69, CD86, CD247, CD1D, CD3D, CD3E, CD3G, CD8A, CD8B, CHEK2, CIITA, CLEC10A, CSF1R, CTLA4, CXCR4, DCK, DOCK2, EOMES, ETS1, FAS, FCER1G, FCGR2A, GIMAP5, GZMA, GZMB, HIF1A, HLA-DOA, HLA-DQA1, HLA-DQB1, ICOS, IDO1, IGHG1, IGHM, IKZF1, IL10RA, IL12RB1, IL2RB, IL2RG, IL7R, IRF1, IRF4, IRF8, ITGAL, ITGB2, ITK, JAK3, KLRD1, LAT2, LAX1, LCK, LCP2, LEF1, LYN, MAP4K1, PIK3CD, POU2AF1, PRDM1, PRF1, PSMB9, PTPN22, PTPRC, RAC2, RASSF5, RUNX1, RUNX2, RUNX3, SH2D1A, SH2D2A, SIT1, SOCS3, STAT1, STAT4, TBX21, TLR4, TNFRSF1B, TNFSF13B, TOX, TRA@, TRAT1, VAV1, XCL1 |  | 95 |
| Hematological System Development and Function | development                   | T cell development                             | 2,65E-45 | AHR, APAF1, BCL11B, BCL2A1, CASP1, CBL, CCL4, CCL5, CCL19, CCR5, CD2, CD28, CD47, CD86, CD247, CD1D, CD3D, CD3E, CD3G, CD8A, CD8B, CHEK2, CIITA, CLEC10A, CTLA4, CXCR4, DOCK2, EOMES, ETS1, FAS, FCER1G, FCGR2A, GIMAP5, GZMA, GZMB, HLA-DOA, HLA-DQA1, HLA-DQB1, ICOS, IDO1, IGHG1, IGHM, IKZF1, IL10RA, IL12RB1, IL2RB, IL2RG, IL7R, IRF1, IRF4, IRF8, ITGAL, ITGB2, ITK, JAK3, KLRD1, LAT2, LAX1, LCK, LCP2, LEF1, MAP4K1, PIK3CD, PRDM1, PRF1, PSMB9, PTPN22, PTPRC, RAC2, RASSF5, RUNX1, RUNX2, RUNX3, SH2D1A, SH2D2A, SIT1, SOCS3, STAT1, STAT4, TBX21, TLR4, TNFRSF1B, TNFSF13B, TOX, TRA@, TRAT1, VAV1, XCL1                                             |  | 88 |
| Hematological System Development and Function | development                   | development of thymocytes                      | 4,63E-12 | CD3D, CD3E, CD3G, CXCR4, ETS1, IL2RB, IL2RG, IL7R, IRF1, LAT2, LAX1, LCP2, PTPRC, SIT1, TRA@, TRAT1                                                                                                                                                                                                                                                                                                                                                                                                                                                                                                                                                              |  | 16 |
| Hematological System Development and Function | development                   | development of helper T lymphocytes            | 8,61E-11 | AHR, CASP1, CD28, CD86, ICOS, IL12RB1, IRF1, ITGB2, ITK, SOCS3, STAT1, STAT4, TBX21                                                                                                                                                                                                                                                                                                                                                                                                                                                                                                                                                                              |  | 13 |

|                                               |               |                                          |          |                                                                                                                                                                                                                                                                                                                                                                                                                                                                                                                                                                                                                                                                                                                                                       |     |
|-----------------------------------------------|---------------|------------------------------------------|----------|-------------------------------------------------------------------------------------------------------------------------------------------------------------------------------------------------------------------------------------------------------------------------------------------------------------------------------------------------------------------------------------------------------------------------------------------------------------------------------------------------------------------------------------------------------------------------------------------------------------------------------------------------------------------------------------------------------------------------------------------------------|-----|
| Hematological System Development and Function | development   | development of B lymphocytes             | 3,12E-10 | BTK, CBL, CD69, CXCR4, DCK, HIF1A, IGHM, IL2RG, IL7R, JAK3, LYN, PIK3CD, POU2AF1, PRDM1, TNFSF13B, VAV1                                                                                                                                                                                                                                                                                                                                                                                                                                                                                                                                                                                                                                               | 16  |
| Hematological System Development and Function | development   | arrest in development of lymphocytes     | 1,73E-07 | BTK, CBL, CD3D, CXCR4, LCK, LCP2                                                                                                                                                                                                                                                                                                                                                                                                                                                                                                                                                                                                                                                                                                                      | 6   |
| Hematological System Development and Function | development   | NK cell development                      | 6,40E-07 | CD2, CD1D, EOMES, FAS, FCGR2A, IKZF1, IRF1, ITGAL, JAK3, KLRD1, TBX21                                                                                                                                                                                                                                                                                                                                                                                                                                                                                                                                                                                                                                                                                 | 11  |
| Hematological System Development and Function | development   | arrest in development of T lymphocytes   | 1,02E-06 | CBL, CD3D, CXCR4, LCK, LCP2                                                                                                                                                                                                                                                                                                                                                                                                                                                                                                                                                                                                                                                                                                                           | 5   |
| Hematological System Development and Function | development   | development of gamma-delta T lymphocytes | 1,76E-06 | CD3D, CD3G, IL2RG, JAK3                                                                                                                                                                                                                                                                                                                                                                                                                                                                                                                                                                                                                                                                                                                               | 4   |
| Hematological System Development and Function | hematopoiesis | hematopoiesis                            | 1,07E-46 | AHR, APAF1, BCL11B, BCL2A1, BTK, C1QC, CASP1, CBL, CCL4, CCL5, CCL19, CCR2, CCR5, CD2, CD28, CD47, CD69, CD86, CD247, CD1D, CD3D, CD3E, CD3G, CD8A, CD8B, CHEK2, CIITA, CLEC10A, CSF1R, CSF2RB, CTLA4, CXCR4, DCK, DOCK2, DUSP5, EOMES, ETS1, FAS, FCER1G, FCGR2A, GIMAP5, GZMA, GZMB, HDAC9 (includes EG:9734), HELLS, HIF1A, HLA-DOA, HLA-DQA1, HLA-DQB1, ICOS, IDO1, IGHG1, IGHM, IKZF1, IL10RA, IL12RB1, IL2RB, IL2RG, IL7R, IRF1, IRF4, IRF8, ITGAL, ITGB2, ITK, JAK3, KLRD1, LAT2, LAX1, LCK, LCP2, LEF1, LTF, LYN, MAP4K1, PIK3CD, PLSCR1, POU2AF1, PRDM1, PRF1, PSMB9, PTPN22, PTPRC, RAC2, RASSF5, RUNX1, RUNX2, RUNX3, SH2D1A, SH2D2A, SIT1, SOCS3, STAT1, STAT4, STK4, TBX21, TLR4, TLR7, TNFRSF1B, TNFSF13B, TOX, TRA@, TRAT1, VAV1, XCL1 | 105 |
| Hematological System Development and Function | homeostasis   | T cell homeostasis                       | 5,21E-46 | AHR, APAF1, BCL11B, BCL2A1, CASP1, CBL, CCL4, CCL5, CCL19, CCR5, CD2, CD28, CD47, CD86, CD247, CD1D, CD3D, CD3E, CD3G, CD8A, CD8B, CHEK2, CIITA, CLEC10A, CORO1A, CTLA4, CXCR4, DOCK2, EOMES, ETS1, FAS, FCER1G, FCGR2A, GIMAP5, GZMA, GZMB, HLA-DOA, HLA-DQA1, HLA-DQB1, ICOS, IDO1, IGHG1, IGHM, IKZF1, IL10RA, IL12RB1, IL2RB, IL2RG, IL7R, IRF1, IRF4, IRF8, ITGAL, ITGB2, ITK, JAK3, KLRD1, LAT2, LAX1, LCK, LCP2, LEF1, MAP4K1, PIK3CD, PRDM1, PRF1, PSMB9, PTPN22, PTPRC, RAC2, RASSF5, RUNX1, RUNX2, RUNX3, SH2D1A, SH2D2A, SIT1, SOCS3, STAT1, STAT4, TBX21, TLR4, TNFRSF1B, TNFSF13B, TOX, TRA@, TRAT1, VAV1, XCL1                                                                                                                          | 89  |
| Hematological System Development and Function | activation    | activation of leukocytes                 | 1,47E-45 | BTK, C1QA, C3AR1, CCL2, CCL4, CCL5, CCR2, CD2, CD28, CD47, CD48, CD86, CD163, CD244, CD247, CD1B, CD1C, CD1D, CD1E, CD300A, CD3E, CD8A, CFH, CLEC4C, CLEC7A, CORO1A, CSF1R, CTLA4, CXCL6, CXCL9, DOCK2, FAS, FCER1G, FCGR1A, FCGR2A, FYB, GIMAP5, GZMA, GZMB, HCK, HLA-DMB, HLA-DOA, HLA-DQA1, HLA-DQB1, HLA-DRA, ICOS, IGHG1, IGHM, IL12RB1, IL2RB, ITGAL, ITGAM, ITGB2, ITGB6, ITK, JAK3, KLRD1, KLRK1, LAT2, LAX1, LCK, LCP2, LTF, LY96, LYN, PIK3CD, POU2AF1, PRF1, PSMB9, PTGES, PTPRC, SIRPG, SIT1, SLAMF6, STAT1, STAT4, TBX21, TLR4, TLR7, TLR8 (includes EG:51311), TNC, TNFRSF17, TNFRSF1B, TNFSF13B, TYROBP, VAV1                                                                                                                          | 86  |
| Hematological System Development and Function | activation    | activation of blood cells                | 6,41E-44 | BTK, C1QA, C3AR1, CCL2, CCL4, CCL5, CCR2, CD2, CD28, CD47, CD48, CD86, CD163, CD244, CD247, CD1B, CD1C, CD1D, CD1E, CD300A, CD3E, CD8A, CFH, CLEC4C, CLEC7A, CORO1A, CSF1R, CTLA4, CXCL6, CXCL9, DOCK2, FAS, FCER1G, FCGR1A, FCGR2A, FYB, GIMAP5, GNA13, GZMA, GZMB, HCK, HLA-DMB, HLA-DOA, HLA-DQA1, HLA-DQB1, HLA-DRA, ICOS, IGHG1, IGHM, IL12RB1, IL2RB, ITGAL, ITGAM, ITGB2, ITGB6, ITK, JAK3, KLRD1, KLRK1, LAT2, LAX1, LCK, LCP2, LTF, LY96, LYN, PIK3CD, POU2AF1, PRF1, PSMB9, PTGES, PTPRC, SIRPG, SIT1, SLAMF6, STAT1, STAT4, TBX21, TLR4, TLR7, TLR8 (includes EG:51311), TNC, TNFRSF17, TNFRSF1B, TNFSF13B, TYROBP, VAV1                                                                                                                   | 87  |
| Hematological System Development              | activation    | activation of mononuclear leukocytes     | 1,22E-39 | BTK, C1QA, C3AR1, CCL2, CCL4, CCL5, CCR2, CD2, CD28, CD47, CD48, CD86, CD163, CD244, CD247, CD1B, CD1C, CD1D, CD1E, CD3E, CD8A, CLEC4C, CLEC7A, CORO1A, CTLA4, DOCK2, FAS, FCER1G, FCGR2A,                                                                                                                                                                                                                                                                                                                                                                                                                                                                                                                                                            | 69  |

|                                               |            |                                        |          |                                                                                                                                                                                                                                                                                                                                                                                                                                                                                                                                                                                                                        |    |
|-----------------------------------------------|------------|----------------------------------------|----------|------------------------------------------------------------------------------------------------------------------------------------------------------------------------------------------------------------------------------------------------------------------------------------------------------------------------------------------------------------------------------------------------------------------------------------------------------------------------------------------------------------------------------------------------------------------------------------------------------------------------|----|
| and Function                                  |            |                                        |          | GIMAP5, GZMA, GZMB, HLA-DRA, ICOS, IGHG1, IGHM, IL12RB1, IL2RB, ITGAL, ITGB2, ITK, JAK3, KLRD1, KLRK1, LAT2, LAX1, LCK, LTF, LY96, LYN, PIK3CD, POU2AF1, PRF1, PTPRC, SIRPG, SIT1, SLAMF6, STAT1, STAT4, TBX21, TLR4, TLR7, TLR8 (includes EG:51311), TNC, TNFRSF17, TNFRSF1B, TNFSF13B, TYROBP, VAV1                                                                                                                                                                                                                                                                                                                  |    |
| Hematological System Development and Function | activation | activation of lymphocytes              | 3,94E-39 | BTK, C1QA, C3AR1, CCL2, CCL4, CCL5, CCR2, CD2, CD28, CD47, CD48, CD86, CD244, CD247, CD1B, CD1C, CD1D, CD1E, CD3E, CD8A, CLEC4C, CLEC7A, CORO1A, CTLA4, DOCK2, FAS, FCER1G, FCGR2A, GIMAP5, GZMA, GZMB, HLA-DRA, ICOS, IGHG1, IGHM, IL12RB1, IL2RB, ITGAL, ITGB2, ITK, JAK3, KLRD1, KLRK1, LAT2, LAX1, LCK, LTF, LYN, PIK3CD, POU2AF1, PRF1, PTPRC, SIRPG, SIT1, SLAMF6, STAT1, STAT4, TBX21, TLR4, TLR7, TLR8 (includes EG:51311), TNC, TNFRSF17, TNFRSF1B, TNFSF13B, TYROBP, VAV1                                                                                                                                    | 67 |
| Hematological System Development and Function | activation | activation of T lymphocytes            | 3,31E-31 | C3AR1, CCL2, CCL4, CCL5, CCR2, CD2, CD28, CD47, CD48, CD86, CD244, CD247, CD1D, CD3E, CD8A, CLEC4C, CLEC7A, CORO1A, CTLA4, DOCK2, FAS, FCER1G, GIMAP5, GZMA, GZMB, HLA-DRA, ICOS, IGHG1, IL2RB, ITGAL, ITGB2, ITK, JAK3, KLRD1, LAT2, LAX1, LCK, PIK3CD, PRF1, PTPRC, SIRPG, SIT1, STAT1, STAT4, TBX21, TLR4, TLR7, TLR8 (includes EG:51311), TNC, TNFRSF1B, TYROBP, VAV1                                                                                                                                                                                                                                              | 52 |
| Hematological System Development and Function | activation | activation of antigen presenting cells | 1,93E-12 | CCL2, CCL4, CCL5, CD86, CD1D, CSF1R, FAS, FCER1G, FCGR1A, FCGR2A, HCK, HLA-DMB, HLA-DOA, HLA-DQA1, HLA-DQB1, IGHM, ITGB6, LTF, PSMB9, PTGES, STAT1, STAT4, TLR4, TLR7, TNFRSF1B                                                                                                                                                                                                                                                                                                                                                                                                                                        | 25 |
| Hematological System Development and Function | activation | activation of B lymphocytes            | 7,97E-11 | BTK, C1QA, CD86, CD8A, FAS, IGHG1, IGHM, LAT2, LAX1, LYN, PIK3CD, POU2AF1, PTPRC, TLR4, TNFRSF17, TNFSF13B, VAV1                                                                                                                                                                                                                                                                                                                                                                                                                                                                                                       | 17 |
| Hematological System Development and Function | activation | activation of natural killer cells     | 3,15E-10 | CCL5, CD2, CD28, CD244, CD1D, FCGR2A, IL12RB1, IL2RB, ITGAL, ITGB2, KLRD1, KLRK1, LTF, PRF1, SLAMF6, STAT4, TYROBP                                                                                                                                                                                                                                                                                                                                                                                                                                                                                                     | 17 |
| Hematological System Development and Function | activation | activation of mast cells               | 1,71E-08 | CCL5, CCR2, CD48, CD300A, FCER1G, FCGR2A, FYB, ITGAM, LCP2, TLR7, TLR8 (includes EG:51311)                                                                                                                                                                                                                                                                                                                                                                                                                                                                                                                             | 11 |
| Hematological System Development and Function | activation | activation of cytotoxic T cells        | 8,02E-07 | CCR2, CD28, CD86, CD247, CTLA4, FAS, GZMA, GZMB, PRF1                                                                                                                                                                                                                                                                                                                                                                                                                                                                                                                                                                  | 9  |
| Hematological System Development and Function | quantity   | quantity of leukocytes                 | 1,59E-44 | AHR, BCL2A1, BTK, C1QA, CCL2, CCL5, CCL19, CCL21, CCR2, CCR6, CD28, CD47, CD69, CD86, CD244, CD247, CD1D, CD3D, CD3E, CD3G, CD8A, CFH, CIITA, CSF1R, CSF2RB, CTLA4, CTSS, CXCR4, CXCR6 (includes EG:10663), CYTIP, ETS1, FAS, FCER1A, FCER1G, FCGR1A, FCGR2A, FLI1, GNA13, HGF, HIF1A, HLA-DQA1, ICOS, IGHM, IGKC, IKZF1, IL10RA, IL12RB1, IL2RB, IL2RG, IL7R, IRF1, IRF4, IRF8, ITGAM, ITGB2, ITGB6, ITK, JAK3, LCK, LCP2, LYN, PIK3CD, PLSCR1, POU2AF1, PRDM1, PRF1, PTGES, PTPRC, RAC2, RUNX1, RUNX2, RUNX3, SELPLG, SIT1, SOCS3, STAT1, STAT4, TAP1, TBX21, TLR4, TNFRSF1B, TNFSF13B, TOX, TRA@, TYROBP, VAV1      | 86 |
| Hematological System Development and Function | quantity   | quantity of blood cells                | 5,67E-42 | AHR, BCL2A1, BTK, C1QA, CBL, CCL2, CCL5, CCL19, CCL21, CCR2, CCR6, CD28, CD47, CD69, CD86, CD244, CD247, CD1D, CD3D, CD3E, CD3G, CD8A, CFH, CIITA, CSF1R, CSF2RB, CTLA4, CTSS, CXCR4, CXCR6 (includes EG:10663), CYTIP, ETS1, FAS, FCER1A, FCER1G, FCGR1A, FCGR2A, FLI1, GNA13, HGF, HIF1A, HLA-DQA1, ICOS, IGHM, IGKC, IKZF1, IL10RA, IL12RB1, IL2RB, IL2RG, IL7R, IRF1, IRF4, IRF8, ITGAM, ITGB2, ITGB6, ITK, JAK3, LCK, LCP2, LYN, PIK3CD, PLSCR1, POU2AF1, PRDM1, PRF1, PTGES, PTPRC, RAC2, RUNX1, RUNX2, RUNX3, SELPLG, SIT1, SOCS3, STAT1, STAT4, TAP1, TBX21, TLR4, TNFRSF1B, TNFSF13B, TOX, TRA@, TYROBP, VAV1 | 87 |
| Hematological System Development and Function | quantity   | quantity of lymphocytes                | 2,59E-39 | AHR, BCL2A1, BTK, CCL19, CCL21, CCR2, CCR6, CD28, CD69, CD86, CD244, CD247, CD1D, CD3D, CD3E, CD3G, CIITA, CSF2RB, CTLA4, CTSS, CXCR4, CYTIP, ETS1, FAS, FCER1G, FCGR1A, FCGR2A, FLI1, GNA13, HIF1A, HLA-DQA1, ICOS, IGHM, IGKC, IKZF1, IL10RA, IL2RB, IL2RG, IL7R, IRF1, ITGAM, ITGB2, ITGB6, ITK, JAK3, LCK, LCP2, LYN, PIK3CD, POU2AF1, PRDM1, PRF1, PTPRC, RAC2, RUNX1, RUNX2, RUNX3, SELPLG, SIT1,                                                                                                                                                                                                                | 70 |

|                                               |                       |                                           |          |                                                                                                                                                                                                                                                                                                                                                                                      |     |
|-----------------------------------------------|-----------------------|-------------------------------------------|----------|--------------------------------------------------------------------------------------------------------------------------------------------------------------------------------------------------------------------------------------------------------------------------------------------------------------------------------------------------------------------------------------|-----|
|                                               |                       |                                           |          | SOCS3, STAT1, STAT4, TAP1, TBX21, TNFRSF1B, TNFSF13B, TOX, TRA@, TYROBP, VAV1                                                                                                                                                                                                                                                                                                        |     |
| Hematological System Development and Function | quantity              | quantity of T lymphocytes                 | 8,24E-28 | AHR, BCL2A1, CCL19, CCL21, CCR2, CCR6, CD28, CD86, CD244, CD247, CD1D, CD3D, CD3E, CD3G, CIITA, CSF2RB, CTLA4, CTSS, CXCR4, ETS1, FAS, FLI1, IKZF1, IL10RA, IL2RB, IL2RG, IL7R, IRF1, ITGAM, ITGB2, ITK, JAK3, LCK, LCP2, PTPRC, RUNX1, RUNX2, RUNX3, SELPLG, SIT1, SOCS3, STAT1, TAP1, TBX21, TNFRSF1B, TNFSF13B, TOX, TRA@, VAV1                                                   | 49  |
| Hematological System Development and Function | quantity              | quantity of B lymphocytes                 | 1,56E-16 | AHR, BCL2A1, BTK, CCR6, CD28, CD69, CXCR4, FCER1G, FCGR1A, FCGR2A, GNA13, HIF1A, HLA-DQA1, ICOS, IGHM, IGKC, IL2RG, IL7R, ITGB2, JAK3, LYN, PIK3CD, POU2AF1, PRDM1, RAC2, TNFRSF1B, TNFSF13B, TRA@, VAV1                                                                                                                                                                             | 29  |
| Hematological System Development and Function | quantity              | quantity of antigen presenting cells      | 3,51E-13 | CCL2, CCL19, CCL21, CCR2, CCR6, CD47, CSF1R, CTLA4, CTSS, CXCR6 (includes EG:10663), FAS, IKZF1, IL12RB1, IRF1, IRF4, IRF8, ITGB2, ITGB6, PTGES, SELPLG, SOCS3, STAT4, TLR4, TYROBP                                                                                                                                                                                                  | 24  |
| Hematological System Development and Function | quantity              | quantity of granulocytes                  | 3,82E-12 | AHR, C1QA, CCR6, CD1D, CD8A, CFH, CSF2RB, FAS, FCER1A, FCGR1A, FLI1, IRF8, ITGB2, JAK3, LYN, PLSR1, RAC2, SELPLG, SOCS3, STAT4, TLR4, TNFRSF1B                                                                                                                                                                                                                                       | 22  |
| Hematological System Development and Function | quantity              | quantity of myeloid cells                 | 7,21E-12 | AHR, C1QA, CCR6, CD1D, CD8A, CFH, CSF2RB, FAS, FCER1A, FCGR1A, FLI1, IKZF1, IRF8, ITGB2, JAK3, LYN, PLSR1, RAC2, SELPLG, SOCS3, STAT4, TLR4, TNFRSF1B                                                                                                                                                                                                                                | 23  |
| Hematological System Development and Function | quantity              | quantity of phagocytes                    | 1,16E-11 | AHR, C1QA, CCL2, CCR2, CCR6, CD1D, CFH, CSF1R, CTSS, CXCR6 (includes EG:10663), FAS, FCGR1A, IL12RB1, ITGB2, ITGB6, JAK3, PLSR1, PTGES, RAC2, SELPLG, SOCS3, STAT4, TLR4, TNFRSF1B                                                                                                                                                                                                   | 24  |
| Hematological System Development and Function | quantity              | quantity of natural killer cells          | 1,30E-11 | CD86, CD244, ETS1, ICOS, IL2RB, IL2RG, IRF1, JAK3, PIK3CD, PRF1, PTPRC, TBX21, TYROBP                                                                                                                                                                                                                                                                                                | 13  |
| Hematological System Development and Function | quantity              | quantity of natural killer T lymphocytes  | 1,68E-10 | CD1D, CD3E, CSF2RB, ETS1, IKZF1, IL2RB, IL2RG, PTPRC, TBX21, VAV1                                                                                                                                                                                                                                                                                                                    | 10  |
| Hematological System Development and Function | quantity              | quantity of thymocytes                    | 3,70E-10 | CD86, CD244, CD247, CD3E, CTLA4, ETS1, FAS, IL2RG, IL7R, ITK, JAK3, LCK, LCP2, RUNX1, RUNX3, TOX, TRA@                                                                                                                                                                                                                                                                               | 17  |
| Hematological System Development and Function | quantity              | quantity of dendritic cells               | 5,54E-10 | CCL19, CCL21, CCR2, CCR6, CD47, CTLA4, IKZF1, IRF1, IRF4, IRF8, ITGB2, TLR4, TYROBP                                                                                                                                                                                                                                                                                                  | 13  |
| Hematological System Development and Function | quantity              | quantity of intraepithelial T lymphocytes | 5,78E-10 | CCR6, IKZF1, IL2RG, IL7R, IRF1, PTPRC, TAP1                                                                                                                                                                                                                                                                                                                                          | 7   |
| Hematological System Development and Function | quantity              | quantity of neutrophils                   | 3,31E-08 | AHR, C1QA, CD1D, CFH, FAS, FCGR1A, ITGB2, JAK3, PLSR1, RAC2, SELPLG, SOCS3, TLR4, TNFRSF1B                                                                                                                                                                                                                                                                                           | 14  |
| Hematological System Development and Function | quantity              | quantity of plasma cells                  | 1,29E-07 | ICOS, IL7R, ITGB2, PRDM1, RAC2, TNFRSF1B, TNFSF13B                                                                                                                                                                                                                                                                                                                                   | 7   |
| Hematological System Development and Function | quantity              | quantity of macrophages                   | 1,07E-06 | CCL2, CCR2, CCR6, CSF1R, CTSS, CXCR6 (includes EG:10663), FAS, IL12RB1, ITGB6, PTGES, SELPLG, SOCS3, STAT4, TLR4                                                                                                                                                                                                                                                                     | 14  |
| Hematological System Development and Function | hematological process | hematological process                     | 1,26E-43 | AHR, APAF1, BCL11B, BCL2A1, BTK, C1QC, CASP1, CBL, CCL4, CCL5, CCL19, CCR2, CCR5, CD2, CD28, CD47, CD69, CD86, CD247, CD1D, CD3D, CD3E, CD3G, CD8A, CD8B, CHEK2, CIITA, CLEC10A, CSF1R, CSF2RB, CTLA4, CXCR4, DCK, DOCK2, DUSP5, EOMES, ETS1, FAS, FCER1G, FCGR2A, FLI1, GIMAP5, GNA13, GZMA, GZMB, HDAC9 (includes EG:9734), HELLS, HIF1A, HLA-DOA, HLA-DQA1, HLA-DQB1, ICOS, IDO1, | 108 |

|                                                         |                     |                                               |          |                                                                                                                                                                                                                                                                                                                                                                                                                                                                                                                                                                                   |    |
|---------------------------------------------------------|---------------------|-----------------------------------------------|----------|-----------------------------------------------------------------------------------------------------------------------------------------------------------------------------------------------------------------------------------------------------------------------------------------------------------------------------------------------------------------------------------------------------------------------------------------------------------------------------------------------------------------------------------------------------------------------------------|----|
| Hematologica<br>I System<br>Development<br>and Function | prolifer<br>ation   | proliferation of<br>leukocytes                | 2,92E-42 | IGHG1, IGHM, IKZF1, IL10RA, IL12RB1, IL2RB, IL2RG, IL7R, IRF1, IRF4, IRF8, ITGAL, ITGB2, ITK, JAK3, KLRD1, LAT2, LAX1, LCK, LCP2, LEF1, LTF, LYN, MAP4K1, PIK3CD, PLSCR1, POU2AF1, PRDM1, PRF1, PSMB9, PTPN22, PTPRC, RAB27A, RAC2, RASSF5, RUNX1, RUNX2, RUNX3, SH2D1A, SH2D2A, SIT1, SOCS3, STAT1, STAT4, STK4, TBX21, TLR4, TLR7, TNFRSF1B, TNFSF13B, TOX, TRA@, TRAT1, VAV1, XCL1                                                                                                                                                                                             | 88 |
| Hematologica<br>I System<br>Development<br>and Function | prolifer<br>ation   | proliferation of<br>mononuclear<br>leukocytes | 2,10E-41 | BTK, CBL, CCL4, CCND2, CCR2, CCR5, CD2, CD28, CD47, CD48, CD84, CD86, CD244, CD247, CD1D, CD3E, CD3G, CD8A, CLEC10A, CORO1A, CRTAM, CSF1R, CSF2RB, CTLA4, CXCR4, DOCK2, FAS, FYB, HCK, HGF, HIF1A, HLA-E, ICOS, IDO1, IGHG1, IGHM, IGKC, IKZF1, IL2RB, IL2RG, IL7R, IRF1, IRF4, IRF8, ISG20, ITGAL, ITGAM, ITGAX, ITGB2, ITK, JAK3, KLRD1, KLRK1, LCK, LCP2, LEF1, LST1, LY75, LY86, LY96, LYN, MAP3K1, PIK3CD, PRDM1, PRKCB, PTPRC, RAC2, RUNX3, SASH3, SH2D1A, SH2D2A, SLAMF7, SOCS3, SRGN, STAT1, STAT4, TLR4, TLR7, TNFRSF17, TNFRSF1B, TNFSF13B, TOX, TRA@, TRD@, VAV1, XCL1 | 85 |
| Hematologica<br>I System<br>Development<br>and Function | prolifer<br>ation   | proliferation of<br>lymphocytes               | 1,33E-40 | BTK, CBL, CCL4, CCND2, CCR2, CCR5, CD2, CD28, CD47, CD48, CD84, CD86, CD244, CD247, CD1D, CD3E, CD3G, CD8A, CLEC10A, CORO1A, CRTAM, CSF2RB, CTLA4, CXCR4, DOCK2, FAS, FYB, HCK, HIF1A, HLA-E, ICOS, IDO1, IGHG1, IGHM, IGKC, IKZF1, IL2RB, IL2RG, IL7R, IRF1, IRF4, IRF8, ISG20, ITGAL, ITGAM, ITGAX, ITGB2, ITK, JAK3, KLRD1, KLRK1, LCK, LCP2, LEF1, LST1, LY75, LY86, LY96, LYN, MAP3K1, PIK3CD, PRDM1, PRKCB, PTPRC, RAC2, RUNX3, SASH3, SH2D1A, SH2D2A, SLAMF7, SOCS3, SRGN, STAT1, STAT4, TLR4, TLR7, TNFRSF17, TNFRSF1B, TNFSF13B, TOX, TRA@, TRD@, VAV1, XCL1             | 84 |
| Hematologica<br>I System<br>Development<br>and Function | prolifer<br>ation   | proliferation of<br>T lymphocytes             | 1,20E-29 | CBL, CCL4, CCR2, CCR5, CD2, CD28, CD47, CD48, CD84, CD86, CD244, CD247, CD3E, CD3G, CD8A, CLEC10A, CORO1A, CRTAM, CSF2RB, CTLA4, CXCR4, DOCK2, FAS, FYB, HLA-E, ICOS, IDO1, IGHG1, IGHM, IKZF1, IL2RB, IL2RG, IL7R, ISG20, ITGAL, ITGAM, ITGAX, ITGB2, ITK, JAK3, KLRD1, KLRK1, LCK, LCP2, PIK3CD, PRDM1, PTPRC, RAC2, RUNX3, SASH3, SH2D1A, SH2D2A, SLAMF7, SOCS3, SRGN, STAT1, STAT4, TLR4, TNFRSF1B, TNFSF13B, TOX, TRA@, TRD@, VAV1, XCL1                                                                                                                                     | 64 |
| Hematologica<br>I System<br>Development<br>and Function | prolifer<br>ation   | proliferation of<br>B lymphocytes             | 6,03E-18 | BTK, CBL, CCND2, CD86, CD244, CD3E, CD8A, FAS, HCK, HIF1A, IGHM, IGKC, IL2RG, IL7R, IRF4, IRF8, LEF1, LY75, LY86, LY96, LYN, MAP3K1, PIK3CD, PRKCB, PTPRC, SASH3, SLAMF7, STAT1, TLR4, TLR7, TNFRSF17, TNFSF13B, VAV1                                                                                                                                                                                                                                                                                                                                                             | 33 |
| Hematologica<br>I System<br>Development<br>and Function | prolifer<br>ation   | proliferation of<br>leukocyte cell<br>lines   | 2,74E-08 | CD28, CD1D, CD3E, CD8A, CLEC7A, CSF1R, CSF2RB, DCK, HCK, IL10RA, IL12RB1, IL2RB, IL2RG, IL7R, JAK3, PTGER4, PTPRC, RUNX1, SOCS3, TNFRSF1B                                                                                                                                                                                                                                                                                                                                                                                                                                         | 20 |
| Hematologica<br>I System<br>Development<br>and Function | differe<br>ntiation | differentiation<br>of leukocytes              | 2,18E-37 | AHR, APAF1, BCL2A1, C1QC, CCL2, CCL19, CD2, CD28, CD47, CD86, CD1D, CD300A, CD3D, CD3E, CD8A, CD8B, CSF1R, CSF2RB, CTLA4, CXCR4, DOCK2, DUSP5, ETS1, FAS, GIMAP5, HDAC9 (includes EG:9734), HELLS, HGF, HLA-DOA, HLA-DQA1, ICOS, IFI16, IGHG1, IGHM, IKZF1, IL12RB1, IL2RB, IL2RG, IL7R, IRF1, IRF4, IRF8, ITGAL, ITGAM, ITGB2, ITGB6, ITK, JAK3, LCK, LCP2, LEF1, LYN, PIK3CD, PLSCR1, POU2AF1, PRDM1, PTPN22, PTPRC, RASSF5, RGS10, RUNX1, RUNX2, SH2D1A, SIT1, SOCS3, STAT1, STAT4, TBX21, TLR4, TLR7, TNFSF13B, TOX, TRA@, TRAT1, VAV1                                        | 75 |
| Hematologica<br>I System<br>Development<br>and Function | differe<br>ntiation | differentiation<br>of blood cells             | 1,65E-36 | AHR, APAF1, BCL2A1, C1QC, CCL2, CCL19, CD2, CD28, CD47, CD86, CD1D, CD300A, CD3D, CD3E, CD8A, CD8B, CSF1R, CSF2RB, CTLA4, CXCR4, DOCK2, DUSP5, ETS1, FAS, FLI1, GIMAP5, HCLS1, HDAC9 (includes EG:9734), HELLS, HGF, HIF1A, HLA-DOA, HLA-DQA1, ICOS, IFI16, IGHG1, IGHM, IKZF1, IL12RB1, IL2RB, IL2RG, IL7R, IRF1, IRF4, IRF8, ITGAL, ITGAM, ITGB2, ITGB6, ITK, JAK3, LCK, LCP2, LEF1, LYN, MAP4K1, PIK3CD, PLSCR1, POU2AF1, PRDM1, PTPN22, PTPRC, RASSF5, RGS10,                                                                                                                 | 79 |

|                                               |                 |                                             |          |                                                                                                                                                                                                                                                                                                                                                                                                                                                                       |    |
|-----------------------------------------------|-----------------|---------------------------------------------|----------|-----------------------------------------------------------------------------------------------------------------------------------------------------------------------------------------------------------------------------------------------------------------------------------------------------------------------------------------------------------------------------------------------------------------------------------------------------------------------|----|
|                                               |                 |                                             |          | RUNX1, RUNX2, SH2D1A, SIT1, SOCS3, STAT1, STAT4, TBX21, TLR4, TLR7, TNFSF13B, TOX, TRA@, TRAT1, VAV1                                                                                                                                                                                                                                                                                                                                                                  |    |
| Hematological System Development and Function | differentiation | differentiation of mononuclear leukocytes   | 8,74E-34 | AHR, APAF1, BCL2A1, CCL2, CCL19, CD2, CD28, CD86, CD1D, CD3D, CD3E, CD8A, CD8B, CSF1R, CTLA4, CXCR4, DOCK2, DUSP5, ETS1, FAS, GIMAP5, HDAC9 (includes EG:9734), HELLS, HGF, HLA-DOA, HLA-DQA1, ICOS, IFI16, IGHG1, IGHM, IKZF1, IL12RB1, IL2RB, IL2RG, IL7R, IRF1, IRF4, IRF8, ITGAL, ITGB2, ITK, JAK3, LCK, LCP2, LEF1, PIK3CD, POU2AF1, PRDM1, PTPN22, PTPRC, RASSF5, RUNX1, SH2D1A, SIT1, SOCS3, STAT1, STAT4, TBX21, TLR4, TLR7, TNFSF13B, TOX, TRA@, TRAT1, VAV1 | 65 |
| Hematological System Development and Function | differentiation | differentiation of lymphocytes              | 2,36E-32 | AHR, APAF1, BCL2A1, CCL19, CD2, CD28, CD86, CD1D, CD3D, CD3E, CD8A, CD8B, CTLA4, CXCR4, DOCK2, DUSP5, ETS1, FAS, GIMAP5, HDAC9 (includes EG:9734), HELLS, HLA-DOA, HLA-DQA1, ICOS, IGHG1, IGHM, IKZF1, IL12RB1, IL2RB, IL2RG, IL7R, IRF1, IRF4, IRF8, ITGAL, ITGB2, ITK, JAK3, LCK, LCP2, LEF1, PIK3CD, POU2AF1, PRDM1, PTPN22, PTPRC, RASSF5, RUNX1, SH2D1A, SIT1, SOCS3, STAT1, STAT4, TBX21, TLR4, TLR7, TNFSF13B, TOX, TRA@, TRAT1, VAV1                          | 61 |
| Hematological System Development and Function | differentiation | differentiation of T lymphocytes            | 3,33E-26 | AHR, APAF1, BCL2A1, CCL19, CD2, CD28, CD86, CD1D, CD3E, CD8A, CD8B, CTLA4, ETS1, GIMAP5, HLA-DOA, HLA-DQA1, ICOS, IGHG1, IKZF1, IL12RB1, IL2RB, IL2RG, IL7R, IRF1, IRF4, IRF8, ITGAL, ITGB2, ITK, JAK3, LCK, LCP2, LEF1, PIK3CD, PRDM1, PTPN22, PTPRC, RASSF5, RUNX1, SH2D1A, SOCS3, STAT1, STAT4, TBX21, TNFSF13B, TOX, TRA@, VAV1                                                                                                                                   | 48 |
| Hematological System Development and Function | differentiation | differentiation of helper T lymphocytes     | 3,76E-14 | AHR, CD28, CD86, CTLA4, ETS1, ICOS, IGHG1, IL12RB1, IL2RB, IRF1, IRF8, ITGAL, ITGB2, ITK, JAK3, PIK3CD, RUNX1, SH2D1A, STAT1, STAT4, TBX21, TNFSF13B, VAV1                                                                                                                                                                                                                                                                                                            | 23 |
| Hematological System Development and Function | differentiation | differentiation of Th2 cells                | 3,55E-12 | CD28, CD86, CTLA4, ICOS, IGHG1, IRF1, ITK, JAK3, PIK3CD, RUNX1, SH2D1A, STAT1, STAT4, TBX21, VAV1                                                                                                                                                                                                                                                                                                                                                                     | 15 |
| Hematological System Development and Function | differentiation | differentiation of Th1 cells                | 1,08E-08 | CD86, CTLA4, ICOS, IL12RB1, IRF1, IRF8, ITGAL, ITGB2, JAK3, PIK3CD, STAT1, STAT4, TBX21                                                                                                                                                                                                                                                                                                                                                                               | 13 |
| Hematological System Development and Function | differentiation | differentiation of B lymphocytes            | 3,90E-08 | CXCR4, DUSP5, HDAC9 (includes EG:9734), ICOS, IGHM, IKZF1, IL2RB, IL2RG, IL7R, IRF4, PIK3CD, POU2AF1, PRDM1, PTPRC, TLR4, TLR7, TNFSF13B                                                                                                                                                                                                                                                                                                                              | 17 |
| Hematological System Development and Function | differentiation | differentiation of thymocytes               | 1,06E-07 | APAF1, CD2, CD28, CD86, CD3E, CD8B, IKZF1, IL2RG, LCP2, TRA@                                                                                                                                                                                                                                                                                                                                                                                                          | 10 |
| Hematological System Development and Function | differentiation | differentiation of antigen presenting cells | 1,36E-07 | C1QC, CD47, CSF1R, CSF2RB, DUSP5, GIMAP5, HGF, IKZF1, IRF4, IRF8, ITGB6, LYN, PRDM1, RGS10, SOCS3, TLR4                                                                                                                                                                                                                                                                                                                                                               | 16 |
| Hematological System Development and Function | differentiation | differentiation of plasma cells             | 1,68E-06 | CXCR4, DUSP5, ICOS, IRF4, POU2AF1, PRDM1, TNFSF13B                                                                                                                                                                                                                                                                                                                                                                                                                    | 7  |
| Hematological System Development and Function | binding         | binding of leukocytes                       | 2,71E-25 | CCL2, CCL4, CCL5, CCL19, CCL21, CCR5, CD2, CD47, CD48, CD69, CD86, CD3E, CLEC10A, CTLA4, CXCL9, FAS, FCGR1A, FCGR2A, FCGR3B, FYB, HCK, HGF, ICOS, ITGAL, ITGAM, ITGAX, ITGB2, ITK, KLRK1, LCK, LCP2, LTF, LYN, PTPRC, SELPLG, STK4, TLR4, TNC                                                                                                                                                                                                                         | 38 |
| Hematological System Development and Function | binding         | binding of mononuclear leukocytes           | 7,65E-22 | CCL2, CCL4, CCL5, CCL19, CCL21, CCR5, CD2, CD47, CD69, CD86, CD3E, CLEC10A, CTLA4, CXCL9, FAS, FYB, HGF, ICOS, ITGAL, ITGAM, ITGB2, ITK, KLRK1, LCK, LCP2, SELPLG, STK4, TNC                                                                                                                                                                                                                                                                                          | 28 |
| Hematological System Development and Function | binding         | binding of lymphocytes                      | 2,04E-20 | CCL4, CCL5, CCL19, CCL21, CD2, CD47, CD69, CD86, CD3E, CLEC10A, CTLA4, CXCL9, FAS, FYB, HGF, ICOS, ITGAL, ITGB2, ITK, KLRK1, LCK, LCP2, SELPLG, STK4, TNC                                                                                                                                                                                                                                                                                                             | 25 |
| Hematological System Development and Function | binding         | binding of T lymphocytes                    | 9,76E-20 | CCL4, CCL5, CCL21, CD2, CD47, CD69, CD86, CLEC10A, CTLA4, CXCL9, FAS, FYB, ICOS, ITGAL, ITGB2, ITK, KLRK1, LCK, LCP2, SELPLG, STK4, TNC                                                                                                                                                                                                                                                                                                                               | 22 |



|                                               |               |                                           |          |                                                                                                                                                                                                                                                                                                                                                                                          |    |
|-----------------------------------------------|---------------|-------------------------------------------|----------|------------------------------------------------------------------------------------------------------------------------------------------------------------------------------------------------------------------------------------------------------------------------------------------------------------------------------------------------------------------------------------------|----|
| Hematological System Development and Function | binding       | binding of phagocytes                     | 2,76E-09 | CD2, CD69, CLEC10A, FCGR1A, FCGR2A, FCGR3B, HCK, ITGAL, ITGAM, ITGB2, LYN, PTPRC, SELPLG, TLR4                                                                                                                                                                                                                                                                                           | 14 |
| Hematological System Development and Function | binding       | binding of red blood cells                | 1,73E-07 | CD2, FCGR2A, FCGR3B, ITGAM, ITGB2, LTF                                                                                                                                                                                                                                                                                                                                                   | 6  |
| Hematological System Development and Function | binding       | binding of leukocyte cell lines           | 6,48E-07 | CD2, CD47, FYB, IGKC, ITGAL, ITGB2, LYN, STK4, TNC                                                                                                                                                                                                                                                                                                                                       | 9  |
| Hematological System Development and Function | binding       | binding of granulocytes                   | 6,53E-07 | CCL5, FCGR2A, FCGR3B, HCK, ITGAM, ITGB2, LTF, LYN, SELPLG, TLR4                                                                                                                                                                                                                                                                                                                          | 10 |
| Hematological System Development and Function | cell death    | cell death of T lymphocytes               | 5,52E-23 | APAF1, BCL2A1, CASP1, CCL4, CCL5, CCL19, CCR5, CD2, CD28, CD47, CD247, CD3E, CHEK2, CIITA, CLEC10A, CTLA4, CXCR4, EOMES, FAS, GIMAP5, GZMA, GZMB, ICOS, IDO1, IGHM, IL2RG, IL7R, ITK, JAK3, KLRD1, LCK, MAP4K1, PIK3CD, PRDM1, PRF1, PTPRC, RAC2, SH2D2A, STAT1, TBX21, TNFRSF1B, XCL1                                                                                                   | 42 |
| Hematological System Development and Function | cell death    | cell death of natural killer cells        | 8,80E-07 | CD2, EOMES, FAS, ITGAL, KLRD1, TBX21                                                                                                                                                                                                                                                                                                                                                     | 6  |
| Hematological System Development and Function | cell movement | cell movement of leukocytes               | 1,39E-20 | CASP1, CCL2, CCL4, CCL5, CCL19, CCL21, CCR2, CCR5, CCR6, CD2, CD28, CD47, CD48, CD86, CFH, CORO1A, CSF1R, CTLA4, CTSS, CX3CR1, CXCL6, CXCL9, CXCR4, FAS, FCER1G, FCGR2A, GNA13, HCK, HGF, HIF1A, IGHG1, IL12RB1, IL2RB, ITGAL, ITGAM, ITGAX, ITGB2, ITK, LYN, PIK3CD, POU2AF1, PRF1, PRKCB, PTGDR, PTGES, PTPRC, RAC2, RGS1, RUNX3, SELPLG, SERPINA3, SOCS3, STAT1, TLR4, TNFRSF1B, XCL1 | 56 |
| Hematological System Development and Function | cell movement | cell movement of phagocytes               | 4,85E-16 | CASP1, CCL2, CCL4, CCL5, CCL21, CCR2, CCR5, CCR6, CD28, CD47, CFH, CORO1A, CSF1R, CX3CR1, CXCL6, CXCL9, FAS, FCER1G, FCGR2A, HCK, HGF, HIF1A, IL12RB1, ITGAL, ITGAM, ITGAX, ITGB2, PIK3CD, PTGDR, PTGES, RAC2, SELPLG, SOCS3, TLR4, TNFRSF1B, XCL1                                                                                                                                       | 36 |
| Hematological System Development and Function | cell movement | cell movement of myeloid cells            | 9,97E-16 | CASP1, CCL2, CCL4, CCL5, CCL21, CCR2, CD2, CD28, CD47, CD48, CFH, CORO1A, CXCL6, CXCL9, FAS, FCER1G, FCGR2A, HCK, HGF, IL2RB, ITGAL, ITGAM, ITGAX, ITGB2, ITK, PIK3CD, PTGDR, PTPRC, RAC2, RUNX3, SELPLG, SOCS3, TLR4, TNFRSF1B, XCL1                                                                                                                                                    | 35 |
| Hematological System Development and Function | cell movement | cell movement of granulocytes             | 5,63E-15 | CASP1, CCL2, CCL4, CCL5, CCL21, CCR2, CD2, CD28, CD47, CD48, CFH, CORO1A, CXCL6, CXCL9, FAS, FCER1G, FCGR2A, HCK, HGF, IL2RB, ITGAL, ITGAM, ITGAX, ITGB2, ITK, PIK3CD, PTGDR, RAC2, RUNX3, SELPLG, SOCS3, TLR4, TNFRSF1B, XCL1                                                                                                                                                           | 34 |
| Hematological System Development and Function | cell movement | cell movement of mononuclear leukocytes   | 2,05E-14 | CCL2, CCL4, CCL5, CCL19, CCL21, CCR2, CCR5, CD28, CD47, CD86, CTLA4, CTSS, CXCL9, CXCR4, FAS, GNA13, IGHG1, ITGAL, ITGAX, ITGB2, ITK, PIK3CD, POU2AF1, PRF1, PRKCB, PTGDR, PTGES, RAC2, RGS1, SELPLG, SERPINA3, SOCS3, TLR4, XCL1                                                                                                                                                        | 34 |
| Hematological System Development and Function | cell movement | cell movement of neutrophils              | 2,82E-13 | CASP1, CCL2, CCL4, CCL5, CCL21, CCR2, CD28, CD47, CFH, CORO1A, CXCL6, FAS, FCER1G, FCGR2A, HCK, HGF, ITGAL, ITGAM, ITGAX, ITGB2, PIK3CD, PTGDR, RAC2, SELPLG, SOCS3, TLR4, TNFRSF1B, XCL1                                                                                                                                                                                                | 28 |
| Hematological System Development and Function | cell movement | cell movement of lymphocytes              | 1,59E-12 | CCL2, CCL4, CCL5, CCL19, CCL21, CCR2, CCR5, CD28, CD86, CTLA4, CXCL9, CXCR4, FAS, GNA13, IGHG1, ITGB2, ITK, PIK3CD, POU2AF1, PRF1, PTGDR, PTGES, RAC2, RGS1, SELPLG, SOCS3, TLR4, XCL1                                                                                                                                                                                                   | 28 |
| Hematological System Development and Function | cell movement | cell movement of antigen presenting cells | 8,60E-10 | CCL2, CCL4, CCL5, CCL19, CCL21, CCR2, CCR5, CCR6, CD86, CSF1R, CX3CR1, CXCL9, HGF, HIF1A, IL12RB1, ITGB2, PIK3CD, PTGDR, PTGES, RAC2, TLR4                                                                                                                                                                                                                                               | 21 |
| Hematological System Development and Function | cell movement | cell movement of T lymphocytes            | 8,64E-10 | CCL2, CCL4, CCL5, CCL19, CCL21, CCR2, CCR5, CD28, CD86, CTLA4, CXCL9, CXCR4, FAS, ITGB2, ITK, PRF1, SELPLG, SOCS3, TLR4, XCL1                                                                                                                                                                                                                                                            | 20 |
| Hematological System                          | cell movement | cell movement of B                        | 5,22E-08 | CCL19, CCL21, CCR2, CXCL9, PIK3CD, POU2AF1, RAC2, RGS1, SELPLG, TLR4                                                                                                                                                                                                                                                                                                                     | 10 |

|                                                  |               |                                       |          |                                                                                                                                                                                                                      |    |  |
|--------------------------------------------------|---------------|---------------------------------------|----------|----------------------------------------------------------------------------------------------------------------------------------------------------------------------------------------------------------------------|----|--|
| Development and Function<br>Hematological System | ent           | lymphocytes                           |          |                                                                                                                                                                                                                      |    |  |
| Development and Function<br>Hematological System | cell movement | cell movement of macrophages          | 6,26E-08 | CCL2, CCL4, CCL5, CCR2, CCR5, CCR6, CSF1R, CX3CR1, CXCL9, HGF, HIF1A, IL12RB1, ITGB2, PIK3CD, PTGES, RAC2                                                                                                            | 16 |  |
| Development and Function<br>Hematological System | cell movement | cell movement of memory T lymphocytes | 1,29E-07 | CCL2, CCL5, CCL19, CCL21, CD28, CXCL9, ITGB2                                                                                                                                                                         | 7  |  |
| Development and Function<br>Hematological System | cell movement | cell movement of eosinophils          | 1,67E-07 | CCL2, CCL5, CCL21, CD2, CD47, CD48, CXCL9, IL2RB, ITGAL, ITGAM, ITGB2, ITK, RUNX3                                                                                                                                    | 13 |  |
| Development and Function<br>Hematological System | cell movement | cell movement of mononuclear cells    | 1,63E-06 | CCL2, CCL4, CCR2, CCR5, CIITA, ICOS, JAK3, NFKBIZ                                                                                                                                                                    | 8  |  |
| Development and Function<br>Hematological System | interaction   | interaction of T lymphocytes          | 2,57E-19 | CCL4, CCL5, CCL21, CCR5, CD2, CD28, CD47, CD69, CD86, CLEC10A, CTLA4, CXCL9, FAS, FYB, ICOS, ITGAL, ITGB2, ITK, KLRK1, LCK, LCP2, SELPLG, STK4, TNC                                                                  | 24 |  |
| Development and Function<br>Hematological System | adhesion      | adhesion of leukocytes                | 5,56E-17 | BTK, C1QA, CCL2, CCL4, CCL5, CCL19, CCL21, CD2, CD28, CD47, CD48, CORO1A, CXCL9, FAS, FCGR2A, FYB, HCK, HGF, ICOS, ITGAL, ITGAM, ITGAX, ITGB2, ITK, LCP1, LYN, PIK3CD, PTPRC, RAC2, RASSF5, RGS1, SELPLG, TLR4, VAV1 | 34 |  |
| Development and Function<br>Hematological System | adhesion      | adhesion of mononuclear leukocytes    | 1,35E-16 | BTK, CCL2, CCL4, CCL5, CCL19, CCL21, CD2, CD28, CD47, CD48, CXCL9, FAS, FYB, HGF, ICOS, ITGAL, ITGAM, ITGAX, ITGB2, ITK, LCP1, RASSF5, RGS1, SELPLG, TLR4, VAV1                                                      | 26 |  |
| Development and Function<br>Hematological System | adhesion      | adhesion of lymphocytes               | 5,88E-14 | BTK, CCL2, CCL4, CCL19, CCL21, CD2, CD28, CD47, CD48, CXCL9, FAS, FYB, HGF, ICOS, ITGAL, ITGB2, ITK, RASSF5, RGS1, SELPLG, TLR4                                                                                      | 21 |  |
| Development and Function<br>Hematological System | adhesion      | adhesion of T lymphocytes             | 7,51E-12 | CCL4, CCL19, CCL21, CD2, CD47, CD48, CXCL9, FAS, FYB, HGF, ICOS, ITGAL, ITGB2, ITK, RASSF5, SELPLG, TLR4                                                                                                             | 17 |  |
| Development and Function<br>Hematological System | adhesion      | adhesion of neutrophils               | 4,19E-08 | CORO1A, ITGAL, ITGAM, ITGAX, ITGB2, LCP1, LYN, PIK3CD, SELPLG, TLR4, VAV1                                                                                                                                            | 11 |  |
| Development and Function<br>Hematological System | adhesion      | adhesion of granulocytes              | 3,07E-07 | CORO1A, HCK, ITGAL, ITGAM, ITGAX, ITGB2, LCP1, LYN, PIK3CD, SELPLG, TLR4, VAV1                                                                                                                                       | 12 |  |
| Development and Function<br>Hematological System | apoptosis     | apoptosis of T lymphocytes            | 3,12E-16 | BCL2A1, CASP1, CCL4, CCL5, CCR5, CD2, CD28, CD47, CD247, CD3E, CHEK2, CIITA, CTLA4, CXCR4, FAS, GIMAP5, GZMA, GZMB, ICOS, IL2RG, IL7R, ITK, JAK3, LCK, MAP4K1, PIK3CD, PRF1, PTPRC, RAC2, STAT1, TNFRSF1B, XCL1      | 32 |  |
| Development and Function<br>Hematological System | function      | function of lymphocytes               | 3,81E-16 | AHR, CD28, CD86, CTLA4, FCGR2A, ICOS, IL10RA, JAK3, KLRK1, LAX1, PIK3CD, PRF1, SH2D1A, STAT4, TLR4, TLR8 (includes EG:51311), TNFSF13B, TRA@, VAV1                                                                   | 19 |  |
| Development and Function<br>Hematological System | function      | function of T lymphocytes             | 1,75E-11 | CD28, CTLA4, ICOS, IL10RA, JAK3, LAX1, PIK3CD, PRF1, SH2D1A, STAT4, TLR4, TLR8 (includes EG:51311), TRA@, VAV1                                                                                                       | 14 |  |
| Development and Function<br>Hematological System | expansion     | expansion of lymphocytes              | 2,02E-15 | AHR, BTK, CBL, CCR6, CD2, CD28, CD86, CD244, CD3E, CTLA4, ICOS, IGHM, IL7R, IRF1, JAK3, LCP2, PIK3CD, PRF1, SRGN, STAT4, TNFRSF1B, TNFSF13B, TOX                                                                     | 23 |  |
| Development and Function<br>Hematological System | expansion     | expansion of T lymphocytes            | 6,68E-15 | AHR, CBL, CCR6, CD2, CD28, CD86, CD244, CD3E, CTLA4, ICOS, IGHM, IRF1, JAK3, LCP2, PIK3CD, PRF1, SRGN, STAT4, TNFRSF1B, TNFSF13B, TOX                                                                                | 21 |  |

## and Function

|                                               |             |                                         |          |                                                                                                                                                                                                                                    |    |
|-----------------------------------------------|-------------|-----------------------------------------|----------|------------------------------------------------------------------------------------------------------------------------------------------------------------------------------------------------------------------------------------|----|
| Hematological System Development and Function | growth      | growth of lymphocytes                   | 4,93E-15 | AHR, BTK, CBL, CCR6, CD2, CD28, CD86, CD244, CD3E, CTLA4, HIF1A, ICOS, IGHM, IL2RB, IL7R, IRF1, JAK3, LCP2, PIK3CD, PRF1, SRGN, STAT4, TNFRSF1B, TNFSF13B, TOX                                                                     | 25 |
| Hematological System Development and Function | survival    | survival of lymphocytes                 | 7,96E-15 | BTK, CD28, CD86, CD3E, CD8A, CHEK2, FAS, HCK, ICOS, IL2RB, IL2RG, JAK3, LAX1, LEF1, NCF2, PIK3CD, PRKCB, PTPRC, STAT1, STAT4, TNFRSF17, TNFRSF1B, TNFSF13B, TRA@                                                                   | 24 |
| Hematological System Development and Function | survival    | survival of T lymphocytes               | 5,54E-11 | CD28, CD86, CD3E, CD8A, CHEK2, FAS, ICOS, IL2RB, IL2RG, JAK3, LAX1, PTPRC, STAT1, STAT4, TNFRSF1B, TRA@                                                                                                                            | 16 |
| Hematological System Development and Function | survival    | survival of mast cells                  | 1,20E-08 | BCL2A1, BTK, CD300A, FCER1A, FCER1G, LAX1, LYN, RAC2                                                                                                                                                                               | 8  |
| Hematological System Development and Function | survival    | survival of neutrophils                 | 8,80E-07 | BCL2A1, CCL4, CSF2RB, FAS, HIF1A, LYN                                                                                                                                                                                              | 6  |
| Hematological System Development and Function | homing      | homing of leukocytes                    | 2,52E-14 | CCL2, CCL4, CCL5, CCL19, CCL21, CCR2, CCR5, CD28, CORO1A, CX3CR1, CXCL6, CXCL9, CXCR4, FCER1G, FCGR2A, GNA13, HCK, IGHG1, IL12RB1, ITGAL, ITGB2, LYN, PIK3CD, PRKCB, PTGDR, PTPRC, RAC2, RGS1, SELPLG, SERPINA3, SOCS3, TLR4, XCL1 | 34 |
| Hematological System Development and Function | homing      | homing of lymphocytes                   | 3,18E-10 | CCL2, CCL4, CCL5, CCL19, CCL21, CCR2, CCR5, CXCL9, CXCR4, GNA13, IGHG1, PIK3CD, PTGDR, RAC2, RGS1, SELPLG, SOCS3, TLR4, XCL1                                                                                                       | 19 |
| Hematological System Development and Function | homing      | homing of mononuclear leukocytes        | 3,40E-10 | CCL2, CCL4, CCL5, CCL19, CCL21, CCR2, CCR5, CXCL9, CXCR4, GNA13, IGHG1, ITGAL, PIK3CD, PRKCB, PTGDR, RAC2, RGS1, SELPLG, SERPINA3, SOCS3, TLR4, XCL1                                                                               | 22 |
| Hematological System Development and Function | homing      | homing of B lymphocytes                 | 1,83E-07 | CCL19, CCL21, CCR2, CXCL9, PIK3CD, RAC2, RGS1, TLR4                                                                                                                                                                                | 8  |
| Hematological System Development and Function | recruitment | recruitment of leukocytes               | 2,05E-13 | AHR, C3AR1, CCL2, CCL4, CCL5, CCL19, CCL21, CCR2, CCR5, CCR6, CD28, CD8A, CX3CR1, CXCL9, CXCR4, ETS1, FCER1A, HIF1A, IGHG1, ITGAM, ITGB2, LYZ, PIK3CD, SELPLG, TLR4, TLR7                                                          | 26 |
| Hematological System Development and Function | recruitment | recruitment of T lymphocytes            | 7,48E-10 | CCL2, CCL4, CCL5, CCL19, CCL21, CCR2, CCR6, CD8A, CXCL9, CXCR4, ETS1, FCER1A                                                                                                                                                       | 12 |
| Hematological System Development and Function | recruitment | recruitment of phagocytes               | 1,94E-09 | AHR, C3AR1, CCL2, CCL4, CCL5, CCL19, CCR2, CCR5, CD28, CD8A, CX3CR1, ETS1, ITGAM, ITGB2, LYZ, PIK3CD, TLR4                                                                                                                         | 17 |
| Hematological System Development and Function | recruitment | recruitment of lymphocytes              | 3,35E-09 | CCL2, CCL4, CCL5, CCL19, CCL21, CCR2, CCR6, CD8A, CX3CR1, CXCL9, CXCR4, ETS1, FCER1A                                                                                                                                               | 13 |
| Hematological System Development and Function | recruitment | recruitment of antigen presenting cells | 1,07E-08 | C3AR1, CCL2, CCL4, CCL5, CCL19, CCR2, CCR5, CD8A, CX3CR1, ETS1, ITGB2, TLR4                                                                                                                                                        | 12 |
| Hematological System Development and Function | recruitment | recruitment of granulocytes             | 1,10E-08 | AHR, C3AR1, CCL2, CCL4, CCL5, CCL19, CCR2, CD28, CD8A, CX3CR1, CXCL9, IGHG1, ITGAM, LYZ, PIK3CD, TLR4                                                                                                                              | 16 |
| Hematological System Development and Function | recruitment | recruitment of neutrophils              | 2,45E-08 | AHR, C3AR1, CCL2, CCL4, CCL5, CCL19, CCR2, CD28, CD8A, CX3CR1, ITGAM, LYZ, PIK3CD, TLR4                                                                                                                                            | 14 |

|                                                         |                  |                                            |          |                                                                                                                                                                                                                            |    |
|---------------------------------------------------------|------------------|--------------------------------------------|----------|----------------------------------------------------------------------------------------------------------------------------------------------------------------------------------------------------------------------------|----|
| Hematologica<br>I System<br>Development<br>and Function | recruit<br>ment  | recruitment of<br>macrophages              | 3,06E-07 | C3AR1, CCL2, CCL4, CCR2, CCR5, CD8A, CX3CR1, ETS1, ITGB2, TLR4                                                                                                                                                             | 10 |
| Hematologica<br>I System<br>Development<br>and Function | chemot<br>axis   | chemotaxis of<br>leukocytes                | 2,49E-13 | CCL2, CCL4, CCL5, CCL19, CCL21, CCR2, CCR5, CD28, CORO1A, CX3CR1, CXCL6, CXCL9, CXCR4, FCER1G, FCGR2A, GNA13, HCK, IL12RB1, ITGAL, ITGAM, ITGB2, LYN, PIK3CD, PRKCB, PTGDR, PTPRC, RAC2, RGS1, SERPINA3, SOCS3, TLR4, XCL1 | 32 |
| Hematologica<br>I System<br>Development<br>and Function | chemot<br>axis   | chemotaxis of<br>mononuclear<br>leukocytes | 1,60E-08 | CCL2, CCL4, CCL5, CCL19, CCL21, CCR2, CCR5, CXCL9, CXCR4, GNA13, ITGAL, PRKCB, PTGDR, RAC2, RGS1, SERPINA3, SOCS3, TLR4, XCL1                                                                                              | 19 |
| Hematologica<br>I System<br>Development<br>and Function | chemot<br>axis   | chemotaxis of<br>lymphocytes               | 1,63E-08 | CCL2, CCL4, CCL5, CCL19, CCL21, CCR2, CCR5, CXCL9, CXCR4, GNA13, PTGDR, RAC2, RGS1, SOCS3, TLR4, XCL1                                                                                                                      | 16 |
| Hematologica<br>I System<br>Development<br>and Function | chemot<br>axis   | chemotaxis of<br>phagocytes                | 2,48E-08 | CCL2, CCL4, CCL5, CD28, CORO1A, CX3CR1, CXCL6, CXCL9, FCER1G, FCGR2A, HCK, IL12RB1, ITGAM, ITGB2, PIK3CD, RAC2, XCL1                                                                                                       | 17 |
| Hematologica<br>I System<br>Development<br>and Function | chemot<br>axis   | chemotaxis of<br>myeloid cells             | 1,27E-06 | CCL2, CCL4, CCL5, CD28, CORO1A, CXCL6, CXCL9, FCER1G, FCGR2A, HCK, ITGAM, ITGB2, PTPRC, RAC2, XCL1                                                                                                                         | 15 |
| Hematologica<br>I System<br>Development<br>and Function | chemot<br>axis   | chemotaxis of<br>neutrophils               | 1,41E-06 | CCL2, CCL4, CCL5, CD28, CORO1A, CXCL6, FCER1G, FCGR2A, HCK, ITGAM, ITGB2, RAC2, XCL1                                                                                                                                       | 13 |
| Hematologica<br>I System<br>Development<br>and Function | chemot<br>axis   | chemotaxis of<br>B lymphocytes             | 1,68E-06 | CCL19, CCL21, CCR2, CXCL9, RAC2, RGS1, TLR4                                                                                                                                                                                | 7  |
| Hematologica<br>I System<br>Development<br>and Function | respon<br>se     | response of<br>lymphocytes                 | 2,46E-12 | CCL19, CCL21, CD28, CD86, CD1D, CD3E, CTLA4, CXCL9, DAPP1, GZMB, ICOS, IL10RA, IL12RB1, ITK, LAX1, PSMB10, SELPLG, STAT4, TBX21                                                                                            | 19 |
| Hematologica<br>I System<br>Development<br>and Function | respon<br>se     | T cell response                            | 2,11E-11 | CCL19, CCL21, CD28, CD86, CD1D, CD3E, CTLA4, CXCL9, ICOS, IL10RA, IL12RB1, ITK, LAX1, PSMB10, SELPLG, STAT4, TBX21                                                                                                         | 17 |
| Hematologica<br>I System<br>Development<br>and Function | generat<br>ion   | generation of<br>lymphocytes               | 1,15E-11 | CD28, CD86, HLA-DQB1, ICOS, IL10RA, IL12RB1, IL2RG, IL7R, IRF4, ITK, JAK3, PSMB9, SOCS3, STAT4, TBX21, TLR4, TNFSF13B                                                                                                      | 17 |
| Hematologica<br>I System<br>Development<br>and Function | generat<br>ion   | generation of<br>T lymphocytes             | 2,92E-11 | CD28, CD86, HLA-DQB1, ICOS, IL10RA, IL12RB1, IL2RG, ITK, JAK3, PSMB9, SOCS3, STAT4, TBX21, TLR4, TNFSF13B                                                                                                                  | 15 |
| Hematologica<br>I System<br>Development<br>and Function | generat<br>ion   | generation of<br>helper T<br>lymphocytes   | 6,36E-07 | CD28, IL12RB1, JAK3, SOCS3, STAT4, TBX21, TNFSF13B                                                                                                                                                                         | 7  |
| Hematologica<br>I System<br>Development<br>and Function | generat<br>ion   | generation of<br>Th1 cells                 | 1,02E-06 | CD28, IL12RB1, JAK3, STAT4, TBX21                                                                                                                                                                                          | 5  |
| Hematologica<br>I System<br>Development<br>and Function | selectio<br>n    | selection of T<br>lymphocytes              | 1,38E-11 | CD28, CD1D, CD3D, CD3E, DOCK2, FAS, HLA-DOA, ITK, PTPRC, SIT1, TRAT1, VAV1                                                                                                                                                 | 12 |
| Hematologica<br>I System<br>Development<br>and Function | accumu<br>lation | accumulation<br>of leukocytes              | 1,48E-11 | CCL2, CCL5, CCL21, CCR2, CCR5, CD28, CD86, CD1D, CTLA4, CX3CR1, CXCL9, CYBB, FAS, ICOS, IL10RA, IL2RG, ITGAL, ITGAM, ITGAX, ITGB2, RUNX3, SELPLG, SH2D2A, TLR4                                                             | 24 |
| Hematologica                                            | accumu           | accumulation                               | 2,17E-10 | CCL5, CCL21, CCR5, CD28, CD86, CD1D, CTLA4, FAS, ICOS, IL10RA, IL2RG,                                                                                                                                                      | 15 |

|                                                |                               |                                                |          |                                                                                                                                    |    |
|------------------------------------------------|-------------------------------|------------------------------------------------|----------|------------------------------------------------------------------------------------------------------------------------------------|----|
| I System Development and Function              | lation                        | of lymphocytes                                 |          | ITGAL, ITGB2, RUNX3, SH2D2A                                                                                                        |    |
| Hematologica I System Development and Function | accumulation                  | accumulation of T lymphocytes                  | 4,33E-10 | CCL5, CCL21, CCR5, CD28, CD86, CTLA4, FAS, ICOS, IL10RA, IL2RG, ITGAL, RUNX3, SH2D2A                                               | 13 |
| Hematologica I System Development and Function | accumulation                  | accumulation of macrophages                    | 8,02E-07 | CCL2, CCL5, CCR2, CD28, CX3CR1, FAS, ITGAM, ITGAX, TLR4                                                                            | 9  |
| Hematologica I System Development and Function | transmigration                | transmigration of leukocytes                   | 7,97E-11 | CCL2, CCL4, CCL5, CCL19, CD28, CD47, CD86, CTSS, CXCL9, CXCR4, ITGAL, ITGAM, ITGAX, ITGB2, PIK3CD, PTGDR, TLR4                     | 17 |
| Hematologica I System Development and Function | transmigration                | transmigration of mononuclear leukocytes       | 1,71E-08 | CCL2, CCL4, CCL5, CD28, CD47, CD86, CTSS, CXCR4, ITGAL, ITGAX, ITGB2                                                               | 11 |
| Hematologica I System Development and Function | transmigration                | transmigration of granulocytes                 | 6,48E-07 | CD47, CXCL9, ITGAL, ITGAM, ITGAX, ITGB2, PIK3CD, PTGDR, TLR4                                                                       | 9  |
| Hematologica I System Development and Function | transmigration                | transmigration of neutrophils                  | 7,77E-07 | CD47, ITGAL, ITGAM, ITGAX, ITGB2, PIK3CD, PTGDR, TLR4                                                                              | 8  |
| Hematologica I System Development and Function | phagocytosis                  | phagocytosis of myeloid cells                  | 6,32E-10 | CD47, CORO1A, CSF2RB, FCGR2A, FCGR3B, IRF8, ITGAM, ITGB2, SELPLG, TLR4                                                             | 10 |
| Hematologica I System Development and Function | phagocytosis                  | phagocytosis of neutrophils                    | 4,30E-09 | CD47, CORO1A, CSF2RB, FCGR2A, FCGR3B, ITGAM, ITGB2, SELPLG, TLR4                                                                   | 9  |
| Hematologica I System Development and Function | phagocytosis                  | phagocytosis of red blood cells                | 4,43E-07 | FCGR1A, FCGR2A, HCK, ITGAM, ITGB2, LYN, RAC2                                                                                       | 7  |
| Hematologica I System Development and Function | activation-induced cell death | activation-induced cell death of T lymphocytes | 1,39E-09 | CCR5, CD28, CD3E, CIITA, FAS, ITK, MAP4K1, PRF1, RAC2, STAT1                                                                       | 10 |
| Hematologica I System Development and Function | aggregation                   | aggregation of blood cells                     | 5,16E-09 | BTK, CCL5, CD47, CXCL9, FCER1G, FCGR2A, GNA13, HCLS1, HIF1A, IGHM, ITGAL, ITGAM, ITGB2, LCK, LCP2, LYN, PTGER4, SELPLG, TLR4, VAV1 | 20 |
| Hematologica I System Development and Function | aggregation                   | aggregation of leukocyte cell lines            | 1,99E-06 | CD2, CD47, ITGAL, ITGAM, ITGB2                                                                                                     | 5  |
| Hematologica I System Development and Function | attraction                    | attraction of T lymphocytes                    | 9,44E-09 | CCL2, CCL4, CCL5, CCL19, CCL21, CCR5, CXCL9, TLR4, XCL1                                                                            | 9  |
| Hematologica I System Development and Function | infiltration                  | infiltration by neutrophils                    | 9,60E-09 | CASP1, CCL4, CCL21, CCR2, CFH, FAS, FCER1G, HGF, ITGAL, ITGAM, ITGB2, RAC2, SOCS3, TLR4, TNFRSF1B, XCL1                            | 16 |
| Hematologica I System Development and Function | infiltration                  | infiltration of leukocytes                     | 3,61E-08 | CCL2, CCL4, CCL19, CCL21, CCR2, CCR5, CD86, CSF1R, CTLA4, FAS, HIF1A, ITGAM, ITK, PRF1, PTGES, SELPLG, STAT1, TLR4, TNFRSF1B, XCL1 | 20 |
| Hematologica I System Development and Function | infiltration                  | infiltration by                                | 1,38E-07 | CCL19, CCL21, CCR2, CCR5, CD86, CTLA4, FAS, ITK, PRF1, SELPLG, XCL1                                                                | 11 |

|                                                |                   |                                              |          |                                                                                                                                                                                                                                                                                                                                                                                                                                                                                                                                                                                                                                                                  |    |  |
|------------------------------------------------|-------------------|----------------------------------------------|----------|------------------------------------------------------------------------------------------------------------------------------------------------------------------------------------------------------------------------------------------------------------------------------------------------------------------------------------------------------------------------------------------------------------------------------------------------------------------------------------------------------------------------------------------------------------------------------------------------------------------------------------------------------------------|----|--|
| I System Development and Function              | ion               | T lymphocytes                                |          |                                                                                                                                                                                                                                                                                                                                                                                                                                                                                                                                                                                                                                                                  |    |  |
| Hematologica I System Development and Function | polarization      | polarization of T lymphocytes                | 1,71E-08 | CCL19, CD28, CTLA4, ICOS, IL12RB1, IRF4, LCK, RASSF5, STAT4, TBX21, VAV1                                                                                                                                                                                                                                                                                                                                                                                                                                                                                                                                                                                         | 11 |  |
| Hematologica I System Development and Function | maturati on       | maturation of lymphocytes                    | 1,80E-08 | AHR, BTK, CD28, CD86, CD247, HIF1A, IGHM, ITK, LCK, PTPRC, RUNX1, RUNX3, TBX21, TNFSF13B, VAV1                                                                                                                                                                                                                                                                                                                                                                                                                                                                                                                                                                   | 15 |  |
| Hematologica I System Development and Function | chemo attracti on | chemoattracti on of antigen presenting cells | 1,29E-07 | CCL2, CCL4, CCL5, CCL19, CXCL9, IL12RB1, TLR4                                                                                                                                                                                                                                                                                                                                                                                                                                                                                                                                                                                                                    | 7  |  |
| Hematologica I System Development and Function | chemo attracti on | chemoattracti on of macrophages              | 1,02E-06 | CCL2, CCL4, CCL5, CXCL9, IL12RB1                                                                                                                                                                                                                                                                                                                                                                                                                                                                                                                                                                                                                                 | 5  |  |
| Hematologica I System Development and Function | trafficki ng      | trafficking of leukocytes                    | 4,51E-07 | CCL4, CCL5, CCL19, CCR2, CCR5, ITGB2, TLR4, TNFRSF1B                                                                                                                                                                                                                                                                                                                                                                                                                                                                                                                                                                                                             | 8  |  |
| Hematologica I System Development and Function | extrava sation    | extravasati on of antigen presenting cells   | 4,61E-07 | CCL2, CCL4, CCL5, CCR2, CCR5                                                                                                                                                                                                                                                                                                                                                                                                                                                                                                                                                                                                                                     | 5  |  |
| Hematologica I System Development and Function | signalin g        | signaling of T lymphocytes                   | 5,39E-07 | IL2RB, IL2RG, ITGB2, LCP2, PIK3CD, SH2D1A                                                                                                                                                                                                                                                                                                                                                                                                                                                                                                                                                                                                                        | 6  |  |
| Hematologica I System Development and Function | presen ce         | presence of leukocytes                       | 6,36E-07 | CCL19, CCL21, CCR6, CXCR4, HCK, ITGAM, JAK3                                                                                                                                                                                                                                                                                                                                                                                                                                                                                                                                                                                                                      | 7  |  |
| Hematologica I System Development and Function | presen ce         | presence of mononuclear leukocytes           | 8,80E-07 | CCL19, CCL21, CCR6, CXCR4, ITGAM, JAK3                                                                                                                                                                                                                                                                                                                                                                                                                                                                                                                                                                                                                           | 6  |  |
| Hematologica I System Development and Function | stimula ti on     | stimulation of T lymphocytes                 | 6,53E-07 | CD2, CD28, CD86, CD1D, FAS, ICOS, KLRD1, KLRK1, PTPRC, TNFSF13B                                                                                                                                                                                                                                                                                                                                                                                                                                                                                                                                                                                                  | 10 |  |
| Hematopoiesi s                                 | develo pment      | development of lymphocytes                   | 3,56E-48 | AHR, APAF1, BCL11B, BCL2A1, BTK, CASP1, CBL, CCL4, CCL5, CCL19, CCR5, CD2, CD28, CD47, CD69, CD86, CD247, CD1D, CD3D, CD3E, CD3G, CD8A, CD8B, CHEK2, CIITA, CLEC10A, CTLA4, CXCR4, DCK, DOCK2, EOMES, ETS1, FAS, FCER1G, FCGR2A, GIMAP5, GZMA, GZMB, HIF1A, HLA-DOA, HLA-DQA1, HLA-DQB1, ICOS, IDO1, IGHG1, IGHM, IKZF1, IL10RA, IL12RB1, IL2RB, IL2RG, IL7R, IRF1, IRF4, IRF8, ITGAL, ITGB2, ITK, JAK3, KLRD1, LAT2, LAX1, LCK, LCP2, LEF1, LYN, MAP4K1, PIK3CD, POU2AF1, PRDM1, PRF1, PSMB9, PTPN22, PTPRC, RAC2, RASSF5, RUNX1, RUNX2, RUNX3, SH2D1A, SH2D2A, SIT1, SOCS3, STAT1, STAT4, TBX21, TLR4, TNFRSF1B, TNFSF13B, TOX, TRA@, TRAT1, VAV1, XCL1        | 94 |  |
| Hematopoiesi s                                 | develo pment      | development of leukocytes                    | 7,69E-48 | AHR, APAF1, BCL11B, BCL2A1, BTK, CASP1, CBL, CCL4, CCL5, CCL19, CCR5, CD2, CD28, CD47, CD69, CD86, CD247, CD1D, CD3D, CD3E, CD3G, CD8A, CD8B, CHEK2, CIITA, CLEC10A, CSF1R, CTLA4, CXCR4, DCK, DOCK2, EOMES, ETS1, FAS, FCER1G, FCGR2A, GIMAP5, GZMA, GZMB, HIF1A, HLA-DOA, HLA-DQA1, HLA-DQB1, ICOS, IDO1, IGHG1, IGHM, IKZF1, IL10RA, IL12RB1, IL2RB, IL2RG, IL7R, IRF1, IRF4, IRF8, ITGAL, ITGB2, ITK, JAK3, KLRD1, LAT2, LAX1, LCK, LCP2, LEF1, LYN, MAP4K1, PIK3CD, POU2AF1, PRDM1, PRF1, PSMB9, PTPN22, PTPRC, RAC2, RASSF5, RUNX1, RUNX2, RUNX3, SH2D1A, SH2D2A, SIT1, SOCS3, STAT1, STAT4, TBX21, TLR4, TNFRSF1B, TNFSF13B, TOX, TRA@, TRAT1, VAV1, XCL1 | 95 |  |
| Hematopoiesi s                                 | develo pment      | T cell development                           | 2,65E-45 | AHR, APAF1, BCL11B, BCL2A1, CASP1, CBL, CCL4, CCL5, CCL19, CCR5, CD2, CD28, CD47, CD86, CD247, CD1D, CD3D, CD3E, CD3G, CD8A, CD8B,                                                                                                                                                                                                                                                                                                                                                                                                                                                                                                                               | 88 |  |

|               |                 |                                           |          |                                                                                                                                                                                                                                                                                                                                                                                                                                                                                                                                                                                                                                                                                                                                                       |     |
|---------------|-----------------|-------------------------------------------|----------|-------------------------------------------------------------------------------------------------------------------------------------------------------------------------------------------------------------------------------------------------------------------------------------------------------------------------------------------------------------------------------------------------------------------------------------------------------------------------------------------------------------------------------------------------------------------------------------------------------------------------------------------------------------------------------------------------------------------------------------------------------|-----|
|               |                 |                                           |          | CHEK2, CIITA, CLEC10A, CTLA4, CXCR4, DOCK2, EOMES, ETS1, FAS, FCER1G, FCGR2A, GIMAP5, GZMA, GZMB, HLA-DOA, HLA-DQA1, HLA-DQB1, ICOS, IDO1, IGHG1, IGHM, IKZF1, IL10RA, IL12RB1, IL2RB, IL2RG, IL7R, IRF1, IRF4, IRF8, ITGAL, ITGB2, ITK, JAK3, KLRD1, LAT2, LAX1, LCK, LCP2, LEF1, MAP4K1, PIK3CD, PRDM1, PRF1, PSMB9, PTPN22, PTPRC, RAC2, RASSF5, RUNX1, RUNX2, RUNX3, SH2D1A, SH2D2A, SIT1, SOCS3, STAT1, STAT4, TBX21, TLR4, TNFRSF1B, TNFSF13B, TOX, TRA@, TRAT1, VAV1, XCL1                                                                                                                                                                                                                                                                     |     |
| Hematopoiesis | development     | development of thymocytes                 | 4,63E-12 | CD3D, CD3E, CD3G, CXCR4, ETS1, IL2RB, IL2RG, IL7R, IRF1, LAT2, LAX1, LCP2, PTPRC, SIT1, TRA@, TRAT1                                                                                                                                                                                                                                                                                                                                                                                                                                                                                                                                                                                                                                                   | 16  |
| Hematopoiesis | development     | development of helper T lymphocytes       | 8,61E-11 | AHR, CASP1, CD28, CD86, ICOS, IL12RB1, IRF1, ITGB2, ITK, SOCS3, STAT1, STAT4, TBX21                                                                                                                                                                                                                                                                                                                                                                                                                                                                                                                                                                                                                                                                   | 13  |
| Hematopoiesis | development     | development of B lymphocytes              | 3,12E-10 | BTK, CBL, CD69, CXCR4, DCK, HIF1A, IGHM, IL2RG, IL7R, JAK3, LYN, PIK3CD, POU2AF1, PRDM1, TNFSF13B, VAV1                                                                                                                                                                                                                                                                                                                                                                                                                                                                                                                                                                                                                                               | 16  |
| Hematopoiesis | development     | arrest in development of lymphocytes      | 1,73E-07 | BTK, CBL, CD3D, CXCR4, LCK, LCP2                                                                                                                                                                                                                                                                                                                                                                                                                                                                                                                                                                                                                                                                                                                      | 6   |
| Hematopoiesis | development     | NK cell development                       | 6,40E-07 | CD2, CD1D, EOMES, FAS, FCGR2A, IKZF1, IRF1, ITGAL, JAK3, KLRD1, TBX21                                                                                                                                                                                                                                                                                                                                                                                                                                                                                                                                                                                                                                                                                 | 11  |
| Hematopoiesis | development     | arrest in development of T lymphocytes    | 1,02E-06 | CBL, CD3D, CXCR4, LCK, LCP2                                                                                                                                                                                                                                                                                                                                                                                                                                                                                                                                                                                                                                                                                                                           | 5   |
| Hematopoiesis | development     | development of gamma-delta T lymphocytes  | 1,76E-06 | CD3D, CD3G, IL2RG, JAK3                                                                                                                                                                                                                                                                                                                                                                                                                                                                                                                                                                                                                                                                                                                               | 4   |
| Hematopoiesis | hematopoiesis   | hematopoiesis                             | 1,07E-46 | AHR, APAF1, BCL11B, BCL2A1, BTK, C1QC, CASP1, CBL, CCL4, CCL5, CCL19, CCR2, CCR5, CD2, CD28, CD47, CD69, CD86, CD247, CD1D, CD3D, CD3E, CD3G, CD8A, CD8B, CHEK2, CIITA, CLEC10A, CSF1R, CSF2RB, CTLA4, CXCR4, DCK, DOCK2, DUSP5, EOMES, ETS1, FAS, FCER1G, FCGR2A, GIMAP5, GZMA, GZMB, HDAC9 (includes EG:9734), HELLS, HIF1A, HLA-DOA, HLA-DQA1, HLA-DQB1, ICOS, IDO1, IGHG1, IGHM, IKZF1, IL10RA, IL12RB1, IL2RB, IL2RG, IL7R, IRF1, IRF4, IRF8, ITGAL, ITGB2, ITK, JAK3, KLRD1, LAT2, LAX1, LCK, LCP2, LEF1, LTF, LYN, MAP4K1, PIK3CD, PLSCR1, POU2AF1, PRDM1, PRF1, PSMB9, PTPN22, PTPRC, RAC2, RASSF5, RUNX1, RUNX2, RUNX3, SH2D1A, SH2D2A, SIT1, SOCS3, STAT1, STAT4, STK4, TBX21, TLR4, TLR7, TNFRSF1B, TNFSF13B, TOX, TRA@, TRAT1, VAV1, XCL1 | 105 |
| Hematopoiesis | differentiation | differentiation of leukocytes             | 2,18E-37 | AHR, APAF1, BCL2A1, C1QC, CCL2, CCL19, CD2, CD28, CD47, CD86, CD1D, CD300A, CD3D, CD3E, CD8A, CD8B, CSF1R, CSF2RB, CTLA4, CXCR4, DOCK2, DUSP5, ETS1, FAS, GIMAP5, HDAC9 (includes EG:9734), HELLS, HGF, HLA-DOA, HLA-DQA1, ICOS, IFI16, IGHG1, IGHM, IKZF1, IL12RB1, IL2RB, IL2RG, IL7R, IRF1, IRF4, IRF8, ITGAL, ITGAM, ITGB2, ITGB6, ITK, JAK3, LCK, LCP2, LEF1, LYN, PIK3CD, PLSCR1, POU2AF1, PRDM1, PTPN22, PTPRC, RASSF5, RGS10, RUNX1, RUNX2, SH2D1A, SIT1, SOCS3, STAT1, STAT4, TBX21, TLR4, TLR7, TNFSF13B, TOX, TRA@, TRAT1, VAV1                                                                                                                                                                                                            | 75  |
| Hematopoiesis | differentiation | differentiation of mononuclear leukocytes | 8,74E-34 | AHR, APAF1, BCL2A1, CCL2, CCL19, CD2, CD28, CD86, CD1D, CD3D, CD3E, CD8A, CD8B, CSF1R, CTLA4, CXCR4, DOCK2, DUSP5, ETS1, FAS, GIMAP5, HDAC9 (includes EG:9734), HELLS, HGF, HLA-DOA, HLA-DQA1, ICOS, IFI16, IGHG1, IGHM, IKZF1, IL12RB1, IL2RB, IL2RG, IL7R, IRF1, IRF4, IRF8, ITGAL, ITGB2, ITK, JAK3, LCK, LCP2, LEF1, PIK3CD, POU2AF1, PRDM1, PTPN22, PTPRC, RASSF5, RUNX1, SH2D1A, SIT1, SOCS3, STAT1, STAT4, TBX21, TLR4, TLR7, TNFSF13B, TOX, TRA@, TRAT1, VAV1                                                                                                                                                                                                                                                                                 | 65  |
| Hematopoiesis | differentiation | differentiation of lymphocytes            | 2,36E-32 | AHR, APAF1, BCL2A1, CCL19, CD2, CD28, CD86, CD1D, CD3D, CD3E, CD8A, CD8B, CTLA4, CXCR4, DOCK2, DUSP5, ETS1, FAS, GIMAP5, HDAC9 (includes EG:9734), HELLS, HLA-DOA, HLA-DQA1, ICOS, IGHG1, IGHM, IKZF1, IL12RB1, IL2RB, IL2RG, IL7R, IRF1, IRF4, IRF8, ITGAL, ITGB2, ITK, JAK3, LCK, LCP2, LEF1, PIK3CD, POU2AF1, PRDM1, PTPN22, PTPRC, RASSF5, RUNX1, SH2D1A, SIT1, SOCS3, STAT1, STAT4, TBX21, TLR4, TLR7, TNFSF13B, TOX, TRA@, TRAT1, VAV1                                                                                                                                                                                                                                                                                                          | 61  |

|               |                               |                                                |          |                                                                                                                                                                                                                                                                                                                                     |    |
|---------------|-------------------------------|------------------------------------------------|----------|-------------------------------------------------------------------------------------------------------------------------------------------------------------------------------------------------------------------------------------------------------------------------------------------------------------------------------------|----|
| Hematopoiesis | differentiation               | differentiation of T lymphocytes               | 3,33E-26 | AHR, APAF1, BCL2A1, CCL19, CD2, CD28, CD86, CD1D, CD3E, CD8A, CD8B, CTLA4, ETS1, GIMAP5, HLA-DOA, HLA-DQA1, ICOS, IGHG1, IKZF1, IL12RB1, IL2RB, IL2RG, IL7R, IRF1, IRF4, IRF8, ITGAL, ITGB2, ITK, JAK3, LCK, LCP2, LEF1, PIK3CD, PRDM1, PTPN22, PTPRC, RASSF5, RUNX1, SH2D1A, SOCS3, STAT1, STAT4, TBX21, TNFSF13B, TOX, TRA@, VAV1 | 48 |
| Hematopoiesis | differentiation               | differentiation of helper T lymphocytes        | 3,76E-14 | AHR, CD28, CD86, CTLA4, ETS1, ICOS, IGHG1, IL12RB1, IL2RB, IRF1, IRF8, ITGAL, ITGB2, ITK, JAK3, PIK3CD, RUNX1, SH2D1A, STAT1, STAT4, TBX21, TNFSF13B, VAV1                                                                                                                                                                          | 23 |
| Hematopoiesis | differentiation               | differentiation of Th2 cells                   | 3,55E-12 | CD28, CD86, CTLA4, ICOS, IGHG1, IRF1, ITK, JAK3, PIK3CD, RUNX1, SH2D1A, STAT1, STAT4, TBX21, VAV1                                                                                                                                                                                                                                   | 15 |
| Hematopoiesis | differentiation               | differentiation of Th1 cells                   | 1,08E-08 | CD86, CTLA4, ICOS, IL12RB1, IRF1, IRF8, ITGAL, ITGB2, JAK3, PIK3CD, STAT1, STAT4, TBX21                                                                                                                                                                                                                                             | 13 |
| Hematopoiesis | differentiation               | differentiation of B lymphocytes               | 3,90E-08 | CXCR4, DUSP5, HDAC9 (includes EG:9734), ICOS, IGHM, IKZF1, IL2RB, IL2RG, IL7R, IRF4, PIK3CD, POU2AF1, PRDM1, PTPRC, TLR4, TLR7, TNFSF13B                                                                                                                                                                                            | 17 |
| Hematopoiesis | differentiation               | differentiation of thymocytes                  | 1,06E-07 | APAF1, CD2, CD28, CD86, CD3E, CD8B, IKZF1, IL2RG, LCP2, TRA@                                                                                                                                                                                                                                                                        | 10 |
| Hematopoiesis | differentiation               | differentiation of antigen presenting cells    | 1,36E-07 | C1QC, CD47, CSF1R, CSF2RB, DUSP5, GIMAP5, HGF, IKZF1, IRF4, IRF8, ITGB6, LYN, PRDM1, RGS10, SOCS3, TLR4                                                                                                                                                                                                                             | 16 |
| Hematopoiesis | differentiation               | differentiation of plasma cells                | 1,68E-06 | CXCR4, DUSP5, ICOS, IRF4, POU2AF1, PRDM1, TNFSF13B                                                                                                                                                                                                                                                                                  | 7  |
| Hematopoiesis | cell death                    | cell death of T lymphocytes                    | 5,52E-23 | APAF1, BCL2A1, CASP1, CCL4, CCL5, CCL19, CCR5, CD2, CD28, CD47, CD247, CD3E, CHEK2, CIITA, CLEC10A, CTLA4, CXCR4, EOMES, FAS, GIMAP5, GZMA, GZMB, ICOS, IDO1, IGHM, IL2RG, IL7R, ITK, JAK3, KLRD1, LCK, MAP4K1, PIK3CD, PRDM1, PRF1, PTPRC, RAC2, SH2D2A, STAT1, TBX21, TNFRSF1B, XCL1                                              | 42 |
| Hematopoiesis | cell death                    | cell death of natural killer cells             | 8,80E-07 | CD2, EOMES, FAS, ITGAL, KLRD1, TBX21                                                                                                                                                                                                                                                                                                | 6  |
| Hematopoiesis | apoptosis                     | apoptosis of T lymphocytes                     | 3,12E-16 | BCL2A1, CASP1, CCL4, CCL5, CCR5, CD2, CD28, CD47, CD247, CD3E, CHEK2, CIITA, CTLA4, CXCR4, FAS, GIMAP5, GZMA, GZMB, ICOS, IL2RG, IL7R, ITK, JAK3, LCK, MAP4K1, PIK3CD, PRF1, PTPRC, RAC2, STAT1, TNFRSF1B, XCL1                                                                                                                     | 32 |
| Hematopoiesis | selection                     | selection of T lymphocytes                     | 1,38E-11 | CD28, CD1D, CD3D, CD3E, DOCK2, FAS, HLA-DOA, ITK, PTPRC, SIT1, TRAT1, VAV1                                                                                                                                                                                                                                                          | 12 |
| Hematopoiesis | generation                    | generation of T lymphocytes                    | 2,92E-11 | CD28, CD86, HLA-DQB1, ICOS, IL10RA, IL12RB1, IL2RG, ITK, JAK3, PSMB9, SOCS3, STAT4, TBX21, TLR4, TNFSF13B                                                                                                                                                                                                                           | 15 |
| Hematopoiesis | generation                    | generation of helper T lymphocytes             | 6,36E-07 | CD28, IL12RB1, JAK3, SOCS3, STAT4, TBX21, TNFSF13B                                                                                                                                                                                                                                                                                  | 7  |
| Hematopoiesis | generation                    | generation of Th1 cells                        | 1,02E-06 | CD28, IL12RB1, JAK3, STAT4, TBX21                                                                                                                                                                                                                                                                                                   | 5  |
| Hematopoiesis | migration                     | migration of bone marrow cells                 | 1,12E-10 | CCL4, CCL5, CD47, CXCL6, CXCL9, CXCR4, FAS, FHL2, HCK, HIF1A, ITGAL, ITGAM, ITGAX, ITGB2, LTF, LUM, MMP7, PIK3CD, PTGDR, TLR4                                                                                                                                                                                                       | 20 |
| Hematopoiesis | migration                     | migration of granulocytes                      | 7,42E-09 | CCL4, CCL5, CD47, CXCL6, CXCL9, FAS, HCK, ITGAL, ITGAM, ITGAX, ITGB2, LTF, LUM, MMP7, PIK3CD, PTGDR, TLR4                                                                                                                                                                                                                           | 17 |
| Hematopoiesis | migration                     | migration of neutrophils                       | 3,31E-08 | CCL5, CD47, CXCL6, FAS, HCK, ITGAL, ITGAM, ITGAX, ITGB2, LUM, MMP7, PIK3CD, PTGDR, TLR4                                                                                                                                                                                                                                             | 14 |
| Hematopoiesis | quantity                      | quantity of thymocytes                         | 3,70E-10 | CD86, CD244, CD247, CD3E, CTLA4, ETS1, FAS, IL2RG, IL7R, ITK, JAK3, LCK, LCP2, RUNX1, RUNX3, TOX, TRA@                                                                                                                                                                                                                              | 17 |
| Hematopoiesis | activation-induced cell death | activation-induced cell death of T lymphocytes | 1,39E-09 | CCR5, CD28, CD3E, CIITA, FAS, ITK, MAP4K1, PRF1, RAC2, STAT1                                                                                                                                                                                                                                                                        | 10 |
| Hematopoiesis | polarization                  | polarization of T lymphocytes                  | 1,71E-08 | CCL19, CD28, CTLA4, ICOS, IL12RB1, IRF4, LCK, RASSF5, STAT4, TBX21, VAV1                                                                                                                                                                                                                                                            | 11 |
| Hematopoiesis | binding                       | binding of red blood cells                     | 1,73E-07 | CD2, FCGR2A, FCGR3B, ITGAM, ITGB2, LTF                                                                                                                                                                                                                                                                                              | 6  |
| Hematopoiesis | cell movement                 | cell movement of bone marrow cells             | 4,66E-07 | CCL2, CCL4, CD47, CXCL9, ITGAL, ITGAM, ITGAX, ITGB2, PIK3CD, PTGDR, TLR4                                                                                                                                                                                                                                                            | 11 |



|                               |                 |                                          |          |                                                                                                                                                                                                                                                                                                                                                                                                                                                                                                                                                                                                                              |    |
|-------------------------------|-----------------|------------------------------------------|----------|------------------------------------------------------------------------------------------------------------------------------------------------------------------------------------------------------------------------------------------------------------------------------------------------------------------------------------------------------------------------------------------------------------------------------------------------------------------------------------------------------------------------------------------------------------------------------------------------------------------------------|----|
| Hematopoiesis                 | transmigration  | transmigration of granulocytes           | 6,48E-07 | CD47, CXCL9, ITGAL, ITGAM, ITGAX, ITGB2, PIK3CD, PTGDR, TLR4                                                                                                                                                                                                                                                                                                                                                                                                                                                                                                                                                                 | 9  |
| Hematopoiesis                 | transmigration  | transmigration of neutrophils            | 7,77E-07 | CD47, ITGAL, ITGAM, ITGAX, ITGB2, PIK3CD, PTGDR, TLR4                                                                                                                                                                                                                                                                                                                                                                                                                                                                                                                                                                        | 8  |
| Cell-mediated Immune Response | homeostasis     | T cell homeostasis                       | 5,21E-46 | AHR, APAF1, BCL11B, BCL2A1, CASP1, CBL, CCL4, CCL5, CCL19, CCR5, CD2, CD28, CD47, CD86, CD247, CD1D, CD3D, CD3E, CD3G, CD8A, CD8B, CHEK2, CIITA, CLEC10A, CORO1A, CTLA4, CXCR4, DOCK2, EOMES, ETS1, FAS, FCER1G, FCGR2A, GIMAP5, GZMA, GZMB, HLA-DOA, HLA-DQA1, HLA-DQB1, ICOS, IDO1, IGHG1, IGHM, IKZF1, IL10RA, IL12RB1, IL2RB, IL2RG, IL7R, IRF1, IRF4, IRF8, ITGAL, ITGB2, ITK, JAK3, KLRD1, LAT2, LAX1, LCK, LCP2, LEF1, MAP4K1, PIK3CD, PRDM1, PRF1, PSMB9, PTPN22, PTPRC, RAC2, RASSF5, RUNX1, RUNX2, RUNX3, SH2D1A, SH2D2A, SIT1, SOCS3, STAT1, STAT4, TBX21, TLR4, TNFRSF1B, TNFSF13B, TOX, TRA@, TRAT1, VAV1, XCL1 | 89 |
| Cell-mediated Immune Response | development     | T cell development                       | 2,65E-45 | AHR, APAF1, BCL11B, BCL2A1, CASP1, CBL, CCL4, CCL5, CCL19, CCR5, CD2, CD28, CD47, CD86, CD247, CD1D, CD3D, CD3E, CD3G, CD8A, CD8B, CHEK2, CIITA, CLEC10A, CTLA4, CXCR4, DOCK2, EOMES, ETS1, FAS, FCER1G, FCGR2A, GIMAP5, GZMA, GZMB, HLA-DOA, HLA-DQA1, HLA-DQB1, ICOS, IDO1, IGHG1, IGHM, IKZF1, IL10RA, IL12RB1, IL2RB, IL2RG, IL7R, IRF1, IRF4, IRF8, ITGAL, ITGB2, ITK, JAK3, KLRD1, LAT2, LAX1, LCK, LCP2, LEF1, MAP4K1, PIK3CD, PRDM1, PRF1, PSMB9, PTPN22, PTPRC, RAC2, RASSF5, RUNX1, RUNX2, RUNX3, SH2D1A, SH2D2A, SIT1, SOCS3, STAT1, STAT4, TBX21, TLR4, TNFRSF1B, TNFSF13B, TOX, TRA@, TRAT1, VAV1, XCL1         | 88 |
| Cell-mediated Immune Response | development     | development of thymocytes                | 4,63E-12 | CD3D, CD3E, CD3G, CXCR4, ETS1, IL2RB, IL2RG, IL7R, IRF1, LAT2, LAX1, LCP2, PTPRC, SIT1, TRA@, TRAT1                                                                                                                                                                                                                                                                                                                                                                                                                                                                                                                          | 16 |
| Cell-mediated Immune Response | development     | development of helper T lymphocytes      | 8,61E-11 | AHR, CASP1, CD28, CD86, ICOS, IL12RB1, IRF1, ITGB2, ITK, SOCS3, STAT1, STAT4, TBX21                                                                                                                                                                                                                                                                                                                                                                                                                                                                                                                                          | 13 |
| Cell-mediated Immune Response | development     | NK cell development                      | 6,40E-07 | CD2, CD1D, EOMES, FAS, FCGR2A, IKZF1, IRF1, ITGAL, JAK3, KLRD1, TBX21                                                                                                                                                                                                                                                                                                                                                                                                                                                                                                                                                        | 11 |
| Cell-mediated Immune Response | development     | arrest in development of T lymphocytes   | 1,02E-06 | CBL, CD3D, CXCR4, LCK, LCP2                                                                                                                                                                                                                                                                                                                                                                                                                                                                                                                                                                                                  | 5  |
| Cell-mediated Immune Response | development     | development of gamma-delta T lymphocytes | 1,76E-06 | CD3D, CD3G, IL2RG, JAK3                                                                                                                                                                                                                                                                                                                                                                                                                                                                                                                                                                                                      | 4  |
| Cell-mediated Immune Response | differentiation | differentiation of T lymphocytes         | 3,33E-26 | AHR, APAF1, BCL2A1, CCL19, CD2, CD28, CD86, CD1D, CD3E, CD8A, CD8B, CTLA4, ETS1, GIMAP5, HLA-DOA, HLA-DQA1, ICOS, IGHG1, IKZF1, IL12RB1, IL2RB, IL2RG, IL7R, IRF1, IRF4, IRF8, ITGAL, ITGB2, ITK, JAK3, LCK, LCP2, LEF1, PIK3CD, PRDM1, PTPN22, PTPRC, RASSF5, RUNX1, SH2D1A, SOCS3, STAT1, STAT4, TBX21, TNFSF13B, TOX, TRA@, VAV1                                                                                                                                                                                                                                                                                          | 48 |
| Cell-mediated Immune Response | differentiation | differentiation of helper T lymphocytes  | 3,76E-14 | AHR, CD28, CD86, CTLA4, ETS1, ICOS, IGHG1, IL12RB1, IL2RB, IRF1, IRF8, ITGAL, ITGB2, ITK, JAK3, PIK3CD, RUNX1, SH2D1A, STAT1, STAT4, TBX21, TNFSF13B, VAV1                                                                                                                                                                                                                                                                                                                                                                                                                                                                   | 23 |
| Cell-mediated Immune Response | differentiation | differentiation of Th2 cells             | 3,55E-12 | CD28, CD86, CTLA4, ICOS, IGHG1, IRF1, ITK, JAK3, PIK3CD, RUNX1, SH2D1A, STAT1, STAT4, TBX21, VAV1                                                                                                                                                                                                                                                                                                                                                                                                                                                                                                                            | 15 |
| Cell-mediated Immune Response | differentiation | differentiation of Th1 cells             | 1,08E-08 | CD86, CTLA4, ICOS, IL12RB1, IRF1, IRF8, ITGAL, ITGB2, JAK3, PIK3CD, STAT1, STAT4, TBX21                                                                                                                                                                                                                                                                                                                                                                                                                                                                                                                                      | 13 |
| Cell-mediated Immune Response | differentiation | differentiation of thymocytes            | 1,06E-07 | APAF1, CD2, CD28, CD86, CD3E, CD8B, IKZF1, IL2RG, LCP2, TRA@                                                                                                                                                                                                                                                                                                                                                                                                                                                                                                                                                                 | 10 |
| Cell-mediated Immune Response | cell death      | cell death of T lymphocytes              | 5,52E-23 | APAF1, BCL2A1, CASP1, CCL4, CCL5, CCL19, CCR5, CD2, CD28, CD47, CD247, CD3E, CHEK2, CIITA, CLEC10A, CTLA4, CXCR4, EOMES, FAS, GIMAP5, GZMA, GZMB, ICOS, IDO1, IGHM, IL2RG, IL7R, ITK, JAK3, KLRD1, LCK, MAP4K1, PIK3CD, PRDM1, PRF1, PTPRC, RAC2, SH2D2A, STAT1, TBX21, TNFRSF1B, XCL1                                                                                                                                                                                                                                                                                                                                       | 42 |
| Cell-mediated                 | cell            | cell death of                            | 8,80E-07 | CD2, EOMES, FAS, ITGAL, KLRD1, TBX21                                                                                                                                                                                                                                                                                                                                                                                                                                                                                                                                                                                         | 6  |

|                                   |                               |                                                |          |                                                                                                                                                                                                                                                                                                                                                                                                                                                                                                                                                                                                                                      |    |  |
|-----------------------------------|-------------------------------|------------------------------------------------|----------|--------------------------------------------------------------------------------------------------------------------------------------------------------------------------------------------------------------------------------------------------------------------------------------------------------------------------------------------------------------------------------------------------------------------------------------------------------------------------------------------------------------------------------------------------------------------------------------------------------------------------------------|----|--|
| Immune Response                   | death                         | natural killer cells                           |          |                                                                                                                                                                                                                                                                                                                                                                                                                                                                                                                                                                                                                                      |    |  |
| Cell-mediated Immune Response     | apoptosis                     | apoptosis of T lymphocytes                     | 3,12E-16 | BCL2A1, CASP1, CCL4, CCL5, CCR5, CD2, CD28, CD47, CD247, CD3E, CHEK2, CIITA, CTLA4, CXCR4, FAS, GIMAP5, GZMA, GZMB, ICOS, IL2RG, IL7R, ITK, JAK3, LCK, MAP4K1, PIK3CD, PRF1, PTPRC, RAC2, STAT1, TNFRSF1B, XCL1                                                                                                                                                                                                                                                                                                                                                                                                                      | 32 |  |
| Cell-mediated Immune Response     | migration                     | T cell migration                               | 2,66E-13 | CCL2, CCL4, CCL5, CCL19, CCL21, CCR2, CCR5, CCR6, CD28, CD69, CD86, CTLA4, CXCL9, CXCR4, DOCK2, FAS, FYB, HGF, ICOS, ITGB2, ITK, LCK, PRF1, SELPLG, SOCS3, TLR4, XCL1                                                                                                                                                                                                                                                                                                                                                                                                                                                                | 27 |  |
| Cell-mediated Immune Response     | adhesion                      | adhesion of T lymphocytes                      | 7,51E-12 | CCL4, CCL19, CCL21, CD2, CD47, CD48, CXCL9, FAS, FYB, HGF, ICOS, ITGAL, ITGB2, ITK, RASSF5, SELPLG, TLR4                                                                                                                                                                                                                                                                                                                                                                                                                                                                                                                             | 17 |  |
| Cell-mediated Immune Response     | selection                     | selection of T lymphocytes                     | 1,38E-11 | CD28, CD1D, CD3D, CD3E, DOCK2, FAS, HLA-DOA, ITK, PTPRC, SIT1, TRAT1, VAV1                                                                                                                                                                                                                                                                                                                                                                                                                                                                                                                                                           | 12 |  |
| Cell-mediated Immune Response     | generation                    | generation of T lymphocytes                    | 2,92E-11 | CD28, CD86, HLA-DQB1, ICOS, IL10RA, IL12RB1, IL2RG, ITK, JAK3, PSMB9, SOCS3, STAT4, TBX21, TLR4, TNFSF13B                                                                                                                                                                                                                                                                                                                                                                                                                                                                                                                            | 15 |  |
| Cell-mediated Immune Response     | generation                    | generation of helper T lymphocytes             | 6,36E-07 | CD28, IL12RB1, JAK3, SOCS3, STAT4, TBX21, TNFSF13B                                                                                                                                                                                                                                                                                                                                                                                                                                                                                                                                                                                   | 7  |  |
| Cell-mediated Immune Response     | generation                    | generation of Th1 cells                        | 1,02E-06 | CD28, IL12RB1, JAK3, STAT4, TBX21                                                                                                                                                                                                                                                                                                                                                                                                                                                                                                                                                                                                    | 5  |  |
| Cell-mediated Immune Response     | recruitment                   | recruitment of T lymphocytes                   | 7,48E-10 | CCL2, CCL4, CCL5, CCL19, CCL21, CCR2, CCR6, CD8A, CXCL9, CXCR4, ETS1, FCER1A                                                                                                                                                                                                                                                                                                                                                                                                                                                                                                                                                         | 12 |  |
| Cell-mediated Immune Response     | cell movement                 | cell movement of T lymphocytes                 | 8,64E-10 | CCL2, CCL4, CCL5, CCL19, CCL21, CCR2, CCR5, CD28, CD86, CTLA4, CXCL9, CXCR4, FAS, ITGB2, ITK, PRF1, SELPLG, SOCS3, TLR4, XCL1                                                                                                                                                                                                                                                                                                                                                                                                                                                                                                        | 20 |  |
| Cell-mediated Immune Response     | cell movement                 | cell movement of memory T lymphocytes          | 1,29E-07 | CCL2, CCL5, CCL19, CCL21, CD28, CXCL9, ITGB2                                                                                                                                                                                                                                                                                                                                                                                                                                                                                                                                                                                         | 7  |  |
| Cell-mediated Immune Response     | activation-induced cell death | activation-induced cell death of T lymphocytes | 1,39E-09 | CCR5, CD28, CD3E, CIITA, FAS, ITK, MAP4K1, PRF1, RAC2, STAT1                                                                                                                                                                                                                                                                                                                                                                                                                                                                                                                                                                         | 10 |  |
| Cell-mediated Immune Response     | polarization                  | polarization of T lymphocytes                  | 1,71E-08 | CCL19, CD28, CTLA4, ICOS, IL12RB1, IRF4, LCK, RASSF5, STAT4, TBX21, VAV1                                                                                                                                                                                                                                                                                                                                                                                                                                                                                                                                                             | 11 |  |
| Cell-mediated Immune Response     | infiltration                  | infiltration by T lymphocytes                  | 1,38E-07 | CCL19, CCL21, CCR2, CCR5, CD86, CTLA4, FAS, ITK, PRF1, SELPLG, XCL1                                                                                                                                                                                                                                                                                                                                                                                                                                                                                                                                                                  | 11 |  |
| Cellular Function and Maintenance | homeostasis                   | T cell homeostasis                             | 5,21E-46 | AHR, APAF1, BCL11B, BCL2A1, CASP1, CBL, CCL4, CCL5, CCL19, CCR5, CD2, CD28, CD47, CD86, CD247, CD1D, CD3D, CD3E, CD3G, CD8A, CD8B, CHEK2, CIITA, CLEC10A, CORO1A, CTLA4, CXCR4, DOCK2, EOMES, ETS1, FAS, FCER1G, FCGR2A, GIMAP5, GZMA, GZMB, HLA-DOA, HLA-DQA1, HLA-DQB1, ICOS, IDO1, IGHG1, IGHM, IKZF1, IL10RA, IL12RB1, IL2RB, IL2RG, IL7R, IRF1, IRF4, IRF8, ITGAL, ITGB2, ITK, JAK3, KLRD1, LAT2, LAX1, LCK, LCP2, LEF1, MAP4K1, PIK3CD, PRDM1, PRF1, PSMB9, PTPN22, PTPRC, RAC2, RASSF5, RUNX1, RUNX2, RUNX3, SH2D1A, SH2D2A, SIT1, SOCS3, STAT1, STAT4, TBX21, TLR4, TNFRSF1B, TNFSF13B, TOX, TRA@, TRAT1, VAV1, XCL1         | 89 |  |
| Cellular Function and Maintenance | homeostasis                   | homeostasis of leukocytes                      | 6,67E-46 | AHR, APAF1, BCL11B, BCL2A1, CASP1, CBL, CCL4, CCL5, CCL19, CCR5, CD2, CD28, CD47, CD86, CD247, CD1D, CD3D, CD3E, CD3G, CD8A, CD8B, CHEK2, CIITA, CLEC10A, CORO1A, CTLA4, CXCR4, DOCK2, EOMES, ETS1, FAS, FCER1G, FCGR2A, GIMAP5, GZMA, GZMB, HLA-DOA, HLA-DQA1, HLA-DQB1, ICOS, IDO1, IGHG1, IGHM, IKZF1, IL10RA, IL12RB1, IL2RB, IL2RG, IL7R, IRF1, IRF4, IRF8, ITGAL, ITGB2, ITK, JAK3, KLRD1, LAT2, LAX1, LCK, LCP2, LEF1, MAP4K1, PIK3CD, PRDM1, PRF1, PSMB9, PTPN22, PTPRC, RAC2, RASSF5, RUNX1, RUNX2, RUNX3, SH2D1A, SH2D2A, SIT1, SOCS3, STAT1, STAT4, TBX21, TLR4, TNFRSF1B, TNFSF13B, TOX, TRA@, TRAT1, TYROBP, VAV1, XCL1 | 90 |  |
| Cellular Function and Maintenance | development                   | T cell                                         | 2,65E-45 | AHR, APAF1, BCL11B, BCL2A1, CASP1, CBL, CCL4, CCL5, CCL19, CCR5,                                                                                                                                                                                                                                                                                                                                                                                                                                                                                                                                                                     | 88 |  |

|                                   |                 |                                          |          |                                                                                                                                                                                                                                                                                                                                                                                                                                                                                                                                                     |    |
|-----------------------------------|-----------------|------------------------------------------|----------|-----------------------------------------------------------------------------------------------------------------------------------------------------------------------------------------------------------------------------------------------------------------------------------------------------------------------------------------------------------------------------------------------------------------------------------------------------------------------------------------------------------------------------------------------------|----|
| Function and Maintenance          | development     | development                              |          | CD2, CD28, CD47, CD86, CD247, CD1D, CD3D, CD3E, CD3G, CD8A, CD8B, CHEK2, CIITA, CLEC10A, CTLA4, CXCR4, DOCK2, EOMES, ETS1, FAS, FCGR1G, FCGR2A, GIMAP5, GZMA, GZMB, HLA-DOA, HLA-DQA1, HLA-DQB1, ICOS, IDO1, IGHG1, IGHM, IKZF1, IL10RA, IL12RB1, IL2RB, IL2RG, IL7R, IRF1, IRF4, IRF8, ITGAL, ITGB2, ITK, JAK3, KLRD1, LAT2, LAX1, LCK, LCP2, LEF1, MAP4K1, PIK3CD, PRDM1, PRF1, PSMB9, PTPN22, PTPRC, RAC2, RASSF5, RUNX1, RUNX2, RUNX3, SH2D1A, SH2D2A, SIT1, SOCS3, STAT1, STAT4, TBX21, TLR4, TNFRSF1B, TNFSF13B, TOX, TRA@, TRAT1, VAV1, XCL1 |    |
| Cellular Function and Maintenance | development     | development of thymocytes                | 4,63E-12 | CD3D, CD3E, CD3G, CXCR4, ETS1, IL2RB, IL2RG, IL7R, IRF1, LAT2, LAX1, LCP2, PTPRC, SIT1, TRA@, TRAT1                                                                                                                                                                                                                                                                                                                                                                                                                                                 | 16 |
| Cellular Function and Maintenance | development     | development of helper T lymphocytes      | 8,61E-11 | AHR, CASP1, CD28, CD86, ICOS, IL12RB1, IRF1, ITGB2, ITK, SOCS3, STAT1, STAT4, TBX21                                                                                                                                                                                                                                                                                                                                                                                                                                                                 | 13 |
| Cellular Function and Maintenance | development     | NK cell development                      | 6,40E-07 | CD2, CD1D, EOMES, FAS, FCGR2A, IKZF1, IRF1, ITGAL, JAK3, KLRD1, TBX21                                                                                                                                                                                                                                                                                                                                                                                                                                                                               | 11 |
| Cellular Function and Maintenance | development     | arrest in development of T lymphocytes   | 1,02E-06 | CBL, CD3D, CXCR4, LCK, LCP2                                                                                                                                                                                                                                                                                                                                                                                                                                                                                                                         | 5  |
| Cellular Function and Maintenance | development     | development of gamma-delta T lymphocytes | 1,76E-06 | CD3D, CD3G, IL2RG, JAK3                                                                                                                                                                                                                                                                                                                                                                                                                                                                                                                             | 4  |
| Cellular Function and Maintenance | differentiation | differentiation of T lymphocytes         | 3,33E-26 | AHR, APAF1, BCL2A1, CCL19, CD2, CD28, CD86, CD1D, CD3E, CD8A, CD8B, CTLA4, ETS1, GIMAP5, HLA-DOA, HLA-DQA1, ICOS, IGHG1, IKZF1, IL12RB1, IL2RB, IL2RG, IL7R, IRF1, IRF4, IRF8, ITGAL, ITGB2, ITK, JAK3, LCK, LCP2, LEF1, PIK3CD, PRDM1, PTPN22, PTPRC, RASSF5, RUNX1, SH2D1A, SOCS3, STAT1, STAT4, TBX21, TNFSF13B, TOX, TRA@, VAV1                                                                                                                                                                                                                 | 48 |
| Cellular Function and Maintenance | differentiation | differentiation of helper T lymphocytes  | 3,76E-14 | AHR, CD28, CD86, CTLA4, ETS1, ICOS, IGHG1, IL12RB1, IL2RB, IRF1, IRF8, ITGAL, ITGB2, ITK, JAK3, PIK3CD, RUNX1, SH2D1A, STAT1, STAT4, TBX21, TNFSF13B, VAV1                                                                                                                                                                                                                                                                                                                                                                                          | 23 |
| Cellular Function and Maintenance | differentiation | differentiation of Th2 cells             | 3,55E-12 | CD28, CD86, CTLA4, ICOS, IGHG1, IRF1, ITK, JAK3, PIK3CD, RUNX1, SH2D1A, STAT1, STAT4, TBX21, VAV1                                                                                                                                                                                                                                                                                                                                                                                                                                                   | 15 |
| Cellular Function and Maintenance | differentiation | differentiation of Th1 cells             | 1,08E-08 | CD86, CTLA4, ICOS, IL12RB1, IRF1, IRF8, ITGAL, ITGB2, JAK3, PIK3CD, STAT1, STAT4, TBX21                                                                                                                                                                                                                                                                                                                                                                                                                                                             | 13 |
| Cellular Function and Maintenance | differentiation | differentiation of thymocytes            | 1,06E-07 | APAF1, CD2, CD28, CD86, CD3E, CD8B, IKZF1, IL2RG, LCP2, TRA@                                                                                                                                                                                                                                                                                                                                                                                                                                                                                        | 10 |
| Cellular Function and Maintenance | cell death      | cell death of T lymphocytes              | 5,52E-23 | APAF1, BCL2A1, CASP1, CCL4, CCL5, CCL19, CCR5, CD2, CD28, CD47, CD247, CD3E, CHEK2, CIITA, CLEC10A, CTLA4, CXCR4, EOMES, FAS, GIMAP5, GZMA, GZMB, ICOS, IDO1, IGHM, IL2RG, IL7R, ITK, JAK3, KLRD1, LCK, MAP4K1, PIK3CD, PRDM1, PRF1, PTPRC, RAC2, SH2D2A, STAT1, TBX21, TNFRSF1B, XCL1                                                                                                                                                                                                                                                              | 42 |
| Cellular Function and Maintenance | cell death      | cell death of natural killer cells       | 8,80E-07 | CD2, EOMES, FAS, ITGAL, KLRD1, TBX21                                                                                                                                                                                                                                                                                                                                                                                                                                                                                                                | 6  |
| Cellular Function and Maintenance | apoptosis       | apoptosis of T lymphocytes               | 3,12E-16 | BCL2A1, CASP1, CCL4, CCL5, CCR5, CD2, CD28, CD47, CD247, CD3E, CHEK2, CIITA, CTLA4, CXCR4, FAS, GIMAP5, GZMA, GZMB, ICOS, IL2RG, IL7R, ITK, JAK3, LCK, MAP4K1, PIK3CD, PRF1, PTPRC, RAC2, STAT1, TNFRSF1B, XCL1                                                                                                                                                                                                                                                                                                                                     | 32 |
| Cellular Function and Maintenance | function        | function of lymphocytes                  | 3,81E-16 | AHR, CD28, CD86, CTLA4, FCGR2A, ICOS, IL10RA, JAK3, KLRK1, LAX1, PIK3CD, PRF1, SH2D1A, STAT4, TLR4, TLR8 (includes EG:51311), TNFSF13B, TRA@, VAV1                                                                                                                                                                                                                                                                                                                                                                                                  | 19 |
| Cellular Function and Maintenance | function        | function of leukocytes                   | 2,06E-14 | AHR, CD28, CD86, CTLA4, FCGR2A, ICOS, IL10RA, IRF1, JAK3, KLRK1, LAX1, PIK3CD, PRF1, SH2D1A, STAT4, TLR4, TLR8 (includes EG:51311), TNFSF13B, TRA@, VAV1                                                                                                                                                                                                                                                                                                                                                                                            | 20 |
| Cellular Function and Maintenance | function        | function of cells                        | 1,56E-12 | AHR, CD28, CD47, CD86, CTLA4, FCGR2A, ICOS, IL10RA, IRF1, JAK3, KLRK1, LAX1, LTF, PIK3CD, PRF1, SH2D1A, STAT4, TBX21, TLR4, TLR8 (includes EG:51311), TNFSF13B, TRA@, VAV1                                                                                                                                                                                                                                                                                                                                                                          | 23 |
| Cellular Function and Maintenance | function        | function of T                            | 1,75E-11 | CD28, CTLA4, ICOS, IL10RA, JAK3, LAX1, PIK3CD, PRF1, SH2D1A, STAT4,                                                                                                                                                                                                                                                                                                                                                                                                                                                                                 | 14 |

|                                   |                               |                                                |          |                                                                                                                                                                  |    |
|-----------------------------------|-------------------------------|------------------------------------------------|----------|------------------------------------------------------------------------------------------------------------------------------------------------------------------|----|
| Function and Maintenance Cellular | n                             | lymphocytes                                    |          | TLR4, TLR8 (includes EG:51311), TRA@, VAV1                                                                                                                       |    |
| Function and Maintenance Cellular | function                      | function of normal cells                       | 2,24E-11 | AHR, CD28, CD47, CD86, CTLA4, FCGR2A, ICOS, IL10RA, IRF1, JAK3, KLRK1, LAX1, PIK3CD, PRF1, SH2D1A, STAT4, TLR4, TLR8 (includes EG:51311), TNFSF13B, TRA@, VAV1   | 21 |
| Function and Maintenance Cellular | phagocytosis                  | phagocytosis                                   | 4,72E-13 | C1QA, CD47, CLEC7A, CORO1A, CSF2RB, FAS, FCER1G, FCGR1A, FCGR2A, FCGR3B, HCK, ICOS, IGHG1, IRF8, ITGAM, ITGAX, ITGB2, LY75, LYN, PRKCB, RAC2, SELPLG, TLR4, VAV1 | 24 |
| Function and Maintenance Cellular | phagocytosis                  | phagocytosis of cells                          | 1,68E-11 | C1QA, CD47, CORO1A, CSF2RB, FAS, FCER1G, FCGR1A, FCGR2A, FCGR3B, HCK, IRF8, ITGAM, ITGAX, ITGB2, LY75, LYN, PRKCB, RAC2, SELPLG, TLR4, VAV1                      | 21 |
| Function and Maintenance Cellular | phagocytosis                  | phagocytosis of blood cells                    | 2,67E-10 | CD47, CORO1A, CSF2RB, FAS, FCGR1A, FCGR2A, FCGR3B, HCK, IRF8, ITGAM, ITGB2, LYN, RAC2, SELPLG, TLR4                                                              | 15 |
| Function and Maintenance Cellular | phagocytosis                  | phagocytosis of myeloid cells                  | 6,32E-10 | CD47, CORO1A, CSF2RB, FCGR2A, FCGR3B, IRF8, ITGAM, ITGB2, SELPLG, TLR4                                                                                           | 10 |
| Function and Maintenance Cellular | phagocytosis                  | phagocytosis of eukaryotic cells               | 1,94E-09 | CD47, CORO1A, CSF2RB, FAS, FCGR1A, FCGR2A, FCGR3B, HCK, IRF8, ITGAM, ITGB2, LYN, PRKCB, RAC2, SELPLG, TLR4, VAV1                                                 | 17 |
| Function and Maintenance Cellular | phagocytosis                  | phagocytosis of neutrophils                    | 4,30E-09 | CD47, CORO1A, CSF2RB, FCGR2A, FCGR3B, ITGAM, ITGB2, SELPLG, TLR4                                                                                                 | 9  |
| Function and Maintenance Cellular | phagocytosis                  | phagocytosis of leukocytes                     | 1,66E-07 | CD47, CORO1A, CSF2RB, FAS, FCGR2A, FCGR3B, IRF8, ITGAM, ITGB2, SELPLG, TLR4                                                                                      | 11 |
| Function and Maintenance Cellular | phagocytosis                  | phagocytosis of red blood cells                | 4,43E-07 | FCGR1A, FCGR2A, HCK, ITGAM, ITGB2, LYN, RAC2                                                                                                                     | 7  |
| Function and Maintenance Cellular | phagocytosis                  | phagocytosis of phagocytes                     | 6,53E-07 | CD47, CORO1A, CSF2RB, FAS, FCGR2A, FCGR3B, ITGAM, ITGB2, SELPLG, TLR4                                                                                            | 10 |
| Function and Maintenance Cellular | selection                     | selection of T lymphocytes                     | 1,38E-11 | CD28, CD1D, CD3D, CD3E, DOCK2, FAS, HLA-DOA, ITK, PTPRC, SIT1, TRAT1, VAV1                                                                                       | 12 |
| Function and Maintenance Cellular | generation                    | generation of T lymphocytes                    | 2,92E-11 | CD28, CD86, HLA-DQB1, ICOS, IL10RA, IL12RB1, IL2RG, ITK, JAK3, PSMB9, SOCS3, STAT4, TBX21, TLR4, TNFSF13B                                                        | 15 |
| Function and Maintenance Cellular | generation                    | generation of helper T lymphocytes             | 6,36E-07 | CD28, IL12RB1, JAK3, SOCS3, STAT4, TBX21, TNFSF13B                                                                                                               | 7  |
| Function and Maintenance Cellular | generation                    | generation of Th1 cells                        | 1,02E-06 | CD28, IL12RB1, JAK3, STAT4, TBX21                                                                                                                                | 5  |
| Function and Maintenance Cellular | engulfment                    | engulfment of cells                            | 8,55E-11 | C1QA, CBL, CD47, CD163, CORO1A, CSF2RB, FAS, FCER1G, FCGR1A, FCGR2A, FCGR3B, HCK, IRF8, ITGAM, ITGAX, ITGB2, LY75, LYN, PRKCB, RAC2, SELPLG, TLR4, VAV1          | 23 |
| Function and Maintenance Cellular | respiratory burst             | respiratory burst of leukocytes                | 1,15E-10 | CCL2, FCER1A, FCER1G, HCK, IGHA1, IRF8, ITGAL, ITGAM, ITGAX, ITGB2, LYN, PTPRC, TYROBP                                                                           | 13 |
| Function and Maintenance Cellular | respiratory burst             | respiratory burst of myeloid cells             | 2,09E-09 | FCER1A, FCER1G, HCK, IGHA1, ITGAL, ITGAM, ITGAX, ITGB2, LYN, PTPRC, TYROBP                                                                                       | 11 |
| Function and Maintenance Cellular | respiratory burst             | respiratory burst of phagocytes                | 2,09E-09 | FCER1A, FCER1G, HCK, IGHA1, IRF8, ITGAL, ITGAM, ITGAX, ITGB2, LYN, TYROBP                                                                                        | 11 |
| Function and Maintenance Cellular | respiratory burst             | respiratory burst of neutrophils               | 7,59E-09 | FCER1A, FCER1G, HCK, IGHA1, ITGAL, ITGAM, ITGAX, ITGB2, LYN, TYROBP                                                                                              | 10 |
| Function and Maintenance Cellular | activation-induced cell death | activation-induced cell death of T lymphocytes | 1,39E-09 | CCR5, CD28, CD3E, CIITA, FAS, ITK, MAP4K1, PRF1, RAC2, STAT1                                                                                                     | 10 |
| Cellular                          | polarization                  | polarization of                                | 1,71E-08 | CCL19, CD28, CTLA4, ICOS, IL12RB1, IRF4, LCK, RASSF5, STAT4, TBX21,                                                                                              | 11 |

|                                                                                                                                         |                                                       |                                                                                                                                      |          |                                                                                                                                                                                                                                                                                                                                                                                                                                                                                                                                                                                                                                                                                                                                  |                                                                                                                                                                                                                 |                   |
|-----------------------------------------------------------------------------------------------------------------------------------------|-------------------------------------------------------|--------------------------------------------------------------------------------------------------------------------------------------|----------|----------------------------------------------------------------------------------------------------------------------------------------------------------------------------------------------------------------------------------------------------------------------------------------------------------------------------------------------------------------------------------------------------------------------------------------------------------------------------------------------------------------------------------------------------------------------------------------------------------------------------------------------------------------------------------------------------------------------------------|-----------------------------------------------------------------------------------------------------------------------------------------------------------------------------------------------------------------|-------------------|
| Function and Maintenance Cellular Function and Maintenance Cellular Function and Maintenance Cellular Function and Maintenance Cellular | ation<br>presen<br>ce<br>presen<br>ce<br>presen<br>ce | T lymphocytes<br>presence of normal cells<br>presence of blood cells<br>presence of leukocytes<br>presence of mononuclear leukocytes |          | VAV1<br>2,50E-07<br>2,50E-07<br>6,36E-07<br>8,80E-07                                                                                                                                                                                                                                                                                                                                                                                                                                                                                                                                                                                                                                                                             | CCL19, CCL21, CCR6, CXCR4, FCGR2A, HCK, HGF, ITGAM, JAK3, SOCS3<br>CCL19, CCL21, CCR6, CXCR4, FCGR2A, HCK, ITGAM, JAK3<br>CCL19, CCL21, CCR6, CXCR4, HCK, ITGAM, JAK3<br>CCL19, CCL21, CCR6, CXCR4, ITGAM, JAK3 | 10<br>8<br>7<br>6 |
| Cell-To-Cell Signaling and Interaction                                                                                                  | activati<br>on                                        | activation of leukocytes                                                                                                             | 1,47E-45 | BTK, C1QA, C3AR1, CCL2, CCL4, CCL5, CCR2, CD2, CD28, CD47, CD48, CD86, CD163, CD244, CD247, CD1B, CD1C, CD1D, CD1E, CD300A, CD3E, CD8A, CFH, CLEC4C, CLEC7A, CORO1A, CSF1R, CTLA4, CXCL6, CXCL9, DOCK2, FAS, FCER1G, FCGR1A, FCGR2A, FYB, GIMAP5, GZMA, GZMB, HCK, HLA-DMB, HLA-DOA, HLA-DQA1, HLA-DQB1, HLA-DRA, ICOS, IGHG1, IGHM, IL12RB1, IL2RB, ITGAL, ITGAM, ITGB2, ITGB6, ITK, JAK3, KLRD1, KLRK1, LAT2, LAX1, LCK, LCP2, LTF, LY96, LYN, PIK3CD, POU2AF1, PRF1, PSMB9, PTGES, PTPRC, SIRPG, SIT1, SLAMF6, STAT1, STAT4, TBX21, TLR4, TLR7, TLR8 (includes EG:51311), TNC, TNFRSF17, TNFRSF1B, TNFSF13B, TYROBP, VAV1                                                                                                     | 86                                                                                                                                                                                                              |                   |
| Cell-To-Cell Signaling and Interaction                                                                                                  | activati<br>on                                        | activation of cells                                                                                                                  | 6,05E-44 | ACSL5, BCL2A1, BTK, C1QA, C3AR1, CASP1, CCL2, CCL4, CCL5, CCL21, CCR2, CCR6, CD2, CD28, CD47, CD48, CD86, CD163, CD244, CD247, CD1B, CD1C, CD1D, CD1E, CD300A, CD3E, CD8A, CFH, CLEC4C, CLEC7A, CORO1A, CSF1R, CTLA4, CX3CR1, CXCL6, CXCL9, CXCR4, CYBB, DOCK2, FAS, FCER1G, FCGR1A, FCGR2A, FYB, GIMAP5, GNA13, GZMA, GZMB, HCK, HGF, HLA-DMB, HLA-DOA, HLA-DQA1, HLA-DQB1, HLA-DRA, ICOS, IGHG1, IGHM, IGK@, IGL@, IL12RB1, IL2RB, IL2RG, ITGAL, ITGAM, ITGAX, ITGB2, ITGB6, ITK, JAK3, KLRD1, KLRK1, LAT2, LAX1, LCK, LCP2, LTF, LY96, LYN, PIK3CD, POU2AF1, PRF1, PSMB9, PTGES, PTPRC, SIRPG, SIT1, SLAMF6, STAT1, STAT4, TBX21, TLR4, TLR7, TLR8 (includes EG:51311), TNC, TNFRSF17, TNFRSF1B, TNFSF13B, TRA@, TYROBP, VAV1 | 101                                                                                                                                                                                                             |                   |
| Cell-To-Cell Signaling and Interaction                                                                                                  | activati<br>on                                        | activation of blood cells                                                                                                            | 6,41E-44 | BTK, C1QA, C3AR1, CCL2, CCL4, CCL5, CCR2, CD2, CD28, CD47, CD48, CD86, CD163, CD244, CD247, CD1B, CD1C, CD1D, CD1E, CD300A, CD3E, CD8A, CFH, CLEC4C, CLEC7A, CORO1A, CSF1R, CTLA4, CXCL6, CXCL9, CXCR4, CYBB, DOCK2, FAS, FCER1G, FCGR1A, FCGR2A, FYB, GIMAP5, GNA13, GZMA, GZMB, HCK, HLA-DMB, HLA-DOA, HLA-DQA1, HLA-DQB1, HLA-DRA, ICOS, IGHG1, IGHM, IL12RB1, IL2RB, ITGAL, ITGAM, ITGB2, ITGB6, ITK, JAK3, KLRD1, KLRK1, LAT2, LAX1, LCK, LCP2, LTF, LY96, LYN, PIK3CD, POU2AF1, PRF1, PSMB9, PTGES, PTPRC, SIRPG, SIT1, SLAMF6, STAT1, STAT4, TBX21, TLR4, TLR7, TLR8 (includes EG:51311), TNC, TNFRSF17, TNFRSF1B, TNFSF13B, TYROBP, VAV1                                                                                 | 87                                                                                                                                                                                                              |                   |
| Cell-To-Cell Signaling and Interaction                                                                                                  | activati<br>on                                        | activation of normal cells                                                                                                           | 5,05E-43 | BCL2A1, BTK, C1QA, C3AR1, CASP1, CCL2, CCL4, CCL5, CCL21, CCR2, CCR6, CD2, CD28, CD47, CD48, CD86, CD163, CD244, CD247, CD1B, CD1C, CD1D, CD1E, CD300A, CD3E, CD8A, CFH, CLEC4C, CLEC7A, CORO1A, CSF1R, CTLA4, CX3CR1, CXCL6, CXCL9, CXCR4, CYBB, DOCK2, FAS, FCER1G, FCGR1A, FCGR2A, FYB, GIMAP5, GNA13, GZMA, GZMB, HCK, HGF, HLA-DMB, HLA-DOA, HLA-DQA1, HLA-DQB1, HLA-DRA, ICOS, IGHG1, IGHM, IL12RB1, IL2RB, ITGAL, ITGAM, ITGB2, ITGB6, ITK, JAK3, KLRD1, KLRK1, LAT2, LAX1, LCK, LCP2, LTF, LY96, LYN, PIK3CD, POU2AF1, PRF1, PSMB9, PTGES, PTPRC, SIRPG, SIT1, SLAMF6, STAT1, STAT4, TBX21, TLR4, TLR7, TLR8 (includes EG:51311), TNC, TNFRSF17, TNFRSF1B, TNFSF13B, TYROBP, VAV1                                        | 95                                                                                                                                                                                                              |                   |
| Cell-To-Cell Signaling and Interaction                                                                                                  | activati<br>on                                        | activation of eukaryotic cells                                                                                                       | 4,71E-42 | ACSL5, BCL2A1, BTK, C1QA, C3AR1, CASP1, CCL2, CCL4, CCL5, CCL21, CCR2, CCR6, CD2, CD28, CD47, CD48, CD86, CD163, CD244, CD247, CD1B, CD1C, CD1D, CD1E, CD300A, CD3E, CD8A, CFH, CLEC4C, CLEC7A, CORO1A, CSF1R, CTLA4, CX3CR1, CXCL6, CXCL9, CXCR4, CYBB, DOCK2, FAS, FCER1G, FCGR1A, FCGR2A, FYB, GIMAP5, GNA13, GZMA, GZMB, HCK, HGF, HLA-DMB, HLA-DOA, HLA-DQA1, HLA-DQB1, HLA-DRA, ICOS, IGHG1, IGHM, IL12RB1, IL2RB, ITGAL, ITGAM, ITGB2, ITGB6, ITK, JAK3, KLRD1, KLRK1, LAT2, LAX1, LCK, LCP2, LTF, LY96, LYN, PIK3CD, POU2AF1, PRF1, PSMB9, PTGES, PTPRC, SIRPG, SIT1, SLAMF6, STAT1, STAT4,                                                                                                                              | 97                                                                                                                                                                                                              |                   |

|                                        |            |                                        |          |                                                                                                                                                                                                                                                                                                                                                                                                                                                                                                  |    |
|----------------------------------------|------------|----------------------------------------|----------|--------------------------------------------------------------------------------------------------------------------------------------------------------------------------------------------------------------------------------------------------------------------------------------------------------------------------------------------------------------------------------------------------------------------------------------------------------------------------------------------------|----|
| Cell-To-Cell Signaling and Interaction | activation | activation of mononuclear leukocytes   | 1,22E-39 | TBX21, TLR4, TLR7, TLR8 (includes EG:51311), TNC, TNFRSF17, TNFRSF1B, TNFSF13B, TRA@, TYROBP, VAV1                                                                                                                                                                                                                                                                                                                                                                                               | 69 |
| Cell-To-Cell Signaling and Interaction | activation | activation of lymphocytes              | 3,94E-39 | BTK, C1QA, C3AR1, CCL2, CCL4, CCL5, CCR2, CD2, CD28, CD47, CD48, CD86, CD163, CD244, CD247, CD1B, CD1C, CD1D, CD1E, CD3E, CD8A, CLEC4C, CLEC7A, CORO1A, CTLA4, DOCK2, FAS, FCER1G, FCGR2A, GIMAP5, GZMA, GZMB, HLA-DRA, ICOS, IGHG1, IGHM, IL12RB1, IL2RB, ITGAL, ITGB2, ITK, JAK3, KLRD1, KLRK1, LAT2, LAX1, LCK, LTF, LY96, LYN, PIK3CD, POU2AF1, PRF1, PTPRC, SIRPG, SIT1, SLAMF6, STAT1, STAT4, TBX21, TLR4, TLR7, TLR8 (includes EG:51311), TNC, TNFRSF17, TNFRSF1B, TNFSF13B, TYROBP, VAV1 | 67 |
| Cell-To-Cell Signaling and Interaction | activation | activation of T lymphocytes            | 3,31E-31 | C3AR1, CCL2, CCL4, CCL5, CCR2, CD2, CD28, CD47, CD48, CD86, CD244, CD247, CD1D, CD3E, CD8A, CLEC4C, CLEC7A, CORO1A, CTLA4, DOCK2, FAS, FCER1G, GIMAP5, GZMA, GZMB, HLA-DRA, ICOS, IGHG1, IL2RB, ITGAL, ITGB2, ITK, JAK3, KLRD1, LAT2, LAX1, LCK, PIK3CD, PRF1, PTPRC, SIRPG, SIT1, STAT1, STAT4, TBX21, TLR4, TLR7, TLR8 (includes EG:51311), TNC, TNFRSF1B, TYROBP, VAV1                                                                                                                        | 52 |
| Cell-To-Cell Signaling and Interaction | activation | activation of antigen presenting cells | 1,93E-12 | CCL2, CCL4, CCL5, CD86, CD1D, CSF1R, FAS, FCER1G, FCGR1A, FCGR2A, HCK, HLA-DMB, HLA-DOA, HLA-DQA1, HLA-DQB1, IGHM, ITGB6, LTF, PSMB9, PTGES, STAT1, STAT4, TLR4, TLR7, TNFRSF1B                                                                                                                                                                                                                                                                                                                  | 25 |
| Cell-To-Cell Signaling and Interaction | activation | activation of B lymphocytes            | 7,97E-11 | BTK, C1QA, CD86, CD8A, FAS, IGHG1, IGHM, LAT2, LAX1, LYN, PIK3CD, POU2AF1, PTPRC, TLR4, TNFRSF17, TNFSF13B, VAV1                                                                                                                                                                                                                                                                                                                                                                                 | 17 |
| Cell-To-Cell Signaling and Interaction | activation | activation of natural killer cells     | 3,15E-10 | CCL5, CD2, CD28, CD244, CD1D, FCGR2A, IL12RB1, IL2RB, ITGAL, ITGB2, KLRD1, KLRK1, LTF, PRF1, SLAMF6, STAT4, TYROBP                                                                                                                                                                                                                                                                                                                                                                               | 17 |
| Cell-To-Cell Signaling and Interaction | activation | activation of mast cells               | 1,71E-08 | CCL5, CCR2, CD48, CD300A, FCER1G, FCGR2A, FYB, ITGAM, LCP2, TLR7, TLR8 (includes EG:51311)                                                                                                                                                                                                                                                                                                                                                                                                       | 11 |
| Cell-To-Cell Signaling and Interaction | activation | activation of cytotoxic T cells        | 8,02E-07 | CCR2, CD28, CD86, CD247, CTLA4, FAS, GZMA, GZMB, PRF1                                                                                                                                                                                                                                                                                                                                                                                                                                            | 9  |
| Cell-To-Cell Signaling and Interaction | binding    | binding of leukocytes                  | 2,71E-25 | CCL2, CCL4, CCL5, CCL19, CCL21, CCR5, CD2, CD47, CD48, CD69, CD86, CD3E, CLEC10A, CTLA4, CXCL9, FAS, FCGR1A, FCGR2A, FCGR3B, FYB, HCK, HGF, ICOS, ITGAL, ITGAM, ITGAX, ITGB2, ITK, KLRK1, LCK, LCP2, LTF, LYN, PTPRC, SELPLG, STK4, TLR4, TNC                                                                                                                                                                                                                                                    | 38 |
| Cell-To-Cell Signaling and Interaction | binding    | binding of blood cells                 | 1,14E-23 | CCL2, CCL4, CCL5, CCL19, CCL21, CCR5, CD2, CD47, CD48, CD69, CD84, CD86, CD3E, CLEC10A, CTLA4, CXCL9, FAS, FCGR1A, FCGR2A, FCGR3B, FYB, HCK, HGF, ICOS, IRF8, ITGAL, ITGAM, ITGAX, ITGB2, ITK, KLRK1, LCK, LCP2, LTF, LYN, PTPRC, SELPLG, STK4, TLR4, TNC                                                                                                                                                                                                                                        | 40 |
| Cell-To-Cell Signaling and Interaction | binding    | binding of mononuclear leukocytes      | 7,65E-22 | CCL2, CCL4, CCL5, CCL19, CCL21, CCR5, CD2, CD47, CD69, CD86, CD3E, CLEC10A, CTLA4, CXCL9, FAS, FYB, HGF, ICOS, ITGAL, ITGAM, ITGB2, ITK, KLRK1, LCK, LCP2, SELPLG, STK4, TNC                                                                                                                                                                                                                                                                                                                     | 28 |
| Cell-To-Cell Signaling and Interaction | binding    | binding of lymphocytes                 | 2,04E-20 | CCL4, CCL5, CCL19, CCL21, CD2, CD47, CD69, CD86, CD3E, CLEC10A, CTLA4, CXCL9, FAS, FYB, HGF, ICOS, ITGAL, ITGB2, ITK, KLRK1, LCK, LCP2, SELPLG, STK4, TNC                                                                                                                                                                                                                                                                                                                                        | 25 |
| Cell-To-Cell Signaling and Interaction | binding    | binding of T lymphocytes               | 9,76E-20 | CCL4, CCL5, CCL21, CD2, CD47, CD69, CD86, CLEC10A, CTLA4, CXCL9, FAS, FYB, ICOS, ITGAL, ITGB2, ITK, KLRK1, LCK, LCP2, SELPLG, STK4, TNC                                                                                                                                                                                                                                                                                                                                                          | 22 |
| Cell-To-Cell Signaling and Interaction | binding    | binding of cells                       | 1,53E-17 | CBL, CCL2, CCL4, CCL5, CCL19, CCL21, CCR5, CD2, CD28, CD47, CD48, CD69, CD84, CD86, CD3E, CLEC10A, CLEC7A, CTLA4, CXCL9, CXCR4, FAS, FCGR1A, FCGR2A, FCGR3B, FHL2, FYB, GZMB, HCK, HGF, ICOS, IGKC, IL2RG, IRF8, ITGAL, ITGAM, ITGAX, ITGB2, ITK, KLRK1, LCK, LCP2, LTF, LY96, LYN, PLD1, PTPRC, SELPLG, STK4, TLR4, TNC, TNFRSF17                                                                                                                                                               | 51 |
| Cell-To-Cell Signaling and Interaction | binding    | binding of eukaryotic cells            | 6,45E-16 | CBL, CCL2, CCL4, CCL5, CCL19, CCL21, CCR5, CD2, CD47, CD48, CD69, CD84, CD86, CD3E, CLEC10A, CLEC7A, CTLA4, CXCL9, CXCR4, FAS, FCGR1A, FCGR2A, FCGR3B, FHL2, FYB, HCK, HGF, ICOS, IGKC, IL2RG,                                                                                                                                                                                                                                                                                                   | 47 |

|                                        |             |                                    |          |                                                                                                                                                                                                                                                                                                                                      |    |
|----------------------------------------|-------------|------------------------------------|----------|--------------------------------------------------------------------------------------------------------------------------------------------------------------------------------------------------------------------------------------------------------------------------------------------------------------------------------------|----|
|                                        |             |                                    |          | IRF8, ITGAL, ITGAM, ITGAX, ITGB2, ITK, KLRK1, LCK, LCP2, LTF, LYN, PLD1, PTPRC, SELPLG, STK4, TLR4, TNC                                                                                                                                                                                                                              |    |
| Cell-To-Cell Signaling and Interaction | binding     | binding of cell lines              | 1,08E-09 | CBL, CCR5, CD2, CD47, CD48, CLEC7A, CXCL9, CXCR4, FAS, FCGR2A, FHL2, FYB, HGF, IGKC, IL2RG, ITGAL, ITGAM, ITGAX, ITGB2, KLRK1, LCK, LTF, LYN, PLD1, SELPLG, STK4, TLR4, TNC                                                                                                                                                          | 28 |
| Cell-To-Cell Signaling and Interaction | binding     | binding of leukemia cell lines     | 1,41E-09 | CCR5, CD47, CXCR4, FAS, FYB, ITGAL, ITGAM, ITGB2, KLRK1, LCK, PLD1, SELPLG, TNC                                                                                                                                                                                                                                                      | 13 |
| Cell-To-Cell Signaling and Interaction | binding     | binding of phagocytes              | 2,76E-09 | CD2, CD69, CLEC10A, FCGR1A, FCGR2A, FCGR3B, HCK, ITGAL, ITGAM, ITGB2, LYN, PTPRC, SELPLG, TLR4                                                                                                                                                                                                                                       | 14 |
| Cell-To-Cell Signaling and Interaction | binding     | binding of tumor cell lines        | 7,04E-09 | CBL, CCR5, CD47, CLEC7A, CXCL9, CXCR4, FAS, FCGR2A, FYB, HGF, ITGAL, ITGAM, ITGB2, KLRK1, LCK, LTF, PLD1, SELPLG, TLR4, TNC                                                                                                                                                                                                          | 20 |
| Cell-To-Cell Signaling and Interaction | binding     | binding of red blood cells         | 1,73E-07 | CD2, FCGR2A, FCGR3B, ITGAM, ITGB2, LTF                                                                                                                                                                                                                                                                                               | 6  |
| Cell-To-Cell Signaling and Interaction | binding     | binding of lymphatic system cells  | 5,47E-07 | CCL5, CD47, FCGR2A, FCGR3B, HCK, ITGAM, ITGB2, LTF, LYN, SELPLG, TLR4                                                                                                                                                                                                                                                                | 11 |
| Cell-To-Cell Signaling and Interaction | binding     | binding of leukocyte cell lines    | 6,48E-07 | CD2, CD47, FYB, IGKC, ITGAL, ITGB2, LYN, STK4, TNC                                                                                                                                                                                                                                                                                   | 9  |
| Cell-To-Cell Signaling and Interaction | binding     | binding of granulocytes            | 6,53E-07 | CCL5, FCGR2A, FCGR3B, HCK, ITGAM, ITGB2, LTF, LYN, SELPLG, TLR4                                                                                                                                                                                                                                                                      | 10 |
| Cell-To-Cell Signaling and Interaction | interaction | interaction of T lymphocytes       | 2,57E-19 | CCL4, CCL5, CCL21, CCR5, CD2, CD28, CD47, CD69, CD86, CLEC10A, CTLA4, CXCL9, FAS, FYB, ICOS, ITGAL, ITGB2, ITK, KLRK1, LCK, LCP2, SELPLG, STK4, TNC                                                                                                                                                                                  | 24 |
| Cell-To-Cell Signaling and Interaction | interaction | interaction of cells               | 4,40E-17 | CCL4, CCL5, CCL21, CCR5, CD2, CD28, CD47, CD69, CD86, CLEC10A, CTLA4, CXCL9, FAS, FYB, ICOS, ITGAL, ITGB2, ITK, KLRK1, LCK, LCP2, PCDH10, SELPLG, STK4, TNC                                                                                                                                                                          | 25 |
| Cell-To-Cell Signaling and Interaction | response    | response of leukocytes             | 4,02E-17 | CCL5, CCL19, CCL21, CCR2, CCR5, CD28, CD86, CD1D, CD3E, CLEC7A, CSF2RB, CTLA4, CXCL9, DAPP1, GZMB, ICOS, IL10RA, IL12RB1, ITGAM, ITK, LAX1, PSMB10, SELPLG, STAT4, TBX21, TLR7                                                                                                                                                       | 26 |
| Cell-To-Cell Signaling and Interaction | response    | response of normal cells           | 2,69E-16 | CCL5, CCL19, CCL21, CCR2, CCR5, CD28, CD86, CD1D, CD3E, CLEC7A, CSF2RB, CTLA4, CXCL9, DAPP1, FAS, GZMB, ICOS, IL10RA, IL12RB1, ITGAM, ITK, LAX1, PSMB10, RBL1, SELPLG, STAT4, TBX21, TLR7                                                                                                                                            | 28 |
| Cell-To-Cell Signaling and Interaction | response    | response of eukaryotic cells       | 5,55E-16 | CCL5, CCL19, CCL21, CCR2, CCR5, CD28, CD86, CD1D, CD3E, CLEC7A, CSF2RB, CTLA4, CXCL9, DAPP1, FAS, GZMB, ICOS, IL10RA, IL12RB1, ITGAM, ITK, LAX1, LY96, PSMB10, RBL1, SELPLG, STAT4, TBX21, TLR7                                                                                                                                      | 29 |
| Cell-To-Cell Signaling and Interaction | response    | response of cells                  | 7,52E-16 | BTK, CCL5, CCL19, CCL21, CCR2, CCR5, CCR6, CD28, CD86, CD1D, CD3E, CLEC2D (includes EG:29121), CLEC7A, CSF2RB, CTLA4, CX3CR1, CXCL9, DAPP1, FAS, GZMB, ICOS, IL10RA, IL12RB1, ITGAM, ITK, KLRC2, LAX1, LY96, MND4, NCF2, PRF1, PSMB10, RBL1, SELPLG, SOCS3, STAT1, STAT4, TBX21, TLR4, TLR7, TLR8 (includes EG:51311), TRAT1, TYROBP | 44 |
| Cell-To-Cell Signaling and Interaction | response    | response of mononuclear leukocytes | 6,46E-15 | CCL19, CCL21, CCR2, CCR5, CD28, CD86, CD1D, CD3E, CLEC7A, CTLA4, CXCL9, DAPP1, GZMB, ICOS, IL10RA, IL12RB1, ITK, LAX1, PSMB10, SELPLG, STAT4, TBX21                                                                                                                                                                                  | 22 |
| Cell-To-Cell Signaling and Interaction | response    | response of lymphocytes            | 2,46E-12 | CCL19, CCL21, CD28, CD86, CD1D, CD3E, CTLA4, CXCL9, DAPP1, GZMB, ICOS, IL10RA, IL12RB1, ITK, LAX1, PSMB10, SELPLG, STAT4, TBX21                                                                                                                                                                                                      | 19 |
| Cell-To-Cell Signaling and Interaction | response    | T cell response                    | 2,11E-11 | CCL19, CCL21, CD28, CD86, CD1D, CD3E, CTLA4, CXCL9, ICOS, IL10RA, IL12RB1, ITK, LAX1, PSMB10, SELPLG, STAT4, TBX21                                                                                                                                                                                                                   | 17 |
| Cell-To-Cell Signaling and Interaction | adhesion    | adhesion of blood cells            | 4,66E-17 | BTK, C1QA, CCL2, CCL4, CCL5, CCL19, CCL21, CD2, CD28, CD47, CD48, CORO1A, CXCL9, FAS, FCER1G, FCGR2A, FYB, GZMB, HCK, HGF, ICOS, IGHM, ITGAL, ITGAM, ITGAX, ITGB2, ITK, LCP1, LYN, PIK3CD, PTPRC, RAC2, RASSF5, RGS1, SELPLG, TLR4, VAV1                                                                                             | 37 |
| Cell-To-Cell Signaling and Interaction | adhesion    | adhesion of leukocytes             | 5,56E-17 | BTK, C1QA, CCL2, CCL4, CCL5, CCL19, CCL21, CD2, CD28, CD47, CD48, CORO1A, CXCL9, FAS, FCGR2A, FYB, HCK, HGF, ICOS, ITGAL, ITGAM, ITGAX, ITGB2, ITK, LCP1, LYN, PIK3CD, PTPRC, RAC2, RASSF5, RGS1, SELPLG, TLR4, VAV1                                                                                                                 | 34 |
| Cell-To-Cell Signaling and Interaction | adhesion    | adhesion of cells                  | 8,88E-17 | AMICA1, BTK, C1ORF38, C1QA, CBL, CCL2, CCL4, CCL5, CCL19, CCL21, CCR2, CCR5, CD2, CD28, CD47, CD48, CD84, CD96, CD8A, CLEC7A,                                                                                                                                                                                                        | 66 |

|                                        |              |                                         |          |                                                                                                                                                                                                                                                                                                                             |    |
|----------------------------------------|--------------|-----------------------------------------|----------|-----------------------------------------------------------------------------------------------------------------------------------------------------------------------------------------------------------------------------------------------------------------------------------------------------------------------------|----|
| Interaction                            |              |                                         |          | CORO1A, CX3CR1, CXCL9, CXCR4, CYTIP, EMB, ETS1, FAS, FCER1G, FCGR2A, FYB, GZMB, HCK, HGF, HIF1A, ICOS, IGHA1, IGHM, ITGAL, ITGAM, ITGAX, ITGB2, ITGB6, ITK, LCK, LCP1, LTF, LYN, MAP3K1, MYO1F, PARVG, PCDH10, PIK3CD, PLD1, PTPRC, RAC2, RASSF5, RGS1, SELPLG, ST8SIA4, STAT1, STK4, TLR4, TNC, VAV1, VCAN                 |    |
| Cell-To-Cell Signaling and Interaction | adhesion     | adhesion of normal cells                | 1,07E-16 | AMICA1, BTK, C1QA, CCL2, CCL4, CCL5, CCL19, CCL21, CD2, CD28, CD47, CD48, CD8A, CORO1A, CXCL9, FAS, FCER1G, FCGR2A, FYB, GZMB, HCK, HGF, HIF1A, ICOS, IGHM, ITGAL, ITGAM, ITGAX, ITGB2, ITK, LCP1, LYN, MAP3K1, PIK3CD, PTPRC, RAC2, RASSF5, RGS1, SELPLG, TLR4, TNC, VAV1                                                  | 42 |
| Cell-To-Cell Signaling and Interaction | adhesion     | adhesion of mononuclear leukocytes      | 1,35E-16 | BTK, CCL2, CCL4, CCL5, CCL19, CCL21, CD2, CD28, CD47, CD48, CXCL9, FAS, FYB, HGF, ICOS, ITGAL, ITGAM, ITGAX, ITGB2, ITK, LCP1, RASSF5, RGS1, SELPLG, TLR4, VAV1                                                                                                                                                             | 26 |
| Cell-To-Cell Signaling and Interaction | adhesion     | adhesion of eukaryotic cells            | 1,34E-15 | AMICA1, BTK, C1QA, CBL, CCL2, CCL4, CCL5, CCL19, CCL21, CD2, CD28, CD47, CD48, CD8A, CORO1A, CXCL9, CXCR4, CYTIP, ETS1, FAS, FCER1G, FCGR2A, FYB, GZMB, HCK, HGF, HIF1A, ICOS, IGHM, ITGAL, ITGAM, ITGAX, ITGB2, ITK, LCP1, LTF, LYN, MAP3K1, PARVG, PIK3CD, PLD1, PTPRC, RAC2, RASSF5, RGS1, SELPLG, TLR4, TNC, VAV1, VCAN | 50 |
| Cell-To-Cell Signaling and Interaction | adhesion     | adhesion of lymphocytes                 | 5,88E-14 | BTK, CCL2, CCL4, CCL19, CCL21, CD2, CD28, CD47, CD48, CXCL9, FAS, FYB, HGF, ICOS, ITGAL, ITGB2, ITK, RASSF5, RGS1, SELPLG, TLR4                                                                                                                                                                                             | 21 |
| Cell-To-Cell Signaling and Interaction | adhesion     | adhesion of T lymphocytes               | 7,51E-12 | CCL4, CCL19, CCL21, CD2, CD47, CD48, CXCL9, FAS, FYB, HGF, ICOS, ITGAL, ITGB2, ITK, RASSF5, SELPLG, TLR4                                                                                                                                                                                                                    | 17 |
| Cell-To-Cell Signaling and Interaction | adhesion     | adhesion of neutrophils                 | 4,19E-08 | CORO1A, ITGAL, ITGAM, ITGAX, ITGB2, LCP1, LYN, PIK3CD, SELPLG, TLR4, VAV1                                                                                                                                                                                                                                                   | 11 |
| Cell-To-Cell Signaling and Interaction | adhesion     | adhesion of granulocytes                | 3,07E-07 | CORO1A, HCK, ITGAL, ITGAM, ITGAX, ITGB2, LCP1, LYN, PIK3CD, SELPLG, TLR4, VAV1                                                                                                                                                                                                                                              | 12 |
| Cell-To-Cell Signaling and Interaction | recruitment  | recruitment of cells                    | 3,65E-14 | AHR, C3AR1, CCL2, CCL4, CCL5, CCL19, CCL21, CCR2, CCR5, CCR6, CD28, CD8A, CX3CR1, CXCL9, CXCR4, ETS1, FCER1A, HGF, HIF1A, IGHG1, ITGAM, ITGB2, LYN, LYZ, PIK3CD, SELPLG, TLR4, TLR7, TNFRSF1B                                                                                                                               | 29 |
| Cell-To-Cell Signaling and Interaction | recruitment  | recruitment of normal cells             | 1,19E-13 | AHR, C3AR1, CCL2, CCL4, CCL5, CCL19, CCL21, CCR2, CCR5, CCR6, CD28, CD8A, CX3CR1, CXCL9, CXCR4, ETS1, FCER1A, HGF, HIF1A, IGHG1, ITGAM, ITGB2, LYN, LYZ, PIK3CD, SELPLG, TLR4, TLR7                                                                                                                                         | 28 |
| Cell-To-Cell Signaling and Interaction | recruitment  | recruitment of leukocytes               | 2,05E-13 | AHR, C3AR1, CCL2, CCL4, CCL5, CCL19, CCL21, CCR2, CCR5, CCR6, CD28, CD8A, CX3CR1, CXCL9, CXCR4, ETS1, FCER1A, HIF1A, IGHG1, ITGAM, ITGB2, LYZ, PIK3CD, SELPLG, TLR4, TLR7                                                                                                                                                   | 26 |
| Cell-To-Cell Signaling and Interaction | recruitment  | recruitment of T lymphocytes            | 7,48E-10 | CCL2, CCL4, CCL5, CCL19, CCL21, CCR2, CCR6, CD8A, CXCL9, CXCR4, ETS1, FCER1A                                                                                                                                                                                                                                                | 12 |
| Cell-To-Cell Signaling and Interaction | recruitment  | recruitment of phagocytes               | 1,94E-09 | AHR, C3AR1, CCL2, CCL4, CCL5, CCL19, CCR2, CCR5, CD28, CD8A, CX3CR1, ETS1, ITGAM, ITGB2, LYZ, PIK3CD, TLR4                                                                                                                                                                                                                  | 17 |
| Cell-To-Cell Signaling and Interaction | recruitment  | recruitment of lymphocytes              | 3,35E-09 | CCL2, CCL4, CCL5, CCL19, CCL21, CCR2, CCR6, CD8A, CX3CR1, CXCL9, CXCR4, ETS1, FCER1A                                                                                                                                                                                                                                        | 13 |
| Cell-To-Cell Signaling and Interaction | recruitment  | recruitment of antigen presenting cells | 1,07E-08 | C3AR1, CCL2, CCL4, CCL5, CCL19, CCR2, CCR5, CD8A, CX3CR1, ETS1, ITGB2, TLR4                                                                                                                                                                                                                                                 | 12 |
| Cell-To-Cell Signaling and Interaction | recruitment  | recruitment of granulocytes             | 1,10E-08 | AHR, C3AR1, CCL2, CCL4, CCL5, CCL19, CCR2, CD28, CD8A, CX3CR1, CXCL9, IGHG1, ITGAM, LYZ, PIK3CD, TLR4                                                                                                                                                                                                                       | 16 |
| Cell-To-Cell Signaling and Interaction | recruitment  | recruitment of neutrophils              | 2,45E-08 | AHR, C3AR1, CCL2, CCL4, CCL5, CCL19, CCR2, CD28, CD8A, CX3CR1, ITGAM, LYZ, PIK3CD, TLR4                                                                                                                                                                                                                                     | 14 |
| Cell-To-Cell Signaling and Interaction | recruitment  | recruitment of macrophages              | 3,06E-07 | C3AR1, CCL2, CCL4, CCR2, CCR5, CD8A, CX3CR1, ETS1, ITGB2, TLR4                                                                                                                                                                                                                                                              | 10 |
| Cell-To-Cell Signaling and Interaction | selection    | selection of T lymphocytes              | 1,38E-11 | CD28, CD1D, CD3D, CD3E, DOCK2, FAS, HLA-DOA, ITK, PTPRC, SIT1, TRAT1, VAV1                                                                                                                                                                                                                                                  | 12 |
| Cell-To-Cell Signaling and Interaction | phagocytosis | phagocytosis of cells                   | 1,68E-11 | C1QA, CD47, CORO1A, CSF2RB, FAS, FCER1G, FCGR1A, FCGR2A, FCGR3B, HCK, IRF8, ITGAM, ITGAX, ITGB2, LY75, LYN, PRKCB, RAC2, SELPLG, TLR4,                                                                                                                                                                                      | 21 |



| Interaction                            |                   |                                             |          | VAV1                                                                                                                                                                                                                                                                                                                                                                                                                                                                                                                            |    |
|----------------------------------------|-------------------|---------------------------------------------|----------|---------------------------------------------------------------------------------------------------------------------------------------------------------------------------------------------------------------------------------------------------------------------------------------------------------------------------------------------------------------------------------------------------------------------------------------------------------------------------------------------------------------------------------|----|
| Cell-To-Cell Signaling and Interaction | phagocytosis      | phagocytosis of blood cells                 | 2,67E-10 | CD47, CORO1A, CSF2RB, FAS, FCGR1A, FCGR2A, FCGR3B, HCK, IRF8, ITGAM, ITGB2, LYN, RAC2, SELPLG, TLR4                                                                                                                                                                                                                                                                                                                                                                                                                             | 15 |
| Cell-To-Cell Signaling and Interaction | phagocytosis      | phagocytosis of myeloid cells               | 6,32E-10 | CD47, CORO1A, CSF2RB, FCGR2A, FCGR3B, IRF8, ITGAM, ITGB2, SELPLG, TLR4                                                                                                                                                                                                                                                                                                                                                                                                                                                          | 10 |
| Cell-To-Cell Signaling and Interaction | phagocytosis      | phagocytosis of eukaryotic cells            | 1,94E-09 | CD47, CORO1A, CSF2RB, FAS, FCGR1A, FCGR2A, FCGR3B, HCK, IRF8, ITGAM, ITGB2, LYN, PRKCB, RAC2, SELPLG, TLR4, VAV1                                                                                                                                                                                                                                                                                                                                                                                                                | 17 |
| Cell-To-Cell Signaling and Interaction | phagocytosis      | phagocytosis of neutrophils                 | 4,30E-09 | CD47, CORO1A, CSF2RB, FCGR2A, FCGR3B, ITGAM, ITGB2, SELPLG, TLR4                                                                                                                                                                                                                                                                                                                                                                                                                                                                | 9  |
| Cell-To-Cell Signaling and Interaction | phagocytosis      | phagocytosis of leukocytes                  | 1,66E-07 | CD47, CORO1A, CSF2RB, FAS, FCGR2A, FCGR3B, IRF8, ITGAM, ITGB2, SELPLG, TLR4                                                                                                                                                                                                                                                                                                                                                                                                                                                     | 11 |
| Cell-To-Cell Signaling and Interaction | phagocytosis      | phagocytosis of red blood cells             | 4,43E-07 | FCGR1A, FCGR2A, HCK, ITGAM, ITGB2, LYN, RAC2                                                                                                                                                                                                                                                                                                                                                                                                                                                                                    | 7  |
| Cell-To-Cell Signaling and Interaction | phagocytosis      | phagocytosis of phagocytes                  | 6,53E-07 | CD47, CORO1A, CSF2RB, FAS, FCGR2A, FCGR3B, ITGAM, ITGB2, SELPLG, TLR4                                                                                                                                                                                                                                                                                                                                                                                                                                                           | 10 |
| Cell-To-Cell Signaling and Interaction | signaling         | signaling of blood cells                    | 2,81E-09 | CBL, CLEC7A, IL2RB, IL2RG, ITGAM, ITGB2, LCP2, PIK3CD, SH2D1A                                                                                                                                                                                                                                                                                                                                                                                                                                                                   | 9  |
| Cell-To-Cell Signaling and Interaction | signaling         | signaling of leukocytes                     | 1,20E-08 | CLEC7A, IL2RB, IL2RG, ITGAM, ITGB2, LCP2, PIK3CD, SH2D1A                                                                                                                                                                                                                                                                                                                                                                                                                                                                        | 8  |
| Cell-To-Cell Signaling and Interaction | signaling         | signaling of T lymphocytes                  | 5,39E-07 | IL2RB, IL2RG, ITGB2, LCP2, PIK3CD, SH2D1A                                                                                                                                                                                                                                                                                                                                                                                                                                                                                       | 6  |
| Cell-To-Cell Signaling and Interaction | attraction        | attraction of T lymphocytes                 | 9,44E-09 | CCL2, CCL4, CCL5, CCL19, CCL21, CCR5, CXCL9, TLR4, XCL1                                                                                                                                                                                                                                                                                                                                                                                                                                                                         | 9  |
| Cell-To-Cell Signaling and Interaction | attraction        | attraction of leukocytes                    | 9,45E-08 | CCL2, CCL4, CCL5, CCL19, CCL21, CCR5, CXCL6, CXCL9, IL12RB1, TLR4, XCL1                                                                                                                                                                                                                                                                                                                                                                                                                                                         | 11 |
| Cell-To-Cell Signaling and Interaction | attraction        | attraction of antigen presenting cells      | 1,83E-07 | CCL2, CCL4, CCL5, CCL19, CCL21, CXCL9, IL12RB1, TLR4                                                                                                                                                                                                                                                                                                                                                                                                                                                                            | 8  |
| Cell-To-Cell Signaling and Interaction | chemoattraction   | chemoattraction of antigen presenting cells | 1,29E-07 | CCL2, CCL4, CCL5, CCL19, CXCL9, IL12RB1, TLR4                                                                                                                                                                                                                                                                                                                                                                                                                                                                                   | 7  |
| Cell-To-Cell Signaling and Interaction | chemoattraction   | chemoattraction of macrophages              | 1,02E-06 | CCL2, CCL4, CCL5, CXCL9, IL12RB1                                                                                                                                                                                                                                                                                                                                                                                                                                                                                                | 5  |
| Cell-To-Cell Signaling and Interaction | stimulation       | stimulation of T lymphocytes                | 6,53E-07 | CD2, CD28, CD86, CD1D, FAS, ICOS, KLRD1, KLRK1, PTPRC, TNFSF13B                                                                                                                                                                                                                                                                                                                                                                                                                                                                 | 10 |
| Cell-To-Cell Signaling and Interaction | stimulation       | stimulation of eukaryotic cells             | 8,50E-07 | CCL5, CCND2, CD2, CD28, CD86, CD1D, CD8A, FAS, HGF, ICOS, IL2RB, KLRD1, KLRK1, LTF, PTPRC, TLR4, TNFSF13B                                                                                                                                                                                                                                                                                                                                                                                                                       | 17 |
| Cell-To-Cell Signaling and Interaction | cell-cell contact | cell-cell contact of leukocytes             | 1,76E-06 | ITGAL, ITGAM, ITGAX, ITGB2                                                                                                                                                                                                                                                                                                                                                                                                                                                                                                      | 4  |
| Immune Cell Trafficking                | activation        | activation of leukocytes                    | 1,47E-45 | BTK, C1QA, C3AR1, CCL2, CCL4, CCL5, CCR2, CD2, CD28, CD47, CD48, CD86, CD163, CD244, CD247, CD1B, CD1C, CD1D, CD1E, CD300A, CD3E, CD8A, CFH, CLEC4C, CLEC7A, CORO1A, CSF1R, CTLA4, CXCL6, CXCL9, DOCK2, FAS, FCER1G, FCGR1A, FCGR2A, FYB, GIMAP5, GZMA, GZMB, HCK, HLA-DMB, HLA-DOA, HLA-DQA1, HLA-DQB1, HLA-DRA, ICOS, IGHG1, IGHM, IL12RB1, IL2RB, ITGAL, ITGAM, ITGB2, ITGB6, ITK, JAK3, KLRD1, KLRK1, LAT2, LAX1, LCK, LCP2, LTF, LY96, LYN, PIK3CD, POU2AF1, PRF1, PSMB9, PTGES, PTPRC, SIRPG, SIT1, SLAMF6, STAT1, STAT4, | 86 |

|                         |            |                                        |          |                                                                                                                                                                                                                                                                                                                                                                                                                                                                                                  |    |
|-------------------------|------------|----------------------------------------|----------|--------------------------------------------------------------------------------------------------------------------------------------------------------------------------------------------------------------------------------------------------------------------------------------------------------------------------------------------------------------------------------------------------------------------------------------------------------------------------------------------------|----|
| Immune Cell Trafficking | activation | activation of mononuclear leukocytes   | 1,22E-39 | TBX21, TLR4, TLR7, TLR8 (includes EG:51311), TNC, TNFRSF17, TNFRSF1B, TNFSF13B, TYROBP, VAV1                                                                                                                                                                                                                                                                                                                                                                                                     | 69 |
| Immune Cell Trafficking | activation | activation of lymphocytes              | 3,94E-39 | BTK, C1QA, C3AR1, CCL2, CCL4, CCL5, CCR2, CD2, CD28, CD47, CD48, CD86, CD163, CD244, CD247, CD1B, CD1C, CD1D, CD1E, CD3E, CD8A, CLEC4C, CLEC7A, CORO1A, CTLA4, DOCK2, FAS, FCER1G, FCGR2A, GIMAP5, GZMA, GZMB, HLA-DRA, ICOS, IGHG1, IGHM, IL12RB1, IL2RB, ITGAL, ITGB2, ITK, JAK3, KLRD1, KLRK1, LAT2, LAX1, LCK, LTF, LY96, LYN, PIK3CD, POU2AF1, PRF1, PTPRC, SIRPG, SIT1, SLAMF6, STAT1, STAT4, TBX21, TLR4, TLR7, TLR8 (includes EG:51311), TNC, TNFRSF17, TNFRSF1B, TNFSF13B, TYROBP, VAV1 | 67 |
| Immune Cell Trafficking | activation | activation of T lymphocytes            | 3,31E-31 | C3AR1, CCL2, CCL4, CCL5, CCR2, CD2, CD28, CD47, CD48, CD86, CD244, CD247, CD1D, CD3E, CD8A, CLEC4C, CLEC7A, CORO1A, CTLA4, DOCK2, FAS, FCER1G, GIMAP5, GZMA, GZMB, HLA-DRA, ICOS, IGHG1, IL2RB, ITGAL, ITGB2, ITK, JAK3, KLRD1, LAT2, LAX1, LCK, PIK3CD, PRF1, PTPRC, SIRPG, SIT1, STAT1, STAT4, TBX21, TLR4, TLR7, TLR8 (includes EG:51311), TNC, TNFRSF1B, TYROBP, VAV1                                                                                                                        | 52 |
| Immune Cell Trafficking | activation | activation of antigen presenting cells | 1,93E-12 | CCL2, CCL4, CCL5, CD86, CD1D, CSF1R, FAS, FCER1G, FCGR1A, FCGR2A, HCK, HLA-DMB, HLA-DOA, HLA-DQA1, HLA-DQB1, IGHM, ITGB6, LTF, PSMB9, PTGES, STAT1, STAT4, TLR4, TLR7, TNFRSF1B                                                                                                                                                                                                                                                                                                                  | 25 |
| Immune Cell Trafficking | activation | activation of B lymphocytes            | 7,97E-11 | BTK, C1QA, CD86, CD8A, FAS, IGHG1, IGHM, LAT2, LAX1, LYN, PIK3CD, POU2AF1, PTPRC, TLR4, TNFRSF17, TNFSF13B, VAV1                                                                                                                                                                                                                                                                                                                                                                                 | 17 |
| Immune Cell Trafficking | activation | activation of natural killer cells     | 3,15E-10 | CCL5, CD2, CD28, CD244, CD1D, FCGR2A, IL12RB1, IL2RB, ITGAL, ITGB2, KLRD1, KLRK1, LTF, PRF1, SLAMF6, STAT4, TYROBP                                                                                                                                                                                                                                                                                                                                                                               | 17 |
| Immune Cell Trafficking | activation | activation of mast cells               | 1,71E-08 | CCL5, CCR2, CD48, CD300A, FCER1G, FCGR2A, FYB, ITGAM, LCP2, TLR7, TLR8 (includes EG:51311)                                                                                                                                                                                                                                                                                                                                                                                                       | 11 |
| Immune Cell Trafficking | activation | activation of cytotoxic T cells        | 8,02E-07 | CCR2, CD28, CD86, CD247, CTLA4, FAS, GZMA, GZMB, PRF1                                                                                                                                                                                                                                                                                                                                                                                                                                            | 9  |
| Immune Cell Trafficking | migration  | migration of leukocytes                | 6,11E-28 | CCL2, CCL4, CCL5, CCL19, CCL21, CCR2, CCR5, CCR6, CD2, CD28, CD47, CD48, CD69, CD86, CD247, CD3E, CD8A, CORO1A, CSF1R, CTLA4, CTSS, CX3CR1, CXCL6, CXCL9, CXCR4, CYTIP, DOCK2, ETS1, FAS, FCER1A, FCER1G, FCGR2A, FYB, GNA13, HCK, HGF, ICOS, IL10RA, IL12RB1, ITGAL, ITGAM, ITGAX, ITGB2, ITK, LCK, LTF, LUM, LYN, MMP7, PIK3CD, PRF1, PRKCB, PTGDR, PTPRC, RAC2, RASSF5, RGS1, RUNX3, SELPLG, SERPINA3, SOCS3, TLR4, TNFRSF1B, TNFSF13B, XCL1                                                  | 65 |
| Immune Cell Trafficking | migration  | migration of mononuclear leukocytes    | 2,65E-22 | CCL2, CCL4, CCL5, CCL19, CCL21, CCR2, CCR5, CCR6, CD2, CD28, CD47, CD48, CD69, CD86, CD247, CD3E, CD8A, CTLA4, CTSS, CX3CR1, CXCL9, CXCR4, CYTIP, DOCK2, ETS1, FAS, FCER1A, FYB, GNA13, HGF, ICOS, ITGAL, ITGAM, ITGAX, ITGB2, ITK, LCK, PRF1, RASSF5, SELPLG, SOCS3, TLR4, TNFRSF1B, TNFSF13B, XCL1                                                                                                                                                                                             | 45 |
| Immune Cell Trafficking | migration  | Lymphocyte migration                   | 3,97E-21 | CCL2, CCL4, CCL5, CCL19, CCL21, CCR2, CCR5, CCR6, CD2, CD28, CD47, CD48, CD69, CD86, CD247, CD3E, CD8A, CTLA4, CX3CR1, CXCL9, CXCR4, CYTIP, DOCK2, ETS1, FAS, FCER1A, FYB, GNA13, HGF, ICOS, ITGAL, ITGB2, ITK, LCK, PRF1, RASSF5, SELPLG, SOCS3, TLR4, TNFRSF1B, TNFSF13B, XCL1                                                                                                                                                                                                                 | 42 |
| Immune Cell Trafficking | migration  | T cell migration                       | 2,66E-13 | CCL2, CCL4, CCL5, CCL19, CCL21, CCR2, CCR5, CCR6, CD28, CD69, CD86, CTLA4, CXCL9, CXCR4, DOCK2, FAS, FYB, HGF, ICOS, ITGB2, ITK, LCK, PRF1, SELPLG, SOCS3, TLR4, XCL1                                                                                                                                                                                                                                                                                                                            | 27 |
| Immune Cell Trafficking | migration  | migration of bone marrow cells         | 1,12E-10 | CCL4, CCL5, CD47, CXCL6, CXCL9, CXCR4, FAS, FHL2, HCK, HIF1A, ITGAL, ITGAM, ITGAX, ITGB2, LTF, LUM, MMP7, PIK3CD, PTGDR, TLR4                                                                                                                                                                                                                                                                                                                                                                    | 20 |
| Immune Cell Trafficking | migration  | migration of phagocytes                | 4,42E-09 | CCL2, CCL5, CD47, CSF1R, CXCL6, FAS, HCK, ITGAL, ITGAM, ITGAX, ITGB2, LUM, MMP7, PIK3CD, PTGDR, RAC2, TLR4                                                                                                                                                                                                                                                                                                                                                                                       | 17 |
| Immune Cell Trafficking | migration  | migration of granulocytes              | 7,42E-09 | CCL4, CCL5, CD47, CXCL6, CXCL9, FAS, HCK, ITGAL, ITGAM, ITGAX, ITGB2, LTF, LUM, MMP7, PIK3CD, PTGDR, TLR4                                                                                                                                                                                                                                                                                                                                                                                        | 17 |

|                         |               |                                           |          |                                                                                                                                                                                                                                                                                                                                                                                          |    |
|-------------------------|---------------|-------------------------------------------|----------|------------------------------------------------------------------------------------------------------------------------------------------------------------------------------------------------------------------------------------------------------------------------------------------------------------------------------------------------------------------------------------------|----|
| Immune Cell Trafficking | migration     | migration of neutrophils                  | 3,31E-08 | CCL5, CD47, CXCL6, FAS, HCK, ITGAL, ITGAM, ITGAX, ITGB2, LUM, MMP7, PIK3CD, PTGDR, TLR4                                                                                                                                                                                                                                                                                                  | 14 |
| Immune Cell Trafficking | migration     | migration of antigen presenting cells     | 9,83E-08 | CCL2, CCL4, CCL5, CCL19, CCL21, CCR2, CCR5, CD86, CSF1R, CXCL9, CXCR4, IL10RA, PTGDR, RAC2, RUNX3                                                                                                                                                                                                                                                                                        | 15 |
| Immune Cell Trafficking | migration     | migration of dendritic cells              | 1,26E-07 | CCL4, CCL5, CCL19, CCL21, CCR2, CCR5, CD86, CXCL9, CXCR4, IL10RA, PTGDR, RAC2, RUNX3                                                                                                                                                                                                                                                                                                     | 13 |
| Immune Cell Trafficking | cell movement | cell movement of leukocytes               | 1,39E-20 | CASP1, CCL2, CCL4, CCL5, CCL19, CCL21, CCR2, CCR5, CCR6, CD2, CD28, CD47, CD48, CD86, CFH, CORO1A, CSF1R, CTLA4, CTSS, CX3CR1, CXCL6, CXCL9, CXCR4, FAS, FCER1G, FCGR2A, GNA13, HCK, HGF, HIF1A, IGHG1, IL12RB1, IL2RB, ITGAL, ITGAM, ITGAX, ITGB2, ITK, LYN, PIK3CD, POU2AF1, PRF1, PRKCB, PTGDR, PTGES, PTPRC, RAC2, RGS1, RUNX3, SELPLG, SERPINA3, SOCS3, STAT1, TLR4, TNFRSF1B, XCL1 | 56 |
| Immune Cell Trafficking | cell movement | cell movement of phagocytes               | 4,85E-16 | CASP1, CCL2, CCL4, CCL5, CCL21, CCR2, CCR5, CCR6, CD28, CD47, CFH, CORO1A, CSF1R, CX3CR1, CXCL6, CXCL9, FAS, FCER1G, FCGR2A, HCK, HGF, HIF1A, IL12RB1, ITGAL, ITGAM, ITGAX, ITGB2, PIK3CD, PTGDR, PTGES, RAC2, SELPLG, SOCS3, TLR4, TNFRSF1B, XCL1                                                                                                                                       | 36 |
| Immune Cell Trafficking | cell movement | cell movement of myeloid cells            | 9,97E-16 | CASP1, CCL2, CCL4, CCL5, CCL21, CCR2, CD2, CD28, CD47, CD48, CFH, CORO1A, CXCL6, CXCL9, FAS, FCER1G, FCGR2A, HCK, HGF, IL2RB, ITGAL, ITGAM, ITGAX, ITGB2, ITK, PIK3CD, PTGDR, PTPRC, RAC2, RUNX3, SELPLG, SOCS3, TLR4, TNFRSF1B, XCL1                                                                                                                                                    | 35 |
| Immune Cell Trafficking | cell movement | cell movement of granulocytes             | 5,63E-15 | CASP1, CCL2, CCL4, CCL5, CCL21, CCR2, CD2, CD28, CD47, CD48, CFH, CORO1A, CXCL6, CXCL9, FAS, FCER1G, FCGR2A, HCK, HGF, IL2RB, ITGAL, ITGAM, ITGAX, ITGB2, ITK, PIK3CD, PTGDR, RAC2, RUNX3, SELPLG, SOCS3, TLR4, TNFRSF1B, XCL1                                                                                                                                                           | 34 |
| Immune Cell Trafficking | cell movement | cell movement of mononuclear leukocytes   | 2,05E-14 | CCL2, CCL4, CCL5, CCL19, CCL21, CCR2, CCR5, CD28, CD47, CD86, CTLA4, CTSS, CXCL9, CXCR4, FAS, GNA13, IGHG1, ITGAL, ITGAX, ITGB2, ITK, PIK3CD, POU2AF1, PRF1, PRKCB, PTGDR, PTGES, RAC2, RGS1, SELPLG, SERPINA3, SOCS3, TLR4, XCL1                                                                                                                                                        | 34 |
| Immune Cell Trafficking | cell movement | cell movement of neutrophils              | 2,82E-13 | CASP1, CCL2, CCL4, CCL5, CCL21, CCR2, CD28, CD47, CFH, CORO1A, CXCL6, FAS, FCER1G, FCGR2A, HCK, HGF, ITGAL, ITGAM, ITGAX, ITGB2, PIK3CD, PTGDR, RAC2, SELPLG, SOCS3, TLR4, TNFRSF1B, XCL1                                                                                                                                                                                                | 28 |
| Immune Cell Trafficking | cell movement | cell movement of lymphocytes              | 1,59E-12 | CCL2, CCL4, CCL5, CCL19, CCL21, CCR2, CCR5, CD28, CD86, CTLA4, CXCL9, CXCR4, FAS, GNA13, IGHG1, ITGB2, ITK, PIK3CD, POU2AF1, PRF1, PTGDR, PTGES, RAC2, RGS1, SELPLG, SOCS3, TLR4, XCL1                                                                                                                                                                                                   | 28 |
| Immune Cell Trafficking | cell movement | cell movement of antigen presenting cells | 8,60E-10 | CCL2, CCL4, CCL5, CCL19, CCL21, CCR2, CCR5, CCR6, CD86, CSF1R, CX3CR1, CXCL9, HGF, HIF1A, IL12RB1, ITGB2, PIK3CD, PTGDR, PTGES, RAC2, TLR4                                                                                                                                                                                                                                               | 21 |
| Immune Cell Trafficking | cell movement | cell movement of T lymphocytes            | 8,64E-10 | CCL2, CCL4, CCL5, CCL19, CCL21, CCR2, CCR5, CD28, CD86, CTLA4, CXCL9, CXCR4, FAS, ITGB2, ITK, PRF1, SELPLG, SOCS3, TLR4, XCL1                                                                                                                                                                                                                                                            | 20 |
| Immune Cell Trafficking | cell movement | cell movement of B lymphocytes            | 5,22E-08 | CCL19, CCL21, CCR2, CXCL9, PIK3CD, POU2AF1, RAC2, RGS1, SELPLG, TLR4                                                                                                                                                                                                                                                                                                                     | 10 |
| Immune Cell Trafficking | cell movement | cell movement of macrophages              | 6,26E-08 | CCL2, CCL4, CCL5, CCR2, CCR5, CCR6, CSF1R, CX3CR1, CXCL9, HGF, HIF1A, IL12RB1, ITGB2, PIK3CD, PTGES, RAC2                                                                                                                                                                                                                                                                                | 16 |
| Immune Cell Trafficking | cell movement | cell movement of memory T lymphocytes     | 1,29E-07 | CCL2, CCL5, CCL19, CCL21, CD28, CXCL9, ITGB2                                                                                                                                                                                                                                                                                                                                             | 7  |
| Immune Cell Trafficking | cell movement | cell movement of eosinophils              | 1,67E-07 | CCL2, CCL5, CCL21, CD2, CD47, CD48, CXCL9, IL2RB, ITGAL, ITGAM, ITGB2, ITK, RUNX3                                                                                                                                                                                                                                                                                                        | 13 |
| Immune Cell Trafficking | cell movement | cell movement of bone marrow cells        | 4,66E-07 | CCL2, CCL4, CD47, CXCL9, ITGAL, ITGAM, ITGAX, ITGB2, PIK3CD, PTGDR, TLR4                                                                                                                                                                                                                                                                                                                 | 11 |
| Immune Cell Trafficking | cell movement | cell movement of mononuclear cells        | 1,63E-06 | CCL2, CCL4, CCR2, CCR5, CIITA, ICOS, JAK3, NFKBIZ                                                                                                                                                                                                                                                                                                                                        | 8  |
| Immune Cell Trafficking | adhesion      | adhesion of leukocytes                    | 5,56E-17 | BTK, C1QA, CCL2, CCL4, CCL5, CCL19, CCL21, CD2, CD28, CD47, CD48, CORO1A, CXCL9, FAS, FCGR2A, FYB, HCK, HGF, ICOS, ITGAL, ITGAM, ITGAX, ITGB2, ITK, LCP1, LYN, PIK3CD, PTPRC, RAC2, RASSF5, RGS1,                                                                                                                                                                                        | 34 |

SELPLG, TLR4, VAV1

|                         |              |                                         |          |                                                                                                                                                                                                                                           |    |
|-------------------------|--------------|-----------------------------------------|----------|-------------------------------------------------------------------------------------------------------------------------------------------------------------------------------------------------------------------------------------------|----|
| Immune Cell Trafficking | adhesion     | adhesion of mononuclear leukocytes      | 1,35E-16 | BTK, CCL2, CCL4, CCL5, CCL19, CCL21, CD2, CD28, CD47, CD48, CXCL9, FAS, FYB, HGF, ICOS, ITGAL, ITGAM, ITGAX, ITGB2, ITK, LCP1, RASSF5, RGS1, SELPLG, TLR4, VAV1                                                                           | 26 |
| Immune Cell Trafficking | adhesion     | adhesion of lymphocytes                 | 5,88E-14 | BTK, CCL2, CCL4, CCL19, CCL21, CD2, CD28, CD47, CD48, CXCL9, FAS, FYB, HGF, ICOS, ITGAL, ITGB2, ITK, RASSF5, RGS1, SELPLG, TLR4                                                                                                           | 21 |
| Immune Cell Trafficking | adhesion     | adhesion of T lymphocytes               | 7,51E-12 | CCL4, CCL19, CCL21, CD2, CD47, CD48, CXCL9, FAS, FYB, HGF, ICOS, ITGAL, ITGB2, ITK, RASSF5, SELPLG, TLR4                                                                                                                                  | 17 |
| Immune Cell Trafficking | adhesion     | adhesion of neutrophils                 | 4,19E-08 | CORO1A, ITGAL, ITGAM, ITGAX, ITGB2, LCP1, LYN, PIK3CD, SELPLG, TLR4, VAV1                                                                                                                                                                 | 11 |
| Immune Cell Trafficking | adhesion     | adhesion of granulocytes                | 3,07E-07 | CORO1A, HCK, ITGAL, ITGAM, ITGAX, ITGB2, LCP1, LYN, PIK3CD, SELPLG, TLR4, VAV1                                                                                                                                                            | 12 |
| Immune Cell Trafficking | homing       | homing of leukocytes                    | 2,52E-14 | CCL2, CCL4, CCL5, CCL19, CCL21, CCR2, CCR5, CD28, CORO1A, CX3CR1, CXCL6, CXCL9, CXCR4, FCER1G, FCGR2A, GNA13, HCK, IGHG1, IL12RB1, ITGAL, ITGAM, ITGB2, LYN, PIK3CD, PRKCB, PTGDR, PTPRC, RAC2, RGS1, SELPLG, SERPINA3, SOCS3, TLR4, XCL1 | 34 |
| Immune Cell Trafficking | homing       | homing of lymphocytes                   | 3,18E-10 | CCL2, CCL4, CCL5, CCL19, CCL21, CCR2, CCR5, CXCL9, CXCR4, GNA13, IGHG1, PIK3CD, PTGDR, RAC2, RGS1, SELPLG, SOCS3, TLR4, XCL1                                                                                                              | 19 |
| Immune Cell Trafficking | homing       | homing of mononuclear leukocytes        | 3,40E-10 | CCL2, CCL4, CCL5, CCL19, CCL21, CCR2, CCR5, CXCL9, CXCR4, GNA13, IGHG1, ITGAL, PIK3CD, PRKCB, PTGDR, RAC2, RGS1, SELPLG, SERPINA3, SOCS3, TLR4, XCL1                                                                                      | 22 |
| Immune Cell Trafficking | homing       | homing of B lymphocytes                 | 1,83E-07 | CCL19, CCL21, CCR2, CXCL9, PIK3CD, RAC2, RGS1, TLR4                                                                                                                                                                                       | 8  |
| Immune Cell Trafficking | recruitment  | recruitment of leukocytes               | 2,05E-13 | AHR, C3AR1, CCL2, CCL4, CCL5, CCL19, CCL21, CCR2, CCR5, CCR6, CD28, CD8A, CX3CR1, CXCL9, CXCR4, ETS1, FCER1A, HIF1A, IGHG1, ITGAM, ITGB2, LYZ, PIK3CD, SELPLG, TLR4, TLR7                                                                 | 26 |
| Immune Cell Trafficking | recruitment  | recruitment of T lymphocytes            | 7,48E-10 | CCL2, CCL4, CCL5, CCL19, CCL21, CCR2, CCR6, CD8A, CXCL9, CXCR4, ETS1, FCER1A                                                                                                                                                              | 12 |
| Immune Cell Trafficking | recruitment  | recruitment of phagocytes               | 1,94E-09 | AHR, C3AR1, CCL2, CCL4, CCL5, CCL19, CCR2, CCR5, CD28, CD8A, CX3CR1, ETS1, ITGAM, ITGB2, LYZ, PIK3CD, TLR4                                                                                                                                | 17 |
| Immune Cell Trafficking | recruitment  | recruitment of lymphocytes              | 3,35E-09 | CCL2, CCL4, CCL5, CCL19, CCL21, CCR2, CCR6, CD8A, CX3CR1, CXCL9, CXCR4, ETS1, FCER1A                                                                                                                                                      | 13 |
| Immune Cell Trafficking | recruitment  | recruitment of antigen presenting cells | 1,07E-08 | C3AR1, CCL2, CCL4, CCL5, CCL19, CCR2, CCR5, CD8A, CX3CR1, ETS1, ITGB2, TLR4                                                                                                                                                               | 12 |
| Immune Cell Trafficking | recruitment  | recruitment of granulocytes             | 1,10E-08 | AHR, C3AR1, CCL2, CCL4, CCL5, CCL19, CCR2, CD28, CD8A, CX3CR1, CXCL9, IGHG1, ITGAM, LYZ, PIK3CD, TLR4                                                                                                                                     | 16 |
| Immune Cell Trafficking | recruitment  | recruitment of neutrophils              | 2,45E-08 | AHR, C3AR1, CCL2, CCL4, CCL5, CCL19, CCR2, CD28, CD8A, CX3CR1, ITGAM, LYZ, PIK3CD, TLR4                                                                                                                                                   | 14 |
| Immune Cell Trafficking | recruitment  | recruitment of macrophages              | 3,06E-07 | C3AR1, CCL2, CCL4, CCR2, CCR5, CD8A, CX3CR1, ETS1, ITGB2, TLR4                                                                                                                                                                            | 10 |
| Immune Cell Trafficking | chemotaxis   | chemotaxis of leukocytes                | 2,49E-13 | CCL2, CCL4, CCL5, CCL19, CCL21, CCR2, CCR5, CD28, CORO1A, CX3CR1, CXCL6, CXCL9, CXCR4, FCER1G, FCGR2A, GNA13, HCK, IL12RB1, ITGAL, ITGAM, ITGB2, LYN, PIK3CD, PRKCB, PTGDR, PTPRC, RAC2, RGS1, SERPINA3, SOCS3, TLR4, XCL1                | 32 |
| Immune Cell Trafficking | chemotaxis   | chemotaxis of mononuclear leukocytes    | 1,60E-08 | CCL2, CCL4, CCL5, CCL19, CCL21, CCR2, CCR5, CXCL9, CXCR4, GNA13, ITGAL, PRKCB, PTGDR, RAC2, RGS1, SERPINA3, SOCS3, TLR4, XCL1                                                                                                             | 19 |
| Immune Cell Trafficking | chemotaxis   | chemotaxis of lymphocytes               | 1,63E-08 | CCL2, CCL4, CCL5, CCL19, CCL21, CCR2, CCR5, CXCL9, CXCR4, GNA13, PTGDR, RAC2, RGS1, SOCS3, TLR4, XCL1                                                                                                                                     | 16 |
| Immune Cell Trafficking | chemotaxis   | chemotaxis of phagocytes                | 2,48E-08 | CCL2, CCL4, CCL5, CD28, CORO1A, CX3CR1, CXCL6, CXCL9, FCER1G, FCGR2A, HCK, IL12RB1, ITGAM, ITGB2, PIK3CD, RAC2, XCL1                                                                                                                      | 17 |
| Immune Cell Trafficking | chemotaxis   | chemotaxis of myeloid cells             | 1,27E-06 | CCL2, CCL4, CCL5, CD28, CORO1A, CXCL6, CXCL9, FCER1G, FCGR2A, HCK, ITGAM, ITGB2, PTPRC, RAC2, XCL1                                                                                                                                        | 15 |
| Immune Cell Trafficking | chemotaxis   | chemotaxis of neutrophils               | 1,41E-06 | CCL2, CCL4, CCL5, CD28, CORO1A, CXCL6, FCER1G, FCGR2A, HCK, ITGAM, ITGB2, RAC2, XCL1                                                                                                                                                      | 13 |
| Immune Cell Trafficking | chemotaxis   | chemotaxis of B lymphocytes             | 1,68E-06 | CCL19, CCL21, CCR2, CXCL9, RAC2, RGS1, TLR4                                                                                                                                                                                               | 7  |
| Immune Cell Trafficking | accumulation | accumulation of leukocytes              | 1,48E-11 | CCL2, CCL5, CCL21, CCR2, CCR5, CD28, CD86, CD1D, CTLA4, CX3CR1, CXCL9, CYBB, FAS, ICOS, IL10RA, IL2RG, ITGAL, ITGAM, ITGAX, ITGB2, RUNX3, SELPLG, SH2D2A, TLR4                                                                            | 24 |
| Immune Cell Trafficking | accumulation | accumulation of lymphocytes             | 2,17E-10 | CCL5, CCL21, CCR5, CD28, CD86, CD1D, CTLA4, FAS, ICOS, IL10RA, IL2RG, ITGAL, ITGB2, RUNX3, SH2D2A                                                                                                                                         | 15 |

|                         |                 |                                             |          |                                                                                                                                                                                                                                                                                                                                                                                                                                                                                                                                                                                                                        |     |
|-------------------------|-----------------|---------------------------------------------|----------|------------------------------------------------------------------------------------------------------------------------------------------------------------------------------------------------------------------------------------------------------------------------------------------------------------------------------------------------------------------------------------------------------------------------------------------------------------------------------------------------------------------------------------------------------------------------------------------------------------------------|-----|
| Immune Cell Trafficking | accumulation    | accumulation of T lymphocytes               | 4,33E-10 | CCL5, CCL21, CCR5, CD28, CD86, CTLA4, FAS, ICOS, IL10RA, IL2RG, ITGAL, RUNX3, SH2D2A                                                                                                                                                                                                                                                                                                                                                                                                                                                                                                                                   | 13  |
| Immune Cell Trafficking | accumulation    | accumulation of macrophages                 | 8,02E-07 | CCL2, CCL5, CCR2, CD28, CX3CR1, FAS, ITGAM, ITGAX, TLR4                                                                                                                                                                                                                                                                                                                                                                                                                                                                                                                                                                | 9   |
| Immune Cell Trafficking | transmigration  | transmigration of leukocytes                | 7,97E-11 | CCL2, CCL4, CCL5, CCL19, CD28, CD47, CD86, CTSS, CXCL9, CXCR4, ITGAL, ITGAM, ITGAX, ITGB2, PIK3CD, PTGDR, TLR4                                                                                                                                                                                                                                                                                                                                                                                                                                                                                                         | 17  |
| Immune Cell Trafficking | transmigration  | transmigration of mononuclear leukocytes    | 1,71E-08 | CCL2, CCL4, CCL5, CD28, CD47, CD86, CTSS, CXCR4, ITGAL, ITGAX, ITGB2                                                                                                                                                                                                                                                                                                                                                                                                                                                                                                                                                   | 11  |
| Immune Cell Trafficking | transmigration  | transmigration of granulocytes              | 6,48E-07 | CD47, CXCL9, ITGAL, ITGAM, ITGAX, ITGB2, PIK3CD, PTGDR, TLR4                                                                                                                                                                                                                                                                                                                                                                                                                                                                                                                                                           | 9   |
| Immune Cell Trafficking | transmigration  | transmigration of neutrophils               | 7,77E-07 | CD47, ITGAL, ITGAM, ITGAX, ITGB2, PIK3CD, PTGDR, TLR4                                                                                                                                                                                                                                                                                                                                                                                                                                                                                                                                                                  | 8   |
| Immune Cell Trafficking | infiltration    | infiltration by neutrophils                 | 9,60E-09 | CASP1, CCL4, CCL21, CCR2, CFH, FAS, FCER1G, HGF, ITGAL, ITGAM, ITGB2, RAC2, SOCS3, TLR4, TNFRSF1B, XCL1                                                                                                                                                                                                                                                                                                                                                                                                                                                                                                                | 16  |
| Immune Cell Trafficking | infiltration    | infiltration of leukocytes                  | 3,61E-08 | CCL2, CCL4, CCL19, CCL21, CCR2, CCR5, CD86, CSF1R, CTLA4, FAS, HIF1A, ITGAM, ITK, PRF1, PTGES, SELPLG, STAT1, TLR4, TNFRSF1B, XCL1                                                                                                                                                                                                                                                                                                                                                                                                                                                                                     | 20  |
| Immune Cell Trafficking | infiltration    | infiltration by T lymphocytes               | 1,38E-07 | CCL19, CCL21, CCR2, CCR5, CD86, CTLA4, FAS, ITK, PRF1, SELPLG, XCL1                                                                                                                                                                                                                                                                                                                                                                                                                                                                                                                                                    | 11  |
| Immune Cell Trafficking | chemoattraction | chemoattraction of antigen presenting cells | 1,29E-07 | CCL2, CCL4, CCL5, CCL19, CXCL9, IL12RB1, TLR4                                                                                                                                                                                                                                                                                                                                                                                                                                                                                                                                                                          | 7   |
| Immune Cell Trafficking | chemoattraction | chemoattraction of macrophages              | 1,02E-06 | CCL2, CCL4, CCL5, CXCL9, IL12RB1                                                                                                                                                                                                                                                                                                                                                                                                                                                                                                                                                                                       | 5   |
| Immune Cell Trafficking | trafficking     | trafficking of leukocytes                   | 4,51E-07 | CCL4, CCL5, CCL19, CCR2, CCR5, ITGB2, TLR4, TNFRSF1B                                                                                                                                                                                                                                                                                                                                                                                                                                                                                                                                                                   | 8   |
| Tissue Morphology       | quantity        | quantity of leukocytes                      | 1,59E-44 | AHR, BCL2A1, BTK, C1QA, CCL2, CCL5, CCL19, CCL21, CCR2, CCR6, CD28, CD47, CD69, CD86, CD244, CD247, CD1D, CD3D, CD3E, CD3G, CD8A, CFH, CIITA, CSF1R, CSF2RB, CTLA4, CTSS, CXCR4, CXCR6 (includes EG:10663), CYTIP, ETS1, FAS, FCER1A, FCER1G, FCGR1A, FCGR2A, FLI1, GNA13, HGF, HIF1A, HLA-DQA1, ICOS, IGHM, IGKC, IKZF1, IL10RA, IL12RB1, IL2RB, IL2RG, IL7R, IRF1, IRF4, IRF8, ITGAM, ITGB2, ITGB6, ITK, JAK3, LCK, LCP2, LYN, PIK3CD, PLSCR1, POU2AF1, PRDM1, PRF1, PTGES, PTPRC, RAC2, RUNX1, RUNX2, RUNX3, SELPLG, SIT1, SOCS3, STAT1, STAT4, TAP1, TBX21, TLR4, TNFRSF1B, TNFSF13B, TOX, TRA@, TYROBP, VAV1      | 86  |
| Tissue Morphology       | quantity        | quantity of blood cells                     | 5,67E-42 | AHR, BCL2A1, BTK, C1QA, CBL, CCL2, CCL5, CCL19, CCL21, CCR2, CCR6, CD28, CD47, CD69, CD86, CD244, CD247, CD1D, CD3D, CD3E, CD3G, CD8A, CFH, CIITA, CSF1R, CSF2RB, CTLA4, CTSS, CXCR4, CXCR6 (includes EG:10663), CYTIP, ETS1, FAS, FCER1A, FCER1G, FCGR1A, FCGR2A, FLI1, GNA13, HGF, HIF1A, HLA-DQA1, ICOS, IGHM, IGKC, IKZF1, IL10RA, IL12RB1, IL2RB, IL2RG, IL7R, IRF1, IRF4, IRF8, ITGAM, ITGB2, ITGB6, ITK, JAK3, LCK, LCP2, LYN, PIK3CD, PLSCR1, POU2AF1, PRDM1, PRF1, PTGES, PTPRC, RAC2, RUNX1, RUNX2, RUNX3, SELPLG, SIT1, SOCS3, STAT1, STAT4, TAP1, TBX21, TLR4, TNFRSF1B, TNFSF13B, TOX, TRA@, TYROBP, VAV1 | 87  |
| Tissue Morphology       | quantity        | quantity of lymphocytes                     | 2,59E-39 | AHR, BCL2A1, BTK, CCL19, CCL21, CCR2, CCR6, CD28, CD69, CD86, CD244, CD247, CD1D, CD3D, CD3E, CD3G, CIITA, CSF2RB, CTLA4, CTSS, CXCR4, CYTIP, ETS1, FAS, FCER1G, FCGR1A, FCGR2A, FLI1, GNA13, HIF1A, HLA-DQA1, ICOS, IGHM, IGKC, IKZF1, IL10RA, IL2RB, IL2RG, IL7R, IRF1, ITGAM, ITGB2, ITGB6, ITK, JAK3, LCK, LCP2, LYN, PIK3CD, POU2AF1, PRDM1, PRF1, PTPRC, RAC2, RUNX1, RUNX2, RUNX3, SELPLG, SIT1, SOCS3, STAT1, STAT4, TAP1, TBX21, TNFRSF1B, TNFSF13B, TOX, TRA@, TYROBP, VAV1                                                                                                                                  | 70  |
| Tissue Morphology       | quantity        | quantity of cells                           | 5,80E-34 | AHR, APAF1, ARNTL2, BCL2A1, BMP8B, BTK, C1QA, CBL, CCL2, CCL5, CCL19, CCL21, CCND2, CCR2, CCR5, CCR6, CD28, CD47, CD69, CD86, CD244, CD247, CD1D, CD3D, CD3E, CD3G, CD8A, CFH, CIITA, CSF1R, CSF2RB, CTLA4, CTSS, CX3CR1, CXCR4, CXCR6 (includes EG:10663), CYBB, CYTIP, DCK, ETS1, FAS, FCER1A, FCER1G, FCGR1A, FCGR2A, FLI1, GNA13,                                                                                                                                                                                                                                                                                  | 108 |

|                                   |               |                                           |          |                                                                                                                                                                                                                                                                                                                                                                                                                                                                                                                                                                                                                       |    |
|-----------------------------------|---------------|-------------------------------------------|----------|-----------------------------------------------------------------------------------------------------------------------------------------------------------------------------------------------------------------------------------------------------------------------------------------------------------------------------------------------------------------------------------------------------------------------------------------------------------------------------------------------------------------------------------------------------------------------------------------------------------------------|----|
|                                   |               |                                           |          | HGF, HIF1A, HLA-DQA1, ICOS, IGHG1, IGHM, IGJ, IGKC, IKZF1, IL10RA, IL12RB1, IL2RB, IL2RG, IL7R, IRF1, IRF4, IRF8, ITGAL, ITGAM, ITGB2, ITGB6, ITK, JAK3, KIF5C, LCK, LCP2, LEF1, LYN, MMP7, PIK3CD, PLSR1, POU2AF1, PRDM1, PRF1, PSMB10, PTGES, PTPRC, RAC2, RBL1, RGS10, RUNX1, RUNX2, RUNX3, SELPLG, SH2D1A, SIT1, SOCS3, SRGN, ST8SIA4, STAT1, STAT4, TAP1, TBX21, TLR4, TNC, TNFRSF1B, TNFSF13B, TOX, TRA@, TYROBP, VAV1                                                                                                                                                                                          |    |
| Tissue Morphology                 | quantity      | quantity of T lymphocytes                 | 8,24E-28 | AHR, BCL2A1, CCL19, CCL21, CCR2, CCR6, CD28, CD86, CD244, CD247, CD1D, CD3D, CD3E, CD3G, CIITA, CSF2RB, CTLA4, CTSS, CXCR4, ETS1, FAS, FLI1, IKZF1, IL10RA, IL2RB, IL2RG, IL7R, IRF1, ITGAM, ITGB2, ITK, JAK3, LCK, LCP2, PTPRC, RUNX1, RUNX2, RUNX3, SELPLG, SIT1, SOCS3, STAT1, TAP1, TBX21, TNFRSF1B, TNFSF13B, TOX, TRA@, VAV1                                                                                                                                                                                                                                                                                    | 49 |
| Tissue Morphology                 | quantity      | quantity of B lymphocytes                 | 1,56E-16 | AHR, BCL2A1, BTK, CCR6, CD28, CD69, CXCR4, FCER1G, FCGR1A, FCGR2A, GNA13, HIF1A, HLA-DQA1, ICOS, IGHM, IGKC, IL2RG, IL7R, ITGB2, JAK3, LYN, PIK3CD, POU2AF1, PRDM1, RAC2, TNFRSF1B, TNFSF13B, TRA@, VAV1                                                                                                                                                                                                                                                                                                                                                                                                              | 29 |
| Tissue Morphology                 | quantity      | quantity of antigen presenting cells      | 3,51E-13 | CCL2, CCL19, CCL21, CCR2, CCR6, CD47, CSF1R, CTLA4, CTSS, CXCR6 (includes EG:10663), FAS, IKZF1, IL12RB1, IRF1, IRF4, IRF8, ITGB2, ITGB6, PTGES, SELPLG, SOCS3, STAT4, TLR4, TYROBP                                                                                                                                                                                                                                                                                                                                                                                                                                   | 24 |
| Tissue Morphology                 | quantity      | quantity of granulocytes                  | 3,82E-12 | AHR, C1QA, CCR6, CD1D, CD8A, CFH, CSF2RB, FAS, FCER1A, FCGR1A, FLI1, IRF8, ITGB2, JAK3, LYN, PLSR1, RAC2, SELPLG, SOCS3, STAT4, TLR4, TNFRSF1B                                                                                                                                                                                                                                                                                                                                                                                                                                                                        | 22 |
| Tissue Morphology                 | quantity      | quantity of myeloid cells                 | 7,21E-12 | AHR, C1QA, CCR6, CD1D, CD8A, CFH, CSF2RB, FAS, FCER1A, FCGR1A, FLI1, IKZF1, IRF8, ITGB2, JAK3, LYN, PLSR1, RAC2, SELPLG, SOCS3, STAT4, TLR4, TNFRSF1B                                                                                                                                                                                                                                                                                                                                                                                                                                                                 | 23 |
| Tissue Morphology                 | quantity      | quantity of phagocytes                    | 1,16E-11 | AHR, C1QA, CCL2, CCR2, CCR6, CD1D, CFH, CSF1R, CTSS, CXCR6 (includes EG:10663), FAS, FCGR1A, IL12RB1, ITGB2, ITGB6, JAK3, PLSR1, PTGES, RAC2, SELPLG, SOCS3, STAT4, TLR4, TNFRSF1B                                                                                                                                                                                                                                                                                                                                                                                                                                    | 24 |
| Tissue Morphology                 | quantity      | quantity of natural killer cells          | 1,30E-11 | CD86, CD244, ETS1, ICOS, IL2RB, IL2RG, IRF1, JAK3, PIK3CD, PRF1, PTPRC, TBX21, TYROBP                                                                                                                                                                                                                                                                                                                                                                                                                                                                                                                                 | 13 |
| Tissue Morphology                 | quantity      | quantity of lymphatic system cells        | 1,67E-11 | AHR, C1QA, CCR6, CD1D, CD8A, CFH, CSF2RB, ETS1, FAS, FCER1A, FCGR1A, FLI1, IKZF1, IRF8, ITGB2, JAK3, LYN, PLSR1, PSMB10, RAC2, SELPLG, SOCS3, STAT4, TLR4, TNFRSF1B                                                                                                                                                                                                                                                                                                                                                                                                                                                   | 25 |
| Tissue Morphology                 | quantity      | quantity of natural killer T lymphocytes  | 1,68E-10 | CD1D, CD3E, CSF2RB, ETS1, IKZF1, IL2RB, IL2RG, PTPRC, TBX21, VAV1                                                                                                                                                                                                                                                                                                                                                                                                                                                                                                                                                     | 10 |
| Tissue Morphology                 | quantity      | quantity of thymocytes                    | 3,70E-10 | CD86, CD244, CD247, CD3E, CTLA4, ETS1, FAS, IL2RG, IL7R, ITK, JAK3, LCK, LCP2, RUNX1, RUNX3, TOX, TRA@                                                                                                                                                                                                                                                                                                                                                                                                                                                                                                                | 17 |
| Tissue Morphology                 | quantity      | quantity of dendritic cells               | 5,54E-10 | CCL19, CCL21, CCR2, CCR6, CD47, CTLA4, IKZF1, IRF1, IRF4, IRF8, ITGB2, TLR4, TYROBP                                                                                                                                                                                                                                                                                                                                                                                                                                                                                                                                   | 13 |
| Tissue Morphology                 | quantity      | quantity of intraepithelial T lymphocytes | 5,78E-10 | CCR6, IKZF1, IL2RG, IL7R, IRF1, PTPRC, TAP1                                                                                                                                                                                                                                                                                                                                                                                                                                                                                                                                                                           | 7  |
| Tissue Morphology                 | quantity      | quantity of neutrophils                   | 3,31E-08 | AHR, C1QA, CD1D, CFH, FAS, FCGR1A, ITGB2, JAK3, PLSR1, RAC2, SELPLG, SOCS3, TLR4, TNFRSF1B                                                                                                                                                                                                                                                                                                                                                                                                                                                                                                                            | 14 |
| Tissue Morphology                 | quantity      | quantity of plasma cells                  | 1,29E-07 | ICOS, IL7R, ITGB2, PRDM1, RAC2, TNFRSF1B, TNFSF13B                                                                                                                                                                                                                                                                                                                                                                                                                                                                                                                                                                    | 7  |
| Tissue Morphology                 | quantity      | quantity of macrophages                   | 1,07E-06 | CCL2, CCR2, CCR6, CSF1R, CTSS, CXCR6 (includes EG:10663), FAS, IL12RB1, ITGB6, PTGES, SELPLG, SOCS3, STAT4, TLR4                                                                                                                                                                                                                                                                                                                                                                                                                                                                                                      | 14 |
| Cellular Growth and Proliferation | proliferation | proliferation of blood cells              | 1,36E-42 | BTK, CBL, CCL4, CCND2, CCR2, CCR5, CD2, CD28, CD47, CD48, CD84, CD86, CD244, CD247, CD1D, CD3E, CD3G, CD8A, CLEC10A, CORO1A, CRTAM, CSF1R, CSF2RB, CTLA4, CXCR4, DOCK2, FAS, FLI1, FYB, HCK, HGF, HIF1A, HLA-E, ICOS, IDO1, IGHG1, IGHM, IGKC, IKZF1, IL10RA, IL2RB, IL2RG, IL7R, IRF1, IRF4, IRF8, ISG20, ITGAL, ITGAM, ITGAX, ITGB2, ITK, JAK3, KLRD1, KLRK1, LCK, LCP2, LEF1, LST1, LY75, LY86, LY96, LYN, MAP3K1, MLLT3, PIK3CD, PRDM1, PRKCB, PTPRC, RAC2, RUNX1, RUNX3, SASH3, SH2D1A, SH2D2A, SLAMF7, SOCS3, SRGN, STAT1, STAT4, TLR4, TLR7, TNFRSF17, TNFRSF1B, TNFSF13B, TOX, TRA@, TRD@, TYROBP, VAV1, XCL1 | 91 |
| Cellular Growth and Proliferation | proliferation | proliferation of leukocytes               | 2,92E-42 | BTK, CBL, CCL4, CCND2, CCR2, CCR5, CD2, CD28, CD47, CD48, CD84, CD86, CD244, CD247, CD1D, CD3E, CD3G, CD8A, CLEC10A, CORO1A, CRTAM, CSF1R, CSF2RB, CTLA4, CXCR4, DOCK2, FAS, FYB, HCK, HGF, HIF1A, HLA-E, ICOS, IDO1, IGHG1, IGHM, IGKC, IKZF1, IL10RA, IL2RB,                                                                                                                                                                                                                                                                                                                                                        | 88 |

|                                   |               |                                         |          |                                                                                                                                                                                                                                                                                                                                                                                                                                                                                                                                                                                                                                                                                                                                                                                                                                                                                                                 |     |
|-----------------------------------|---------------|-----------------------------------------|----------|-----------------------------------------------------------------------------------------------------------------------------------------------------------------------------------------------------------------------------------------------------------------------------------------------------------------------------------------------------------------------------------------------------------------------------------------------------------------------------------------------------------------------------------------------------------------------------------------------------------------------------------------------------------------------------------------------------------------------------------------------------------------------------------------------------------------------------------------------------------------------------------------------------------------|-----|
| Cellular Growth and Proliferation | proliferation | proliferation of mononuclear leukocytes | 2,10E-41 | IL2RG, IL7R, IRF1, IRF4, IRF8, ISG20, ITGAL, ITGAM, ITGAX, ITGB2, ITK, JAK3, KLRD1, KLRK1, LCK, LCP2, LEF1, LST1, LY75, LY86, LY96, LYN, MAP3K1, PIK3CD, PRDM1, PRKCB, PTPRC, RAC2, RUNX3, SASH3, SH2D1A, SH2D2A, SLAMF7, SOCS3, SRGN, STAT1, STAT4, TLR4, TLR7, TNFRSF17, TNFRSF1B, TNFSF13B, TOX, TRA@, TRD@, TYROBP, VAV1, XCL1                                                                                                                                                                                                                                                                                                                                                                                                                                                                                                                                                                              | 85  |
| Cellular Growth and Proliferation | proliferation | proliferation of lymphocytes            | 1,33E-40 | BTK, CBL, CCL4, CCND2, CCR2, CCR5, CD2, CD28, CD47, CD48, CD84, CD86, CD244, CD247, CD1D, CD3E, CD3G, CD8A, CLEC10A, CORO1A, CRTAM, CSF1R, CSF2RB, CTLA4, CXCR4, DOCK2, FAS, FYB, HCK, HIF1A, HLA-E, ICOS, IDO1, IGHG1, IGHM, IGKC, IKZF1, IL2RB, IL2RG, IL7R, IRF1, IRF4, IRF8, ISG20, ITGAL, ITGAM, ITGAX, ITGB2, ITK, JAK3, KLRD1, KLRK1, LCK, LCP2, LEF1, LST1, LY75, LY86, LY96, LYN, MAP3K1, PIK3CD, PRDM1, PRKCB, PTPRC, RAC2, RUNX3, SASH3, SH2D1A, SH2D2A, SLAMF7, SOCS3, SRGN, STAT1, STAT4, TLR4, TLR7, TNFRSF17, TNFRSF1B, TNFSF13B, TOX, TRA@, TRD@, VAV1, XCL1                                                                                                                                                                                                                                                                                                                                    | 84  |
| Cellular Growth and Proliferation | proliferation | proliferation of normal cells           | 3,92E-31 | AHR, AIF1, BCL2A1, BTK, C3AR1, CBL, CCL2, CCL4, CCL5, CCL19, CCL21, CCND2, CCR2, CCR5, CD2, CD28, CD47, CD48, CD84, CD86, CD244, CD247, CD1D, CD3E, CD3G, CD8A, CIITA, CLEC10A, CORO1A, CRTAM, CSF1R, CSF2RB, CTLA4, CXCL9, CXCR4, DOCK2, FAS, FCER1G, FLI1, FYB, GABBR1, GBP1 (includes EG:2633), GZMB, HCK, HGF, HIF1A, HLA-DPB1, HLA-E, ICOS, IDO1, IGHG1, IGHM, IGKC, IKZF1, IL10RA, IL2RB, IL2RG, IL7R, IRF1, IRF4, IRF8, ISG20, ITGAL, ITGAM, ITGAX, ITGB2, ITK, JAK3, KLRD1, KLRK1, LCK, LCP2, LEF1, LST1, LY75, LY86, LY96, LYN, MAP3K1, MLLT3, MMP7, PIK3CD, PRDM1, PRKCB, PTGES, PTPRC, RAC2, RBL1, RUNX1, RUNX2, RUNX3, SASH3, SH2D1A, SH2D2A, SLAMF7, SOCS3, SRGN, STAT1, STAT4, TLR4, TLR7, TNC, TNFAIP8, TNFRSF17, TNFRSF1B, TNFSF13B, TOX, TRA@, TRD@, TYROBP, VAV1, VCAN, XCL1                                                                                                                  | 113 |
| Cellular Growth and Proliferation | proliferation | proliferation of T lymphocytes          | 1,20E-29 | CBL, CCL4, CCR2, CCR5, CD2, CD28, CD47, CD48, CD84, CD86, CD244, CD247, CD3E, CD3G, CD8A, CLEC10A, CORO1A, CRTAM, CSF2RB, CTLA4, CXCR4, DOCK2, FAS, FYB, HLA-E, ICOS, IDO1, IGHG1, IGHM, IKZF1, IL2RB, IL2RG, IL7R, ISG20, ITGAL, ITGAM, ITGAX, ITGB2, ITK, JAK3, KLRD1, KLRK1, LCK, LCP2, PIK3CD, PRDM1, PTPRC, RAC2, RUNX3, SASH3, SH2D1A, SH2D2A, SOCS3, SRGN, STAT1, STAT4, TLR4, TNFRSF1B, TNFSF13B, TOX, TRA@, TRD@, VAV1, XCL1                                                                                                                                                                                                                                                                                                                                                                                                                                                                           | 64  |
| Cellular Growth and Proliferation | proliferation | proliferation of eukaryotic cells       | 1,56E-27 | AHR, AIF1, APAF1, BCL2A1, BTK, C3AR1, CASP1, CBL, CCL2, CCL4, CCL5, CCL19, CCL21, CCND2, CCR2, CCR5, CD2, CD28, CD47, CD48, CD84, CD86, CD244, CD247, CD1D, CD3E, CD3G, CD8A, CHEK2, CIITA, CLEC10A, CLEC7A, CORO1A, CRTAM, CSF1R, CSF2RB, CTLA4, CTSS, CXCL9, CXCR4, CYBB, DCK, DOCK2, ETS1, FAS, FCER1G, FLI1, FYB, GABBR1, GBP1 (includes EG:2633), GZMB, HCK, HGF, HIF1A, HLA-DPB1, HLA-E, ICOS, IDO1, IFI16, IGHG1, IGHM, IGKC, IKZF1, IL10RA, IL12RB1, IL2RB, IL2RG, IL7R, IRF1, IRF4, IRF8, ISG20, ITGAL, ITGAM, ITGAX, ITGB2, ITK, JAK3, KLRD1, KLRK1, LCK, LCP2, LEF1, LST1, LY75, LY86, LY96, LYN, MAP3K1, MLLT3, MMP7, PIK3CD, PLAC8, PLSCR1, PRDM1, PRKCB, PTGER4, PTGES, PTPRA, PTPRC, PTPRE, RAC2, RASSF5, RBL1, RUNX1, RUNX2, RUNX3, SASH3, SH2D1A, SH2D2A, SLAMF7, SOCS3, SRGN, STAT1, STAT4, TLR4, TLR7, TNC, TNFAIP8, TNFRSF17, TNFRSF1B, TNFSF13B, TOX, TRA@, TRD@, TYROBP, VAV1, VCAN, XCL1 | 129 |
| Cellular Growth and Proliferation | proliferation | proliferation of cells                  | 4,90E-24 | AHR, AIF1, APAF1, BCL11B, BCL2A1, BTK, C3AR1, CASP1, CBL, CCL2, CCL4, CCL5, CCL19, CCL21, CCND2, CCR2, CCR5, CD2, CD28, CD47, CD48, CD84, CD86, CD244, CD247, CD1D, CD3E, CD3G, CD8A, CDC7, CHEK2, CIITA, CLEC10A, CLEC7A, CORO1A, CRTAM, CSF1R, CSF2RB, CTLA4, CTSS, CXCL9, CXCR4, CYBB, DCK, DOCK2, ETS1, FAS, FCER1G, FLI1, FYB, GABBR1, GBP1 (includes EG:2633), GZMB, HCK, HCL51, HGF, HIF1A, HLA-DPB1, HLA-E, ICOS, IDO1, IFI16, IFITM1, IGHG1, IGHM, IGKC, IKZF1, IL10RA, IL12RB1, IL2RB, IL2RG, IL7R, IRF1, IRF4, IRF8, ISG20, ITGAL,                                                                                                                                                                                                                                                                                                                                                                   | 140 |

|                                   |               |                                       |          |                                                                                                                                                                                                                                                                                                                                                                                                                                                                                                                                                                                                                                                    |    |
|-----------------------------------|---------------|---------------------------------------|----------|----------------------------------------------------------------------------------------------------------------------------------------------------------------------------------------------------------------------------------------------------------------------------------------------------------------------------------------------------------------------------------------------------------------------------------------------------------------------------------------------------------------------------------------------------------------------------------------------------------------------------------------------------|----|
|                                   |               |                                       |          | ITGAM, ITGAX, ITGB2, ITK, JAK3, KLRD1, KLRK1, LAMP3, LCK, LCP2, LEF1, LST1, LY75, LY86, LY96, LYN, MAP3K1, MAP4K1, MLLT3, MMP7, NAP1L1, PIK3CD, PLAC8, PLD1, PLSCR1, PRDM1, PRKCB, PTGER4, PTGES, PTPRA, PTPRC, PTPRE, RAC2, RARRES1, RASSF5, RBL1, RUNX1, RUNX2, RUNX3, SASH3, SH2D1A, SH2D2A, SIRPG, SLAMF7, SOCS3, SRGN, STAT1, STAT4, STK4, TLR4, TLR7, TNC, TNFAIP8, TNFRSF17, TNFRSF1B, TNFSF13B, TOX, TRA@, TRD@, TYROBP, VAV1, VCAN, XCL1                                                                                                                                                                                                  |    |
| Cellular Growth and Proliferation | proliferation | proliferation of B lymphocytes        | 6,03E-18 | BTK, CBL, CCND2, CD86, CD244, CD3E, CD8A, FAS, HCK, HIF1A, IGHM, IGKC, IL2RG, IL7R, IRF4, IRF8, LEF1, LY75, LY86, LY96, LYN, MAP3K1, PIK3CD, PRKCB, PTPRC, SASH3, SLAMF7, STAT1, TLR4, TLR7, TNFRSF17, TNFSF13B, VAV1                                                                                                                                                                                                                                                                                                                                                                                                                              | 33 |
| Cellular Growth and Proliferation | proliferation | proliferation of leukocyte cell lines | 2,74E-08 | CD28, CD1D, CD3E, CD8A, CLEC7A, CSF1R, CSF2RB, DCK, HCK, IL10RA, IL12RB1, IL2RB, IL2RG, IL7R, JAK3, PTGER4, PTPRC, RUNX1, SOCS3, TNFRSF1B                                                                                                                                                                                                                                                                                                                                                                                                                                                                                                          | 20 |
| Cellular Growth and Proliferation | growth        | growth of blood cells                 | 3,57E-21 | AHR, BTK, CBL, CCL2, CCL4, CCND2, CCR6, CD2, CD28, CD86, CD163, CD244, CD3E, CSF1R, CTLA4, FAS, HGF, HIF1A, ICOS, IGHM, IL10RA, IL2RB, IL7R, IRF1, IRF8, JAK3, LCP2, LYN, MLLT3, PIK3CD, PRF1, RUNX1, SRGN, STAT4, TNFRSF1B, TNFSF13B, TOX                                                                                                                                                                                                                                                                                                                                                                                                         | 37 |
| Cellular Growth and Proliferation | growth        | growth of leukocytes                  | 9,23E-19 | AHR, BTK, CBL, CCL2, CCR6, CD2, CD28, CD86, CD244, CD3E, CSF1R, CTLA4, HGF, HIF1A, ICOS, IGHM, IL10RA, IL2RB, IL7R, IRF1, IRF8, JAK3, LCP2, LYN, MLLT3, PIK3CD, PRF1, SRGN, STAT4, TNFRSF1B, TNFSF13B, TOX                                                                                                                                                                                                                                                                                                                                                                                                                                         | 32 |
| Cellular Growth and Proliferation | growth        | growth of normal cells                | 2,25E-17 | AHR, AIF1, BTK, CBL, CCL2, CCL4, CCND2, CCR6, CD2, CD28, CD86, CD163, CD244, CD3E, CDC7, CSF1R, CTLA4, FAS, FHL2, HGF, HIF1A, ICOS, IGHG1, IGHM, IL10RA, IL2RB, IL7R, IRF1, IRF8, JAK3, LCP2, LYN, MAP3K1, MLLT3, MYCL1, PIK3CD, PRF1, RBL1, RUNX1, RUNX2, RUNX3, SOCS3, SRGN, STAT1, STAT4, TNFRSF1B, TNFSF13B, TOX, VAV1                                                                                                                                                                                                                                                                                                                         | 49 |
| Cellular Growth and Proliferation | growth        | growth of eukaryotic cells            | 2,38E-15 | ACSL5, AHR, AIF1, ARNTL2, BTK, CASP1, CBL, CCL2, CCL4, CCND2, CCR6, CD2, CD28, CD86, CD163, CD244, CD3E, CDC7, CSF1R, CSF2RB, CTLA4, CXCR4, DUSP5, ETS1, FAS, FCER1A, FCER1G, FHL2, FLI1, GABRP, GBP2, GZMB, HGF, HIF1A, ICOS, IDO1, IFI16, IGHG1, IGHM, IKZF1, IL10RA, IL12RB1, IL2RB, IL2RG, IL7R, IRF1, IRF8, JAK3, LCP1, LCP2, LEF1, LUM, LYN, MAP3K1, MLLT3, MMP7, MYCL1, PIK3CD, PLAC8, PLSCR1, PRDM1, PRF1, PRKCB, PTPN22, PTPRA, PYHIN1 (includes EG:149628), RASSF5, RBL1, RUNX1, RUNX2, RUNX3, SOCS3, SRGN, STAT1, STAT4, TNFAIP8, TNFRSF17, TNFRSF1B, TNFSF13B, TOX, TTF1, VAV1                                                         | 82 |
| Cellular Growth and Proliferation | growth        | growth of lymphocytes                 | 4,93E-15 | AHR, BTK, CBL, CCR6, CD2, CD28, CD86, CD244, CD3E, CTLA4, HIF1A, ICOS, IGHM, IL2RB, IL7R, IRF1, JAK3, LCP2, PIK3CD, PRF1, SRGN, STAT4, TNFRSF1B, TNFSF13B, TOX                                                                                                                                                                                                                                                                                                                                                                                                                                                                                     | 25 |
| Cellular Growth and Proliferation | growth        | growth of cells                       | 2,11E-10 | ACSL5, AHR, AIF1, ARNTL2, BCL2A1, BTK, CASP1, CBL, CCL2, CCL4, CCND2, CCR6, CD2, CD28, CD86, CD163, CD244, CD3E, CDC7, CORO1A, CSF1R, CSF2RB, CTLA4, CXCR4, DUSP5, ETS1, FAS, FCER1A, FCER1G, FHL2, FLI1, GABRP, GBP2, GZMB, HGF, HIF1A, ICOS, IDO1, IFI16, IGHG1, IGHM, IKZF1, IL10RA, IL12RB1, IL2RB, IL2RG, IL7R, IRF1, IRF8, ITGB6, JAK3, LCP1, LCP2, LEF1, LTF, LUM, LYN, MAP3K1, MLLT3, MMP7, MYCL1, PIK3CD, PLAC8, PLSCR1, PRDM1, PRF1, PRKCB, PSMB10, PTPN22, PTPRA, PYHIN1 (includes EG:149628), RASSF5, RBL1, RUNX1, RUNX2, RUNX3, SOCS3, SRGN, STAT1, STAT4, TAP1, TNFAIP8, TNFRSF17, TNFRSF1B, TNFSF13B, TOX, TTF1, UBE2L6, VAV1, VCAN | 90 |
| Cellular Growth and Proliferation | expansion     | expansion of blood cells              | 3,15E-18 | AHR, BTK, CBL, CCND2, CCR6, CD2, CD28, CD86, CD163, CD244, CD3E, CTLA4, ICOS, IGHM, IL10RA, IL7R, IRF1, JAK3, LCP2, LYN, MLLT3, PIK3CD, PRF1, RUNX1, SRGN, STAT4, TNFRSF1B, TNFSF13B, TOX                                                                                                                                                                                                                                                                                                                                                                                                                                                          | 29 |
| Cellular Growth and Proliferation | expansion     | expansion of leukocytes               | 9,08E-17 | AHR, BTK, CBL, CCR6, CD2, CD28, CD86, CD244, CD3E, CTLA4, ICOS, IGHM, IL10RA, IL7R, IRF1, JAK3, LCP2, LYN, MLLT3, PIK3CD, PRF1, SRGN, STAT4, TNFRSF1B, TNFSF13B, TOX                                                                                                                                                                                                                                                                                                                                                                                                                                                                               | 26 |
| Cellular Growth and Proliferation | expansion     | expansion of normal cells             | 3,05E-16 | AHR, BTK, CBL, CCND2, CCR6, CD2, CD28, CD86, CD163, CD244, CD3E, CTLA4, ICOS, IGHM, IL10RA, IL7R, IRF1, JAK3, LCP2, LYN, MLLT3, PIK3CD, PRF1, RBL1, RUNX1, SRGN, STAT4, TNFRSF1B, TNFSF13B, TOX                                                                                                                                                                                                                                                                                                                                                                                                                                                    | 30 |
| Cellular Growth and Proliferation | expansion     | expansion of lymphocytes              | 2,02E-15 | AHR, BTK, CBL, CCR6, CD2, CD28, CD86, CD244, CD3E, CTLA4, ICOS, IGHM, IL7R, IRF1, JAK3, LCP2, PIK3CD, PRF1, SRGN, STAT4, TNFRSF1B, TNFSF13B, TOX                                                                                                                                                                                                                                                                                                                                                                                                                                                                                                   | 23 |
| Cellular Growth and Proliferation | expansion     | expansion of T lymphocytes            | 6,68E-15 | AHR, CBL, CCR6, CD2, CD28, CD86, CD244, CD3E, CTLA4, ICOS, IGHM, IRF1, JAK3, LCP2, PIK3CD, PRF1, SRGN, STAT4, TNFRSF1B, TNFSF13B, TOX                                                                                                                                                                                                                                                                                                                                                                                                                                                                                                              | 21 |
| Cellular Growth and Proliferation | generation    | generation of                         | 2,46E-12 | CD28, CD86, HLA-DQB1, ICOS, IL10RA, IL12RB1, IL2RG, IL7R, IRF4, IRF8,                                                                                                                                                                                                                                                                                                                                                                                                                                                                                                                                                                              | 19 |



|                                   |                       |                                    |          |                                                                                                                                                                                                                                                                                                                                                                                                                                                                                                                                                                                                                                                                                                                                                                                                                                                                                                                                                                                                                                                                                                                                                                                                                                            |     |
|-----------------------------------|-----------------------|------------------------------------|----------|--------------------------------------------------------------------------------------------------------------------------------------------------------------------------------------------------------------------------------------------------------------------------------------------------------------------------------------------------------------------------------------------------------------------------------------------------------------------------------------------------------------------------------------------------------------------------------------------------------------------------------------------------------------------------------------------------------------------------------------------------------------------------------------------------------------------------------------------------------------------------------------------------------------------------------------------------------------------------------------------------------------------------------------------------------------------------------------------------------------------------------------------------------------------------------------------------------------------------------------------|-----|
| Growth and Proliferation          | ion                   | leukocytes                         |          | ITK, JAK3, LYN, PSMB9, SOCS3, STAT4, TBX21, TLR4, TNFSF13B                                                                                                                                                                                                                                                                                                                                                                                                                                                                                                                                                                                                                                                                                                                                                                                                                                                                                                                                                                                                                                                                                                                                                                                 |     |
| Cellular Growth and Proliferation | generation            | generation of lymphocytes          | 1,15E-11 | CD28, CD86, HLA-DQB1, ICOS, IL10RA, IL12RB1, IL2RG, IL7R, IRF4, ITK, JAK3, PSMB9, SOCS3, STAT4, TBX21, TLR4, TNFSF13B                                                                                                                                                                                                                                                                                                                                                                                                                                                                                                                                                                                                                                                                                                                                                                                                                                                                                                                                                                                                                                                                                                                      | 17  |
| Cellular Growth and Proliferation | generation            | generation of T lymphocytes        | 2,92E-11 | CD28, CD86, HLA-DQB1, ICOS, IL10RA, IL12RB1, IL2RG, ITK, JAK3, PSMB9, SOCS3, STAT4, TBX21, TLR4, TNFSF13B                                                                                                                                                                                                                                                                                                                                                                                                                                                                                                                                                                                                                                                                                                                                                                                                                                                                                                                                                                                                                                                                                                                                  | 15  |
| Cellular Growth and Proliferation | generation            | generation of helper T lymphocytes | 6,36E-07 | CD28, IL12RB1, JAK3, SOCS3, STAT4, TBX21, TNFSF13B                                                                                                                                                                                                                                                                                                                                                                                                                                                                                                                                                                                                                                                                                                                                                                                                                                                                                                                                                                                                                                                                                                                                                                                         | 7   |
| Cellular Growth and Proliferation | generation            | generation of Th1 cells            | 1,02E-06 | CD28, IL12RB1, JAK3, STAT4, TBX21                                                                                                                                                                                                                                                                                                                                                                                                                                                                                                                                                                                                                                                                                                                                                                                                                                                                                                                                                                                                                                                                                                                                                                                                          | 5   |
| Cellular Growth and Proliferation | stimulation           | stimulation of T lymphocytes       | 6,53E-07 | CD2, CD28, CD86, CD1D, FAS, ICOS, KLRD1, KLRK1, PTPRC, TNFSF13B                                                                                                                                                                                                                                                                                                                                                                                                                                                                                                                                                                                                                                                                                                                                                                                                                                                                                                                                                                                                                                                                                                                                                                            | 10  |
| Cellular Growth and Proliferation | stimulation           | stimulation of eukaryotic cells    | 8,50E-07 | CCL5, CCND2, CD2, CD28, CD86, CD1D, CD8A, FAS, HGF, ICOS, IL2RB, KLRD1, KLRK1, LTF, PTPRC, TLR4, TNFSF13B                                                                                                                                                                                                                                                                                                                                                                                                                                                                                                                                                                                                                                                                                                                                                                                                                                                                                                                                                                                                                                                                                                                                  | 17  |
| Inflammatory Disease              | inflammatory disorder | inflammatory disorder of mice      | 2,46E-33 | AOAH, BTK, C1QA, C3AR1, CASP1, CCL2, CCL5, CCR2, CCR5, CCR6, CD2, CD28, CD69, CD86, CD1D, CFH, CIITA, CTLA4, CTSS, CX3CR1, CXCR4, CYBB, FAS, FCER1A, FCER1G, FCGR1A, FCGR2A, GZMB, HCK, HGF, HLA-DQA1, HLA-DQB1, HLA-DRA, ICOS, IDO1, IGHG1, IGHM, IGKC, IL10RB, IL2RB, IRF4, ITGAL, ITGAM, ITGB2, ITGB6, ITK, JAK3, LTF, LYN, MMP7, MX2, PIK3CD, PRF1, PTGER4, PTPRC, RUNX3, SH2D1A, SH2D2A, SOCS3, STAT1, STAT4, TAP1, TBX21, TLR4, TNFRSF1B, TNFSF13B, TRA@, TYROBP, VAV1                                                                                                                                                                                                                                                                                                                                                                                                                                                                                                                                                                                                                                                                                                                                                               | 69  |
| Inflammatory Disease              | inflammatory disorder | inflammatory disorder of rodents   | 4,83E-33 | AOAH, BTK, C1QA, C3AR1, CASP1, CCL2, CCL5, CCR2, CCR5, CCR6, CD2, CD28, CD69, CD86, CD1D, CFH, CIITA, CTLA4, CTSS, CX3CR1, CXCR4, CYBB, FAS, FCER1A, FCER1G, FCGR1A, FCGR2A, GZMB, HCK, HGF, HLA-DQA1, HLA-DQB1, HLA-DRA, ICOS, IDO1, IGHG1, IGHM, IGKC, IL10RB, IL2RB, IRF4, ITGAL, ITGAM, ITGB2, ITGB6, ITK, JAK3, LTF, LUM, LYN, MMP7, MX2, PIK3CD, PRF1, PTGER4, PTPRC, RUNX3, SH2D1A, SH2D2A, SOCS3, STAT1, STAT4, TAP1, TBX21, TLR4, TNFRSF1B, TNFSF13B, TRA@, TYROBP, VAV1                                                                                                                                                                                                                                                                                                                                                                                                                                                                                                                                                                                                                                                                                                                                                          | 70  |
| Inflammatory Disease              | inflammatory disorder | inflammatory disorder              | 1,91E-21 | AHR, AIF1, AOAH, APAF1, ARNTL2, BCL2A1, BIRC3, BTK, C12ORF35, C1QA, C3AR1, CARD8, CASP1, CCL2, CCL4, CCL5, CCL19, CCL21, CCR2, CCR5, CCR6, CD2, CD28, CD48, CD52, CD53, CD69, CD86, CD163, CD247, CD1D, CD3D, CD3E, CD3G, CD8A, CDC7, CDC42SE2, CELF2, CFH, CHEK2, CIITA, CLEC7A, CSF2RB, CSMD2, CTLA4, CTSS, CX3CR1, CXCL6, CXCL9, CXCR4, CYBB, DAPP1, DCK, DOCK2, DUSP5, ERAP2, FAS, FCER1A, FCER1G, FCGR1A, FCGR2A, FCN1, FCRL3, FLI1, GABBR1, GABRP, GBP2, GIMAP2, GPSM3, GZMA, GZMB, HCK, HCLS1, HDAC9 (includes EG:9734), HGF, HIF1A, HLA-DMB, HLA-DOA, HLA-DPA1, HLA-DPB1, HLA-DQA1, HLA-DQB1, HLA-DRA, HLA-E, HLA-F, ICOS, IDO1, IGHG1, IGHM, IGKC, IGL@, IKZF1, IL10RA, IL10RB, IL2RB, IL2RG, IL7R, IRF4, ITGAL, ITGAM, ITGB2, ITGB6, ITK, JAK3, JAKMIP1, KLRB1, LCK, LCP1, LCP2, LST1, LTF, LUM, LY75, LYN, LYZ, MAP4K1, MCTP2, MLLT3, MMP7, MNDA, MS4A7, MX2, NCF4, NFKBIZ, NLRP3, P2RY13, PIK3CD, PLD1, POLE4, PRDM1, PRF1, PRKCB, PSMB9, PTGDR, PTGER4, PTPN22, PTPRC, RNF213, RUNX1, RUNX3, SERPINA3, SH2D1A, SH2D2A, SLC4A7, SNX20, SOCS3, SP140, STAT1, STAT4, STK10, TAGAP, TAP1, TBX21, TDO2, TLR4, TLR7, TLR8 (includes EG:51311), TMEM156, TNC, TNFRSF1B, TNFSF13B, TNIP3, TOX, TRA@, TYROBP, UBE2L6, VAV1, VNN2, XCL1 | 169 |
| Inflammatory Disease              | inflammatory disorder | inflammatory disorder of organ     | 1,31E-08 | CCL21, CD28, CD8A, CTLA4, FCER1G, HCK, ICOS, LCP2, LYN, MMP7, NFKBIZ, STAT1, TLR4, TNFSF13B                                                                                                                                                                                                                                                                                                                                                                                                                                                                                                                                                                                                                                                                                                                                                                                                                                                                                                                                                                                                                                                                                                                                                | 14  |
| Inflammatory Disease              | rheumatic disease     | rheumatic disease                  | 8,79E-16 | AIF1, APAF1, C12ORF35, C1QA, C3AR1, CARD8, CASP1, CCL2, CCL4, CCL5, CCL19, CCL21, CCR2, CCR5, CCR6, CD28, CD53, CD69, CD86, CD3D, CDC7, CELF2, CHEK2, CIITA, CSF2RB, CSMD2, CTLA4, CTSS, CXCL6, CXCL9, CXCR4, FAS, FCER1G, FCGR1A, FCGR2A, FCN1, FCRL3, FLI1, GABBR1, GABRP, GBP2, GIMAP2, GPSM3, GZMA, GZMB, HCK, HCLS1, HLA-DMB, HLA-DOA, HLA-DPA1, HLA-DPB1, HLA-DQA1, HLA-DQB1, HLA-DRA, HLA-                                                                                                                                                                                                                                                                                                                                                                                                                                                                                                                                                                                                                                                                                                                                                                                                                                          | 111 |

|                      |                                           |                                                      |          |                                                                                                                                                                                                                                                                                                                                                                                                                                                                                                                                                                                                                                                                                                                                                                              |     |
|----------------------|-------------------------------------------|------------------------------------------------------|----------|------------------------------------------------------------------------------------------------------------------------------------------------------------------------------------------------------------------------------------------------------------------------------------------------------------------------------------------------------------------------------------------------------------------------------------------------------------------------------------------------------------------------------------------------------------------------------------------------------------------------------------------------------------------------------------------------------------------------------------------------------------------------------|-----|
|                      |                                           |                                                      |          | E, ICOS, IGHG1, IGHM, IGKC, IGL@, IKZF1, IL10RA, IL2RB, IL7R, ITGAL, ITGAM, ITGB2, JAKMIP1, LCK, LCP1, LST1, LTF, LUM, LY75, LYN, LYZ, MAP4K1, MCTP2, MLLT3, MS4A7, NCF4, NLRP3, P2RY13, PLD1, PRDM1, PRKCB, PSMB9, PTGER4, PTPN22, PTPRC, RNF213, RUNX1, RUNX3, SERPINA3, SH2D1A, SOCS3, SP140, STAT1, STAT4, STK10, TAGAP, TAP1, TBX21, TLR4, TLR7, TMEM156, TNFRSF1B, TNFSF13B, TRA@, UBE2L6, XCL1                                                                                                                                                                                                                                                                                                                                                                        |     |
| Inflammatory Disease | rheumatic disease of rodents              | rheumatic disease of rodents                         | 1,12E-14 | CASP1, CCL2, CCL5, CCR2, CD69, CIITA, CTSS, FAS, FCER1G, FCGR1A, FCGR2A, ICOS, IGHG1, IL2RB, LTF, LUM, LYN, PTGER4, SH2D1A, SOCS3, STAT1, STAT4, TAP1, TBX21, TLR4, TNFRSF1B, TNFSF13B                                                                                                                                                                                                                                                                                                                                                                                                                                                                                                                                                                                       | 27  |
| Inflammatory Disease | rheumatic disease of mice                 | rheumatic disease of mice                            | 1,23E-13 | CASP1, CCL2, CCR2, CD69, CIITA, CTSS, FAS, FCER1G, FCGR1A, FCGR2A, ICOS, IGHG1, IL2RB, LTF, LYN, PTGER4, SH2D1A, SOCS3, STAT1, STAT4, TAP1, TBX21, TLR4, TNFRSF1B, TNFSF13B                                                                                                                                                                                                                                                                                                                                                                                                                                                                                                                                                                                                  | 25  |
| Inflammatory Disease | arthritis                                 | arthritis                                            | 3,35E-15 | AIF1, APAF1, C12ORF35, C1QA, C3AR1, CARD8, CASP1, CCL2, CCL4, CCL5, CCL19, CCL21, CCR2, CCR5, CCR6, CD28, CD53, CD69, CD86, CD3D, CDC7, CELF2, CHEK2, CIITA, CSF2RB, CSMD2, CTLA4, CTSS, CXCL6, CXCL9, CXCR4, FAS, FCER1G, FCGR1A, FCGR2A, FCN1, FCRL3, FLI1, GABBR1, GABRP, GBP2, GIMAP2, GPSM3, GZMA, GZMB, HCK, HCLS1, HLA-DMB, HLA-DOA, HLA-DPA1, HLA-DPB1, HLA-DQA1, HLA-DQB1, HLA-DRA, HLA-E, ICOS, IGHG1, IGHM, IGKC, IGL@, IKZF1, IL10RA, IL2RB, IL7R, ITGAL, ITGB2, JAKMIP1, LCP1, LST1, LTF, LUM, LY75, LYN, LYZ, MAP4K1, MCTP2, MLLT3, MS4A7, NCF4, NLRP3, P2RY13, PLD1, PRDM1, PRKCB, PSMB9, PTGER4, PTPN22, PTPRC, RNF213, RUNX1, RUNX3, SERPINA3, SOCS3, SP140, STAT1, STAT4, STK10, TAGAP, TAP1, TBX21, TLR4, TMEM156, TNFRSF1B, TNFSF13B, TRA@, UBE2L6, XCL1 | 107 |
| Inflammatory Disease | arthritis                                 | arthritis of rodents                                 | 1,11E-12 | CASP1, CCL2, CCL5, CCR2, CD69, CIITA, CTSS, FAS, FCER1G, FCGR1A, FCGR2A, ICOS, IGHG1, IL2RB, LTF, LUM, PTGER4, SOCS3, STAT1, STAT4, TBX21, TLR4, TNFRSF1B, TNFSF13B                                                                                                                                                                                                                                                                                                                                                                                                                                                                                                                                                                                                          | 24  |
| Inflammatory Disease | arthritis                                 | arthritis of mice                                    | 1,20E-11 | CASP1, CCL2, CCR2, CD69, CIITA, CTSS, FAS, FCER1G, FCGR1A, FCGR2A, ICOS, IGHG1, IL2RB, LTF, PTGER4, SOCS3, STAT1, STAT4, TBX21, TLR4, TNFRSF1B, TNFSF13B                                                                                                                                                                                                                                                                                                                                                                                                                                                                                                                                                                                                                     | 22  |
| Inflammatory Disease | experimental autoimmune encephalomyelitis | experimental autoimmune encephalomyelitis of rodents | 3,18E-12 | C3AR1, CASP1, CCR2, CCR6, CD28, CD86, CD1D, CTLA4, CX3CR1, FAS, HLA-DQA1, HLA-DQB1, ICOS, IDO1, IGHG1, IRF4, ITGAL, LYN, STAT1, STAT4, TBX21, TLR4, TYROBP                                                                                                                                                                                                                                                                                                                                                                                                                                                                                                                                                                                                                   | 23  |
| Inflammatory Disease | experimental autoimmune encephalomyelitis | experimental autoimmune encephalomyelitis of mice    | 6,84E-12 | C3AR1, CASP1, CCR2, CCR6, CD28, CD86, CD1D, CTLA4, CX3CR1, FAS, HLA-DQA1, HLA-DQB1, ICOS, IDO1, IRF4, ITGAL, LYN, STAT1, STAT4, TBX21, TLR4, TYROBP                                                                                                                                                                                                                                                                                                                                                                                                                                                                                                                                                                                                                          | 22  |
| Inflammatory Disease | dermatitis                                | dermatitis                                           | 7,10E-12 | CASP1, CCL5, CD2, CD52, CD1D, CXCR4, DUSP5, FCER1A, FCER1G, HDAC9 (includes EG:9734), HLA-DQA1, HLA-DRA, IGHM, IGKC, IL2RB, IL2RG, ITGAL, ITGB2, LCP2, NFKBIZ, PIK3CD, SOCS3, STAT1, TLR4                                                                                                                                                                                                                                                                                                                                                                                                                                                                                                                                                                                    | 24  |
| Inflammatory Disease | encephalitis                              | encephalitis                                         | 1,16E-11 | C3AR1, CASP1, CCR2, CCR6, CD28, CD86, CD1D, CTLA4, CX3CR1, FAS, HIF1A, HLA-DQA1, HLA-DQB1, ICOS, IDO1, IGHG1, IRF4, ITGAL, LYN, STAT1, STAT4, TBX21, TLR4, TYROBP                                                                                                                                                                                                                                                                                                                                                                                                                                                                                                                                                                                                            | 24  |
| Inflammatory Disease | rheumatoid arthritis                      | rheumatoid arthritis                                 | 1,26E-11 | AIF1, C12ORF35, C1QA, C3AR1, CARD8, CCL2, CCL4, CCL5, CCL19, CCL21, CCR2, CCR5, CCR6, CD28, CD53, CD69, CD86, CD3D, CDC7, CELF2, CHEK2, CIITA, CSF2RB, CSMD2, CTLA4, CXCL6, CXCL9, CXCR4, FCGR2A, FCN1, FCRL3, FLI1, GABBR1, GABRP, GBP2, GIMAP2, GPSM3, GZMA, GZMB, HCK, HCLS1, HLA-DMB, HLA-DOA, HLA-DPA1, HLA-DPB1, HLA-DQA1, HLA-DQB1, HLA-DRA, ICOS, IGHG1, IGHM, IGL@, IKZF1, IL10RA, IL2RB, IL7R, ITGAL, ITGB2, JAKMIP1, LCP1, LST1, LTF, LY75, LYZ, MLLT3, MS4A7, NCF4, P2RY13, PLD1, PRDM1, PSMB9, PTGER4, PTPN22, PTPRC, RNF213, RUNX1, SERPINA3, SOCS3, SP140, STAT1, STAT4, STK10, TAGAP, TAP1, TLR4, TMEM156, TNFRSF1B, TNFSF13B, UBE2L6, XCL1                                                                                                                  | 90  |
| Inflammatory Disease | colitis                                   | colitis                                              | 5,53E-11 | CASP1, CCR2, CCR5, CD86, CD247, CD3D, CD3E, CD3G, CTLA4, FAS, FCER1A, IGHM, IL10RB, MMP7, PTGER4, RUNX3, SOCS3, STAT4, TLR4, TRA@                                                                                                                                                                                                                                                                                                                                                                                                                                                                                                                                                                                                                                            | 20  |
| Inflammatory Disease | experimentally                            | experimentally                                       | 1,81E-10 | CCL4, CCR2, CCR5, CD69, CTLA4, CTSS, FAS, FCGR1A, FCGR2A, ICOS,                                                                                                                                                                                                                                                                                                                                                                                                                                                                                                                                                                                                                                                                                                              | 19  |

|                      |                                  |                                          |          |                                                                                                                     |    |
|----------------------|----------------------------------|------------------------------------------|----------|---------------------------------------------------------------------------------------------------------------------|----|
| Disease              | mentally-induced arthritis       | -induced arthritis                       |          | IGHG1, IL2RB, PTGER4, STAT1, STAT4, TBX21, TLR4, TNFRSF1B, TNFSF13B                                                 |    |
| Inflammatory Disease | experimentally-induced arthritis | experimentally-induced arthritis of mice | 8,77E-10 | CCR2, CD69, CTSS, FAS, FCGR1A, FCGR2A, ICOS, IGHG1, IL2RB, PTGER4, STAT1, STAT4, TBX21, TLR4, TNFRSF1B, TNFSF13B    | 16 |
| Inflammatory Disease | collagen-induced arthritis       | collagen-induced arthritis of mice       | 1,05E-09 | CCR2, CD69, CTSS, FAS, ICOS, IGHG1, IL2RB, PTGER4, STAT1, STAT4, TBX21, TLR4, TNFRSF1B, TNFSF13B                    | 14 |
| Inflammatory Disease | collagen-induced arthritis       | collagen-induced arthritis               | 1,22E-09 | CCR2, CD69, CTLA4, CTSS, FAS, ICOS, IGHG1, IL2RB, PTGER4, STAT1, STAT4, TBX21, TLR4, TNFRSF1B, TNFSF13B             | 15 |
| Inflammatory Disease | glomerulonephritis               | glomerulonephritis of mice               | 1,66E-09 | C1QA, CD2, CD28, CD1D, CFH, CTLA4, FAS, ICOS, ITGAL, LYN, PTPRC, SH2D2A                                             | 12 |
| Inflammatory Disease | glomerulonephritis               | glomerulonephritis                       | 1,11E-07 | C1QA, CCL4, CCL5, CD2, CD28, CD1D, CFH, CTLA4, FAS, ICOS, ITGAL, LYN, PTPRC, SH2D2A, TNFSF13B                       | 15 |
| Inflammatory Disease | nephritis                        | nephritis of animal                      | 1,77E-09 | C1QA, CD2, CD28, CD1D, CFH, CTLA4, FAS, ICOS, ITGAL, LYN, PTPRC, SH2D2A, TLR4                                       | 13 |
| Inflammatory Disease | nephritis                        | nephritis                                | 2,02E-09 | C1QA, CCL4, CCL5, CD2, CD28, CD1D, CD8A, CFH, CTLA4, FAS, HLA-DQB1, ICOS, ITGAL, LYN, PTPRC, SH2D2A, TLR4, TNFSF13B | 18 |
| Inflammatory Disease | airway hyperresponsiveness       | airway hyperresponsiveness of organism   | 1,89E-09 | C3AR1, CD86, CD1D, CXCR4, HGF, ICOS, IGHG1, IL2RB, ITK, RUNX3, SOCS3, STAT4, TBX21, TLR4                            | 14 |
| Inflammatory Disease | airway hyperresponsiveness       | airway hyperresponsiveness of mice       | 5,02E-09 | CD86, CD1D, CXCR4, HGF, ICOS, IGHG1, IL2RB, ITK, RUNX3, SOCS3, STAT4, TBX21, TLR4                                   | 13 |
| Inflammatory Disease | inflammatory bowel disease       | inflammatory bowel disease of mammalia   | 8,05E-08 | CASP1, CCR2, CCR5, CTLA4, FAS, FCER1A, IGHM, MMP7, PIK3CD, PTGER4, STAT4, TLR4, TRA@                                | 13 |
| Inflammatory Disease | systemic lupus erythematosus     | systemic lupus erythematosus             | 8,70E-08 | C1QA, CD86, FAS, FCGR2A, HLA-DRA, ICOS, IL7R, ITGAM, LYN, PTPN22, PTPRC, SH2D1A, STAT4, TAP1, TNFSF13B              | 15 |
| Inflammatory Disease | psoriatic arthritis              | psoriatic arthritis                      | 1,66E-07 | APAF1, CXCL9, HLA-E, IGHG1, IGHM, IGKC, ITGAL, LYN, MAP4K1, PRKCB, RUNX3, TNFRSF1B                                  | 12 |
| Inflammatory Disease | lupus nephritis                  | lupus nephritis of mice                  | 5,39E-07 | CD1D, CTLA4, FAS, ICOS, LYN, PTPRC                                                                                  | 6  |
| Inflammatory Disease | ulcerative colitis               | ulcerative colitis                       | 7,80E-07 | CD86, CD247, CD3D, CD3E, CD3G, FAS, PTGER4, RUNX3, SOCS3, TLR4                                                      | 10 |
| Inflammatory Disease | contact dermatitis               | contact dermatitis                       | 1,00E-06 | CD1D, FCER1G, IGHM, IGKC, ITGB2, LCP2, PIK3CD, TLR4                                                                 | 8  |

|                       |                        |                                    |          |                                                                                                                                                                                                                                                                                                                                                                                                                                                                                                                                                                                                                                                                                                                                                                                                                                                                                                                                                                                                                                                                                                                                                                                                                                            |     |
|-----------------------|------------------------|------------------------------------|----------|--------------------------------------------------------------------------------------------------------------------------------------------------------------------------------------------------------------------------------------------------------------------------------------------------------------------------------------------------------------------------------------------------------------------------------------------------------------------------------------------------------------------------------------------------------------------------------------------------------------------------------------------------------------------------------------------------------------------------------------------------------------------------------------------------------------------------------------------------------------------------------------------------------------------------------------------------------------------------------------------------------------------------------------------------------------------------------------------------------------------------------------------------------------------------------------------------------------------------------------------|-----|
| Immunological Disease | immunological disorder | immunological disorder of mammalia | 5,34E-33 | AHR, AOA, BTK, C1QA, C3AR1, CASP1, CCL2, CCL4, CCL5, CCR2, CCR5, CCR6, CD28, CD47, CD86, CD1D, CD3E, CFH, CIITA, CTLA4, CX3CR1, CXCL9, CYBB, DSG1, ETS1, FAS, FCER1G, FCGR1A, FCGR2A, HLA-DQA1, HLA-DQB1, HLA-DRA, ICOS, IDO1, IGHG1, IGHM, IGKC, IL2RG, IL7R, IRF1, IRF4, IRF8, ITGAL, ITGB2, JAK3, LCP2, LYN, NCF2, PIK3CD, PRF1, PTGER4, RUNX1, RUNX3, SH2D1A, SOCS3, STAT1, STAT4, TAP1, TBX21, TLR4, TLR7, TYROBP, VAV1                                                                                                                                                                                                                                                                                                                                                                                                                                                                                                                                                                                                                                                                                                                                                                                                               | 63  |
| Immunological Disease | immunological disorder | immunological disorder of mice     | 1,79E-32 | AHR, AOA, BTK, C1QA, C3AR1, CASP1, CCL2, CCL4, CCL5, CCR2, CCR5, CCR6, CD28, CD47, CD86, CD1D, CD3E, CFH, CIITA, CTLA4, CX3CR1, CYBB, DSG1, ETS1, FAS, FCER1G, FCGR1A, FCGR2A, HLA-DQA1, HLA-DQB1, HLA-DRA, ICOS, IDO1, IGHM, IGKC, IL2RG, IL7R, IRF1, IRF4, IRF8, ITGAL, ITGB2, JAK3, LCP2, LYN, PIK3CD, PRF1, PTGER4, RUNX1, RUNX3, SH2D1A, SOCS3, STAT1, STAT4, TAP1, TBX21, TLR4, TLR7, TYROBP, VAV1                                                                                                                                                                                                                                                                                                                                                                                                                                                                                                                                                                                                                                                                                                                                                                                                                                   | 60  |
| Immunological Disease | immunological disorder | immunological disorder of rodents  | 2,03E-32 | AHR, AOA, BTK, C1QA, C3AR1, CASP1, CCL2, CCL4, CCL5, CCR2, CCR5, CCR6, CD28, CD47, CD86, CD1D, CD3E, CFH, CIITA, CTLA4, CX3CR1, CYBB, DSG1, ETS1, FAS, FCER1G, FCGR1A, FCGR2A, HLA-DQA1, HLA-DQB1, HLA-DRA, ICOS, IDO1, IGHG1, IGHM, IGKC, IL2RG, IL7R, IRF1, IRF4, IRF8, ITGAL, ITGB2, JAK3, LCP2, LYN, PIK3CD, PRF1, PTGER4, RUNX1, RUNX3, SH2D1A, SOCS3, STAT1, STAT4, TAP1, TBX21, TLR4, TLR7, TYROBP, VAV1                                                                                                                                                                                                                                                                                                                                                                                                                                                                                                                                                                                                                                                                                                                                                                                                                            | 61  |
| Immunological Disease | immunological disorder | immunological disorder             | 4,82E-27 | AHR, AIF1, AMICA1, AOA, APAF1, APOBEC3G, BTK, C12ORF35, C1QA, C3AR1, CARD8, CASP1, CCL2, CCL4, CCL5, CCL19, CCL21, CCR2, CCR5, CCR6, CD2, CD28, CD47, CD52, CD53, CD69, CD86, CD247, CD1D, CD3D, CD3E, CD3G, CD8A, CDC7, CELF2, CFH, CHEK2, CIITA, CLEC2D (includes EG:29121), CSF1R, CSF2RB, CSMD2, CTLA4, CTSS, CUX2, CX3CR1, CXCL6, CXCL9, CXCR4, CYBB, DCK, DSG1, ETS1, FAM49B, FAS, FCER1A, FCER1G, FCGR1A, FCGR2A, FCN1, FCRL3, FLI1, GABBR1, GABRP, GBP2, GIMAP2, GNA13, GPSM3, GZMA, GZMB, HCK, HCLS1, HGF, HLA-DMB, HLA-DOA, HLA-DPA1, HLA-DPB1, HLA-DQA1, HLA-DQB1, HLA-DRA, HLA-E, HLA-F, ICOS, IDO1, IFITM1, IGHG1, IGHM, IGKC, IGL@, IKZF1, IL10RA, IL10RB, IL12RB1, IL2RB, IL2RG, IL7R, IRF1, IRF4, IRF8, ITGAL, ITGAM, ITGB2, ITGB6, ITK, JAK3, JAKMIP1, KLRB1, LCK, LCP1, LCP2, LST1, LTF, LY75, LYN, LYZ, MAP3K1, MLLT3, MS4A7, NCF2, NCF4, NFKBIZ, P2RY13, PIK3CD, PLD1, PRDM1, PRF1, PRKCB, PSMB9, PTGER4, PTPN22, PTPRC, RAB27A, RAC2, RBL1, RNF213, RRM1 (includes EG:6240), RUNX1, RUNX3, SERPINA3, SFMBT2, SH2D1A, SIRPG, SOCS3, SP140, STAT1, STAT4, STK10, STX11, TAGAP, TAP1, TBX21, THEMIS, TLR4, TLR7, TLR8 (includes EG:51311), TMEM156, TNFRSF17, TNFRSF1B, TNFRSF13B, TOX, TYROBP, UBE2L6, VAV1, VCAN, XCL1 | 165 |
| Immunological Disease | immunological disorder | immunological disorder of humans   | 1,83E-08 | CASP1, CCR5, CTLA4, CYBB, FAS, HLA-DQB1, ICOS, JAK3, NCF2, TLR4                                                                                                                                                                                                                                                                                                                                                                                                                                                                                                                                                                                                                                                                                                                                                                                                                                                                                                                                                                                                                                                                                                                                                                            | 10  |
| Immunological Disease | immunological disorder | immunological disorder of organ    | 1,78E-06 | CD86, FCER1A, FCER1G, ICOS, ITK, LCP2, NFKBIZ, PIK3CD, TLR4                                                                                                                                                                                                                                                                                                                                                                                                                                                                                                                                                                                                                                                                                                                                                                                                                                                                                                                                                                                                                                                                                                                                                                                | 9   |
| Immunological Disease | autoimmune disease     | autoimmune disease of mice         | 7,72E-23 | BTK, C1QA, C3AR1, CASP1, CCL2, CCL5, CCR2, CCR5, CCR6, CD28, CD47, CD86, CD1D, CFH, CIITA, CTLA4, CX3CR1, DSG1, FAS, FCGR1A, FCGR2A, HLA-DQA1, HLA-DQB1, HLA-DRA, ICOS, IDO1, IL7R, IRF4, ITGAL, JAK3, LYN, PTGER4, RUNX1, SH2D1A, STAT1, STAT4, TAP1, TBX21, TLR4, TYROBP                                                                                                                                                                                                                                                                                                                                                                                                                                                                                                                                                                                                                                                                                                                                                                                                                                                                                                                                                                 | 40  |
| Immunological Disease | autoimmune disease     | autoimmune disease of rodents      | 9,97E-23 | BTK, C1QA, C3AR1, CASP1, CCL2, CCL5, CCR2, CCR5, CCR6, CD28, CD47, CD86, CD1D, CFH, CIITA, CTLA4, CX3CR1, DSG1, FAS, FCGR1A, FCGR2A, HLA-DQA1, HLA-DQB1, HLA-DRA, ICOS, IDO1, IGHG1, IL7R, IRF4, ITGAL, JAK3, LYN, PTGER4, RUNX1, SH2D1A, STAT1, STAT4, TAP1, TBX21, TLR4, TYROBP                                                                                                                                                                                                                                                                                                                                                                                                                                                                                                                                                                                                                                                                                                                                                                                                                                                                                                                                                          | 41  |
| Immunological Disease | autoimmune disease     | autoimmune disease                 | 2,40E-17 | AIF1, AMICA1, APAF1, BTK, C12ORF35, C1QA, C3AR1, CARD8, CASP1, CCL2, CCL4, CCL5, CCL19, CCL21, CCR2, CCR5, CCR6, CD2, CD28, CD47, CD53, CD69, CD86, CD1D, CD3D, CDC7, CELF2, CFH, CHEK2, CIITA, CLEC2D (includes EG:29121), CSF2RB, CSMD2, CTLA4, CUX2, CX3CR1, CXCL6, CXCL9, CXCR4, DSG1, ETS1, FAS, FCGR1A, FCGR2A, FCN1, FCRL3, FLI1, GABBR1, GABRP, GBP2, GIMAP2, GNA13, GPSM3, GZMA, GZMB, HCK, HCLS1, HLA-DMB, HLA-DOA, HLA-DPA1, HLA-DPB1, HLA-DQA1, HLA-DQB1, HLA-DRA, HLA-E, HLA-F, ICOS, IDO1, IFITM1, IGHG1, IGHM,                                                                                                                                                                                                                                                                                                                                                                                                                                                                                                                                                                                                                                                                                                              | 131 |

|                           |                                           |                                                      |          |                                                                                                                                                                                                                                                                                                                                                                                                                                                                                                                                                                                                                                                             |    |
|---------------------------|-------------------------------------------|------------------------------------------------------|----------|-------------------------------------------------------------------------------------------------------------------------------------------------------------------------------------------------------------------------------------------------------------------------------------------------------------------------------------------------------------------------------------------------------------------------------------------------------------------------------------------------------------------------------------------------------------------------------------------------------------------------------------------------------------|----|
| Immunologic<br>al Disease | immunodeficiency                          | immunodeficiency                                     | 5,41E-13 | IGL@, IKZF1, IL10RA, IL10RB, IL2RB, IL7R, IRF1, IRF4, ITGAL, ITGAM, ITGB2, JAK3, JAKMIP1, KLRB1, LCP1, LST1, LTF, LY75, LYN, LYZ, MAP3K1, MLLT3, MS4A7, NCF4, P2RY13, PLD1, PRDM1, PRKCB, PSMB9, PTGER4, PTPN22, PTPRC, RBL1, RNF213, RUNX1, SERPINA3, SFMBT2, SH2D1A, SIRPG, SOCS3, SP140, STAT1, STAT4, STK10, TAGAP, TAP1, TBX21, THEMIS, TLR4, TLR7, TLR8 (includes EG:51311), TMEM156, TNFRSF17, TNFRSF1B, TNFSF13B, TOX, TYROBP, UBE2L6, VCAN, XCL1                                                                                                                                                                                                   | 16 |
| Immunologic<br>al Disease | graft-vs-host disease                     | graft-vs-host disease                                | 1,93E-12 | CCR5, CD2, CD52, CD247, CD3D, CD3E, CD3G, CSF2RB, FAS, ICOS, IL2RB, IL2RG, PRF1, RRM1 (includes EG:6240)                                                                                                                                                                                                                                                                                                                                                                                                                                                                                                                                                    | 14 |
| Immunologic<br>al Disease | experimental autoimmune encephalomyelitis | experimental autoimmune encephalomyelitis of rodents | 3,18E-12 | C3AR1, CASP1, CCR2, CCR6, CD28, CD86, CD1D, CTLA4, CX3CR1, FAS, HLA-DQA1, HLA-DQB1, ICOS, IDO1, IGHG1, IRF4, ITGAL, LYN, STAT1, STAT4, TBX21, TLR4, TYROBP                                                                                                                                                                                                                                                                                                                                                                                                                                                                                                  | 23 |
| Immunologic<br>al Disease | experimental autoimmune encephalomyelitis | experimental autoimmune encephalomyelitis of mice    | 6,84E-12 | C3AR1, CASP1, CCR2, CCR6, CD28, CD86, CD1D, CTLA4, CX3CR1, FAS, HLA-DQA1, HLA-DQB1, ICOS, IDO1, IRF4, ITGAL, LYN, STAT1, STAT4, TBX21, TLR4, TYROBP                                                                                                                                                                                                                                                                                                                                                                                                                                                                                                         | 22 |
| Immunologic<br>al Disease | rheumatoid arthritis                      | rheumatoid arthritis                                 | 1,26E-11 | AIF1, C12ORF35, C1QA, C3AR1, CARD8, CCL2, CCL4, CCL5, CCL19, CCL21, CCR2, CCR5, CCR6, CD28, CD53, CD69, CD86, CD3D, CDC7, CELF2, CHEK2, CIITA, CSF2RB, CSMD2, CTLA4, CXCL6, CXCL9, CXCR4, FCGR2A, FCN1, FCRL3, FLI1, GABBR1, GABRP, GBP2, GIMAP2, GPSM3, GZMA, GZMB, HCK, HCLS1, HLA-DMB, HLA-DOA, HLA-DPA1, HLA-DPB1, HLA-DQA1, HLA-DQB1, HLA-DRA, ICOS, IGHG1, IGHM, IGL@, IKZF1, IL10RA, IL2RB, IL7R, ITGAL, ITGB2, JAKMIP1, LCP1, LST1, LTF, LY75, LYZ, MLLT3, MS4A7, NCF4, P2RY13, PLD1, PRDM1, PSMB9, PTGER4, PTPN22, PTPRC, RNF213, RUNX1, SERPINA3, SOCS3, SP140, STAT1, STAT4, STK10, TAGAP, TAP1, TLR4, TMEM156, TNFRSF1B, TNFSF13B, UBE2L6, XCL1 | 90 |
| Immunologic<br>al Disease | Sjogren's syndrome                        | Sjogren's syndrome                                   | 6,88E-11 | CCL4, CCL5, CCL19, CCL21, CCR5, CXCL6, FAS, IFITM1, IRF1, ITGAL, MAP3K1, SOCS3, STAT1, TLR4, TLR8 (includes EG:51311), TNFRSF17, TNFSF13B, XCL1                                                                                                                                                                                                                                                                                                                                                                                                                                                                                                             | 18 |
| Immunologic<br>al Disease | hypersensitive reaction                   | hypersensitive reaction                              | 3,19E-10 | CCL4, CCL5, CD2, CD86, CD1D, CXCR4, FCER1A, FCER1G, FCGR1A, FCGR2A, HLA-DQA1, HLA-DRA, IGHM, IGKC, ITGAL, ITGB2, LCP2, LYN, NFKBIZ, PIK3CD, RUNX3, SOCS3, TLR4, VAV1                                                                                                                                                                                                                                                                                                                                                                                                                                                                                        | 24 |
| Immunologic<br>al Disease | hypersensitive reaction                   | hypersensitive reaction of mice                      | 7,24E-08 | CCL4, CD1D, FCER1G, FCGR2A, IGHM, IGKC, ITGB2, LCP2, LYN, PIK3CD, RUNX3, VAV1                                                                                                                                                                                                                                                                                                                                                                                                                                                                                                                                                                               | 12 |
| Immunologic<br>al Disease | severe combined immunodeficiency          | severe combined immunodeficiency                     | 4,37E-09 | BTK, CD247, CD3D, CXCR4, IL2RG, IL7R, JAK3, PTPRC                                                                                                                                                                                                                                                                                                                                                                                                                                                                                                                                                                                                           | 8  |
| Immunologic<br>al Disease | lymphocytic leukemia                      | lymphocytic leukemia                                 | 1,10E-08 | CCL4, CD52, CD86, CD247, CD3D, CD3E, CD3G, CSF2RB, CXCR4, DCK, FAS, IKZF1, IL2RB, IL2RG, IRF4, ITGB2, LCK, PRKCB, RRM1 (includes EG:6240), RUNX1, TLR7                                                                                                                                                                                                                                                                                                                                                                                                                                                                                                      | 21 |
| Immunologic<br>al Disease | autoimmune hemolytic anemia               | autoimmune hemolytic anemia of mice                  | 1,67E-08 | CD28, CD47, CTLA4, FCGR1A, FCGR2A, IL7R                                                                                                                                                                                                                                                                                                                                                                                                                                                                                                                                                                                                                     | 6  |
| Immunologic               | disease                                   | disease of                                           | 2,91E-08 | BTK, CASP1, CCL5, CCR2, CCR5, CD86, CXCR4, ICOS, IRF1, ITGAM, LTF,                                                                                                                                                                                                                                                                                                                                                                                                                                                                                                                                                                                          | 12 |

|                        |                              |                                      |          |                                                                                                                                                                                                                                                                                                                                                                                                                                                                                                                                                                                                                                                                             |     |
|------------------------|------------------------------|--------------------------------------|----------|-----------------------------------------------------------------------------------------------------------------------------------------------------------------------------------------------------------------------------------------------------------------------------------------------------------------------------------------------------------------------------------------------------------------------------------------------------------------------------------------------------------------------------------------------------------------------------------------------------------------------------------------------------------------------------|-----|
| al Disease             |                              | leukocytes                           |          | RBL1                                                                                                                                                                                                                                                                                                                                                                                                                                                                                                                                                                                                                                                                        |     |
| Immunologic al Disease | systemic lupus erythematosus | systemic lupus erythematosus         | 8,70E-08 | C1QA, CD86, FAS, FCGR2A, HLA-DRA, ICOS, IL7R, ITGAM, LYN, PTPN22, PTPRC, SH2D1A, STAT4, TAP1, TNFSF13B                                                                                                                                                                                                                                                                                                                                                                                                                                                                                                                                                                      | 15  |
| Immunologic al Disease | eosinophilia                 | eosinophilia                         | 3,44E-07 | CD86, CD247, CD3G, CTSS, CXCL9, CXCR4, FCER1A, HGF, IL2RG, IRF8, ITGB6, ITK, LCK, LY75, PRF1                                                                                                                                                                                                                                                                                                                                                                                                                                                                                                                                                                                | 15  |
| Immunologic al Disease | acute lymphocytic leukemia   | acute lymphocytic leukemia           | 8,90E-07 | CD52, CD86, CD247, CD3D, CD3E, CD3G, CSF2RB, CXCR4, FAS, IKZF1, LCK, RRM1 (includes EG:6240), RUNX1                                                                                                                                                                                                                                                                                                                                                                                                                                                                                                                                                                         | 13  |
| Immunologic al Disease | contact dermatitis           | contact dermatitis                   | 1,00E-06 | CD1D, FCER1G, IGHM, IGKC, ITGB2, LCP2, PIK3CD, TLR4                                                                                                                                                                                                                                                                                                                                                                                                                                                                                                                                                                                                                         | 8   |
| Immunologic al Disease | leukopenia                   | leukopenia                           | 1,24E-06 | ETS1, ICOS, IL7R, JAK3, PIK3CD, TLR4, TLR7                                                                                                                                                                                                                                                                                                                                                                                                                                                                                                                                                                                                                                  | 7   |
| Cell Death             | cell death                   | cell death of leukocytes             | 2,36E-30 | APAF1, BCL2A1, BIRC3, BTK, C1QA, CASP1, CCL4, CCL5, CCL19, CCR5, CD2, CD28, CD47, CD69, CD247, CD3E, CHEK2, CIITA, CLEC10A, CTLA4, CXCR4, EOMES, FAS, FCER1A, FCER1G, GIMAP5, GZMA, GZMB, HIF1A, ICOS, IDO1, IGHM, IL2RG, IL7R, IRF1, IRF8, ITGAL, ITGAM, ITGB2, ITK, JAK3, KLRD1, LCK, LTF, LYN, MAP4K1, PIK3CD, POU2AF1, PRDM1, PRF1, PRKCB, PTGER4, PTPRC, RAC2, SH2D2A, STAT1, TBX21, TLR4, TNFRSF17, TNFRSF1B, TNFSF13B, XCL1                                                                                                                                                                                                                                          | 62  |
| Cell Death             | cell death                   | cell death of blood cells            | 1,35E-29 | APAF1, BCL2A1, BIRC3, BTK, C1QA, CASP1, CCL4, CCL5, CCL19, CCR5, CD2, CD28, CD47, CD69, CD247, CD3E, CHEK2, CIITA, CLEC10A, CTLA4, CXCR4, EOMES, FAS, FCER1A, FCER1G, FLI1, GIMAP5, GZMA, GZMB, HIF1A, ICOS, IDO1, IGHM, IL2RG, IL7R, IRF1, IRF8, ITGAL, ITGAM, ITGB2, ITK, JAK3, KLRD1, LCK, LTF, LYN, MAP4K1, PIK3CD, POU2AF1, PRDM1, PRF1, PRKCB, PTGER4, PTPRC, RAC2, SH2D2A, STAT1, TBX21, TLR4, TNFRSF17, TNFRSF1B, TNFSF13B, XCL1                                                                                                                                                                                                                                    | 63  |
| Cell Death             | cell death                   | cell death of mononuclear leukocytes | 9,72E-25 | APAF1, BCL2A1, BTK, CASP1, CCL4, CCL5, CCL19, CCR5, CD2, CD28, CD47, CD247, CD3E, CHEK2, CIITA, CLEC10A, CTLA4, CXCR4, EOMES, FAS, FCER1A, GIMAP5, GZMA, GZMB, ICOS, IDO1, IGHM, IL2RG, IL7R, ITGAL, ITK, JAK3, KLRD1, LCK, MAP4K1, PIK3CD, POU2AF1, PRDM1, PRF1, PRKCB, PTPRC, RAC2, SH2D2A, STAT1, TBX21, TNFRSF17, TNFRSF1B, TNFSF13B, XCL1                                                                                                                                                                                                                                                                                                                              | 49  |
| Cell Death             | cell death                   | cell death of lymphocytes            | 2,90E-24 | APAF1, BCL2A1, BTK, CASP1, CCL4, CCL5, CCL19, CCR5, CD2, CD28, CD47, CD247, CD3E, CHEK2, CIITA, CLEC10A, CTLA4, CXCR4, EOMES, FAS, GIMAP5, GZMA, GZMB, ICOS, IDO1, IGHM, IL2RG, IL7R, ITGAL, ITK, JAK3, KLRD1, LCK, MAP4K1, PIK3CD, POU2AF1, PRDM1, PRF1, PRKCB, PTPRC, RAC2, SH2D2A, STAT1, TBX21, TNFRSF17, TNFRSF1B, TNFSF13B, XCL1                                                                                                                                                                                                                                                                                                                                      | 48  |
| Cell Death             | cell death                   | cell death of T lymphocytes          | 5,52E-23 | APAF1, BCL2A1, CASP1, CCL4, CCL5, CCL19, CCR5, CD2, CD28, CD47, CD247, CD3E, CHEK2, CIITA, CLEC10A, CTLA4, CXCR4, EOMES, FAS, GIMAP5, GZMA, GZMB, ICOS, IDO1, IGHM, IL2RG, IL7R, ITK, JAK3, KLRD1, LCK, MAP4K1, PIK3CD, PRDM1, PRF1, PTPRC, RAC2, SH2D2A, STAT1, TBX21, TNFRSF1B, XCL1                                                                                                                                                                                                                                                                                                                                                                                      | 42  |
| Cell Death             | cell death                   | cell death of normal cells           | 7,42E-21 | AHR, APAF1, APOL1, BCL2A1, BIRC3, BTK, C1QA, CASP1, CCL4, CCL5, CCL19, CCR2, CCR5, CD2, CD28, CD47, CD69, CD247, CD1D, CD3E, CDC7, CFH, CHEK2, CIITA, CLEC10A, CSF1R, CTLA4, CTSS, CXCR4, CYBB, EOMES, ETS1, FAS, FCER1A, FCER1G, FCGR1A, FLI1, GABBR1, GIMAP5, GZMA, GZMB, HDAC9 (includes EG:9734), HGF, HIF1A, ICOS, IDO1, IGHG1, IGHM, IL2RG, IL7R, IRF1, IRF8, ITGAL, ITGAM, ITGB2, ITK, JAK3, KLRD1, LCK, LTF, LYN, MAP3K1, MAP4K1, MMP7, NCF2, NLRP3, PIK3CD, PLD1, POU2AF1, PRDM1, PRF1, PRKCB, PTGER4, PTGES, PTPRC, RAC2, RASSF5, RBL1, RUNX1, RUNX2, RUNX3, SERPINA3, SH2D2A, SOCS3, STAT1, STK4, TBX21, TLR4, TNFAIP8, TNFRSF17, TNFRSF1B, TNFSF13B, XAF1, XCL1 | 94  |
| Cell Death             | cell death                   | cell death of eukaryotic cells       | 7,25E-19 | AHR, APAF1, APOL1, BCL2A1, BIRC3, BTK, C1QA, CARD8, CASP1, CCL2, CCL4, CCL5, CCL19, CCND2, CCR2, CCR5, CD2, CD28, CD47, CD48, CD69, CD247, CD1D, CD3E, CD8A, CDC7, CFH, CHEK2, CIITA, CLEC10A, CSF1R, CSF2RB, CSTA, CTLA4, CTSS, CXCR4, CYBB, DSG1, EOMES, ETS1, FAS, FCER1A, FCER1G, FCGR1A, FHL2, FLI1, GABBR1, GIMAP5, GLIPR1, GPR65, GZMA, GZMB, GZMH, GZMK, HCK, HCLS1, HDAC9 (includes EG:9734), HGF, HIF1A, ICOS, IDO1, IFI16, IGHG1, IGHM, IL2RG, IL7R, IRF1, IRF4,                                                                                                                                                                                                 | 126 |

|            |              |                                    |          |                                                                                                                                                                                                                                                                                                                                                                                                                                                                                                                                                                                                                                                                                                                                                                                                                                                                                                                                                                                                                   |     |
|------------|--------------|------------------------------------|----------|-------------------------------------------------------------------------------------------------------------------------------------------------------------------------------------------------------------------------------------------------------------------------------------------------------------------------------------------------------------------------------------------------------------------------------------------------------------------------------------------------------------------------------------------------------------------------------------------------------------------------------------------------------------------------------------------------------------------------------------------------------------------------------------------------------------------------------------------------------------------------------------------------------------------------------------------------------------------------------------------------------------------|-----|
|            |              |                                    |          | IRF8, ITGAL, ITGAM, ITGB2, ITK, JAK3, KLRD1, LCK, LEF1, LTF, LYN, MAP3K1, MAP4K1, MLLT3, MMP7, NCF2, NFKBIZ, NLRP3, PIK3CD, PLAC8, PLD1, PLSCR1, POU2AF1, PRDM1, PRF1, PRKCB, PTGER4, PTGES, PTPN22, PTPRC, PTPRE, RAC2, RASSF5, RBL1, RGS10, RTN1, RUNX1, RUNX2, RUNX3, SERPINA3, SERPINB9, SH2D2A, SOCS3, STAT1, STK4, TBX21, TLR4, TMEM123, TNFAIP8, TNFRSF17, TNFRSF1B, TNFSF13B, TRA@, TTF1, VAV1, VCAN, XAF1, XCL1                                                                                                                                                                                                                                                                                                                                                                                                                                                                                                                                                                                          |     |
| Cell Death | cell death   | cell death                         | 7,32E-19 | AHR, AIF1, APAF1, APOL1, BCL11B, BCL2A1, BIRC3, BTK, C1QA, CARD8, CASP1, CCL2, CCL4, CCL5, CCL19, CCND2, CCR2, CCR5, CD2, CD28, CD47, CD48, CD53, CD69, CD247, CD1D, CD3E, CD3G, CD8A, CDC7, CFH, CHEK2, CIITA, CLEC10A, CSF1R, CSF2RB, CSTA, CTLA4, CTSS, CX3CR1, CXCR4, CYBB, DSG1, EOMES, ETS1, FAS, FCER1A, FCER1G, FCGR1A, FHL2, FLI1, GABBR1, GABRP, GIMAP5, GLIPR1, GNA13, GPR65, GZMA, GZMB, GZMH, GZMK, HCK, HCLS1, HDAC9 (includes EG:9734), HGF, HIF1A, ICOS, IDO1, IFI16, IGHG1, IGHM, IL2RG, IL7R, IRF1, IRF4, IRF8, ITGAL, ITGAM, ITGB2, ITGB6, ITK, JAK3, KLRD1, LCK, LEF1, LTF, LY86, LYN, LYZ, MAP3K1, MAP4K1, MLLT3, MMP7, NCF2, NFKBIZ, NLRP3, PIK3CD, PLAC8, PLD1, PLSCR1, POU2AF1, PRDM1, PRF1, PRKCB, PTGER4, PTGES, PTPN22, PTPRC, PTPRE, RAC2, RASSF5, RBL1, RGS10, RTN1, RUNX1, RUNX2, RUNX3, SERPINA3, SERPINB9, SH2D2A, SLC2A3, SOCS3, SRGN, ST8SIA4, STAT1, STAT4, STK4, TBX21, TLR4, TMEM123, TNC, TNFAIP8, TNFRSF17, TNFRSF1B, TNFSF13B, TRA@, TTF1, TYROBP, VAV1, VCAN, XAF1, XCL1 | 142 |
| Cell Death | cell death   | cell death of tumor cell lines     | 2,01E-13 | AHR, APAF1, APOL1, BCL2A1, BIRC3, BTK, CARD8, CASP1, CCL2, CD28, CD47, CD48, CDC7, CFH, CHEK2, CSF1R, CSF2RB, CSTA, DSG1, ETS1, FAS, FCER1A, FLI1, GIMAP5, GLIPR1, GPR65, GZMB, GZMH, GZMK, HCK, HCLS1, HGF, HIF1A, IDO1, IFI16, IGHG1, IGHM, IL2RG, IRF1, IRF4, IRF8, ITGAM, JAK3, LCK, LEF1, LYN, MAP3K1, MAP4K1, MLLT3, MMP7, NFKBIZ, NLRP3, PRDM1, PRF1, PRKCB, PTPN22, PTPRC, PTPRE, RASSF5, RTN1, RUNX1, RUNX3, SOCS3, STAT1, STK4, TLR4, TMEM123, TNFAIP8, TNFRSF1B, TNFSF13B, TRA@, TTF1, VAV1, VCAN, XAF1                                                                                                                                                                                                                                                                                                                                                                                                                                                                                                | 75  |
| Cell Death | cell death   | cell death of cell lines           | 1,50E-12 | AHR, APAF1, APOL1, BCL2A1, BIRC3, BTK, CARD8, CASP1, CCL2, CCL5, CCND2, CCR5, CD2, CD28, CD47, CD48, CD3E, CD8A, CDC7, CFH, CHEK2, CSF1R, CSF2RB, CSTA, CTLA4, DSG1, ETS1, FAS, FCER1A, FHL2, FLI1, GIMAP5, GLIPR1, GPR65, GZMB, GZMH, GZMK, HCK, HCLS1, HGF, HIF1A, IDO1, IFI16, IGHG1, IGHM, IL2RG, IRF1, IRF4, IRF8, ITGAM, JAK3, LCK, LEF1, LYN, MAP3K1, MAP4K1, MLLT3, MMP7, NFKBIZ, NLRP3, PLAC8, PLD1, PLSCR1, PRDM1, PRF1, PRKCB, PTPN22, PTPRC, PTPRE, RASSF5, RBL1, RGS10, RTN1, RUNX1, RUNX3, SOCS3, STAT1, STK4, TLR4, TMEM123, TNFAIP8, TNFRSF1B, TNFSF13B, TRA@, TTF1, VAV1, VCAN, XAF1                                                                                                                                                                                                                                                                                                                                                                                                             | 88  |
| Cell Death | cell death   | cell death of leukemia cell lines  | 3,73E-12 | APAF1, BCL2A1, CARD8, CD28, CD47, CSF2RB, FAS, FCER1A, GIMAP5, GZMB, GZMH, GZMK, HCLS1, HGF, IL2RG, ITGAM, LCK, LYN, MLLT3, NLRP3, PRF1, PRKCB, PTPRC, PTPRE, RASSF5, RUNX1, STK4, TMEM123, VAV1                                                                                                                                                                                                                                                                                                                                                                                                                                                                                                                                                                                                                                                                                                                                                                                                                  | 29  |
| Cell Death | cell death   | cell death of lymphoma cell lines  | 1,36E-10 | BCL2A1, BIRC3, BTK, CARD8, CD48, CHEK2, FAS, FCER1A, GPR65, GZMH, IDO1, IGHM, IRF8, JAK3, LEF1, MAP4K1, PRDM1, PRKCB, PTPN22, PTPRC, RUNX1, TNFSF13B                                                                                                                                                                                                                                                                                                                                                                                                                                                                                                                                                                                                                                                                                                                                                                                                                                                              | 22  |
| Cell Death | cell death   | cell death of natural killer cells | 8,80E-07 | CD2, EOMES, FAS, ITGAL, KLRD1, TBX21                                                                                                                                                                                                                                                                                                                                                                                                                                                                                                                                                                                                                                                                                                                                                                                                                                                                                                                                                                              | 6   |
| Cell Death | cytotoxicity | cytotoxicity of cells              | 9,20E-30 | CASP1, CCL2, CCL5, CD2, CD28, CD48, CD69, CD96, CD244, CD1D, CD300A, CYBB, FAS, FCER1G, FCGR1A, FCGR2A, FCGR3B, GIMAP5, GZMA, GZMB, HCK, HCST, IGHG1, ITGAL, ITGAM, ITGB2, ITK, KLRD1, KLRK1, LCK, LYN, PRF1, PTGDR, PTPRC, RAB27A, SH2D1A, SLAMF6, SLAMF7, STAT1, STAT4, TAP1, TBX21, TNFRSF1B, TYROBP, VAV1                                                                                                                                                                                                                                                                                                                                                                                                                                                                                                                                                                                                                                                                                                     | 45  |
| Cell Death | cytotoxicity | cytotoxicity of leukocytes         | 1,27E-26 | CASP1, CCL2, CCL5, CD2, CD48, CD69, CD96, CD244, CD1D, CD300A, CYBB, FAS, FCGR1A, FCGR2A, FCGR3B, GZMA, GZMB, HCK, ITGAL, ITGAM, ITGB2, ITK, KLRD1, KLRK1, LCK, LYN, PRF1, PTGDR, PTPRC, RAB27A, SLAMF6, STAT1, STAT4, TBX21, TYROBP, VAV1                                                                                                                                                                                                                                                                                                                                                                                                                                                                                                                                                                                                                                                                                                                                                                        | 36  |
| Cell Death | cytotoxicity | cytotoxicity of eukaryotic cells   | 1,22E-24 | CASP1, CCL2, CCL5, CD2, CD28, CD48, CD69, CD96, CD244, CD1D, CD300A, CYBB, FAS, FCGR1A, FCGR2A, FCGR3B, GZMA, GZMB, HCK, IGHG1, ITGAL, ITGAM, ITGB2, ITK, KLRD1, KLRK1, LCK, LYN, PRF1, PTGDR, PTPRC, RAB27A, SLAMF6, STAT1, STAT4, TBX21, TYROBP, VAV1                                                                                                                                                                                                                                                                                                                                                                                                                                                                                                                                                                                                                                                                                                                                                           | 38  |
| Cell Death | cytotoxicity | cytotoxicity of                    | 5,58E-22 | CCL2, CCL5, CD2, CD48, CD69, CD96, CD244, CD1D, CD300A, FAS,                                                                                                                                                                                                                                                                                                                                                                                                                                                                                                                                                                                                                                                                                                                                                                                                                                                                                                                                                      | 31  |

|            |              |                                      |          |                                                                                                                                                                                                                                                                                                                                                                                                                                                                                                                                                                                                                                                                                                                                                                                                                     |     |
|------------|--------------|--------------------------------------|----------|---------------------------------------------------------------------------------------------------------------------------------------------------------------------------------------------------------------------------------------------------------------------------------------------------------------------------------------------------------------------------------------------------------------------------------------------------------------------------------------------------------------------------------------------------------------------------------------------------------------------------------------------------------------------------------------------------------------------------------------------------------------------------------------------------------------------|-----|
|            | icity        | lymphocytes                          |          | FCGR1A, FCGR2A, FCGR3B, GZMA, GZMB, ITGAL, ITGB2, ITK, KLRD1, KLRK1, LCK, PRF1, PTGDR, PTPRC, RAB27A, SLAMF6, STAT1, STAT4, TBX21, TYROBP, VAV1                                                                                                                                                                                                                                                                                                                                                                                                                                                                                                                                                                                                                                                                     |     |
| Cell Death | cytotoxicity | cytotoxicity of natural killer cells | 3,82E-20 | CCL2, CD2, CD48, CD69, CD96, CD244, CD300A, FAS, FCGR1A, FCGR2A, FCGR3B, ITGAL, ITGB2, ITK, KLRD1, KLRK1, LCK, PRF1, PTGDR, SLAMF6, STAT1, STAT4, TBX21, TYROBP, VAV1                                                                                                                                                                                                                                                                                                                                                                                                                                                                                                                                                                                                                                               | 25  |
| Cell Death | cytotoxicity | cytotoxicity of T lymphocytes        | 1,80E-06 | CCL5, CD1D, GZMA, GZMB, KLRD1, KLRK1, PRF1, PTPRC, RAB27A, STAT4                                                                                                                                                                                                                                                                                                                                                                                                                                                                                                                                                                                                                                                                                                                                                    | 10  |
| Cell Death | apoptosis    | apoptosis of leukocytes              | 1,92E-24 | BCL2A1, BIRC3, BTK, C1QA, CASP1, CCL4, CCL5, CCR5, CD2, CD28, CD47, CD69, CD247, CD3E, CHEK2, CIITA, CTLA4, CXCR4, FAS, FCER1A, FCER1G, GIMAP5, GZMA, GZMB, HIF1A, ICOS, IGHM, IL2RG, IL7R, IRF1, IRF8, ITGAM, ITGB2, ITK, JAK3, LCK, LTF, LYN, MAP4K1, PIK3CD, POU2AF1, PRF1, PRKCB, PTGER4, PTPRC, RAC2, STAT1, TLR4, TNFRSF17, TNFRSF1B, TNFSF13B, XCL1                                                                                                                                                                                                                                                                                                                                                                                                                                                          | 52  |
| Cell Death | apoptosis    | apoptosis of blood cells             | 6,53E-24 | BCL2A1, BIRC3, BTK, C1QA, CASP1, CCL4, CCL5, CCR5, CD2, CD28, CD47, CD69, CD247, CD3E, CHEK2, CIITA, CTLA4, CXCR4, FAS, FCER1A, FCER1G, FLI1, GIMAP5, GZMA, GZMB, HIF1A, ICOS, IGHM, IL2RG, IL7R, IRF1, IRF8, ITGAM, ITGB2, ITK, JAK3, LCK, LTF, LYN, MAP4K1, PIK3CD, POU2AF1, PRF1, PRKCB, PTGER4, PTPRC, RAC2, STAT1, TLR4, TNFRSF17, TNFRSF1B, TNFSF13B, XCL1                                                                                                                                                                                                                                                                                                                                                                                                                                                    | 53  |
| Cell Death | apoptosis    | apoptosis of mononuclear leukocytes  | 1,61E-18 | BCL2A1, BTK, CASP1, CCL4, CCL5, CCR5, CD2, CD28, CD47, CD247, CD3E, CHEK2, CIITA, CTLA4, CXCR4, FAS, FCER1A, GIMAP5, GZMA, GZMB, ICOS, IGHM, IL2RG, IL7R, ITK, JAK3, LCK, MAP4K1, PIK3CD, POU2AF1, PRF1, PRKCB, PTPRC, RAC2, STAT1, TNFRSF17, TNFRSF1B, TNFSF13B, XCL1                                                                                                                                                                                                                                                                                                                                                                                                                                                                                                                                              | 39  |
| Cell Death | apoptosis    | apoptosis of lymphocytes             | 4,14E-18 | BCL2A1, BTK, CASP1, CCL4, CCL5, CCR5, CD2, CD28, CD47, CD247, CD3E, CHEK2, CIITA, CTLA4, CXCR4, FAS, GIMAP5, GZMA, GZMB, ICOS, IGHM, IL2RG, IL7R, ITK, JAK3, LCK, MAP4K1, PIK3CD, POU2AF1, PRF1, PRKCB, PTPRC, RAC2, STAT1, TNFRSF17, TNFRSF1B, TNFSF13B, XCL1                                                                                                                                                                                                                                                                                                                                                                                                                                                                                                                                                      | 38  |
| Cell Death | apoptosis    | apoptosis of normal cells            | 1,08E-17 | AHR, APAF1, BCL2A1, BIRC3, BTK, C1QA, CASP1, CCL4, CCL5, CCR2, CCR5, CD2, CD28, CD47, CD69, CD247, CD1D, CD3E, CFH, CHEK2, CIITA, CSF1R, CTLA4, CTSS, CXCR4, ETS1, FAS, FCER1A, FCER1G, FCGR1A, FLI1, GABBR1, GIMAP5, GZMA, GZMB, HGF, HIF1A, ICOS, IGHG1, IGHM, IL2RG, IL7R, IRF1, IRF8, ITGAM, ITGB2, ITK, JAK3, LCK, LTF, LYN, MAP3K1, MAP4K1, MMP7, NLRP3, PIK3CD, PLD1, POU2AF1, PRF1, PRKCB, PTGER4, PTGES, PTPRC, RAC2, RBL1, RUNX2, RUNX3, SERPINA3, SOCS3, STAT1, STK4, TLR4, TNFAIP8, TNFRSF17, TNFRSF1B, TNFSF13B, XAF1, XCL1                                                                                                                                                                                                                                                                            | 78  |
| Cell Death | apoptosis    | apoptosis of eukaryotic cells        | 2,00E-17 | AHR, APAF1, BCL2A1, BIRC3, BTK, C1QA, CARD8, CASP1, CCL4, CCL5, CCND2, CCR2, CCR5, CD2, CD28, CD47, CD48, CD69, CD247, CD1D, CD3E, CD8A, CDC7, CFH, CHEK2, CIITA, CSF1R, CSF2RB, CSTA, CTLA4, CTSS, CXCR4, DSG1, ETS1, FAS, FCER1A, FCER1G, FCGR1A, FHL2, FLI1, GABBR1, GIMAP5, GLIPR1, GPR65, GZMA, GZMB, HCK, HCLS1, HGF, HIF1A, ICOS, IDO1, IFI16, IGHG1, IGHM, IL2RG, IL7R, IRF1, IRF4, IRF8, ITGAM, ITGB2, ITK, JAK3, LCK, LEF1, LTF, LYN, MAP3K1, MAP4K1, MLLT3, MMP7, NFKB1Z, NLRP3, PIK3CD, PLAC8, PLD1, PLSCR1, POU2AF1, PRDM1, PRF1, PRKCB, PTGER4, PTGES, PTPN22, PTPRC, PTPRE, RAC2, RASSF5, RBL1, RTN1, RUNX1, RUNX2, RUNX3, SERPINA3, SOCS3, STAT1, STK4, TLR4, TNFAIP8, TNFRSF17, TNFRSF1B, TNFSF13B, TRA@, TTF1, VAV1, VCAN, XAF1, XCL1                                                             | 109 |
| Cell Death | apoptosis    | apoptosis of T lymphocytes           | 3,12E-16 | BCL2A1, CASP1, CCL4, CCL5, CCR5, CD2, CD28, CD47, CD247, CD3E, CHEK2, CIITA, CTLA4, CXCR4, FAS, GIMAP5, GZMA, GZMB, ICOS, IL2RG, IL7R, ITK, JAK3, LCK, MAP4K1, PIK3CD, PRF1, PTPRC, RAC2, STAT1, TNFRSF1B, XCL1                                                                                                                                                                                                                                                                                                                                                                                                                                                                                                                                                                                                     | 32  |
| Cell Death | apoptosis    | apoptosis                            | 4,51E-16 | AHR, APAF1, BCL11B, BCL2A1, BIRC3, BTK, C1QA, CARD8, CASP1, CCL4, CCL5, CCND2, CCR2, CCR5, CD2, CD28, CD47, CD48, CD53, CD69, CD247, CD1D, CD3E, CD3G, CD8A, CDC7, CFH, CHEK2, CIITA, CSF1R, CSF2RB, CSTA, CTLA4, CTSS, CX3CR1, CXCR4, DSG1, ETS1, FAS, FCER1A, FCER1G, FCGR1A, FHL2, FLI1, GABBR1, GIMAP5, GLIPR1, GNA13, GPR65, GZMA, GZMB, HCK, HCLS1, HGF, HIF1A, ICOS, IDO1, IFI16, IGHG1, IGHM, IL2RG, IL7R, IRF1, IRF4, IRF8, ITGAM, ITGB2, ITGB6, ITK, JAK3, LCK, LEF1, LTF, LY86, LYN, MAP3K1, MAP4K1, MLLT3, MMP7, NFKB1Z, NLRP3, PIK3CD, PLAC8, PLD1, PLSCR1, POU2AF1, PRDM1, PRF1, PRKCB, PTGER4, PTGES, PTPN22, PTPRC, PTPRE, RAC2, RASSF5, RBL1, RTN1, RUNX1, RUNX2, RUNX3, SERPINA3, SLC2A3, SOCS3, SRGN, ST8SIA4, STAT1, STAT4, STK4, TLR4, TNC, TNFAIP8, TNFRSF17, TNFRSF1B, TNFSF13B, TRA@, TTF1, | 121 |



|            |           |                                   |          |                                                                                                                                                                                                                                                                                                                                                                                                                                                                                                                                                |    |
|------------|-----------|-----------------------------------|----------|------------------------------------------------------------------------------------------------------------------------------------------------------------------------------------------------------------------------------------------------------------------------------------------------------------------------------------------------------------------------------------------------------------------------------------------------------------------------------------------------------------------------------------------------|----|
|            |           |                                   |          | VAV1, VCAN, XAF1, XCL1                                                                                                                                                                                                                                                                                                                                                                                                                                                                                                                         |    |
| Cell Death | apoptosis | apoptosis of cell lines           | 1,53E-13 | AHR, APAF1, BCL2A1, BIRC3, BTK, CARD8, CASP1, CCL5, CCND2, CCR5, CD2, CD28, CD47, CD48, CD3E, CD8A, CDC7, CFH, CHEK2, CSF1R, CSF2RB, CSTA, CTLA4, DSG1, ETS1, FAS, FCER1A, FHL2, FLI1, GIMAP5, GLIPR1, GPR65, GZMB, HCK, HCLS1, HGF, HIF1A, IDO1, IFI16, IGHM, IL2RG, IRF1, IRF4, IRF8, ITGAM, JAK3, LCK, LEF1, LYN, MAP3K1, MAP4K1, MLLT3, MMP7, NFKBIZ, PLAC8, PLD1, PLSCR1, PRDM1, PRF1, PRKCB, PTPN22, PTPRC, PTPRE, RASSF5, RBL1, RTN1, RUNX1, RUNX3, SOCS3, STAT1, STK4, TLR4, TNFAIP8, TNFRSF1B, TNFSF13B, TRA@, TTF1, VAV1, VCAN, XAF1 | 80 |
| Cell Death | apoptosis | apoptosis of tumor cell lines     | 3,36E-13 | AHR, APAF1, BCL2A1, BIRC3, BTK, CARD8, CASP1, CD28, CD47, CD48, CDC7, CFH, CHEK2, CSF1R, CSF2RB, CSTA, DSG1, ETS1, FAS, FCER1A, FLI1, GIMAP5, GLIPR1, GPR65, GZMB, HCK, HCLS1, HGF, HIF1A, IDO1, IFI16, IGHM, IL2RG, IRF1, IRF4, IRF8, ITGAM, JAK3, LCK, LYN, MAP3K1, MAP4K1, MLLT3, MMP7, NFKBIZ, PRDM1, PRF1, PRKCB, PTPN22, PTPRC, PTPRE, RASSF5, RTN1, RUNX1, RUNX3, SOCS3, STAT1, STK4, TLR4, TNFAIP8, TNFRSF1B, TNFSF13B, TRA@, TTF1, VAV1, VCAN, XAF1                                                                                   | 67 |
| Cell Death | apoptosis | apoptosis of leukemia cell lines  | 1,87E-10 | APAF1, BCL2A1, CARD8, CD28, CD47, CSF2RB, FAS, FCER1A, GIMAP5, GZMB, HCLS1, HGF, IL2RG, ITGAM, LCK, LYN, MLLT3, PRF1, PRKCB, PTPRC, PTPRE, RASSF5, RUNX1, STK4, VAV1                                                                                                                                                                                                                                                                                                                                                                           | 25 |
| Cell Death | apoptosis | apoptosis of lymphoma cell lines  | 4,70E-10 | BCL2A1, BIRC3, BTK, CARD8, CD48, CHEK2, FAS, FCER1A, GPR65, IDO1, IGHM, IRF8, JAK3, MAP4K1, PRDM1, PRKCB, PTPN22, PTPRC, RUNX1, TNFSF13B                                                                                                                                                                                                                                                                                                                                                                                                       | 20 |
| Cell Death | apoptosis | apoptosis of leukocyte cell lines | 1,08E-09 | APAF1, BCL2A1, BIRC3, CCL5, CCND2, CCR5, CD2, CD3E, CD8A, CTLA4, FAS, FCER1A, GZMB, HCLS1, HGF, IGHM, IRF4, PLAC8, PRDM1, PTPRC, RUNX1, TNFRSF1B, TRA@                                                                                                                                                                                                                                                                                                                                                                                         | 23 |
| Cell Death | apoptosis | apoptosis of B lymphocytes        | 1,54E-08 | BCL2A1, BTK, CASP1, CD47, FAS, GZMB, IGHM, PIK3CD, POU2AF1, PRF1, PRKCB, PTPRC, TNFRSF17, TNFSF13B                                                                                                                                                                                                                                                                                                                                                                                                                                             | 14 |
| Cell Death | apoptosis | apoptosis of lymphoblasts         | 8,80E-07 | CCL4, CCL5, CD3E, FAS, GZMB, PRF1                                                                                                                                                                                                                                                                                                                                                                                                                                                                                                              | 6  |
| Cell Death | apoptosis | apoptosis of phagocytes           | 1,96E-06 | BCL2A1, BIRC3, C1QA, CASP1, CCL5, CXCR4, FAS, HIF1A, IRF1, ITGB2, LTF, TLR4, TNFRSF1B                                                                                                                                                                                                                                                                                                                                                                                                                                                          | 13 |
| Cell Death | survival  | survival of leukocytes            | 9,27E-24 | BCL2A1, BTK, CCL4, CD28, CD86, CD300A, CD3E, CD8A, CHEK2, CSF1R, CSF2RB, FAS, FCER1A, FCER1G, HCK, HIF1A, ICOS, IL2RB, IL2RG, ITGB2, JAK3, LAX1, LEF1, LYN, NCF2, PIK3CD, PRKCB, PTPRC, RAC2, STAT1, STAT4, TLR4, TNFRSF17, TNFRSF1B, TNFSF13B, TRA@, TYROBP                                                                                                                                                                                                                                                                                   | 37 |
| Cell Death | survival  | survival of blood cells           | 6,29E-23 | BCL2A1, BTK, CCL4, CD28, CD86, CD300A, CD3E, CD8A, CHEK2, CSF1R, CSF2RB, FAS, FCER1A, FCER1G, HCK, HIF1A, ICOS, IL2RB, IL2RG, ITGB2, JAK3, LAX1, LEF1, LYN, NCF2, PIK3CD, PRKCB, PTPRC, RAC2, RUNX1, STAT1, STAT4, TLR4, TNFRSF17, TNFRSF1B, TNFSF13B, TRA@, TYROBP                                                                                                                                                                                                                                                                            | 38 |
| Cell Death | survival  | survival of lymphocytes           | 7,96E-15 | BTK, CD28, CD86, CD3E, CD8A, CHEK2, FAS, HCK, ICOS, IL2RB, IL2RG, JAK3, LAX1, LEF1, NCF2, PIK3CD, PRKCB, PTPRC, STAT1, STAT4, TNFRSF17, TNFRSF1B, TNFSF13B, TRA@                                                                                                                                                                                                                                                                                                                                                                               | 24 |
| Cell Death | survival  | survival of normal cells          | 1,67E-13 | BCL2A1, BTK, CCL4, CCL5, CCL21, CD28, CD86, CD300A, CD3E, CD8A, CHEK2, CSF1R, CSF2RB, CXCL9, FAS, FCER1A, FCER1G, HCK, HGF, HIF1A, ICOS, IL2RB, IL2RG, ITGB2, JAK3, LAX1, LEF1, LYN, MAP3K1, NCF2, PIK3CD, PRKCB, PTPRC, RAC2, RUNX1, STAT1, STAT4, TLR4, TNFRSF17, TNFRSF1B, TNFSF13B, TRA@, TYROBP                                                                                                                                                                                                                                           | 43 |
| Cell Death | survival  | survival of T lymphocytes         | 5,54E-11 | CD28, CD86, CD3E, CD8A, CHEK2, FAS, ICOS, IL2RB, IL2RG, JAK3, LAX1, PTPRC, STAT1, STAT4, TNFRSF1B, TRA@                                                                                                                                                                                                                                                                                                                                                                                                                                        | 16 |
| Cell Death | survival  | survival of cells                 | 1,06E-10 | APAF1, BCL2A1, BTK, CBL, CCL2, CCL4, CCL5, CCL21, CD28, CD48, CD86, CD300A, CD3E, CD8A, CHEK2, CSF1R, CSF2RB, CXCL9, CXCR4, DUSP5, FAS, FCER1A, FCER1G, FLI1, GZMB, HCK, HGF, HIF1A, ICOS, IL2RB, IL2RG, ITGB2, JAK3, LAX1, LCK, LEF1, LYN, LYZ, MAP3K1, NCF2, PIK3CD, PLAC8, PLSCR1, PRKCB, PTPN7, PTPN9, PTPN22, PTBRA, PTPRC, RAC2, RUNX1, STAT1, STAT4, TLR4, TNFRSF17, TNFRSF1B, TNFSF13B, TRA@, TYROBP                                                                                                                                   | 59 |
| Cell Death | survival  | survival of eukaryotic cells      | 5,11E-10 | APAF1, BCL2A1, BTK, CCL2, CCL4, CCL5, CCL21, CD28, CD86, CD300A, CD3E, CD8A, CHEK2, CSF1R, CSF2RB, CXCL9, DUSP5, FAS, FCER1A, FCER1G, FLI1, HCK, HGF, HIF1A, ICOS, IL2RB, IL2RG, ITGB2, JAK3, LAX1, LCK, LEF1, LYN, MAP3K1, NCF2, PIK3CD, PLAC8, PLSCR1, PRKCB, PTPN7, PTPN9, PTPN22, PTBRA, PTPRC, RAC2, RUNX1, STAT1, STAT4, TLR4, TNFRSF17, TNFRSF1B, TNFSF13B, TRA@, TYROBP                                                                                                                                                                | 54 |
| Cell Death | survival  | survival of mast cells            | 1,20E-08 | BCL2A1, BTK, CD300A, FCER1A, FCER1G, LAX1, LYN, RAC2                                                                                                                                                                                                                                                                                                                                                                                                                                                                                           | 8  |

|            |                                                     |                                                                         |          |                                                                                                                                                |    |
|------------|-----------------------------------------------------|-------------------------------------------------------------------------|----------|------------------------------------------------------------------------------------------------------------------------------------------------|----|
| Cell Death | survival                                            | survival of phagocytes                                                  | 1,93E-08 | BCL2A1, CCL4, CSF1R, CSF2RB, FAS, HIF1A, LYN, TLR4, TYROBP                                                                                     | 9  |
| Cell Death | survival                                            | survival of neutrophils                                                 | 8,80E-07 | BCL2A1, CCL4, CSF2RB, FAS, HIF1A, LYN                                                                                                          | 6  |
| Cell Death | cytolysis                                           | cytolysis                                                               | 1,31E-13 | APOL1, CD48, CD244, CD247, CX3CR1, FAS, FCER1A, FCGR1A, FCGR2A, GZMA, GZMB, IGHG1, IGKC, ITGB2, KLRD1, KLRK1, LCK, PRF1, PTPRC, TNFRSF1B, VAV1 | 21 |
| Cell Death | cytolysis                                           | cytolysis of cells                                                      | 6,79E-11 | CD48, CD244, CX3CR1, FAS, FCGR2A, GZMA, GZMB, IGHG1, ITGB2, KLRD1, KLRK1, LCK, PRF1, PTPRC, TNFRSF1B, VAV1                                     | 16 |
| Cell Death | cytolysis                                           | cytolysis of eukaryotic cells                                           | 8,95E-10 | CD48, CD244, CX3CR1, FAS, FCGR2A, GZMB, ITGB2, KLRK1, LCK, PRF1, PTPRC, TNFRSF1B, VAV1                                                         | 13 |
| Cell Death | killing                                             | killing of lymphocytes                                                  | 4,45E-13 | CD47, CD48, CD244, CD1D, CIITA, FAS, KLRK1, LY9, PRF1, SH2D1A, SLAMF6, SLAMF7, STAT1, TRA@                                                     | 14 |
| Cell Death | killing                                             | killing of cells                                                        | 3,70E-12 | CD47, CD48, CD244, CD1D, CIITA, CTLA4, CYBB, ETS1, FAS, GZMB, HIF1A, KLRK1, LTF, LY9, LYZ, PRF1, SH2D1A, SLAMF6, SLAMF7, STAT1, TRA@           | 21 |
| Cell Death | killing                                             | killing of normal cells                                                 | 2,92E-11 | CD47, CD48, CD244, CD1D, CIITA, ETS1, FAS, KLRK1, LY9, PRF1, SH2D1A, SLAMF6, SLAMF7, STAT1, TRA@                                               | 15 |
| Cell Death | killing                                             | killing of eukaryotic cells                                             | 9,54E-11 | CD47, CD48, CD244, CD1D, CIITA, CTLA4, CYBB, ETS1, FAS, KLRK1, LY9, PRF1, SH2D1A, SLAMF6, SLAMF7, STAT1, TRA@                                  | 17 |
| Cell Death | killing                                             | killing of natural killer cells                                         | 6,75E-10 | CD48, CD244, CD1D, LY9, PRF1, SH2D1A, SLAMF6, SLAMF7, STAT1                                                                                    | 9  |
| Cell Death | killing                                             | killing of hematopoietic cells                                          | 8,83E-08 | CD48, KLRK1, LY9, SH2D1A, SLAMF6, SLAMF7                                                                                                       | 6  |
| Cell Death | killing                                             | killing of T lymphocytes                                                | 1,68E-06 | CD47, CD244, CIITA, FAS, PRF1, SH2D1A, TRA@                                                                                                    | 7  |
| Cell Death | lysis                                               | lysis of cells                                                          | 3,57E-11 | CASP1, CD48, CD244, CD1D, CD8A, CX3CR1, FAS, FCGR2A, GZMA, GZMB, IGHG1, ITGB2, KLRD1, KLRK1, LCK, PRF1, PTPRC, TLR4, TNFRSF1B, VAV1            | 20 |
| Cell Death | lysis                                               | lysis of eukaryotic cells                                               | 2,28E-09 | CD48, CD244, CD1D, CX3CR1, FAS, FCGR2A, GZMB, ITGB2, KLRD1, KLRK1, LCK, PRF1, PTPRC, TLR4, TNFRSF1B, VAV1                                      | 16 |
| Cell Death | lysis                                               | lysis of cell lines                                                     | 1,47E-06 | CD48, CD244, CX3CR1, FAS, ITGB2, KLRD1, KLRK1, PRF1, TLR4                                                                                      | 9  |
| Cell Death | antibody-dependent cell-mediated cytotoxic reaction | antibody-dependent cell-mediated cytotoxic reaction                     | 5,78E-10 | CD247, FCER1A, FCGR1A, FCGR2A, IGHG1, IGKC, VAV1                                                                                               | 7  |
| Cell Death | antibody-dependent cell-mediated cytotoxic reaction | antibody-dependent cell-mediated cytotoxic reaction of eukaryotic cells | 1,76E-07 | CD247, FCER1A, FCGR2A, IGKC, VAV1                                                                                                              | 5  |
| Cell Death | activation-induced cell death                       | activation-induced cell death                                           | 8,95E-10 | CCR5, CD28, CD3E, CIITA, CTLA4, FAS, IRF4, ITK, MAP4K1, PRF1, RAC2, STAT1, TNFRSF1B                                                            | 13 |
| Cell Death | activation-induced cell death                       | activation-induced cell death                                           | 9,83E-10 | CCR5, CD28, CD3E, CIITA, CTLA4, FAS, ITK, MAP4K1, PRF1, RAC2, STAT1, TNFRSF1B                                                                  | 12 |

|                   |                               |                                                |          |                                                                                                                                                                                                                                                                                                                                                                                                                                                                                                                                                                                                                                |    |
|-------------------|-------------------------------|------------------------------------------------|----------|--------------------------------------------------------------------------------------------------------------------------------------------------------------------------------------------------------------------------------------------------------------------------------------------------------------------------------------------------------------------------------------------------------------------------------------------------------------------------------------------------------------------------------------------------------------------------------------------------------------------------------|----|
| Cell Death        | induced cell death            | death of eukaryotic cells                      | 1,39E-09 | CCR5, CD28, CD3E, CIITA, FAS, ITK, MAP4K1, PRF1, RAC2, STAT1                                                                                                                                                                                                                                                                                                                                                                                                                                                                                                                                                                   | 10 |
| Cell Death        | activation-induced cell death | activation-induced cell death of T lymphocytes | 4,51E-07 | AHR, CCR2, CFH, FAS, ITGB2, SOCS3, TLR4, TNFRSF1B                                                                                                                                                                                                                                                                                                                                                                                                                                                                                                                                                                              | 8  |
| Cell Death        | necrosis                      | necrosis of liver cells                        | 7,18E-07 | AHR, BCL2A1, CASP1, CCR2, CFH, FAS, HGF, ITGB2, PRKCB, SOCS3, TLR4, TNFRSF1B                                                                                                                                                                                                                                                                                                                                                                                                                                                                                                                                                   | 12 |
| Cellular Movement | migration                     | migration of leukocytes                        | 6,11E-28 | CCL2, CCL4, CCL5, CCL19, CCL21, CCR2, CCR5, CCR6, CD2, CD28, CD47, CD48, CD69, CD86, CD247, CD3E, CD8A, CORO1A, CSF1R, CTLA4, CTSS, CX3CR1, CXCL6, CXCL9, CXCR4, CYTIP, DOCK2, ETS1, FAS, FCER1A, FCER1G, FCGR2A, FYB, GNA13, HCK, HGF, ICOS, IL10RA, IL12RB1, ITGAL, ITGAM, ITGAX, ITGB2, ITK, LCK, LTF, LUM, LYN, MMP7, PIK3CD, PRF1, PRKCB, PTGDR, PTPRC, RAC2, RASSF5, RGS1, RUNX3, SELPLG, SERPINA3, SOCS3, TLR4, TNFRSF1B, TNFSF13B, XCL1                                                                                                                                                                                | 65 |
| Cellular Movement | migration                     | migration of mononuclear leukocytes            | 2,65E-22 | CCL2, CCL4, CCL5, CCL19, CCL21, CCR2, CCR5, CCR6, CD2, CD28, CD47, CD48, CD69, CD86, CD247, CD3E, CD8A, CTLA4, CTSS, CX3CR1, CXCL9, CXCR4, CYTIP, DOCK2, ETS1, FAS, FCER1A, FYB, GNA13, HGF, ICOS, ITGAL, ITGAM, ITGAX, ITGB2, ITK, LCK, PRF1, RASSF5, SELPLG, SOCS3, TLR4, TNFRSF1B, TNFSF13B, XCL1                                                                                                                                                                                                                                                                                                                           | 45 |
| Cellular Movement | migration                     | Lymphocyte migration                           | 3,97E-21 | CCL2, CCL4, CCL5, CCL19, CCL21, CCR2, CCR5, CCR6, CD2, CD28, CD47, CD48, CD69, CD86, CD247, CD3E, CD8A, CTLA4, CX3CR1, CXCL9, CXCR4, CYTIP, DOCK2, ETS1, FAS, FCER1A, FYB, GNA13, HGF, ICOS, ITGAL, ITGB2, ITK, LCK, PRF1, RASSF5, SELPLG, SOCS3, TLR4, TNFRSF1B, TNFSF13B, XCL1                                                                                                                                                                                                                                                                                                                                               | 42 |
| Cellular Movement | migration                     | migration of normal cells                      | 2,08E-20 | CBL, CCL2, CCL4, CCL5, CCL19, CCL21, CCR2, CCR5, CCR6, CD2, CD28, CD47, CD48, CD69, CD86, CD247, CD3E, CD8A, CORO1A, CSF1R, CTLA4, CTSS, CX3CR1, CXCL6, CXCL9, CXCR4, CYTIP, DOCK2, ETS1, FAS, FCER1A, FCER1G, FCGR2A, FHL2, FYB, GNA13, HCK, HGF, HIF1A, ICOS, IGHG1, IL10RA, IL12RB1, ITGAL, ITGAM, ITGAX, ITGB2, ITGB6, ITK, LCK, LTF, LUM, LYN, MAP3K1, MMP7, PIK3CD, PRF1, PRKCB, PTGDR, PTGER4, PTPRA, PTPRC, RAC2, RASSF5, RGS1, RUNX3, SELPLG, SERPINA3, SOCS3, ST8SIA4, TLR4, TNC, TNFRSF1B, TNFSF13B, VCAN, XCL1                                                                                                     | 76 |
| Cellular Movement | migration                     | migration of cells                             | 2,65E-19 | CBL, CCL2, CCL4, CCL5, CCL19, CCL21, CCR2, CCR5, CCR6, CD2, CD28, CD47, CD48, CD69, CD86, CD247, CD3E, CD8A, CORO1A, CSF1R, CSF2RB, CTLA4, CTSS, CX3CR1, CXCL6, CXCL9, CXCR4, CYTIP, DOCK2, ETS1, FAS, FCER1A, FCER1G, FCGR2A, FHL2, FPR3, FYB, GNA13, GZMB, HCK, HGF, HIF1A, ICOS, IGHG1, IL10RA, IL12RB1, ITGAL, ITGAM, ITGAX, ITGB2, ITGB6, ITK, KLRK1, LCK, LTF, LUM, LYN, MAP3K1, MMP7, MYO1F, PIK3CD, PLD1, PRF1, PRKCB, PTGDR, PTGER4, PTPRA, PTPRC, RAC2, RARRES1, RASSF5, RGS1, RGS18, RUNX2, RUNX3, SELPLG, SERPINA3, SH2D2A, SOCS3, SP100, ST8SIA4, STAT1, TLR4, TNC, TNFAIP8, TNFRSF1B, TNFSF13B, VCAN, XCL1, XCL2 | 90 |
| Cellular Movement | migration                     | migration of eukaryotic cells                  | 1,95E-18 | CBL, CCL2, CCL4, CCL5, CCL19, CCL21, CCR2, CCR5, CCR6, CD2, CD28, CD47, CD48, CD69, CD86, CD247, CD3E, CD8A, CORO1A, CSF1R, CSF2RB, CTLA4, CTSS, CX3CR1, CXCL6, CXCL9, CXCR4, CYTIP, DOCK2, ETS1, FAS, FCER1A, FCER1G, FCGR2A, FHL2, FPR3, FYB, GNA13, GZMB, HCK, HGF, HIF1A, ICOS, IGHG1, IL10RA, IL12RB1, ITGAL, ITGAM, ITGAX, ITGB2, ITGB6, ITK, KLRK1, LCK, LTF, LUM, LYN, MAP3K1, MMP7, PIK3CD, PLD1, PRF1, PRKCB, PTGDR, PTGER4, PTPRA, PTPRC, RAC2, RARRES1, RASSF5, RGS1, RUNX3, SELPLG, SERPINA3, SH2D2A, SOCS3, SP100, ST8SIA4, TLR4, TNC, TNFAIP8, TNFRSF1B, TNFSF13B, VCAN, XCL1                                   | 85 |
| Cellular Movement | migration                     | T cell migration                               | 2,66E-13 | CCL2, CCL4, CCL5, CCL19, CCL21, CCR2, CCR5, CCR6, CD28, CD69, CD86, CTLA4, CXCL9, CXCR4, DOCK2, FAS, FYB, HGF, ICOS, ITGB2, ITK, LCK, PRF1, SELPLG, SOCS3, TLR4, XCL1                                                                                                                                                                                                                                                                                                                                                                                                                                                          | 27 |
| Cellular Movement | migration                     | migration of lymphatic system cells            | 5,88E-11 | CCL4, CCL5, CD47, CXCL6, CXCL9, CXCR4, FAS, FHL2, HCK, HGF, HIF1A, ITGAL, ITGAM, ITGAX, ITGB2, LTF, LUM, MMP7, PIK3CD, PTGDR, TLR4                                                                                                                                                                                                                                                                                                                                                                                                                                                                                             | 21 |
| Cellular Movement | migration                     | migration of bone marrow cells                 | 1,12E-10 | CCL4, CCL5, CD47, CXCL6, CXCL9, CXCR4, FAS, FHL2, HCK, HIF1A, ITGAL, ITGAM, ITGAX, ITGB2, LTF, LUM, MMP7, PIK3CD, PTGDR, TLR4                                                                                                                                                                                                                                                                                                                                                                                                                                                                                                  | 20 |

|                   |               |                                         |          |                                                                                                                                                                                                                                                                                                                                                                                                                                                                                                                                          |    |
|-------------------|---------------|-----------------------------------------|----------|------------------------------------------------------------------------------------------------------------------------------------------------------------------------------------------------------------------------------------------------------------------------------------------------------------------------------------------------------------------------------------------------------------------------------------------------------------------------------------------------------------------------------------------|----|
| Cellular Movement | migration     | migration of phagocytes                 | 4,42E-09 | CCL2, CCL5, CD47, CSF1R, CXCL6, FAS, HCK, ITGAL, ITGAM, ITGAX, ITGB2, LUM, MMP7, PIK3CD, PTGDR, RAC2, TLR4                                                                                                                                                                                                                                                                                                                                                                                                                               | 17 |
| Cellular Movement | migration     | migration of granulocytes               | 7,42E-09 | CCL4, CCL5, CD47, CXCL6, CXCL9, FAS, HCK, ITGAL, ITGAM, ITGAX, ITGB2, LTF, LUM, MMP7, PIK3CD, PTGDR, TLR4                                                                                                                                                                                                                                                                                                                                                                                                                                | 17 |
| Cellular Movement | migration     | migration of neutrophils                | 3,31E-08 | CCL5, CD47, CXCL6, FAS, HCK, ITGAL, ITGAM, ITGAX, ITGB2, LUM, MMP7, PIK3CD, PTGDR, TLR4                                                                                                                                                                                                                                                                                                                                                                                                                                                  | 14 |
| Cellular Movement | migration     | migration of antigen presenting cells   | 9,83E-08 | CCL2, CCL4, CCL5, CCL19, CCL21, CCR2, CCR5, CD86, CSF1R, CXCL9, CXCR4, IL10RA, PTGDR, RAC2, RUNX3                                                                                                                                                                                                                                                                                                                                                                                                                                        | 15 |
| Cellular Movement | migration     | migration of dendritic cells            | 1,26E-07 | CCL4, CCL5, CCL19, CCL21, CCR2, CCR5, CD86, CXCL9, CXCR4, IL10RA, PTGDR, RAC2, RUNX3                                                                                                                                                                                                                                                                                                                                                                                                                                                     | 13 |
| Cellular Movement | migration     | migration of leukemia cell lines        | 2,03E-07 | CCL2, CCL5, CCR2, CD47, GNA13, ITGAL, ITGB2, KLRK1, LCK, SH2D2A                                                                                                                                                                                                                                                                                                                                                                                                                                                                          | 10 |
| Cellular Movement | cell movement | cell movement of blood cells            | 4,00E-23 | CASP1, CCL2, CCL4, CCL5, CCL19, CCL21, CCR2, CCR5, CCR6, CD2, CD28, CD47, CD48, CD86, CFH, CIITA, CORO1A, CSF1R, CTLA4, CTSS, CX3CR1, CXCL6, CXCL9, CXCR4, FAS, FCER1G, FCGR2A, GNA13, HCK, HGF, HIF1A, ICOS, IGHG1, IL12RB1, IL2RB, ITGAL, ITGAM, ITGAX, ITGB2, ITK, JAK3, LYN, NFKBIZ, PIK3CD, POU2AF1, PRF1, PRKCB, PTGDR, PTGES, PTPRC, RAC2, RGS1, RUNX3, SELPLG, SERPINA3, SOCS3, STAT1, TLR4, TNFRSF1B, XCL1                                                                                                                      | 60 |
| Cellular Movement | cell movement | cell movement of normal cells           | 1,19E-20 | CASP1, CBL, CCL2, CCL4, CCL5, CCL19, CCL21, CCR2, CCR5, CCR6, CD2, CD28, CD47, CD48, CD86, CFH, CIITA, CORO1A, CSF1R, CTLA4, CTSS, CX3CR1, CXCL6, CXCL9, CXCR4, FAS, FCER1G, FCGR2A, GNA13, HCK, HGF, HIF1A, ICOS, IGHG1, IL12RB1, IL2RB, ITGAL, ITGAM, ITGAX, ITGB2, ITK, JAK3, LCP2, LYN, MAP3K1, NFKBIZ, PIK3CD, POU2AF1, PRF1, PRKCB, PTGDR, PTGES, PTPRA, PTPRC, RAC2, RGS1, RUNX3, SELPLG, SERPINA3, SOCS3, STAT1, TLR4, TNFRSF1B, XCL1                                                                                            | 64 |
| Cellular Movement | cell movement | cell movement of leukocytes             | 1,39E-20 | CASP1, CCL2, CCL4, CCL5, CCL19, CCL21, CCR2, CCR5, CCR6, CD2, CD28, CD47, CD48, CD86, CFH, CORO1A, CSF1R, CTLA4, CTSS, CX3CR1, CXCL6, CXCL9, CXCR4, FAS, FCER1G, FCGR2A, GNA13, HCK, HGF, HIF1A, IGHG1, IL12RB1, IL2RB, ITGAL, ITGAM, ITGAX, ITGB2, ITK, LYN, PIK3CD, POU2AF1, PRF1, PRKCB, PTGDR, PTGES, PTPRC, RAC2, RGS1, RUNX3, SELPLG, SERPINA3, SOCS3, STAT1, TLR4, TNFRSF1B, XCL1                                                                                                                                                 | 56 |
| Cellular Movement | cell movement | cell movement                           | 2,84E-18 | ARPC1B, CASP1, CBL, CCL2, CCL4, CCL5, CCL19, CCL21, CCR2, CCR5, CCR6, CD2, CD28, CD47, CD48, CD69, CD86, CFH, CIITA, CORO1A, CSF1R, CTLA4, CTSS, CX3CR1, CXCL6, CXCL9, CXCR4, CXCR6 (includes EG:10663), DOCK2, FAS, FCER1G, FCGR2A, FPR3, GNA13, HCK, HGF, HIF1A, ICOS, IGHG1, IL12RB1, IL2RB, ITGAL, ITGAM, ITGAX, ITGB2, ITK, JAK3, LCK, LCP1, LCP2, LYN, MAP3K1, NFKBIZ, PCDH10, PIK3CD, PLD1, POU2AF1, PRF1, PRKCB, PTGDR, PTGES, PTPRA, PTPRC, RAC2, RGS1, RUNX3, SELPLG, SERPINA3, SOCS3, STAT1, TLR4, TNFRSF1B, VCAN, VNN2, XCL1 | 75 |
| Cellular Movement | cell movement | cell movement of eukaryotic cells       | 2,86E-18 | ARPC1B, CASP1, CBL, CCL2, CCL4, CCL5, CCL19, CCL21, CCR2, CCR5, CCR6, CD2, CD28, CD47, CD48, CD69, CD86, CFH, CIITA, CORO1A, CSF1R, CTLA4, CTSS, CX3CR1, CXCL6, CXCL9, CXCR4, FAS, FCER1G, FCGR2A, GNA13, HCK, HGF, HIF1A, ICOS, IGHG1, IL12RB1, IL2RB, ITGAL, ITGAM, ITGAX, ITGB2, ITK, JAK3, LCK, LCP1, LCP2, LYN, MAP3K1, NFKBIZ, PCDH10, PIK3CD, POU2AF1, PRF1, PRKCB, PTGDR, PTGES, PTPRA, PTPRC, RAC2, RGS1, RUNX3, SELPLG, SERPINA3, SOCS3, STAT1, TLR4, TNFRSF1B, XCL1                                                           | 69 |
| Cellular Movement | cell movement | cell movement of lymphatic system cells | 6,65E-17 | CASP1, CBL, CCL2, CCL4, CCL5, CCL21, CCR2, CD2, CD28, CD47, CD48, CFH, CORO1A, CXCL6, CXCL9, FAS, FCER1G, FCGR2A, HCK, HGF, IL2RB, ITGAL, ITGAM, ITGAX, ITGB2, ITK, LCP2, PIK3CD, PTGDR, PTPRC, RAC2, RUNX3, SELPLG, SOCS3, TLR4, TNFRSF1B, XCL1                                                                                                                                                                                                                                                                                         | 37 |
| Cellular Movement | cell movement | cell movement of phagocytes             | 4,85E-16 | CASP1, CCL2, CCL4, CCL5, CCL21, CCR2, CCR5, CCR6, CD28, CD47, CFH, CORO1A, CSF1R, CX3CR1, CXCL6, CXCL9, FAS, FCER1G, FCGR2A, HCK, HGF, HIF1A, IL12RB1, ITGAL, ITGAM, ITGAX, ITGB2, PIK3CD, PTGDR, PTGES, RAC2, SELPLG, SOCS3, TLR4, TNFRSF1B, XCL1                                                                                                                                                                                                                                                                                       | 36 |
| Cellular Movement | cell movement | cell movement of myeloid cells          | 9,97E-16 | CASP1, CCL2, CCL4, CCL5, CCL21, CCR2, CD2, CD28, CD47, CD48, CFH, CORO1A, CXCL6, CXCL9, FAS, FCER1G, FCGR2A, HCK, HGF, IL2RB, ITGAL, ITGAM, ITGAX, ITGB2, ITK, PIK3CD, PTGDR, PTPRC, RAC2, RUNX3, SELPLG, SOCS3, TLR4, TNFRSF1B, XCL1                                                                                                                                                                                                                                                                                                    | 35 |
| Cellular Movement | cell movement | cell movement of                        | 5,63E-15 | CASP1, CCL2, CCL4, CCL5, CCL21, CCR2, CD2, CD28, CD47, CD48, CFH, CORO1A, CXCL6, CXCL9, FAS, FCER1G, FCGR2A, HCK, HGF, IL2RB, ITGAL,                                                                                                                                                                                                                                                                                                                                                                                                     | 34 |

|                   |               |                                           |          |                                                                                                                                                                                                                                                                                                                      |    |
|-------------------|---------------|-------------------------------------------|----------|----------------------------------------------------------------------------------------------------------------------------------------------------------------------------------------------------------------------------------------------------------------------------------------------------------------------|----|
|                   | ent           | granulocytes                              |          | ITGAM, ITGAX, ITGB2, ITK, PIK3CD, PTGDR, RAC2, RUNX3, SELPLG, SOCS3, TLR4, TNFRSF1B, XCL1                                                                                                                                                                                                                            |    |
| Cellular Movement | cell movement | cell movement of mononuclear leukocytes   | 2,05E-14 | CCL2, CCL4, CCL5, CCL19, CCL21, CCR2, CCR5, CD28, CD47, CD86, CTLA4, CTSS, CXCL9, CXCR4, FAS, GNA13, IGHG1, ITGAL, ITGAX, ITGB2, ITK, PIK3CD, POU2AF1, PRF1, PRKCB, PTGDR, PTGES, RAC2, RGS1, SELPLG, SERPINA3, SOCS3, TLR4, XCL1                                                                                    | 34 |
| Cellular Movement | cell movement | cell movement of neutrophils              | 2,82E-13 | CASP1, CCL2, CCL4, CCL5, CCL21, CCR2, CD28, CD47, CFH, CORO1A, CXCL6, FAS, FCER1G, FCGR2A, HCK, HGF, ITGAL, ITGAM, ITGAX, ITGB2, PIK3CD, PTGDR, RAC2, SELPLG, SOCS3, TLR4, TNFRSF1B, XCL1                                                                                                                            | 28 |
| Cellular Movement | cell movement | cell movement of lymphocytes              | 1,59E-12 | CCL2, CCL4, CCL5, CCL19, CCL21, CCR2, CCR5, CD28, CD86, CTLA4, CXCL9, CXCR4, FAS, GNA13, IGHG1, ITGB2, ITK, PIK3CD, POU2AF1, PRF1, PTGDR, PTGES, RAC2, RGS1, SELPLG, SOCS3, TLR4, XCL1                                                                                                                               | 28 |
| Cellular Movement | cell movement | cell movement of antigen presenting cells | 8,60E-10 | CCL2, CCL4, CCL5, CCL19, CCL21, CCR2, CCR5, CCR6, CD86, CSF1R, CX3CR1, CXCL9, HGF, HIF1A, IL12RB1, ITGB2, PIK3CD, PTGDR, PTGES, RAC2, TLR4                                                                                                                                                                           | 21 |
| Cellular Movement | cell movement | cell movement of T lymphocytes            | 8,64E-10 | CCL2, CCL4, CCL5, CCL19, CCL21, CCR2, CCR5, CD28, CD86, CTLA4, CXCL9, CXCR4, FAS, ITGB2, ITK, PRF1, SELPLG, SOCS3, TLR4, XCL1                                                                                                                                                                                        | 20 |
| Cellular Movement | cell movement | cell movement of B lymphocytes            | 5,22E-08 | CCL19, CCL21, CCR2, CXCL9, PIK3CD, POU2AF1, RAC2, RGS1, SELPLG, TLR4                                                                                                                                                                                                                                                 | 10 |
| Cellular Movement | cell movement | cell movement of macrophages              | 6,26E-08 | CCL2, CCL4, CCL5, CCR2, CCR5, CCR6, CSF1R, CX3CR1, CXCL9, HGF, HIF1A, IL12RB1, ITGB2, PIK3CD, PTGES, RAC2                                                                                                                                                                                                            | 16 |
| Cellular Movement | cell movement | cell movement of memory T lymphocytes     | 1,29E-07 | CCL2, CCL5, CCL19, CCL21, CD28, CXCL9, ITGB2                                                                                                                                                                                                                                                                         | 7  |
| Cellular Movement | cell movement | cell movement of eosinophils              | 1,67E-07 | CCL2, CCL5, CCL21, CD2, CD47, CD48, CXCL9, IL2RB, ITGAL, ITGAM, ITGB2, ITK, RUNX3                                                                                                                                                                                                                                    | 13 |
| Cellular Movement | cell movement | cell movement of bone marrow cells        | 4,66E-07 | CCL2, CCL4, CD47, CXCL9, ITGAL, ITGAM, ITGAX, ITGB2, PIK3CD, PTGDR, TLR4                                                                                                                                                                                                                                             | 11 |
| Cellular Movement | cell movement | cell movement of mononuclear cells        | 1,63E-06 | CCL2, CCL4, CCR2, CCR5, CIITA, ICOS, JAK3, NFKBIZ                                                                                                                                                                                                                                                                    | 8  |
| Cellular Movement | homing        | homing of leukocytes                      | 2,52E-14 | CCL2, CCL4, CCL5, CCL19, CCL21, CCR2, CCR5, CD28, CORO1A, CX3CR1, CXCL6, CXCL9, CXCR4, FCER1G, FCGR2A, GNA13, HCK, IGHG1, IL12RB1, ITGAL, ITGAM, ITGB2, LYN, PIK3CD, PRKCB, PTGDR, PTPRC, RAC2, RGS1, SELPLG, SERPINA3, SOCS3, TLR4, XCL1                                                                            | 34 |
| Cellular Movement | homing        | homing of cells                           | 7,48E-14 | CBL, CCL2, CCL4, CCL5, CCL19, CCL21, CCR2, CCR5, CCR6, CD28, CD47, CD69, CORO1A, CX3CR1, CXCL6, CXCL9, CXCR4, CXCR6 (includes EG:10663), FCER1G, FCGR2A, GNA13, HCK, HGF, IGHG1, IL12RB1, ITGAL, ITGAM, ITGB2, LCK, LYN, MAP3K1, PIK3CD, PRKCB, PTGDR, PTPRA, PTPRC, RAC2, RGS1, SELPLG, SERPINA3, SOCS3, TLR4, XCL1 | 43 |
| Cellular Movement | homing        | homing of normal cells                    | 8,36E-14 | CCL2, CCL4, CCL5, CCL19, CCL21, CCR2, CCR5, CD28, CORO1A, CX3CR1, CXCL6, CXCL9, CXCR4, FCER1G, FCGR2A, GNA13, HCK, HGF, IGHG1, IL12RB1, ITGAL, ITGAM, ITGB2, LYN, MAP3K1, PIK3CD, PRKCB, PTGDR, PTPRA, PTPRC, RAC2, RGS1, SELPLG, SERPINA3, SOCS3, TLR4, XCL1                                                        | 37 |
| Cellular Movement | homing        | homing of eukaryotic cells                | 1,38E-13 | CBL, CCL2, CCL4, CCL5, CCL19, CCL21, CCR2, CCR5, CD28, CD47, CD69, CORO1A, CX3CR1, CXCL6, CXCL9, CXCR4, FCER1G, FCGR2A, GNA13, HCK, HGF, IGHG1, IL12RB1, ITGAL, ITGAM, ITGB2, LCK, LYN, MAP3K1, PIK3CD, PRKCB, PTGDR, PTPRA, PTPRC, RAC2, RGS1, SELPLG, SERPINA3, SOCS3, TLR4, XCL1                                  | 41 |
| Cellular Movement | homing        | homing of lymphocytes                     | 3,18E-10 | CCL2, CCL4, CCL5, CCL19, CCL21, CCR2, CCR5, CXCL9, CXCR4, GNA13, IGHG1, PIK3CD, PTGDR, RAC2, RGS1, SELPLG, SOCS3, TLR4, XCL1                                                                                                                                                                                         | 19 |
| Cellular Movement | homing        | homing of mononuclear leukocytes          | 3,40E-10 | CCL2, CCL4, CCL5, CCL19, CCL21, CCR2, CCR5, CXCL9, CXCR4, GNA13, IGHG1, ITGAL, PIK3CD, PRKCB, PTGDR, RAC2, RGS1, SELPLG, SERPINA3, SOCS3, TLR4, XCL1                                                                                                                                                                 | 22 |
| Cellular Movement | homing        | homing of B lymphocytes                   | 1,83E-07 | CCL19, CCL21, CCR2, CXCL9, PIK3CD, RAC2, RGS1, TLR4                                                                                                                                                                                                                                                                  | 8  |
| Cellular Movement | chemotaxis    | chemotaxis                                | 6,44E-14 | CBL, CCL2, CCL4, CCL5, CCL19, CCL21, CCR2, CCR5, CCR6, CD28, CD47, CD69, CORO1A, CX3CR1, CXCL6, CXCL9, CXCR4, DOCK2, FCER1G,                                                                                                                                                                                         | 43 |

|                   |                 |                                             |          |                                                                                                                                                                                                                                                                             |    |
|-------------------|-----------------|---------------------------------------------|----------|-----------------------------------------------------------------------------------------------------------------------------------------------------------------------------------------------------------------------------------------------------------------------------|----|
|                   |                 |                                             |          | FCGR2A, FPR3, GNA13, HCK, HGF, IL12RB1, ITGAL, ITGAM, ITGB2, LCK, LYN, MAP3K1, PIK3CD, PLD1, PRKCB, PTGDR, PTPRC, RAC2, RGS1, SELPLG, SERPINA3, SOCS3, TLR4, XCL1                                                                                                           |    |
| Cellular Movement | chemotaxis      | chemotaxis of leukocytes                    | 2,49E-13 | CCL2, CCL4, CCL5, CCL19, CCL21, CCR2, CCR5, CD28, CORO1A, CX3CR1, CXCL6, CXCL9, CXCR4, FCER1G, FCGR2A, GNA13, HCK, IL12RB1, ITGAL, ITGAM, ITGB2, LYN, PIK3CD, PRKCB, PTGDR, PTPRC, RAC2, RGS1, SERPINA3, SOCS3, TLR4, XCL1                                                  | 32 |
| Cellular Movement | chemotaxis      | chemotaxis of eukaryotic cells              | 4,60E-13 | CBL, CCL2, CCL4, CCL5, CCL19, CCL21, CCR2, CCR5, CD28, CD47, CD69, CORO1A, CX3CR1, CXCL6, CXCL9, CXCR4, FCER1G, FCGR2A, GNA13, HCK, HGF, IL12RB1, ITGAL, ITGAM, ITGB2, LCK, LYN, MAP3K1, PIK3CD, PRKCB, PTGDR, PTPRC, RAC2, RGS1, SELPLG, SERPINA3, SOCS3, TLR4, XCL1       | 39 |
| Cellular Movement | chemotaxis      | chemotaxis of cells                         | 9,00E-13 | CBL, CCL2, CCL4, CCL5, CCL19, CCL21, CCR2, CCR5, CCR6, CD28, CD47, CD69, CORO1A, CX3CR1, CXCL6, CXCL9, CXCR4, FCER1G, FCGR2A, GNA13, HCK, HGF, IL12RB1, ITGAL, ITGAM, ITGB2, LCK, LYN, MAP3K1, PIK3CD, PRKCB, PTGDR, PTPRC, RAC2, RGS1, SELPLG, SERPINA3, SOCS3, TLR4, XCL1 | 40 |
| Cellular Movement | chemotaxis      | chemotaxis of normal cells                  | 2,26E-12 | CCL2, CCL4, CCL5, CCL19, CCL21, CCR2, CCR5, CD28, CORO1A, CX3CR1, CXCL6, CXCL9, CXCR4, FCER1G, FCGR2A, GNA13, HCK, HGF, IL12RB1, ITGAL, ITGAM, ITGB2, LYN, MAP3K1, PIK3CD, PRKCB, PTGDR, PTPRC, RAC2, RGS1, SERPINA3, SOCS3, TLR4, XCL1                                     | 34 |
| Cellular Movement | chemotaxis      | chemotaxis of mononuclear leukocytes        | 1,60E-08 | CCL2, CCL4, CCL5, CCL19, CCL21, CCR2, CCR5, CXCL9, CXCR4, GNA13, ITGAL, PRKCB, PTGDR, RAC2, RGS1, SERPINA3, SOCS3, TLR4, XCL1                                                                                                                                               | 19 |
| Cellular Movement | chemotaxis      | chemotaxis of lymphocytes                   | 1,63E-08 | CCL2, CCL4, CCL5, CCL19, CCL21, CCR2, CCR5, CXCL9, CXCR4, GNA13, PTGDR, RAC2, RGS1, SOCS3, TLR4, XCL1                                                                                                                                                                       | 16 |
| Cellular Movement | chemotaxis      | chemotaxis of phagocytes                    | 2,48E-08 | CCL2, CCL4, CCL5, CD28, CORO1A, CX3CR1, CXCL6, CXCL9, FCER1G, FCGR2A, HCK, IL12RB1, ITGAM, ITGB2, PIK3CD, RAC2, XCL1                                                                                                                                                        | 17 |
| Cellular Movement | chemotaxis      | chemotaxis of myeloid cells                 | 1,27E-06 | CCL2, CCL4, CCL5, CD28, CORO1A, CXCL6, CXCL9, FCER1G, FCGR2A, HCK, ITGAM, ITGB2, PTPRC, RAC2, XCL1                                                                                                                                                                          | 15 |
| Cellular Movement | chemotaxis      | chemotaxis of neutrophils                   | 1,41E-06 | CCL2, CCL4, CCL5, CD28, CORO1A, CXCL6, FCER1G, FCGR2A, HCK, ITGAM, ITGB2, RAC2, XCL1                                                                                                                                                                                        | 13 |
| Cellular Movement | chemotaxis      | chemotaxis of B lymphocytes                 | 1,68E-06 | CCL19, CCL21, CCR2, CXCL9, RAC2, RGS1, TLR4                                                                                                                                                                                                                                 | 7  |
| Cellular Movement | adhesion        | adhesion of T lymphocytes                   | 7,51E-12 | CCL4, CCL19, CCL21, CD2, CD47, CD48, CXCL9, FAS, FYB, HGF, ICOS, ITGAL, ITGB2, ITK, RASSF5, SELPLG, TLR4                                                                                                                                                                    | 17 |
| Cellular Movement | infiltration    | infiltration of cells                       | 1,78E-11 | CBL, CCL2, CCL4, CCL19, CCL21, CCR2, CCR5, CD86, CIITA, CSF1R, CTLA4, FAS, HIF1A, ICOS, ITGAM, ITK, JAK3, LCP2, NFKBIZ, PRF1, PTGES, SELPLG, SOCS3, STAT1, TLR4, TNFRSF1B, XCL1                                                                                             | 27 |
| Cellular Movement | infiltration    | infiltration by neutrophils                 | 9,60E-09 | CASP1, CCL4, CCL21, CCR2, CFH, FAS, FCER1G, HGF, ITGAL, ITGAM, ITGB2, RAC2, SOCS3, TLR4, TNFRSF1B, XCL1                                                                                                                                                                     | 16 |
| Cellular Movement | infiltration    | infiltration of leukocytes                  | 3,61E-08 | CCL2, CCL4, CCL19, CCL21, CCR2, CCR5, CD86, CSF1R, CTLA4, FAS, HIF1A, ITGAM, ITK, PRF1, PTGES, SELPLG, STAT1, TLR4, TNFRSF1B, XCL1                                                                                                                                          | 20 |
| Cellular Movement | infiltration    | infiltration by T lymphocytes               | 1,38E-07 | CCL19, CCL21, CCR2, CCR5, CD86, CTLA4, FAS, ITK, PRF1, SELPLG, XCL1                                                                                                                                                                                                         | 11 |
| Cellular Movement | transmigration  | transmigration of leukocytes                | 7,97E-11 | CCL2, CCL4, CCL5, CCL19, CD28, CD47, CD86, CTSS, CXCL9, CXCR4, ITGAL, ITGAM, ITGAX, ITGB2, PIK3CD, PTGDR, TLR4                                                                                                                                                              | 17 |
| Cellular Movement | transmigration  | transmigration of mononuclear leukocytes    | 1,71E-08 | CCL2, CCL4, CCL5, CD28, CD47, CD86, CTSS, CXCR4, ITGAL, ITGAX, ITGB2                                                                                                                                                                                                        | 11 |
| Cellular Movement | transmigration  | transmigration of granulocytes              | 6,48E-07 | CD47, CXCL9, ITGAL, ITGAM, ITGAX, ITGB2, PIK3CD, PTGDR, TLR4                                                                                                                                                                                                                | 9  |
| Cellular Movement | transmigration  | transmigration of neutrophils               | 7,77E-07 | CD47, ITGAL, ITGAM, ITGAX, ITGB2, PIK3CD, PTGDR, TLR4                                                                                                                                                                                                                       | 8  |
| Cellular Movement | recruitment     | recruitment of T lymphocytes                | 7,48E-10 | CCL2, CCL4, CCL5, CCL19, CCL21, CCR2, CCR6, CD8A, CXCL9, CXCR4, ETS1, FCER1A                                                                                                                                                                                                | 12 |
| Cellular Movement | trafficking     | trafficking of cells                        | 2,09E-09 | CCL4, CCL5, CCL19, CCR2, CCR5, CX3CR1, CXCR4, CXCR6 (includes EG:10663), ITGB2, TLR4, TNFRSF1B                                                                                                                                                                              | 11 |
| Cellular Movement | trafficking     | trafficking of leukocytes                   | 4,51E-07 | CCL4, CCL5, CCL19, CCR2, CCR5, ITGB2, TLR4, TNFRSF1B                                                                                                                                                                                                                        | 8  |
| Cellular Movement | chemoattraction | chemoattraction of antigen presenting cells | 1,29E-07 | CCL2, CCL4, CCL5, CCL19, CXCL9, IL12RB1, TLR4                                                                                                                                                                                                                               | 7  |

|                     |                                                    |                                                  |          |                                                                                                                                                                                                                                                                                                                                       |    |
|---------------------|----------------------------------------------------|--------------------------------------------------|----------|---------------------------------------------------------------------------------------------------------------------------------------------------------------------------------------------------------------------------------------------------------------------------------------------------------------------------------------|----|
| Cellular Movement   | chemo attracti on                                  | chemoattracti on of macrophages                  | 1,02E-06 | CCL2, CCL4, CCL5, CXCL9, IL12RB1                                                                                                                                                                                                                                                                                                      | 5  |
| Cellular Movement   | extrava sation                                     | extravasation of antigen presenting cells        | 4,61E-07 | CCL2, CCL4, CCL5, CCR2, CCR5                                                                                                                                                                                                                                                                                                          | 5  |
| Cell Signaling      | mobiliz ation                                      | mobilization of calcium                          | 1,73E-23 | BTK, C3AR1, CBL, CCL2, CCL4, CCL5, CCL19, CCL21, CCR2, CCR5, CCR6, CD2, CD28, CD247, CD3D, CD3E, CD3G, CLEC4C, CX3CR1, CXCL9, CXCR4, FAS, FCER1A, FCER1G, FCGR1A, FCGR2A, FCGR3B, FCRL3, GNA13, ITGB2, ITK, KLRC2, KLRD1, KLRK1, LAT2, LCK, LCP2, LYN, PLSR1, PTGDR, PTPRC, RAC2, SH2D2A, TRA@, TRAT1, TRD@, TYROBP, VAV1, XCL1, XCL2 | 50 |
| Cell Signaling      | mobiliz ation                                      | mobilization of Ca2+                             | 1,56E-12 | BTK, CBL, CCL2, CCL4, CCL5, CCL21, CD247, CD3D, CD3E, CD3G, CLEC4C, CXCL9, CXCR4, FCGR2A, ITGB2, KLRK1, LCK, PTGDR, TRA@, TRAT1, TYROBP, VAV1, XCL1                                                                                                                                                                                   | 23 |
| Cell Signaling      | flux                                               | flux of calcium                                  | 6,56E-18 | BTK, CCL2, CCL4, CCL5, CCL19, CCL21, CCR2, CCR5, CD2, CD28, CD247, CD300A, CD3E, CD8A, CXCR4, FAS, FCER1A, FCER1G, FCGR1A, FCGR2A, FCGR3B, FPR3, HCK, ICOS, IGHM, ITGB2, ITK, LAT2, LAX1, LCP2, LYN, PIK3CD, PRF1, PRKCB, RAC2, VAV1                                                                                                  | 36 |
| Cell Signaling      | flux                                               | flux of Ca2+                                     | 3,14E-07 | CCL2, CCL4, CCL5, CCR5, CD28, CD3E, CXCR4, FAS, ICOS, ITGB2, LYN, PRF1, PRKCB, VAV1                                                                                                                                                                                                                                                   | 14 |
| Cell Signaling      | tyrosin e phosph orylation                         | tyrosine phosphorylati on of protein             | 4,28E-17 | CBL, CCL4, CCL5, CD2, CD28, CD47, CD48, CD244, CD247, CD3E, CD8A, CLEC4C, CSF1R, CTLA4, FAS, FCER1A, FCER1G, FCGR2A, FCRL3, HCK, IGHM, ITGAM, ITGB2, JAK3, LAX1, LCK, LYN, PTPN22, PTPRA, PTPRC, SH2D1A, TYROBP                                                                                                                       | 32 |
| Cell Signaling      | cell surface recepto r linked signal transdu ction | cell surface receptor linked signal transduction | 1,41E-12 | BIRC3, CBL, CCR2, CD2, CD28, CD247, CD3E, CD3G, CD8A, CLEC2D (includes EG:29121), CX3CR1, FCER1A, FCER1G, FCGR1A, FCGR2A, IFITM1, IL12RB1, IL2RB, IL7R, ITGAL, JAK3, KLRB1, KLRD1, LCK, LCP2, LY96, PIK3CD, PTPRC, PTPRE, RUNX2, STAT1, STAT4, TNFRSF1B                                                                               | 33 |
| Cell Signaling      | quantit y                                          | quantity of calcium                              | 4,81E-11 | BTK, C3AR1, CCL2, CCL4, CCL5, CCL19, CCL21, CCR5, CD2, CD28, CD247, CD3E, CD8A, CX3CR1, CXCL9, CXCR4, FAS, FCER1A, FCER1G, FCGR2A, FCGR3B, GNA13, HGF, IGHM, IGKC, ITGAM, LAT2, LCK, LCP2, LYN, LYZ, PIK3CD, PLD1, PRKCB, PTPRC, RGS1, VAV1                                                                                           | 37 |
| Cell Signaling      | quantit y                                          | quantity of Ca2+                                 | 1,68E-06 | BTK, C3AR1, CCL2, CCL4, CCL5, CCR2, CCR5, CCR6, CD28, CD52, CXCL9, CXCR4, GNA13, HGF, JAK3, LCK, LYN, LYZ, PIK3CD, PRKCB, PTPRC, RGS1, VAV1                                                                                                                                                                                           | 23 |
| Cell Signaling      | secreti on                                         | secretion of nitric oxide                        | 3,15E-07 | CASP1, CD8A, PTPRC, SOCS3, STAT1, TLR4                                                                                                                                                                                                                                                                                                | 6  |
| Cell Signaling      | influx                                             | influx of calcium                                | 3,80E-07 | BTK, CCL4, CCL5, CCR5, CD28, CD300A, CXCR4, FAS, FCER1A, FCGR2A, FCGR3B, IGHM, ITK, LYN, PIK3CD, PRKCB                                                                                                                                                                                                                                | 16 |
| Cell Signaling      | release                                            | release of calcium                               | 4,82E-07 | CCL4, CCL5, CCR5, CD28, CSF1R, FCER1G, FCGR1A, FCGR2A, FPR3, HCST, IGHM, ITK, LCK, PTPRA, PTPRC, RGS1, VAV1, XCL1                                                                                                                                                                                                                     | 18 |
| Molecular Transport | mobiliz ation                                      | mobilization of calcium                          | 1,73E-23 | BTK, C3AR1, CBL, CCL2, CCL4, CCL5, CCL19, CCL21, CCR2, CCR5, CCR6, CD2, CD28, CD247, CD3D, CD3E, CD3G, CLEC4C, CX3CR1, CXCL9, CXCR4, FAS, FCER1A, FCER1G, FCGR1A, FCGR2A, FCGR3B, FCRL3, GNA13, ITGB2, ITK, KLRC2, KLRD1, KLRK1, LAT2, LCK, LCP2, LYN, PLSR1, PTGDR, PTPRC, RAC2, SH2D2A, TRA@, TRAT1, TRD@, TYROBP, VAV1, XCL1, XCL2 | 50 |
| Molecular Transport | mobiliz ation                                      | mobilization of Ca2+                             | 1,56E-12 | BTK, CBL, CCL2, CCL4, CCL5, CCL21, CD247, CD3D, CD3E, CD3G, CLEC4C, CXCL9, CXCR4, FCGR2A, ITGB2, KLRK1, LCK, PTGDR, TRA@, TRAT1, TYROBP, VAV1, XCL1                                                                                                                                                                                   | 23 |
| Molecular Transport | flux                                               | flux of calcium                                  | 6,56E-18 | BTK, CCL2, CCL4, CCL5, CCL19, CCL21, CCR2, CCR5, CD2, CD28, CD247, CD300A, CD3E, CD8A, CXCR4, FAS, FCER1A, FCER1G, FCGR1A, FCGR2A, FCGR3B, FPR3, HCK, ICOS, IGHM, ITGB2, ITK, LAT2, LAX1, LCP2, LYN, PIK3CD, PRF1, PRKCB, RAC2, VAV1                                                                                                  | 36 |
| Molecular Transport | flux                                               | flux of Ca2+                                     | 3,14E-07 | CCL2, CCL4, CCL5, CCR5, CD28, CD3E, CXCR4, FAS, ICOS, ITGB2, LYN, PRF1, PRKCB, VAV1                                                                                                                                                                                                                                                   | 14 |
| Molecular Transport | quantit y                                          | quantity of calcium                              | 4,81E-11 | BTK, C3AR1, CCL2, CCL4, CCL5, CCL19, CCL21, CCR5, CD2, CD28, CD247, CD3E, CD8A, CX3CR1, CXCL9, CXCR4, FAS, FCER1A, FCER1G, FCGR2A, FCGR3B, GNA13, HGF, IGHM, IGKC, ITGAM, LAT2, LCK, LCP2, LYN, LYZ, PIK3CD, PLD1, PRKCB, PTPRC, RGS1, VAV1                                                                                           | 37 |
| Molecular Transport | quantit y                                          | quantity of                                      | 1,68E-06 | BTK, C3AR1, CCL2, CCL4, CCL5, CCR2, CCR5, CCR6, CD28, CD52, CXCL9,                                                                                                                                                                                                                                                                    | 23 |

|                                |                 |                                  |          |                                                                                                                                                                                                                                                                                                                                        |    |
|--------------------------------|-----------------|----------------------------------|----------|----------------------------------------------------------------------------------------------------------------------------------------------------------------------------------------------------------------------------------------------------------------------------------------------------------------------------------------|----|
| Transport                      | y               | Ca2+                             |          | CXCR4, GNA13, HGF, JAK3, LCK, LYN, LYZ, PIK3CD, PRKCB, PTPRC, RGS1, VAV1                                                                                                                                                                                                                                                               |    |
| Molecular Transport            | secretion       | secretion of nitric oxide        | 3,15E-07 | CASP1, CD8A, PTPRC, SOCS3, STAT1, TLR4                                                                                                                                                                                                                                                                                                 | 6  |
| Molecular Transport            | influx          | influx of calcium                | 3,80E-07 | BTK, CCL4, CCL5, CCR5, CD28, CD300A, CXCR4, FAS, FCER1A, FCGR2A, FCGR3B, IGHM, ITK, LYN, PIK3CD, PRKCB                                                                                                                                                                                                                                 | 16 |
| Molecular Transport            | release         | release of calcium               | 4,82E-07 | CCL4, CCL5, CCR5, CD28, CSF1R, FCER1G, FCGR1A, FCGR2A, FPR3, HCST, IGHM, ITK, LCK, PTPRA, PTPRC, RGS1, VAV1, XCL1                                                                                                                                                                                                                      | 18 |
| Molecular Transport            | release         | release of superoxide            | 1,00E-06 | CCL2, CYBB, FCER1G, FCGR2A, HCK, ITGB2, LYN, NCF2                                                                                                                                                                                                                                                                                      | 8  |
| Vitamin and Mineral Metabolism | mobilization    | mobilization of calcium          | 1,73E-23 | BTK, C3AR1, CBL, CCL2, CCL4, CCL5, CCL19, CCL21, CCR2, CCR5, CCR6, CD2, CD28, CD247, CD3D, CD3E, CD3G, CLEC4C, CX3CR1, CXCL9, CXCR4, FAS, FCER1A, FCER1G, FCGR1A, FCGR2A, FCGR3B, FCRL3, GNA13, ITGB2, ITK, KLRC2, KLRD1, KLRK1, LAT2, LCK, LCP2, LYN, PLSCR1, PTGDR, PTPRC, RAC2, SH2D2A, TRA@, TRAT1, TRD@, TYROBP, VAV1, XCL1, XCL2 | 50 |
| Vitamin and Mineral Metabolism | mobilization    | mobilization of Ca2+             | 1,56E-12 | BTK, CBL, CCL2, CCL4, CCL5, CCL21, CD247, CD3D, CD3E, CD3G, CLEC4C, CXCL9, CXCR4, FCGR2A, ITGB2, KLRK1, LCK, PTGDR, TRA@, TRAT1, TYROBP, VAV1, XCL1                                                                                                                                                                                    | 23 |
| Vitamin and Mineral Metabolism | flux            | flux of calcium                  | 6,56E-18 | BTK, CCL2, CCL4, CCL5, CCL19, CCL21, CCR2, CCR5, CD2, CD28, CD247, CD300A, CD3E, CD8A, CXCR4, FAS, FCER1A, FCER1G, FCGR1A, FCGR2A, FCGR3B, FPR3, HCK, ICOS, IGHM, ITGB2, ITK, LAT2, LAX1, LCP2, LYN, PIK3CD, PRF1, PRKCB, RAC2, VAV1                                                                                                   | 36 |
| Vitamin and Mineral Metabolism | flux            | flux of Ca2+                     | 3,14E-07 | CCL2, CCL4, CCL5, CCR5, CD28, CD3E, CXCR4, FAS, ICOS, ITGB2, LYN, PRF1, PRKCB, VAV1                                                                                                                                                                                                                                                    | 14 |
| Vitamin and Mineral Metabolism | quantity        | quantity of calcium              | 4,81E-11 | BTK, C3AR1, CCL2, CCL4, CCL5, CCL19, CCL21, CCR5, CD2, CD28, CD247, CD3E, CD8A, CX3CR1, CXCL9, CXCR4, FAS, FCER1A, FCER1G, FCGR2A, FCGR3B, GNA13, HGF, IGHM, IGKC, ITGAM, LAT2, LCK, LCP2, LYN, LYZ, PIK3CD, PLD1, PRKCB, PTPRC, RGS1, VAV1                                                                                            | 37 |
| Vitamin and Mineral Metabolism | quantity        | quantity of Ca2+                 | 1,68E-06 | BTK, C3AR1, CCL2, CCL4, CCL5, CCR2, CCR5, CCR6, CD28, CD52, CXCL9, CXCR4, GNA13, HGF, JAK3, LCK, LYN, LYZ, PIK3CD, PRKCB, PTPRC, RGS1, VAV1                                                                                                                                                                                            | 23 |
| Vitamin and Mineral Metabolism | influx          | influx of calcium                | 3,80E-07 | BTK, CCL4, CCL5, CCR5, CD28, CD300A, CXCR4, FAS, FCER1A, FCGR2A, FCGR3B, IGHM, ITK, LYN, PIK3CD, PRKCB                                                                                                                                                                                                                                 | 16 |
| Vitamin and Mineral Metabolism | release         | release of calcium               | 4,82E-07 | CCL4, CCL5, CCR5, CD28, CSF1R, FCER1G, FCGR1A, FCGR2A, FPR3, HCST, IGHM, ITK, LCK, PTPRA, PTPRC, RGS1, VAV1, XCL1                                                                                                                                                                                                                      | 18 |
| Humoral Immune Response        | proliferation   | proliferation of B lymphocytes   | 6,03E-18 | BTK, CBL, CCND2, CD86, CD244, CD3E, CD8A, FAS, HCK, HIF1A, IGHM, IGKC, IL2RG, IL7R, IRF4, IRF8, LEF1, LY75, LY86, LY96, LYN, MAP3K1, PIK3CD, PRKCB, PTPRC, SASH3, SLAMF7, STAT1, TLR4, TLR7, TNFRSF17, TNFSF13B, VAV1                                                                                                                  | 33 |
| Humoral Immune Response        | quantity        | quantity of B lymphocytes        | 1,56E-16 | AHR, BCL2A1, BTK, CCR6, CD28, CD69, CXCR4, FCER1G, FCGR1A, FCGR2A, GNA13, HIF1A, HLA-DQA1, ICOS, IGHM, IGKC, IL2RG, IL7R, ITGB2, JAK3, LYN, PIK3CD, POU2AF1, PRDM1, RAC2, TNFRSF1B, TNFSF13B, TRA@, VAV1                                                                                                                               | 29 |
| Humoral Immune Response        | quantity        | quantity of plasma cells         | 1,29E-07 | ICOS, IL7R, ITGB2, PRDM1, RAC2, TNFRSF1B, TNFSF13B                                                                                                                                                                                                                                                                                     | 7  |
| Humoral Immune Response        | activation      | activation of B lymphocytes      | 7,97E-11 | BTK, C1QA, CD86, CD8A, FAS, IGHG1, IGHM, LAT2, LAX1, LYN, PIK3CD, POU2AF1, PTPRC, TLR4, TNFRSF17, TNFSF13B, VAV1                                                                                                                                                                                                                       | 17 |
| Humoral Immune Response        | development     | development of B lymphocytes     | 3,12E-10 | BTK, CBL, CD69, CXCR4, DCK, HIF1A, IGHM, IL2RG, IL7R, JAK3, LYN, PIK3CD, POU2AF1, PRDM1, TNFSF13B, VAV1                                                                                                                                                                                                                                | 16 |
| Humoral Immune Response        | formation       | formation of germinal center     | 2,41E-08 | CD28, ICOS, KLHL6, LAX1, PIK3CD, POU2AF1, PRDM1, SH2D1A, TNFSF13B, VAV1                                                                                                                                                                                                                                                                | 10 |
| Humoral Immune Response        | differentiation | differentiation of B lymphocytes | 3,90E-08 | CXCR4, DUSP5, HDAC9 (includes EG:9734), ICOS, IGHM, IKZF1, IL2RB, IL2RG, IL7R, IRF4, PIK3CD, POU2AF1, PRDM1, PTPRC, TLR4, TLR7, TNFSF13B                                                                                                                                                                                               | 17 |
| Humoral Immune Response        | differentiation | differentiation of plasma cells  | 1,68E-06 | CXCR4, DUSP5, ICOS, IRF4, POU2AF1, PRDM1, TNFSF13B                                                                                                                                                                                                                                                                                     | 7  |
| Humoral Immune Response        | cell            | cell movement                    | 5,22E-08 | CCL19, CCL21, CCR2, CXCL9, PIK3CD, POU2AF1, RAC2, RGS1, SELPLG,                                                                                                                                                                                                                                                                        | 10 |



|                                 |                             |                                     |          |                                                                                                                                                                                                                                                                                                                                                                                                                                                                                                                                                                      |    |
|---------------------------------|-----------------------------|-------------------------------------|----------|----------------------------------------------------------------------------------------------------------------------------------------------------------------------------------------------------------------------------------------------------------------------------------------------------------------------------------------------------------------------------------------------------------------------------------------------------------------------------------------------------------------------------------------------------------------------|----|
| Immune Response                 | movement                    | of B lymphocytes                    |          | TLR4                                                                                                                                                                                                                                                                                                                                                                                                                                                                                                                                                                 |    |
| Humoral Immune Response         | homing                      | homing of B lymphocytes             | 1,83E-07 | CCL19, CCL21, CCR2, CXCL9, PIK3CD, RAC2, RGS1, TLR4                                                                                                                                                                                                                                                                                                                                                                                                                                                                                                                  | 8  |
| Humoral Immune Response         | chemotaxis                  | chemotaxis of B lymphocytes         | 1,68E-06 | CCL19, CCL21, CCR2, CXCL9, RAC2, RGS1, TLR4                                                                                                                                                                                                                                                                                                                                                                                                                                                                                                                          | 7  |
| Hematological Disease           | hematological disorder      | hematological disorder              | 3,71E-17 | AHR, BTK, C1QA, CASP1, CBL, CCL2, CCL4, CCL5, CCND2, CCR2, CCR5, CD2, CD28, CD47, CD52, CD86, CD247, CD3D, CD3E, CD3G, CFH, CHEK2, CSF1R, CSF2RB, CTLA4, CTSS, CX3CR1, CXCL9, CXCR4, DCK, ETS1, FAS, FCER1A, FCER1G, FCGR1A, FCGR2A, FCGR3B, FYB, HCLS1, HDAC9 (includes EG:9734), HGF, HIF1A, ICOS, IGHM, IKZF1, IL2RB, IL2RG, IL7R, IRF1, IRF4, IRF8, ITGB2, ITGB6, ITK, JAK3, KLRK1, LCK, LY75, LYN, MMP7, PIK3CD, PLD1, PLSCR1, POLE4, PRF1, PRKCB, PTGER4, RAB27A, RAC2, RRM1 (includes EG:6240), RUNX1, RUNX2, SOCS3, STAT4, STX11, TLR4, TLR7, TNFRSF1B, VAV1 | 79 |
| Hematological Disease           | hematological disorder      | hematological disorder of mammalia  | 5,02E-12 | CASP1, CCND2, CD28, CD47, CD3E, CTLA4, CX3CR1, CXCL9, CXCR4, ETS1, FAS, FCER1G, FCGR1A, FCGR2A, HCLS1, HIF1A, ICOS, IKZF1, IL2RB, IL2RG, IL7R, IRF8, ITGB2, JAK3, LYN, PLSCR1, PRF1, RAC2, RUNX1, SOCS3, STAT4, TLR4, TLR7, TNFRSF1B, VAV1                                                                                                                                                                                                                                                                                                                           | 35 |
| Hematological Disease           | hematological disorder      | hematological disorder of mice      | 1,29E-11 | CASP1, CCND2, CD28, CD47, CD3E, CTLA4, CX3CR1, CXCR4, ETS1, FAS, FCER1G, FCGR1A, FCGR2A, HCLS1, HIF1A, IKZF1, IL2RB, IL2RG, IL7R, IRF8, ITGB2, JAK3, LYN, PLSCR1, PRF1, RAC2, RUNX1, SOCS3, STAT4, TLR4, TLR7, TNFRSF1B, VAV1                                                                                                                                                                                                                                                                                                                                        | 33 |
| Hematological Disease           | lymphocytic leukemia        | lymphocytic leukemia                | 1,10E-08 | CCL4, CD52, CD86, CD247, CD3D, CD3E, CD3G, CSF2RB, CXCR4, DCK, FAS, IKZF1, IL2RB, IL2RG, IRF4, ITGB2, LCK, PRKCB, RRM1 (includes EG:6240), RUNX1, TLR7                                                                                                                                                                                                                                                                                                                                                                                                               | 21 |
| Hematological Disease           | hematologic cancer          | hematologic cancer                  | 1,18E-08 | CBL, CCL4, CD2, CD52, CD86, CD247, CD3D, CD3E, CD3G, CHEK2, CSF1R, CSF2RB, CTLA4, CXCR4, DCK, FAS, HDAC9 (includes EG:9734), IKZF1, IL2RB, IL2RG, IRF4, ITGB2, JAK3, KLRK1, LCK, POLE4, PRKCB, RRM1 (includes EG:6240), RUNX1, RUNX2, TLR7                                                                                                                                                                                                                                                                                                                           | 31 |
| Hematological Disease           | autoimmune hemolytic anemia | autoimmune hemolytic anemia of mice | 1,67E-08 | CD28, CD47, CTLA4, FCGR1A, FCGR2A, IL7R                                                                                                                                                                                                                                                                                                                                                                                                                                                                                                                              | 6  |
| Hematological Disease           | disease                     | disease of leukocytes               | 2,91E-08 | BTK, CASP1, CCL5, CCR2, CCR5, CD86, CXCR4, ICOS, IRF1, ITGAM, LTF, RBL1                                                                                                                                                                                                                                                                                                                                                                                                                                                                                              | 12 |
| Hematological Disease           | leukemia                    | leukemia                            | 4,60E-08 | CBL, CCL4, CD2, CD52, CD86, CD247, CD3D, CD3E, CD3G, CSF1R, CSF2RB, CTLA4, CXCR4, DCK, FAS, HDAC9 (includes EG:9734), IKZF1, IL2RB, IL2RG, IRF4, ITGB2, JAK3, LCK, POLE4, PRKCB, RRM1 (includes EG:6240), RUNX1, TLR7                                                                                                                                                                                                                                                                                                                                                | 28 |
| Hematological Disease           | hemolytic anemia            | hemolytic anemia                    | 2,59E-07 | CD28, CD47, CFH, CTLA4, CX3CR1, FAS, FCGR1A, FCGR2A, IL7R                                                                                                                                                                                                                                                                                                                                                                                                                                                                                                            | 9  |
| Hematological Disease           | eosinophilia                | eosinophilia                        | 3,44E-07 | CD86, CD247, CD3G, CTSS, CXCL9, CXCR4, FCER1A, HGF, IL2RG, IRF8, ITGB6, ITK, LCK, LY75, PRF1                                                                                                                                                                                                                                                                                                                                                                                                                                                                         | 15 |
| Hematological Disease           | acute lymphocytic leukemia  | acute lymphocytic leukemia          | 8,90E-07 | CD52, CD86, CD247, CD3D, CD3E, CD3G, CSF2RB, CXCR4, FAS, IKZF1, LCK, RRM1 (includes EG:6240), RUNX1                                                                                                                                                                                                                                                                                                                                                                                                                                                                  | 13 |
| Hematological Disease           | leukopenia                  | leukopenia                          | 1,24E-06 | ETS1, ICOS, IL7R, JAK3, PIK3CD, TLR4, TLR7                                                                                                                                                                                                                                                                                                                                                                                                                                                                                                                           | 7  |
| Post-Translational Modification | tyrosine phosphorylation    | tyrosine phosphorylation of protein | 4,28E-17 | CBL, CCL4, CCL5, CD2, CD28, CD47, CD48, CD244, CD247, CD3E, CD8A, CLEC4C, CSF1R, CTLA4, FAS, FCER1A, FCER1G, FCGR2A, FCRL3, HCK, IGHM, ITGAM, ITGB2, JAK3, LAX1, LCK, LYN, PTPN22, PTPRA, PTPRC, SH2D1A, TYROBP                                                                                                                                                                                                                                                                                                                                                      | 32 |
| Post-Translational Modification | phosphorylation             | phosphorylation of protein          | 4,23E-15 | AHR, CBL, CCL4, CCL5, CCND2, CD2, CD28, CD47, CD48, CD244, CD247, CD3E, CD8A, CLEC4C, CSF1R, CTLA4, FAS, FCER1A, FCER1G, FCGR2A, FCRL3, HCK, IGHM, ITGAM, ITGB2, JAK3, LAX1, LCK, LYN, PTPN22, PTPRA, PTPRC, SH2D1A, SOCS3, STAT1, TYROBP                                                                                                                                                                                                                                                                                                                            | 36 |

|                                 |                   |                                    |          |                                                                                                                                                                                                                                                                                                                                                                                                                                           |    |
|---------------------------------|-------------------|------------------------------------|----------|-------------------------------------------------------------------------------------------------------------------------------------------------------------------------------------------------------------------------------------------------------------------------------------------------------------------------------------------------------------------------------------------------------------------------------------------|----|
| Post-Translational Modification | moiety attachment | moiety attachment of protein       | 1,86E-08 | AHR, CBL, CCL4, CCL5, CCND2, CD2, CD28, CD47, CD48, CD244, CD247, CD3E, CD8A, CLEC4C, CSF1R, CTLA4, FAS, FCER1A, FCER1G, FCGR2A, FCRL3, HCK, IGHM, ITGAM, ITGB2, JAK3, LAX1, LCK, LYN, MAP3K1, PTPN22, PTPRA, PTPRC, SH2D1A, SOCS3, STAT1, TYROBP                                                                                                                                                                                         | 37 |
| Post-Translational Modification | modification      | modification of protein            | 1,58E-06 | AHR, CASP1, CBL, CCL4, CCL5, CCND2, CD2, CD28, CD47, CD48, CD244, CD247, CD3E, CD8A, CLEC4C, CSF1R, CTLA4, CYBB, DUSP5, FAS, FCER1A, FCER1G, FCGR2A, FCRL3, HCK, HS3ST3B1, IGHM, ITGAM, ITGB2, JAK3, LAX1, LCK, LYN, MAP3K1, PTPN7, PTPN9, PTPN22, PTPRA, PTPRC, PTPRE, SH2D1A, SOCS3, STAT1, TYROBP, UBE2L6                                                                                                                              | 45 |
| Tissue Development              | adhesion          | adhesion of blood cells            | 4,66E-17 | BTK, C1QA, CCL2, CCL4, CCL5, CCL19, CCL21, CD2, CD28, CD47, CD48, CORO1A, CXCL9, FAS, FCER1G, FCGR2A, FYB, GZMB, HCK, HGF, ICOS, IGHM, ITGAL, ITGAM, ITGAX, ITGB2, ITK, LCP1, LYN, PIK3CD, PTPRC, RAC2, RASSF5, RGS1, SELPLG, TLR4, VAV1                                                                                                                                                                                                  | 37 |
| Tissue Development              | adhesion          | adhesion of leukocytes             | 5,56E-17 | BTK, C1QA, CCL2, CCL4, CCL5, CCL19, CCL21, CD2, CD28, CD47, CD48, CORO1A, CXCL9, FAS, FCGR2A, FYB, HCK, HGF, ICOS, ITGAL, ITGAM, ITGAX, ITGB2, ITK, LCP1, LYN, PIK3CD, PTPRC, RAC2, RASSF5, RGS1, SELPLG, TLR4, VAV1                                                                                                                                                                                                                      | 34 |
| Tissue Development              | adhesion          | adhesion of cells                  | 8,88E-17 | AMICA1, BTK, C1ORF38, C1QA, CBL, CCL2, CCL4, CCL5, CCL19, CCL21, CCR2, CCR5, CD2, CD28, CD47, CD48, CD84, CD96, CD8A, CLEC7A, CORO1A, CX3CR1, CXCL9, CXCR4, CYTIP, EMB, ETS1, FAS, FCER1G, FCGR2A, FYB, GZMB, HCK, HGF, HIF1A, ICOS, IGHA1, IGHM, ITGAL, ITGAM, ITGAX, ITGB2, ITGB6, ITK, LCK, LCP1, LTF, LYN, MAP3K1, MYO1F, PARVG, PCDH10, PIK3CD, PLD1, PTPRC, RAC2, RASSF5, RGS1, SELPLG, ST8SIA4, STAT1, STK4, TLR4, TNC, VAV1, VCAN | 66 |
| Tissue Development              | adhesion          | adhesion of normal cells           | 1,07E-16 | AMICA1, BTK, C1QA, CCL2, CCL4, CCL5, CCL19, CCL21, CD2, CD28, CD47, CD48, CD8A, CORO1A, CXCL9, FAS, FCER1G, FCGR2A, FYB, GZMB, HCK, HGF, HIF1A, ICOS, IGHM, ITGAL, ITGAM, ITGAX, ITGB2, ITK, LCP1, LYN, MAP3K1, PIK3CD, PTPRC, RAC2, RASSF5, RGS1, SELPLG, TLR4, TNC, VAV1                                                                                                                                                                | 42 |
| Tissue Development              | adhesion          | adhesion of mononuclear leukocytes | 1,35E-16 | BTK, CCL2, CCL4, CCL5, CCL19, CCL21, CD2, CD28, CD47, CD48, CXCL9, FAS, FYB, HGF, ICOS, ITGAL, ITGAM, ITGAX, ITGB2, ITK, LCP1, RASSF5, RGS1, SELPLG, TLR4, VAV1                                                                                                                                                                                                                                                                           | 26 |
| Tissue Development              | adhesion          | adhesion of eukaryotic cells       | 1,34E-15 | AMICA1, BTK, C1QA, CBL, CCL2, CCL4, CCL5, CCL19, CCL21, CD2, CD28, CD47, CD48, CD8A, CORO1A, CXCL9, CXCR4, CYTIP, ETS1, FAS, FCER1G, FCGR2A, FYB, GZMB, HCK, HGF, HIF1A, ICOS, IGHM, ITGAL, ITGAM, ITGAX, ITGB2, ITK, LCP1, LTF, LYN, MAP3K1, PARVG, PIK3CD, PLD1, PTPRC, RAC2, RASSF5, RGS1, SELPLG, TLR4, TNC, VAV1, VCAN                                                                                                               | 50 |
| Tissue Development              | adhesion          | adhesion of lymphocytes            | 5,88E-14 | BTK, CCL2, CCL4, CCL19, CCL21, CD2, CD28, CD47, CD48, CXCL9, FAS, FYB, HGF, ICOS, ITGAL, ITGB2, ITK, RASSF5, RGS1, SELPLG, TLR4                                                                                                                                                                                                                                                                                                           | 21 |
| Tissue Development              | adhesion          | adhesion of T lymphocytes          | 7,51E-12 | CCL4, CCL19, CCL21, CD2, CD47, CD48, CXCL9, FAS, FYB, HGF, ICOS, ITGAL, ITGB2, ITK, RASSF5, SELPLG, TLR4                                                                                                                                                                                                                                                                                                                                  | 17 |
| Tissue Development              | adhesion          | adhesion of neutrophils            | 4,19E-08 | CORO1A, ITGAL, ITGAM, ITGAX, ITGB2, LCP1, LYN, PIK3CD, SELPLG, TLR4, VAV1                                                                                                                                                                                                                                                                                                                                                                 | 11 |
| Tissue Development              | adhesion          | adhesion of granulocytes           | 3,07E-07 | CORO1A, HCK, ITGAL, ITGAM, ITGAX, ITGB2, LCP1, LYN, PIK3CD, SELPLG, TLR4, VAV1                                                                                                                                                                                                                                                                                                                                                            | 12 |
| Tissue Development              | generation        | generation of leukocytes           | 2,46E-12 | CD28, CD86, HLA-DQB1, ICOS, IL10RA, IL12RB1, IL2RG, IL7R, IRF4, IRF8, ITK, JAK3, LYN, PSMB9, SOCS3, STAT4, TBX21, TLR4, TNFSF13B                                                                                                                                                                                                                                                                                                          | 19 |
| Tissue Development              | generation        | generation of lymphocytes          | 1,15E-11 | CD28, CD86, HLA-DQB1, ICOS, IL10RA, IL12RB1, IL2RG, IL7R, IRF4, ITK, JAK3, PSMB9, SOCS3, STAT4, TBX21, TLR4, TNFSF13B                                                                                                                                                                                                                                                                                                                     | 17 |
| Tissue Development              | generation        | generation of T lymphocytes        | 2,92E-11 | CD28, CD86, HLA-DQB1, ICOS, IL10RA, IL12RB1, IL2RG, ITK, JAK3, PSMB9, SOCS3, STAT4, TBX21, TLR4, TNFSF13B                                                                                                                                                                                                                                                                                                                                 | 15 |
| Tissue Development              | generation        | generation of helper T lymphocytes | 6,36E-07 | CD28, IL12RB1, JAK3, SOCS3, STAT4, TBX21, TNFSF13B                                                                                                                                                                                                                                                                                                                                                                                        | 7  |
| Tissue Development              | generation        | generation of Th1 cells            | 1,02E-06 | CD28, IL12RB1, JAK3, STAT4, TBX21                                                                                                                                                                                                                                                                                                                                                                                                         | 5  |
| Tissue Development              | accumulation      | accumulation of leukocytes         | 1,48E-11 | CCL2, CCL5, CCL21, CCR2, CCR5, CD28, CD86, CD1D, CTLA4, CX3CR1, CXCL9, CYBB, FAS, ICOS, IL10RA, IL2RG, ITGAL, ITGAM, ITGAX, ITGB2, RUNX3, SELPLG, SH2D2A, TLR4                                                                                                                                                                                                                                                                            | 24 |
| Tissue Development              | accumulation      | accumulation of cells              | 7,61E-11 | AHR, CCL2, CCL5, CCL21, CCR2, CCR5, CD28, CD86, CD1D, CTLA4, CX3CR1, CXCL9, CYBB, FAS, HGF, ICOS, IFI16, IL10RA, IL2RG, ITGAL, ITGAM, ITGAX, ITGB2, RAC2, RUNX3, SELPLG, SH2D2A, TLR4                                                                                                                                                                                                                                                     | 28 |
| Tissue Development              | accumulation      | accumulation of lymphocytes        | 2,17E-10 | CCL5, CCL21, CCR5, CD28, CD86, CD1D, CTLA4, FAS, ICOS, IL10RA, IL2RG, ITGAL, ITGB2, RUNX3, SH2D2A                                                                                                                                                                                                                                                                                                                                         | 15 |
| Tissue Development              | accumulation      | accumulation                       | 4,33E-10 | CCL5, CCL21, CCR5, CD28, CD86, CTLA4, FAS, ICOS, IL10RA, IL2RG, ITGAL,                                                                                                                                                                                                                                                                                                                                                                    | 13 |

|                             |                            |                                       |          |                                                                                                                                                                                                                                                                                                                                                                                                                                                                                                                                                                                                                                                                                                                                                                                                                           |     |
|-----------------------------|----------------------------|---------------------------------------|----------|---------------------------------------------------------------------------------------------------------------------------------------------------------------------------------------------------------------------------------------------------------------------------------------------------------------------------------------------------------------------------------------------------------------------------------------------------------------------------------------------------------------------------------------------------------------------------------------------------------------------------------------------------------------------------------------------------------------------------------------------------------------------------------------------------------------------------|-----|
| Development                 | lation                     | of T lymphocytes                      |          | RUNX3, SH2D2A                                                                                                                                                                                                                                                                                                                                                                                                                                                                                                                                                                                                                                                                                                                                                                                                             |     |
| Tissue Development          | accumulation               | accumulation of macrophages           | 8,02E-07 | CCL2, CCL5, CCR2, CD28, CX3CR1, FAS, ITGAM, ITGAX, TLR4                                                                                                                                                                                                                                                                                                                                                                                                                                                                                                                                                                                                                                                                                                                                                                   | 9   |
| Tissue Development          | aggregation                | aggregation of cells                  | 1,09E-10 | BTK, CCL5, CD2, CD47, CP, CXCL9, FCER1G, FCGR2A, GNA13, HCLS1, HGF, HIF1A, IGHM, ITGAL, ITGAM, ITGB2, LCK, LCP2, LTF, LYN, MMP7, PCDH10, PTGER4, PTPRC, RUNX2, SELPLG, TLR4, VAV1                                                                                                                                                                                                                                                                                                                                                                                                                                                                                                                                                                                                                                         | 28  |
| Tissue Development          | aggregation                | aggregation of blood cells            | 5,16E-09 | BTK, CCL5, CD47, CXCL9, FCER1G, FCGR2A, GNA13, HCLS1, HIF1A, IGHM, ITGAL, ITGAM, ITGB2, LCK, LCP2, LYN, PTGER4, SELPLG, TLR4, VAV1                                                                                                                                                                                                                                                                                                                                                                                                                                                                                                                                                                                                                                                                                        | 20  |
| Tissue Development          | aggregation                | aggregation of leukocyte cell lines   | 1,99E-06 | CD2, CD47, ITGAL, ITGAM, ITGB2                                                                                                                                                                                                                                                                                                                                                                                                                                                                                                                                                                                                                                                                                                                                                                                            | 5   |
| Tissue Development          | cell-cell contact          | cell-cell contact of leukocytes       | 1,76E-06 | ITGAL, ITGAM, ITGAX, ITGB2                                                                                                                                                                                                                                                                                                                                                                                                                                                                                                                                                                                                                                                                                                                                                                                                | 4   |
| Connective Tissue Disorders | rheumatic disease          | rheumatic disease                     | 8,79E-16 | AIF1, APAF1, C12ORF35, C1QA, C3AR1, CARD8, CASP1, CCL2, CCL4, CCL5, CCL19, CCL21, CCR2, CCR5, CCR6, CD28, CD53, CD69, CD86, CD3D, CDC7, CELF2, CHEK2, CIITA, CSF2RB, CSMD2, CTLA4, CTSS, CXCL6, CXCL9, CXCR4, FAS, FCER1G, FCGR1A, FCGR2A, FCN1, FCRL3, FLI1, GABBR1, GABRP, GBP2, GIMAP2, GPSM3, GZMA, GZMB, HCK, HCLS1, HLA-DMB, HLA-DOA, HLA-DPA1, HLA-DPB1, HLA-DQA1, HLA-DQB1, HLA-DRA, HLA-E, ICOS, IGHG1, IGHM, IGKC, IGL@, IKZF1, IL10RA, IL2RB, IL7R, ITGAL, ITGAM, ITGB2, JAKMIP1, LCK, LCP1, LST1, LTF, LUM, LY75, LYN, LYZ, MAP4K1, MCTP2, MLLT3, MS4A7, NCF4, NLRP3, P2RY13, PLD1, PRDM1, PRKCB, PSMB9, PTGER4, PTPN22, PTPRC, RNF213, RUNX1, RUNX3, SERPINA3, SH2D1A, SOCS3, SP140, STAT1, STAT4, STK10, TAGAP, TAP1, TBX21, TLR4, TLR7, TMEM156, TNFRSF1B, TNFSF13B, TRA@, UBE2L6, XCL1                    | 111 |
| Connective Tissue Disorders | rheumatic disease          | rheumatic disease of rodents          | 1,12E-14 | CASP1, CCL2, CCL5, CCR2, CD69, CIITA, CTSS, FAS, FCER1G, FCGR1A, FCGR2A, ICOS, IGHG1, IL2RB, LTF, LUM, LYN, PTGER4, SH2D1A, SOCS3, STAT1, STAT4, TAP1, TBX21, TLR4, TNFRSF1B, TNFSF13B                                                                                                                                                                                                                                                                                                                                                                                                                                                                                                                                                                                                                                    | 27  |
| Connective Tissue Disorders | rheumatic disease          | rheumatic disease of mice             | 1,23E-13 | CASP1, CCL2, CCR2, CD69, CIITA, CTSS, FAS, FCER1G, FCGR1A, FCGR2A, ICOS, IGHG1, IL2RB, LTF, LYN, PTGER4, SH2D1A, SOCS3, STAT1, STAT4, TAP1, TBX21, TLR4, TNFRSF1B, TNFSF13B                                                                                                                                                                                                                                                                                                                                                                                                                                                                                                                                                                                                                                               | 25  |
| Connective Tissue Disorders | connective tissue disorder | connective tissue disorder            | 1,57E-15 | AIF1, APAF1, C12ORF35, C1QA, C3AR1, CARD8, CASP1, CCL2, CCL4, CCL5, CCL19, CCL21, CCR2, CCR5, CCR6, CD28, CD53, CD69, CD86, CD96, CD3D, CDC7, CELF2, CHEK2, CIITA, CSF2RB, CSMD2, CTLA4, CTSS, CXCL6, CXCL9, CXCR4, FAS, FCER1G, FCGR1A, FCGR2A, FCN1, FCRL3, FLI1, GABBR1, GABRP, GBP2, GIMAP2, GPSM3, GZMA, GZMB, HCK, HCLS1, HLA-DMB, HLA-DOA, HLA-DPA1, HLA-DPB1, HLA-DQA1, HLA-DQB1, HLA-DRA, HLA-E, ICOS, IGHG1, IGHM, IGKC, IGL@, IKZF1, IL10RA, IL2RB, IL7R, ITGAL, ITGAM, ITGB2, JAKMIP1, LCK, LCP1, LST1, LTF, LUM, LY75, LYN, LYZ, MAP4K1, MCTP2, MLLT3, MMP7, MS4A7, NCF4, NLRP3, P2RY13, PLD1, PRDM1, PRKCB, PSMB9, PTGER4, PTPN22, PTPRC, RNF213, RUNX1, RUNX3, SAMD9, SERPINA3, SH2D1A, SOCS3, SP140, STAT1, STAT4, STK10, TAGAP, TAP1, TBX21, TLR4, TLR7, TMEM156, TNFRSF1B, TNFSF13B, TRA@, UBE2L6, XCL1 | 114 |
| Connective Tissue Disorders | connective tissue disorder | connective tissue disorder of rodents | 3,39E-15 | CASP1, CCL2, CCL5, CCR2, CD69, CIITA, CTLA4, CTSS, FAS, FCER1G, FCGR1A, FCGR2A, ICOS, IGHG1, IL2RB, LTF, LUM, LYN, PTGER4, SH2D1A, SOCS3, STAT1, STAT4, TAP1, TBX21, TLR4, TNFRSF1B, TNFSF13B                                                                                                                                                                                                                                                                                                                                                                                                                                                                                                                                                                                                                             | 28  |
| Connective Tissue Disorders | connective tissue disorder | connective tissue disorder of mice    | 3,73E-14 | CASP1, CCL2, CCR2, CD69, CIITA, CTLA4, CTSS, FAS, FCER1G, FCGR1A, FCGR2A, ICOS, IGHG1, IL2RB, LTF, LYN, PTGER4, SH2D1A, SOCS3, STAT1, STAT4, TAP1, TBX21, TLR4, TNFRSF1B, TNFSF13B                                                                                                                                                                                                                                                                                                                                                                                                                                                                                                                                                                                                                                        | 26  |
| Connective Tissue Disorders | arthritis                  | arthritis                             | 3,35E-15 | AIF1, APAF1, C12ORF35, C1QA, C3AR1, CARD8, CASP1, CCL2, CCL4, CCL5, CCL19, CCL21, CCR2, CCR5, CCR6, CD28, CD53, CD69, CD86, CD3D, CDC7, CELF2, CHEK2, CIITA, CSF2RB, CSMD2, CTLA4, CTSS, CXCL6, CXCL9, CXCR4, FAS, FCER1G, FCGR1A, FCGR2A, FCN1, FCRL3, FLI1, GABBR1, GABRP, GBP2, GIMAP2, GPSM3, GZMA, GZMB, HCK, HCLS1, HLA-DMB, HLA-DOA, HLA-DPA1, HLA-DPB1, HLA-DQA1, HLA-DQB1, HLA-DRA, HLA-E, ICOS, IGHG1, IGHM, IGKC, IGL@, IKZF1, IL10RA, IL2RB, IL7R, ITGAL,                                                                                                                                                                                                                                                                                                                                                     | 107 |

|                                 |                                  |                                          |          |                                                                                                                                                                                                                                                                                                                                                                                                                                                                                                                                                                                                                                                             |     |
|---------------------------------|----------------------------------|------------------------------------------|----------|-------------------------------------------------------------------------------------------------------------------------------------------------------------------------------------------------------------------------------------------------------------------------------------------------------------------------------------------------------------------------------------------------------------------------------------------------------------------------------------------------------------------------------------------------------------------------------------------------------------------------------------------------------------|-----|
| Connective Tissue Disorders     | arthritis                        | arthritis of rodents                     | 1,11E-12 | ITGB2, JAKMIP1, LCP1, LST1, LTF, LUM, LY75, LYN, LYZ, MAP4K1, MCTP2, MLLT3, MS4A7, NCF4, NLRP3, P2RY13, PLD1, PRDM1, PRKCB, PSMB9, PTGER4, PTPN22, PTPRC, RNF213, RUNX1, RUNX3, SERPINA3, SOCS3, SP140, STAT1, STAT4, STK10, TAGAP, TAP1, TBX21, TLR4, TMEM156, TNFRSF1B, TNFSF13B, TRA@, UBE2L6, XCL1                                                                                                                                                                                                                                                                                                                                                      | 24  |
| Connective Tissue Disorders     | arthritis                        | arthritis of mice                        | 1,20E-11 | CASP1, CCL2, CCR2, CD69, CIITA, CTSS, FAS, FCER1G, FCGR1A, FCGR2A, ICOS, IGHG1, IL2RB, LTF, LUM, PTGER4, SOCS3, STAT1, STAT4, TBX21, TLR4, TNFRSF1B, TNFSF13B                                                                                                                                                                                                                                                                                                                                                                                                                                                                                               | 22  |
| Connective Tissue Disorders     | rheumatoid arthritis             | rheumatoid arthritis                     | 1,26E-11 | AIF1, C12ORF35, C1QA, C3AR1, CARD8, CCL2, CCL4, CCL5, CCL19, CCL21, CCR2, CCR5, CCR6, CD28, CD53, CD69, CD86, CD3D, CDC7, CELF2, CHEK2, CIITA, CSF2RB, CSMD2, CTLA4, CXCL6, CXCL9, CXCR4, FCGR2A, FCN1, FCRL3, FLI1, GABBR1, GABRP, GBP2, GIMAP2, GPSM3, GZMA, GZMB, HCK, HCLS1, HLA-DMB, HLA-DOA, HLA-DPA1, HLA-DPB1, HLA-DQA1, HLA-DQB1, HLA-DRA, ICOS, IGHG1, IGHM, IGL@, IKZF1, IL10RA, IL2RB, IL7R, ITGAL, ITGB2, JAKMIP1, LCP1, LST1, LTF, LY75, LYZ, MLLT3, MS4A7, NCF4, P2RY13, PLD1, PRDM1, PSMB9, PTGER4, PTPN22, PTPRC, RNF213, RUNX1, SERPINA3, SOCS3, SP140, STAT1, STAT4, STK10, TAGAP, TAP1, TLR4, TMEM156, TNFRSF1B, TNFSF13B, UBE2L6, XCL1 | 90  |
| Connective Tissue Disorders     | experimentally induced arthritis | experimentally induced arthritis         | 1,81E-10 | CCL4, CCR2, CCR5, CD69, CTLA4, CTSS, FAS, FCGR1A, FCGR2A, ICOS, IGHG1, IL2RB, PTGER4, STAT1, STAT4, TBX21, TLR4, TNFRSF1B, TNFSF13B                                                                                                                                                                                                                                                                                                                                                                                                                                                                                                                         | 19  |
| Connective Tissue Disorders     | experimentally induced arthritis | experimentally induced arthritis of mice | 8,77E-10 | CCR2, CD69, CTSS, FAS, FCGR1A, FCGR2A, ICOS, IGHG1, IL2RB, PTGER4, STAT1, STAT4, TBX21, TLR4, TNFRSF1B, TNFSF13B                                                                                                                                                                                                                                                                                                                                                                                                                                                                                                                                            | 16  |
| Connective Tissue Disorders     | collagen-induced arthritis       | collagen-induced arthritis of mice       | 1,05E-09 | CCR2, CD69, CTSS, FAS, ICOS, IGHG1, IL2RB, PTGER4, STAT1, STAT4, TBX21, TLR4, TNFRSF1B, TNFSF13B                                                                                                                                                                                                                                                                                                                                                                                                                                                                                                                                                            | 14  |
| Connective Tissue Disorders     | collagen-induced arthritis       | collagen-induced arthritis               | 1,22E-09 | CCR2, CD69, CTLA4, CTSS, FAS, ICOS, IGHG1, IL2RB, PTGER4, STAT1, STAT4, TBX21, TLR4, TNFRSF1B, TNFSF13B                                                                                                                                                                                                                                                                                                                                                                                                                                                                                                                                                     | 15  |
| Connective Tissue Disorders     | systemic lupus erythematosus     | systemic lupus erythematosus             | 8,70E-08 | C1QA, CD86, FAS, FCGR2A, HLA-DRA, ICOS, IL7R, ITGAM, LYN, PTPN22, PTPRC, SH2D1A, STAT4, TAP1, TNFSF13B                                                                                                                                                                                                                                                                                                                                                                                                                                                                                                                                                      | 15  |
| Connective Tissue Disorders     | psoriatic arthritis              | psoriatic arthritis                      | 1,66E-07 | APAF1, CXCL9, HLA-E, IGHG1, IGHM, IGKC, ITGAL, LYN, MAP4K1, PRKCB, RUNX3, TNFRSF1B                                                                                                                                                                                                                                                                                                                                                                                                                                                                                                                                                                          | 12  |
| Skeletal and Muscular Disorders | rheumatic disease                | rheumatic disease                        | 8,79E-16 | AIF1, APAF1, C12ORF35, C1QA, C3AR1, CARD8, CASP1, CCL2, CCL4, CCL5, CCL19, CCL21, CCR2, CCR5, CCR6, CD28, CD53, CD69, CD86, CD3D, CDC7, CELF2, CHEK2, CIITA, CSF2RB, CSMD2, CTLA4, CTSS, CXCL6, CXCL9, CXCR4, FAS, FCER1G, FCGR1A, FCGR2A, FCN1, FCRL3, FLI1, GABBR1, GABRP, GBP2, GIMAP2, GPSM3, GZMA, GZMB, HCK, HCLS1, HLA-DMB, HLA-DOA, HLA-DPA1, HLA-DPB1, HLA-DQA1, HLA-DQB1, HLA-DRA, HLA-E, ICOS, IGHG1, IGHM, IGKC, IGL@, IKZF1, IL10RA, IL2RB, IL7R, ITGAL, ITGAM, ITGB2, JAKMIP1, LCK, LCP1, LST1, LTF, LUM, LY75, LYN, LYZ, MAP4K1, MCTP2, MLLT3, MS4A7, NCF4, NLRP3, P2RY13, PLD1, PRDM1,                                                      | 111 |

|                                 |                                |                                           |          |                                                                                                                                                                                                                                                                                                                                                                                                                                                                                                                                                                                                                                                                                                                                                                                                                                                                                                                                                                                                         |     |
|---------------------------------|--------------------------------|-------------------------------------------|----------|---------------------------------------------------------------------------------------------------------------------------------------------------------------------------------------------------------------------------------------------------------------------------------------------------------------------------------------------------------------------------------------------------------------------------------------------------------------------------------------------------------------------------------------------------------------------------------------------------------------------------------------------------------------------------------------------------------------------------------------------------------------------------------------------------------------------------------------------------------------------------------------------------------------------------------------------------------------------------------------------------------|-----|
|                                 |                                |                                           |          | PRKCB, PSMB9, PTGER4, PTPN22, PTPRC, RNF213, RUNX1, RUNX3, SERPINA3, SH2D1A, SOCS3, SP140, STAT1, STAT4, STK10, TAGAP, TAP1, TBX21, TLR4, TLR7, TMEM156, TNFRSF1B, TNFSF13B, TRA@, UBE2L6, XCL1                                                                                                                                                                                                                                                                                                                                                                                                                                                                                                                                                                                                                                                                                                                                                                                                         |     |
| Skeletal and Muscular Disorders | rheumatic disease              | rheumatic disease of rodents              | 1,12E-14 | CASP1, CCL2, CCL5, CCR2, CD69, CIITA, CTSS, FAS, FCER1G, FCGR1A, FCGR2A, ICOS, IGHG1, IL2RB, LTF, LUM, LYN, PTGER4, SH2D1A, SOCS3, STAT1, STAT4, TAP1, TBX21, TLR4, TNFRSF1B, TNFSF13B                                                                                                                                                                                                                                                                                                                                                                                                                                                                                                                                                                                                                                                                                                                                                                                                                  | 27  |
| Skeletal and Muscular Disorders | rheumatic disease              | rheumatic disease of mice                 | 1,23E-13 | CASP1, CCL2, CCR2, CD69, CIITA, CTSS, FAS, FCER1G, FCGR1A, FCGR2A, ICOS, IGHG1, IL2RB, LTF, LYN, PTGER4, SH2D1A, SOCS3, STAT1, STAT4, TAP1, TBX21, TLR4, TNFRSF1B, TNFSF13B                                                                                                                                                                                                                                                                                                                                                                                                                                                                                                                                                                                                                                                                                                                                                                                                                             | 25  |
| Skeletal and Muscular Disorders | arthritis                      | arthritis                                 | 3,35E-15 | AIF1, APAF1, C12ORF35, C1QA, C3AR1, CARD8, CASP1, CCL2, CCL4, CCL5, CCL19, CCL21, CCR2, CCR5, CCR6, CD28, CD53, CD69, CD86, CD3D, CDC7, CELF2, CHEK2, CIITA, CSF2RB, CSMD2, CTLA4, CTSS, CXCL6, CXCL9, CXCR4, FAS, FCER1G, FCGR1A, FCGR2A, FCN1, FCRL3, FLI1, GABBR1, GABRP, GBP2, GIMAP2, GPSM3, GZMA, GZMB, HCK, HCLS1, HLA-DMB, HLA-DOA, HLA-DPA1, HLA-DPB1, HLA-DQA1, HLA-DQB1, HLA-DRA, HLA-E, ICOS, IGHG1, IGHM, IGKC, IGL@, IKZF1, IL10RA, IL2RB, IL7R, ITGAL, ITGB2, JAKMIP1, LCP1, LST1, LTF, LUM, LY75, LYN, LYZ, MAP4K1, MCTP2, MLLT3, MS4A7, NCF4, NLRP3, P2RY13, PLD1, PRDM1, PRKCB, PSMB9, PTGER4, PTPN22, PTPRC, RNF213, RUNX1, RUNX3, SERPINA3, SOCS3, SP140, STAT1, STAT4, STK10, TAGAP, TAP1, TBX21, TLR4, TMEM156, TNFRSF1B, TNFSF13B, TRA@, UBE2L6, XCL1                                                                                                                                                                                                                            | 107 |
| Skeletal and Muscular Disorders | arthritis                      | arthritis of rodents                      | 1,11E-12 | CASP1, CCL2, CCL5, CCR2, CD69, CIITA, CTSS, FAS, FCER1G, FCGR1A, FCGR2A, ICOS, IGHG1, IL2RB, LTF, LUM, PTGER4, SOCS3, STAT1, STAT4, TBX21, TLR4, TNFRSF1B, TNFSF13B                                                                                                                                                                                                                                                                                                                                                                                                                                                                                                                                                                                                                                                                                                                                                                                                                                     | 24  |
| Skeletal and Muscular Disorders | arthritis                      | arthritis of mice                         | 1,20E-11 | CASP1, CCL2, CCR2, CD69, CIITA, CTSS, FAS, FCER1G, FCGR1A, FCGR2A, ICOS, IGHG1, IL2RB, LTF, PTGER4, SOCS3, STAT1, STAT4, TBX21, TLR4, TNFRSF1B, TNFSF13B                                                                                                                                                                                                                                                                                                                                                                                                                                                                                                                                                                                                                                                                                                                                                                                                                                                | 22  |
| Skeletal and Muscular Disorders | skeletal and muscular disorder | skeletal and muscular disorder of rodents | 1,83E-13 | CASP1, CCL2, CCL5, CCR2, CD69, CD86, CIITA, CSF1R, CTSS, FAS, FCER1G, FCGR1A, FCGR2A, FHL2, ICOS, IGHG1, IL2RB, ITGB2, LTF, LUM, LYN, PTGER4, RUNX2, SH2D1A, SOCS3, STAT1, STAT4, TAP1, TBX21, TLR4, TNFRSF1B, TNFSF13B                                                                                                                                                                                                                                                                                                                                                                                                                                                                                                                                                                                                                                                                                                                                                                                 | 32  |
| Skeletal and Muscular Disorders | skeletal and muscular disorder | skeletal and muscular disorder of mice    | 9,74E-13 | CASP1, CCL2, CCR2, CD69, CD86, CIITA, CSF1R, CTSS, FAS, FCER1G, FCGR1A, FCGR2A, FHL2, ICOS, IGHG1, IL2RB, ITGB2, LTF, LYN, PTGER4, RUNX2, SH2D1A, SOCS3, STAT1, STAT4, TAP1, TBX21, TLR4, TNFRSF1B, TNFSF13B                                                                                                                                                                                                                                                                                                                                                                                                                                                                                                                                                                                                                                                                                                                                                                                            | 30  |
| Skeletal and Muscular Disorders | skeletal and muscular disorder | skeletal and muscular disorder            | 5,46E-10 | AIF1, APAF1, BASP1, BCL11B, BTK, C12ORF35, C1QA, C3AR1, CARD8, CASP1, CCL2, CCL4, CCL5, CCL19, CCL21, CCR2, CCR5, CCR6, CD28, CD52, CD53, CD69, CD86, CD96, CD1E, CD3D, CDC7, CELF2, CHEK2, CIITA, CP, CSF1R, CSF2RB, CSMD2, CTLA4, CTSS, CXCL6, CXCL9, CXCR4, CYTH4, DCK, DUSP5, EVI2B, FAS, FCER1G, FCGR1A, FCGR2A, FCN1, FCRL3, FHL2, FLI1, GABBR1, GABRP, GBP2, GBP1 (includes EG:2633), GIMAP2, GPSM3, GZMA, GZMB, HCK, HCLS1, HLA-DMB, HLA-DOA, HLA-DPA1, HLA-DPB1, HLA-DQA1, HLA-DQB1, HLA-DRA, HLA-E, HLA-F, ICOS, IDO1, IGHG1, IGHM, IGKC, IGL@, IKZF1, IL10RA, IL2RB, IL7R, IRF8, ITGAL, ITGAM, ITGB2, ITGB6, JAKMIP1, KIAA1199, KLRB1, LCK, LCP1, LST1, LTF, LUM, LY75, LY96, LYN, LYZ, MAP4K1, MCTP2, MLLT3, MS4A7, NCF4, NLRP3, P2RY13, PLD1, PRDM1, PRKCB, PSMB9, PTGDR, PTGER4, PTPN22, PTPRC, RNF213, RTN1, RUNX1, RUNX2, RUNX3, SERPINA3, SH2D1A, SOCS3, SP140, STAT1, STAT4, STK10, TAGAP, TAP1, TBX21, TLR4, TLR7, TMEM156, TNFRSF1B, TNFSF13B, TNIP3, TOX, TRA@, UBE2L6, VCAN, XCL1 | 138 |
| Skeletal and Muscular Disorders | rheumatoid arthritis           | rheumatoid arthritis                      | 1,26E-11 | AIF1, C12ORF35, C1QA, C3AR1, CARD8, CCL2, CCL4, CCL5, CCL19, CCL21, CCR2, CCR5, CCR6, CD28, CD53, CD69, CD86, CD3D, CDC7, CELF2, CHEK2, CIITA, CSF2RB, CSMD2, CTLA4, CXCL6, CXCL9, CXCR4, FCGR2A, FCN1, FCRL3, FLI1, GABBR1, GABRP, GBP2, GIMAP2, GPSM3, GZMA, GZMB, HCK, HCLS1, HLA-DMB, HLA-DOA, HLA-DPA1, HLA-DPB1, HLA-DQA1, HLA-DQB1, HLA-DRA, ICOS, IGHG1, IGHM, IGL@, IKZF1, IL10RA, IL2RB, IL7R, ITGAL, ITGB2, JAKMIP1, LCP1, LST1, LTF, LY75, LYZ, MLLT3, MS4A7, NCF4, P2RY13, PLD1, PRDM1, PSMB9, PTGER4, PTPN22, PTPRC, RNF213, RUNX1, SERPINA3, SOCS3, SP140, STAT1, STAT4, STK10, TAGAP,                                                                                                                                                                                                                                                                                                                                                                                                   | 90  |

|                                        |                                  |                                          |          |                                                                                                                                                                                                                                                                                                                                                                                                                                                         |    |
|----------------------------------------|----------------------------------|------------------------------------------|----------|---------------------------------------------------------------------------------------------------------------------------------------------------------------------------------------------------------------------------------------------------------------------------------------------------------------------------------------------------------------------------------------------------------------------------------------------------------|----|
|                                        |                                  |                                          |          | TAP1, TLR4, TMEM156, TNFRSF1B, TNFSF13B, UBE2L6, XCL1                                                                                                                                                                                                                                                                                                                                                                                                   |    |
| Skeletal and Muscular Disorders        | experimentally-induced arthritis | experimentally-induced arthritis         | 1,81E-10 | CCL4, CCR2, CCR5, CD69, CTLA4, CTSS, FAS, FCGR1A, FCGR2A, ICOS, IGHG1, IL2RB, PTGER4, STAT1, STAT4, TBX21, TLR4, TNFRSF1B, TNFSF13B                                                                                                                                                                                                                                                                                                                     | 19 |
| Skeletal and Muscular Disorders        | experimentally-induced arthritis | experimentally-induced arthritis of mice | 8,77E-10 | CCR2, CD69, CTSS, FAS, FCGR1A, FCGR2A, ICOS, IGHG1, IL2RB, PTGER4, STAT1, STAT4, TBX21, TLR4, TNFRSF1B, TNFSF13B                                                                                                                                                                                                                                                                                                                                        | 16 |
| Skeletal and Muscular Disorders        | collagen-induced arthritis       | collagen-induced arthritis of mice       | 1,05E-09 | CCR2, CD69, CTSS, FAS, ICOS, IGHG1, IL2RB, PTGER4, STAT1, STAT4, TBX21, TLR4, TNFRSF1B, TNFSF13B                                                                                                                                                                                                                                                                                                                                                        | 14 |
| Skeletal and Muscular Disorders        | collagen-induced arthritis       | collagen-induced arthritis               | 1,22E-09 | CCR2, CD69, CTLA4, CTSS, FAS, ICOS, IGHG1, IL2RB, PTGER4, STAT1, STAT4, TBX21, TLR4, TNFRSF1B, TNFSF13B                                                                                                                                                                                                                                                                                                                                                 | 15 |
| Skeletal and Muscular Disorders        | systemic lupus erythematosus     | systemic lupus erythematosus             | 8,70E-08 | C1QA, CD86, FAS, FCGR2A, HLA-DRA, ICOS, IL7R, ITGAM, LYN, PTPN22, PTPRC, SH2D1A, STAT4, TAP1, TNFSF13B                                                                                                                                                                                                                                                                                                                                                  | 15 |
| Skeletal and Muscular Disorders        | psoriatic arthritis              | psoriatic arthritis                      | 1,66E-07 | APAF1, CXCL9, HLA-E, IGHG1, IGHM, IGKC, ITGAL, LYN, MAP4K1, PRKCB, RUNX3, TNFRSF1B                                                                                                                                                                                                                                                                                                                                                                      | 12 |
| Dermatological Diseases and Conditions | dermatological disorder          | dermatological disorder                  | 1,81E-15 | AHR, APAF1, CASP1, CCL4, CCL5, CCR6, CD2, CD28, CD47, CD52, CD86, CD1B, CD1D, CSF1R, CSF2RB, CTLA4, CXCL9, CXCR4, DSG1, DUSP5, FAS, FCER1A, FCER1G, FCGR1A, FCGR2A, GABBR1, HDAC9 (includes EG:9734), HGF, HIF1A, HLA-DQA1, HLA-DRA, HLA-E, IGHG1, IGHM, IGK@, IGKC, IGL@, IL12RB1, IL2RB, IL2RG, ITGAL, ITGB2, LCK, LCP2, LEF1, LY86, LYN, MAP4K1, MMP7, NFKBIZ, PIK3CD, PRKCB, RGS1, RUNX3, SOCS3, STAT1, STAT4, TLR4, TLR7, TMC8, TNFRSF17, TNFRSF1B | 62 |
| Dermatological Diseases and Conditions | dermatological disorder          | dermatological disorder of mammalia      | 4,99E-07 | CASP1, CD1D, CTLA4, DSG1, FCGR1A, FCGR2A, IGHG1, IGHM, IGKC, ITGAL, ITGB2, PIK3CD, STAT4, TNFRSF1B                                                                                                                                                                                                                                                                                                                                                      | 14 |
| Dermatological Diseases and Conditions | dermatitis                       | dermatitis                               | 7,10E-12 | CASP1, CCL5, CD2, CD52, CD1D, CXCR4, DUSP5, FCER1A, FCER1G, HDAC9 (includes EG:9734), HLA-DQA1, HLA-DRA, IGHM, IGKC, IL2RB, IL2RG, ITGAL, ITGB2, LCP2, NFKBIZ, PIK3CD, SOCS3, STAT1, TLR4                                                                                                                                                                                                                                                               | 24 |
| Dermatological Diseases and Conditions | leprosy                          | leprosy                                  | 1,80E-10 | CCL4, CCR6, CD28, CD47, CD1B, FCER1A, FCER1G, FCGR2A, IGHM, IGK@, IGL@, IL12RB1, IL2RB, IL2RG, LY86, TNFRSF17                                                                                                                                                                                                                                                                                                                                           | 16 |
| Dermatological Diseases and Conditions | lepromatous leprosy              | lepromatous leprosy                      | 1,35E-08 | CCL4, CD47, FCER1G, FCGR2A, IGHM, IGK@, IGL@, IL2RB, IL2RG, LY86, TNFRSF17                                                                                                                                                                                                                                                                                                                                                                              | 11 |
| Dermatological Diseases and Conditions | psoriatic arthritis              | psoriatic arthritis                      | 1,66E-07 | APAF1, CXCL9, HLA-E, IGHG1, IGHM, IGKC, ITGAL, LYN, MAP4K1, PRKCB, RUNX3, TNFRSF1B                                                                                                                                                                                                                                                                                                                                                                      | 12 |
| Dermatological Diseases                | contact dermat                   | contact dermatitis                       | 1,00E-06 | CD1D, FCER1G, IGHM, IGKC, ITGB2, LCP2, PIK3CD, TLR4                                                                                                                                                                                                                                                                                                                                                                                                     | 8  |

|                     |                                   |                                        |          |                                                                                                                                                                                                                                                                                                                                                          |    |  |
|---------------------|-----------------------------------|----------------------------------------|----------|----------------------------------------------------------------------------------------------------------------------------------------------------------------------------------------------------------------------------------------------------------------------------------------------------------------------------------------------------------|----|--|
| and Conditions      | itis                              |                                        |          |                                                                                                                                                                                                                                                                                                                                                          |    |  |
| Cellular Compromise | degranulation                     | degranulation of eukaryotic cells      | 3,78E-15 | BTK, C3AR1, CCL4, CD300A, CTLA4, FCER1A, FCER1G, FCGR2A, FCGR3B, HCK, ITGAM, ITGB2, ITK, KLRK1, LAT2, LAX1, LCP2, LYN, PIK3CD, PLD1, PLSCR1, RAB27A, RAC2, VAV1                                                                                                                                                                                          | 24 |  |
| Cellular Compromise | degranulation                     | degranulation of mast cells            | 4,03E-13 | BTK, C3AR1, CD300A, CTLA4, FCER1A, FCER1G, HCK, ITK, LAT2, LAX1, LCP2, LYN, PIK3CD, PLD1, RAC2, VAV1                                                                                                                                                                                                                                                     | 16 |  |
| Cellular Compromise | respiratory burst                 | respiratory burst                      | 7,54E-12 | CCL2, CYBB, FCER1A, FCER1G, HCK, IGHA1, IRF8, ITGAL, ITGAM, ITGAX, ITGB2, LTF, LYN, NCF2, PTPRC, TYROBP                                                                                                                                                                                                                                                  | 16 |  |
| Cellular Compromise | respiratory burst                 | respiratory burst of leukocytes        | 1,15E-10 | CCL2, FCER1A, FCER1G, HCK, IGHA1, IRF8, ITGAL, ITGAM, ITGAX, ITGB2, LYN, PTPRC, TYROBP                                                                                                                                                                                                                                                                   | 13 |  |
| Cellular Compromise | respiratory burst                 | respiratory burst of myeloid cells     | 2,09E-09 | FCER1A, FCER1G, HCK, IGHA1, ITGAL, ITGAM, ITGAX, ITGB2, LYN, PTPRC, TYROBP                                                                                                                                                                                                                                                                               | 11 |  |
| Cellular Compromise | respiratory burst                 | respiratory burst of phagocytes        | 2,09E-09 | FCER1A, FCER1G, HCK, IGHA1, IRF8, ITGAL, ITGAM, ITGAX, ITGB2, LYN, TYROBP                                                                                                                                                                                                                                                                                | 11 |  |
| Cellular Compromise | respiratory burst                 | respiratory burst of neutrophils       | 7,59E-09 | FCER1A, FCER1G, HCK, IGHA1, ITGAL, ITGAM, ITGAX, ITGB2, LYN, TYROBP                                                                                                                                                                                                                                                                                      | 10 |  |
| Cellular Compromise | depletion                         | depletion of mononuclear leukocytes    | 1,56E-07 | CCR2, CTLA4, CXCR4, EOMES, FAS, IL2RB, TBX21, TNFRSF1B, TNFSF13B                                                                                                                                                                                                                                                                                         | 9  |  |
| Cellular Compromise | depletion                         | depletion of lymphocytes               | 1,63E-06 | CTLA4, CXCR4, EOMES, FAS, IL2RB, TBX21, TNFRSF1B, TNFSF13B                                                                                                                                                                                                                                                                                               | 8  |  |
| Cellular Compromise | deletion                          | deletion of cells                      | 2,50E-07 | CD2, CD28, CD86, CD244, CTLA4, FAS, ICOS, IRF4                                                                                                                                                                                                                                                                                                           | 8  |  |
| Respiratory Disease | respiratory disorder              | respiratory disorder of mice           | 2,34E-14 | CCL2, CCL5, CCL19, CCL21, CCR2, CCR5, CD86, CD1D, CIITA, CTSS, CXCR4, CYBB, GZMB, HGF, HLA-DRA, ICOS, IGHG1, IL2RB, ITGB6, ITK, MX2, RUNX3, SOCS3, STAT1, STAT4, TBX21, TLR4                                                                                                                                                                             | 27 |  |
| Respiratory Disease | respiratory disorder              | respiratory disorder                   | 1,09E-12 | ARL4C, C3AR1, CASP1, CCL2, CCL5, CCL19, CCL21, CCR2, CCR5, CD86, CD247, CD1D, CD3E, CD8A, CIITA, CSF2RB, CTSS, CX3CR1, CXCR4, CYBB, GZMB, HCK, HGF, HIF1A, HLA-DRA, ICOS, IGHG1, IGJ, IL10RA, IL2RB, IRF8, ITGAM, ITGB2, ITGB6, ITK, LCK, LEF1, LTF, LYZ, MMP7, MNDA, MX2, PTGDR, PTGER4, PTPRC, RUNX3, SLC2A3, SOCS3, STAT1, STAT4, TBX21, TLR4, TXNDC3 | 53 |  |
| Respiratory Disease | airway hyperresponsiveness        | airway hyperresponsiveness of organism | 1,89E-09 | C3AR1, CD86, CD1D, CXCR4, HGF, ICOS, IGHG1, IL2RB, ITK, RUNX3, SOCS3, STAT4, TBX21, TLR4                                                                                                                                                                                                                                                                 | 14 |  |
| Respiratory Disease | airway hyperresponsiveness        | airway hyperresponsiveness of mice     | 5,02E-09 | CD86, CD1D, CXCR4, HGF, ICOS, IGHG1, IL2RB, ITK, RUNX3, SOCS3, STAT4, TBX21, TLR4                                                                                                                                                                                                                                                                        | 13 |  |
| Respiratory Disease | severe acute respiratory syndrome | severe acute respiratory syndrome      | 2,48E-07 | ARL4C, C3AR1, CD247, CD3E, CSF2RB, IL10RA, IRF8, ITGAM, ITK, LCK, LEF1, LTF, MNDA, SLC2A3, STAT4                                                                                                                                                                                                                                                         | 15 |  |
| Respiratory Disease | disease                           | disease of lung                        | 1,67E-06 | AHR, CCR2, CD86, CD8A, FAS, HCK, ICOS, IRF1, ITGB6, ITK, LYZ, MMP7, PRF1, STAT1, TLR4                                                                                                                                                                                                                                                                    | 15 |  |
| Organismal Survival | survival                          | survival of organism                   | 3,50E-14 | AHR, BCL2A1, CCL2, CCL21, CCND2, CCR2, CCR5, CD2, CD48, CDC7, CHEK2, CTLA4, CXCL9, CYBB, FAS, FLI1, GNA13, HGF, HLA-DRA, IDO1, IFI16, IGHM, IGK@, IKZF1, IL7R, ITGAL, ITGAM, ITGB6, ITK, LY96, LYZ, NLRP3, PRF1, PRKCB, PTGER4, PTGES, PTPRC, RBL1, SOCS3, STAT1, STAT4, TAP1, TLR4, TNFRSF1B                                                            | 44 |  |
| Organismal Survival | survival                          | survival of rodents                    | 1,12E-12 | BCL2A1, CCL2, CCL21, CCND2, CCR2, CCR5, CD2, CDC7, CHEK2, CTLA4, CXCL9, CYBB, FAS, FLI1, GNA13, HGF, HLA-DRA, IDO1, IFI16, IGHM, IGK@, IKZF1, IL7R, ITGAL, ITGAM, ITK, LY96, NLRP3, PRF1, PRKCB, PTGER4, PTGES, PTPRC, RBL1, SOCS3, STAT1, STAT4, TAP1, TLR4, TNFRSF1B                                                                                   | 40 |  |

|                           |                                   |                                        |          |                                                                                                                                                                                                                                                                                                                                                                                                                                                                                                                                                                                                                                                          |    |
|---------------------------|-----------------------------------|----------------------------------------|----------|----------------------------------------------------------------------------------------------------------------------------------------------------------------------------------------------------------------------------------------------------------------------------------------------------------------------------------------------------------------------------------------------------------------------------------------------------------------------------------------------------------------------------------------------------------------------------------------------------------------------------------------------------------|----|
| Organismal Survival       | survival                          | survival of mammalia                   | 1,33E-12 | BCL2A1, CCL2, CCL21, CCND2, CCR2, CCR5, CD2, CDC7, CHEK2, CTLA4, CXCL9, CYBB, FAS, FLI1, GNA13, HGF, HLA-DRA, IDO1, IFI16, IGHM, IGK@, IKZF1, IL7R, ITGAL, ITGAM, ITGB6, ITK, LY96, NLRP3, PRF1, PRKCB, PTGER4, PTGES, PTPRC, RBL1, SOCS3, STAT1, STAT4, TAP1, TLR4, TNFRSF1B                                                                                                                                                                                                                                                                                                                                                                            | 41 |
| Organismal Survival       | survival                          | survival of mice                       | 2,55E-12 | BCL2A1, CCL2, CCL21, CCND2, CCR2, CCR5, CD2, CDC7, CHEK2, CTLA4, CXCL9, CYBB, FAS, FLI1, GNA13, HGF, HLA-DRA, IDO1, IFI16, IGHM, IKZF1, IL7R, ITGAL, ITGAM, ITK, LY96, NLRP3, PRF1, PRKCB, PTGER4, PTGES, PTPRC, RBL1, SOCS3, STAT1, STAT4, TAP1, TLR4, TNFRSF1B                                                                                                                                                                                                                                                                                                                                                                                         | 39 |
| Organismal Survival       | death                             | death of mice                          | 3,52E-07 | AHR, APAF1, BCL2A1, C3AR1, CASP1, CBL, CCND2, CCR2, CCR5, CD28, CD3E, CD8A, CDC7, CTLA4, CX3CR1, CXCL9, CXCR4, CYBB, ETS1, FAS, FCER1G, FLI1, GNA13, GZMA, GZMB, HGF, HIF1A, ICOS, IGHG1, IL12RB1, IL2RB, IRF8, ITGAM, LCP2, LY96, LYN, LYZ, MAP3K1, PRF1, PTGES, PTPRC, RBL1, RUNX2, SOCS3, ST8SIA4, STAT1, STAT4, TBX21, TLR4, TNFRSF1B, TNFSF13B, VAV1                                                                                                                                                                                                                                                                                                | 52 |
| Infectious Disease        | infectious disorder               | infectious disorder of mammalia        | 1,18E-13 | AHR, BIRC3, C1QA, CASP1, CCL2, CCR2, CCR5, CD1D, CX3CR1, CYBB, FAS, HCK, HLA-DQB1, ICOS, IGHM, IRF8, ITGB2, ITK, LUM, PRF1, STAT1, STAT4, TBX21, TLR4, TLR7, VAV1                                                                                                                                                                                                                                                                                                                                                                                                                                                                                        | 26 |
| Infectious Disease        | infectious disorder               | infectious disorder of mice            | 1,91E-13 | AHR, BIRC3, C1QA, CASP1, CCL2, CCR2, CCR5, CD1D, CX3CR1, CYBB, FAS, HCK, HLA-DQB1, IGHM, IRF8, ITGB2, ITK, LUM, PRF1, STAT1, STAT4, TBX21, TLR4, TLR7, VAV1                                                                                                                                                                                                                                                                                                                                                                                                                                                                                              | 25 |
| Infectious Disease        | infectious disorder               | infectious disorder                    | 2,51E-13 | AHR, APOBEC3G, APOL1, ARL4C, BIRC3, C1QA, C3AR1, CASP1, CCL2, CCL4, CCL5, CCR2, CCR5, CCR6, CD28, CD47, CD69, CD86, CD163, CD247, CD1B, CD1D, CD3E, CELF2, CSF2RB, CTLA4, CTSS, CX3CR1, CXCL9, CXCR4, CYBB, DOCK10, FAM49B, FAS, FCER1A, FCER1G, FCGR2A, GABBR1, GABRP, HCK, HGF, HLA-DOA, HLA-DQB1, ICOS, IGHM, IGK@, IGL@, IL10RA, IL10RB, IL12RB1, IL2RB, IL2RG, IL7R, IRF1, IRF8, ITGAL, ITGAM, ITGB2, ITK, KLRC2, KLRD1, LAPTM5, LCK, LCP2, LEF1, LTF, LUM, LY86, LY96, LYN, LYZ, MNDA, MS4A4A, MYO1F, PRF1, PTPRC, SAMD9, SELPLG, SLC2A3, SLC4A7, STAT1, STAT4, TBX21, TLR4, TLR7, TLR8 (includes EG:51311), TNFRSF17, TNFRSF1B, UBE2Z, VAV1, XCL1 | 91 |
| Infectious Disease        | leprosy                           | leprosy                                | 1,80E-10 | CCL4, CCR6, CD28, CD47, CD1B, FCER1A, FCER1G, FCGR2A, IGHM, IGK@, IGL@, IL12RB1, IL2RB, IL2RG, LY86, TNFRSF17                                                                                                                                                                                                                                                                                                                                                                                                                                                                                                                                            | 16 |
| Infectious Disease        | lepromatous leprosy               | lepromatous leprosy                    | 1,35E-08 | CCL4, CD47, FCER1G, FCGR2A, IGHM, IGK@, IGL@, IL2RB, IL2RG, LY86, TNFRSF17                                                                                                                                                                                                                                                                                                                                                                                                                                                                                                                                                                               | 11 |
| Infectious Disease        | severe acute respiratory syndrome | severe acute respiratory syndrome      | 2,48E-07 | ARL4C, C3AR1, CD247, CD3E, CSF2RB, IL10RA, IRF8, ITGAM, ITK, LCK, LEF1, LTF, MNDA, SLC2A3, STAT4                                                                                                                                                                                                                                                                                                                                                                                                                                                                                                                                                         | 15 |
| Infectious Disease        | infection                         | infection of mammalia                  | 4,46E-07 | CASP1, CCR2, CCR5, CD1D, CX3CR1, ICOS, IGHM, ITGB2, ITK, PRF1, STAT1, TBX21, TLR4, TLR7                                                                                                                                                                                                                                                                                                                                                                                                                                                                                                                                                                  | 14 |
| Infectious Disease        | infection                         | infection of mice                      | 1,12E-06 | CASP1, CCR2, CCR5, CD1D, CX3CR1, IGHM, ITGB2, ITK, PRF1, STAT1, TBX21, TLR4, TLR7                                                                                                                                                                                                                                                                                                                                                                                                                                                                                                                                                                        | 13 |
| Hypersensitivity Response | degranulation                     | degranulation of mast cells            | 4,03E-13 | BTK, C3AR1, CD300A, CTLA4, FCER1A, FCER1G, HCK, ITK, LAT2, LAX1, LCP2, LYN, PIK3CD, PLD1, RAC2, VAV1                                                                                                                                                                                                                                                                                                                                                                                                                                                                                                                                                     | 16 |
| Hypersensitivity Response | activation                        | activation of mast cells               | 1,71E-08 | CCL5, CCR2, CD48, CD300A, FCER1G, FCGR2A, FYB, ITGAM, LCP2, TLR7, TLR8 (includes EG:51311)                                                                                                                                                                                                                                                                                                                                                                                                                                                                                                                                                               | 11 |
| Hypersensitivity Response | cell movement                     | cell movement of eosinophils           | 1,67E-07 | CCL2, CCL5, CCL21, CD2, CD47, CD48, CXCL9, IL2RB, ITGAL, ITGAM, ITGB2, ITK, RUNX3                                                                                                                                                                                                                                                                                                                                                                                                                                                                                                                                                                        | 13 |
| Antigen Presentation      | activation                        | activation of antigen presenting cells | 1,93E-12 | CCL2, CCL4, CCL5, CD86, CD1D, CSF1R, FAS, FCER1G, FCGR1A, FCGR2A, HCK, HLA-DMB, HLA-DOA, HLA-DQA1, HLA-DQB1, IGHM, ITGB6, LTF, PSMB9, PTGES, STAT1, STAT4, TLR4, TLR7, TNFRSF1B                                                                                                                                                                                                                                                                                                                                                                                                                                                                          | 25 |
| Antigen Presentation      | activation                        | activation of B lymphocytes            | 7,97E-11 | BTK, C1QA, CD86, CD8A, FAS, IGHG1, IGHM, LAT2, LAX1, LYN, PIK3CD, POU2AF1, PTPRC, TLR4, TNFRSF17, TNFSF13B, VAV1                                                                                                                                                                                                                                                                                                                                                                                                                                                                                                                                         | 17 |
| Antigen Presentation      | quantity                          | quantity of dendritic cells            | 5,54E-10 | CCL19, CCL21, CCR2, CCR6, CD47, CTLA4, IKZF1, IRF1, IRF4, IRF8, ITGB2, TLR4, TYROBP                                                                                                                                                                                                                                                                                                                                                                                                                                                                                                                                                                      | 13 |
| Antigen Presentation      | quantity                          | quantity of macrophages                | 1,07E-06 | CCL2, CCR2, CCR6, CSF1R, CTSS, CXCR6 (includes EG:10663), FAS, IL12RB1, ITGB6, PTGES, SELPLG, SOCS3, STAT4, TLR4                                                                                                                                                                                                                                                                                                                                                                                                                                                                                                                                         | 14 |



|                      |                 |                                             |          |                                                                                                                                                                                                                                                                                                                                                                                                                                                                                                                                                                                                                                                                                                                                                                                                                                                                                                                                                                                                                                                                                                                        |     |
|----------------------|-----------------|---------------------------------------------|----------|------------------------------------------------------------------------------------------------------------------------------------------------------------------------------------------------------------------------------------------------------------------------------------------------------------------------------------------------------------------------------------------------------------------------------------------------------------------------------------------------------------------------------------------------------------------------------------------------------------------------------------------------------------------------------------------------------------------------------------------------------------------------------------------------------------------------------------------------------------------------------------------------------------------------------------------------------------------------------------------------------------------------------------------------------------------------------------------------------------------------|-----|
| Antigen Presentation | phagocytosis    | phagocytosis of neutrophils                 | 4,30E-09 | CD47, CORO1A, CSF2RB, FCGR2A, FCGR3B, ITGAM, ITGB2, SELPLG, TLR4                                                                                                                                                                                                                                                                                                                                                                                                                                                                                                                                                                                                                                                                                                                                                                                                                                                                                                                                                                                                                                                       | 9   |
| Antigen Presentation | phagocytosis    | phagocytosis of phagocytes                  | 6,53E-07 | CD47, CORO1A, CSF2RB, FAS, FCGR2A, FCGR3B, ITGAM, ITGB2, SELPLG, TLR4                                                                                                                                                                                                                                                                                                                                                                                                                                                                                                                                                                                                                                                                                                                                                                                                                                                                                                                                                                                                                                                  | 10  |
| Antigen Presentation | recruitment     | recruitment of antigen presenting cells     | 1,07E-08 | C3AR1, CCL2, CCL4, CCL5, CCL19, CCR2, CCR5, CD8A, CX3CR1, ETS1, ITGB2, TLR4                                                                                                                                                                                                                                                                                                                                                                                                                                                                                                                                                                                                                                                                                                                                                                                                                                                                                                                                                                                                                                            | 12  |
| Antigen Presentation | recruitment     | recruitment of macrophages                  | 3,06E-07 | C3AR1, CCL2, CCL4, CCR2, CCR5, CD8A, CX3CR1, ETS1, ITGB2, TLR4                                                                                                                                                                                                                                                                                                                                                                                                                                                                                                                                                                                                                                                                                                                                                                                                                                                                                                                                                                                                                                                         | 10  |
| Antigen Presentation | chemotaxis      | chemotaxis of phagocytes                    | 2,48E-08 | CCL2, CCL4, CCL5, CD28, CORO1A, CX3CR1, CXCL6, CXCL9, FCER1G, FCGR2A, HCK, IL12RB1, ITGAM, ITGB2, PIK3CD, RAC2, XCL1                                                                                                                                                                                                                                                                                                                                                                                                                                                                                                                                                                                                                                                                                                                                                                                                                                                                                                                                                                                                   | 17  |
| Antigen Presentation | chemotaxis      | chemotaxis of neutrophils                   | 1,41E-06 | CCL2, CCL4, CCL5, CD28, CORO1A, CXCL6, FCER1G, FCGR2A, HCK, ITGAM, ITGB2, RAC2, XCL1                                                                                                                                                                                                                                                                                                                                                                                                                                                                                                                                                                                                                                                                                                                                                                                                                                                                                                                                                                                                                                   | 13  |
| Antigen Presentation | chemotaxis      | chemotaxis of B lymphocytes                 | 1,68E-06 | CCL19, CCL21, CCR2, CXCL9, RAC2, RGS1, TLR4                                                                                                                                                                                                                                                                                                                                                                                                                                                                                                                                                                                                                                                                                                                                                                                                                                                                                                                                                                                                                                                                            | 7   |
| Antigen Presentation | cell movement   | cell movement of macrophages                | 6,26E-08 | CCL2, CCL4, CCL5, CCR2, CCR5, CCR6, CSF1R, CX3CR1, CXCL9, HGF, HIF1A, IL12RB1, ITGB2, PIK3CD, PTGES, RAC2                                                                                                                                                                                                                                                                                                                                                                                                                                                                                                                                                                                                                                                                                                                                                                                                                                                                                                                                                                                                              | 16  |
| Antigen Presentation | migration       | migration of dendritic cells                | 1,26E-07 | CCL4, CCL5, CCL19, CCL21, CCR2, CCR5, CD86, CXCL9, CXCR4, IL10RA, PTGDR, RAC2, RUNX3                                                                                                                                                                                                                                                                                                                                                                                                                                                                                                                                                                                                                                                                                                                                                                                                                                                                                                                                                                                                                                   | 13  |
| Antigen Presentation | chemoattraction | chemoattraction of antigen presenting cells | 1,29E-07 | CCL2, CCL4, CCL5, CCL19, CXCL9, IL12RB1, TLR4                                                                                                                                                                                                                                                                                                                                                                                                                                                                                                                                                                                                                                                                                                                                                                                                                                                                                                                                                                                                                                                                          | 7   |
| Antigen Presentation | chemoattraction | chemoattraction of macrophages              | 1,02E-06 | CCL2, CCL4, CCL5, CXCL9, IL12RB1                                                                                                                                                                                                                                                                                                                                                                                                                                                                                                                                                                                                                                                                                                                                                                                                                                                                                                                                                                                                                                                                                       | 5   |
| Antigen Presentation | processing      | processing of antigen                       | 4,43E-07 | ERAP2, FCER1G, HLA-DMB, HLA-DOA, HLA-DQA1, HLA-DQB1, HLA-DRA                                                                                                                                                                                                                                                                                                                                                                                                                                                                                                                                                                                                                                                                                                                                                                                                                                                                                                                                                                                                                                                           | 7   |
| Antigen Presentation | accumulation    | accumulation of macrophages                 | 8,02E-07 | CCL2, CCL5, CCR2, CD28, CX3CR1, FAS, ITGAM, ITGAX, TLR4                                                                                                                                                                                                                                                                                                                                                                                                                                                                                                                                                                                                                                                                                                                                                                                                                                                                                                                                                                                                                                                                | 9   |
| Cancer               | cancer          | cancer                                      | 2,35E-12 | ACSL5, AHR, APAF1, ARL4C, BIRC3, CASP1, CBL, CCL2, CCL4, CCL5, CCL19, CCL21, CCND2, CCR2, CCR5, CD2, CD28, CD47, CD48, CD52, CD69, CD86, CD163, CD247, CD3D, CD3E, CD3G, CD8A, CDC7, CFH, CHEK2, CLEC10A, CLEC2D (includes EG:29121), CP, CSF1R, CSF2RB, CST7, CTLA4, CTSS, CXCL9, CXCR4, CXCR6 (includes EG:10663), CYTIP, DCK, DUSP5, ERAP2, ETS1, FAS, FCGR2A, FHL2, FLI1, GABBR1, GABRP, GBP2, GBP1 (includes EG:2633), GNA13, GPR65, GZMA, GZMB, GZMK, HCLS1, HDAC9 (includes EG:9734), HGF, HIF1A, HLA-DOA, HLA-DRA, HLA-E, ICOS, IDO1, IFI44, IFITM1, IGHM, IGJ, IGKC, IGL@, IKZF1, IL2RB, IL2RG, IL7R, IRF1, IRF4, ISG20, ITGB2, ITGB6, ITK, IVD, JAK3, KCNK6, KIAA1199, KLRK1, LCK, LEF1, LIMD2, LOC96610, LTF, LYN, LYZ, MALAT1, MAP3K1, MAP4K1, MIR155HG, MMP7, MYCL1, NLRP7, POLE4, PRDM1, PRF1, PRKCB, PSMB9, PTGER4, PTGES, PTPRA, PTPRC, PTPRE, PYHIN1 (includes EG:149628), RARRES1, RASSF5, RBL1, RGS1, RRM1 (includes EG:6240), RTN1, RUNX1, RUNX2, RUNX3, SECTM1, SERPINA3, SERPINB9, SLC2A3, SLC40A1, SOCS3, STAT1, STK4, TDO2, TLR4, TLR7, TNC, TNFRSF1B, TRA@, TRAT1, TYROBP, VCAN, XAF1, ZNF217 | 143 |
| Cancer               | tumorigenesis   | tumorigenesis                               | 6,54E-12 | ACSL5, AHR, APAF1, ARL4C, BIRC3, BTK, CASP1, CBL, CCL2, CCL4, CCL5, CCL19, CCL21, CCND2, CCR2, CCR5, CD2, CD28, CD47, CD48, CD52, CD69, CD86, CD163, CD247, CD1D, CD3D, CD3E, CD3G, CD8A, CD8B, CDC7, CFH, CHEK2, CLEC10A, CLEC2D (includes EG:29121), CP, CSF1R, CSF2RB, CST7, CTLA4, CTSS, CXCL9, CXCR4, CXCR6 (includes EG:10663), CYTIP, DCK, DUSP5, ERAP2, ETS1, FAS, FCER1A, FCGR2A, FHL2, FLI1, GABBR1, GABRP, GBP2, GBP1 (includes EG:2633), GNA13, GPR65, GZMA, GZMB, GZMK, HCLS1, HDAC9 (includes EG:9734), HGF, HIF1A, HLA-DOA, HLA-DRA, HLA-E, ICOS, IDO1, IFI44, IFITM1, IGHG1, IGHM, IGJ, IGKC, IGL@, IKZF1, IL2RB, IL2RG, IL7R, IRF1, IRF4, IRF8, ISG20, ITGB2, ITGB6, ITK, IVD, JAK3, KCNK6, KIAA1199, KLRK1, LCK, LEF1, LIMD2, LOC96610, LTF, LYN, LYZ, MALAT1, MAP3K1, MAP4K1, MIR155HG, MMP7, MYCL1, NLRP7, POLE4, PRDM1, PRF1, PRKCB, PSMB9, PTGER4, PTGES, PTPRA, PTPRC, PTPRE, PYHIN1 (includes EG:149628), RARRES1, RASSF5, RBL1, RGS1, RRM1 (includes EG:6240), RTN1, RUNX1, RUNX2,                                                                                                            | 151 |

|        |                            |                            |          |                                                                                                                                                                                                                                                                                                                                                                                                                                                                                                                                                                                                                                                                                                                                                                                                                                                                                              |     |
|--------|----------------------------|----------------------------|----------|----------------------------------------------------------------------------------------------------------------------------------------------------------------------------------------------------------------------------------------------------------------------------------------------------------------------------------------------------------------------------------------------------------------------------------------------------------------------------------------------------------------------------------------------------------------------------------------------------------------------------------------------------------------------------------------------------------------------------------------------------------------------------------------------------------------------------------------------------------------------------------------------|-----|
| Cancer | tumor                      | tumor                      | 7,39E-11 | RUNX3, SECTM1, SERPINA3, SERPINB9, SLC2A3, SLC40A1, SOCS3, STAT1, STK4, TDO2, TLR4, TLR7, TNC, TNFRSF1B, TNFSF13B, TRA@, TRAT1, TYROBP, VAV1, VCAN, XAF1, ZNF217                                                                                                                                                                                                                                                                                                                                                                                                                                                                                                                                                                                                                                                                                                                             | 111 |
| Cancer | malignant tumor            | malignant tumor            | 6,44E-10 | AHR, ARL4C, CASP1, CBL, CCL2, CCL4, CCL19, CCL21, CCND2, CCR2, CCR5, CD2, CD28, CD47, CD48, CD52, CD86, CD163, CD3D, CD8A, CD8B, CDC7, CFH, CHEK2, CLEC10A, CLEC2D (includes EG:29121), CP, CSF1R, CSF2RB, CST7, CTLA4, CTSS, CXCL9, CXCR4, CXCR6 (includes EG:10663), ETS1, FAS, FCGR2A, FHL2, FLI1, GABBR1, GABRP, GBP2, GBP1 (includes EG:2633), GNA13, GPR65, GZMB, GZMK, HDAC9 (includes EG:9734), HGF, HIF1A, HLA-DRA, HLA-E, ICOS, IDO1, IFI44, IFITM1, IGHG1, IKZF1, IL2RB, IL2RG, IRF1, IRF8, ITGB6, KCNK6, LCK, LEF1, LIMD2, LTF, LYN, LYZ, MALAT1, MAP4K1, MIR155HG, MMP7, MYCL1, NLRP7, POLE4, PRDM1, PRF1, PRKCB, PSMB9, PTGER4, PTGES, PTPRC, PTPRE, PYHIN1 (includes EG:149628), RARRES1, RASSF5, RBL1, RRM1 (includes EG:6240), RUNX1, RUNX2, RUNX3, SERPINB9, SLC40A1, SOCS3, STAT1, STK4, TDO2, TLR4, TLR7, TNC, TNFRSF1B, TNFSF13B, TRA@, TRAT1, TYROBP, VAV1, VCAN, XAF1 | 89  |
| Cancer | prostate cancer            | prostate cancer            | 2,77E-09 | AHR, ARL4C, CASP1, CCL2, CCL4, CCL19, CCR2, CCR5, CD2, CD48, CD52, CD163, CD3D, CD8A, CFH, CHEK2, CLEC10A, CP, CSF1R, CSF2RB, CST7, CTLA4, CTSS, CXCL9, CXCR4, ETS1, FAS, FCGR2A, FHL2, FLI1, GABBR1, GABRP, GBP2, GBP1 (includes EG:2633), GPR65, GZMB, GZMK, HDAC9 (includes EG:9734), HGF, HIF1A, HLA-DRA, HLA-E, ICOS, IDO1, IFI44, IFITM1, IKZF1, IL2RB, IL2RG, IRF1, KCNK6, LCK, LEF1, LIMD2, LTF, LYZ, MALAT1, MAP4K1, MIR155HG, MMP7, MYCL1, NLRP7, POLE4, PRDM1, PRF1, PRKCB, PTGER4, PTGES, PTPRC, PTPRE, PYHIN1 (includes EG:149628), RARRES1, RASSF5, RBL1, RRM1 (includes EG:6240), RUNX2, RUNX3, SERPINB9, SLC40A1, SOCS3, STAT1, STK4, TDO2, TLR7, TNC, TNFRSF1B, TRAT1, TYROBP, VCAN                                                                                                                                                                                         | 41  |
| Cancer | lymphocytic leukemia       | lymphocytic leukemia       | 1,10E-08 | CCL2, CCL5, CCR2, CD52, CFH, CHEK2, CSF1R, CSF2RB, CTLA4, CXCR4, CYTIP, FAS, FHL2, GBP2, GZMA, HDAC9 (includes EG:9734), IDO1, IGHM, IGL, IGKC, IGL@, IL7R, IRF1, ITK, LCK, LEF1, LOC96610, LTF, LYZ, MMP7, PRKCB, PTPRC, RARRES1, RBL1, RUNX1, RUNX2, RUNX3, SOCS3, STAT1, STK4, VCAN                                                                                                                                                                                                                                                                                                                                                                                                                                                                                                                                                                                                       | 21  |
| Cancer | hematologic cancer         | hematologic cancer         | 1,18E-08 | CCL4, CD52, CD86, CD247, CD3D, CD3E, CD3G, CSF2RB, CXCR4, DCK, FAS, IKZF1, IL2RB, IL2RG, IRF4, ITGB2, LCK, PRKCB, RRM1 (includes EG:6240), RUNX1, TLR7                                                                                                                                                                                                                                                                                                                                                                                                                                                                                                                                                                                                                                                                                                                                       | 31  |
| Cancer | leukemia                   | leukemia                   | 4,60E-08 | CBL, CCL4, CD2, CD52, CD86, CD247, CD3D, CD3E, CD3G, CSF1R, CSF2RB, CTLA4, CXCR4, DCK, FAS, HDAC9 (includes EG:9734), IKZF1, IL2RB, IL2RG, IRF4, ITGB2, JAK3, LCK, POLE4, PRKCB, RRM1 (includes EG:6240), RUNX1, TLR7                                                                                                                                                                                                                                                                                                                                                                                                                                                                                                                                                                                                                                                                        | 28  |
| Cancer | melanoma                   | melanoma                   | 6,18E-08 | CASP1, CCL4, CCL19, CD2, CD163, CD3D, CD8A, CSF1R, CSF2RB, CTLA4, CXCR4, GBP2, GBP1 (includes EG:2633), GZMB, GZMK, HDAC9 (includes EG:9734), HGF, HIF1A, HLA-E, IL2RB, IL2RG, IRF1, LCK, TRAT1                                                                                                                                                                                                                                                                                                                                                                                                                                                                                                                                                                                                                                                                                              | 24  |
| Cancer | pancreatic carcinoma       | pancreatic carcinoma       | 4,74E-07 | AHR, CSF1R, CTSS, GABRP, HIF1A, HLA-DRA, IFITM1, MIR155HG, MMP7, POLE4, PTGES, RRM1 (includes EG:6240)                                                                                                                                                                                                                                                                                                                                                                                                                                                                                                                                                                                                                                                                                                                                                                                       | 12  |
| Cancer | endocrine gland tumor      | endocrine gland tumor      | 5,55E-07 | AHR, CD48, CSF1R, CST7, CTSS, CXCR4, ETS1, GABRP, HIF1A, HLA-DRA, IFITM1, LIMD2, MIR155HG, MMP7, POLE4, PTGES, PTPRC, RRM1 (includes EG:6240), RUNX2                                                                                                                                                                                                                                                                                                                                                                                                                                                                                                                                                                                                                                                                                                                                         | 19  |
| Cancer | lymphomagenesis            | lymphomagenesis            | 7,17E-07 | CD52, CD163, CSF2RB, CTLA4, CXCL9, CXCR4, FAS, FCGR2A, HDAC9 (includes EG:9734), HGF, HIF1A, IKZF1, IL2RB, IL2RG, IRF1, LCK, MAP4K1, MYCL1, PRF1, PRKCB, PTPRC, RRM1 (includes EG:6240)                                                                                                                                                                                                                                                                                                                                                                                                                                                                                                                                                                                                                                                                                                      | 22  |
| Cancer | acute lymphocytic leukemia | acute lymphocytic leukemia | 8,90E-07 | CD52, CD86, CD247, CD3D, CD3E, CD3G, CSF2RB, CXCR4, FAS, IKZF1, LCK, RRM1 (includes EG:6240), RUNX1                                                                                                                                                                                                                                                                                                                                                                                                                                                                                                                                                                                                                                                                                                                                                                                          | 13  |
| Cancer | developmental              | developmental              | 1,12E-06 | AHR, CASP1, CCL2, CCL21, CCR2, CD86, CTLA4, CTSS, FAS, HGF, HIF1A,                                                                                                                                                                                                                                                                                                                                                                                                                                                                                                                                                                                                                                                                                                                                                                                                                           | 23  |

|                         |                                                                 |                                                                |          |                                                                                                                                                                                                                                   |    |
|-------------------------|-----------------------------------------------------------------|----------------------------------------------------------------|----------|-----------------------------------------------------------------------------------------------------------------------------------------------------------------------------------------------------------------------------------|----|
|                         | pment<br>l<br>process                                           | process of<br>tumor                                            |          | ICOS, IGHG1, IRF1, IRF8, ITGB6, LCK, PTGES, PTPRC, RBL1, RUNX1, RUNX2, TRA@                                                                                                                                                       |    |
| Cell<br>Morphology      | shape<br>change                                                 | shape change<br>of blood cells                                 | 2,46E-12 | CCL2, CCL5, CCR2, CD47, CD247, CD3E, CORO1A, DOCK2, FCGR2A, GNA13, GZMB, HCK, ICOS, ITGAL, ITGAM, ITGB2, LYN                                                                                                                      | 17 |
| Cell<br>Morphology      | shape<br>change                                                 | shape change<br>of leukocytes                                  | 2,30E-10 | CCL2, CCL5, CCR2, CD47, CD247, CD3E, CORO1A, DOCK2, HCK, ICOS, ITGAL, ITGAM, ITGB2, LYN                                                                                                                                           | 14 |
| Cell<br>Morphology      | shape<br>change                                                 | shape change<br>of eukaryotic<br>cells                         | 5,13E-09 | BASP1, CBL, CCL2, CCL5, CCR2, CD47, CD247, CD3E, CDC42SE2, CORO1A, CSF1R, DOCK2, FAS, FCGR2A, GNA13, GZMB, HCK, HGF, ICOS, ITGAL, ITGAM, ITGB2, KLRK1, LYN, PARVG, PLD1, RBL1, RUNX2, SERPINA3, TNC                               | 30 |
| Cell<br>Morphology      | shape<br>change                                                 | shape change<br>of normal cells                                | 9,09E-09 | BASP1, CCL2, CCL5, CCR2, CD47, CD247, CD3E, CORO1A, DOCK2, FCGR2A, GNA13, GZMB, HCK, HGF, ICOS, ITGAL, ITGAM, ITGB2, LYN, RUNX2, SERPINA3                                                                                         | 21 |
| Cell<br>Morphology      | shape<br>change                                                 | shape change<br>of<br>granulocytes                             | 9,29E-08 | CCL2, CCL5, CCR2, CORO1A, HCK, ITGAM, ITGB2, LYN                                                                                                                                                                                  | 8  |
| Cell<br>Morphology      | shape<br>change                                                 | shape change                                                   | 4,44E-07 | BASP1, CBL, CCL2, CCL4, CCL5, CCR2, CCR5, CD47, CD247, CD3E, CD3G, CDC42SE2, CORO1A, CSF1R, DOCK2, EMB, FAS, FCGR2A, GNA13, GZMB, HCK, HGF, ICOS, ITGAL, ITGAM, ITGB2, ITGB6, KLRK1, LYN, PARVG, PLD1, RBL1, RUNX2, SERPINA3, TNC | 35 |
| Cell<br>Morphology      | polariz<br>ation                                                | polarization of<br>cells                                       | 5,39E-12 | CCL2, CCL5, CCL19, CCL21, CCR5, CD28, CD47, CTLA4, CXCL9, GNA13, ICOS, IL12RB1, IRF4, ITGB2, LCK, RASSF5, STAT4, STK4, TBX21, VAV1                                                                                                | 20 |
| Cell<br>Morphology      | polariz<br>ation                                                | polarization of<br>eukaryotic<br>cells                         | 1,77E-11 | CCL5, CCL19, CCL21, CCR5, CD28, CD47, CTLA4, CXCL9, GNA13, ICOS, IL12RB1, IRF4, ITGB2, LCK, RASSF5, STAT4, STK4, TBX21, VAV1                                                                                                      | 19 |
| Cell<br>Morphology      | polariz<br>ation                                                | polarization of<br>blood cells                                 | 3,97E-10 | CCL5, CCL19, CCL21, CD28, CTLA4, CXCL9, ICOS, IL12RB1, IRF4, ITGB2, LCK, RASSF5, STAT4, TBX21, VAV1                                                                                                                               | 15 |
| Cell<br>Morphology      | polariz<br>ation                                                | polarization of<br>lymphocytes                                 | 8,95E-10 | CCL19, CCL21, CD28, CTLA4, ICOS, IL12RB1, IRF4, ITGB2, LCK, RASSF5, STAT4, TBX21, VAV1                                                                                                                                            | 13 |
| Cell<br>Morphology      | polariz<br>ation                                                | polarization of<br>leukocytes                                  | 2,76E-09 | CCL5, CCL19, CCL21, CD28, CTLA4, ICOS, IL12RB1, IRF4, ITGB2, LCK, RASSF5, STAT4, TBX21, VAV1                                                                                                                                      | 14 |
| Cell<br>Morphology      | polariz<br>ation                                                | polarization of<br>T lymphocytes                               | 1,71E-08 | CCL19, CD28, CTLA4, ICOS, IL12RB1, IRF4, LCK, RASSF5, STAT4, TBX21, VAV1                                                                                                                                                          | 11 |
| Cell<br>Morphology      | polariz<br>ation                                                | polarization of<br>membrane<br>rafts                           | 1,76E-07 | CD2, CD28, CD86, DOCK2, VAV1                                                                                                                                                                                                      | 5  |
| Cell<br>Morphology      | cell<br>spreadi<br>ng                                           | cell spreading<br>of blood cells                               | 7,48E-10 | CD47, CD247, CD3E, CORO1A, FCGR2A, GZMB, HCK, ICOS, ITGAL, ITGAM, ITGB2, LYN                                                                                                                                                      | 12 |
| Cell<br>Morphology      | cell<br>spreadi<br>ng                                           | cell spreading<br>of leukocytes                                | 2,41E-08 | CD47, CD247, CD3E, CORO1A, HCK, ICOS, ITGAL, ITGAM, ITGB2, LYN                                                                                                                                                                    | 10 |
| Cell<br>Morphology      | cell<br>spreadi<br>ng                                           | cell spreading<br>of normal cells                              | 3,31E-08 | CD47, CD247, CD3E, CORO1A, FCGR2A, GZMB, HCK, HGF, ICOS, ITGAL, ITGAM, ITGB2, LYN, SERPINA3                                                                                                                                       | 14 |
| Cell<br>Morphology      | cell<br>spreadi<br>ng                                           | cell spreading                                                 | 3,11E-07 | CBL, CCL5, CCR5, CD47, CD247, CD3E, CORO1A, FCGR2A, GZMB, HCK, HGF, ICOS, ITGAL, ITGAM, ITGB2, KLRK1, LYN, PARVG, SERPINA3, TNC                                                                                                   | 20 |
| Cell<br>Morphology      | cell<br>spreadi<br>ng                                           | cell spreading<br>of eukaryotic<br>cells                       | 6,16E-07 | CBL, CD47, CD247, CD3E, CORO1A, FCGR2A, GZMB, HCK, HGF, ICOS, ITGAL, ITGAM, ITGB2, KLRK1, LYN, PARVG, SERPINA3, TNC                                                                                                               | 18 |
| Cell<br>Morphology      | morph<br>ogenesi<br>s                                           | morphogenesi<br>s of cells                                     | 2,34E-08 | BASP1, CBL, CCL2, CCL4, CCL5, CCR2, CD47, CD247, CD3E, CD3G, CDC42SE2, CORO1A, CSF1R, DOCK2, FAS, FCGR2A, GNA13, GZMB, HCK, HGF, ICOS, IL7R, ITGAL, ITGAM, ITGB2, KLRK1, LYN, PARVG, PLD1, RAC2, RBL1, RUNX2, SERPINA3, STK4, TNC | 35 |
| Neurological<br>Disease | experi<br>mental<br>autoim<br>mune<br>enceph<br>alomye<br>litis | experimental<br>autoimmune<br>encephalomye<br>litis of rodents | 3,18E-12 | C3AR1, CASP1, CCR2, CCR6, CD28, CD86, CD1D, CTLA4, CX3CR1, FAS, HLA-DQA1, HLA-DQB1, ICOS, IDO1, IGHG1, IRF4, ITGAL, LYN, STAT1, STAT4, TBX21, TLR4, TYROBP                                                                        | 23 |
| Neurological<br>Disease | experi<br>mental<br>autoim                                      | experimental<br>autoimmune<br>encephalomye                     | 6,84E-12 | C3AR1, CASP1, CCR2, CCR6, CD28, CD86, CD1D, CTLA4, CX3CR1, FAS, HLA-DQA1, HLA-DQB1, ICOS, IDO1, IRF4, ITGAL, LYN, STAT1, STAT4, TBX21, TLR4, TYROBP                                                                               | 22 |

|                                                    |                                         |                                                  |          |                                                                                                                                                                                                                                    |    |  |
|----------------------------------------------------|-----------------------------------------|--------------------------------------------------|----------|------------------------------------------------------------------------------------------------------------------------------------------------------------------------------------------------------------------------------------|----|--|
|                                                    | mune<br>enceph<br>alomye<br>litis       | litis of mice                                    |          |                                                                                                                                                                                                                                    |    |  |
| Neurological<br>Disease                            | enceph<br>alitis                        | encephalitis                                     | 1,16E-11 | C3AR1, CASP1, CCR2, CCR6, CD28, CD86, CD1D, CTLA4, CX3CR1, FAS, HIF1A, HLA-DQA1, HLA-DQB1, ICOS, IDO1, IGHG1, IRF4, ITGAL, LYN, STAT1, STAT4, TBX21, TLR4, TYROBP                                                                  | 24 |  |
| Neurological<br>Disease                            | enceph<br>alopath<br>y                  | encephalopath<br>y of mice                       | 1,73E-10 | C3AR1, CASP1, CCR2, CCR6, CD28, CD86, CD1D, CTLA4, CX3CR1, CYBB, FAS, GABBR1, HLA-DQA1, HLA-DQB1, ICOS, IDO1, IRF4, ITGAL, LYN, STAT1, STAT4, TBX21, TLR4, TYROBP                                                                  | 24 |  |
| Neurological<br>Disease                            | neurolo<br>gical<br>disorde<br>r        | neurological<br>disorder of<br>mice              | 6,04E-07 | C1QA, C3AR1, CASP1, CCL21, CCR2, CCR6, CD28, CD86, CD1D, CTLA4, CTSS, CX3CR1, CYBB, FAS, GABBR1, HIF1A, HLA-DQA1, HLA-DQB1, ICOS, IDO1, IRF4, ITGAL, LYN, PTGES, ST8SIA4, STAT1, STAT4, TBX21, TLR4, TNFRSF1B, TRA@, TYROBP        | 32 |  |
| Neurological<br>Disease                            | neurolo<br>gical<br>disorde<br>r        | neurological<br>disorder of<br>rodents           | 8,55E-07 | C1QA, C3AR1, CASP1, CCL21, CCR2, CCR6, CD28, CD86, CD1D, CTLA4, CTSS, CX3CR1, CYBB, FAS, GABBR1, HIF1A, HLA-DQA1, HLA-DQB1, ICOS, IDO1, IGHG1, IRF4, ITGAL, LYN, PTGES, ST8SIA4, STAT1, STAT4, TBX21, TLR4, TNFRSF1B, TRA@, TYROBP | 33 |  |
| Lymphoid<br>Tissue<br>Structure and<br>Development | quantit<br>y                            | quantity of<br>granulocytes                      | 3,82E-12 | AHR, C1QA, CCR6, CD1D, CD8A, CFH, CSF2RB, FAS, FCER1A, FCGR1A, FLI1, IRF8, ITGB2, JAK3, LYN, PLSCR1, RAC2, SELPLG, SOCS3, STAT4, TLR4, TNFRSF1B                                                                                    | 22 |  |
| Lymphoid<br>Tissue<br>Structure and<br>Development | quantit<br>y                            | quantity of<br>myeloid cells                     | 7,21E-12 | AHR, C1QA, CCR6, CD1D, CD8A, CFH, CSF2RB, FAS, FCER1A, FCGR1A, FLI1, IKZF1, IRF8, ITGB2, JAK3, LYN, PLSCR1, RAC2, SELPLG, SOCS3, STAT4, TLR4, TNFRSF1B                                                                             | 23 |  |
| Lymphoid<br>Tissue<br>Structure and<br>Development | quantit<br>y                            | quantity of<br>lymphatic<br>system cells         | 1,67E-11 | AHR, C1QA, CCR6, CD1D, CD8A, CFH, CSF2RB, ETS1, FAS, FCER1A, FCGR1A, FLI1, IKZF1, IRF8, ITGB2, JAK3, LYN, PLSCR1, PSMB10, RAC2, SELPLG, SOCS3, STAT4, TLR4, TNFRSF1B                                                               | 25 |  |
| Lymphoid<br>Tissue<br>Structure and<br>Development | quantit<br>y                            | quantity of<br>neutrophils                       | 3,31E-08 | AHR, C1QA, CD1D, CFH, FAS, FCGR1A, ITGB2, JAK3, PLSCR1, RAC2, SELPLG, SOCS3, TLR4, TNFRSF1B                                                                                                                                        | 14 |  |
| Lymphoid<br>Tissue<br>Structure and<br>Development | formati<br>on                           | formation of<br>lymphatic<br>system<br>component | 3,36E-10 | CCL21, CD28, HGF, ICOS, KLHL6, LAX1, PIK3CD, POU2AF1, PRDM1, SH2D1A, TNFRSF1B, TNFSF13B, VAV1                                                                                                                                      | 13 |  |
| Lymphoid<br>Tissue<br>Structure and<br>Development | formati<br>on                           | formation of<br>germinal<br>center               | 2,41E-08 | CD28, ICOS, KLHL6, LAX1, PIK3CD, POU2AF1, PRDM1, SH2D1A, TNFSF13B, VAV1                                                                                                                                                            | 10 |  |
| Lymphoid<br>Tissue<br>Structure and<br>Development | chemot<br>axis                          | chemotaxis of<br>myeloid cells                   | 1,27E-06 | CCL2, CCL4, CCL5, CD28, CORO1A, CXCL6, CXCL9, FCER1G, FCGR2A, HCK, ITGAM, ITGB2, PTPRC, RAC2, XCL1                                                                                                                                 | 15 |  |
| Lymphoid<br>Tissue<br>Structure and<br>Development | chemot<br>axis                          | chemotaxis of<br>neutrophils                     | 1,41E-06 | CCL2, CCL4, CCL5, CD28, CORO1A, CXCL6, FCER1G, FCGR2A, HCK, ITGAM, ITGB2, RAC2, XCL1                                                                                                                                               | 13 |  |
| Gastrointesti<br>nal Disease                       | colitis                                 | colitis                                          | 5,53E-11 | CASP1, CCR2, CCR5, CD86, CD247, CD3D, CD3E, CD3G, CTLA4, FAS, FCER1A, IGHM, IL10RB, MMP7, PTGER4, RUNX3, SOCS3, STAT4, TLR4, TRA@                                                                                                  | 20 |  |
| Gastrointesti<br>nal Disease                       | inflam<br>matory<br>bowel<br>disease    | inflammatory<br>bowel disease<br>of mamma<br>lia | 8,05E-08 | CASP1, CCR2, CCR5, CTLA4, FAS, FCER1A, IGHM, MMP7, PIK3CD, PTGER4, STAT4, TLR4, TRA@                                                                                                                                               | 13 |  |
| Gastrointesti<br>nal Disease                       | digestiv<br>e<br>system<br>disorde<br>r | digestive<br>system<br>disorder of<br>mice       | 3,14E-07 | CASP1, CCR2, CCR5, CTLA4, FAS, FCER1A, IGHM, IL10RB, MMP7, PIK3CD, PTGER4, STAT4, TLR4, TRA@                                                                                                                                       | 14 |  |
| Gastrointesti<br>nal Disease                       | pancre<br>atic<br>carcino               | pancreatic<br>carcinoma                          | 4,74E-07 | AHR, CSF1R, CTSS, GABRP, HIF1A, HLA-DRA, IFITM1, MIR155HG, MMP7, POLE4, PTGES, RRM1 (includes EG:6240)                                                                                                                             | 12 |  |

|                              |                                  |                                        |          |                                                                                                                                                                                                                                                                                                         |    |  |
|------------------------------|----------------------------------|----------------------------------------|----------|---------------------------------------------------------------------------------------------------------------------------------------------------------------------------------------------------------------------------------------------------------------------------------------------------------|----|--|
|                              | ma                               |                                        |          |                                                                                                                                                                                                                                                                                                         |    |  |
| Gastrointestinal Disease     | ulcerative colitis               | ulcerative colitis                     | 7,80E-07 | CD86, CD247, CD3D, CD3E, CD3G, FAS, PTGER4, RUNX3, SOCS3, TLR4                                                                                                                                                                                                                                          | 10 |  |
| Genetic Disorder             | colitis                          | colitis                                | 5,53E-11 | CASP1, CCR2, CCR5, CD86, CD247, CD3D, CD3E, CD3G, CTLA4, FAS, FCER1A, IGHM, IL10RB, MMP7, PTGER4, RUNX3, SOCS3, STAT4, TLR4, TRA@                                                                                                                                                                       | 20 |  |
| Genetic Disorder             | leprosy                          | leprosy                                | 1,80E-10 | CCL4, CCR6, CD28, CD47, CD1B, FCER1A, FCER1G, FCGR2A, IGHM, IGK@, IGL@, IL12RB1, IL2RB, IL2RG, LY86, TNFRSF17                                                                                                                                                                                           | 16 |  |
| Genetic Disorder             | prostate cancer                  | prostate cancer                        | 2,77E-09 | CCL2, CCL5, CCR2, CD52, CFH, CHEK2, CSF1R, CSF2RB, CTLA4, CXCR4, CYTIP, FAS, FHL2, GBP2, GZMA, HDAC9 (includes EG:9734), IDO1, IGHM, IGJ, IGKC, IGL@, IL7R, IRF1, ITK, LCK, LEF1, LOC96610, LTF, LYZ, MMP7, PRKCB, PTPRC, RARRES1, RBL1, RUNX1, RUNX2, RUNX3, SOCS3, STAT1, STK4, VCAN                  | 41 |  |
| Genetic Disorder             | severe combined immunodeficiency | severe combined immunodeficiency       | 4,37E-09 | BTK, CD247, CD3D, CXCR4, IL2RG, IL7R, JAK3, PTPRC                                                                                                                                                                                                                                                       | 8  |  |
| Genetic Disorder             | lepromatous leprosy              | lepromatous leprosy                    | 1,35E-08 | CCL4, CD47, FCER1G, FCGR2A, IGHM, IGK@, IGL@, IL2RB, IL2RG, LY86, TNFRSF17                                                                                                                                                                                                                              | 11 |  |
| Genetic Disorder             | genetic disorder                 | genetic disorder of mice               | 7,40E-08 | AHR, CASP1, CBL, CCL5, CCR2, CCR5, CD86, CYBB, FAS, FCER1A, FCER1G, FCGR2A, FHL2, GZMB, HCK, ICOS, IGHG1, IGHM, ITGAM, ITGB2, JAK3, LCP2, LYN, MMP7, PIK3CD, PTGER4, RGS10, RUNX1, SOCS3, STAT4, TBX21, TLR4, TNFRSF1B, TRA@, TYROBP, VAV1                                                              | 36 |  |
| Genetic Disorder             | inflammatory bowel disease       | inflammatory bowel disease of mammalia | 8,05E-08 | CASP1, CCR2, CCR5, CTLA4, FAS, FCER1A, IGHM, MMP7, PIK3CD, PTGER4, STAT4, TLR4, TRA@                                                                                                                                                                                                                    | 13 |  |
| Genetic Disorder             | psoriatic arthritis              | psoriatic arthritis                    | 1,66E-07 | APAF1, CXCL9, HLA-E, IGHG1, IGHM, IGKC, ITGAL, LYN, MAP4K1, PRKCB, RUNX3, TNFRSF1B                                                                                                                                                                                                                      | 12 |  |
| Genetic Disorder             | pancreatic carcinoma             | pancreatic carcinoma                   | 4,74E-07 | AHR, CSF1R, CTSS, GABRP, HIF1A, HLA-DRA, IFITM1, MIR155HG, MMP7, POLE4, PTGES, RRM1 (includes EG:6240)                                                                                                                                                                                                  | 12 |  |
| Genetic Disorder             | ulcerative colitis               | ulcerative colitis                     | 7,80E-07 | CD86, CD247, CD3D, CD3E, CD3G, FAS, PTGER4, RUNX3, SOCS3, TLR4                                                                                                                                                                                                                                          | 10 |  |
| Reproductive System Disease  | endometriosis                    | endometriosis                          | 7,21E-11 | AHR, BMP8B, C10ORF10, CASP1, CCL2, CCL4, CCL19, CCL21, CD163, CSF1R, CXCL9, CXCR4, CXCR6 (includes EG:10663), GZMA, HGF, HIF1A, IGL@, IL2RB, IL2RG, ISG20, ITGAL, ITGAM, KIAA1199, LTF, MMP7, PIK3CD, PRKCB, PTPN22, RARRES1, RRM1 (includes EG:6240), SLC2A3, TNFRSF17, TNFRSF1B, TNFSF13B, XCL1, XCL2 | 36 |  |
| Reproductive System Disease  | prostate cancer                  | prostate cancer                        | 2,77E-09 | CCL2, CCL5, CCR2, CD52, CFH, CHEK2, CSF1R, CSF2RB, CTLA4, CXCR4, CYTIP, FAS, FHL2, GBP2, GZMA, HDAC9 (includes EG:9734), IDO1, IGHM, IGJ, IGKC, IGL@, IL7R, IRF1, ITK, LCK, LEF1, LOC96610, LTF, LYZ, MMP7, PRKCB, PTPRC, RARRES1, RBL1, RUNX1, RUNX2, RUNX3, SOCS3, STAT1, STK4, VCAN                  | 41 |  |
| Renal and Urological Disease | renal and urological disorder    | renal and urological disorder of mice  | 1,20E-10 | AHR, C1QA, CASP1, CCL5, CD2, CD28, CD1D, CFH, CTLA4, FAS, FCER1G, FLI1, HGF, HIF1A, ICOS, IGHG1, ITGAL, LYN, PTPRC, SH2D1A, SH2D2A, TLR4, TNFSF13B                                                                                                                                                      | 23 |  |
| Renal and Urological Disease | renal and urological disorder    | renal and urological disorder          | 2,54E-07 | AHR, C1QA, CASP1, CCL2, CCL4, CCL5, CCND2, CD2, CD28, CD52, CD1D, CD8A, CFH, CTLA4, CX3CR1, FAS, FCER1G, FLI1, HGF, HIF1A, HLA-DQB1, ICOS, IGHG1, ITGAL, LYN, NCF2, PRKCB, PTPRC, SERPINA3, SH2D1A, SH2D2A, TLR4, TNFRSF1B, TNFSF13B                                                                    | 34 |  |

|                                     |                       |                                       |          |                                                                                                                                                                                                                                                              |    |
|-------------------------------------|-----------------------|---------------------------------------|----------|--------------------------------------------------------------------------------------------------------------------------------------------------------------------------------------------------------------------------------------------------------------|----|
| Renal and Urological Disease        | glomerulonephritis    | glomerulonephritis of mice            | 1,66E-09 | C1QA, CD2, CD28, CD1D, CFH, CTLA4, FAS, ICOS, ITGAL, LYN, PTPRC, SH2D2A                                                                                                                                                                                      | 12 |
| Renal and Urological Disease        | glomerulonephritis    | glomerulonephritis                    | 1,11E-07 | C1QA, CCL4, CCL5, CD2, CD28, CD1D, CFH, CTLA4, FAS, ICOS, ITGAL, LYN, PTPRC, SH2D2A, TNFSF13B                                                                                                                                                                | 15 |
| Renal and Urological Disease        | nephritis             | nephritis of animal                   | 1,77E-09 | C1QA, CD2, CD28, CD1D, CFH, CTLA4, FAS, ICOS, ITGAL, LYN, PTPRC, SH2D2A, TLR4                                                                                                                                                                                | 13 |
| Renal and Urological Disease        | nephritis             | nephritis                             | 2,02E-09 | C1QA, CCL4, CCL5, CD2, CD28, CD1D, CD8A, CFH, CTLA4, FAS, HLA-DQB1, ICOS, ITGAL, LYN, PTPRC, SH2D2A, TLR4, TNFSF13B                                                                                                                                          | 18 |
| Renal and Urological Disease        | lupus nephritis       | lupus nephritis of mice               | 5,39E-07 | CD1D, CTLA4, FAS, ICOS, LYN, PTPRC                                                                                                                                                                                                                           | 6  |
| Antimicrobial Response              | antiviral response    | antiviral response                    | 6,41E-09 | APOBEC3G, CCL4, CCL5, CCL19, CXCR4, IFI44, IRF1, ISG20, MX2, SOCS3, STAT1, TLR7, TLR8 (includes EG:51311), TRIM22, VAV1                                                                                                                                      | 15 |
| Antimicrobial Response              | antiviral response    | antiviral response of organism        | 1,95E-07 | CCL4, CCL5, CCL19, CXCR4, IFI44, ISG20, MX2, STAT1, TLR7, TLR8 (includes EG:51311), TRIM22, VAV1                                                                                                                                                             | 12 |
| Organismal Injury and Abnormalities | damage                | damage of organ                       | 2,15E-08 | AHR, C1QA, CASP1, CCL2, CCR2, CCR5, CFH, CYBB, FAS, FCGR1A, FCGR2A, HCK, HIF1A, ITGAL, ITGB2, ITGB6, KLRD1, NLRP3, PRF1, STAT1, STAT4, TLR4, TNFRSF1B                                                                                                        | 23 |
| Organismal Injury and Abnormalities | injury                | injury of organ                       | 9,15E-08 | AHR, CASP1, CCL2, CFH, CYBB, FAS, FCGR1A, FCGR2A, ITGAL, ITGB2, ITGB6, KLRD1, NLRP3, STAT1, STAT4, TLR4, TNFRSF1B                                                                                                                                            | 17 |
| Organismal Injury and Abnormalities | fibrosis              | fibrosis                              | 1,64E-06 | AHR, CCL2, CCR2, CCR5, CCR6, CXCL6, CXCL9, CXCR4, ETS1, FAS, HCK, HGF, HIF1A, HLA-DRA, IFITM1, IGHG1, LCK, MMP7, PLSCR1, PRKCB, PSMB9, STAT1, STK4, TLR4, TNFRSF1B                                                                                           | 25 |
| Free Radical Scavenging             | production            | production of reactive oxygen species | 2,74E-08 | CCL5, CD28, CD47, CD52, CTLA4, CYBB, FAS, FCER1A, GZMA, GZMB, GZMK, LCP2, LYN, NCF2, NFE2L3, PRF1, PRKCB, RAC2, SELPLG, TLR4                                                                                                                                 | 20 |
| Free Radical Scavenging             | release               | release of superoxide                 | 1,00E-06 | CCL2, CYBB, FCER1G, FCGR2A, HCK, ITGB2, LYN, NCF2                                                                                                                                                                                                            | 8  |
| Infection Mechanism                 | infectivity           | infectivity of HIV-1                  | 4,40E-08 | APOBEC3G, CCL2, CCL4, CCL5, CCR5, CXCR4, HCK, IRF8                                                                                                                                                                                                           | 8  |
| Infection Mechanism                 | infectivity           | infectivity of virus                  | 1,21E-06 | APOBEC3G, CCL2, CCL4, CCL5, CCR5, CLEC10A, CXCR4, HCK, IRF8                                                                                                                                                                                                  | 9  |
| Infection Mechanism                 | replication           | replication of HIV                    | 1,92E-07 | APOBEC3G, CCL4, CCL5, CCR5, CD28, CIITA, CXCR4, HCK, IGKC, LCK, PLD1, PTPRC, TLR4                                                                                                                                                                            | 13 |
| Infection Mechanism                 | replication           | replication of HIV-1                  | 1,95E-07 | APOBEC3G, CCL4, CCL5, CCR5, CD28, CIITA, CXCR4, HCK, IGKC, LCK, PLD1, PTPRC                                                                                                                                                                                  | 12 |
| Infection Mechanism                 | replication           | replication of virus                  | 1,50E-06 | AHR, APOBEC3G, CCL2, CCL4, CCL5, CCR5, CD28, CD48, CIITA, CTSW, CXCR4, CXCR6 (includes EG:10663), FERMT3, HCK, IFITM1, IGKC, IL10RA, IL12RB1, ISG20, LCK, MX2, PLD1, PTPRC, RUNX1, SELPLG, SOCS3, STAT1, STAT4, TLR4, TRA@, VNN2                             | 31 |
| Cell Cycle                          | cell division process | cell division process of leukocytes   | 1,32E-07 | BTK, CD28, CD3E, CTLA4, HIF1A, IGHM, IL2RB, ITGAL, LEF1, RBL1, STAT1, STAT4, TNFSF13B, VAV1                                                                                                                                                                  | 14 |
| Cell Cycle                          | cell division process | cell division process of lymphocytes  | 1,92E-07 | BTK, CD28, CD3E, CTLA4, HIF1A, IGHM, IL2RB, ITGAL, LEF1, STAT1, STAT4, TNFSF13B, VAV1                                                                                                                                                                        | 13 |
| Gene Expression                     | activation            | activation of synthetic promoter      | 1,62E-07 | AHR, CBL, CD2, CD28, CSF2RB, CXCL6, CYTIP, ETS1, FAS, FCGR2A, FLI1, GNA13, GPR65, HGF, HIF1A, IRF1, IRF4, IRF8, LCK, LCP2, LEF1, LTF, NFKBIZ, NLRP3, POU2AF1, PTPN22, RBL1, RGS1, RUNX1, RUNX2, SH2D1A, SOCS3, SP100, SP140, STAT1, TLR4, TNFRSF1B, TNFSF13B | 38 |
| Gene Expression                     | activation            | activation of Nfat binding site       | 8,80E-07 | CBL, CD28, CD247, CD3E, LCK, VAV1                                                                                                                                                                                                                            | 6  |
| Gene Expression                     | binding               | binding of DNA                        | 1,14E-06 | AHR, BTK, CD28, CD3E, CTLA4, FAS, FYB, HGF, IFI16, IL2RB, JAK3, LCP2, MAP3K1, NFKBIZ, RUNX1, SOCS3, STAT1, STAT4, TNFRSF1B, TNFSF13B, VAV1                                                                                                                   | 21 |

|                                            |                 |                                |          |                                                                                                                           |    |
|--------------------------------------------|-----------------|--------------------------------|----------|---------------------------------------------------------------------------------------------------------------------------|----|
| Cellular Assembly and Organization         | polarization    | polarization of membrane rafts | 1,76E-07 | CD2, CD28, CD86, DOCK2, VAV1                                                                                              | 5  |
| Small Molecule Biochemistry                | secretion       | secretion of nitric oxide      | 3,15E-07 | CASP1, CD8A, PTPRC, SOCS3, STAT1, TLR4                                                                                    | 6  |
| Connective Tissue Development and Function | differentiation | differentiation of osteocytes  | 4,82E-07 | CCL2, CCL5, CD47, CD300LF, CSF1R, FAS, FCER1G, FHL2, IFI16, IGHG1, PTGER4, RBL1, RGS10, RUNX2, SOCS3, STAT1, TLR4, TYROBP | 18 |

**SUPPLEMENTAL TABLE 3**

© 2000-2010 Ingenuity Systems, Inc. All rights reserved.

**601 probeset list enrichment analysis (biological functions)**

| Category              | Function        | Function<br>Annotation               | p-value  | Molecules                                                                                                                                                                                                                                                                                                                                                                                                                                                                                                                                                                                                                                                                                                                                                                                                                                                                                                                                                                                                                                                                                       | # Molecules |
|-----------------------|-----------------|--------------------------------------|----------|-------------------------------------------------------------------------------------------------------------------------------------------------------------------------------------------------------------------------------------------------------------------------------------------------------------------------------------------------------------------------------------------------------------------------------------------------------------------------------------------------------------------------------------------------------------------------------------------------------------------------------------------------------------------------------------------------------------------------------------------------------------------------------------------------------------------------------------------------------------------------------------------------------------------------------------------------------------------------------------------------------------------------------------------------------------------------------------------------|-------------|
| Inflammatory Response | immune response | immune response                      | 1,35E-91 | ADA, AIM2, APOBEC3G, BTK, C3, C1QA, C1QB, C3AR1, CASP1, CCL2, CCL3, CCL4, CCL5, CCL11, CCL18, CCL19, CCL20, CCL21, CCR2, CCR5, CCR7, CD2, CD4, CD14, CD19, CD22, CD27, CD28, CD48, CD69, CD84, CD86, CD96, CD163, CD247, CD1C, CD1D, CD1E, CD300A, CD3E, CD79A, CD8A, CIITA, CLEC4C, CLEC5A, CLEC7A, CORO1A, CR2, CSF1R, CSF3R, CST7, CTSS, CTSW, CXCL1, CXCL6, CXCL9, CXCL10, CXCL11, CXCL13, CYBB, CYSLTR1, DEF6, DOCK2, ERAP2, FCER1G, FCGR3B, FGB, FPR1, FYB, GBP2, GNLY, GPR65, GPR183, GPSM3, GZMA, GZMB, GZMH, HCK, HCP5, HLA-DMB, HLA-DOA, HLA-DQA1, HLA-DQB1, HLA-DRB1, ICOS, IDO1, IGHG1, IGHM, IL16, IL10RA, IL12RB1, IL18RAP, IL1B, IL1RN, IL27RA, IL2RB, IL2RG, IL7R, IMPDH1, IRF7, ITGAL, ITGAX, ITGB2, ITK, JAK3, KLRK1, LAX1, LCK, LCN2, LCP2, LILRA1, LILRB1, LSP1, LTB, LTF, LY96, MMP7, MS4A1, NCF1, NCF4, NCF1C, NOD2, POU2AF1, PRF1, PSMB9, PTPRC, RGS1, RNASE6, SECTM1, SELL, SELPLG, SIRPG, SIT1, SLAMF1, SLAMF6, SLPI, SP140, STAT1, STAT4, TAC1, TAP1, TCL1A, TLR7, TLR8 (includes EG:51311), TNFRSF17, TNFRSF1B, TNFSF13B, TYROBP, UBASH3A, UNC93B1, VAV1, WAS, ZAP70 | 153         |
| Inflammatory Response | immune response | immune response of T lymphocytes     | 4,09E-10 | C3AR1, CASP1, CCL3, CD28, CD69, CD1D, CD8A, HLA-DQB1, ICOS, IL7R, ITK, PTPRC, TNFRSF1B                                                                                                                                                                                                                                                                                                                                                                                                                                                                                                                                                                                                                                                                                                                                                                                                                                                                                                                                                                                                          | 13          |
| Inflammatory Response | activation      | activation of leukocytes             | 7,25E-61 | ADA, BTK, C3, C1QA, C3AR1, CCL2, CCL3, CCL4, CCL5, CCL11, CCR2, CD2, CD4, CD14, CD19, CD22, CD27, CD28, CD48, CD86, CD163, CD247, CD1C, CD1D, CD1E, CD300A, CD3E, CD8A, CLEC4C, CLEC5A, CLEC7A, CORO1A, CR2, CSF1R, CXCL1, CXCL6, CXCL9, CXCL10, DEF6, DOCK2, FCER1G, FPR1, FYB, GNLY, GZMA, GZMB, HCK, HLA-DMB, HLA-DOA, HLA-DQA1, HLA-DQB1, HLA-DRB1, ICOS, IGHG1, IGHM, IL16, IL12RB1, IL18RAP, IL1B, IL1RN, IL27RA, IL2RB, IMPDH1, ITGAL, ITGB2, ITK, JAK3, KLRK1, LAX1, LCK, LCN2, LCP2, LILRB1, LTB, LTF, LY96, NCF1C, POU2AF1, PRF1, PSMB9, PTPRC, SELL, SIRPG, SIT1, SLAMF1, SLAMF6, SLPI, STAT1, STAT4, TAC1, TCL1A, TLR7, TLR8 (includes EG:51311), TNFRSF17, TNFRSF1B, TNFSF13B, TYROBP, VAV1, WAS                                                                                                                                                                                                                                                                                                                                                                                   | 99          |
| Inflammatory Response | activation      | activation of mononuclear leukocytes | 1,47E-49 | ADA, BTK, C3, C1QA, C3AR1, CCL2, CCL3, CCL4, CCL5, CCL11, CCR2, CD2, CD4, CD14, CD19, CD22, CD27, CD28, CD48, CD86, CD163, CD247, CD1C, CD1D, CD1E, CD3E, CD8A, CLEC4C, CLEC5A, CLEC7A, CORO1A, CR2, DEF6, DOCK2, FCER1G, GZMA, GZMB, HLA-DRB1, ICOS, IGHG1, IGHM, IL12RB1, IL1B, IL1RN, IL27RA, IL2RB, IMPDH1, ITGAL, ITGB2, ITK, JAK3, KLRK1, LAX1, LCK, LILRB1, LTF, LY96, NCF1C, POU2AF1, PRF1, PTPRC, SIRPG, SIT1, SLAMF1, SLAMF6, STAT1, STAT4, TAC1, TCL1A, TLR7, TLR8 (includes EG:51311), TNFRSF17, TNFRSF1B, TNFSF13B, TYROBP, VAV1, WAS                                                                                                                                                                                                                                                                                                                                                                                                                                                                                                                                              | 77          |
| Inflammatory Response | activation      | activation of lymphocytes            | 7,12E-47 | ADA, BTK, C3, C1QA, C3AR1, CCL2, CCL3, CCL4, CCL5, CCL11, CCR2, CD2, CD4, CD19, CD22, CD27, CD28, CD48, CD86, CD247, CD1C, CD1D, CD1E, CD3E, CD8A, CLEC4C, CLEC7A, CORO1A, CR2, DEF6, DOCK2, FCER1G, GZMA, GZMB, HLA-DRB1, ICOS, IGHG1, IGHM, IL12RB1, IL1B, IL1RN, IL27RA, IL2RB, IMPDH1, ITGAL, ITGB2, ITK, JAK3, KLRK1, LAX1, LCK, LILRB1, LTF, NCF1C, POU2AF1, PRF1, PTPRC, SIRPG, SIT1, SLAMF1, SLAMF6, STAT1, STAT4, TAC1, TCL1A, TLR7, TLR8 (includes EG:51311), TNFRSF17, TNFRSF1B, TNFSF13B, TYROBP, VAV1, WAS                                                                                                                                                                                                                                                                                                                                                                                                                                                                                                                                                                         | 73          |
| Inflammatory Response | activation      | activation of T lymphocytes          | 1,78E-36 | ADA, C3, C3AR1, CCL2, CCL3, CCL4, CCL5, CCL11, CCR2, CD2, CD4, CD28, CD48, CD86, CD247, CD1D, CD3E, CD8A, CLEC4C, CLEC7A, CORO1A, DEF6, DOCK2, FCER1G, GZMA, GZMB, HLA-DRB1, ICOS, IGHG1, IL1B, IL27RA, IL2RB, IMPDH1, ITGAL, ITGB2, ITK, JAK3, LAX1, LCK, LILRB1, NCF1C, PRF1, PTPRC, SIRPG, SIT1, SLAMF1, STAT1, STAT4, TAC1, TCL1A, TLR7, TLR8 (includes EG:51311), TNFRSF1B, TYROBP, VAV1, WAS                                                                                                                                                                                                                                                                                                                                                                                                                                                                                                                                                                                                                                                                                              | 56          |
| Inflammatory Response | activation      | activation of granulocytes           | 3,31E-17 | C3, CCL2, CCL3, CCL4, CCL5, CCL11, CD14, CXCL1, CXCL6, CXCL9, FPR1, IL16, IL18RAP, IL1B, IL1RN, ITGB2, LCN2, LTF, NCF1C, SELL, TAC1, VAV1                                                                                                                                                                                                                                                                                                                                                                                                                                                                                                                                                                                                                                                                                                                                                                                                                                                                                                                                                       | 22          |
| Inflammatory Response | activation      | activation of neutrophils            | 1,03E-14 | C3, CCL2, CCL3, CCL4, CCL5, CD14, CXCL1, CXCL6, FPR1, IL18RAP, IL1B, IL1RN, LCN2, LTF, NCF1C, SELL, TAC1, VAV1                                                                                                                                                                                                                                                                                                                                                                                                                                                                                                                                                                                                                                                                                                                                                                                                                                                                                                                                                                                  | 18          |
| Inflammatory Response | activation      | activation of                        | 9,47E-14 | CCL2, CCL3, CCL4, CCL5, CD4, CD86, CD1D, CSF1R, CXCL10, FCER1G, HCK,                                                                                                                                                                                                                                                                                                                                                                                                                                                                                                                                                                                                                                                                                                                                                                                                                                                                                                                                                                                                                            | 26          |



|                       |                       |                                        |          |                                                                                                                                                                                                                                                                                                                                                                                                                                                                                                                                                                      |    |
|-----------------------|-----------------------|----------------------------------------|----------|----------------------------------------------------------------------------------------------------------------------------------------------------------------------------------------------------------------------------------------------------------------------------------------------------------------------------------------------------------------------------------------------------------------------------------------------------------------------------------------------------------------------------------------------------------------------|----|
| ory Response          |                       | antigen presenting cells               |          | HLA-DMB, HLA-DOA, HLA-DQA1, HLA-DQB1, IGHM, IL1B, LTB, LTF, PSMB9, SLPI, STAT1, STAT4, TAC1, TLR7, TNFRSF1B                                                                                                                                                                                                                                                                                                                                                                                                                                                          |    |
| Inflammatory Response | activation            | activation of phagocytes               | 1,23E-13 | C3, CCL2, CCL3, CCL4, CCL5, CD4, CD14, CSF1R, CXCL1, CXCL6, CXCL10, FCER1G, FPR1, HCK, IL18RAP, IL1B, IL1RN, LCN2, LTF, NCF1C, SELL, STAT1, STAT4, TAC1, VAV1                                                                                                                                                                                                                                                                                                                                                                                                        | 25 |
| Inflammatory Response | activation            | activation of natural killer cells     | 1,63E-12 | CCL5, CD2, CD4, CD27, CD28, CD1D, IL12RB1, IL1B, IL1RN, IL2RB, ITGAL, ITGB2, KLRK1, LTF, PRF1, SLAMF6, STAT4, TAC1, TYROBP                                                                                                                                                                                                                                                                                                                                                                                                                                           | 19 |
| Inflammatory Response | activation            | activation of mast cells               | 4,94E-11 | C3, CCL3, CCL5, CCR2, CD48, CD300A, FCER1G, FYB, IL27RA, LCP2, TAC1, TLR7, TLR8 (includes EG:51311)                                                                                                                                                                                                                                                                                                                                                                                                                                                                  | 13 |
| Inflammatory Response | activation            | activation of B lymphocytes            | 3,87E-10 | ADA, BTK, C1QA, CD19, CD22, CD86, CD8A, CR2, IGHG1, IGHM, LAX1, POU2AF1, PTPRC, TNFRSF17, TNFSF13B, VAV1                                                                                                                                                                                                                                                                                                                                                                                                                                                             | 16 |
| Inflammatory Response | inflammatory response | inflammatory response                  | 2,85E-39 | ADA, AIF1, ALOX5, AOA, C3, C3AR1, CASP1, CCL2, CCL3, CCL4, CCL5, CCL11, CCL18, CCL19, CCL20, CCL21, CCR2, CCR5, CCR7, CD4, CD14, CD28, CLEC5A, CORO1A, CSF1R, CSF3R, CXCL1, CXCL2, CXCL6, CXCL9, CXCL10, CXCL11, CXCL13, CXCR3, CYBB, CYSLTR1, DARC, FCER1G, FGR, FPR1, GNLY, HCK, IGHG1, IL16, IL10RA, IL12RB1, IL18RAP, IL1B, IL1RN, ITGAL, ITGB2, LCN2, LSP1, LTF, LY96, LYZ, NCF1, NCF1C, NOD2, PLA2G7, PLA2G2D, PRKCB, PTPN6, PTPRC, RAC2, RGS1, S100A8, SAA1, SELL, SELPLG, SERPINA3, STAT1, STAT4, TAC1, TLR7, TLR8 (includes EG:51311), TNFRSF1B, VAV1, XCL1 | 79 |
| Inflammatory Response | chemotaxis            | chemotaxis of leukocytes               | 3,08E-27 | C3, CCL2, CCL3, CCL4, CCL5, CCL11, CCL18, CCL19, CCL20, CCL21, CCR2, CCR5, CCR7, CD4, CD28, CORO1A, CSF3R, CXCL1, CXCL2, CXCL6, CXCL9, CXCL10, CXCL11, CXCL13, CXCR3, CYSLTR1, FCER1G, FGR, FPR1, GNLY, HCK, IL16, IL12RB1, IL1B, ITGAL, ITGB2, LSP1, PRKCB, PTPN6, PTPRC, RAC2, RGS1, S100A8, SAA1, SERPINA3, TAC1, XCL1                                                                                                                                                                                                                                            | 47 |
| Inflammatory Response | chemotaxis            | chemotaxis of myeloid cells            | 7,75E-19 | C3, CCL2, CCL3, CCL4, CCL5, CCL11, CD28, CORO1A, CSF3R, CXCL1, CXCL2, CXCL6, CXCL9, CXCL10, CXCR3, FCER1G, FGR, FPR1, HCK, IL1B, ITGB2, LSP1, PTPN6, PTPRC, RAC2, S100A8, TAC1, XCL1                                                                                                                                                                                                                                                                                                                                                                                 | 28 |
| Inflammatory Response | chemotaxis            | chemotaxis of mononuclear leukocytes   | 8,38E-19 | CCL2, CCL3, CCL4, CCL5, CCL11, CCL18, CCL19, CCL20, CCL21, CCR2, CCR5, CCR7, CXCL9, CXCL10, CXCL11, CXCL13, CXCR3, CYSLTR1, FPR1, GNLY, IL16, IL1B, ITGAL, PRKCB, RAC2, RGS1, SAA1, SERPINA3, TAC1, XCL1                                                                                                                                                                                                                                                                                                                                                             | 30 |
| Inflammatory Response | chemotaxis            | chemotaxis of phagocytes               | 3,97E-18 | CCL2, CCL3, CCL4, CCL5, CD28, CORO1A, CSF3R, CXCL1, CXCL2, CXCL6, CXCL9, CXCL10, CXCR3, FCER1G, FGR, FPR1, HCK, IL12RB1, IL1B, ITGB2, LSP1, PTPN6, RAC2, S100A8, SAA1, TAC1, XCL1                                                                                                                                                                                                                                                                                                                                                                                    | 27 |
| Inflammatory Response | chemotaxis            | chemotaxis of granulocytes             | 7,31E-18 | C3, CCL2, CCL3, CCL4, CCL5, CCL11, CD28, CORO1A, CSF3R, CXCL1, CXCL2, CXCL6, CXCL9, CXCL10, CXCR3, FCER1G, FGR, FPR1, HCK, IL1B, ITGB2, LSP1, PTPN6, RAC2, S100A8, TAC1, XCL1                                                                                                                                                                                                                                                                                                                                                                                        | 27 |
| Inflammatory Response | chemotaxis            | chemotaxis of lymphocytes              | 9,70E-18 | CCL2, CCL3, CCL4, CCL5, CCL11, CCL18, CCL19, CCL20, CCL21, CCR2, CCR5, CCR7, CXCL9, CXCL10, CXCL11, CXCL13, CXCR3, CYSLTR1, GNLY, IL16, RAC2, RGS1, SAA1, TAC1, XCL1                                                                                                                                                                                                                                                                                                                                                                                                 | 25 |
| Inflammatory Response | chemotaxis            | chemotaxis of neutrophils              | 1,64E-16 | CCL2, CCL3, CCL4, CCL5, CD28, CORO1A, CSF3R, CXCL1, CXCL2, CXCL6, CXCL10, FCER1G, FGR, FPR1, HCK, IL1B, ITGB2, LSP1, PTPN6, RAC2, S100A8, TAC1, XCL1                                                                                                                                                                                                                                                                                                                                                                                                                 | 23 |
| Inflammatory Response | chemotaxis            | chemotaxis of antigen presenting cells | 2,54E-12 | CCL2, CCL3, CCL4, CCL5, CCL11, CCL19, CCL20, CCL21, CCR7, CXCL9, CXCR3, FPR1, GNLY, IL16, IL12RB1, IL1B, SAA1, TAC1                                                                                                                                                                                                                                                                                                                                                                                                                                                  | 18 |
| Inflammatory Response | chemotaxis            | chemotaxis of dendritic cells          | 2,22E-11 | CCL2, CCL3, CCL4, CCL5, CCL11, CCL19, CCL20, CCL21, CCR7, FPR1, GNLY, IL16, IL1B, TAC1                                                                                                                                                                                                                                                                                                                                                                                                                                                                               | 14 |
| Inflammatory Response | chemotaxis            | chemotaxis of T lymphocytes            | 2,84E-11 | CCL2, CCL3, CCL4, CCL5, CCL11, CCL18, CCL19, CCL20, CCL21, CCR5, CXCL9, CXCL10, CXCL11, CYSLTR1, GNLY, IL16                                                                                                                                                                                                                                                                                                                                                                                                                                                          | 16 |
| Inflammatory Response | chemotaxis            | chemotaxis of monocytes                | 2,68E-09 | CCL2, CCL3, CCL4, CCL5, CCL11, CCR2, CXCL9, CXCL10, FPR1, GNLY, IL1B, ITGAL, PRKCB, SERPINA3                                                                                                                                                                                                                                                                                                                                                                                                                                                                         | 14 |
| Inflammatory Response | chemotaxis            | chemotaxis of B lymphocytes            | 2,91E-09 | CCL18, CCL19, CCL20, CCL21, CCR2, CXCL9, CXCL13, RAC2, RGS1                                                                                                                                                                                                                                                                                                                                                                                                                                                                                                          | 9  |
| Inflammatory Response | chemotaxis            | chemotaxis                             | 3,45E-08 | C3, CCL2, CCL3, CCL5, CCL11, CXCL9, CXCL10, CXCR3, FPR1                                                                                                                                                                                                                                                                                                                                                                                                                                                                                                              | 9  |

|                                                 |                            |                                                           |          |                                                                                                                                                                                                                                                                                                      |    |
|-------------------------------------------------|----------------------------|-----------------------------------------------------------|----------|------------------------------------------------------------------------------------------------------------------------------------------------------------------------------------------------------------------------------------------------------------------------------------------------------|----|
| ory<br>Response<br>Inflammat<br>ory<br>Response | is<br>cell<br>movemen<br>t | of<br>eosinophils<br>cell<br>movement<br>of<br>phagocytes | 1,13E-24 | C2, C3, CASP1, CCL2, CCL3, CCL4, CCL5, CCL21, CCR2, CCR5, CD28, CORO1A, CSF1R, CSF3R, CXCL1, CXCL2, CXCL6, CXCL9, CXCL10, CXCR3, DARC, FCER1G, FGR, FPR1, HCK, IL16, IL12RB1, IL1B, IL1RN, ITGAL, ITGAX, ITGB2, LSP1, NCF1, PTPN6, RAC2, S100A8, SAA1, SELL, SELPLG, SLPI, TAC1, TNFRSF1B, WAS, XCL1 | 45 |
| Inflammat<br>ory<br>Response                    | cell<br>movemen<br>t       | cell<br>movement<br>of<br>neutrophils                     | 4,52E-22 | C2, C3, CASP1, CCL2, CCL3, CCL4, CCL5, CCL21, CCR2, CD28, CORO1A, CSF3R, CXCL1, CXCL2, CXCL6, CXCL10, FCER1G, FGR, FPR1, HCK, IL1B, IL1RN, ITGAL, ITGAX, ITGB2, LSP1, NCF1, PTPN6, RAC2, S100A8, SELL, SELPLG, SLPI, TAC1, TNFRSF1B, WAS, XCL1                                                       | 37 |
| Inflammat<br>ory<br>Response                    | cell<br>movemen<br>t       | cell<br>movement<br>of<br>macrophage<br>s                 | 1,01E-11 | C3, CCL2, CCL3, CCL4, CCL5, CCR2, CCR5, CSF1R, CXCL9, CXCL10, CXCR3, DARC, IL16, IL12RB1, IL1B, IL1RN, ITGB2, RAC2, SAA1, SELL                                                                                                                                                                       | 20 |
| Inflammat<br>ory<br>Response                    | cell<br>movemen<br>t       | cell<br>movement<br>of bone<br>marrow<br>cells            | 1,97E-11 | CCL2, CCL3, CCL4, CCL11, CXCL2, CXCL9, CXCL10, FPR1, ICAM2, IL1RN, ITGAL, ITGAX, ITGB2, LSP1, SLPI                                                                                                                                                                                                   | 15 |
| Inflammat<br>ory<br>Response                    | accumula<br>tion           | accumulatio<br>n of<br>leukocytes                         | 2,07E-22 | ALOX5, CCL2, CCL5, CCL11, CCL21, CCR2, CCR5, CCR7, CD28, CD86, CD1D, CXCL2, CXCL9, CXCL10, CXCR3, CYBB, DEF6, GRN, ICOS, IL10RA, IL1B, IL1RN, IL2RG, ITGAL, ITGAX, ITGB2, PTGDS, RUNX3, S100A8, SELL, SELPLG, SH2D2A, SLPI, TIMP1, TNFRSF25                                                          | 35 |
| Inflammat<br>ory<br>Response                    | accumula<br>tion           | accumulatio<br>n of<br>mononuclea<br>r leukocytes         | 1,31E-16 | CCL5, CCL21, CCR5, CCR7, CD28, CD86, CD1D, CXCL2, CXCL10, CXCR3, DEF6, ICOS, IL10RA, IL2RG, ITGAL, ITGB2, PTGDS, RUNX3, SELL, SH2D2A, TNFRSF25                                                                                                                                                       | 21 |
| Inflammat<br>ory<br>Response                    | accumula<br>tion           | accumulatio<br>n of<br>lymphocytes                        | 3,50E-15 | CCL5, CCL21, CCR5, CCR7, CD28, CD86, CD1D, CXCL10, CXCR3, DEF6, ICOS, IL10RA, IL2RG, ITGAL, ITGB2, RUNX3, SELL, SH2D2A, TNFRSF25                                                                                                                                                                     | 19 |
| Inflammat<br>ory<br>Response                    | accumula<br>tion           | accumulatio<br>n of T<br>lymphocytes                      | 5,82E-14 | CCL5, CCL21, CCR5, CCR7, CD28, CD86, CXCL10, CXCR3, DEF6, ICOS, IL10RA, IL2RG, ITGAL, RUNX3, SH2D2A, TNFRSF25                                                                                                                                                                                        | 16 |
| Inflammat<br>ory<br>Response                    | accumula<br>tion           | accumulatio<br>n of<br>phagocytes                         | 6,34E-11 | CCL2, CCL5, CCL11, CCR2, CD28, CXCL2, CXCL10, GRN, IL1B, IL1RN, ITGAX, ITGB2, S100A8, SELPLG, SLPI, TIMP1                                                                                                                                                                                            | 16 |
| Inflammat<br>ory<br>Response                    | accumula<br>tion           | accumulatio<br>n of<br>granulocyte<br>s                   | 2,59E-10 | ALOX5, CCL2, CCL5, CCL11, CXCL2, CXCL9, CXCL10, GRN, IL1B, IL1RN, ITGB2, PTGDS, S100A8, SELPLG, SLPI                                                                                                                                                                                                 | 15 |
| Inflammat<br>ory<br>Response                    | homing                     | homing of<br>phagocytes                                   | 4,11E-19 | CCL2, CCL3, CCL4, CCL5, CD28, CORO1A, CSF3R, CXCL1, CXCL2, CXCL6, CXCL9, CXCL10, CXCR3, FCER1G, FGR, FPR1, HCK, IL12RB1, IL1B, ITGB2, LSP1, PTPN6, RAC2, S100A8, SAA1, TAC1, WAS, XCL1                                                                                                               | 28 |
| Inflammat<br>ory<br>Response                    | homing                     | homing of<br>neutrophils                                  | 1,56E-17 | CCL2, CCL3, CCL4, CCL5, CD28, CORO1A, CSF3R, CXCL1, CXCL2, CXCL6, CXCL10, FCER1G, FGR, FPR1, HCK, IL1B, ITGB2, LSP1, PTPN6, RAC2, S100A8, TAC1, WAS, XCL1                                                                                                                                            | 24 |
| Inflammat<br>ory<br>Response                    | recruitme<br>nt            | recruitment<br>of<br>phagocytes                           | 7,71E-18 | C3AR1, CCL2, CCL3, CCL4, CCL5, CCL19, CCL20, CCR2, CCR5, CD14, CD19, CD28, CD8A, CR2, CXCL1, CXCL2, CXCL10, DARC, IL1B, IL1RN, ITGB2, LSP1, LYZ, SLPI, UCP2                                                                                                                                          | 25 |
| Inflammat<br>ory<br>Response                    | recruitme<br>nt            | recruitment<br>of<br>neutrophils                          | 4,34E-17 | C3AR1, CCL2, CCL3, CCL4, CCL5, CCL19, CCL20, CCR2, CD14, CD19, CD28, CD8A, CR2, CXCL1, CXCL2, CXCL10, DARC, IL1B, IL1RN, LSP1, LYZ, SLPI                                                                                                                                                             | 22 |
| Inflammat<br>ory<br>Response                    | recruitme<br>nt            | recruitment<br>of dendritic<br>cells                      | 4,81E-10 | CCL2, CCL3, CCL4, CCL5, CCL19, CCL20, CCR2, CXCL10                                                                                                                                                                                                                                                   | 8  |
| Inflammat<br>ory<br>Response                    | recruitme<br>nt            | recruitment<br>of<br>macrophage<br>s                      | 1,71E-08 | C3AR1, CCL2, CCL3, CCL4, CCR2, CCR5, CD8A, CXCL10, ITGB2, LSP1, UCP2                                                                                                                                                                                                                                 | 11 |
| Inflammat<br>ory<br>Response                    | inflamma<br>tion           | inflammatio<br>n                                          | 1,85E-17 | ADA, ALOX5, C3, C3AR1, CASP1, CCL2, CCL4, CCL5, CCL18, CCR2, CCR5, CD14, CD86, CTSS, CXCL2, CXCL10, DARC, FCER1G, ICOS, IGHG1, IL1B, IL1RN, IL27RA, IL2RG, IL7R, ITGB2, ITK, NCF1, PLA2G7, PRF1, PTPRC, PTTG1, S100A8, SELL, SLPI, STAT1, STAT4, TAC1, TLR8 (includes EG:51311),                     | 41 |

TNFRSF1B, TNFSF13B

|                       |                   |                                              |          |                                                                                                                                                                                                |    |
|-----------------------|-------------------|----------------------------------------------|----------|------------------------------------------------------------------------------------------------------------------------------------------------------------------------------------------------|----|
| Inflammatory Response | inflammation      | inflammation of organ                        | 1,05E-12 | ADA, CASP1, CCL4, CCL18, CCR2, CCR5, CD14, CTSS, CXCL2, DARC, ICOS, IGHG1, IL1B, IL1RN, IL27RA, ITGB2, ITK, NCF1, PRF1, SLPI, STAT1, STAT4, TAC1, TLR8 (includes EG:51311), TNFRSF1B, TNFSF13B | 26 |
| Inflammatory Response | inflammation      | inflammation of organism                     | 1,31E-09 | CASP1, CCL2, CCL5, CD14, CXCL10, FCER1G, IL1B, IL1RN, IL2RG, IL7R, ITGB2, PLA2G7, SELL, STAT1, STAT4, TAC1, TNFRSF1B                                                                           | 17 |
| Inflammatory Response | inflammation      | inflammation of respiratory system component | 3,35E-09 | ADA, C3, C3AR1, CASP1, CCL18, CCR2, CCR5, CD14, CD86, CTSS, DARC, ICOS, IL1B, ITK, NCF1, TAC1                                                                                                  | 16 |
| Inflammatory Response | inflammation      | inflammation of animal                       | 5,84E-08 | CASP1, CCL2, CCL5, CD14, CXCL10, FCER1G, IL1B, IL1RN, ITGB2, PLA2G7, SELL, STAT4, TAC1, TNFRSF1B                                                                                               | 14 |
| Inflammatory Response | chemoattraction   | chemoattraction of leukocytes                | 2,34E-16 | C3, CCL2, CCL3, CCL4, CCL5, CCL18, CCL19, CCL20, CXCL1, CXCL9, CXCL10, CXCL13, CXCR3, IL16, IL12RB1, XCL1                                                                                      | 16 |
| Inflammatory Response | chemoattraction   | chemoattraction of lymphocytes               | 3,48E-12 | CCL2, CCL3, CCL4, CCL5, CCL18, CXCL9, CXCL10, CXCL13, CXCR3, IL16                                                                                                                              | 10 |
| Inflammatory Response | chemoattraction   | chemoattraction of antigen presenting cells  | 8,00E-11 | CCL2, CCL3, CCL4, CCL5, CCL19, CCL20, CXCL9, CXCR3, IL12RB1                                                                                                                                    | 9  |
| Inflammatory Response | chemoattraction   | chemoattraction of macrophages               | 1,29E-10 | CCL2, CCL3, CCL4, CCL5, CXCL9, CXCR3, IL12RB1                                                                                                                                                  | 7  |
| Inflammatory Response | chemoattraction   | chemoattraction of phagocytes                | 4,55E-10 | CCL2, CCL3, CCL4, CCL5, CXCL1, CXCL9, CXCR3, IL12RB1, XCL1                                                                                                                                     | 9  |
| Inflammatory Response | migration         | migration of phagocytes                      | 3,90E-15 | CCL2, CCL3, CCL5, CSF1R, CXCL1, CXCL2, CXCL6, DARC, FGR, FPR1, HCK, IL1B, ITGAL, ITGAX, ITGB2, LSP1, MMP7, PIK3R5, RAC2, S100A8, SAA1, SELL, SLPI                                              | 23 |
| Inflammatory Response | migration         | migration of neutrophils                     | 1,41E-14 | CCL3, CCL5, CXCL1, CXCL2, CXCL6, DARC, FGR, FPR1, HCK, IL1B, ITGAL, ITGAX, ITGB2, LSP1, MMP7, PIK3R5, S100A8, SAA1, SELL, SLPI                                                                 | 20 |
| Inflammatory Response | antibody response | antibody response                            | 4,34E-15 | BTK, C3, CCL2, CCL5, CCR2, CD19, CD28, CR2, DARC, GPR183, ICOS, IGHG1, LCP2, LTF, LY86, POU2AF1, PSMB10, PTPRC, SH2D1A, TNFSF13B, VAV1                                                         | 21 |
| Inflammatory Response | antibody response | antibody response of animal                  | 2,10E-09 | BTK, C3, CD19, CD28, CR2, DARC, ICOS, IGHG1, PTPRC, SH2D1A, TNFSF13B, VAV1                                                                                                                     | 12 |
| Inflammatory Response | antibody response | antibody response of mice                    | 5,54E-08 | BTK, C3, CD19, CR2, DARC, ICOS, PTPRC, SH2D1A, TNFSF13B, VAV1                                                                                                                                  | 10 |
| Inflammatory Response | respiratory burst | respiratory burst                            | 1,81E-14 | C3, CCL2, CCL11, CD14, CXCL1, CYBB, FCER1G, FGR, FPR1, HCK, IGHA1, ITGAL, ITGAX, ITGB2, LTF, NCF1, PTPRC, TYROBP                                                                               | 18 |
| Inflammatory Response | respiratory burst | respiratory burst of cells                   | 5,61E-13 | C3, CCL2, CCL11, CD14, CXCL1, FCER1G, FGR, FPR1, HCK, IGHA1, ITGAL, ITGAX, ITGB2, PTPRC, TYROBP                                                                                                | 15 |
| Inflammatory Response | respiratory burst | respiratory burst of myeloid cells           | 3,65E-12 | C3, CCL11, CXCL1, FCER1G, FGR, FPR1, HCK, IGHA1, ITGAL, ITGAX, ITGB2, PTPRC, TYROBP                                                                                                            | 13 |
| Inflammatory Response | respiratory burst | respiratory burst of leukocytes              | 3,91E-12 | C3, CCL2, CCL11, CXCL1, FCER1G, FGR, FPR1, HCK, IGHA1, ITGAL, ITGAX, ITGB2, PTPRC, TYROBP                                                                                                      | 14 |
| Inflammatory Response | respiratory burst | respiratory burst of granulocytes            | 5,23E-11 | C3, CCL11, CXCL1, FCER1G, FGR, FPR1, HCK, IGHA1, ITGAL, ITGAX, ITGB2, TYROBP                                                                                                                   | 12 |

|                        |                     |                                   |          |                                                                                                                                                                                                              |    |
|------------------------|---------------------|-----------------------------------|----------|--------------------------------------------------------------------------------------------------------------------------------------------------------------------------------------------------------------|----|
| Inflammatory Response  | respiratory burst   | respiratory burst of neutrophils  | 2,62E-10 | C3, CXCL1, FCER1G, FGR, FPR1, HCK, IGHA1, ITGAL, ITGAX, ITGB2, TYROBP                                                                                                                                        | 11 |
| Inflammatory Response  | binding             | binding of phagocytes             | 6,86E-14 | C3, CD2, CD14, CD69, CLEC10A, CXCL2, CXCL10, FCGR3B, FGR, FPR1, HCK, ITGAL, ITGB2, LSP1, PTPN6, PTPRC, SELL, SELPLG                                                                                          | 18 |
| Inflammatory Response  | binding             | binding of neutrophils            | 7,08E-10 | C3, CXCL2, CXCL10, FCGR3B, FGR, HCK, ITGB2, LSP1, PTPN6, SELL, SELPLG                                                                                                                                        | 11 |
| Inflammatory Response  | phagocytosis        | phagocytosis                      | 1,79E-13 | C3, C1QA, CD4, CD14, CLEC7A, CORO1A, CSF2RB, CSF3R, CXCL10, DEF6, FCER1G, FCGR3B, FGR, HCK, ICOS, IGHG1, ITGAX, ITGB2, PRKCB, PTPN6, RAC2, SELPLG, VAV1, WAS                                                 | 24 |
| Inflammatory Response  | phagocytosis        | phagocytosis of cells             | 7,23E-12 | C3, C1QA, CD4, CD14, CORO1A, CSF2RB, CSF3R, CXCL10, DEF6, FCER1G, FCGR3B, FGR, HCK, ITGAX, ITGB2, PRKCB, PTPN6, RAC2, SELPLG, VAV1, WAS                                                                      | 21 |
| Inflammatory Response  | phagocytosis        | phagocytosis of eukaryotic cells  | 7,62E-09 | CD14, CORO1A, CSF2RB, CSF3R, CXCL10, DEF6, FCGR3B, FGR, HCK, ITGB2, PRKCB, PTPN6, RAC2, SELPLG, VAV1, WAS                                                                                                    | 16 |
| Inflammatory Response  | infiltration        | infiltration by neutrophils       | 8,14E-12 | C2, C3, CASP1, CCL3, CCL4, CCL21, CCR2, CXCL2, CXCL10, FCER1G, IL1B, IL1RN, ITGAL, ITGB2, NCF1, RAC2, SELL, TNFRSF1B, XCL1                                                                                   | 19 |
| Inflammatory Response  | antiviral response  | antiviral response                | 3,96E-11 | APOBEC3G, CCL4, CCL5, CCL11, CCL19, CCR7, FGR, IRF1, IRF7, ISG20, LCN2, LILRB1, RARRES3, STAT1, TLR7, TLR8 (includes EG:51311), VAV1                                                                         | 17 |
| Inflammatory Response  | antiviral response  | antiviral response of organism    | 1,29E-09 | CCL4, CCL5, CCL11, CCL19, FGR, IRF7, ISG20, LCN2, LILRB1, RARRES3, STAT1, TLR7, TLR8 (includes EG:51311), VAV1                                                                                               | 14 |
| Inflammatory Response  | degranulation       | degranulation of eukaryotic cells | 9,77E-11 | BTK, C3, C3AR1, CCL3, CCL4, CD300A, FCER1G, FCGR3B, FPR1, HCK, ITGB2, ITK, KLRK1, LAX1, LCP2, RAC2, SLA, TAC1, VAV1                                                                                          | 19 |
| Inflammatory Response  | degranulation       | degranulation of mast cells       | 8,80E-08 | BTK, C3, C3AR1, CD300A, FCER1G, HCK, ITK, LAX1, LCP2, RAC2, VAV1                                                                                                                                             | 11 |
| Inflammatory Response  | quantity            | quantity of phagocytes            | 2,02E-10 | ADA, C1QA, CCL2, CCL3, CCR2, CD1D, CSF1R, CSF3R, CTSS, CXCL10, CXCR6 (includes EG:10663), IL12RB1, IL1B, ITGB2, JAK3, LSP1, RAC2, S100A8, SELL, SELPLG, STAT4, TNFRSF1B                                      | 22 |
| Inflammatory Response  | adhesion            | adhesion of neutrophils           | 2,10E-09 | CORO1A, CSF3R, CXCL2, IL1B, ITGAL, ITGAX, ITGB2, LCP1, S100A8, SELL, SELPLG, VAV1                                                                                                                            | 12 |
| Inflammatory Response  | transmigration      | transmigration of granulocytes    | 2,32E-09 | CCL11, CXCL2, CXCL9, CXCL10, FPR1, ICAM2, ITGAL, ITGAX, ITGB2, LSP1, SLPI                                                                                                                                    | 11 |
| Inflammatory Response  | transmigration      | transmigration of dendritic cells | 1,11E-08 | CCL3, CCL4, CCL5, CCL19, CCR7, ICAM2, IL1B                                                                                                                                                                   | 7  |
| Inflammatory Response  | CD4 T-cell response | CD4 T-cell response               | 4,34E-09 | CASP1, CCR5, CD86, CLEC7A, CXCL10, CXCR3, ICOS, IL1B, IL27RA, IRF1, ITK, NCF1, STAT4                                                                                                                         | 13 |
| Inflammatory Response  | TH1 immune response | TH1 immune response of animal     | 6,40E-09 | CCR5, CLEC7A, CXCL10, CXCR3, IL1B, IL27RA, IRF1, ITK, STAT4                                                                                                                                                  | 9  |
| Inflammatory Response  | TH1 immune response | TH1 immune response               | 8,73E-08 | CCR5, CLEC7A, CXCL10, CXCR3, IL1B, IL27RA, IRF1, ITK, NCF1, STAT4                                                                                                                                            | 10 |
| Inflammatory Response  | processsing         | processing of antigen             | 1,34E-08 | ERAP2, FCER1G, HLA-DMB, HLA-DOA, HLA-DQA1, HLA-DQB1, HLA-DRB1, UNC93B1                                                                                                                                       | 8  |
| Cell-To-Cell Signaling | activation          | activation of leukocytes          | 7,25E-61 | ADA, BTK, C3, C1QA, C3AR1, CCL2, CCL3, CCL4, CCL5, CCL11, CCR2, CD2, CD4, CD14, CD19, CD22, CD27, CD28, CD48, CD86, CD163, CD247, CD1C, CD1D, CD1E, CD300A, CD3E, CD8A, CLEC4C, CLEC5A, CLEC7A, CORO1A, CR2, | 99 |

|                                        |            |                                      |          |                                                                                                                                                                                                                                                                                                                                                                                                                                                                                                                                                                                                                                                                                                                                                                                                       |     |
|----------------------------------------|------------|--------------------------------------|----------|-------------------------------------------------------------------------------------------------------------------------------------------------------------------------------------------------------------------------------------------------------------------------------------------------------------------------------------------------------------------------------------------------------------------------------------------------------------------------------------------------------------------------------------------------------------------------------------------------------------------------------------------------------------------------------------------------------------------------------------------------------------------------------------------------------|-----|
| and Interaction                        |            |                                      |          | CSF1R, CXCL1, CXCL6, CXCL9, CXCL10, DEF6, DOCK2, FCER1G, FPR1, FYB, GNLY, GZMA, GZMB, HCK, HLA-DMB, HLA-DOA, HLA-DQA1, HLA-DQB1, HLA-DRB1, ICOS, IGHG1, IGHM, IL16, IL12RB1, IL18RAP, IL1B, IL1RN, IL27RA, IL2RB, IMPDH1, ITGAL, ITGB2, ITK, JAK3, KLRK1, LAX1, LCK, LCN2, LCP2, LILRB1, LTB, LTF, LY96, NCF1C, POU2AF1, PRF1, PSMB9, PTPRC, SELL, SIRPG, SIT1, SLAMF1, SLAMF6, SLPI, STAT1, STAT4, TAC1, TCL1A, TLR7, TLR8 (includes EG:51311), TNFRSF17, TNFRSF1B, TNFSF13B, TYROBP, VAV1, WAS                                                                                                                                                                                                                                                                                                      |     |
| Cell-To-Cell Signaling and Interaction | activation | activation of cells                  | 4,03E-56 | ADA, BCL2A1, BTK, C3, C1QA, C3AR1, CASP1, CCL2, CCL3, CCL4, CCL5, CCL11, CCL21, CCR2, CD2, CD4, CD14, CD19, CD22, CD27, CD28, CD48, CD86, CD163, CD247, CD1C, CD1D, CD1E, CD300A, CD3E, CD8A, CLEC4C, CLEC5A, CLEC7A, CORO1A, CR2, CSF1R, CXCL1, CXCL2, CXCL6, CXCL9, CXCL10, CYBB, DEF6, DOCK2, FCER1G, FPR1, FYB, GNLY, GZMA, GZMB, HCK, HLA-DMB, HLA-DOA, HLA-DQA1, HLA-DQB1, HLA-DRB1, ICAM2, ICOS, IGHG1, IGHM, IGK@, IGL@, IL16, IL12RB1, IL18RAP, IL1B, IL1RN, IL27RA, IL2RB, IL2RG, IMPDH1, ITGAL, ITGAX, ITGB2, ITK, JAK3, KLRK1, LAX1, LCK, LCN2, LCP2, LILRB1, LTB, LTF, LY96, NCF1C, POU2AF1, PRF1, PSMB9, PTPRC, SAA1, SELL, SIRPG, SIT1, SLAMF1, SLAMF6, SLPI, STAT1, STAT4, TAC1, TCL1A, TIMP1, TLR7, TLR8 (includes EG:51311), TNFRSF17, TNFRSF1B, TNFSF13B, TYROBP, VAV1, WAS, ZAP70 | 112 |
| Cell-To-Cell Signaling and Interaction | activation | activation of normal cells           | 2,66E-54 | ADA, BCL2A1, BTK, C3, C1QA, C3AR1, CASP1, CCL2, CCL3, CCL4, CCL5, CCL11, CCL21, CCR2, CD2, CD4, CD14, CD19, CD22, CD27, CD28, CD48, CD86, CD163, CD247, CD1C, CD1D, CD1E, CD300A, CD3E, CD8A, CLEC4C, CLEC5A, CLEC7A, CORO1A, CR2, CSF1R, CXCL1, CXCL2, CXCL6, CXCL9, CXCL10, CYBB, DEF6, DOCK2, FCER1G, FPR1, FYB, GNLY, GZMA, GZMB, HCK, HLA-DMB, HLA-DOA, HLA-DQA1, HLA-DQB1, HLA-DRB1, ICOS, IGHG1, IGHM, IL16, IL12RB1, IL18RAP, IL1B, IL1RN, IL27RA, IL2RB, IMPDH1, ITGAL, ITGB2, ITK, JAK3, KLRK1, LAX1, LCK, LCN2, LCP2, LILRB1, LTB, LTF, LY96, NCF1C, POU2AF1, PRF1, PSMB9, PTPRC, SAA1, SELL, SIRPG, SIT1, SLAMF1, SLAMF6, SLPI, STAT1, STAT4, TAC1, TCL1A, TLR7, TLR8 (includes EG:51311), TNFRSF17, TNFRSF1B, TNFSF13B, TYROBP, VAV1, WAS                                                | 105 |
| Cell-To-Cell Signaling and Interaction | activation | activation of eukaryotic cells       | 3,60E-52 | ADA, BCL2A1, BTK, C3, C1QA, C3AR1, CASP1, CCL2, CCL3, CCL4, CCL5, CCL11, CCL21, CCR2, CD2, CD4, CD14, CD19, CD22, CD27, CD28, CD48, CD86, CD163, CD247, CD1C, CD1D, CD1E, CD300A, CD3E, CD8A, CLEC4C, CLEC5A, CLEC7A, CORO1A, CR2, CSF1R, CXCL1, CXCL2, CXCL6, CXCL9, CXCL10, CYBB, DEF6, DOCK2, FCER1G, FPR1, FYB, GNLY, GZMA, GZMB, HCK, HLA-DMB, HLA-DOA, HLA-DQA1, HLA-DQB1, HLA-DRB1, ICOS, IGHG1, IGHM, IL16, IL12RB1, IL18RAP, IL1B, IL1RN, IL27RA, IL2RB, IMPDH1, ITGAL, ITGB2, ITK, JAK3, KLRK1, LAX1, LCK, LCN2, LCP2, LILRB1, LTB, LTF, LY96, NCF1C, POU2AF1, PRF1, PSMB9, PTPRC, SAA1, SELL, SIRPG, SIT1, SLAMF1, SLAMF6, SLPI, STAT1, STAT4, TAC1, TCL1A, TLR7, TLR8 (includes EG:51311), TNFRSF17, TNFRSF1B, TNFSF13B, TYROBP, VAV1, WAS, ZAP70                                         | 106 |
| Cell-To-Cell Signaling and Interaction | activation | activation of mononuclear leukocytes | 1,47E-49 | ADA, BTK, C3, C1QA, C3AR1, CCL2, CCL3, CCL4, CCL5, CCL11, CCR2, CD2, CD4, CD14, CD19, CD22, CD27, CD28, CD48, CD86, CD163, CD247, CD1C, CD1D, CD1E, CD3E, CD8A, CLEC4C, CLEC5A, CLEC7A, CORO1A, CR2, DEF6, DOCK2, FCER1G, GZMA, GZMB, HLA-DRB1, ICOS, IGHG1, IGHM, IL12RB1, IL1B, IL1RN, IL27RA, IL2RB, IMPDH1, ITGAL, ITGB2, ITK, JAK3, KLRK1, LAX1, LCK, LILRB1, LTF, LY96, NCF1C, POU2AF1, PRF1, PTPRC, SIRPG, SIT1, SLAMF1, SLAMF6, STAT1, STAT4, TAC1, TCL1A, TLR7, TLR8 (includes EG:51311), TNFRSF17, TNFRSF1B, TNFSF13B, TYROBP, VAV1, WAS                                                                                                                                                                                                                                                    | 77  |
| Cell-To-Cell Signaling and Interaction | activation | activation of lymphocytes            | 7,12E-47 | ADA, BTK, C3, C1QA, C3AR1, CCL2, CCL3, CCL4, CCL5, CCL11, CCR2, CD2, CD4, CD19, CD22, CD27, CD28, CD48, CD86, CD247, CD1C, CD1D, CD1E, CD3E, CD8A, CLEC4C, CLEC7A, CORO1A, CR2, DEF6, DOCK2, FCER1G, GZMA, GZMB, HLA-DRB1, ICOS, IGHG1, IGHM, IL12RB1, IL1B, IL1RN, IL27RA, IL2RB, IMPDH1, ITGAL, ITGB2, ITK, JAK3, KLRK1, LAX1, LCK, LILRB1, LTF, NCF1C, POU2AF1, PRF1, PTPRC, SIRPG, SIT1, SLAMF1, SLAMF6, STAT1, STAT4, TAC1, TCL1A, TLR7, TLR8 (includes EG:51311), TNFRSF17, TNFRSF1B, TNFSF13B, TYROBP, VAV1, WAS                                                                                                                                                                                                                                                                               | 73  |
| Cell-To-Cell Signaling and Interaction | activation | activation of T lymphocytes          | 1,78E-36 | ADA, C3, C3AR1, CCL2, CCL3, CCL4, CCL5, CCL11, CCR2, CD2, CD4, CD28, CD48, CD86, CD247, CD1D, CD3E, CD8A, CLEC4C, CLEC7A, CORO1A, DEF6, DOCK2, FCER1G, GZMA, GZMB, HLA-DRB1, ICOS, IGHG1, IL1B, IL27RA, IL2RB, IMPDH1, ITGAL, ITGB2, ITK, JAK3, LAX1, LCK, LILRB1, NCF1C, PRF1, PTPRC, SIRPG, SIT1, SLAMF1, STAT1, STAT4, TAC1, TCL1A, TLR7, TLR8 (includes EG:51311), TNFRSF1B, TYROBP, VAV1, WAS                                                                                                                                                                                                                                                                                                                                                                                                    | 56  |
| Cell-To-Cell                           | activation | activation of lymphatic              | 3,05E-17 | C3, CCL2, CCL3, CCL4, CCL5, CCL11, CD14, CXCL1, CXCL6, CXCL9, FPR1, IL16, IL18RAP, IL1B, IL1RN, ITGB2, LCN2, LTF, NCF1C, PRF1, SELL, TAC1, VAV1                                                                                                                                                                                                                                                                                                                                                                                                                                                                                                                                                                                                                                                       | 23  |

|                                        |            |                                        |          |                                                                                                                                                                                                                                                                                                                                                                                                           |    |  |
|----------------------------------------|------------|----------------------------------------|----------|-----------------------------------------------------------------------------------------------------------------------------------------------------------------------------------------------------------------------------------------------------------------------------------------------------------------------------------------------------------------------------------------------------------|----|--|
| Signaling and Interaction              |            | system cells                           |          |                                                                                                                                                                                                                                                                                                                                                                                                           |    |  |
| Cell-To-Cell Signaling and Interaction | activation | activation of granulocytes             | 3,31E-17 | C3, CCL2, CCL3, CCL4, CCL5, CCL11, CD14, CXCL1, CXCL6, CXCL9, FPR1, IL16, IL18RAP, IL1B, IL1RN, ITGB2, LCN2, LTF, NCF1C, SELL, TAC1, VAV1                                                                                                                                                                                                                                                                 | 22 |  |
| Cell-To-Cell Signaling and Interaction | activation | activation of neutrophils              | 1,03E-14 | C3, CCL2, CCL3, CCL4, CCL5, CD14, CXCL1, CXCL6, FPR1, IL18RAP, IL1B, IL1RN, LCN2, LTF, NCF1C, SELL, TAC1, VAV1                                                                                                                                                                                                                                                                                            | 18 |  |
| Cell-To-Cell Signaling and Interaction | activation | activation of antigen presenting cells | 9,47E-14 | CCL2, CCL3, CCL4, CCL5, CD4, CD86, CD1D, CSF1R, CXCL10, FCER1G, HCK, HLA-DMB, HLA-DOA, HLA-DQA1, HLA-DQB1, IGHM, IL1B, LTB, LTF, PSMB9, SLPI, STAT1, STAT4, TAC1, TLR7, TNFRSF1B                                                                                                                                                                                                                          | 26 |  |
| Cell-To-Cell Signaling and Interaction | activation | activation of phagocytes               | 1,23E-13 | C3, CCL2, CCL3, CCL4, CCL5, CD4, CD14, CSF1R, CXCL1, CXCL6, CXCL10, FCER1G, FPR1, HCK, IL18RAP, IL1B, IL1RN, LCN2, LTF, NCF1C, SELL, STAT1, STAT4, TAC1, VAV1                                                                                                                                                                                                                                             | 25 |  |
| Cell-To-Cell Signaling and Interaction | activation | activation of natural killer cells     | 1,63E-12 | CCL5, CD2, CD4, CD27, CD28, CD1D, IL12RB1, IL1B, IL1RN, IL2RB, ITGAL, ITGB2, KLRK1, LTF, PRF1, SLAMF6, STAT4, TAC1, TYROBP                                                                                                                                                                                                                                                                                | 19 |  |
| Cell-To-Cell Signaling and Interaction | activation | activation of mast cells               | 4,94E-11 | C3, CCL3, CCL5, CCR2, CD48, CD300A, FCER1G, FYB, IL27RA, LCP2, TAC1, TLR7, TLR8 (includes EG:51311)                                                                                                                                                                                                                                                                                                       | 13 |  |
| Cell-To-Cell Signaling and Interaction | activation | activation of B lymphocytes            | 3,87E-10 | ADA, BTK, C1QA, CD19, CD22, CD86, CD8A, CR2, IGHG1, IGHM, LAX1, POU2AF1, PTPRC, TNFRSF17, TNFSF13B, VAV1                                                                                                                                                                                                                                                                                                  | 16 |  |
| Cell-To-Cell Signaling and Interaction | binding    | binding of leukocytes                  | 3,85E-34 | C3, CCL2, CCL3, CCL4, CCL5, CCL11, CCL19, CCL20, CCL21, CCR5, CD2, CD4, CD6, CD14, CD48, CD69, CD86, CD3E, CLEC10A, CXCL2, CXCL9, CXCL10, CXCL11, CXCL13, CXCR3, FCGR3B, FGR, FPR1, FYB, HCK, ICOS, ITGAL, ITGAX, ITGB2, ITK, KLRK1, LCK, LCP2, LSP1, LTF, PTPN6, PTPRC, SELL, SELPLG, TAC1                                                                                                               | 45 |  |
| Cell-To-Cell Signaling and Interaction | binding    | binding of blood cells                 | 6,86E-32 | C3, CCL2, CCL3, CCL4, CCL5, CCL11, CCL19, CCL20, CCL21, CCR5, CD2, CD4, CD6, CD14, CD48, CD69, CD84, CD86, CD3E, CLEC10A, CXCL2, CXCL9, CXCL10, CXCL11, CXCL13, CXCR3, DARC, FCGR3B, FGR, FPR1, FYB, HCK, ICOS, ITGAL, ITGAX, ITGB2, ITK, KLRK1, LCK, LCP2, LSP1, LTF, PTPN6, PTPRC, SELL, SELPLG, TAC1                                                                                                   | 47 |  |
| Cell-To-Cell Signaling and Interaction | binding    | binding of mononuclear leukocytes      | 1,82E-27 | CCL2, CCL3, CCL4, CCL5, CCL11, CCL19, CCL20, CCL21, CCR5, CD2, CD4, CD6, CD69, CD86, CD3E, CLEC10A, CXCL9, CXCL10, CXCL11, CXCL13, CXCR3, FYB, ICOS, ITGAL, ITGB2, ITK, KLRK1, LCK, LCP2, SELL, SELPLG, TAC1                                                                                                                                                                                              | 32 |  |
| Cell-To-Cell Signaling and Interaction | binding    | binding of normal cells                | 1,96E-26 | C3, CCL2, CCL3, CCL4, CCL5, CCL11, CCL19, CCL20, CCL21, CCR5, CD2, CD4, CD6, CD14, CD48, CD69, CD84, CD86, CD3E, CLEC10A, CR2, CXCL1, CXCL2, CXCL9, CXCL10, CXCL11, CXCL13, CXCR3, DARC, FCGR3B, FGR, FPR1, FYB, HCK, ICOS, IL1B, ITGAL, ITGAX, ITGB2, ITK, KLRK1, LCK, LCP2, LSP1, LTF, PTPN6, PTPRC, SELL, SELPLG, TAC1                                                                                 | 50 |  |
| Cell-To-Cell Signaling and Interaction | binding    | binding of cells                       | 4,59E-26 | C3, CCL2, CCL3, CCL4, CCL5, CCL11, CCL19, CCL20, CCL21, CCR5, CD2, CD4, CD6, CD14, CD28, CD48, CD69, CD84, CD86, CD3E, CLEC10A, CLEC7A, CR2, CXCL1, CXCL2, CXCL9, CXCL10, CXCL11, CXCL13, CXCR3, DARC, FCGR3B, FGR, FPR1, FYB, GZMB, HCK, HS3ST1, ICOS, IGKC, IL18RAP, IL1B, IL27RA, IL2RG, ITGAL, ITGAX, ITGB2, ITK, KLRK1, LCK, LCP2, LSP1, LTF, LY96, PTPN6, PTPRC, RHOH, SELL, SELPLG, TAC1, TNFRSF17 | 61 |  |
| Cell-To-Cell Signaling and Interaction | binding    | binding of                             | 1,78E-23 | CCL4, CCL5, CCL19, CCL20, CCL21, CD2, CD6, CD69, CD86, CD3E, CLEC10A,                                                                                                                                                                                                                                                                                                                                     | 27 |  |

|                                        |          |                                     |          |                                                                                                                                                                                                                                                                                                                                                              |    |
|----------------------------------------|----------|-------------------------------------|----------|--------------------------------------------------------------------------------------------------------------------------------------------------------------------------------------------------------------------------------------------------------------------------------------------------------------------------------------------------------------|----|
| Cell Signaling and Interaction         |          | lymphocytes                         |          | CXCL9, CXCL10, CXCL11, CXCL13, CXCR3, FYB, ICOS, ITGAL, ITGB2, ITK, KLRK1, LCK, LCP2, SELL, SELPLG, TAC1                                                                                                                                                                                                                                                     |    |
| Cell-To-Cell Signaling and Interaction | binding  | binding of eukaryotic cells         | 1,15E-22 | C3, CCL2, CCL3, CCL4, CCL5, CCL11, CCL19, CCL20, CCL21, CCR5, CD2, CD4, CD6, CD14, CD48, CD69, CD84, CD86, CD3E, CLEC10A, CLEC7A, CR2, CXCL1, CXCL2, CXCL9, CXCL10, CXCL11, CXCL13, CXCR3, DARC, FCGR3B, FGR, FPR1, FYB, HCK, ICOS, IGKC, IL1B, IL27RA, IL2RG, ITGAL, ITGAX, ITGB2, ITK, KLRK1, LCK, LCP2, LSP1, LTF, PTPN6, PTPRC, RHOH, SELL, SELPLG, TAC1 | 55 |
| Cell-To-Cell Signaling and Interaction | binding  | binding of T lymphocytes            | 3,71E-20 | CCL4, CCL5, CCL21, CD2, CD6, CD69, CD86, CLEC10A, CXCL9, CXCL10, CXCL11, CXCR3, FYB, ICOS, ITGAL, ITGB2, ITK, KLRK1, LCK, LCP2, SELPLG, TAC1                                                                                                                                                                                                                 | 22 |
| Cell-To-Cell Signaling and Interaction | binding  | binding of phagocytes               | 6,86E-14 | C3, CD2, CD14, CD69, CLEC10A, CXCL2, CXCL10, FCGR3B, FGR, FPR1, HCK, ITGAL, ITGB2, LSP1, PTPN6, PTPRC, SELL, SELPLG                                                                                                                                                                                                                                          | 18 |
| Cell-To-Cell Signaling and Interaction | binding  | binding of granulocytes             | 1,69E-11 | C3, CCL5, CCL11, CXCL2, CXCL10, FCGR3B, FGR, HCK, ITGB2, LSP1, LTF, PTPN6, SELL, SELPLG                                                                                                                                                                                                                                                                      | 14 |
| Cell-To-Cell Signaling and Interaction | binding  | binding of lymphatic system cells   | 2,49E-11 | C3, CCL5, CCL11, CR2, CXCL2, CXCL10, FCGR3B, FGR, HCK, ITGB2, LSP1, LTF, PTPN6, SELL, SELPLG                                                                                                                                                                                                                                                                 | 15 |
| Cell-To-Cell Signaling and Interaction | binding  | binding of neutrophils              | 7,08E-10 | C3, CXCL2, CXCL10, FCGR3B, FGR, HCK, ITGB2, LSP1, PTPN6, SELL, SELPLG                                                                                                                                                                                                                                                                                        | 11 |
| Cell-To-Cell Signaling and Interaction | binding  | binding of antigen presenting cells | 1,71E-08 | CD2, CD4, CD6, CD14, CD69, CLEC10A, FPR1, FYB, ITGAL, LCK, PTPRC                                                                                                                                                                                                                                                                                             | 11 |
| Cell-To-Cell Signaling and Interaction | binding  | binding of tumor cell lines         | 1,05E-07 | CCR5, CD4, CD14, CLEC7A, CXCL9, CXCL10, CXCR3, FYB, IL1B, IL27RA, ITGAL, ITGB2, KLRK1, LCK, LTF, RHOH, SELL, SELPLG                                                                                                                                                                                                                                          | 18 |
| Cell-To-Cell Signaling and Interaction | adhesion | adhesion of blood cells             | 7,03E-27 | BTK, C3, C1QA, CCL2, CCL3, CCL4, CCL5, CCL11, CCL19, CCL20, CCL21, CD2, CD19, CD28, CD48, CORO1A, CR2, CSF3R, CXCL2, CXCL9, CXCL10, CXCL11, CXCR3, FCER1G, FGR, FYB, GZMB, HCK, ICAM2, ICOS, IGHM, IL1B, ITGAL, ITGAX, ITGB2, ITK, LCP1, PTPRC, RAC2, RASSF5, RGS1, S100A8, SAA1, SELL, SELPLG, TAC1, VAV1                                                   | 47 |
| Cell-To-Cell Signaling and Interaction | adhesion | adhesion of leukocytes              | 3,38E-24 | BTK, C3, C1QA, CCL2, CCL3, CCL4, CCL5, CCL11, CCL19, CCL20, CCL21, CD2, CD19, CD28, CD48, CORO1A, CSF3R, CXCL2, CXCL9, CXCL11, CXCR3, FGR, FYB, HCK, ICAM2, ICOS, IL1B, ITGAL, ITGAX, ITGB2, ITK, LCP1, PTPRC, RAC2, RASSF5, RGS1, S100A8, SELL, SELPLG, TAC1, VAV1                                                                                          | 41 |
| Cell-To-Cell Signaling and Interaction | adhesion | adhesion of normal cells            | 3,88E-23 | AMICA1, BTK, C3, C1QA, CCL2, CCL3, CCL4, CCL5, CCL11, CCL19, CCL20, CCL21, CD2, CD19, CD28, CD48, CD8A, CORO1A, CR2, CSF3R, CXCL2, CXCL9, CXCL10, CXCL11, CXCR3, FCER1G, FGR, FYB, GZMB, HCK, ICAM2, ICOS, IGHM, IL1B, ITGAL, ITGAX, ITGB2, ITK, LCP1, PTPRC, RAC2, RASSF5, RGS1, S100A8, SAA1, SELL, SELPLG, TAC1, VAV1                                     | 49 |
| Cell-To-Cell Signaling and Interaction | adhesion | adhesion of mononuclear leukocytes  | 1,46E-22 | BTK, CCL2, CCL3, CCL4, CCL5, CCL11, CCL19, CCL20, CCL21, CD2, CD19, CD28, CD48, CXCL9, CXCL11, CXCR3, FYB, ICAM2, ICOS, IL1B, ITGAL, ITGAX, ITGB2, ITK, LCP1, RASSF5, RGS1, SELL, SELPLG, TAC1, VAV1                                                                                                                                                         | 31 |
| Cell-To-Cell Signaling and Interaction | adhesion | adhesion of                         | 6,00E-21 | ADAM8, AMICA1, BTK, C3, C1ORF38, C1QA, CCL2, CCL3, CCL4, CCL5, CCL11,                                                                                                                                                                                                                                                                                        | 71 |

|                                        |             |                                       |          |                                                                                                                                                                                                                                                                                                                                                                                                     |    |
|----------------------------------------|-------------|---------------------------------------|----------|-----------------------------------------------------------------------------------------------------------------------------------------------------------------------------------------------------------------------------------------------------------------------------------------------------------------------------------------------------------------------------------------------------|----|
| Cell Signaling and Interaction         |             | cells                                 |          | CCL19, CCL20, CCL21, CCR2, CCR5, CD2, CD4, CD19, CD28, CD48, CD84, CD96, CD8A, CLEC7A, CORO1A, CR2, CSF3R, CXCL2, CXCL9, CXCL10, CXCL11, CXCR3, CYTIP, EMB, EMR1, FCER1G, FGB, FGR, FYB, GZMB, HCK, ICAM2, ICOS, IGHA1, IGHM, IL1B, ITGAL, ITGAX, ITGB2, ITK, LCK, LCP1, LTF, MYO1F, PARVG, PCDH10, PTPRC, RAC2, RASSF5, RGS1, S100A8, SAA1, SELL, SELPLG, ST8SIA4, STAT1, TAC1, TIMP1, VAV1, ZAP70 |    |
| Cell-To-Cell Signaling and Interaction | adhesion    | adhesion of lymphocytes               | 5,86E-20 | BTK, CCL2, CCL3, CCL4, CCL11, CCL19, CCL20, CCL21, CD2, CD19, CD28, CD48, CXCL9, CXCL11, CXCR3, FYB, ICAM2, ICOS, ITGAL, ITGB2, ITK, RASSF5, RGS1, SELL, SELPLG, TAC1                                                                                                                                                                                                                               | 26 |
| Cell-To-Cell Signaling and Interaction | adhesion    | adhesion of eukaryotic cells          | 6,87E-20 | AMICA1, BTK, C3, C1QA, CCL2, CCL3, CCL4, CCL5, CCL11, CCL19, CCL20, CCL21, CD2, CD4, CD19, CD28, CD48, CD8A, CORO1A, CR2, CSF3R, CXCL2, CXCL9, CXCL10, CXCL11, CXCR3, CYTIP, FCER1G, FGR, FYB, GZMB, HCK, ICAM2, ICOS, IGHM, IL1B, ITGAL, ITGAX, ITGB2, ITK, LCP1, LTF, PARVG, PTPRC, RAC2, RASSF5, RGS1, S100A8, SAA1, SELL, SELPLG, TAC1, TIMP1, VAV1, ZAP70                                      | 55 |
| Cell-To-Cell Signaling and Interaction | adhesion    | adhesion of T lymphocytes             | 9,88E-17 | CCL3, CCL4, CCL11, CCL19, CCL20, CCL21, CD2, CD48, CXCL9, CXCL11, CXCR3, FYB, ICAM2, ICOS, ITGAL, ITGB2, ITK, RASSF5, SELL, SELPLG, TAC1                                                                                                                                                                                                                                                            | 21 |
| Cell-To-Cell Signaling and Interaction | adhesion    | adhesion of granulocytes              | 1,87E-11 | C3, CCL11, CORO1A, CSF3R, CXCL2, FGR, HCK, IL1B, ITGAL, ITGAX, ITGB2, LCP1, S100A8, SELL, SELPLG, VAV1                                                                                                                                                                                                                                                                                              | 16 |
| Cell-To-Cell Signaling and Interaction | adhesion    | adhesion of neutrophils               | 2,10E-09 | CORO1A, CSF3R, CXCL2, IL1B, ITGAL, ITGAX, ITGB2, LCP1, S100A8, SELL, SELPLG, VAV1                                                                                                                                                                                                                                                                                                                   | 12 |
| Cell-To-Cell Signaling and Interaction | adhesion    | adhesion of endothelial cells         | 4,78E-08 | AMICA1, C1QA, CCL2, CCL3, CCL4, CCL5, ICAM2, IL1B, ITGAL, ITGAX, ITGB2, SELL, SELPLG                                                                                                                                                                                                                                                                                                                | 13 |
| Cell-To-Cell Signaling and Interaction | adhesion    | adhesion of lymphoma cell lines       | 1,07E-07 | CCL2, CCL21, CD4, CR2, CXCL2, ITGAL, ITGAX, ITGB2, PARVG                                                                                                                                                                                                                                                                                                                                            | 9  |
| Cell-To-Cell Signaling and Interaction | recruitment | recruitment of leukocytes             | 6,53E-26 | BTLA, C3, C3AR1, CCL2, CCL3, CCL4, CCL5, CCL11, CCL19, CCL20, CCL21, CCR2, CCR5, CCR7, CD4, CD14, CD19, CD28, CD8A, CR2, CXCL1, CXCL2, CXCL9, CXCL10, CXCR3, DARC, IGHG1, IL1B, IL1RN, ITGB2, LSP1, LYZ, SELL, SELPLG, SLPI, TAC1, TLR7, UCP2                                                                                                                                                       | 38 |
| Cell-To-Cell Signaling and Interaction | recruitment | recruitment of cells                  | 3,25E-25 | BTLA, C3, C3AR1, CCL2, CCL3, CCL4, CCL5, CCL11, CCL19, CCL20, CCL21, CCR2, CCR5, CCR7, CD4, CD14, CD19, CD28, CD8A, CR2, CXCL1, CXCL2, CXCL9, CXCL10, CXCL13, CXCR3, DARC, IGHG1, IL1B, IL1RN, ITGB2, LSP1, LYZ, SELL, SELPLG, SLPI, TAC1, TLR7, TNFRSF1B, UCP2                                                                                                                                     | 40 |
| Cell-To-Cell Signaling and Interaction | recruitment | recruitment of normal cells           | 1,14E-24 | BTLA, C3, C3AR1, CCL2, CCL3, CCL4, CCL5, CCL11, CCL19, CCL20, CCL21, CCR2, CCR5, CCR7, CD4, CD14, CD19, CD28, CD8A, CR2, CXCL1, CXCL2, CXCL9, CXCL10, CXCL13, CXCR3, DARC, IGHG1, IL1B, IL1RN, ITGB2, LSP1, LYZ, SELL, SELPLG, SLPI, TAC1, TLR7, UCP2                                                                                                                                               | 39 |
| Cell-To-Cell Signaling and Interaction | recruitment | recruitment of lymphatic system cells | 3,62E-21 | BTLA, C3, C3AR1, CCL2, CCL3, CCL4, CCL5, CCL11, CCL19, CCL20, CCR2, CD14, CD19, CD28, CD8A, CR2, CXCL1, CXCL2, CXCL9, CXCL10, CXCL13, DARC, IGHG1, IL1B, IL1RN, LSP1, LYZ, SLPI                                                                                                                                                                                                                     | 28 |
| Cell-To-Cell Signaling                 | recruitment | recruitment of granulocyte            | 2,47E-20 | BTLA, C3, C3AR1, CCL2, CCL3, CCL4, CCL5, CCL11, CCL19, CCL20, CCR2, CD14, CD19, CD28, CD8A, CR2, CXCL1, CXCL2, CXCL9, CXCL10, DARC, IGHG1, IL1B, IL1RN, LSP1, LYZ, SLPI                                                                                                                                                                                                                             | 27 |



|                                                 |             |                                         |          |                                                                                                                                                                                                                        |    |  |
|-------------------------------------------------|-------------|-----------------------------------------|----------|------------------------------------------------------------------------------------------------------------------------------------------------------------------------------------------------------------------------|----|--|
| and<br>Interaction                              |             | s                                       |          |                                                                                                                                                                                                                        |    |  |
| Cell-To-Cell<br>Signaling<br>and<br>Interaction | recruitment | recruitment of phagocytes               | 7,71E-18 | C3AR1, CCL2, CCL3, CCL4, CCL5, CCL19, CCL20, CCR2, CCR5, CD14, CD19, CD28, CD8A, CR2, CXCL1, CXCL2, CXCL10, DARC, IL1B, IL1RN, ITGB2, LSP1, LYZ, SLPI, UCP2                                                            | 25 |  |
| Cell-To-Cell<br>Signaling<br>and<br>Interaction | recruitment | recruitment of neutrophils              | 4,34E-17 | C3AR1, CCL2, CCL3, CCL4, CCL5, CCL19, CCL20, CCR2, CD14, CD19, CD28, CD8A, CR2, CXCL1, CXCL2, CXCL10, DARC, IL1B, IL1RN, LSP1, LYZ, SLPI                                                                               | 22 |  |
| Cell-To-Cell<br>Signaling<br>and<br>Interaction | recruitment | recruitment of lymphocytes              | 5,29E-14 | CCL2, CCL3, CCL4, CCL5, CCL11, CCL19, CCL20, CCL21, CCR2, CCR7, CD4, CD8A, CXCL9, CXCL10, CXCR3, IL1B, SELL                                                                                                            | 17 |  |
| Cell-To-Cell<br>Signaling<br>and<br>Interaction | recruitment | recruitment of T lymphocytes            | 1,48E-12 | CCL2, CCL3, CCL4, CCL5, CCL11, CCL19, CCL20, CCL21, CCR2, CCR7, CD4, CD8A, CXCL9, CXCL10                                                                                                                               | 14 |  |
| Cell-To-Cell<br>Signaling<br>and<br>Interaction | recruitment | recruitment of antigen presenting cells | 3,76E-11 | C3AR1, CCL2, CCL3, CCL4, CCL5, CCL19, CCL20, CCR2, CCR5, CD8A, CXCL10, ITGB2, LSP1, UCP2                                                                                                                               | 14 |  |
| Cell-To-Cell<br>Signaling<br>and<br>Interaction | recruitment | recruitment of dendritic cells          | 4,81E-10 | CCL2, CCL3, CCL4, CCL5, CCL19, CCL20, CCR2, CXCL10                                                                                                                                                                     | 8  |  |
| Cell-To-Cell<br>Signaling<br>and<br>Interaction | recruitment | recruitment of monocytes                | 6,40E-09 | CCL2, CCL3, CCL4, CCL5, CCL19, CCL20, CCR2, CXCL10, IL1B                                                                                                                                                               | 9  |  |
| Cell-To-Cell<br>Signaling<br>and<br>Interaction | recruitment | recruitment of macrophages              | 1,71E-08 | C3AR1, CCL2, CCL3, CCL4, CCR2, CCR5, CD8A, CXCL10, ITGB2, LSP1, UCP2                                                                                                                                                   | 11 |  |
| Cell-To-Cell<br>Signaling<br>and<br>Interaction | interaction | interaction of mononuclear leukocytes   | 1,73E-24 | CCL4, CCL5, CCL11, CCL21, CCR5, CCR7, CD2, CD4, CD6, CD14, CD28, CD69, CD86, CLEC10A, CXCL9, CXCL10, CXCL11, CXCR3, FYB, ICOS, ITGAL, ITGB2, ITK, KLRK1, LCK, LCP2, SELPLG, TAC1                                       | 28 |  |
| Cell-To-Cell<br>Signaling<br>and<br>Interaction | interaction | interaction of T lymphocytes            | 1,25E-23 | CCL4, CCL5, CCL11, CCL21, CCR5, CCR7, CD2, CD4, CD6, CD28, CD69, CD86, CLEC10A, CXCL9, CXCL10, CXCL11, CXCR3, FYB, ICOS, ITGAL, ITGB2, ITK, KLRK1, LCK, LCP2, SELPLG, TAC1                                             | 27 |  |
| Cell-To-Cell<br>Signaling<br>and<br>Interaction | interaction | interaction of cells                    | 4,05E-22 | CCL4, CCL5, CCL11, CCL21, CCR5, CCR7, CD2, CD4, CD6, CD14, CD28, CD69, CD86, CLEC10A, CXCL9, CXCL10, CXCL11, CXCR3, FYB, ICOS, ITGAL, ITGB2, ITK, KLRK1, LCK, LCP2, PCDH10, SELPLG, TAC1                               | 29 |  |
| Cell-To-Cell<br>Signaling<br>and<br>Interaction | response    | response of leukocytes                  | 2,10E-24 | CCL3, CCL5, CCL19, CCL21, CCR2, CCR5, CD4, CD14, CD22, CD28, CD86, CD1D, CD3E, CLEC7A, CSF2RB, CXCL9, CXCL11, DAPP1, FPR1, GZMB, ICOS, IL10RA, IL12RB1, IL27RA, ITK, LAX1, LTB, PSMB10, RARRES3, SELPLG, STAT4, TLR7   | 32 |  |
| Cell-To-Cell<br>Signaling                       | response    | response of cells                       | 8,86E-23 | BTK, CCL3, CCL5, CCL19, CCL21, CCR2, CCR5, CD4, CD14, CD19, CD22, CD28, CD86, CD1D, CD3E, CD5L, CLEC5A, CLEC7A, CSF2RB, CXCL9, CXCL11, DAPP1, FAIM3, FPR1, GNLY, GZMA, GZMB, ICOS, IL10RA, IL12RB1, IL27RA, ITK, LAX1, | 52 |  |

|                                        |            |                                        |          |                                                                                                                                                                                                                                          |    |
|----------------------------------------|------------|----------------------------------------|----------|------------------------------------------------------------------------------------------------------------------------------------------------------------------------------------------------------------------------------------------|----|
| and Interaction                        |            |                                        |          | LSP1, LTB, LY96, MND A, NCF1, NOD2, PRF1, PSMB10, RARRES3, S100A8, SELPLG, STAT1, STAT4, TCIRG1, TLR7, TLR8 (includes EG:51311), TRAT1, TYROBP, UNC93B1                                                                                  |    |
| Cell-To-Cell Signaling and Interaction | response   | response of eukaryotic cells           | 1,70E-22 | CCL3, CCL5, CCL19, CCL21, CCR2, CCR5, CD4, CD14, CD22, CD28, CD86, CD1D, CD3E, CLEC7A, CSF2RB, CXCL9, CXCL11, DAPP1, FPR1, GZMB, ICOS, IL10RA, IL12RB1, IL27RA, ITK, LAX1, LTB, LY96, NOD2, PSMB10, RARRES3, S100A8, SELPLG, STAT4, TLR7 | 35 |
| Cell-To-Cell Signaling and Interaction | response   | response of normal cells               | 6,04E-22 | CCL3, CCL5, CCL19, CCL21, CCR2, CCR5, CD4, CD14, CD22, CD28, CD86, CD1D, CD3E, CLEC7A, CSF2RB, CXCL9, CXCL11, DAPP1, FPR1, GZMB, ICOS, IL10RA, IL12RB1, IL27RA, ITK, LAX1, LTB, PSMB10, RARRES3, S100A8, SELPLG, STAT4, TLR7             | 33 |
| Cell-To-Cell Signaling and Interaction | response   | response of mononuclear leukocytes     | 7,65E-20 | CCL19, CCL21, CCR2, CCR5, CD4, CD22, CD28, CD86, CD1D, CD3E, CLEC7A, CXCL9, CXCL11, DAPP1, FPR1, GZMB, ICOS, IL10RA, IL12RB1, IL27RA, ITK, LAX1, LTB, PSMB10, SELPLG, STAT4                                                              | 26 |
| Cell-To-Cell Signaling and Interaction | response   | response of lymphocytes                | 6,71E-16 | CCL19, CCL21, CD4, CD22, CD28, CD86, CD1D, CD3E, CXCL9, CXCL11, DAPP1, GZMB, ICOS, IL10RA, IL12RB1, IL27RA, ITK, LAX1, LTB, PSMB10, SELPLG, STAT4                                                                                        | 22 |
| Cell-To-Cell Signaling and Interaction | response   | T cell response                        | 7,24E-14 | CCL19, CCL21, CD4, CD28, CD86, CD1D, CD3E, CXCL9, CXCL11, ICOS, IL10RA, IL12RB1, IL27RA, ITK, LAX1, LTB, PSMB10, SELPLG, STAT4                                                                                                           | 19 |
| Cell-To-Cell Signaling and Interaction | attraction | attraction of leukocytes               | 7,92E-22 | C3, CCL2, CCL3, CCL4, CCL5, CCL11, CCL18, CCL19, CCL20, CCL21, CCR5, CXCL1, CXCL6, CXCL9, CXCL10, CXCL11, CXCL13, CXCR3, IL16, IL12RB1, IL1B, XCL1                                                                                       | 22 |
| Cell-To-Cell Signaling and Interaction | attraction | attraction of mononuclear leukocytes   | 4,31E-19 | CCL2, CCL3, CCL4, CCL5, CCL11, CCL18, CCL19, CCL21, CCR5, CXCL9, CXCL10, CXCL11, CXCL13, CXCR3, IL16, IL1B, XCL1                                                                                                                         | 17 |
| Cell-To-Cell Signaling and Interaction | attraction | attraction of lymphocytes              | 1,36E-18 | CCL2, CCL3, CCL4, CCL5, CCL11, CCL18, CCL19, CCL21, CCR5, CXCL9, CXCL10, CXCL11, CXCL13, CXCR3, IL16, XCL1                                                                                                                               | 16 |
| Cell-To-Cell Signaling and Interaction | attraction | attraction of antigen presenting cells | 8,03E-15 | CCL2, CCL3, CCL4, CCL5, CCL19, CCL20, CCL21, CXCL9, CXCL10, CXCL11, CXCR3, IL12RB1, IL1B                                                                                                                                                 | 13 |
| Cell-To-Cell Signaling and Interaction | attraction | attraction of phagocytes               | 8,03E-15 | CCL2, CCL3, CCL4, CCL5, CCL11, CXCL1, CXCL6, CXCL9, CXCL10, CXCR3, IL12RB1, IL1B, XCL1                                                                                                                                                   | 13 |
| Cell-To-Cell Signaling and Interaction | attraction | attraction of T lymphocytes            | 3,00E-13 | CCL2, CCL4, CCL5, CCL11, CCL19, CCL21, CCR5, CXCL9, CXCL10, CXCL11, IL16, XCL1                                                                                                                                                           | 12 |
| Cell-To-Cell Signaling and Interaction | attraction | attraction of macrophages              | 3,94E-11 | CCL2, CCL3, CCL4, CCL5, CXCL9, CXCR3, IL12RB1, IL1B                                                                                                                                                                                      | 8  |
| Cell-To-Cell                           | attraction | attraction of monocytes                | 2,68E-09 | CCL2, CCL3, CCL4, CCL5, CXCL9, CXCL10, IL1B                                                                                                                                                                                              | 7  |

|                                                                     |                 |                                             |          |                                                                                                                                         |    |
|---------------------------------------------------------------------|-----------------|---------------------------------------------|----------|-----------------------------------------------------------------------------------------------------------------------------------------|----|
| Signaling and Interaction<br>Cell-To-Cell Signaling and Interaction | attraction      | attraction of granulocytes                  | 2,91E-09 | CCL2, CCL3, CCL4, CCL5, CCL11, CXCL1, CXCL6, CXCL10, XCL1                                                                               | 9  |
| Cell-To-Cell Signaling and Interaction                              | attraction      | attraction of memory T lymphocytes          | 4,36E-09 | CCL4, CCL5, CCL11, CXCL9, CXCL10, CXCL11                                                                                                | 6  |
| Cell-To-Cell Signaling and Interaction                              | attraction      | attraction of dendritic cells               | 3,57E-08 | CCL5, CCL19, CCL20, CCL21, CXCL9, CXCL10, CXCL11                                                                                        | 7  |
| Cell-To-Cell Signaling and Interaction                              | chemoattraction | chemoattraction of leukocytes               | 2,34E-16 | C3, CCL2, CCL3, CCL4, CCL5, CCL18, CCL19, CCL20, CXCL1, CXCL9, CXCL10, CXCL13, CXCR3, IL16, IL12RB1, XCL1                               | 16 |
| Cell-To-Cell Signaling and Interaction                              | chemoattraction | chemoattraction of normal cells             | 4,58E-16 | C3, CCL2, CCL3, CCL4, CCL5, CCL18, CCL19, CCL20, CXCL1, CXCL9, CXCL10, CXCL13, CXCR3, IL16, IL12RB1, IL1B, XCL1                         | 17 |
| Cell-To-Cell Signaling and Interaction                              | chemoattraction | chemoattraction of lymphocytes              | 3,48E-12 | CCL2, CCL3, CCL4, CCL5, CCL18, CXCL9, CXCL10, CXCL13, CXCR3, IL16                                                                       | 10 |
| Cell-To-Cell Signaling and Interaction                              | chemoattraction | chemoattraction of antigen presenting cells | 8,00E-11 | CCL2, CCL3, CCL4, CCL5, CCL19, CCL20, CXCL9, CXCR3, IL12RB1                                                                             | 9  |
| Cell-To-Cell Signaling and Interaction                              | chemoattraction | chemoattraction of macrophages              | 1,29E-10 | CCL2, CCL3, CCL4, CCL5, CXCL9, CXCR3, IL12RB1                                                                                           | 7  |
| Cell-To-Cell Signaling and Interaction                              | chemoattraction | chemoattraction of phagocytes               | 4,55E-10 | CCL2, CCL3, CCL4, CCL5, CXCL1, CXCL9, CXCR3, IL12RB1, XCL1                                                                              | 9  |
| Cell-To-Cell Signaling and Interaction                              | selection       | selection of lymphocytes                    | 2,34E-16 | CD4, CD19, CD28, CD1D, CD3D, CD3E, DOCK2, HLA-DOA, ITK, PTPRC, RHOH, SIT1, TNFRSF25, TRAT1, VAV1, ZAP70                                 | 16 |
| Cell-To-Cell Signaling and Interaction                              | selection       | selection of T lymphocytes                  | 3,41E-16 | CD4, CD28, CD1D, CD3D, CD3E, DOCK2, HLA-DOA, ITK, PTPRC, RHOH, SIT1, TNFRSF25, TRAT1, VAV1, ZAP70                                       | 15 |
| Cell-To-Cell Signaling and Interaction                              | selection       | selection of thymocytes                     | 1,11E-08 | CD28, HLA-DOA, ITK, RHOH, SIT1, TNFRSF25, TRAT1                                                                                         | 7  |
| Cell-To-Cell                                                        | phagocytosis    | phagocytosis of cells                       | 7,23E-12 | C3, C1QA, CD4, CD14, CORO1A, CSF2RB, CSF3R, CXCL10, DEF6, FCER1G, FCGR3B, FGR, HCK, ITGAX, ITGB2, PRKCB, PTPN6, RAC2, SELPLG, VAV1, WAS | 21 |

|                           |              |                    |                                       |          |                                                                                                                                                                                                      |    |
|---------------------------|--------------|--------------------|---------------------------------------|----------|------------------------------------------------------------------------------------------------------------------------------------------------------------------------------------------------------|----|
| Signaling and Interaction | Cell-To-Cell | phagocytosis       | phagocytosis of eukaryotic cells      | 7,62E-09 | CD14, CORO1A, CSF2RB, CSF3R, CXCL10, DEF6, FCGR3B, FGR, HCK, ITGB2, PRKCB, PTPN6, RAC2, SELPLG, VAV1, WAS                                                                                            | 16 |
| Signaling and Interaction | Cell-To-Cell | signaling          | signaling of leukocytes               | 2,65E-10 | CD14, CD22, CLEC7A, IL2RB, IL2RG, ITGB2, LCP2, SH2D1A, SLAMF1                                                                                                                                        | 9  |
| Signaling and Interaction | Cell-To-Cell | signaling          | signaling of cells                    | 6,00E-10 | C1QA, CCL3, CCL4, CCL5, CCL18, CCL20, CCL21, CCR5, CD14, CD22, CLEC7A, CSF1R, CXCL6, CXCL9, CXCL10, CXCL11, CXCL13, IL10RA, IL1B, IL2RB, IL2RG, ITGB2, LCP2, LTB, SH2D1A, SIRPG, SLAMF1, STAT1, XCL1 | 29 |
| Signaling and Interaction | Cell-To-Cell | signaling          | signaling of lymphocytes              | 2,05E-08 | CD22, IL2RB, IL2RG, ITGB2, LCP2, SH2D1A, SLAMF1                                                                                                                                                      | 7  |
| Signaling and Interaction | Cell-To-Cell | stimulation        | stimulation of eukaryotic cells       | 4,27E-10 | C3, CCL5, CCL11, CCL20, CD2, CD4, CD28, CD86, CD1D, CD8A, FGD3, ICOS, IL1B, IL2RB, KLRK1, LTF, PTPRC, SLAMF1, TAC1, TNFRSF25, TNFSF13B                                                               | 21 |
| Signaling and Interaction | Cell-To-Cell | stimulation        | stimulation of leukocytes             | 2,52E-09 | C3, CCL5, CCL11, CCL20, CD2, CD28, CD86, CD1D, ICOS, IL1B, KLRK1, PTPRC, SLAMF1, TAC1, TNFRSF25, TNFSF13B                                                                                            | 16 |
| Signaling and Interaction | Cell-To-Cell | stimulation        | stimulation of normal cells           | 2,94E-09 | C3, CCL5, CCL11, CCL20, CD2, CD4, CD28, CD86, CD1D, FGD3, ICOS, IL1B, KLRK1, LTF, PTPRC, SLAMF1, TAC1, TNFRSF25, TNFSF13B                                                                            | 19 |
| Signaling and Interaction | Cell-To-Cell | stimulation        | stimulation of T lymphocytes          | 4,02E-08 | C3, CD2, CD28, CD86, CD1D, ICOS, KLRK1, PTPRC, SLAMF1, TNFRSF25, TNFSF13B                                                                                                                            | 11 |
| Signaling and Interaction | Cell-To-Cell | stimulation        | stimulation of mononuclear leukocytes | 5,28E-08 | C3, CCL20, CD2, CD28, CD86, CD1D, ICOS, KLRK1, PTPRC, SLAMF1, TNFRSF25, TNFSF13B                                                                                                                     | 12 |
| Signaling and Interaction | Cell-To-Cell | positive selection | positive selection of lymphocytes     | 5,69E-09 | CD4, ITK, RHOH, SIT1, TRAT1, VAV1, ZAP70                                                                                                                                                             | 7  |
| Signaling and Interaction | Cell-To-Cell | positive selection | positive selection of T lymphocytes   | 6,77E-08 | CD4, ITK, RHOH, SIT1, TRAT1, VAV1                                                                                                                                                                    | 6  |
| Signaling and Interaction | Cell-To-Cell | attachment         | attachment of leukocytes              | 1,34E-08 | CSF2RB, ICAM2, IL1B, ITGAL, ITGAX, ITGB2, SELL, VAV1                                                                                                                                                 | 8  |
| Hematological             | Cell-To-Cell | activation         | activation of leukocytes              | 7,25E-61 | ADA, BTK, C3, C1QA, C3AR1, CCL2, CCL3, CCL4, CCL5, CCL11, CCR2, CD2, CD4, CD14, CD19, CD22, CD27, CD28, CD48, CD86, CD163, CD247, CD1C,                                                              | 99 |

|                                               |            |                                        |          |                                                                                                                                                                                                                                                                                                                                                                                                                                                                                                                                                                       |    |
|-----------------------------------------------|------------|----------------------------------------|----------|-----------------------------------------------------------------------------------------------------------------------------------------------------------------------------------------------------------------------------------------------------------------------------------------------------------------------------------------------------------------------------------------------------------------------------------------------------------------------------------------------------------------------------------------------------------------------|----|
| System Development and Function               |            |                                        |          | CD1D, CD1E, CD300A, CD3E, CD8A, CLEC4C, CLEC5A, CLEC7A, CORO1A, CR2, CSF1R, CXCL1, CXCL6, CXCL9, CXCL10, DEF6, DOCK2, FCER1G, FPR1, FYB, GNLY, GZMA, GZMB, HCK, HLA-DMB, HLA-DOA, HLA-DQA1, HLA-DQB1, HLA-DRB1, ICOS, IGHG1, IGHM, IL16, IL12RB1, IL18RAP, IL1B, IL1RN, IL27RA, IL2RB, IMPDH1, ITGAL, ITGB2, ITK, JAK3, KLRK1, LAX1, LCK, LCN2, LCP2, LILRB1, LTB, LTF, LY96, NCF1C, POU2AF1, PRF1, PSMB9, PTPRC, SELL, SIRPG, SIT1, SLAMF1, SLAMF6, SLPI, STAT1, STAT4, TAC1, TCL1A, TLR7, TLR8 (includes EG:51311), TNFRSF17, TNFRSF1B, TNFSF13B, TYROBP, VAV1, WAS |    |
| Hematological System Development and Function | activation | activation of mononuclear leukocytes   | 1,47E-49 | ADA, BTK, C3, C1QA, C3AR1, CCL2, CCL3, CCL4, CCL5, CCL11, CCR2, CD2, CD4, CD14, CD19, CD22, CD27, CD28, CD48, CD86, CD163, CD247, CD1C, CD1D, CD1E, CD3E, CD8A, CLEC4C, CLEC5A, CLEC7A, CORO1A, CR2, DEF6, DOCK2, FCER1G, GZMA, GZMB, HLA-DRB1, ICOS, IGHG1, IGHM, IL12RB1, IL1B, IL1RN, IL27RA, IL2RB, IMPDH1, ITGAL, ITGB2, ITK, JAK3, KLRK1, LAX1, LCK, LILRB1, LTF, LY96, NCF1C, POU2AF1, PRF1, PTPRC, SIRPG, SIT1, SLAMF1, SLAMF6, STAT1, STAT4, TAC1, TCL1A, TLR7, TLR8 (includes EG:51311), TNFRSF17, TNFRSF1B, TNFSF13B, TYROBP, VAV1, WAS                    | 77 |
| Hematological System Development and Function | activation | activation of lymphocytes              | 7,12E-47 | ADA, BTK, C3, C1QA, C3AR1, CCL2, CCL3, CCL4, CCL5, CCL11, CCR2, CD2, CD4, CD19, CD22, CD27, CD28, CD48, CD86, CD247, CD1C, CD1D, CD1E, CD3E, CD8A, CLEC4C, CLEC7A, CORO1A, CR2, DEF6, DOCK2, FCER1G, GZMA, GZMB, HLA-DRB1, ICOS, IGHG1, IGHM, IL12RB1, IL1B, IL1RN, IL27RA, IL2RB, IMPDH1, ITGAL, ITGB2, ITK, JAK3, KLRK1, LAX1, LCK, LILRB1, LTF, NCF1C, POU2AF1, PRF1, PTPRC, SIRPG, SIT1, SLAMF1, SLAMF6, STAT1, STAT4, TAC1, TCL1A, TLR7, TLR8 (includes EG:51311), TNFRSF17, TNFRSF1B, TNFSF13B, TYROBP, VAV1, WAS                                               | 73 |
| Hematological System Development and Function | activation | activation of T lymphocytes            | 1,78E-36 | ADA, C3, C3AR1, CCL2, CCL3, CCL4, CCL5, CCL11, CCR2, CD2, CD4, CD28, CD48, CD86, CD247, CD1D, CD3E, CD8A, CLEC4C, CLEC7A, CORO1A, DEF6, DOCK2, FCER1G, GZMA, GZMB, HLA-DRB1, ICOS, IGHG1, IL1B, IL27RA, IL2RB, IMPDH1, ITGAL, ITGB2, ITK, JAK3, LAX1, LCK, LILRB1, NCF1C, PRF1, PTPRC, SIRPG, SIT1, SLAMF1, STAT1, STAT4, TAC1, TCL1A, TLR7, TLR8 (includes EG:51311), TNFRSF1B, TYROBP, VAV1, WAS                                                                                                                                                                    | 56 |
| Hematological System Development and Function | activation | activation of granulocytes             | 3,31E-17 | C3, CCL2, CCL3, CCL4, CCL5, CCL11, CD14, CXCL1, CXCL6, CXCL9, FPR1, IL16, IL18RAP, IL1B, IL1RN, ITGB2, LCN2, LTF, NCF1C, SELL, TAC1, VAV1                                                                                                                                                                                                                                                                                                                                                                                                                             | 22 |
| Hematological System Development and Function | activation | activation of neutrophils              | 1,03E-14 | C3, CCL2, CCL3, CCL4, CCL5, CD14, CXCL1, CXCL6, FPR1, IL18RAP, IL1B, IL1RN, LCN2, LTF, NCF1C, SELL, TAC1, VAV1                                                                                                                                                                                                                                                                                                                                                                                                                                                        | 18 |
| Hematological System Development and Function | activation | activation of antigen presenting cells | 9,47E-14 | CCL2, CCL3, CCL4, CCL5, CD4, CD86, CD1D, CSF1R, CXCL10, FCER1G, HCK, HLA-DMB, HLA-DOA, HLA-DQA1, HLA-DQB1, IGHM, IL1B, LTB, LTF, PSMB9, SLPI, STAT1, STAT4, TAC1, TLR7, TNFRSF1B                                                                                                                                                                                                                                                                                                                                                                                      | 26 |
| Hematological System Development and Function | activation | activation of phagocytes               | 1,23E-13 | C3, CCL2, CCL3, CCL4, CCL5, CD4, CD14, CSF1R, CXCL1, CXCL6, CXCL10, FCER1G, FPR1, HCK, IL18RAP, IL1B, IL1RN, LCN2, LTF, NCF1C, SELL, STAT1, STAT4, TAC1, VAV1                                                                                                                                                                                                                                                                                                                                                                                                         | 25 |
| Hematological System Development and Function | activation | activation of natural killer cells     | 1,63E-12 | CCL5, CD2, CD4, CD27, CD28, CD1D, IL12RB1, IL1B, IL1RN, IL2RB, ITGAL, ITGB2, KLRK1, LTF, PRF1, SLAMF6, STAT4, TAC1, TYROBP                                                                                                                                                                                                                                                                                                                                                                                                                                            | 19 |
| Hematological System Development and Function | activation | activation of mast cells               | 4,94E-11 | C3, CCL3, CCL5, CCR2, CD48, CD300A, FCER1G, FYB, IL27RA, LCP2, TAC1, TLR7, TLR8 (includes EG:51311)                                                                                                                                                                                                                                                                                                                                                                                                                                                                   | 13 |

|                                               |               |                                         |          |                                                                                                                                                                                                                                                                                                                                                                                                                                                                                                                                                                                                                                                                                        |    |
|-----------------------------------------------|---------------|-----------------------------------------|----------|----------------------------------------------------------------------------------------------------------------------------------------------------------------------------------------------------------------------------------------------------------------------------------------------------------------------------------------------------------------------------------------------------------------------------------------------------------------------------------------------------------------------------------------------------------------------------------------------------------------------------------------------------------------------------------------|----|
| Function                                      |               |                                         |          |                                                                                                                                                                                                                                                                                                                                                                                                                                                                                                                                                                                                                                                                                        |    |
| Hematological System Development and Function | activation    | activation of B lymphocytes             | 3,87E-10 | ADA, BTK, C1QA, CD19, CD22, CD86, CD8A, CR2, IGHG1, IGHM, LAX1, POU2AF1, PTPRC, TNFRSF17, TNFSF13B, VAV1                                                                                                                                                                                                                                                                                                                                                                                                                                                                                                                                                                               | 16 |
| Hematological System Development and Function | proliferation | proliferation of leukocytes             | 1,07E-52 | ADA, BTK, BTLA, CCL4, CCL20, CCR2, CCR5, CD2, CD4, CD6, CD14, CD19, CD22, CD27, CD28, CD37, CD48, CD84, CD86, CD247, CD1D, CD3E, CD3G, CD79A, CD8A, CLEC10A, CORO1A, CR2, CSF1R, CSF2RB, CSF3R, CYSLTR1, DEF6, DGKA, DOCK2, FYB, HCK, HLA-DRB1, ICOS, IDO1, IGHG1, IGHM, IGKC, IKZF1, IL10RA, IL1B, IL1RN, IL27RA, IL2RB, IL2RG, IL7R, IMPDH1, IRF1, IRF4, ISG20, ITGAL, ITGAX, ITGB2, ITK, JAK3, KLRK1, LCK, LCP2, LILRB1, LST1, LY86, LY96, MS4A1, MYB (includes EG:4602), PRKCB, PTPN6, PTPRC, RAC2, RUNX3, SASH3, SH2D1A, SH2D2A, SLAMF1, SLAMF7, SLPI, SPIB, STAT1, STAT4, TAC1, TCIRG1, TCL1A, TLR7, TNFRSF17, TNFRSF1B, TNFSF13B, TRD@, TYROBP, UBASH3A, VAV1, WAS, XCL1, ZAP70 | 97 |
| Hematological System Development and Function | proliferation | proliferation of mononuclear leukocytes | 7,87E-50 | ADA, BTK, BTLA, CCL4, CCR2, CCR5, CD2, CD4, CD6, CD14, CD19, CD22, CD27, CD28, CD37, CD48, CD84, CD86, CD247, CD1D, CD3E, CD3G, CD79A, CD8A, CLEC10A, CORO1A, CR2, CSF1R, CSF2RB, DEF6, DGKA, DOCK2, FYB, HCK, HLA-DRB1, ICOS, IDO1, IGHG1, IGHM, IGKC, IKZF1, IL1B, IL1RN, IL27RA, IL2RB, IL2RG, IL7R, IMPDH1, IRF1, IRF4, ISG20, ITGAL, ITGAX, ITGB2, ITK, JAK3, KLRK1, LCK, LCP2, LILRB1, LST1, LY86, LY96, MS4A1, MYB (includes EG:4602), PRKCB, PTPN6, PTPRC, RAC2, RUNX3, SASH3, SH2D2A, SLAMF1, SLAMF7, SLPI, SPIB, STAT1, STAT4, TAC1, TCIRG1, TCL1A, TLR7, TNFRSF17, TNFRSF1B, TNFSF13B, TRD@, UBASH3A, VAV1, WAS, XCL1, ZAP70                                                | 92 |
| Hematological System Development and Function | proliferation | proliferation of lymphocytes            | 5,76E-49 | ADA, BTK, BTLA, CCL4, CCR2, CCR5, CD2, CD4, CD6, CD14, CD19, CD22, CD27, CD28, CD37, CD48, CD84, CD86, CD247, CD1D, CD3E, CD3G, CD79A, CD8A, CLEC10A, CORO1A, CR2, CSF2RB, DEF6, DGKA, DOCK2, FYB, HCK, HLA-DRB1, ICOS, IDO1, IGHG1, IGHM, IGKC, IKZF1, IL1B, IL1RN, IL27RA, IL2RB, IL2RG, IL7R, IMPDH1, IRF1, IRF4, ISG20, ITGAL, ITGAX, ITGB2, ITK, JAK3, KLRK1, LCK, LCP2, LILRB1, LST1, LY86, LY96, MS4A1, MYB (includes EG:4602), PRKCB, PTPN6, PTPRC, RAC2, RUNX3, SASH3, SH2D1A, SH2D2A, SLAMF1, SLAMF7, SLPI, SPIB, STAT1, STAT4, TAC1, TCIRG1, TCL1A, TLR7, TNFRSF17, TNFRSF1B, TNFSF13B, TRD@, UBASH3A, VAV1, WAS, XCL1, ZAP70                                               | 91 |
| Hematological System Development and Function | proliferation | proliferation of T lymphocytes          | 1,03E-31 | BTLA, CCL4, CCR2, CCR5, CD2, CD4, CD6, CD14, CD27, CD28, CD37, CD48, CD84, CD86, CD247, CD3E, CD3G, CD8A, CLEC10A, CORO1A, CSF2RB, DEF6, DGKA, DOCK2, FYB, HLA-DRB1, ICOS, IDO1, IGHG1, IGHM, IKZF1, IL1B, IL27RA, IL2RB, IL2RG, IL7R, ISG20, ITGAL, ITGAX, ITGB2, ITK, JAK3, KLRK1, LCK, LCP2, LILRB1, MYB (includes EG:4602), PTPN6, PTPRC, RAC2, RUNX3, SASH3, SH2D1A, SH2D2A, STAT1, STAT4, TCIRG1, TNFRSF1B, TNFSF13B, TRD@, UBASH3A, VAV1, WAS, XCL1, ZAP70                                                                                                                                                                                                                      | 65 |
| Hematological System Development and Function | proliferation | proliferation of B lymphocytes          | 1,89E-21 | ADA, BTK, BTLA, CD4, CD19, CD22, CD86, CD3E, CD79A, CD8A, CR2, HCK, IGHM, IGKC, IL1RN, IL2RG, IL7R, IRF4, LY86, LY96, MS4A1, PRKCB, PTPN6, PTPRC, SASH3, SLAMF1, SLAMF7, SLPI, SPIB, STAT1, TCIRG1, TCL1A, TLR7, TNFRSF17, TNFSF13B, VAV1                                                                                                                                                                                                                                                                                                                                                                                                                                              | 36 |
| Hematological System Development and Function | proliferation | proliferation of thymocytes             | 1,09E-08 | CD2, CD28, CD3E, IL1B, IL2RG, ITK, JAK3, LCP2, MYB (includes EG:4602), PTPN6, TNFRSF1B, WAS, ZAP70                                                                                                                                                                                                                                                                                                                                                                                                                                                                                                                                                                                     | 13 |
| Hematological System Development and Function | proliferation | proliferation of leukocyte cell lines   | 1,30E-08 | CD28, CD1D, CD3E, CD8A, CLEC7A, CSF1R, CSF2RB, CSF3R, CYSLTR1, HCK, IL10RA, IL12RB1, IL1B, IL2RB, IL2RG, IL7R, JAK3, MYB (includes EG:4602), PTPRC, TNFRSF1B                                                                                                                                                                                                                                                                                                                                                                                                                                                                                                                           | 20 |
| Hematological System Development              | quantity      | quantity of leukocytes                  | 3,47E-48 | ADA, ALOX5, BCL2A1, BTK, BTLA, C3, C1QA, CCL2, CCL3, CCL5, CCL11, CCL19, CCL21, CCR2, CCR7, CD4, CD19, CD22, CD27, CD28, CD69, CD86, CD247, CD1D, CD3D, CD3E, CD3G, CD79A, CD8A, CIITA, CR2, CSF1R, CSF2RB, CSF3R, CTSS, CXCL2, CXCL10, CXCL13, CXCR3, CXCR6 (includes EG:10663), CYTIP,                                                                                                                                                                                                                                                                                                                                                                                               | 88 |

|                                               |          |                                      |          |                                                                                                                                                                                                                                                                                                                                                                                                                                                                                                                                                                                                                                                      |    |
|-----------------------------------------------|----------|--------------------------------------|----------|------------------------------------------------------------------------------------------------------------------------------------------------------------------------------------------------------------------------------------------------------------------------------------------------------------------------------------------------------------------------------------------------------------------------------------------------------------------------------------------------------------------------------------------------------------------------------------------------------------------------------------------------------|----|
| ent and Function                              |          |                                      |          | DEF6, FCER1G, HLA-DQA1, ICOS, IGHM, IGKC, IKZF1, IL10RA, IL12RB1, IL1B, IL27RA, IL2RB, IL2RG, IL7R, IRF1, IRF4, ITGB2, ITK, JAK3, LCK, LCP2, LSP1, LTB, MS4A1, POU2AF1, PRF1, PTPN6, PTPRC, RAC2, RHOH, RUNX3, S100A8, SELL, SELPLG, SIT1, SLA, STAT1, STAT4, TAP1, TNFRSF25, TNFRSF1B, TNFSF13B, TYROBP, VAV1, WAS, ZAP70, ZC3H12A                                                                                                                                                                                                                                                                                                                  |    |
| Hematological System Development and Function | quantity | quantity of blood cells              | 1,52E-45 | ADA, ALOX5, BCL2A1, BTK, BTLA, C3, C1QA, CCL2, CCL3, CCL5, CCL11, CCL19, CCL21, CCR2, CCR7, CD4, CD19, CD22, CD27, CD28, CD69, CD86, CD247, CD1D, CD3D, CD3E, CD3G, CD79A, CD8A, CIITA, CR2, CSF1R, CSF2RB, CSF3R, CTSS, CXCL2, CXCL10, CXCL13, CXCR3, CXCR6 (includes EG:10663), CYTIP, DEF6, FCER1G, HLA-DQA1, ICOS, IGHM, IGKC, IKZF1, IL10RA, IL12RB1, IL1B, IL27RA, IL2RB, IL2RG, IL7R, IRF1, IRF4, ITGB2, ITK, JAK3, LCK, LCP2, LSP1, LTB, MS4A1, MYB (includes EG:4602), POU2AF1, PRF1, PTPN6, PTPRC, RAC2, RHOH, RUNX3, S100A8, SELL, SELPLG, SIT1, SLA, STAT1, STAT4, TAP1, TNFRSF25, TNFRSF1B, TNFSF13B, TYROBP, VAV1, WAS, ZAP70, ZC3H12A | 89 |
| Hematological System Development and Function | quantity | quantity of lymphocytes              | 1,01E-42 | BCL2A1, BTK, BTLA, C3, CCL19, CCL21, CCR2, CCR7, CD4, CD19, CD22, CD27, CD28, CD69, CD86, CD247, CD1D, CD3D, CD3E, CD3G, CD79A, CIITA, CR2, CSF2RB, CTSS, CXCL10, CXCL13, CXCR3, CYTIP, DEF6, FCER1G, HLA-DQA1, ICOS, IGHM, IGKC, IKZF1, IL10RA, IL27RA, IL2RB, IL2RG, IL7R, IRF1, ITGB2, ITK, JAK3, LCK, LCP2, LSP1, LTB, MS4A1, POU2AF1, PRF1, PTPN6, PTPRC, RAC2, RHOH, RUNX3, SELL, SELPLG, SIT1, SLA, STAT1, STAT4, TAP1, TNFRSF25, TNFRSF1B, TNFSF13B, TYROBP, VAV1, WAS, ZAP70, ZC3H12A                                                                                                                                                       | 72 |
| Hematological System Development and Function | quantity | quantity of T lymphocytes            | 9,72E-27 | BCL2A1, BTLA, CCL19, CCL21, CCR2, CCR7, CD4, CD27, CD28, CD86, CD247, CD1D, CD3D, CD3E, CD3G, CIITA, CSF2RB, CTSS, CXCL10, CXCR3, DEF6, IKZF1, IL10RA, IL27RA, IL2RB, IL2RG, IL7R, IRF1, ITGB2, ITK, JAK3, LCK, LCP2, LTB, PTPRC, RHOH, RUNX3, SELPLG, SIT1, STAT1, TAP1, TNFRSF25, TNFRSF1B, TNFSF13B, VAV1, WAS, ZAP70                                                                                                                                                                                                                                                                                                                             | 47 |
| Hematological System Development and Function | quantity | quantity of B lymphocytes            | 4,98E-19 | BCL2A1, BTK, C3, CCR7, CD19, CD22, CD27, CD28, CD69, CD79A, CR2, CXCL13, FCER1G, HLA-DQA1, ICOS, IGHM, IGKC, IL2RG, IL7R, ITGB2, JAK3, MS4A1, POU2AF1, PTPN6, RAC2, SLA, TNFRSF1B, TNFSF13B, VAV1, WAS, ZC3H12A                                                                                                                                                                                                                                                                                                                                                                                                                                      | 31 |
| Hematological System Development and Function | quantity | quantity of antigen presenting cells | 1,10E-12 | ADA, CCL2, CCL3, CCL19, CCL21, CCR2, CCR7, CSF1R, CTSS, CXCL10, CXCL13, CXCR6 (includes EG:10663), IKZF1, IL12RB1, IL1B, IRF1, IRF4, ITGB2, LSP1, LTB, SELPLG, STAT4, TYROBP                                                                                                                                                                                                                                                                                                                                                                                                                                                                         | 23 |
| Hematological System Development and Function | quantity | quantity of plasma cells             | 8,00E-11 | CD22, ICOS, IL7R, ITGB2, PTPN6, RAC2, TNFRSF1B, TNFSF13B, ZC3H12A                                                                                                                                                                                                                                                                                                                                                                                                                                                                                                                                                                                    | 9  |
| Hematological System Development and Function | quantity | quantity of phagocytes               | 2,02E-10 | ADA, C1QA, CCL2, CCL3, CCR2, CD1D, CSF1R, CSF3R, CTSS, CXCL10, CXCR6 (includes EG:10663), IL12RB1, IL1B, ITGB2, JAK3, LSP1, RAC2, S100A8, SELL, SELPLG, STAT4, TNFRSF1B                                                                                                                                                                                                                                                                                                                                                                                                                                                                              | 22 |
| Hematological System Development and Function | quantity | quantity of natural killer cells     | 2,32E-09 | CD86, ICOS, IL2RB, IL2RG, IRF1, JAK3, LTB, PRF1, PTPRC, TNFRSF25, TYROBP                                                                                                                                                                                                                                                                                                                                                                                                                                                                                                                                                                             | 11 |
| Hematological System Development and Function | quantity | quantity of granulocytes             | 4,90E-09 | ADA, ALOX5, C1QA, CCL11, CD1D, CD8A, CSF2RB, CSF3R, IL1B, ITGB2, JAK3, RAC2, S100A8, SELL, SELPLG, STAT4, TNFRSF25, TNFRSF1B                                                                                                                                                                                                                                                                                                                                                                                                                                                                                                                         | 18 |
| Hematological                                 | quantity | quantity of myeloid                  | 6,29E-09 | ADA, ALOX5, C1QA, CCL11, CD1D, CD8A, CSF2RB, CSF3R, IKZF1, IL1B, ITGB2, JAK3, RAC2, S100A8, SELL, SELPLG, STAT4, TNFRSF25, TNFRSF1B                                                                                                                                                                                                                                                                                                                                                                                                                                                                                                                  | 19 |

|                                               |             |                                           |          |                                                                                                                                                                                                                                                                                                                                                                                                                                                                                                                                                                                                                                                                  |  |    |
|-----------------------------------------------|-------------|-------------------------------------------|----------|------------------------------------------------------------------------------------------------------------------------------------------------------------------------------------------------------------------------------------------------------------------------------------------------------------------------------------------------------------------------------------------------------------------------------------------------------------------------------------------------------------------------------------------------------------------------------------------------------------------------------------------------------------------|--|----|
| System Development and Function               |             | cells                                     |          |                                                                                                                                                                                                                                                                                                                                                                                                                                                                                                                                                                                                                                                                  |  |    |
| Hematological System Development and Function | quantity    | quantity of intraepithelial T lymphocytes | 3,14E-08 | IKZF1, IL2RG, IL7R, IRF1, PTPRC, TAP1                                                                                                                                                                                                                                                                                                                                                                                                                                                                                                                                                                                                                            |  | 6  |
| Hematological System Development and Function | quantity    | quantity of dendritic cells               | 4,93E-08 | CCL19, CCL21, CCR2, CCR7, CXCL13, IKZF1, IRF1, IRF4, ITGB2, LTB, TYROBP                                                                                                                                                                                                                                                                                                                                                                                                                                                                                                                                                                                          |  | 11 |
| Hematological System Development and Function | quantity    | quantity of natural killer T lymphocytes  | 6,58E-08 | CD1D, CD3E, CSF2RB, IKZF1, IL2RB, IL2RG, PTPRC, VAV1                                                                                                                                                                                                                                                                                                                                                                                                                                                                                                                                                                                                             |  | 8  |
| Hematological System Development and Function | development | development of mononuclear leukocytes     | 7,26E-47 | ADA, BCL11B, BCL2A1, BTK, CASP1, CCL3, CCL4, CCL5, CCL19, CCR5, CCR7, CD2, CD4, CD6, CD19, CD27, CD28, CD69, CD86, CD247, CD1D, CD3D, CD3E, CD3G, CD8A, CIITA, CLEC10A, CR2, CSF3R, CXCL11, DEF6, DOCK2, EOMES, FCER1G, GZMA, GZMB, HLA-DOA, HLA-DQA1, HLA-DQB1, ICOS, IDO1, IGHG1, IGHM, IKZF1, IL10RA, IL12RB1, IL1B, IL1RN, IL27RA, IL2RB, IL2RG, IL7R, IRF1, IRF4, ITGAL, ITGB2, ITK, JAK3, LAX1, LCK, LCP2, LTB, MAP4K1, MYB (includes EG:4602), NCAPH2, POU2AF1, PRF1, PSMB9, PTPN6, PTPN22, PTPRC, RAC2, RASSF5, RHOH, RUNX3, SH2D1A, SH2D2A, SIT1, SLAMF1, SPIB, STAT1, STAT4, TCL1A, TNFRSF25, TNFRSF1B, TNFSF13B, TRAT1, VAV1, WAS, XCL1, ZAP70        |  | 91 |
| Hematological System Development and Function | development | development of leukocytes                 | 8,10E-47 | ADA, BCL11B, BCL2A1, BTK, CASP1, CCL3, CCL4, CCL5, CCL19, CCR5, CCR7, CD2, CD4, CD6, CD19, CD27, CD28, CD69, CD86, CD247, CD1D, CD3D, CD3E, CD3G, CD8A, CIITA, CLEC10A, CR2, CSF1R, CSF3R, CXCL11, DEF6, DOCK2, EOMES, FCER1G, GZMA, GZMB, HLA-DOA, HLA-DQA1, HLA-DQB1, ICOS, IDO1, IGHG1, IGHM, IKZF1, IL10RA, IL12RB1, IL1B, IL1RN, IL27RA, IL2RB, IL2RG, IL7R, IRF1, IRF4, ITGAL, ITGB2, ITK, JAK3, LAX1, LCK, LCP2, LTB, MAP4K1, MYB (includes EG:4602), NCAPH2, POU2AF1, PRF1, PSMB9, PTPN6, PTPN22, PTPRC, RAC2, RASSF5, RHOH, RUNX3, SH2D1A, SH2D2A, SIT1, SLAMF1, SPIB, STAT1, STAT4, TCL1A, TNFRSF25, TNFRSF1B, TNFSF13B, TRAT1, VAV1, WAS, XCL1, ZAP70 |  | 92 |
| Hematological System Development and Function | development | development of lymphocytes                | 3,82E-46 | ADA, BCL11B, BCL2A1, BTK, CASP1, CCL3, CCL4, CCL5, CCL19, CCR5, CCR7, CD2, CD4, CD6, CD19, CD27, CD28, CD69, CD86, CD247, CD1D, CD3D, CD3E, CD3G, CD8A, CIITA, CLEC10A, CR2, CSF3R, DEF6, DOCK2, EOMES, FCER1G, GZMA, GZMB, HLA-DOA, HLA-DQA1, HLA-DQB1, ICOS, IDO1, IGHG1, IGHM, IKZF1, IL10RA, IL12RB1, IL1B, IL1RN, IL27RA, IL2RB, IL2RG, IL7R, IRF1, IRF4, ITGAL, ITGB2, ITK, JAK3, LAX1, LCK, LCP2, LTB, MAP4K1, MYB (includes EG:4602), NCAPH2, POU2AF1, PRF1, PSMB9, PTPN6, PTPN22, PTPRC, RAC2, RASSF5, RHOH, RUNX3, SH2D1A, SH2D2A, SIT1, SLAMF1, SPIB, STAT1, STAT4, TCL1A, TNFRSF25, TNFRSF1B, TNFSF13B, TRAT1, VAV1, WAS, XCL1, ZAP70                |  | 90 |
| Hematological System Development and Function | development | T cell development                        | 3,75E-43 | ADA, BCL11B, BCL2A1, CASP1, CCL3, CCL4, CCL5, CCL19, CCR5, CCR7, CD2, CD4, CD6, CD27, CD28, CD86, CD247, CD1D, CD3D, CD3E, CD3G, CD8A, CIITA, CLEC10A, DEF6, DOCK2, EOMES, FCER1G, GZMA, GZMB, HLA-DOA, HLA-DQA1, HLA-DQB1, ICOS, IDO1, IGHG1, IGHM, IKZF1, IL10RA, IL12RB1, IL1B, IL1RN, IL27RA, IL2RB, IL2RG, IL7R, IRF1, IRF4, ITGAL, ITGB2, ITK, JAK3, LAX1, LCK, LCP2, LTB, MAP4K1, MYB (includes EG:4602), NCAPH2, PRF1, PSMB9, PTPN6, PTPN22, PTPRC, RAC2, RASSF5, RHOH, RUNX3, SH2D1A, SH2D2A, SIT1, SLAMF1, SPIB, STAT1, STAT4, TCL1A, TNFRSF25, TNFRSF1B, TNFSF13B, TRAT1, VAV1, WAS, XCL1, ZAP70                                                      |  | 84 |
| Hematological System Development              | development | development of thymocytes                 | 3,15E-11 | CD3D, CD3E, CD3G, IL2RB, IL2RG, IL7R, IRF1, LAX1, LCP2, MYB (includes EG:4602), PTPRC, SIT1, SPIB, TRAT1, ZAP70                                                                                                                                                                                                                                                                                                                                                                                                                                                                                                                                                  |  | 15 |



|                                                                   |                       |                                     |          |                                                                                                                                                                                                                                                                                                                                                                                                                                                                                                                                                                                                                                                                                                                               |     |
|-------------------------------------------------------------------|-----------------------|-------------------------------------|----------|-------------------------------------------------------------------------------------------------------------------------------------------------------------------------------------------------------------------------------------------------------------------------------------------------------------------------------------------------------------------------------------------------------------------------------------------------------------------------------------------------------------------------------------------------------------------------------------------------------------------------------------------------------------------------------------------------------------------------------|-----|
| ent and Function<br>Hematological System Development and Function | development           | development of helper T lymphocytes | 1,08E-08 | CASP1, CD28, CD86, ICOS, IL12RB1, IL1B, IRF1, ITGB2, ITK, STAT1, STAT4                                                                                                                                                                                                                                                                                                                                                                                                                                                                                                                                                                                                                                                        | 11  |
| Hematological System Development and Function                     | development           | development of B lymphocytes        | 1,15E-07 | ADA, BTK, CD19, CD69, CR2, IGHM, IL2RG, IL7R, JAK3, MYB (includes EG:4602), POU2AF1, TNFSF13B, VAV1                                                                                                                                                                                                                                                                                                                                                                                                                                                                                                                                                                                                                           | 13  |
| Hematological System Development and Function                     | homeostasis           | T cell homeostasis                  | 7,23E-44 | ADA, BCL11B, BCL2A1, CASP1, CCL3, CCL4, CCL5, CCL19, CCR5, CCR7, CD2, CD4, CD6, CD27, CD28, CD86, CD247, CD1D, CD3D, CD3E, CD3G, CD8A, CIITA, CLEC10A, CORO1A, DEF6, DOCK2, EOMES, FCER1G, GZMA, GZMB, HLA-DOA, HLA-DQA1, HLA-DQB1, ICOS, IDO1, IGHG1, IGHM, IKZF1, IL10RA, IL12RB1, IL1B, IL1RN, IL27RA, IL2RB, IL2RG, IL7R, IRF1, IRF4, ITGAL, ITGB2, ITK, JAK3, LAX1, LCK, LCP2, LTB, MAP4K1, MYB (includes EG:4602), NCAPH2, PRF1, PSMB9, PTPN6, PTPN22, PTPRC, RAC2, RASSF5, RHOH, RUNX3, SH2D1A, SH2D2A, SIT1, SLAMF1, SPIB, STAT1, STAT4, TCL1A, TNFRSF25, TNFRSF1B, TNFSF13B, TRAT1, VAV1, WAS, XCL1, ZAP70                                                                                                           | 85  |
| Hematological System Development and Function                     | hematopoiesis         | hematopoiesis                       | 2,08E-43 | ADA, BCL11B, BCL2A1, BTK, CASP1, CCL3, CCL4, CCL5, CCL19, CCR2, CCR5, CCR7, CD2, CD4, CD6, CD14, CD19, CD27, CD28, CD69, CD86, CD247, CD1D, CD3D, CD3E, CD3G, CD79A, CD8A, CIITA, CLEC10A, CR2, CSF1R, CSF2RB, CSF3R, CXCL11, DEF6, DOCK2, EOMES, FCER1G, GZMA, GZMB, HLA-DOA, HLA-DQA1, HLA-DQB1, ICOS, IDO1, IGHG1, IGHM, IKZF1, IL10RA, IL12RB1, IL1B, IL1RN, IL27RA, IL2RB, IL2RG, IL7R, IRF1, IRF4, ITGAL, ITGB2, ITK, JAK3, LAX1, LCK, LCN2, LCP2, LTB, LTF, MAP4K1, MYB (includes EG:4602), NCAPH2, POU2AF1, PRF1, PSMB9, PTPN6, PTPN22, PTPRC, RAC2, RASSF5, RHOH, RUNX3, SH2D1A, SH2D2A, SIT1, SLAMF1, SPIB, STAT1, STAT4, TCL1A, TLR7, TNFRSF25, TNFRSF1B, TNFSF13B, TRAT1, VAV1, WAS, XCL1, ZAP70                  | 99  |
| Hematological System Development and Function                     | hematological process | hematological process               | 1,17E-40 | ADA, BCL11B, BCL2A1, BTK, C3, CASP1, CCL3, CCL4, CCL5, CCL11, CCL19, CCR2, CCR5, CCR7, CD2, CD4, CD6, CD14, CD19, CD27, CD28, CD69, CD86, CD247, CD1D, CD3D, CD3E, CD3G, CD79A, CD8A, CIITA, CLEC10A, CR2, CSF1R, CSF2RB, CSF3R, CXCL11, DEF6, DOCK2, EOMES, FCER1G, GZMA, GZMB, HLA-DOA, HLA-DQA1, HLA-DQB1, ICOS, IDO1, IGHG1, IGHM, IKZF1, IL10RA, IL12RB1, IL1B, IL1RN, IL27RA, IL2RB, IL2RG, IL7R, IRF1, IRF4, ITGAL, ITGB2, ITK, JAK3, LAX1, LCK, LCN2, LCP2, LTB, LTF, MAP4K1, MYB (includes EG:4602), NCAPH2, POU2AF1, PRF1, PSMB9, PTPN6, PTPN22, PTPRC, RAC2, RASSF5, RHOH, RUNX3, SH2D1A, SH2D2A, SIT1, SLAMF1, SPIB, STAT1, STAT4, TAC1, TCL1A, TLR7, TNFRSF25, TNFRSF1B, TNFSF13B, TRAT1, VAV1, WAS, XCL1, ZAP70 | 102 |
| Hematological System Development and Function                     | cell movement         | cell movement of leukocytes         | 2,18E-40 | C2, C3, CASP1, CCL2, CCL3, CCL4, CCL5, CCL11, CCL18, CCL19, CCL20, CCL21, CCR2, CCR5, CCR7, CD2, CD4, CD14, CD28, CD48, CD86, CORO1A, CSF1R, CSF3R, CTSS, CXCL1, CXCL2, CXCL6, CXCL9, CXCL10, CXCL11, CXCL13, CXCR3, CYSLTR1, DARC, FCER1G, FGB, FGR, FPR1, GNLY, HCK, ICAM2, IGHG1, IL16, IL12RB1, IL1B, IL1RN, IL27RA, IL2RB, ITGAL, ITGAX, ITGB2, ITK, LSP1, NCF1, PLA2G7, POU2AF1, PRF1, PRKCB, PTPN6, PTPRC, RAC2, RGS1, RUNX3, S100A8, SAA1, SELL, SELPLG, SERPINA3, SLPI, STAT1, TAC1, TIMP1, TNFRSF1B, UCP2, WAS, XCL1, ZC3H12A                                                                                                                                                                                       | 78  |
| Hematological System Development and Function                     | cell movement         | cell movement of myeloid cells      | 2,53E-29 | C2, C3, CASP1, CCL2, CCL3, CCL4, CCL5, CCL11, CCL21, CCR2, CD2, CD28, CD48, CORO1A, CSF3R, CXCL1, CXCL2, CXCL6, CXCL9, CXCL10, CXCR3, FCER1G, FGR, FPR1, HCK, ICAM2, IL1B, IL1RN, IL27RA, IL2RB, ITGAL, ITGAX, ITGB2, ITK, LSP1, NCF1, PLA2G7, PTPN6, PTPRC, RAC2, RUNX3, S100A8, SELL, SELPLG, SLPI, TAC1, TNFRSF1B, WAS, XCL1                                                                                                                                                                                                                                                                                                                                                                                               | 49  |
| Hematological System Development and Function                     | cell movement         | cell movement of granulocytes       | 2,19E-28 | C2, C3, CASP1, CCL2, CCL3, CCL4, CCL5, CCL11, CCL21, CCR2, CD2, CD28, CD48, CORO1A, CSF3R, CXCL1, CXCL2, CXCL6, CXCL9, CXCL10, CXCR3, FCER1G, FGR, FPR1, HCK, ICAM2, IL1B, IL1RN, IL27RA, IL2RB, ITGAL, ITGAX, ITGB2, ITK, LSP1, NCF1, PLA2G7, PTPN6, RAC2, RUNX3, S100A8, SELL, SELPLG, SLPI, TAC1, TNFRSF1B, WAS, XCL1                                                                                                                                                                                                                                                                                                                                                                                                      | 48  |
| Hematological System Development and Function                     | cell                  | cell                                | 1,57E-26 | C3, CCL2, CCL3, CCL4, CCL5, CCL11, CCL18, CCL19, CCL20, CCL21, CCR2,                                                                                                                                                                                                                                                                                                                                                                                                                                                                                                                                                                                                                                                          | 47  |

|                                               |               |                                           |          |                                                                                                                                                                                                                                                                                                      |    |
|-----------------------------------------------|---------------|-------------------------------------------|----------|------------------------------------------------------------------------------------------------------------------------------------------------------------------------------------------------------------------------------------------------------------------------------------------------------|----|
| Hematological System Development and Function | movement      | movement of mononuclear leukocytes        |          | CCR5, CCR7, CD28, CD86, CTSS, CXCL9, CXCL10, CXCL11, CXCL13, CXCR3, CYSLTR1, DARC, FPR1, GNLY, IGHG1, IL16, IL1B, ITGAL, ITGAX, ITGB2, ITK, POU2AF1, PRF1, PRKCB, RAC2, RGS1, SAA1, SELL, SELPLG, SERPINA3, TAC1, TIMP1, UCP2, WAS, XCL1, ZC3H12A                                                    |    |
| Hematological System Development and Function | cell movement | cell movement of lymphocytes              | 5,86E-25 | C3, CCL2, CCL3, CCL4, CCL5, CCL11, CCL18, CCL19, CCL20, CCL21, CCR2, CCR5, CCR7, CD28, CD86, CXCL9, CXCL10, CXCL11, CXCL13, CXCR3, CYSLTR1, DARC, GNLY, IGHG1, IL16, IL1B, ITGB2, ITK, POU2AF1, PRF1, RAC2, RGS1, SAA1, SELL, SELPLG, TAC1, TIMP1, UCP2, WAS, XCL1, ZC3H12A                          | 41 |
| Hematological System Development and Function | cell movement | cell movement of phagocytes               | 1,13E-24 | C2, C3, CASP1, CCL2, CCL3, CCL4, CCL5, CCL21, CCR2, CCR5, CD28, CORO1A, CSF1R, CSF3R, CXCL1, CXCL2, CXCL6, CXCL9, CXCL10, CXCR3, DARC, FCER1G, FGR, FPR1, HCK, IL16, IL12RB1, IL1B, IL1RN, ITGAL, ITGAX, ITGB2, LSP1, NCF1, PTPN6, RAC2, S100A8, SAA1, SELL, SELPLG, SLPI, TAC1, TNFRSF1B, WAS, XCL1 | 45 |
| Hematological System Development and Function | cell movement | cell movement of neutrophils              | 4,52E-22 | C2, C3, CASP1, CCL2, CCL3, CCL4, CCL5, CCL21, CCR2, CD28, CORO1A, CSF3R, CXCL1, CXCL2, CXCL6, CXCL10, FCER1G, FGR, FPR1, HCK, IL1B, IL1RN, ITGAL, ITGAX, ITGB2, LSP1, NCF1, PTPN6, RAC2, S100A8, SELL, SELPLG, SLPI, TAC1, TNFRSF1B, WAS, XCL1                                                       | 37 |
| Hematological System Development and Function | cell movement | cell movement of T lymphocytes            | 1,37E-18 | C3, CCL2, CCL3, CCL4, CCL5, CCL11, CCL18, CCL19, CCL20, CCL21, CCR2, CCR5, CCR7, CD28, CD86, CXCL9, CXCL10, CXCL11, CYSLTR1, DARC, GNLY, IL16, IL1B, ITGB2, ITK, PRF1, SELL, SELPLG, XCL1                                                                                                            | 29 |
| Hematological System Development and Function | cell movement | cell movement of antigen presenting cells | 2,47E-18 | C3, CCL2, CCL3, CCL4, CCL5, CCL11, CCL19, CCL20, CCL21, CCR2, CCR5, CCR7, CD86, CSF1R, CXCL9, CXCL10, CXCR3, DARC, FPR1, GNLY, ICAM2, IL16, IL12RB1, IL1B, IL1RN, ITGB2, RAC2, SAA1, SELL, TAC1                                                                                                      | 30 |
| Hematological System Development and Function | cell movement | cell movement of eosinophils              | 3,31E-17 | C3, CCL2, CCL3, CCL5, CCL11, CCL21, CD2, CD48, CXCL9, CXCL10, CXCR3, FPR1, ICAM2, IL1B, IL27RA, IL2RB, ITGAL, ITGB2, ITK, PLA2G7, RUNX3, WAS                                                                                                                                                         | 22 |
| Hematological System Development and Function | cell movement | cell movement of dendritic cells          | 1,41E-12 | CCL2, CCL3, CCL4, CCL5, CCL11, CCL19, CCL20, CCL21, CCR7, CD86, FPR1, GNLY, ICAM2, IL16, IL1B, TAC1                                                                                                                                                                                                  | 16 |
| Hematological System Development and Function | cell movement | cell movement of memory T lymphocytes     | 1,68E-12 | CCL2, CCL5, CCL19, CCL21, CCR7, CD28, CXCL9, CXCL11, GNLY, ITGB2                                                                                                                                                                                                                                     | 10 |
| Hematological System Development and Function | cell movement | cell movement of macrophages              | 1,01E-11 | C3, CCL2, CCL3, CCL4, CCL5, CCR2, CCR5, CSF1R, CXCL9, CXCL10, CXCR3, DARC, IL16, IL12RB1, IL1B, IL1RN, ITGB2, RAC2, SAA1, SELL                                                                                                                                                                       | 20 |
| Hematological System Development and Function | cell movement | cell movement of B lymphocytes            | 1,39E-10 | CCL18, CCL19, CCL20, CCL21, CCR2, CXCL9, CXCL13, POU2AF1, RAC2, RGS1, SELPLG, ZC3H12A                                                                                                                                                                                                                | 12 |

|                                               |               |                                       |          |                                                                                                                                                                                                                                                                                             |    |
|-----------------------------------------------|---------------|---------------------------------------|----------|---------------------------------------------------------------------------------------------------------------------------------------------------------------------------------------------------------------------------------------------------------------------------------------------|----|
| Hematological System Development and Function | cell movement | cell movement of mononuclear cells    | 2,62E-10 | CCL2, CCL3, CCL4, CCL20, CCR2, CCR5, CIITA, ICOS, JAK3, LTB, TCIRG1                                                                                                                                                                                                                         | 11 |
| Hematological System Development and Function | cell movement | cell movement of monocytes            | 1,72E-09 | CCL2, CCL3, CCL4, CCL5, CCL11, CCR2, CTSS, CXCL9, CXCL10, FPR1, GNLY, IL1B, ITGAL, ITGAX, ITGB2, PRKCB, SERPINA3                                                                                                                                                                            | 17 |
| Hematological System Development and Function | cell movement | cell movement of naive lymphocytes    | 1,28E-08 | CCL18, CCL19, CCL20, CCL21, CCR7, SELL                                                                                                                                                                                                                                                      | 6  |
| Hematological System Development and Function | cell movement | cell movement of leukocyte cell lines | 1,46E-08 | C3, CCL3, CCL5, CCL19, CCL21, CCR7, CXCL11, CXCL13, CXCR3, ITGB2, RGS1, WAS                                                                                                                                                                                                                 | 12 |
| Hematological System Development and Function | binding       | binding of leukocytes                 | 3,85E-34 | C3, CCL2, CCL3, CCL4, CCL5, CCL11, CCL19, CCL20, CCL21, CCR5, CD2, CD4, CD6, CD14, CD48, CD69, CD86, CD3E, CLEC10A, CXCL2, CXCL9, CXCL10, CXCL11, CXCL13, CXCR3, FCGR3B, FGR, FPR1, FYB, HCK, ICOS, ITGAL, ITGAX, ITGB2, ITK, KLRK1, LCK, LCP2, LSP1, LTF, PTPN6, PTPRC, SELL, SELPLG, TAC1 | 45 |
| Hematological System Development and Function | binding       | binding of mononuclear leukocytes     | 1,82E-27 | CCL2, CCL3, CCL4, CCL5, CCL11, CCL19, CCL20, CCL21, CCR5, CD2, CD4, CD6, CD69, CD86, CD3E, CLEC10A, CXCL9, CXCL10, CXCL11, CXCL13, CXCR3, FYB, ICOS, ITGAL, ITGB2, ITK, KLRK1, LCK, LCP2, SELL, SELPLG, TAC1                                                                                | 32 |
| Hematological System Development and Function | binding       | binding of lymphocytes                | 1,78E-23 | CCL4, CCL5, CCL19, CCL20, CCL21, CD2, CD6, CD69, CD86, CD3E, CLEC10A, CXCL9, CXCL10, CXCL11, CXCL13, CXCR3, FYB, ICOS, ITGAL, ITGB2, ITK, KLRK1, LCK, LCP2, SELL, SELPLG, TAC1                                                                                                              | 27 |
| Hematological System Development and Function | binding       | binding of T lymphocytes              | 3,71E-20 | CCL4, CCL5, CCL21, CD2, CD6, CD69, CD86, CLEC10A, CXCL9, CXCL10, CXCL11, CXCR3, FYB, ICOS, ITGAL, ITGB2, ITK, KLRK1, LCK, LCP2, SELPLG, TAC1                                                                                                                                                | 22 |
| Hematological System Development and Function | binding       | binding of phagocytes                 | 6,86E-14 | C3, CD2, CD14, CD69, CLEC10A, CXCL2, CXCL10, FCGR3B, FGR, FPR1, HCK, ITGAL, ITGB2, LSP1, PTPN6, PTPRC, SELL, SELPLG                                                                                                                                                                         | 18 |
| Hematological System Development and Function | binding       | binding of granulocytes               | 1,69E-11 | C3, CCL5, CCL11, CXCL2, CXCL10, FCGR3B, FGR, HCK, ITGB2, LSP1, LTF, PTPN6, SELL, SELPLG                                                                                                                                                                                                     | 14 |
| Hematological System Development and Function | binding       | binding of neutrophils                | 7,08E-10 | C3, CXCL2, CXCL10, FCGR3B, FGR, HCK, ITGB2, LSP1, PTPN6, SELL, SELPLG                                                                                                                                                                                                                       | 11 |

|                                               |                 |                                           |          |                                                                                                                                                                                                                                                                                                                                                                                                                                                                                                                                 |    |
|-----------------------------------------------|-----------------|-------------------------------------------|----------|---------------------------------------------------------------------------------------------------------------------------------------------------------------------------------------------------------------------------------------------------------------------------------------------------------------------------------------------------------------------------------------------------------------------------------------------------------------------------------------------------------------------------------|----|
| Function                                      |                 |                                           |          |                                                                                                                                                                                                                                                                                                                                                                                                                                                                                                                                 |    |
| Hematological System Development and Function | binding         | binding of antigen presenting cells       | 1,71E-08 | CD2, CD4, CD6, CD14, CD69, CLEC10A, FPR1, FYB, ITGAL, LCK, PTPRC                                                                                                                                                                                                                                                                                                                                                                                                                                                                | 11 |
| Hematological System Development and Function | differentiation | differentiation of leukocytes             | 2,83E-33 | ADA, BCL2A1, CCL2, CCL3, CCL11, CCL19, CD2, CD4, CD14, CD27, CD28, CD86, CD1D, CD300A, CD3D, CD3E, CD79A, CD8A, CR2, CSF1R, CSF2RB, CSF3R, DEF6, DOCK2, HLA-DOA, HLA-DQA1, ICOS, IGHG1, IGHM, IKZF1, IL12RB1, IL1B, IL1RN, IL27RA, IL2RB, IL2RG, IL7R, IRF1, IRF4, IRF7, ITGAL, ITGB2, ITK, JAK3, LCK, LCP2, MYB (includes EG:4602), NCAPH2, POU2AF1, PTPN6, PTPN22, PTPRC, RASSF5, RGS10, RHOH, SH2D1A, SIT1, SLAMF1, SPIB, STAT1, STAT4, TIMP1, TLR7, TNFRSF25, TNFSF13B, TRAT1, VAV1, WAS, ZAP70                             | 69 |
| Hematological System Development and Function | differentiation | differentiation of mononuclear leukocytes | 4,25E-33 | ADA, BCL2A1, CCL2, CCL3, CCL19, CD2, CD4, CD14, CD27, CD28, CD86, CD1D, CD3D, CD3E, CD79A, CD8A, CR2, CSF1R, DEF6, DOCK2, HLA-DOA, HLA-DQA1, ICOS, IGHG1, IGHM, IKZF1, IL12RB1, IL1B, IL1RN, IL27RA, IL2RB, IL2RG, IL7R, IRF1, IRF4, IRF7, ITGAL, ITGB2, ITK, JAK3, LCK, LCP2, MYB (includes EG:4602), NCAPH2, POU2AF1, PTPN6, PTPN22, PTPRC, RASSF5, RHOH, SH2D1A, SIT1, SLAMF1, SPIB, STAT1, STAT4, TLR7, TNFRSF25, TNFSF13B, TRAT1, VAV1, WAS, ZAP70                                                                         | 63 |
| Hematological System Development and Function | differentiation | differentiation of blood cells            | 1,05E-32 | ADA, BCL2A1, CCL2, CCL3, CCL11, CCL19, CD2, CD4, CD14, CD27, CD28, CD86, CD1D, CD300A, CD3D, CD3E, CD79A, CD8A, CR2, CSF1R, CSF2RB, CSF3R, DEF6, DOCK2, HCLS1, HLA-DOA, HLA-DQA1, ICAM2, ICOS, IGHG1, IGHM, IKZF1, IL12RB1, IL1B, IL1RN, IL27RA, IL2RB, IL2RG, IL7R, IRF1, IRF4, IRF7, ITGAL, ITGB2, ITK, JAK3, LCK, LCN2, LCP2, MAP4K1, MYB (includes EG:4602), NCAPH2, POU2AF1, PTPN6, PTPN22, PTPRC, RASSF5, RGS10, RHOH, SH2D1A, SIT1, SLAMF1, SPIB, STAT1, STAT4, TIMP1, TLR7, TNFRSF25, TNFSF13B, TRAT1, VAV1, WAS, ZAP70 | 73 |
| Hematological System Development and Function | differentiation | differentiation of lymphocytes            | 1,58E-32 | ADA, BCL2A1, CCL3, CCL19, CD2, CD4, CD14, CD27, CD28, CD86, CD1D, CD3D, CD3E, CD79A, CD8A, CR2, DEF6, DOCK2, HLA-DOA, HLA-DQA1, ICOS, IGHG1, IGHM, IKZF1, IL12RB1, IL1B, IL1RN, IL27RA, IL2RB, IL2RG, IL7R, IRF1, IRF4, ITGAL, ITGB2, ITK, JAK3, LCK, LCP2, MYB (includes EG:4602), NCAPH2, POU2AF1, PTPN6, PTPN22, PTPRC, RASSF5, RHOH, SH2D1A, SIT1, SLAMF1, SPIB, STAT1, STAT4, TLR7, TNFRSF25, TNFSF13B, TRAT1, VAV1, WAS, ZAP70                                                                                            | 60 |
| Hematological System Development and Function | differentiation | differentiation of T lymphocytes          | 3,22E-24 | ADA, BCL2A1, CCL3, CCL19, CD2, CD4, CD28, CD86, CD1D, CD3E, CD8A, DEF6, HLA-DOA, HLA-DQA1, ICOS, IGHG1, IKZF1, IL12RB1, IL1B, IL1RN, IL27RA, IL2RB, IL2RG, IL7R, IRF1, IRF4, ITGAL, ITGB2, ITK, JAK3, LCK, LCP2, MYB (includes EG:4602), NCAPH2, PTPN22, PTPRC, RASSF5, SH2D1A, SLAMF1, STAT1, STAT4, TNFSF13B, VAV1, WAS, ZAP70                                                                                                                                                                                                | 45 |
| Hematological System Development and Function | differentiation | differentiation of helper T lymphocytes   | 9,77E-11 | CCL3, CD28, CD86, ICOS, IGHG1, IL12RB1, IL1B, IL27RA, IL2RB, IRF1, ITGAL, ITGB2, ITK, JAK3, SH2D1A, STAT1, STAT4, TNFSF13B, VAV1                                                                                                                                                                                                                                                                                                                                                                                                | 19 |
| Hematological System Development and Function | differentiation | differentiation of B lymphocytes          | 2,03E-08 | CD14, CD27, CD79A, CR2, ICOS, IGHM, IKZF1, IL2RB, IL2RG, IL7R, IRF4, POU2AF1, PTPN6, PTPRC, SPIB, TLR7, TNFSF13B                                                                                                                                                                                                                                                                                                                                                                                                                | 17 |
| Hematological System Development and Function | differentiation | differentiation of Th2 cells              | 6,00E-08 | CD28, CD86, ICOS, IGHG1, IRF1, ITK, JAK3, SH2D1A, STAT1, STAT4, VAV1                                                                                                                                                                                                                                                                                                                                                                                                                                                            | 11 |
| Hematological System Development and Function | differentiation | differentiation of thymocytes             | 6,97E-08 | CD2, CD28, CD86, CD3E, IKZF1, IL2RG, LCP2, MYB (includes EG:4602), WAS, ZAP70                                                                                                                                                                                                                                                                                                                                                                                                                                                   | 10 |

| Function                                      |            |                                  |          |                                                                                                                                                                                                                                                                                                                                               |    |
|-----------------------------------------------|------------|----------------------------------|----------|-----------------------------------------------------------------------------------------------------------------------------------------------------------------------------------------------------------------------------------------------------------------------------------------------------------------------------------------------|----|
| Hematological System Development and Function | homing     | homing of leukocytes             | 2,34E-29 | C3, CCL2, CCL3, CCL4, CCL5, CCL11, CCL18, CCL19, CCL20, CCL21, CCR2, CCR5, CCR7, CD4, CD28, CORO1A, CSF3R, CXCL1, CXCL2, CXCL6, CXCL9, CXCL10, CXCL11, CXCL13, CXCR3, CYSLTR1, FCER1G, FGR, FPR1, GNLY, HCK, IGHG1, IL16, IL12RB1, IL1B, ITGAL, ITGB2, LSP1, PRKCB, PTPN6, PTPRC, RAC2, RGS1, S100A8, SAA1, SELPLG, SERPINA3, TAC1, WAS, XCL1 | 50 |
| Hematological System Development and Function | homing     | homing of mononuclear leukocytes | 9,53E-21 | CCL2, CCL3, CCL4, CCL5, CCL11, CCL18, CCL19, CCL20, CCL21, CCR2, CCR5, CCR7, CXCL9, CXCL10, CXCL11, CXCL13, CXCR3, CYSLTR1, FPR1, GNLY, IGHG1, IL16, IL1B, ITGAL, PRKCB, RAC2, RGS1, SAA1, SELPLG, SERPINA3, TAC1, WAS, XCL1                                                                                                                  | 33 |
| Hematological System Development and Function | homing     | homing of myeloid cells          | 7,97E-20 | C3, CCL2, CCL3, CCL4, CCL5, CCL11, CD28, CORO1A, CSF3R, CXCL1, CXCL2, CXCL6, CXCL9, CXCL10, CXCR3, FCER1G, FGR, FPR1, HCK, IL1B, ITGB2, LSP1, PTPN6, PTPRC, RAC2, S100A8, TAC1, WAS, XCL1                                                                                                                                                     | 29 |
| Hematological System Development and Function | homing     | homing of lymphocytes            | 1,37E-19 | CCL2, CCL3, CCL4, CCL5, CCL11, CCL18, CCL19, CCL20, CCL21, CCR2, CCR5, CCR7, CXCL9, CXCL10, CXCL11, CXCL13, CXCR3, CYSLTR1, GNLY, IGHG1, IL16, RAC2, RGS1, SAA1, SELPLG, TAC1, WAS, XCL1                                                                                                                                                      | 28 |
| Hematological System Development and Function | homing     | homing of phagocytes             | 4,11E-19 | CCL2, CCL3, CCL4, CCL5, CD28, CORO1A, CSF3R, CXCL1, CXCL2, CXCL6, CXCL9, CXCL10, CXCR3, FCER1G, FGR, FPR1, HCK, IL12RB1, IL1B, ITGB2, LSP1, PTPN6, RAC2, S100A8, SAA1, TAC1, WAS, XCL1                                                                                                                                                        | 28 |
| Hematological System Development and Function | homing     | homing of granulocytes           | 7,75E-19 | C3, CCL2, CCL3, CCL4, CCL5, CCL11, CD28, CORO1A, CSF3R, CXCL1, CXCL2, CXCL6, CXCL9, CXCL10, CXCR3, FCER1G, FGR, FPR1, HCK, IL1B, ITGB2, LSP1, PTPN6, RAC2, S100A8, TAC1, WAS, XCL1                                                                                                                                                            | 28 |
| Hematological System Development and Function | homing     | homing of neutrophils            | 1,56E-17 | CCL2, CCL3, CCL4, CCL5, CD28, CORO1A, CSF3R, CXCL1, CXCL2, CXCL6, CXCL10, FCER1G, FGR, FPR1, HCK, IL1B, ITGB2, LSP1, PTPN6, RAC2, S100A8, TAC1, WAS, XCL1                                                                                                                                                                                     | 24 |
| Hematological System Development and Function | homing     | homing of T lymphocytes          | 9,00E-13 | CCL2, CCL3, CCL4, CCL5, CCL11, CCL18, CCL19, CCL20, CCL21, CCR5, CCR7, CXCL9, CXCL10, CXCL11, CYSLTR1, GNLY, IL16, SELPLG                                                                                                                                                                                                                     | 18 |
| Hematological System Development and Function | homing     | homing of eosinophils            | 2,60E-09 | C3, CCL2, CCL3, CCL5, CCL11, CXCL9, CXCL10, CXCR3, FPR1, WAS                                                                                                                                                                                                                                                                                  | 10 |
| Hematological System Development and Function | homing     | homing of memory T lymphocytes   | 1,11E-08 | CCL2, CCL5, CCL19, CCL21, CCR7, CXCL9, GNLY                                                                                                                                                                                                                                                                                                   | 7  |
| Hematological System Development              | chemotaxis | chemotaxis of leukocytes         | 3,08E-27 | C3, CCL2, CCL3, CCL4, CCL5, CCL11, CCL18, CCL19, CCL20, CCL21, CCR2, CCR5, CCR7, CD4, CD28, CORO1A, CSF3R, CXCL1, CXCL2, CXCL6, CXCL9, CXCL10, CXCL11, CXCL13, CXCR3, CYSLTR1, FCER1G, FGR, FPR1, GNLY, HCK, IL16, IL12RB1, IL1B, ITGAL, ITGB2, LSP1, PRKCB, PTPN6, PTPRC, RAC2, RGS1,                                                        | 47 |

|                                               |            |                                        |          |                                                                                                                                                                                                          |    |
|-----------------------------------------------|------------|----------------------------------------|----------|----------------------------------------------------------------------------------------------------------------------------------------------------------------------------------------------------------|----|
| ent and Function                              |            |                                        |          | S100A8, SAA1, SERPINA3, TAC1, XCL1                                                                                                                                                                       |    |
| Hematological System Development and Function | chemotaxis | chemotaxis of myeloid cells            | 7,75E-19 | C3, CCL2, CCL3, CCL4, CCL5, CCL11, CD28, CORO1A, CSF3R, CXCL1, CXCL2, CXCL6, CXCL9, CXCL10, CXCR3, FCER1G, FGR, FPR1, HCK, IL1B, ITGB2, LSP1, PTPN6, PTPRC, RAC2, S100A8, TAC1, XCL1                     | 28 |
| Hematological System Development and Function | chemotaxis | chemotaxis of mononuclear leukocytes   | 8,38E-19 | CCL2, CCL3, CCL4, CCL5, CCL11, CCL18, CCL19, CCL20, CCL21, CCR2, CCR5, CCR7, CXCL9, CXCL10, CXCL11, CXCL13, CXCR3, CYSLTR1, FPR1, GNLY, IL16, IL1B, ITGAL, PRKCB, RAC2, RGS1, SAA1, SERPINA3, TAC1, XCL1 | 30 |
| Hematological System Development and Function | chemotaxis | chemotaxis of phagocytes               | 3,97E-18 | CCL2, CCL3, CCL4, CCL5, CD28, CORO1A, CSF3R, CXCL1, CXCL2, CXCL6, CXCL9, CXCL10, CXCR3, FCER1G, FGR, FPR1, HCK, IL12RB1, IL1B, ITGB2, LSP1, PTPN6, RAC2, S100A8, SAA1, TAC1, XCL1                        | 27 |
| Hematological System Development and Function | chemotaxis | chemotaxis of granulocytes             | 7,31E-18 | C3, CCL2, CCL3, CCL4, CCL5, CCL11, CD28, CORO1A, CSF3R, CXCL1, CXCL2, CXCL6, CXCL9, CXCL10, CXCR3, FCER1G, FGR, FPR1, HCK, IL1B, ITGB2, LSP1, PTPN6, RAC2, S100A8, TAC1, XCL1                            | 27 |
| Hematological System Development and Function | chemotaxis | chemotaxis of lymphocytes              | 9,70E-18 | CCL2, CCL3, CCL4, CCL5, CCL11, CCL18, CCL19, CCL20, CCL21, CCR2, CCR5, CCR7, CXCL9, CXCL10, CXCL11, CXCL13, CXCR3, CYSLTR1, GNLY, IL16, RAC2, RGS1, SAA1, TAC1, XCL1                                     | 25 |
| Hematological System Development and Function | chemotaxis | chemotaxis of neutrophils              | 1,64E-16 | CCL2, CCL3, CCL4, CCL5, CD28, CORO1A, CSF3R, CXCL1, CXCL2, CXCL6, CXCL10, FCER1G, FGR, FPR1, HCK, IL1B, ITGB2, LSP1, PTPN6, RAC2, S100A8, TAC1, XCL1                                                     | 23 |
| Hematological System Development and Function | chemotaxis | chemotaxis of antigen presenting cells | 2,54E-12 | CCL2, CCL3, CCL4, CCL5, CCL11, CCL19, CCL20, CCL21, CCR7, CXCL9, CXCR3, FPR1, GNLY, IL16, IL12RB1, IL1B, SAA1, TAC1                                                                                      | 18 |
| Hematological System Development and Function | chemotaxis | chemotaxis of dendritic cells          | 2,22E-11 | CCL2, CCL3, CCL4, CCL5, CCL11, CCL19, CCL20, CCL21, CCR7, FPR1, GNLY, IL16, IL1B, TAC1                                                                                                                   | 14 |
| Hematological System Development and Function | chemotaxis | chemotaxis of T lymphocytes            | 2,84E-11 | CCL2, CCL3, CCL4, CCL5, CCL11, CCL18, CCL19, CCL20, CCL21, CCR5, CXCL9, CXCL10, CXCL11, CYSLTR1, GNLY, IL16                                                                                              | 16 |
| Hematological System Development and Function | chemotaxis | chemotaxis of monocytes                | 2,68E-09 | CCL2, CCL3, CCL4, CCL5, CCL11, CCR2, CXCL9, CXCL10, FPR1, GNLY, IL1B, ITGAL, PRKCB, SERPINA3                                                                                                             | 14 |
| Hematological System                          | chemotaxis | chemotaxis of B lymphocytes            | 2,91E-09 | CCL18, CCL19, CCL20, CCL21, CCR2, CXCL9, CXCL13, RAC2, RGS1                                                                                                                                              | 9  |

|                                               |             |                                         |          |                                                                                                                                                                                                                                               |    |
|-----------------------------------------------|-------------|-----------------------------------------|----------|-----------------------------------------------------------------------------------------------------------------------------------------------------------------------------------------------------------------------------------------------|----|
| Development and Function Hematological System | chemotaxis  | chemotaxis of leukocyte cell lines      | 1,08E-08 | C3, CCL3, CCL5, CCL19, CCL21, CCR7, CXCL11, CXCL13, CXCR3, RGS1, WAS                                                                                                                                                                          | 11 |
| Development and Function Hematological System | chemotaxis  | chemotaxis of eosinophils               | 3,45E-08 | C3, CCL2, CCL3, CCL5, CCL11, CXCL9, CXCL10, CXCR3, FPR1                                                                                                                                                                                       | 9  |
| Development and Function Hematological System | recruitment | recruitment of leukocytes               | 6,53E-26 | BTLA, C3, C3AR1, CCL2, CCL3, CCL4, CCL5, CCL11, CCL19, CCL20, CCL21, CCR2, CCR5, CCR7, CD4, CD14, CD19, CD28, CD8A, CR2, CXCL1, CXCL2, CXCL9, CXCL10, CXCR3, DARC, IGHG1, IL1B, IL1RN, ITGB2, LSP1, LYZ, SELL, SELPLG, SLPI, TAC1, TLR7, UCP2 | 38 |
| Development and Function Hematological System | recruitment | recruitment of granulocytes             | 2,47E-20 | BTLA, C3, C3AR1, CCL2, CCL3, CCL4, CCL5, CCL11, CCL19, CCL20, CCR2, CD14, CD19, CD28, CD8A, CR2, CXCL1, CXCL2, CXCL9, CXCL10, DARC, IGHG1, IL1B, IL1RN, LSP1, LYZ, SLPI                                                                       | 27 |
| Development and Function Hematological System | recruitment | recruitment of phagocytes               | 7,71E-18 | C3AR1, CCL2, CCL3, CCL4, CCL5, CCL19, CCL20, CCR2, CCR5, CD14, CD19, CD28, CD8A, CR2, CXCL1, CXCL2, CXCL10, DARC, IL1B, IL1RN, ITGB2, LSP1, LYZ, SLPI, UCP2                                                                                   | 25 |
| Development and Function Hematological System | recruitment | recruitment of neutrophils              | 4,34E-17 | C3AR1, CCL2, CCL3, CCL4, CCL5, CCL19, CCL20, CCR2, CD14, CD19, CD28, CD8A, CR2, CXCL1, CXCL2, CXCL10, DARC, IL1B, IL1RN, LSP1, LYZ, SLPI                                                                                                      | 22 |
| Development and Function Hematological System | recruitment | recruitment of lymphocytes              | 5,29E-14 | CCL2, CCL3, CCL4, CCL5, CCL11, CCL19, CCL20, CCL21, CCR2, CCR7, CD4, CD8A, CXCL9, CXCL10, CXCR3, IL1B, SELL                                                                                                                                   | 17 |
| Development and Function Hematological System | recruitment | recruitment of T lymphocytes            | 1,48E-12 | CCL2, CCL3, CCL4, CCL5, CCL11, CCL19, CCL20, CCL21, CCR2, CCR7, CD4, CD8A, CXCL9, CXCL10                                                                                                                                                      | 14 |
| Development and Function Hematological System | recruitment | recruitment of antigen presenting cells | 3,76E-11 | C3AR1, CCL2, CCL3, CCL4, CCL5, CCL19, CCL20, CCR2, CCR5, CD8A, CXCL10, ITGB2, LSP1, UCP2                                                                                                                                                      | 14 |
| Development and Function Hematological System | recruitment | recruitment of dendritic cells          | 4,81E-10 | CCL2, CCL3, CCL4, CCL5, CCL19, CCL20, CCR2, CXCL10                                                                                                                                                                                            | 8  |
| Development and Function Hematological System | recruitment | recruitment of                          | 6,40E-09 | CCL2, CCL3, CCL4, CCL5, CCL19, CCL20, CCR2, CXCL10, IL1B                                                                                                                                                                                      | 9  |





|                                               |                |                                          |          |                                                                                                                                                                                                                                                                    |    |
|-----------------------------------------------|----------------|------------------------------------------|----------|--------------------------------------------------------------------------------------------------------------------------------------------------------------------------------------------------------------------------------------------------------------------|----|
| gical System Development and Function         | tion           | n of mononuclear leukocytes              |          | ICOS, IL10RA, IL2RG, ITGAL, ITGB2, PTGDS, RUNX3, SELL, SH2D2A, TNFRSF25                                                                                                                                                                                            |    |
| Hematological System Development and Function | accumulation   | accumulation of lymphocytes              | 3,50E-15 | CCL5, CCL21, CCR5, CCR7, CD28, CD86, CD1D, CXCL10, CXCR3, DEF6, ICOS, IL10RA, IL2RG, ITGAL, ITGB2, RUNX3, SELL, SH2D2A, TNFRSF25                                                                                                                                   | 19 |
| Hematological System Development and Function | accumulation   | accumulation of T lymphocytes            | 5,82E-14 | CCL5, CCL21, CCR5, CCR7, CD28, CD86, CXCL10, CXCR3, DEF6, ICOS, IL10RA, IL2RG, ITGAL, RUNX3, SH2D2A, TNFRSF25                                                                                                                                                      | 16 |
| Hematological System Development and Function | accumulation   | accumulation of phagocytes               | 6,34E-11 | CCL2, CCL5, CCL11, CCR2, CD28, CXCL2, CXCL10, GRN, IL1B, IL1RN, ITGAX, ITGB2, S100A8, SELPLG, SLPI, TIMP1                                                                                                                                                          | 16 |
| Hematological System Development and Function | accumulation   | accumulation of granulocytes             | 2,59E-10 | ALOX5, CCL2, CCL5, CCL11, CXCL2, CXCL9, CXCL10, GRN, IL1B, IL1RN, ITGB2, PTGDS, S100A8, SELPLG, SLPI                                                                                                                                                               | 15 |
| Hematological System Development and Function | cell death     | cell death of T lymphocytes              | 7,64E-22 | ADA, BCL2A1, CASP1, CCL3, CCL4, CCL5, CCL19, CCR5, CD2, CD4, CD27, CD28, CD247, CD3E, CIITA, CLEC10A, DEF6, EOMES, GZMA, GZMB, ICOS, IDO1, IGHM, IL1B, IL2RG, IL7R, ITK, JAK3, LCK, MAP4K1, PRF1, PTPRC, RAC2, SH2D2A, STAT1, TCL1A, TNFRSF25, TNFRSF1B, WAS, XCL1 | 40 |
| Hematological System Development and Function | apoptosis      | apoptosis of T lymphocytes               | 1,06E-17 | ADA, BCL2A1, CASP1, CCL3, CCL4, CCL5, CCR5, CD2, CD4, CD27, CD28, CD247, CD3E, CIITA, GZMA, GZMB, ICOS, IL1B, IL2RG, IL7R, ITK, JAK3, LCK, MAP4K1, PRF1, PTPRC, RAC2, STAT1, TCL1A, TNFRSF25, TNFRSF1B, WAS, XCL1                                                  | 33 |
| Hematological System Development and Function | growth         | growth of lymphocytes                    | 1,61E-17 | BTK, C3, CD2, CD4, CD14, CD22, CD27, CD28, CD86, CD3E, CR2, ICOS, IGHM, IL1B, IL2RB, IL7R, IRF1, JAK3, LCP2, PRF1, PTPN6, SLAMF1, STAT4, TCL1A, TNFRSF1B, TNFSF13B, ZAP70                                                                                          | 27 |
| Hematological System Development and Function | growth         | growth of T lymphocytes                  | 4,47E-14 | C3, CD2, CD4, CD27, CD28, CD86, CD3E, ICOS, IGHM, IL1B, IRF1, JAK3, LCP2, PRF1, PTPN6, SLAMF1, STAT4, TCL1A, TNFRSF1B, TNFSF13B, ZAP70                                                                                                                             | 21 |
| Hematological System Development and Function | transmigration | transmigration of leukocytes             | 1,58E-16 | CCL2, CCL3, CCL4, CCL5, CCL11, CCL19, CCR7, CD28, CD86, CTSS, CXCL2, CXCL9, CXCL10, CXCL11, FPR1, ICAM2, IL1B, ITGAL, ITGAX, ITGB2, LSP1, SLPI                                                                                                                     | 22 |
| Hematological System Development and Function | transmigration | transmigration of mononuclear leukocytes | 7,71E-10 | CCL2, CCL3, CCL4, CCL5, CCR7, CD28, CD86, CTSS, CXCL11, ITGAL, ITGAX, ITGB2                                                                                                                                                                                        | 12 |

|                                               |                 |                                             |          |                                                                                                                                                   |    |
|-----------------------------------------------|-----------------|---------------------------------------------|----------|---------------------------------------------------------------------------------------------------------------------------------------------------|----|
| Hematological System Development and Function | transmigration  | transmigration of granulocytes              | 2,32E-09 | CCL11, CXCL2, CXCL9, CXCL10, FPR1, ICAM2, ITGAL, ITGAX, ITGB2, LSP1, SLPI                                                                         | 11 |
| Hematological System Development and Function | transmigration  | transmigration of dendritic cells           | 1,11E-08 | CCL3, CCL4, CCL5, CCL19, CCR7, ICAM2, IL1B                                                                                                        | 7  |
| Hematological System Development and Function | chemoattraction | chemoattraction of leukocytes               | 2,34E-16 | C3, CCL2, CCL3, CCL4, CCL5, CCL18, CCL19, CCL20, CXCL1, CXCL9, CXCL10, CXCL13, CXCR3, IL16, IL12RB1, XCL1                                         | 16 |
| Hematological System Development and Function | chemoattraction | chemoattraction of lymphocytes              | 3,48E-12 | CCL2, CCL3, CCL4, CCL5, CCL18, CXCL9, CXCL10, CXCL13, CXCR3, IL16                                                                                 | 10 |
| Hematological System Development and Function | chemoattraction | chemoattraction of antigen presenting cells | 8,00E-11 | CCL2, CCL3, CCL4, CCL5, CCL19, CCL20, CXCL9, CXCR3, IL12RB1                                                                                       | 9  |
| Hematological System Development and Function | chemoattraction | chemoattraction of macrophages              | 1,29E-10 | CCL2, CCL3, CCL4, CCL5, CXCL9, CXCR3, IL12RB1                                                                                                     | 7  |
| Hematological System Development and Function | chemoattraction | chemoattraction of phagocytes               | 4,55E-10 | CCL2, CCL3, CCL4, CCL5, CXCL1, CXCL9, CXCR3, IL12RB1, XCL1                                                                                        | 9  |
| Hematological System Development and Function | selection       | selection of T lymphocytes                  | 3,41E-16 | CD4, CD28, CD1D, CD3D, CD3E, DOCK2, HLA-DOA, ITK, PTPRC, RHOH, SIT1, TNFRSF25, TRAT1, VAV1, ZAP70                                                 | 15 |
| Hematological System Development and Function | selection       | selection of thymocytes                     | 1,11E-08 | CD28, HLA-DOA, ITK, RHOH, SIT1, TNFRSF25, TRAT1                                                                                                   | 7  |
| Hematological System Development and Function | response        | response of lymphocytes                     | 6,71E-16 | CCL19, CCL21, CD4, CD22, CD28, CD86, CD1D, CD3E, CXCL9, CXCL11, DAPP1, GZMB, ICOS, IL10RA, IL12RB1, IL27RA, ITK, LAX1, LTB, PSMB10, SELPLG, STAT4 | 22 |
| Hematological System Development and          | response        | T cell response                             | 7,24E-14 | CCL19, CCL21, CD4, CD28, CD86, CD1D, CD3E, CXCL9, CXCL11, ICOS, IL10RA, IL12RB1, IL27RA, ITK, LAX1, LTB, PSMB10, SELPLG, STAT4                    | 19 |

| Function                                      |              |                                        |          |                                                                                                                                                                                |    |
|-----------------------------------------------|--------------|----------------------------------------|----------|--------------------------------------------------------------------------------------------------------------------------------------------------------------------------------|----|
| Hematological System Development and Function | infiltration | infiltration by mononuclear leukocytes | 7,26E-15 | C3, CCL2, CCL3, CCL4, CCL18, CCL19, CCL21, CCR2, CCR5, CCR7, CD86, CXCL10, DARC, IL16, IL1B, ITK, PRF1, SELPLG, TIMP1, UCP2, XCL1, ZC3H12A                                     | 22 |
| Hematological System Development and Function | infiltration | infiltration of leukocytes             | 3,62E-14 | C3, CCL2, CCL3, CCL4, CCL18, CCL19, CCL21, CCR2, CCR5, CCR7, CD86, CSF1R, CXCL10, DARC, FGB, IL16, IL1B, IL1RN, ITK, PRF1, SELPLG, STAT1, TIMP1, TNFRSF1B, UCP2, XCL1, ZC3H12A | 27 |
| Hematological System Development and Function | infiltration | infiltration by lymphocytes            | 1,51E-13 | C3, CCL3, CCL18, CCL19, CCL21, CCR2, CCR5, CCR7, CD86, CXCL10, DARC, IL16, IL1B, ITK, PRF1, SELPLG, TIMP1, UCP2, XCL1, ZC3H12A                                                 | 20 |
| Hematological System Development and Function | infiltration | infiltration by T lymphocytes          | 2,03E-13 | C3, CCL3, CCL18, CCL19, CCL21, CCR2, CCR5, CD86, CXCL10, DARC, IL16, IL1B, ITK, PRF1, SELPLG, XCL1                                                                             | 16 |
| Hematological System Development and Function | infiltration | infiltration by neutrophils            | 8,14E-12 | C2, C3, CASP1, CCL3, CCL4, CCL21, CCR2, CXCL2, CXCL10, FCER1G, IL1B, IL1RN, ITGAL, ITGB2, NCF1, RAC2, SELL, TNFRSF1B, XCL1                                                     | 19 |
| Hematological System Development and Function | infiltration | infiltration by eosinophils            | 6,64E-09 | CCL3, CCL5, CCL11, CCL21, CD2, CD48, IL27RA, IL2RB, ITK, PLA2G7, RUNX3                                                                                                         | 11 |
| Hematological System Development and Function | expansion    | expansion of lymphocytes               | 8,89E-15 | BTK, C3, CD2, CD4, CD27, CD28, CD86, CD3E, CR2, ICOS, IGHM, IL1B, IL7R, IRF1, JAK3, LCP2, PRF1, SLAMF1, STAT4, TNFRSF1B, TNFSF13B, ZAP70                                       | 22 |
| Hematological System Development and Function | expansion    | expansion of T lymphocytes             | 4,12E-13 | C3, CD2, CD4, CD27, CD28, CD86, CD3E, ICOS, IGHM, IL1B, IRF1, JAK3, LCP2, PRF1, SLAMF1, STAT4, TNFRSF1B, TNFSF13B, ZAP70                                                       | 19 |
| Hematological System Development and Function | generation   | generation of lymphocytes              | 3,58E-14 | C3, CD4, CD28, CD86, CR2, HLA-DQB1, ICOS, IL10RA, IL12RB1, IL1RN, IL27RA, IL2RG, IL7R, IRF4, ITK, JAK3, PSMB9, STAT4, TNFSF13B                                                 | 19 |
| Hematological System Development and Function | generation   | generation of T lymphocytes            | 2,01E-10 | CD4, CD28, CD86, HLA-DQB1, ICOS, IL10RA, IL12RB1, IL27RA, IL2RG, ITK, JAK3, PSMB9, STAT4, TNFSF13B                                                                             | 14 |
| Hematological System Development              | survival     | survival of lymphocytes                | 2,80E-13 | BTK, BTLA, CD19, CD22, CD28, CD86, CD3E, CD8A, HCK, ICOS, IL2RB, IL2RG, JAK3, LAX1, MYB (includes EG:4602), PRKCB, PTPRC, STAT1, STAT4, TNFRSF17, TNFRSF1B, TNFSF13B           | 22 |

|                                               |               |                                    |          |                                                                                                                       |    |
|-----------------------------------------------|---------------|------------------------------------|----------|-----------------------------------------------------------------------------------------------------------------------|----|
| Hematological System Development and Function | survival      | survival of T lymphocytes          | 3,14E-10 | BTLA, CD28, CD86, CD3E, CD8A, ICOS, IL2RB, IL2RG, JAK3, LAX1, MYB (includes EG:4602), PTPRC, STAT1, STAT4, TNFRSF1B   | 15 |
| Hematological System Development and Function | attraction    | attraction of T lymphocytes        | 3,00E-13 | CCL2, CCL4, CCL5, CCL11, CCL19, CCL21, CCR5, CXCL9, CXCL10, CXCL11, IL16, XCL1                                        | 12 |
| Hematological System Development and Function | attraction    | attraction of monocytes            | 2,68E-09 | CCL2, CCL3, CCL4, CCL5, CXCL9, CXCL10, IL1B                                                                           | 7  |
| Hematological System Development and Function | attraction    | attraction of memory T lymphocytes | 4,36E-09 | CCL4, CCL5, CCL11, CXCL9, CXCL10, CXCL11                                                                              | 6  |
| Hematological System Development and Function | function      | function of lymphocytes            | 1,21E-11 | CD4, CD28, CD86, ICOS, IL10RA, JAK3, KLRK1, LAX1, PRF1, SH2D1A, SLPI, STAT4, TLR8 (includes EG:51311), TNFSF13B, VAV1 | 15 |
| Hematological System Development and Function | function      | function of T lymphocytes          | 2,65E-08 | CD4, CD28, ICOS, IL10RA, JAK3, LAX1, PRF1, SH2D1A, STAT4, TLR8 (includes EG:51311), VAV1                              | 11 |
| Hematological System Development and Function | mobilization  | mobilization of leukocytes         | 1,22E-11 | CCL2, CCL3, CCL4, CCL11, CCL20, CCR5, CXCL2, CXCL10, CXCR3, FPR1, IL1B, ITGB2                                         | 12 |
| Hematological System Development and Function | mobilization  | mobilization of blood cells        | 1,14E-10 | CCL2, CCL3, CCL4, CCL11, CCL20, CCR5, CXCL2, CXCL10, CXCR3, FPR1, IL1B, ITGB2, SELL                                   | 13 |
| Hematological System Development and Function | mobilization  | mobilization of myeloid cells      | 2,07E-08 | CCL2, CCL3, CCL4, CCL11, CXCL2, CXCL10, FPR1, IL1B                                                                    | 8  |
| Hematological System Development and Function | extravasation | extravasation of phagocytes        | 1,96E-11 | CCL2, CCL3, CCL4, CCL5, CXCL1, IL1B, ITGB2, LSP1, SELL                                                                | 9  |
| Hematological System Development and Function | extravasation | extravasation of leukocytes        | 5,78E-11 | CCL2, CCL3, CCL4, CCL5, CCR2, CCR5, CXCL1, IL1B, ITGB2, LSP1, SELL                                                    | 11 |

|                                               |                               |                                                |          |                                                                                                                     |    |
|-----------------------------------------------|-------------------------------|------------------------------------------------|----------|---------------------------------------------------------------------------------------------------------------------|----|
| Development and Function Hematological System | extravasation                 | extravasation of antigen presenting cells      | 4,36E-09 | CCL2, CCL3, CCL4, CCL5, CCR2, CCR5                                                                                  | 6  |
| Development and Function Hematological System | trafficking                   | trafficking of leukocytes                      | 3,81E-11 | CCL3, CCL4, CCL5, CCL19, CCL20, CCR2, CCR5, CXCL10, CXCL13, ITGB2, TNFRSF1B                                         | 11 |
| Development and Function Hematological System | presence                      | presence of leukocytes                         | 7,53E-10 | C3, CCL19, CCL21, CCR7, CR2, CXCL13, FGR, HCK, JAK3                                                                 | 9  |
| Development and Function Hematological System | stimulation                   | stimulation of leukocytes                      | 2,52E-09 | C3, CCL5, CCL11, CCL20, CD2, CD28, CD86, CD1D, ICOS, IL1B, KLRK1, PTPRC, SLAMF1, TAC1, TNFRSF25, TNFSF13B           | 16 |
| Development and Function Hematological System | stimulation                   | stimulation of T lymphocytes                   | 4,02E-08 | C3, CD2, CD28, CD86, CD1D, ICOS, KLRK1, PTPRC, SLAMF1, TNFRSF25, TNFSF13B                                           | 11 |
| Development and Function Hematological System | stimulation                   | stimulation of mononuclear leukocytes          | 5,28E-08 | C3, CCL20, CD2, CD28, CD86, CD1D, ICOS, KLRK1, PTPRC, SLAMF1, TNFRSF25, TNFSF13B                                    | 12 |
| Development and Function Hematological System | maturation                    | maturation of lymphocytes                      | 9,91E-09 | BTK, BTLA, CD4, CD19, CD28, CD86, CD247, IGHM, ITK, LCK, PTPRC, RHOH, RUNX3, TNFSF13B, VAV1                         | 15 |
| Development and Function Hematological System | polarization                  | polarization of T lymphocytes                  | 1,08E-08 | CCL19, CD28, ICOS, IL12RB1, IL1B, IRF4, LCK, RASSF5, SLAMF1, STAT4, VAV1                                            | 11 |
| Development and Function Hematological System | activation-induced cell death | activation-induced cell death of T lymphocytes | 1,83E-08 | CCR5, CD28, CD3E, CIITA, ITK, MAP4K1, PRF1, RAC2, STAT1                                                             | 9  |
| Development and Function Hematological System | positive selection            | positive selection of T lymphocytes            | 6,77E-08 | CD4, ITK, RHOH, SIT1, TRAT1, VAV1                                                                                   | 6  |
| Development and Function Hematological System | aggregation                   | aggregation of blood                           | 7,98E-08 | BTK, CCL5, CCL11, CD4, CXCL9, CXCL10, CXCR3, FCER1G, FPR1, HCLS1, IGHM, ITGAL, ITGB2, LCK, LCP2, SELL, SELPLG, VAV1 | 18 |

| System Development and Function |            | cells                                  |          |                                                                                                                                                                                                                                                                                                                                                                                                                                                                                                                                                                                                                                                                                                               |    |  |
|---------------------------------|------------|----------------------------------------|----------|---------------------------------------------------------------------------------------------------------------------------------------------------------------------------------------------------------------------------------------------------------------------------------------------------------------------------------------------------------------------------------------------------------------------------------------------------------------------------------------------------------------------------------------------------------------------------------------------------------------------------------------------------------------------------------------------------------------|----|--|
| Immune Cell Trafficking         | activation | activation of leukocytes               | 7,25E-61 | ADA, BTK, C3, C1QA, C3AR1, CCL2, CCL3, CCL4, CCL5, CCL11, CCR2, CD2, CD4, CD14, CD19, CD22, CD27, CD28, CD48, CD86, CD163, CD247, CD1C, CD1D, CD1E, CD300A, CD3E, CD8A, CLEC4C, CLEC5A, CLEC7A, CORO1A, CR2, CSF1R, CXCL1, CXCL6, CXCL9, CXCL10, DEF6, DOCK2, FCER1G, FPR1, FYB, GNLY, GZMA, GZMB, HCK, HLA-DMB, HLA-DOA, HLA-DQA1, HLA-DQB1, HLA-DRB1, ICOS, IGHG1, IGHM, IL16, IL12RB1, IL18RAP, IL1B, IL1RN, IL27RA, IL2RB, IMPDH1, ITGAL, ITGB2, ITK, JAK3, KLRK1, LAX1, LCK, LCN2, LCP2, LILRB1, LTB, LTF, LY96, NCF1C, POU2AF1, PRF1, PSMB9, PTPRC, SELL, SIRPG, SIT1, SLAMF1, SLAMF6, SLPI, STAT1, STAT4, TAC1, TCL1A, TLR7, TLR8 (includes EG:51311), TNFRSF17, TNFRSF1B, TNFSF13B, TYROBP, VAV1, WAS | 99 |  |
| Immune Cell Trafficking         | activation | activation of mononuclear leukocytes   | 1,47E-49 | ADA, BTK, C3, C1QA, C3AR1, CCL2, CCL3, CCL4, CCL5, CCL11, CCR2, CD2, CD4, CD14, CD19, CD22, CD27, CD28, CD48, CD86, CD163, CD247, CD1C, CD1D, CD1E, CD3E, CD8A, CLEC4C, CLEC5A, CLEC7A, CORO1A, CR2, DEF6, DOCK2, FCER1G, GZMA, GZMB, HLA-DRB1, ICOS, IGHG1, IGHM, IL12RB1, IL1B, IL1RN, IL27RA, IL2RB, IMPDH1, ITGAL, ITGB2, ITK, JAK3, KLRK1, LAX1, LCK, LILRB1, LTF, LY96, NCF1C, POU2AF1, PRF1, PTPRC, SIRPG, SIT1, SLAMF1, SLAMF6, STAT1, STAT4, TAC1, TCL1A, TLR7, TLR8 (includes EG:51311), TNFRSF17, TNFRSF1B, TNFSF13B, TYROBP, VAV1, WAS                                                                                                                                                            | 77 |  |
| Immune Cell Trafficking         | activation | activation of lymphocytes              | 7,12E-47 | ADA, BTK, C3, C1QA, C3AR1, CCL2, CCL3, CCL4, CCL5, CCL11, CCR2, CD2, CD4, CD19, CD22, CD27, CD28, CD48, CD86, CD247, CD1C, CD1D, CD1E, CD3E, CD8A, CLEC4C, CLEC7A, CORO1A, CR2, DEF6, DOCK2, FCER1G, GZMA, GZMB, HLA-DRB1, ICOS, IGHG1, IGHM, IL12RB1, IL1B, IL1RN, IL27RA, IL2RB, IMPDH1, ITGAL, ITGB2, ITK, JAK3, KLRK1, LAX1, LCK, LILRB1, LTF, NCF1C, POU2AF1, PRF1, PTPRC, SIRPG, SIT1, SLAMF1, SLAMF6, STAT1, STAT4, TAC1, TCL1A, TLR7, TLR8 (includes EG:51311), TNFRSF17, TNFRSF1B, TNFSF13B, TYROBP, VAV1, WAS                                                                                                                                                                                       | 73 |  |
| Immune Cell Trafficking         | activation | activation of T lymphocytes            | 1,78E-36 | ADA, C3, C3AR1, CCL2, CCL3, CCL4, CCL5, CCL11, CCR2, CD2, CD4, CD28, CD48, CD86, CD247, CD1D, CD3E, CD8A, CLEC4C, CLEC7A, CORO1A, DEF6, DOCK2, FCER1G, GZMA, GZMB, HLA-DRB1, ICOS, IGHG1, IL1B, IL27RA, IL2RB, IMPDH1, ITGAL, ITGB2, ITK, JAK3, LAX1, LCK, LILRB1, NCF1C, PRF1, PTPRC, SIRPG, SIT1, SLAMF1, STAT1, STAT4, TAC1, TCL1A, TLR7, TLR8 (includes EG:51311), TNFRSF1B, TYROBP, VAV1, WAS                                                                                                                                                                                                                                                                                                            | 56 |  |
| Immune Cell Trafficking         | activation | activation of granulocytes             | 3,31E-17 | C3, CCL2, CCL3, CCL4, CCL5, CCL11, CD14, CXCL1, CXCL6, CXCL9, FPR1, IL16, IL18RAP, IL1B, IL1RN, ITGB2, LCN2, LTF, NCF1C, SELL, TAC1, VAV1                                                                                                                                                                                                                                                                                                                                                                                                                                                                                                                                                                     | 22 |  |
| Immune Cell Trafficking         | activation | activation of neutrophils              | 1,03E-14 | C3, CCL2, CCL3, CCL4, CCL5, CD14, CXCL1, CXCL6, FPR1, IL18RAP, IL1B, IL1RN, LCN2, LTF, NCF1C, SELL, TAC1, VAV1                                                                                                                                                                                                                                                                                                                                                                                                                                                                                                                                                                                                | 18 |  |
| Immune Cell Trafficking         | activation | activation of antigen presenting cells | 9,47E-14 | CCL2, CCL3, CCL4, CCL5, CD4, CD86, CD1D, CSF1R, CXCL10, FCER1G, HCK, HLA-DMB, HLA-DOA, HLA-DQA1, HLA-DQB1, IGHM, IL1B, LTB, LTF, PSMB9, SLPI, STAT1, STAT4, TAC1, TLR7, TNFRSF1B                                                                                                                                                                                                                                                                                                                                                                                                                                                                                                                              | 26 |  |
| Immune Cell Trafficking         | activation | activation of phagocytes               | 1,23E-13 | C3, CCL2, CCL3, CCL4, CCL5, CD4, CD14, CSF1R, CXCL1, CXCL6, CXCL10, FCER1G, FPR1, HCK, IL18RAP, IL1B, IL1RN, LCN2, LTF, NCF1C, SELL, STAT1, STAT4, TAC1, VAV1                                                                                                                                                                                                                                                                                                                                                                                                                                                                                                                                                 | 25 |  |
| Immune Cell Trafficking         | activation | activation of natural killer cells     | 1,63E-12 | CCL5, CD2, CD4, CD27, CD28, CD1D, IL12RB1, IL1B, IL1RN, IL2RB, ITGAL, ITGB2, KLRK1, LTF, PRF1, SLAMF6, STAT4, TAC1, TYROBP                                                                                                                                                                                                                                                                                                                                                                                                                                                                                                                                                                                    | 19 |  |
| Immune Cell Trafficking         | activation | activation of mast cells               | 4,94E-11 | C3, CCL3, CCL5, CCR2, CD48, CD300A, FCER1G, FYB, IL27RA, LCP2, TAC1, TLR7, TLR8 (includes EG:51311)                                                                                                                                                                                                                                                                                                                                                                                                                                                                                                                                                                                                           | 13 |  |
| Immune Cell Trafficking         | activation | activation of B lymphocytes            | 3,87E-10 | ADA, BTK, C1QA, CD19, CD22, CD86, CD8A, CR2, IGHG1, IGHM, LAX1, POU2AF1, PTPRC, TNFRSF17, TNFSF13B, VAV1                                                                                                                                                                                                                                                                                                                                                                                                                                                                                                                                                                                                      | 16 |  |
| Immune Cell Trafficking         | migration  | migration of leukocytes                | 8,60E-44 | ALOX5, C3, CCL2, CCL3, CCL4, CCL5, CCL11, CCL18, CCL19, CCL20, CCL21, CCR2, CCR5, CCR7, CD2, CD4, CD22, CD28, CD48, CD69, CD86, CD247, CD3E, CD8A, CORO1A, CSF1R, CSF3R, CTSS, CXCL1, CXCL2, CXCL6, CXCL9, CXCL10, CXCL11, CXCL13, CXCR3, CYSLTR1, CYTIP, DARC, DOCK2, FCER1G, FGR, FPR1, FYB, GNLY, HCK, ICAM2, ICOS, IL16, IL10RA, IL12RB1, IL1B, ITGAL, ITGAX, ITGB2, ITK, LCK, LSP1, LTF, MMP7, PIK3R5, PRF1, PRKCB, PTPN6, PTPRC, RAC2, RASSF5, RGS1, RUNX3, S100A8, SAA1, SELL, SELPLG, SERPINA3, SLPI,                                                                                                                                                                                                 | 81 |  |

|                         |               |                                          |          |                                                                                                                                                                                                                                                                                                                                                                                                                                                                                                                                         |    |
|-------------------------|---------------|------------------------------------------|----------|-----------------------------------------------------------------------------------------------------------------------------------------------------------------------------------------------------------------------------------------------------------------------------------------------------------------------------------------------------------------------------------------------------------------------------------------------------------------------------------------------------------------------------------------|----|
|                         |               |                                          |          | TAC1, TIMP1, TNFRSF1B, TNFSF13B, WAS, XCL1                                                                                                                                                                                                                                                                                                                                                                                                                                                                                              |    |
| Immune Cell Trafficking | migration     | migration of mononuclear leukocytes      | 8,88E-33 | ALOX5, C3, CCL2, CCL3, CCL4, CCL5, CCL11, CCL18, CCL19, CCL20, CCL21, CCR2, CCR5, CCR7, CD2, CD4, CD22, CD28, CD48, CD69, CD86, CD247, CD3E, CD8A, CTSS, CXCL9, CXCL10, CXCL11, CXCL13, CXCR3, CYSLTR1, CYTIP, DARC, DOCK2, FYB, GNLY, ICAM2, ICOS, IL16, IL1B, ITGAL, ITGAX, ITGB2, ITK, LCK, PRF1, RASSF5, SELL, SELPLG, TAC1, TIMP1, TNFRSF1B, TNFSF13B, WAS, XCL1                                                                                                                                                                   | 55 |
| Immune Cell Trafficking | migration     | Lymphocyte migration                     | 1,14E-32 | ALOX5, C3, CCL2, CCL3, CCL4, CCL5, CCL11, CCL18, CCL19, CCL20, CCL21, CCR2, CCR5, CCR7, CD2, CD4, CD22, CD28, CD48, CD69, CD86, CD247, CD3E, CD8A, CXCL9, CXCL10, CXCL11, CXCL13, CXCR3, CYSLTR1, CYTIP, DARC, DOCK2, FYB, GNLY, ICAM2, ICOS, IL16, IL1B, ITGAL, ITGB2, ITK, LCK, PRF1, RASSF5, SELL, SELPLG, TAC1, TIMP1, TNFRSF1B, TNFSF13B, WAS, XCL1                                                                                                                                                                                | 53 |
| Immune Cell Trafficking | migration     | T cell migration                         | 1,94E-25 | ALOX5, C3, CCL2, CCL3, CCL4, CCL5, CCL11, CCL18, CCL19, CCL20, CCL21, CCR2, CCR5, CCR7, CD4, CD28, CD69, CD86, CXCL9, CXCL10, CXCL11, CXCL13, CXCR3, CYSLTR1, DARC, DOCK2, FYB, GNLY, ICOS, IL16, IL1B, ITGB2, ITK, LCK, PRF1, SELL, SELPLG, WAS, XCL1                                                                                                                                                                                                                                                                                  | 39 |
| Immune Cell Trafficking | migration     | migration of granulocytes                | 2,47E-21 | C3, CCL3, CCL4, CCL5, CCL11, CXCL1, CXCL2, CXCL6, CXCL9, CXCL10, CXCL11, DARC, FGR, FPR1, HCK, ICAM2, IL16, IL1B, ITGAL, ITGAX, ITGB2, LSP1, LTF, MMP7, PIK3R5, S100A8, SAA1, SELL, SLPI                                                                                                                                                                                                                                                                                                                                                | 29 |
| Immune Cell Trafficking | migration     | migration of antigen presenting cells    | 2,78E-21 | C3, CCL2, CCL3, CCL4, CCL5, CCL19, CCL20, CCL21, CCR2, CCR5, CCR7, CD86, CSF1R, CXCL1, CXCL9, CXCL10, CXCL11, CXCL13, CXCR3, ICAM2, IL16, IL10RA, IL1B, RAC2, RUNX3, TAC1, TIMP1, WAS                                                                                                                                                                                                                                                                                                                                                   | 28 |
| Immune Cell Trafficking | migration     | migration of dendritic cells             | 3,57E-21 | C3, CCL3, CCL4, CCL5, CCL19, CCL20, CCL21, CCR2, CCR5, CCR7, CD86, CXCL9, CXCL10, CXCL11, CXCL13, CXCR3, ICAM2, IL16, IL10RA, IL1B, RAC2, RUNX3, TAC1, TIMP1, WAS                                                                                                                                                                                                                                                                                                                                                                       | 25 |
| Immune Cell Trafficking | migration     | migration of phagocytes                  | 3,90E-15 | CCL2, CCL3, CCL5, CSF1R, CXCL1, CXCL2, CXCL6, DARC, FGR, FPR1, HCK, IL1B, ITGAL, ITGAX, ITGB2, LSP1, MMP7, PIK3R5, RAC2, S100A8, SAA1, SELL, SLPI                                                                                                                                                                                                                                                                                                                                                                                       | 23 |
| Immune Cell Trafficking | migration     | migration of neutrophils                 | 1,41E-14 | CCL3, CCL5, CXCL1, CXCL2, CXCL6, DARC, FGR, FPR1, HCK, IL1B, ITGAL, ITGAX, ITGB2, LSP1, MMP7, PIK3R5, S100A8, SAA1, SELL, SLPI                                                                                                                                                                                                                                                                                                                                                                                                          | 20 |
| Immune Cell Trafficking | migration     | migration of eosinophils                 | 2,90E-14 | C3, CCL4, CCL5, CCL11, CXCL2, CXCL9, CXCL10, CXCL11, ICAM2, IL16, IL1B, ITGAL, ITGB2, LTF                                                                                                                                                                                                                                                                                                                                                                                                                                               | 14 |
| Immune Cell Trafficking | migration     | migration of peripheral blood leukocytes | 1,21E-09 | CCL3, CCL4, CCL5, CCL19, CCL21, CCR5, CCR7, CXCL13, CXCR3                                                                                                                                                                                                                                                                                                                                                                                                                                                                               | 9  |
| Immune Cell Trafficking | migration     | migration of B lymphocytes               | 3,61E-09 | CCL19, CCL20, CCL21, CD22, CXCL13, DOCK2, ICOS, TIMP1, TNFRSF1B, TNFSF13B                                                                                                                                                                                                                                                                                                                                                                                                                                                               | 10 |
| Immune Cell Trafficking | migration     | migration of memory T lymphocytes        | 4,11E-08 | CCL21, CD28, CXCL11, CXCL13, ICOS                                                                                                                                                                                                                                                                                                                                                                                                                                                                                                       | 5  |
| Immune Cell Trafficking | migration     | migration of PBMC cells                  | 6,77E-08 | CCL3, CCL4, CCL19, CCL21, CCR7, CXCL13                                                                                                                                                                                                                                                                                                                                                                                                                                                                                                  | 6  |
| Immune Cell Trafficking | migration     | NK cell migration                        | 1,07E-07 | CCL3, CCL5, CCL21, CXCL9, CXCL10, CXCR3, IL16, SELL, XCL1                                                                                                                                                                                                                                                                                                                                                                                                                                                                               | 9  |
| Immune Cell Trafficking | cell movement | cell movement of leukocytes              | 2,18E-40 | C2, C3, CASP1, CCL2, CCL3, CCL4, CCL5, CCL11, CCL18, CCL19, CCL20, CCL21, CCR2, CCR5, CCR7, CD2, CD4, CD14, CD28, CD48, CD86, CORO1A, CSF1R, CSF3R, CTSS, CXCL1, CXCL2, CXCL6, CXCL9, CXCL10, CXCL11, CXCL13, CXCR3, CYSLTR1, DARC, FCER1G, FGB, FGR, FPR1, GNLY, HCK, ICAM2, IGHG1, IL16, IL12RB1, IL1B, IL1RN, IL27RA, IL2RB, ITGAL, ITGAX, ITGB2, ITK, LSP1, NCF1, PLA2G7, POU2AF1, PRF1, PRKCB, PTPN6, PTPRC, RAC2, RGS1, RUNX3, S100A8, SAA1, SELL, SELPLG, SERPINA3, SLPI, STAT1, TAC1, TIMP1, TNFRSF1B, UCP2, WAS, XCL1, ZC3H12A | 78 |
| Immune Cell Trafficking | cell movement | cell movement of myeloid cells           | 2,53E-29 | C2, C3, CASP1, CCL2, CCL3, CCL4, CCL5, CCL11, CCL21, CCR2, CD2, CD28, CD48, CORO1A, CSF3R, CXCL1, CXCL2, CXCL6, CXCL9, CXCL10, CXCR3, FCER1G, FGR, FPR1, HCK, ICAM2, IL1B, IL1RN, IL27RA, IL2RB, ITGAL, ITGAX, ITGB2, ITK, LSP1, NCF1, PLA2G7, PTPN6, PTPRC, RAC2, RUNX3, S100A8, SELL, SELPLG, SLPI, TAC1, TNFRSF1B, WAS, XCL1                                                                                                                                                                                                         | 49 |
| Immune Cell             | cell movement | cell movement                            | 2,19E-28 | C2, C3, CASP1, CCL2, CCL3, CCL4, CCL5, CCL11, CCL21, CCR2, CD2, CD28, CD48, CORO1A, CSF3R, CXCL1, CXCL2, CXCL6, CXCL9, CXCL10, CXCR3,                                                                                                                                                                                                                                                                                                                                                                                                   | 48 |

|                         |               |                                           |          |                                                                                                                                                                                                                                                                                                                        |    |
|-------------------------|---------------|-------------------------------------------|----------|------------------------------------------------------------------------------------------------------------------------------------------------------------------------------------------------------------------------------------------------------------------------------------------------------------------------|----|
| Trafficking             | t             | of granulocytes                           |          | FCER1G, FGR, FPR1, HCK, ICAM2, IL1B, IL1RN, IL27RA, IL2RB, ITGAL, ITGAX, ITGB2, ITK, LSP1, NCF1, PLA2G7, PTPN6, RAC2, RUNX3, S100A8, SELL, SELPLG, SLPI, TAC1, TNFRSF1B, WAS, XCL1                                                                                                                                     |    |
| Immune Cell Trafficking | cell movement | cell movement of mononuclear leukocytes   | 1,57E-26 | C3, CCL2, CCL3, CCL4, CCL5, CCL11, CCL18, CCL19, CCL20, CCL21, CCR2, CCR5, CCR7, CD28, CD86, CTSS, CXCL9, CXCL10, CXCL11, CXCL13, CXCR3, CYSLTR1, DARC, FPR1, GNL1, IGHG1, IL16, IL1B, ITGAL, ITGAX, ITGB2, ITK, POU2AF1, PRF1, PRKCB, RAC2, RGS1, SAA1, SELL, SELPLG, SERPINA3, TAC1, TIMP1, UCP2, WAS, XCL1, ZC3H12A | 47 |
| Immune Cell Trafficking | cell movement | cell movement of lymphocytes              | 5,86E-25 | C3, CCL2, CCL3, CCL4, CCL5, CCL11, CCL18, CCL19, CCL20, CCL21, CCR2, CCR5, CCR7, CD28, CD86, CXCL9, CXCL10, CXCL11, CXCL13, CXCR3, CYSLTR1, DARC, GNL1, IGHG1, IL16, IL1B, ITGB2, ITK, POU2AF1, PRF1, RAC2, RGS1, SAA1, SELL, SELPLG, TAC1, TIMP1, UCP2, WAS, XCL1, ZC3H12A                                            | 41 |
| Immune Cell Trafficking | cell movement | cell movement of phagocytes               | 1,13E-24 | C2, C3, CASP1, CCL2, CCL3, CCL4, CCL5, CCL21, CCR2, CCR5, CD28, CORO1A, CSF1R, CSF3R, CXCL1, CXCL2, CXCL6, CXCL9, CXCL10, CXCR3, DARC, FCER1G, FGR, FPR1, HCK, IL16, IL12RB1, IL1B, IL1RN, ITGAL, ITGAX, ITGB2, LSP1, NCF1, PTPN6, RAC2, S100A8, SAA1, SELL, SELPLG, SLPI, TAC1, TNFRSF1B, WAS, XCL1                   | 45 |
| Immune Cell Trafficking | cell movement | cell movement of neutrophils              | 4,52E-22 | C2, C3, CASP1, CCL2, CCL3, CCL4, CCL5, CCL21, CCR2, CD28, CORO1A, CSF3R, CXCL1, CXCL2, CXCL6, CXCL10, FCER1G, FGR, FPR1, HCK, IL1B, IL1RN, ITGAL, ITGAX, ITGB2, LSP1, NCF1, PTPN6, RAC2, S100A8, SELL, SELPLG, SLPI, TAC1, TNFRSF1B, WAS, XCL1                                                                         | 37 |
| Immune Cell Trafficking | cell movement | cell movement of T lymphocytes            | 1,37E-18 | C3, CCL2, CCL3, CCL4, CCL5, CCL11, CCL18, CCL19, CCL20, CCL21, CCR2, CCR5, CCR7, CD28, CD86, CXCL9, CXCL10, CXCL11, CYSLTR1, DARC, GNL1, IL16, IL1B, ITGB2, ITK, PRF1, SELL, SELPLG, XCL1                                                                                                                              | 29 |
| Immune Cell Trafficking | cell movement | cell movement of antigen presenting cells | 2,47E-18 | C3, CCL2, CCL3, CCL4, CCL5, CCL11, CCL19, CCL20, CCL21, CCR2, CCR5, CCR7, CD86, CSF1R, CXCL9, CXCL10, CXCR3, DARC, FPR1, GNL1, ICAM2, IL16, IL12RB1, IL1B, IL1RN, ITGB2, RAC2, SAA1, SELL, TAC1                                                                                                                        | 30 |
| Immune Cell Trafficking | cell movement | cell movement of eosinophils              | 3,31E-17 | C3, CCL2, CCL3, CCL5, CCL11, CCL21, CD2, CD48, CXCL9, CXCL10, CXCR3, FPR1, ICAM2, IL1B, IL27RA, IL2RB, ITGAL, ITGB2, ITK, PLA2G7, RUNX3, WAS                                                                                                                                                                           | 22 |
| Immune Cell Trafficking | cell movement | cell movement of dendritic cells          | 1,41E-12 | CCL2, CCL3, CCL4, CCL5, CCL11, CCL19, CCL20, CCL21, CCR7, CD86, FPR1, GNL1, ICAM2, IL16, IL1B, TAC1                                                                                                                                                                                                                    | 16 |
| Immune Cell Trafficking | cell movement | cell movement of memory T lymphocytes     | 1,68E-12 | CCL2, CCL5, CCL19, CCL21, CCR7, CD28, CXCL9, CXCL11, GNL1, ITGB2                                                                                                                                                                                                                                                       | 10 |
| Immune Cell Trafficking | cell movement | cell movement of macrophages              | 1,01E-11 | C3, CCL2, CCL3, CCL4, CCL5, CCR2, CCR5, CSF1R, CXCL9, CXCL10, CXCR3, DARC, IL16, IL12RB1, IL1B, IL1RN, ITGB2, RAC2, SAA1, SELL                                                                                                                                                                                         | 20 |
| Immune Cell Trafficking | cell movement | cell movement of bone marrow cells        | 1,97E-11 | CCL2, CCL3, CCL4, CCL11, CXCL2, CXCL9, CXCL10, FPR1, ICAM2, IL1RN, ITGAL, ITGAX, ITGB2, LSP1, SLPI                                                                                                                                                                                                                     | 15 |
| Immune Cell Trafficking | cell movement | cell movement of B lymphocytes            | 1,39E-10 | CCL18, CCL19, CCL20, CCL21, CCR2, CXCL9, CXCL13, POU2AF1, RAC2, RGS1, SELPLG, ZC3H12A                                                                                                                                                                                                                                  | 12 |
| Immune Cell Trafficking | cell movement | cell movement of mononuclear cells        | 2,62E-10 | CCL2, CCL3, CCL4, CCL20, CCR2, CCR5, CIITA, ICOS, JAK3, LTB, TCIRG1                                                                                                                                                                                                                                                    | 11 |
| Immune Cell Trafficking | cell movement | cell movement of                          | 1,72E-09 | CCL2, CCL3, CCL4, CCL5, CCL11, CCR2, CTSS, CXCL9, CXCL10, FPR1, GNL1, IL1B, ITGAL, ITGAX, ITGB2, PRKCB, SERPINA3                                                                                                                                                                                                       | 17 |



|                         |               |                                       |          |                                                                                                                                                                                                                                                                                                                                               |    |
|-------------------------|---------------|---------------------------------------|----------|-----------------------------------------------------------------------------------------------------------------------------------------------------------------------------------------------------------------------------------------------------------------------------------------------------------------------------------------------|----|
|                         |               | monocytes                             |          |                                                                                                                                                                                                                                                                                                                                               |    |
| Immune Cell Trafficking | cell movement | cell movement of naive lymphocytes    | 1,28E-08 | CCL18, CCL19, CCL20, CCL21, CCR7, SELL                                                                                                                                                                                                                                                                                                        | 6  |
| Immune Cell Trafficking | cell movement | cell movement of leukocyte cell lines | 1,46E-08 | C3, CCL3, CCL5, CCL19, CCL21, CCR7, CXCL11, CXCL13, CXCR3, ITGB2, RGS1, WAS                                                                                                                                                                                                                                                                   | 12 |
| Immune Cell Trafficking | homing        | homing of leukocytes                  | 2,34E-29 | C3, CCL2, CCL3, CCL4, CCL5, CCL11, CCL18, CCL19, CCL20, CCL21, CCR2, CCR5, CCR7, CD4, CD28, CORO1A, CSF3R, CXCL1, CXCL2, CXCL6, CXCL9, CXCL10, CXCL11, CXCL13, CXCR3, CYSLTR1, FCER1G, FGR, FPR1, GNLY, HCK, IGHG1, IL16, IL12RB1, IL1B, ITGAL, ITGB2, LSP1, PRKCB, PTPN6, PTPRC, RAC2, RGS1, S100A8, SAA1, SELPLG, SERPINA3, TAC1, WAS, XCL1 | 50 |
| Immune Cell Trafficking | homing        | homing of mononuclear leukocytes      | 9,53E-21 | CCL2, CCL3, CCL4, CCL5, CCL11, CCL18, CCL19, CCL20, CCL21, CCR2, CCR5, CCR7, CXCL9, CXCL10, CXCL11, CXCL13, CXCR3, CYSLTR1, FPR1, GNLY, IGHG1, IL16, IL1B, ITGAL, PRKCB, RAC2, RGS1, SAA1, SELPLG, SERPINA3, TAC1, WAS, XCL1                                                                                                                  | 33 |
| Immune Cell Trafficking | homing        | homing of myeloid cells               | 7,97E-20 | C3, CCL2, CCL3, CCL4, CCL5, CCL11, CD28, CORO1A, CSF3R, CXCL1, CXCL2, CXCL6, CXCL9, CXCL10, CXCR3, FCER1G, FGR, FPR1, HCK, IL1B, ITGB2, LSP1, PTPN6, PTPRC, RAC2, S100A8, TAC1, WAS, XCL1                                                                                                                                                     | 29 |
| Immune Cell Trafficking | homing        | homing of lymphocytes                 | 1,37E-19 | CCL2, CCL3, CCL4, CCL5, CCL11, CCL18, CCL19, CCL20, CCL21, CCR2, CCR5, CCR7, CXCL9, CXCL10, CXCL11, CXCL13, CXCR3, CYSLTR1, GNLY, IGHG1, IL16, RAC2, RGS1, SAA1, SELPLG, TAC1, WAS, XCL1                                                                                                                                                      | 28 |
| Immune Cell Trafficking | homing        | homing of phagocytes                  | 4,11E-19 | CCL2, CCL3, CCL4, CCL5, CD28, CORO1A, CSF3R, CXCL1, CXCL2, CXCL6, CXCL9, CXCL10, CXCR3, FCER1G, FGR, FPR1, HCK, IL12RB1, IL1B, ITGB2, LSP1, PTPN6, RAC2, S100A8, SAA1, TAC1, WAS, XCL1                                                                                                                                                        | 28 |
| Immune Cell Trafficking | homing        | homing of granulocytes                | 7,75E-19 | C3, CCL2, CCL3, CCL4, CCL5, CCL11, CD28, CORO1A, CSF3R, CXCL1, CXCL2, CXCL6, CXCL9, CXCL10, CXCR3, FCER1G, FGR, FPR1, HCK, IL1B, ITGB2, LSP1, PTPN6, RAC2, S100A8, TAC1, WAS, XCL1                                                                                                                                                            | 28 |
| Immune Cell Trafficking | homing        | homing of neutrophils                 | 1,56E-17 | CCL2, CCL3, CCL4, CCL5, CD28, CORO1A, CSF3R, CXCL1, CXCL2, CXCL6, CXCL10, FCER1G, FGR, FPR1, HCK, IL1B, ITGB2, LSP1, PTPN6, RAC2, S100A8, TAC1, WAS, XCL1                                                                                                                                                                                     | 24 |
| Immune Cell Trafficking | homing        | homing of T lymphocytes               | 9,00E-13 | CCL2, CCL3, CCL4, CCL5, CCL11, CCL18, CCL19, CCL20, CCL21, CCR5, CCR7, CXCL9, CXCL10, CXCL11, CYSLTR1, GNLY, IL16, SELPLG                                                                                                                                                                                                                     | 18 |
| Immune Cell Trafficking | homing        | homing of eosinophils                 | 2,60E-09 | C3, CCL2, CCL3, CCL5, CCL11, CXCL9, CXCL10, CXCR3, FPR1, WAS                                                                                                                                                                                                                                                                                  | 10 |
| Immune Cell Trafficking | homing        | homing of memory T lymphocytes        | 1,11E-08 | CCL2, CCL5, CCL19, CCL21, CCR7, CXCL9, GNLY                                                                                                                                                                                                                                                                                                   | 7  |
| Immune Cell Trafficking | chemotaxis    | chemotaxis of leukocytes              | 3,08E-27 | C3, CCL2, CCL3, CCL4, CCL5, CCL11, CCL18, CCL19, CCL20, CCL21, CCR2, CCR5, CCR7, CD4, CD28, CORO1A, CSF3R, CXCL1, CXCL2, CXCL6, CXCL9, CXCL10, CXCL11, CXCL13, CXCR3, CYSLTR1, FCER1G, FGR, FPR1, GNLY, HCK, IL16, IL12RB1, IL1B, ITGAL, ITGB2, LSP1, PRKCB, PTPN6, PTPRC, RAC2, RGS1, S100A8, SAA1, SERPINA3, TAC1, XCL1                     | 47 |
| Immune Cell Trafficking | chemotaxis    | chemotaxis of myeloid cells           | 7,75E-19 | C3, CCL2, CCL3, CCL4, CCL5, CCL11, CD28, CORO1A, CSF3R, CXCL1, CXCL2, CXCL6, CXCL9, CXCL10, CXCR3, FCER1G, FGR, FPR1, HCK, IL1B, ITGB2, LSP1, PTPN6, PTPRC, RAC2, S100A8, TAC1, XCL1                                                                                                                                                          | 28 |
| Immune Cell Trafficking | chemotaxis    | chemotaxis of mononuclear leukocytes  | 8,38E-19 | CCL2, CCL3, CCL4, CCL5, CCL11, CCL18, CCL19, CCL20, CCL21, CCR2, CCR5, CCR7, CXCL9, CXCL10, CXCL11, CXCL13, CXCR3, CYSLTR1, FPR1, GNLY, IL16, IL1B, ITGAL, PRKCB, RAC2, RGS1, SAA1, SERPINA3, TAC1, XCL1                                                                                                                                      | 30 |
| Immune Cell Trafficking | chemotaxis    | chemotaxis of phagocytes              | 3,97E-18 | CCL2, CCL3, CCL4, CCL5, CD28, CORO1A, CSF3R, CXCL1, CXCL2, CXCL6, CXCL9, CXCL10, CXCR3, FCER1G, FGR, FPR1, HCK, IL12RB1, IL1B, ITGB2, LSP1, PTPN6, RAC2, S100A8, SAA1, TAC1, XCL1                                                                                                                                                             | 27 |
| Immune Cell Trafficking | chemotaxis    | chemotaxis of granulocytes            | 7,31E-18 | C3, CCL2, CCL3, CCL4, CCL5, CCL11, CD28, CORO1A, CSF3R, CXCL1, CXCL2, CXCL6, CXCL9, CXCL10, CXCR3, FCER1G, FGR, FPR1, HCK, IL1B, ITGB2, LSP1, PTPN6, RAC2, S100A8, TAC1, XCL1                                                                                                                                                                 | 27 |
| Immune Cell Trafficking | chemotaxis    | chemotaxis of lymphocytes             | 9,70E-18 | CCL2, CCL3, CCL4, CCL5, CCL11, CCL18, CCL19, CCL20, CCL21, CCR2, CCR5, CCR7, CXCL9, CXCL10, CXCL11, CXCL13, CXCR3, CYSLTR1, GNLY, IL16, RAC2, RGS1, SAA1, TAC1, XCL1                                                                                                                                                                          | 25 |

|                         |             |                                         |          |                                                                                                                                                                                                                                                                     |    |
|-------------------------|-------------|-----------------------------------------|----------|---------------------------------------------------------------------------------------------------------------------------------------------------------------------------------------------------------------------------------------------------------------------|----|
| Immune Cell Trafficking | chemotaxis  | chemotaxis of neutrophils               | 1,64E-16 | CCL2, CCL3, CCL4, CCL5, CD28, CORO1A, CSF3R, CXCL1, CXCL2, CXCL6, CXCL10, FCER1G, FGR, FPR1, HCK, IL1B, ITGB2, LSP1, PTPN6, RAC2, S100A8, TAC1, XCL1                                                                                                                | 23 |
| Immune Cell Trafficking | chemotaxis  | chemotaxis of antigen presenting cells  | 2,54E-12 | CCL2, CCL3, CCL4, CCL5, CCL11, CCL19, CCL20, CCL21, CCR7, CXCL9, CXCR3, FPR1, GNLY, IL16, IL12RB1, IL1B, SAA1, TAC1                                                                                                                                                 | 18 |
| Immune Cell Trafficking | chemotaxis  | chemotaxis of dendritic cells           | 2,22E-11 | CCL2, CCL3, CCL4, CCL5, CCL11, CCL19, CCL20, CCL21, CCR7, FPR1, GNLY, IL16, IL1B, TAC1                                                                                                                                                                              | 14 |
| Immune Cell Trafficking | chemotaxis  | chemotaxis of T lymphocytes             | 2,84E-11 | CCL2, CCL3, CCL4, CCL5, CCL11, CCL18, CCL19, CCL20, CCL21, CCR5, CXCL9, CXCL10, CXCL11, CYSLTR1, GNLY, IL16                                                                                                                                                         | 16 |
| Immune Cell Trafficking | chemotaxis  | chemotaxis of monocytes                 | 2,68E-09 | CCL2, CCL3, CCL4, CCL5, CCL11, CCR2, CXCL9, CXCL10, FPR1, GNLY, IL1B, ITGAL, PRKCB, SERPINA3                                                                                                                                                                        | 14 |
| Immune Cell Trafficking | chemotaxis  | chemotaxis of B lymphocytes             | 2,91E-09 | CCL18, CCL19, CCL20, CCL21, CCR2, CXCL9, CXCL13, RAC2, RGS1                                                                                                                                                                                                         | 9  |
| Immune Cell Trafficking | chemotaxis  | chemotaxis of leukocyte cell lines      | 1,08E-08 | C3, CCL3, CCL5, CCL19, CCL21, CCR7, CXCL11, CXCL13, CXCR3, RGS1, WAS                                                                                                                                                                                                | 11 |
| Immune Cell Trafficking | chemotaxis  | chemotaxis of eosinophils               | 3,45E-08 | C3, CCL2, CCL3, CCL5, CCL11, CXCL9, CXCL10, CXCR3, FPR1                                                                                                                                                                                                             | 9  |
| Immune Cell Trafficking | recruitment | recruitment of leukocytes               | 6,53E-26 | BTLA, C3, C3AR1, CCL2, CCL3, CCL4, CCL5, CCL11, CCL19, CCL20, CCL21, CCR2, CCR5, CCR7, CD4, CD14, CD19, CD28, CD8A, CR2, CXCL1, CXCL2, CXCL9, CXCL10, CXCR3, DARC, IGHG1, IL1B, IL1RN, ITGB2, LSP1, LYZ, SELL, SELPLG, SLPI, TAC1, TLR7, UCP2                       | 38 |
| Immune Cell Trafficking | recruitment | recruitment of granulocytes             | 2,47E-20 | BTLA, C3, C3AR1, CCL2, CCL3, CCL4, CCL5, CCL11, CCL19, CCL20, CCR2, CD14, CD19, CD28, CD8A, CR2, CXCL1, CXCL2, CXCL9, CXCL10, DARC, IGHG1, IL1B, IL1RN, LSP1, LYZ, SLPI                                                                                             | 27 |
| Immune Cell Trafficking | recruitment | recruitment of phagocytes               | 7,71E-18 | C3AR1, CCL2, CCL3, CCL4, CCL5, CCL19, CCL20, CCR2, CCR5, CD14, CD19, CD28, CD8A, CR2, CXCL1, CXCL2, CXCL10, DARC, IL1B, IL1RN, ITGB2, LSP1, LYZ, SLPI, UCP2                                                                                                         | 25 |
| Immune Cell Trafficking | recruitment | recruitment of neutrophils              | 4,34E-17 | C3AR1, CCL2, CCL3, CCL4, CCL5, CCL19, CCL20, CCR2, CD14, CD19, CD28, CD8A, CR2, CXCL1, CXCL2, CXCL10, DARC, IL1B, IL1RN, LSP1, LYZ, SLPI                                                                                                                            | 22 |
| Immune Cell Trafficking | recruitment | recruitment of lymphocytes              | 5,29E-14 | CCL2, CCL3, CCL4, CCL5, CCL11, CCL19, CCL20, CCL21, CCR2, CCR7, CD4, CD8A, CXCL9, CXCL10, CXCR3, IL1B, SELL                                                                                                                                                         | 17 |
| Immune Cell Trafficking | recruitment | recruitment of T lymphocytes            | 1,48E-12 | CCL2, CCL3, CCL4, CCL5, CCL11, CCL19, CCL20, CCL21, CCR2, CCR7, CD4, CD8A, CXCL9, CXCL10                                                                                                                                                                            | 14 |
| Immune Cell Trafficking | recruitment | recruitment of antigen presenting cells | 3,76E-11 | C3AR1, CCL2, CCL3, CCL4, CCL5, CCL19, CCL20, CCR2, CCR5, CD8A, CXCL10, ITGB2, LSP1, UCP2                                                                                                                                                                            | 14 |
| Immune Cell Trafficking | recruitment | recruitment of dendritic cells          | 4,81E-10 | CCL2, CCL3, CCL4, CCL5, CCL19, CCL20, CCR2, CXCL10                                                                                                                                                                                                                  | 8  |
| Immune Cell Trafficking | recruitment | recruitment of monocytes                | 6,40E-09 | CCL2, CCL3, CCL4, CCL5, CCL19, CCL20, CCR2, CXCL10, IL1B                                                                                                                                                                                                            | 9  |
| Immune Cell Trafficking | recruitment | recruitment of macrophages              | 1,71E-08 | C3AR1, CCL2, CCL3, CCL4, CCR2, CCR5, CD8A, CXCL10, ITGB2, LSP1, UCP2                                                                                                                                                                                                | 11 |
| Immune Cell Trafficking | adhesion    | adhesion of leukocytes                  | 3,38E-24 | BTK, C3, C1QA, CCL2, CCL3, CCL4, CCL5, CCL11, CCL19, CCL20, CCL21, CD2, CD19, CD28, CD48, CORO1A, CSF3R, CXCL2, CXCL9, CXCL11, CXCR3, FGR, FYB, HCK, ICAM2, ICOS, IL1B, ITGAL, ITGAX, ITGB2, ITK, LCP1, PTPRC, RAC2, RASSF5, RGS1, S100A8, SELL, SELPLG, TAC1, VAV1 | 41 |
| Immune Cell             | adhesion    | adhesion of mononuclea                  | 1,46E-22 | BTK, CCL2, CCL3, CCL4, CCL5, CCL11, CCL19, CCL20, CCL21, CD2, CD19, CD28, CD48, CXCL9, CXCL11, CXCR3, FYB, ICAM2, ICOS, IL1B, ITGAL, ITGAX, ITGB2,                                                                                                                  | 31 |

|                         |                 |                                             |          |                                                                                                                                                                                                                                             |    |
|-------------------------|-----------------|---------------------------------------------|----------|---------------------------------------------------------------------------------------------------------------------------------------------------------------------------------------------------------------------------------------------|----|
| Trafficking             |                 | r leukocytes                                |          | ITK, LCP1, RASSF5, RGS1, SELL, SELPLG, TAC1, VAV1                                                                                                                                                                                           |    |
| Immune Cell Trafficking | adhesion        | adhesion of lymphocytes                     | 5,86E-20 | BTK, CCL2, CCL3, CCL4, CCL11, CCL19, CCL20, CCL21, CD2, CD19, CD28, CD48, CXCL9, CXCL11, CXCR3, FYB, ICAM2, ICOS, ITGAL, ITGB2, ITK, RASSF5, RGS1, SELL, SELPLG, TAC1                                                                       | 26 |
| Immune Cell Trafficking | adhesion        | adhesion of T lymphocytes                   | 9,88E-17 | CCL3, CCL4, CCL11, CCL19, CCL20, CCL21, CD2, CD48, CXCL9, CXCL11, CXCR3, FYB, ICAM2, ICOS, ITGAL, ITGB2, ITK, RASSF5, SELL, SELPLG, TAC1                                                                                                    | 21 |
| Immune Cell Trafficking | adhesion        | adhesion of granulocytes                    | 1,87E-11 | C3, CCL11, CORO1A, CSF3R, CXCL2, FGR, HCK, IL1B, ITGAL, ITGAX, ITGB2, LCP1, S100A8, SELL, SELPLG, VAV1                                                                                                                                      | 16 |
| Immune Cell Trafficking | adhesion        | adhesion of neutrophils                     | 2,10E-09 | CORO1A, CSF3R, CXCL2, IL1B, ITGAL, ITGAX, ITGB2, LCP1, S100A8, SELL, SELPLG, VAV1                                                                                                                                                           | 12 |
| Immune Cell Trafficking | accumulation    | accumulation of leukocytes                  | 2,07E-22 | ALOX5, CCL2, CCL5, CCL11, CCL21, CCR2, CCR5, CCR7, CD28, CD86, CD1D, CXCL2, CXCL9, CXCL10, CXCR3, CYBB, DEF6, GRN, ICOS, IL10RA, IL1B, IL1RN, IL2RG, ITGAL, ITGAX, ITGB2, PTGDS, RUNX3, S100A8, SELL, SELPLG, SH2D2A, SLPI, TIMP1, TNFRSF25 | 35 |
| Immune Cell Trafficking | accumulation    | accumulation of mononuclear leukocytes      | 1,31E-16 | CCL5, CCL21, CCR5, CCR7, CD28, CD86, CD1D, CXCL2, CXCL10, CXCR3, DEF6, ICOS, IL10RA, IL2RG, ITGAL, ITGB2, PTGDS, RUNX3, SELL, SH2D2A, TNFRSF25                                                                                              | 21 |
| Immune Cell Trafficking | accumulation    | accumulation of lymphocytes                 | 3,50E-15 | CCL5, CCL21, CCR5, CCR7, CD28, CD86, CD1D, CXCL10, CXCR3, DEF6, ICOS, IL10RA, IL2RG, ITGAL, ITGB2, RUNX3, SELL, SH2D2A, TNFRSF25                                                                                                            | 19 |
| Immune Cell Trafficking | accumulation    | accumulation of T lymphocytes               | 5,82E-14 | CCL5, CCL21, CCR5, CCR7, CD28, CD86, CXCL10, CXCR3, DEF6, ICOS, IL10RA, IL2RG, ITGAL, RUNX3, SH2D2A, TNFRSF25                                                                                                                               | 16 |
| Immune Cell Trafficking | accumulation    | accumulation of phagocytes                  | 6,34E-11 | CCL2, CCL5, CCL11, CCR2, CD28, CXCL2, CXCL10, GRN, IL1B, IL1RN, ITGAX, ITGB2, S100A8, SELPLG, SLPI, TIMP1                                                                                                                                   | 16 |
| Immune Cell Trafficking | accumulation    | accumulation of granulocytes                | 2,59E-10 | ALOX5, CCL2, CCL5, CCL11, CXCL2, CXCL9, CXCL10, GRN, IL1B, IL1RN, ITGB2, PTGDS, S100A8, SELPLG, SLPI                                                                                                                                        | 15 |
| Immune Cell Trafficking | transmigration  | transmigration of leukocytes                | 1,58E-16 | CCL2, CCL3, CCL4, CCL5, CCL11, CCL19, CCR7, CD28, CD86, CTSS, CXCL2, CXCL9, CXCL10, CXCL11, FPR1, ICAM2, IL1B, ITGAL, ITGAX, ITGB2, LSP1, SLPI                                                                                              | 22 |
| Immune Cell Trafficking | transmigration  | transmigration of mononuclear leukocytes    | 7,71E-10 | CCL2, CCL3, CCL4, CCL5, CCR7, CD28, CD86, CTSS, CXCL11, ITGAL, ITGAX, ITGB2                                                                                                                                                                 | 12 |
| Immune Cell Trafficking | transmigration  | transmigration of granulocytes              | 2,32E-09 | CCL11, CXCL2, CXCL9, CXCL10, FPR1, ICAM2, ITGAL, ITGAX, ITGB2, LSP1, SLPI                                                                                                                                                                   | 11 |
| Immune Cell Trafficking | transmigration  | transmigration of dendritic cells           | 1,11E-08 | CCL3, CCL4, CCL5, CCL19, CCR7, ICAM2, IL1B                                                                                                                                                                                                  | 7  |
| Immune Cell Trafficking | chemoattraction | chemoattraction of leukocytes               | 2,34E-16 | C3, CCL2, CCL3, CCL4, CCL5, CCL18, CCL19, CCL20, CXCL1, CXCL9, CXCL10, CXCL13, CXCR3, IL16, IL12RB1, XCL1                                                                                                                                   | 16 |
| Immune Cell Trafficking | chemoattraction | chemoattraction of lymphocytes              | 3,48E-12 | CCL2, CCL3, CCL4, CCL5, CCL18, CXCL9, CXCL10, CXCL13, CXCR3, IL16                                                                                                                                                                           | 10 |
| Immune Cell Trafficking | chemoattraction | chemoattraction of antigen presenting cells | 8,00E-11 | CCL2, CCL3, CCL4, CCL5, CCL19, CCL20, CXCL9, CXCR3, IL12RB1                                                                                                                                                                                 | 9  |
| Immune Cell Trafficking | chemoattraction | chemoattraction of macrophages              | 1,29E-10 | CCL2, CCL3, CCL4, CCL5, CXCL9, CXCR3, IL12RB1                                                                                                                                                                                               | 7  |

|                         |                       |                                                 |          |                                                                                                                                                                                                                                                                                                                                                                                                                                                                                                                                                                                                                                                                                                                                                                                                                                                |     |
|-------------------------|-----------------------|-------------------------------------------------|----------|------------------------------------------------------------------------------------------------------------------------------------------------------------------------------------------------------------------------------------------------------------------------------------------------------------------------------------------------------------------------------------------------------------------------------------------------------------------------------------------------------------------------------------------------------------------------------------------------------------------------------------------------------------------------------------------------------------------------------------------------------------------------------------------------------------------------------------------------|-----|
| Immune Cell Trafficking | chemoattraction       | chemoattraction of phagocytes                   | 4,55E-10 | CCL2, CCL3, CCL4, CCL5, CXCL1, CXCL9, CXCR3, IL12RB1, XCL1                                                                                                                                                                                                                                                                                                                                                                                                                                                                                                                                                                                                                                                                                                                                                                                     | 9   |
| Immune Cell Trafficking | infiltration          | infiltration by mononuclear leukocytes          | 7,26E-15 | C3, CCL2, CCL3, CCL4, CCL18, CCL19, CCL21, CCR2, CCR5, CCR7, CD86, CXCL10, DARC, IL16, IL1B, ITK, PRF1, SELPLG, TIMP1, UCP2, XCL1, ZC3H12A                                                                                                                                                                                                                                                                                                                                                                                                                                                                                                                                                                                                                                                                                                     | 22  |
| Immune Cell Trafficking | infiltration          | infiltration of leukocytes                      | 3,62E-14 | C3, CCL2, CCL3, CCL4, CCL18, CCL19, CCL21, CCR2, CCR5, CCR7, CD86, CSF1R, CXCL10, DARC, FGB, IL16, IL1B, IL1RN, ITK, PRF1, SELPLG, STAT1, TIMP1, TNFRSF1B, UCP2, XCL1, ZC3H12A                                                                                                                                                                                                                                                                                                                                                                                                                                                                                                                                                                                                                                                                 | 27  |
| Immune Cell Trafficking | infiltration          | infiltration by lymphocytes                     | 1,51E-13 | C3, CCL3, CCL18, CCL19, CCL21, CCR2, CCR5, CCR7, CD86, CXCL10, DARC, IL16, IL1B, ITK, PRF1, SELPLG, TIMP1, UCP2, XCL1, ZC3H12A                                                                                                                                                                                                                                                                                                                                                                                                                                                                                                                                                                                                                                                                                                                 | 20  |
| Immune Cell Trafficking | infiltration          | infiltration by T lymphocytes                   | 2,03E-13 | C3, CCL3, CCL18, CCL19, CCL21, CCR2, CCR5, CD86, CXCL10, DARC, IL16, IL1B, ITK, PRF1, SELPLG, XCL1                                                                                                                                                                                                                                                                                                                                                                                                                                                                                                                                                                                                                                                                                                                                             | 16  |
| Immune Cell Trafficking | infiltration          | infiltration by neutrophils                     | 8,14E-12 | C2, C3, CASP1, CCL3, CCL4, CCL21, CCR2, CXCL2, CXCL10, FCER1G, IL1B, IL1RN, ITGAL, ITGB2, NCF1, RAC2, SELL, TNFRSF1B, XCL1                                                                                                                                                                                                                                                                                                                                                                                                                                                                                                                                                                                                                                                                                                                     | 19  |
| Immune Cell Trafficking | infiltration          | infiltration by eosinophils                     | 6,64E-09 | CCL3, CCL5, CCL11, CCL21, CD2, CD48, IL27RA, IL2RB, ITK, PLA2G7, RUNX3                                                                                                                                                                                                                                                                                                                                                                                                                                                                                                                                                                                                                                                                                                                                                                         | 11  |
| Immune Cell Trafficking | mobilization          | mobilization of leukocytes                      | 1,22E-11 | CCL2, CCL3, CCL4, CCL11, CCL20, CCR5, CXCL2, CXCL10, CXCR3, FPR1, IL1B, ITGB2                                                                                                                                                                                                                                                                                                                                                                                                                                                                                                                                                                                                                                                                                                                                                                  | 12  |
| Immune Cell Trafficking | mobilization          | mobilization of myeloid cells                   | 2,07E-08 | CCL2, CCL3, CCL4, CCL11, CXCL2, CXCL10, FPR1, IL1B                                                                                                                                                                                                                                                                                                                                                                                                                                                                                                                                                                                                                                                                                                                                                                                             | 8   |
| Immune Cell Trafficking | trafficking           | trafficking of leukocytes                       | 3,81E-11 | CCL3, CCL4, CCL5, CCL19, CCL20, CCR2, CCR5, CXCL10, CXCL13, ITGB2, TNFRSF1B                                                                                                                                                                                                                                                                                                                                                                                                                                                                                                                                                                                                                                                                                                                                                                    | 11  |
| Cellular Development    | developmental process | developmental process of leukocytes             | 3,33E-53 | ADA, BCL11B, BCL2A1, BTK, BTLA, C3, CASP1, CCL2, CCL3, CCL4, CCL5, CCL11, CCL19, CCL21, CCR2, CCR5, CCR7, CD2, CD4, CD6, CD14, CD19, CD22, CD27, CD28, CD69, CD86, CD247, CD1D, CD300A, CD3D, CD3E, CD3G, CD79A, CD8A, CIITA, CLEC10A, CR2, CSF1R, CSF2RB, CSF3R, CXCL10, CXCL11, DEF6, DOCK2, EOMES, FCER1G, GZMA, GZMB, HLA-DOA, HLA-DQA1, HLA-DQB1, ICOS, IDO1, IGHG1, IGHM, IKZF1, IL10RA, IL12RB1, IL1B, IL1RN, IL27RA, IL2RB, IL2RG, IL7R, IRF1, IRF4, IRF7, ITGAL, ITGB2, ITK, JAK3, LAX1, LCK, LCP2, LTB, MAP4K1, MYB (includes EG:4602), NCAPH2, POU2AF1, PRF1, PSMB9, PTPN6, PTPN22, PTPRC, RAC2, RARRES3, RASSF5, RGS10, RHOH, RUNX3, SH2D1A, SH2D2A, SIT1, SLAMF1, SPIB, STAT1, STAT4, TCL1A, TIMP1, TLR7, TLR8 (includes EG:51311), TNFRSF25, TNFRSF1B, TNFSF13B, TRAT1, TYROBP, VAV1, WAS, XCL1, ZAP70                           | 111 |
| Cellular Development    | developmental process | developmental process of blood cells            | 9,88E-52 | ADA, BCL11B, BCL2A1, BTK, BTLA, C3, CASP1, CCL2, CCL3, CCL4, CCL5, CCL11, CCL19, CCL21, CCR2, CCR5, CCR7, CD2, CD4, CD6, CD14, CD19, CD22, CD27, CD28, CD69, CD86, CD163, CD247, CD1D, CD300A, CD3D, CD3E, CD3G, CD79A, CD8A, CIITA, CLEC10A, CR2, CSF1R, CSF2RB, CSF3R, CXCL10, CXCL11, DEF6, DOCK2, EOMES, FCER1G, GZMA, GZMB, HCL1, HLA-DOA, HLA-DQA1, HLA-DQB1, ICAM2, ICOS, IDO1, IGHG1, IGHM, IKZF1, IL10RA, IL12RB1, IL1B, IL1RN, IL27RA, IL2RB, IL2RG, IL7R, IRF1, IRF4, IRF7, ITGAL, ITGB2, ITK, JAK3, LAX1, LCK, LCN2, LCP2, LTB, MAP4K1, MYB (includes EG:4602), NCAPH2, POU2AF1, PRF1, PSMB9, PTPN6, PTPN22, PTPRC, RAC2, RARRES3, RASSF5, RGS10, RHOH, RUNX3, SH2D1A, SH2D2A, SIT1, SLAMF1, SPIB, STAT1, STAT4, TCL1A, TIMP1, TLR7, TLR8 (includes EG:51311), TNFRSF25, TNFRSF1B, TNFSF13B, TRAT1, TYROBP, VAV1, WAS, XCL1, ZAP70 | 115 |
| Cellular Development    | developmental process | developmental process of mononuclear leukocytes | 3,25E-49 | ADA, BCL11B, BCL2A1, BTK, BTLA, C3, CASP1, CCL2, CCL3, CCL4, CCL5, CCL19, CCR5, CCR7, CD2, CD4, CD6, CD14, CD19, CD22, CD27, CD28, CD69, CD86, CD247, CD1D, CD3D, CD3E, CD3G, CD79A, CD8A, CIITA, CLEC10A, CR2, CSF1R, CSF3R, CXCL11, DEF6, DOCK2, EOMES, FCER1G, GZMA, GZMB, HLA-DOA, HLA-DQA1, HLA-DQB1, ICOS, IDO1, IGHG1, IGHM, IKZF1, IL10RA, IL12RB1, IL1B, IL1RN, IL27RA, IL2RB, IL2RG, IL7R, IRF1, IRF4, IRF7, ITGAL, ITGB2, ITK, JAK3, LAX1, LCK, LCP2, LTB, MAP4K1, MYB (includes EG:4602), NCAPH2, POU2AF1, PRF1, PSMB9, PTPN6, PTPN22, PTPRC, RAC2, RASSF5, RHOH, RUNX3, SH2D1A, SH2D2A, SIT1, SLAMF1, SPIB, STAT1, STAT4, TCL1A, TLR7, TNFRSF25, TNFRSF1B, TNFSF13B, TRAT1, VAV1, WAS, XCL1, ZAP70                                                                                                                                | 100 |

|                      |                       |                                                   |          |                                                                                                                                                                                                                                                                                                                                                                                                                                                                                                                                                                                                                                                                                      |    |
|----------------------|-----------------------|---------------------------------------------------|----------|--------------------------------------------------------------------------------------------------------------------------------------------------------------------------------------------------------------------------------------------------------------------------------------------------------------------------------------------------------------------------------------------------------------------------------------------------------------------------------------------------------------------------------------------------------------------------------------------------------------------------------------------------------------------------------------|----|
| Cellular Development | developmental process | developmental process of lymphocytes              | 2,73E-47 | ADA, BCL11B, BCL2A1, BTK, BTLA, C3, CASP1, CCL3, CCL4, CCL5, CCL19, CCR5, CCR7, CD2, CD4, CD6, CD14, CD19, CD22, CD27, CD28, CD69, CD86, CD247, CD1D, CD3D, CD3E, CD3G, CD79A, CD8A, CIITA, CLEC10A, CR2, CSF3R, DEF6, DOCK2, EOMES, FCER1G, GZMA, GZMB, HLA-DOA, HLA-DQA1, HLA-DQB1, ICOS, IDO1, IGHG1, IGHM, IKZF1, IL10RA, IL12RB1, IL1B, IL1RN, IL27RA, IL2RB, IL2RG, IL7R, IRF1, IRF4, ITGAL, ITGB2, ITK, JAK3, LAX1, LCK, LCP2, LTB, MAP4K1, MYB (includes EG:4602), NCAPH2, POU2AF1, PRF1, PSMB9, PTPN6, PTPN22, PTPRC, RAC2, RASSF5, RHOH, RUNX3, SH2D1A, SH2D2A, SIT1, SLAMF1, SPIB, STAT1, STAT4, TCL1A, TLR7, TNFRSF25, TNFRSF1B, TNFSF13B, TRAT1, VAV1, WAS, XCL1, ZAP70 | 96 |
| Cellular Development | developmental process | developmental process of T lymphocytes            | 1,62E-43 | ADA, BCL11B, BCL2A1, BTLA, C3, CASP1, CCL3, CCL4, CCL5, CCL19, CCR5, CCR7, CD2, CD4, CD6, CD27, CD28, CD86, CD247, CD1D, CD3D, CD3E, CD3G, CD8A, CIITA, CLEC10A, DEF6, DOCK2, EOMES, FCER1G, GZMA, GZMB, HLA-DOA, HLA-DQA1, HLA-DQB1, ICOS, IDO1, IGHG1, IGHM, IKZF1, IL10RA, IL12RB1, IL1B, IL1RN, IL27RA, IL2RB, IL2RG, IL7R, IRF1, IRF4, ITGAL, ITGB2, ITK, JAK3, LAX1, LCK, LCP2, LTB, MAP4K1, MYB (includes EG:4602), NCAPH2, PRF1, PSMB9, PTPN6, PTPN22, PTPRC, RAC2, RASSF5, RHOH, RUNX3, SH2D1A, SH2D2A, SIT1, SLAMF1, SPIB, STAT1, STAT4, TCL1A, TNFRSF25, TNFRSF1B, TNFSF13B, TRAT1, VAV1, WAS, XCL1, ZAP70                                                                | 86 |
| Cellular Development | developmental process | developmental process of thymocytes               | 1,17E-15 | CD2, CD4, CD28, CD86, CD247, CD3D, CD3E, CD3G, IKZF1, IL2RB, IL2RG, IL7R, IRF1, LAX1, LCK, LCP2, MYB (includes EG:4602), PTPRC, SIT1, SPIB, TRAT1, WAS, ZAP70                                                                                                                                                                                                                                                                                                                                                                                                                                                                                                                        | 23 |
| Cellular Development | developmental process | developmental process of B lymphocytes            | 6,46E-12 | ADA, BTK, CD14, CD19, CD22, CD27, CD69, CD79A, CR2, ICOS, IGHM, IKZF1, IL1B, IL2RB, IL2RG, IL7R, IRF4, JAK3, MYB (includes EG:4602), POU2AF1, PTPN6, PTPRC, SPIB, TLR7, TNFSF13B, VAV1                                                                                                                                                                                                                                                                                                                                                                                                                                                                                               | 26 |
| Cellular Development | developmental process | developmental process of helper T lymphocytes     | 2,91E-11 | CASP1, CCL3, CD28, CD86, ICOS, IGHG1, IL12RB1, IL1B, IL27RA, IL2RB, IRF1, ITGAL, ITGB2, ITK, JAK3, LCP2, SH2D1A, STAT1, STAT4, TNFSF13B, VAV1                                                                                                                                                                                                                                                                                                                                                                                                                                                                                                                                        | 21 |
| Cellular Development | developmental process | developmental process of antigen presenting cells | 5,50E-10 | CCL5, CCL19, CCL21, CCR2, CSF1R, CSF2RB, IKZF1, IL1B, IL1RN, IRF1, IRF4, IRF7, LTB, MYB (includes EG:4602), RARRES3, RGS10, RUNX3, SPIB, STAT1, TIMP1, TLR7, TLR8 (includes EG:51311), TYROBP                                                                                                                                                                                                                                                                                                                                                                                                                                                                                        | 23 |
| Cellular Development | developmental process | developmental process of Th1 cells                | 5,35E-09 | CASP1, CCL3, CD86, ICOS, IL12RB1, IL1B, IL27RA, IRF1, ITGAL, ITGB2, JAK3, LCP2, STAT1, STAT4                                                                                                                                                                                                                                                                                                                                                                                                                                                                                                                                                                                         | 14 |
| Cellular Development | developmental process | developmental process of Th2 cells                | 7,62E-09 | CD28, CD86, ICOS, IGHG1, IL12RB1, IRF1, ITK, JAK3, LCP2, SH2D1A, STAT1, STAT4, VAV1                                                                                                                                                                                                                                                                                                                                                                                                                                                                                                                                                                                                  | 13 |
| Cellular Development | developmental process | developmental process of dendritic cells          | 2,03E-08 | CCL5, CCL19, CCL21, CCR2, CSF1R, IKZF1, IL1B, IRF1, IRF4, LTB, RARRES3, RUNX3, SPIB, STAT1, TLR7, TLR8 (includes EG:51311), TYROBP                                                                                                                                                                                                                                                                                                                                                                                                                                                                                                                                                   | 17 |
| Cellular Development | development           | development of mononuclear leukocytes             | 7,26E-47 | ADA, BCL11B, BCL2A1, BTK, CASP1, CCL3, CCL4, CCL5, CCL19, CCR5, CCR7, CD2, CD4, CD6, CD19, CD27, CD28, CD69, CD86, CD247, CD1D, CD3D, CD3E, CD3G, CD8A, CIITA, CLEC10A, CR2, CSF3R, CXCL11, DEF6, DOCK2, EOMES, FCER1G, GZMA, GZMB, HLA-DOA, HLA-DQA1, HLA-DQB1, ICOS, IDO1, IGHG1, IGHM, IKZF1, IL10RA, IL12RB1, IL1B, IL1RN, IL27RA, IL2RB, IL2RG, IL7R, IRF1, IRF4, ITGAL, ITGB2, ITK, JAK3, LAX1, LCK, LCP2, LTB, MAP4K1, MYB (includes EG:4602), NCAPH2, POU2AF1, PRF1, PSMB9, PTPN6, PTPN22, PTPRC, RAC2, RASSF5, RHOH, RUNX3, SH2D1A, SH2D2A, SIT1, SLAMF1, SPIB, STAT1, STAT4, TCL1A, TNFRSF25, TNFRSF1B, TNFSF13B, TRAT1, VAV1, WAS, XCL1, ZAP70                            | 91 |
| Cellular Development | development           | development of leukocytes                         | 8,10E-47 | ADA, BCL11B, BCL2A1, BTK, CASP1, CCL3, CCL4, CCL5, CCL19, CCR5, CCR7, CD2, CD4, CD6, CD19, CD27, CD28, CD69, CD86, CD247, CD1D, CD3D, CD3E, CD3G, CD8A, CIITA, CLEC10A, CR2, CSF1R, CSF3R, CXCL11, DEF6, DOCK2, EOMES, FCER1G, GZMA, GZMB, HLA-DOA, HLA-DQA1, HLA-DQB1, ICOS, IDO1, IGHG1, IGHM, IKZF1, IL10RA, IL12RB1, IL1B, IL1RN, IL27RA, IL2RB, IL2RG, IL7R, IRF1, IRF4, ITGAL, ITGB2, ITK, JAK3, LAX1, LCK, LCP2, LTB, MAP4K1, MYB (includes EG:4602), NCAPH2, POU2AF1, PRF1, PSMB9, PTPN6, PTPN22, PTPRC, RAC2, RASSF5, RHOH, RUNX3, SH2D1A, SH2D2A, SIT1, SLAMF1, SPIB, STAT1, STAT4, TCL1A, TNFRSF25, TNFRSF1B, TNFSF13B,                                                   | 92 |

|                      |                 |                                           |          |                                                                                                                                                                                                                                                                                                                                                                                                                                                                                                                                                                                                                                                                                                                                                                                |     |
|----------------------|-----------------|-------------------------------------------|----------|--------------------------------------------------------------------------------------------------------------------------------------------------------------------------------------------------------------------------------------------------------------------------------------------------------------------------------------------------------------------------------------------------------------------------------------------------------------------------------------------------------------------------------------------------------------------------------------------------------------------------------------------------------------------------------------------------------------------------------------------------------------------------------|-----|
|                      |                 |                                           |          | TRAT1, VAV1, WAS, XCL1, ZAP70                                                                                                                                                                                                                                                                                                                                                                                                                                                                                                                                                                                                                                                                                                                                                  |     |
| Cellular Development | development     | development of lymphocytes                | 3,82E-46 | ADA, BCL11B, BCL2A1, BTK, CASP1, CCL3, CCL4, CCL5, CCL19, CCR5, CCR7, CD2, CD4, CD6, CD19, CD27, CD28, CD69, CD86, CD247, CD1D, CD3D, CD3E, CD3G, CD8A, CIITA, CLEC10A, CR2, CSF3R, DEF6, DOCK2, EOMES, FCER1G, GZMA, GZMB, HLA-DOA, HLA-DQA1, HLA-DQB1, ICOS, IDO1, IGHG1, IGHM, IKZF1, IL10RA, IL12RB1, IL1B, IL1RN, IL27RA, IL2RB, IL2RG, IL7R, IRF1, IRF4, ITGAL, ITGB2, ITK, JAK3, LAX1, LCK, LCP2, LTB, MAP4K1, MYB (includes EG:4602), NCAPH2, POU2AF1, PRF1, PSMB9, PTPN6, PTPN22, PTPRC, RAC2, RASSF5, RHOH, RUNX3, SH2D1A, SH2D2A, SIT1, SLAMF1, SPIB, STAT1, STAT4, TCL1A, TNFRSF25, TNFRSF1B, TNFSF13B, TRAT1, VAV1, WAS, XCL1, ZAP70                                                                                                                              | 90  |
| Cellular Development | development     | T cell development                        | 3,75E-43 | ADA, BCL11B, BCL2A1, CASP1, CCL3, CCL4, CCL5, CCL19, CCR5, CCR7, CD2, CD4, CD6, CD27, CD28, CD86, CD247, CD1D, CD3D, CD3E, CD3G, CD8A, CIITA, CLEC10A, DEF6, DOCK2, EOMES, FCER1G, GZMA, GZMB, HLA-DOA, HLA-DQA1, HLA-DQB1, ICOS, IDO1, IGHG1, IGHM, IKZF1, IL10RA, IL12RB1, IL1B, IL1RN, IL27RA, IL2RB, IL2RG, IL7R, IRF1, IRF4, ITGAL, ITGB2, ITK, JAK3, LAX1, LCK, LCP2, LTB, MAP4K1, MYB (includes EG:4602), NCAPH2, PRF1, PSMB9, PTPN6, PTPN22, PTPRC, RAC2, RASSF5, RHOH, RUNX3, SH2D1A, SH2D2A, SIT1, SLAMF1, SPIB, STAT1, STAT4, TCL1A, TNFRSF25, TNFRSF1B, TNFSF13B, TRAT1, VAV1, WAS, XCL1, ZAP70                                                                                                                                                                    | 84  |
| Cellular Development | development     | development of cells                      | 7,59E-29 | ADA, BCL11B, BCL2A1, BTK, CASP1, CCL2, CCL3, CCL4, CCL5, CCL11, CCL19, CCR2, CCR5, CCR7, CD2, CD4, CD6, CD19, CD27, CD28, CD69, CD86, CD247, CD1D, CD3D, CD3E, CD3G, CD8A, CIITA, CLEC10A, CORO1A, CR2, CSF1R, CSF3R, CXCL2, CXCL11, DEF6, DENND2D, DGKA, DOCK2, EOMES, FCER1G, FGR, GZMA, GZMB, HCK, HLA-DOA, HLA-DQA1, HLA-DQB1, ICOS, IDO1, IGHG1, IGHM, IKZF1, IL10RA, IL12RB1, IL1B, IL1RN, IL27RA, IL2RB, IL2RG, IL7R, IRF1, IRF4, ITGAL, ITGB2, ITK, JAK3, KLRK1, LAX1, LCK, LCN2, LCP2, LTB, MAP4K1, MYB (includes EG:4602), NCAPH2, NCF1C, PARVG, POU2AF1, PRF1, PSMB9, PTPN6, PTPN22, PTPRC, RAC2, RASSF5, RHOH, RUNX3, SELL, SERPINA3, SH2D1A, SH2D2A, SIT1, SLAMF1, SPIB, STAT1, STAT4, TCL1A, TNFRSF25, TNFRSF1B, TNFSF13B, TRAT1, TYROBP, VAV1, WAS, XCL1, ZAP70 | 108 |
| Cellular Development | development     | development of thymocytes                 | 3,15E-11 | CD3D, CD3E, CD3G, IL2RB, IL2RG, IL7R, IRF1, LAX1, LCP2, MYB (includes EG:4602), PTPRC, SIT1, SPIB, TRAT1, ZAP70                                                                                                                                                                                                                                                                                                                                                                                                                                                                                                                                                                                                                                                                | 15  |
| Cellular Development | development     | development of helper T lymphocytes       | 1,08E-08 | CASP1, CD28, CD86, ICOS, IL12RB1, IL1B, IRF1, ITGB2, ITK, STAT1, STAT4                                                                                                                                                                                                                                                                                                                                                                                                                                                                                                                                                                                                                                                                                                         | 11  |
| Cellular Development | development     | development of B lymphocytes              | 1,15E-07 | ADA, BTK, CD19, CD69, CR2, IGHM, IL2RG, IL7R, JAK3, MYB (includes EG:4602), POU2AF1, TNFSF13B, VAV1                                                                                                                                                                                                                                                                                                                                                                                                                                                                                                                                                                                                                                                                            | 13  |
| Cellular Development | differentiation | differentiation of leukocytes             | 2,83E-33 | ADA, BCL2A1, CCL2, CCL3, CCL11, CCL19, CD2, CD4, CD14, CD27, CD28, CD86, CD1D, CD300A, CD3D, CD3E, CD79A, CD8A, CR2, CSF1R, CSF2RB, CSF3R, DEF6, DOCK2, HLA-DOA, HLA-DQA1, ICOS, IGHG1, IGHM, IKZF1, IL12RB1, IL1B, IL1RN, IL27RA, IL2RB, IL2RG, IL7R, IRF1, IRF4, IRF7, ITGAL, ITGB2, ITK, JAK3, LCK, LCP2, MYB (includes EG:4602), NCAPH2, POU2AF1, PTPN6, PTPN22, PTPRC, RASSF5, RGS10, RHOH, SH2D1A, SIT1, SLAMF1, SPIB, STAT1, STAT4, TIMP1, TLR7, TNFRSF25, TNFSF13B, TRAT1, VAV1, WAS, ZAP70                                                                                                                                                                                                                                                                            | 69  |
| Cellular Development | differentiation | differentiation of mononuclear leukocytes | 4,25E-33 | ADA, BCL2A1, CCL2, CCL3, CCL19, CD2, CD4, CD14, CD27, CD28, CD86, CD1D, CD3D, CD3E, CD79A, CD8A, CR2, CSF1R, DEF6, DOCK2, HLA-DOA, HLA-DQA1, ICOS, IGHG1, IGHM, IKZF1, IL12RB1, IL1B, IL1RN, IL27RA, IL2RB, IL2RG, IL7R, IRF1, IRF4, IRF7, ITGAL, ITGB2, ITK, JAK3, LCK, LCP2, MYB (includes EG:4602), NCAPH2, POU2AF1, PTPN6, PTPN22, PTPRC, RASSF5, RHOH, SH2D1A, SIT1, SLAMF1, SPIB, STAT1, STAT4, TLR7, TNFRSF25, TNFSF13B, TRAT1, VAV1, WAS, ZAP70                                                                                                                                                                                                                                                                                                                        | 63  |
| Cellular Development | differentiation | differentiation of blood cells            | 1,05E-32 | ADA, BCL2A1, CCL2, CCL3, CCL11, CCL19, CD2, CD4, CD14, CD27, CD28, CD86, CD1D, CD300A, CD3D, CD3E, CD79A, CD8A, CR2, CSF1R, CSF2RB, CSF3R, DEF6, DOCK2, HCLS1, HLA-DOA, HLA-DQA1, ICAM2, ICOS, IGHG1, IGHM, IKZF1, IL12RB1, IL1B, IL1RN, IL27RA, IL2RB, IL2RG, IL7R, IRF1, IRF4, IRF7, ITGAL, ITGB2, ITK, JAK3, LCK, LCN2, LCP2, MAP4K1, MYB (includes EG:4602), NCAPH2, POU2AF1, PTPN6, PTPN22, PTPRC, RASSF5, RGS10, RHOH, SH2D1A, SIT1, SLAMF1, SPIB, STAT1, STAT4, TIMP1, TLR7, TNFRSF25, TNFSF13B, TRAT1, VAV1, WAS, ZAP70                                                                                                                                                                                                                                                | 73  |
| Cellular Development | differentiation | differentiation of                        | 1,58E-32 | ADA, BCL2A1, CCL3, CCL19, CD2, CD4, CD14, CD27, CD28, CD86, CD1D, CD3D, CD3E, CD79A, CD8A, CR2, DEF6, DOCK2, HLA-DOA, HLA-DQA1, ICOS,                                                                                                                                                                                                                                                                                                                                                                                                                                                                                                                                                                                                                                          | 60  |

|                      |                 |                                         |          |                                                                                                                                                                                                                                                                                                                                                                                                                                                                                                                                                                                                                                                                                                         |    |
|----------------------|-----------------|-----------------------------------------|----------|---------------------------------------------------------------------------------------------------------------------------------------------------------------------------------------------------------------------------------------------------------------------------------------------------------------------------------------------------------------------------------------------------------------------------------------------------------------------------------------------------------------------------------------------------------------------------------------------------------------------------------------------------------------------------------------------------------|----|
| ent                  |                 | lymphocytes                             |          | IGHG1, IGHM, IKZF1, IL12RB1, IL1B, IL1RN, IL27RA, IL2RB, IL2RG, IL7R, IRF1, IRF4, ITGAL, ITGB2, ITK, JAK3, LCK, LCP2, MYB (includes EG:4602), NCAPH2, POU2AF1, PTPN6, PTPN22, PTPRC, RASSF5, RHOH, SH2D1A, SIT1, SLAMF1, SPIB, STAT1, STAT4, TLR7, TNFRSF25, TNFSF13B, TRAT1, VAV1, WAS, ZAP70                                                                                                                                                                                                                                                                                                                                                                                                          |    |
| Cellular Development | differentiation | differentiation of T lymphocytes        | 3,22E-24 | ADA, BCL2A1, CCL3, CCL19, CD2, CD4, CD28, CD86, CD1D, CD3E, CD8A, DEF6, HLA-DOA, HLA-DQA1, ICOS, IGHG1, IKZF1, IL12RB1, IL1B, IL1RN, IL27RA, IL2RB, IL2RG, IL7R, IRF1, IRF4, ITGAL, ITGB2, ITK, JAK3, LCK, LCP2, MYB (includes EG:4602), NCAPH2, PTPN22, PTPRC, RASSF5, SH2D1A, SLAMF1, STAT1, STAT4, TNFSF13B, VAV1, WAS, ZAP70                                                                                                                                                                                                                                                                                                                                                                        | 45 |
| Cellular Development | differentiation | differentiation of cells                | 4,99E-18 | ADA, ALOX5, ASCL2, BCL2A1, BTK, CCL2, CCL3, CCL5, CCL11, CCL19, CD2, CD4, CD14, CD27, CD28, CD86, CD1D, CD300A, CD300LF, CD3D, CD3E, CD79A, CD8A, CR2, CSF1R, CSF2RB, CSF3R, CSTA, CXCL10, DEF6, DOCK2, EOMES, FCER1G, GABBR1, GRN, GZMB, HCLS1, HLA-DOA, HLA-DQA1, ICAM2, ICOS, IGHG1, IGHM, IKZF1, IL10RA, IL12RB1, IL1B, IL1RN, IL27RA, IL2RB, IL2RG, IL7R, IRF1, IRF4, IRF7, ITGAL, ITGB2, ITK, JAK3, LCK, LCN2, LCP2, LRG1, MAP4K1, MYB (includes EG:4602), NCAPH2, PLAC8, POU2AF1, PRKCB, PTGDS, PTPN6, PTPN22, PTPRC, RARRES3, RASSF5, RGS10, RHOH, RUNX3, S100A8, SH2D1A, SIT1, SLAMF1, SPIB, ST8SIA4, STAT1, STAT4, TIMP1, TLR7, TNFRSF25, TNFRSF1B, TNFSF13B, TRAT1, TYROBP, VAV1, WAS, ZAP70 | 96 |
| Cellular Development | differentiation | differentiation of helper T lymphocytes | 9,77E-11 | CCL3, CD28, CD86, ICOS, IGHG1, IL12RB1, IL1B, IL27RA, IL2RB, IRF1, ITGAL, ITGB2, ITK, JAK3, SH2D1A, STAT1, STAT4, TNFSF13B, VAV1                                                                                                                                                                                                                                                                                                                                                                                                                                                                                                                                                                        | 19 |
| Cellular Development | differentiation | differentiation of B lymphocytes        | 2,03E-08 | CD14, CD27, CD79A, CR2, ICOS, IGHM, IKZF1, IL2RB, IL2RG, IL7R, IRF4, POU2AF1, PTPN6, PTPRC, SPIB, TLR7, TNFSF13B                                                                                                                                                                                                                                                                                                                                                                                                                                                                                                                                                                                        | 17 |
| Cellular Development | differentiation | differentiation of Th2 cells            | 6,00E-08 | CD28, CD86, ICOS, IGHG1, IRF1, ITK, JAK3, SH2D1A, STAT1, STAT4, VAV1                                                                                                                                                                                                                                                                                                                                                                                                                                                                                                                                                                                                                                    | 11 |
| Cellular Development | differentiation | differentiation of thymocytes           | 6,97E-08 | CD2, CD28, CD86, CD3E, IKZF1, IL2RG, LCP2, MYB (includes EG:4602), WAS, ZAP70                                                                                                                                                                                                                                                                                                                                                                                                                                                                                                                                                                                                                           | 10 |
| Cellular Development | cell death      | cell death of T lymphocytes             | 7,64E-22 | ADA, BCL2A1, CASP1, CCL3, CCL4, CCL5, CCL19, CCR5, CD2, CD4, CD27, CD28, CD247, CD3E, CIITA, CLEC10A, DEF6, EOMES, GZMA, GZMB, ICOS, IDO1, IGHM, IL1B, IL2RG, IL7R, ITK, JAK3, LCK, MAP4K1, PRF1, PTPRC, RAC2, SH2D2A, STAT1, TCL1A, TNFRSF25, TNFRSF1B, WAS, XCL1                                                                                                                                                                                                                                                                                                                                                                                                                                      | 40 |
| Cellular Development | growth          | growth of blood cells                   | 7,24E-21 | BTK, C3, CCL2, CCL3, CCL4, CCL11, CD2, CD4, CD14, CD22, CD27, CD28, CD86, CD163, CD3E, CR2, CSF1R, CXCL10, ICOS, IGHM, IL10RA, IL1B, IL2RB, IL7R, IRF1, JAK3, LCP2, MYB (includes EG:4602), PRF1, PTPN6, SLAMF1, STAT4, TCL1A, TNFRSF1B, TNFSF13B, ZAP70                                                                                                                                                                                                                                                                                                                                                                                                                                                | 36 |
| Cellular Development | growth          | growth of leukocytes                    | 2,39E-20 | BTK, C3, CCL2, CCL3, CCL11, CD2, CD4, CD14, CD22, CD27, CD28, CD86, CD3E, CR2, CSF1R, CXCL10, ICOS, IGHM, IL10RA, IL1B, IL2RB, IL7R, IRF1, JAK3, LCP2, PRF1, PTPN6, SLAMF1, STAT4, TCL1A, TNFRSF1B, TNFSF13B, ZAP70                                                                                                                                                                                                                                                                                                                                                                                                                                                                                     | 33 |
| Cellular Development | growth          | growth of lymphocytes                   | 1,61E-17 | BTK, C3, CD2, CD4, CD14, CD22, CD27, CD28, CD86, CD3E, CR2, ICOS, IGHM, IL1B, IL2RB, IL7R, IRF1, JAK3, LCP2, PRF1, PTPN6, SLAMF1, STAT4, TCL1A, TNFRSF1B, TNFSF13B, ZAP70                                                                                                                                                                                                                                                                                                                                                                                                                                                                                                                               | 27 |
| Cellular Development | growth          | growth of T lymphocytes                 | 4,47E-14 | C3, CD2, CD4, CD27, CD28, CD86, CD3E, ICOS, IGHM, IL1B, IRF1, JAK3, LCP2, PRF1, PTPN6, SLAMF1, STAT4, TCL1A, TNFRSF1B, TNFSF13B, ZAP70                                                                                                                                                                                                                                                                                                                                                                                                                                                                                                                                                                  | 21 |
| Cellular Development | apoptosis       | apoptosis of T lymphocytes              | 1,06E-17 | ADA, BCL2A1, CASP1, CCL3, CCL4, CCL5, CCR5, CD2, CD4, CD27, CD28, CD247, CD3E, CIITA, GZMA, GZMB, ICOS, IL1B, IL2RG, IL7R, ITK, JAK3, LCK, MAP4K1, PRF1, PTPRC, RAC2, STAT1, TCL1A, TNFRSF25, TNFRSF1B, WAS, XCL1                                                                                                                                                                                                                                                                                                                                                                                                                                                                                       | 33 |
| Cellular Development | selection       | selection of T lymphocytes              | 3,41E-16 | CD4, CD28, CD1D, CD3D, CD3E, DOCK2, HLA-DOA, ITK, PTPRC, RHOH, SIT1, TNFRSF25, TRAT1, VAV1, ZAP70                                                                                                                                                                                                                                                                                                                                                                                                                                                                                                                                                                                                       | 15 |
| Cellular Development | selection       | selection of thymocytes                 | 1,11E-08 | CD28, HLA-DOA, ITK, RHOH, SIT1, TNFRSF25, TRAT1                                                                                                                                                                                                                                                                                                                                                                                                                                                                                                                                                                                                                                                         | 7  |
| Cellular Development | expansion       | expansion of lymphocytes                | 8,89E-15 | BTK, C3, CD2, CD4, CD27, CD28, CD86, CD3E, CR2, ICOS, IGHM, IL1B, IL7R, IRF1, JAK3, LCP2, PRF1, SLAMF1, STAT4, TNFRSF1B, TNFSF13B, ZAP70                                                                                                                                                                                                                                                                                                                                                                                                                                                                                                                                                                | 22 |
| Cellular Development | expansion       | expansion                               | 9,46E-15 | BTK, C3, CD2, CD4, CD27, CD28, CD86, CD163, CD3E, CR2, ICOS, IGHM,                                                                                                                                                                                                                                                                                                                                                                                                                                                                                                                                                                                                                                      | 25 |

|                                   |                               |                                                |          |                                                                                                                                                                                                                                                                                                                                                                                                                                                                                                                                                                                                                                                                                        |    |
|-----------------------------------|-------------------------------|------------------------------------------------|----------|----------------------------------------------------------------------------------------------------------------------------------------------------------------------------------------------------------------------------------------------------------------------------------------------------------------------------------------------------------------------------------------------------------------------------------------------------------------------------------------------------------------------------------------------------------------------------------------------------------------------------------------------------------------------------------------|----|
| Development                       |                               | of blood cells                                 |          | IL10RA, IL1B, IL7R, IRF1, JAK3, LCP2, MYB (includes EG:4602), PRF1, SLAMF1, STAT4, TNFRSF1B, TNFSF13B, ZAP70                                                                                                                                                                                                                                                                                                                                                                                                                                                                                                                                                                           |    |
| Cellular Development              | expansion                     | expansion of leukocytes                        | 3,51E-14 | BTK, C3, CD2, CD4, CD27, CD28, CD86, CD3E, CR2, ICOS, IGHM, IL10RA, IL1B, IL7R, IRF1, JAK3, LCP2, PRF1, SLAMF1, STAT4, TNFRSF1B, TNFSF13B, ZAP70                                                                                                                                                                                                                                                                                                                                                                                                                                                                                                                                       | 23 |
| Cellular Development              | expansion                     | expansion of T lymphocytes                     | 4,12E-13 | C3, CD2, CD4, CD27, CD28, CD86, CD3E, ICOS, IGHM, IL1B, IRF1, JAK3, LCP2, PRF1, SLAMF1, STAT4, TNFRSF1B, TNFSF13B, ZAP70                                                                                                                                                                                                                                                                                                                                                                                                                                                                                                                                                               | 19 |
| Cellular Development              | shape change                  | shape change of leukocytes                     | 3,95E-14 | CCL2, CCL3, CCL5, CCL11, CCR2, CD19, CD247, CD3E, CORO1A, DOCK2, FGR, HCK, ICOS, ITGAL, ITGB2, SELL, WAS                                                                                                                                                                                                                                                                                                                                                                                                                                                                                                                                                                               | 17 |
| Cellular Development              | shape change                  | shape change of blood cells                    | 8,84E-14 | CCL2, CCL3, CCL5, CCL11, CCR2, CD19, CD247, CD3E, CORO1A, DOCK2, FGR, GZMB, HCK, ICOS, ITGAL, ITGB2, SELL, WAS                                                                                                                                                                                                                                                                                                                                                                                                                                                                                                                                                                         | 18 |
| Cellular Development              | shape change                  | shape change of granulocytes                   | 1,09E-10 | CCL2, CCL3, CCL5, CCL11, CCR2, CORO1A, FGR, HCK, ITGB2, SELL                                                                                                                                                                                                                                                                                                                                                                                                                                                                                                                                                                                                                           | 10 |
| Cellular Development              | shape change                  | shape change of normal cells                   | 1,16E-07 | CCL2, CCL3, CCL5, CCL11, CCR2, CD19, CD247, CD3E, CORO1A, DOCK2, FGR, GZMB, HCK, ICOS, ITGAL, ITGB2, SELL, SERPINA3, WAS                                                                                                                                                                                                                                                                                                                                                                                                                                                                                                                                                               | 19 |
| Cellular Development              | maturation                    | maturation of leukocytes                       | 3,50E-13 | BTK, BTLA, CCL5, CCL19, CCL21, CCR2, CD4, CD19, CD28, CD86, CD247, IGHM, IL1B, IRF1, ITK, LCK, PTPRC, RARRES3, RHOH, RUNX3, STAT1, TLR7, TLR8 (includes EG:51311), TNFSF13B, TYROBP, VAV1                                                                                                                                                                                                                                                                                                                                                                                                                                                                                              | 26 |
| Cellular Development              | maturation                    | maturation of cells                            | 5,33E-09 | BTK, BTLA, CCL5, CCL19, CCL21, CCR2, CD4, CD19, CD28, CD86, CD247, CD5L, IGHM, IL1B, IRF1, ITK, LCK, PRKCB, PTPRC, RARRES3, RGS19, RHOH, RUNX3, STAT1, TLR7, TLR8 (includes EG:51311), TNFSF13B, TYROBP, VAV1                                                                                                                                                                                                                                                                                                                                                                                                                                                                          | 29 |
| Cellular Development              | maturation                    | maturation of lymphocytes                      | 9,91E-09 | BTK, BTLA, CD4, CD19, CD28, CD86, CD247, IGHM, ITK, LCK, PTPRC, RHOH, RUNX3, TNFSF13B, VAV1                                                                                                                                                                                                                                                                                                                                                                                                                                                                                                                                                                                            | 15 |
| Cellular Development              | generation                    | generation of T lymphocytes                    | 2,01E-10 | CD4, CD28, CD86, HLA-DQB1, ICOS, IL10RA, IL12RB1, IL27RA, IL2RG, ITK, JAK3, PSMB9, STAT4, TNFSF13B                                                                                                                                                                                                                                                                                                                                                                                                                                                                                                                                                                                     | 14 |
| Cellular Development              | cell spreading                | cell spreading of blood cells                  | 6,64E-09 | CD19, CD247, CD3E, CORO1A, FGR, GZMB, HCK, ICOS, ITGAL, ITGB2, WAS                                                                                                                                                                                                                                                                                                                                                                                                                                                                                                                                                                                                                     | 11 |
| Cellular Development              | cell spreading                | cell spreading of leukocytes                   | 1,58E-08 | CD19, CD247, CD3E, CORO1A, FGR, HCK, ICOS, ITGAL, ITGB2, WAS                                                                                                                                                                                                                                                                                                                                                                                                                                                                                                                                                                                                                           | 10 |
| Cellular Development              | polarization                  | polarization of T lymphocytes                  | 1,08E-08 | CCL19, CD28, ICOS, IL12RB1, IL1B, IRF4, LCK, RASSF5, SLAMF1, STAT4, VAV1                                                                                                                                                                                                                                                                                                                                                                                                                                                                                                                                                                                                               | 11 |
| Cellular Development              | proliferation                 | proliferation of thymocytes                    | 1,09E-08 | CD2, CD28, CD3E, IL1B, IL2RG, ITK, JAK3, LCP2, MYB (includes EG:4602), PTPN6, TNFRSF1B, WAS, ZAP70                                                                                                                                                                                                                                                                                                                                                                                                                                                                                                                                                                                     | 13 |
| Cellular Development              | activation-induced cell death | activation-induced cell death of T lymphocytes | 1,83E-08 | CCR5, CD28, CD3E, CIITA, ITK, MAP4K1, PRF1, RAC2, STAT1                                                                                                                                                                                                                                                                                                                                                                                                                                                                                                                                                                                                                                | 9  |
| Cellular Development              | positive selection            | positive selection of T lymphocytes            | 6,77E-08 | CD4, ITK, RHOH, SIT1, TRAT1, VAV1                                                                                                                                                                                                                                                                                                                                                                                                                                                                                                                                                                                                                                                      | 6  |
| Cellular Growth and Proliferation | proliferation                 | proliferation of leukocytes                    | 1,07E-52 | ADA, BTK, BTLA, CCL4, CCL20, CCR2, CCR5, CD2, CD4, CD6, CD14, CD19, CD22, CD27, CD28, CD37, CD48, CD84, CD86, CD247, CD1D, CD3E, CD3G, CD79A, CD8A, CLEC10A, CORO1A, CR2, CSF1R, CSF2RB, CSF3R, CYSLTR1, DEF6, DGKA, DOCK2, FYB, HCK, HLA-DRB1, ICOS, IDO1, IGHG1, IGHM, IGKC, IKZF1, IL10RA, IL1B, IL1RN, IL27RA, IL2RB, IL2RG, IL7R, IMPDH1, IRF1, IRF4, ISG20, ITGAL, ITGAX, ITGB2, ITK, JAK3, KLRK1, LCK, LCP2, LILRB1, LST1, LY86, LY96, MS4A1, MYB (includes EG:4602), PRKCB, PTPN6, PTPRC, RAC2, RUNX3, SASH3, SH2D1A, SH2D2A, SLAMF1, SLAMF7, SLPI, SPIB, STAT1, STAT4, TAC1, TCIRG1, TCL1A, TLR7, TNFRSF17, TNFRSF1B, TNFSF13B, TRD@, TYROBP, UBASH3A, VAV1, WAS, XCL1, ZAP70 | 97 |
| Cellular Growth                   | proliferation                 | proliferation of blood                         | 5,31E-51 | ADA, BTK, BTLA, CCL3, CCL4, CCL20, CCR2, CCR5, CD2, CD4, CD6, CD14, CD19, CD22, CD27, CD28, CD37, CD48, CD84, CD86, CD247, CD1D, CD3E,                                                                                                                                                                                                                                                                                                                                                                                                                                                                                                                                                 | 98 |



|                                   |               |                                         |          |                                                                                                                                                                                                                                                                                                                                                                                                                                                                                                                                                                                                                                                                                                                                                                                                                                                                                                                                                                                       |     |
|-----------------------------------|---------------|-----------------------------------------|----------|---------------------------------------------------------------------------------------------------------------------------------------------------------------------------------------------------------------------------------------------------------------------------------------------------------------------------------------------------------------------------------------------------------------------------------------------------------------------------------------------------------------------------------------------------------------------------------------------------------------------------------------------------------------------------------------------------------------------------------------------------------------------------------------------------------------------------------------------------------------------------------------------------------------------------------------------------------------------------------------|-----|
| and Proliferation                 |               | cells                                   |          | CD3G, CD79A, CD8A, CLEC10A, CORO1A, CR2, CSF1R, CSF2RB, CSF3R, CYSLTR1, DEF6, DGKA, DOCK2, FYB, HCK, HLA-DRB1, ICOS, IDO1, IGHG1, IGHM, IGKC, IKZF1, IL10RA, IL1B, IL1RN, IL27RA, IL2RB, IL2RG, IL7R, IMPDH1, IRF1, IRF4, ISG20, ITGAL, ITGAX, ITGB2, ITK, JAK3, KLRK1, LCK, LCP2, LILRB1, LST1, LY86, LY96, MS4A1, MYB (includes EG:4602), PRKCB, PTPN6, PTPRC, RAC2, RUNX3, SASH3, SH2D1A, SH2D2A, SLAMF1, SLAMF7, SLPI, SPIB, STAT1, STAT4, TAC1, TCIRG1, TCL1A, TLR7, TNFRSF17, TNFRSF1B, TNFSF13B, TRD@, TYROBP, UBASH3A, VAV1, WAS, XCL1, ZAP70                                                                                                                                                                                                                                                                                                                                                                                                                                 |     |
| Cellular Growth and Proliferation | proliferation | proliferation of mononuclear leukocytes | 7,87E-50 | ADA, BTK, BTLA, CCL4, CCR2, CCR5, CD2, CD4, CD6, CD14, CD19, CD22, CD27, CD28, CD37, CD48, CD84, CD86, CD247, CD1D, CD3E, CD3G, CD79A, CD8A, CLEC10A, CORO1A, CR2, CSF1R, CSF2RB, DEF6, DGKA, DOCK2, FYB, HCK, HLA-DRB1, ICOS, IDO1, IGHG1, IGHM, IGKC, IKZF1, IL1B, IL1RN, IL27RA, IL2RB, IL2RG, IL7R, IMPDH1, IRF1, IRF4, ISG20, ITGAL, ITGAX, ITGB2, ITK, JAK3, KLRK1, LCK, LCP2, LILRB1, LST1, LY86, LY96, MS4A1, MYB (includes EG:4602), PRKCB, PTPN6, PTPRC, RAC2, RUNX3, SASH3, SH2D1A, SH2D2A, SLAMF1, SLAMF7, SLPI, SPIB, STAT1, STAT4, TAC1, TCIRG1, TCL1A, TLR7, TNFRSF17, TNFRSF1B, TNFSF13B, TRD@, UBASH3A, VAV1, WAS, XCL1, ZAP70                                                                                                                                                                                                                                                                                                                                       | 92  |
| Cellular Growth and Proliferation | proliferation | proliferation of lymphocytes            | 5,76E-49 | ADA, BTK, BTLA, CCL4, CCR2, CCR5, CD2, CD4, CD6, CD14, CD19, CD22, CD27, CD28, CD37, CD48, CD84, CD86, CD247, CD1D, CD3E, CD3G, CD79A, CD8A, CLEC10A, CORO1A, CR2, CSF2RB, DEF6, DGKA, DOCK2, FYB, HCK, HLA-DRB1, ICOS, IDO1, IGHG1, IGHM, IGKC, IKZF1, IL1B, IL1RN, IL27RA, IL2RB, IL2RG, IL7R, IMPDH1, IRF1, IRF4, ISG20, ITGAL, ITGAX, ITGB2, ITK, JAK3, KLRK1, LCK, LCP2, LILRB1, LST1, LY86, LY96, MS4A1, MYB (includes EG:4602), PRKCB, PTPN6, PTPRC, RAC2, RUNX3, SASH3, SH2D1A, SH2D2A, SLAMF1, SLAMF7, SLPI, SPIB, STAT1, STAT4, TAC1, TCIRG1, TCL1A, TLR7, TNFRSF17, TNFRSF1B, TNFSF13B, TRD@, UBASH3A, VAV1, WAS, XCL1, ZAP70                                                                                                                                                                                                                                                                                                                                              | 91  |
| Cellular Growth and Proliferation | proliferation | proliferation of normal cells           | 8,89E-42 | ADA, AIF1, ASCL2, BCL2A1, BTK, BTLA, C3, C3AR1, CCL2, CCL3, CCL4, CCL5, CCL19, CCL20, CCL21, CCR2, CCR5, CCR7, CD2, CD4, CD6, CD14, CD19, CD22, CD27, CD28, CD37, CD48, CD84, CD86, CD247, CD1D, CD3E, CD3G, CD79A, CD8A, CIITA, CLEC10A, CORO1A, CR2, CSF1R, CSF2RB, CSF3R, CXCL1, CXCL2, CXCL9, CXCL10, CYSLTR1, DEF6, DGKA, DOCK2, FCER1G, FYB, GABBR1, GRN, GZMB, HCK, HLA-DPB1, HLA-DRB1, ICOS, IDO1, IGHG1, IGHM, IGKC, IKZF1, IL10RA, IL18RAP, IL1B, IL1RN, IL27RA, IL2RB, IL2RG, IL7R, IMPDH1, IRF1, IRF4, ISG20, ITGAL, ITGAX, ITGB2, ITK, JAK3, KLRK1, LCK, LCN2, LCP2, LILRB1, LST1, LY86, LY96, MMP7, MS4A1, MYB (includes EG:4602), NCF1, PRKCB, PTGDS, PTPN6, PTPRC, PTTG1, RAC2, RUNX3, SAA1, SASH3, SH2D1A, SH2D2A, SLAMF1, SLAMF7, SLPI, SPIB, STAT1, STAT4, TAC1, TCIRG1, TCL1A, TLR7, TNFRSF17, TNFRSF1B, TNFSF13B, TRD@, TYROBP, UBASH3A, VAV1, WAS, XCL1, ZAP70                                                                                                  | 125 |
| Cellular Growth and Proliferation | proliferation | proliferation of eukaryotic cells       | 2,19E-35 | ADA, AIF1, AIM2, ASCL2, BCL2A1, BTK, BTLA, C3, C3AR1, CASP1, CCL2, CCL3, CCL4, CCL5, CCL19, CCL20, CCL21, CCR2, CCR5, CCR7, CD2, CD4, CD6, CD14, CD19, CD22, CD27, CD28, CD37, CD48, CD84, CD86, CD247, CD1D, CD3E, CD3G, CD79A, CD8A, CIITA, CLEC10A, CLEC7A, CORO1A, CR2, CSF1R, CSF2RB, CSF3R, CTSS, CXCL1, CXCL2, CXCL9, CXCL10, CYBB, CYSLTR1, DEF6, DGKA, DOCK2, FCER1G, FYB, GABBR1, GRN, GZMB, HCK, HLA-DPB1, HLA-DRB1, ICOS, IDO1, IGHG1, IGHM, IGKC, IKZF1, IL16, IL10RA, IL12RB1, IL18RAP, IL1B, IL1RN, IL27RA, IL2RB, IL2RG, IL7R, IMPDH1, IRF1, IRF4, ISG20, ITGAL, ITGAX, ITGB2, ITK, JAK3, KLRK1, LCK, LCN2, LCP2, LILRB1, LST1, LY86, LY96, MMP7, MS4A1, MYB (includes EG:4602), NCF1, PLAC8, PRKCB, PTGDS, PTPN6, PTPRC, PTTG1, RAC2, RARRES3, RASSF5, REG1A, RUNX3, S100A8, SAA1, SASH3, SH2D1A, SH2D2A, SLAMF1, SLAMF7, SLPI, SPIB, STAT1, STAT4, TAC1, TCIRG1, TCL1A, TLR7, TNFRSF17, TNFRSF25, TNFRSF1B, TNFSF13B, TRD@, TYROBP, UBASH3A, VAV1, WAS, XCL1, ZAP70 | 138 |
| Cellular Growth and Proliferation | proliferation | proliferation of T lymphocytes          | 1,03E-31 | BTLA, CCL4, CCR2, CCR5, CD2, CD4, CD6, CD14, CD27, CD28, CD37, CD48, CD84, CD86, CD247, CD3E, CD3G, CD8A, CLEC10A, CORO1A, CSF2RB, DEF6, DGKA, DOCK2, FYB, HLA-DRB1, ICOS, IDO1, IGHG1, IGHM, IKZF1, IL1B, IL27RA, IL2RB, IL2RG, IL7R, ISG20, ITGAL, ITGAX, ITGB2, ITK, JAK3, KLRK1, LCK, LCP2, LILRB1, MYB (includes EG:4602), PTPN6, PTPRC, RAC2, RUNX3, SASH3, SH2D1A, SH2D2A, STAT1, STAT4, TCIRG1, TNFRSF1B, TNFSF13B, TRD@, UBASH3A, VAV1, WAS, XCL1, ZAP70                                                                                                                                                                                                                                                                                                                                                                                                                                                                                                                     | 65  |
| Cellular Growth and Proliferation | proliferation | proliferation of cells                  | 3,03E-30 | ADA, AIF1, AIM2, ASCL2, BCL11B, BCL2A1, BTK, BTLA, C3, C3AR1, CASP1, CCL2, CCL3, CCL4, CCL5, CCL19, CCL20, CCL21, CCR2, CCR5, CCR7, CD2, CD4, CD6, CD14, CD19, CD22, CD27, CD28, CD37, CD48, CD84, CD86, CD247, CD1D, CD3E, CD3G, CD79A, CD8A, CIITA, CLEC10A, CLEC7A, CORO1A, CR2,                                                                                                                                                                                                                                                                                                                                                                                                                                                                                                                                                                                                                                                                                                   | 147 |

|                                   |               |                                       |          |                                                                                                                                                                                                                                                                                                                                                                                                                                                                                                                                                                                                                                                                                                                                                                   |    |
|-----------------------------------|---------------|---------------------------------------|----------|-------------------------------------------------------------------------------------------------------------------------------------------------------------------------------------------------------------------------------------------------------------------------------------------------------------------------------------------------------------------------------------------------------------------------------------------------------------------------------------------------------------------------------------------------------------------------------------------------------------------------------------------------------------------------------------------------------------------------------------------------------------------|----|
| on                                |               |                                       |          | CSF1R, CSF2RB, CSF3R, CTSS, CXCL1, CXCL2, CXCL9, CXCL10, CYBB, CYSLTR1, DEF6, DGKA, DOCK2, FCER1G, FYB, GABBR1, GRN, GZMB, HCK, HCLS1, HLA-DPB1, HLA-DRB1, ICOS, IDO1, IFITM1, IGHG1, IGHM, IGKC, IKZF1, IL16, IL10RA, IL12RB1, IL18RAP, IL1B, IL1RN, IL27RA, IL2RB, IL2RG, IL7R, IMPDH1, IRF1, IRF4, ISG20, ITGAL, ITGAX, ITGB2, ITK, JAK3, KLRK1, LAMP3, LCK, LCN2, LCP2, LILRB1, LST1, LY86, LY96, MAP4K1, MMP7, MS4A1, MYB (includes EG:4602), NCF1, NOD2, PLAC8, PRKCB, PTGDS, PTPN6, PTPRC, PTTG1, RAC2, RARRES3, RASSF5, REG1A, RUNX3, S100A8, SAA1, SASH3, SH2D1A, SH2D2A, SIRPG, SLAMF1, SLAMF7, SLPI, SPIB, STAT1, STAT4, TAC1, TCIRG1, TCL1A, TIMP1, TLR7, TNFRSF17, TNFRSF25, TNFRSF1B, TNFSF13B, TRD@, TYROBP, UBASH3A, VAV1, WARS, WAS, XCL1, ZAP70 |    |
| Cellular Growth and Proliferation | proliferation | proliferation of B lymphocytes        | 1,89E-21 | ADA, BTK, BTLA, CD4, CD19, CD22, CD86, CD3E, CD79A, CD8A, CR2, HCK, IGHM, IGKC, IL1RN, IL2RG, IL7R, IRF4, LY86, LY96, MS4A1, PRKCB, PTPN6, PTPRC, SASH3, SLAMF1, SLAMF7, SLPI, SPIB, STAT1, TCIRG1, TCL1A, TLR7, TNFRSF17, TNFSF13B, VAV1                                                                                                                                                                                                                                                                                                                                                                                                                                                                                                                         | 36 |
| Cellular Growth and Proliferation | proliferation | proliferation of thymocytes           | 1,09E-08 | CD2, CD28, CD3E, IL1B, IL2RG, ITK, JAK3, LCP2, MYB (includes EG:4602), PTPN6, TNFRSF1B, WAS, ZAP70                                                                                                                                                                                                                                                                                                                                                                                                                                                                                                                                                                                                                                                                | 13 |
| Cellular Growth and Proliferation | proliferation | proliferation of leukocyte cell lines | 1,30E-08 | CD28, CD1D, CD3E, CD8A, CLEC7A, CSF1R, CSF2RB, CSF3R, CYSLTR1, HCK, IL10RA, IL12RB1, IL1B, IL2RB, IL2RG, IL7R, JAK3, MYB (includes EG:4602), PTPRC, TNFRSF1B                                                                                                                                                                                                                                                                                                                                                                                                                                                                                                                                                                                                      | 20 |
| Cellular Growth and Proliferation | growth        | growth of blood cells                 | 7,24E-21 | BTK, C3, CCL2, CCL3, CCL4, CCL11, CD2, CD4, CD14, CD22, CD27, CD28, CD86, CD163, CD3E, CR2, CSF1R, CXCL10, ICOS, IGHM, IL10RA, IL1B, IL2RB, IL7R, IRF1, JAK3, LCP2, MYB (includes EG:4602), PRF1, PTPN6, SLAMF1, STAT4, TCL1A, TNFRSF1B, TNFSF13B, ZAP70                                                                                                                                                                                                                                                                                                                                                                                                                                                                                                          | 36 |
| Cellular Growth and Proliferation | growth        | growth of leukocytes                  | 2,39E-20 | BTK, C3, CCL2, CCL3, CCL11, CD2, CD4, CD14, CD22, CD27, CD28, CD86, CD3E, CR2, CSF1R, CXCL10, ICOS, IGHM, IL10RA, IL1B, IL2RB, IL7R, IRF1, JAK3, LCP2, PRF1, PTPN6, SLAMF1, STAT4, TCL1A, TNFRSF1B, TNFSF13B, ZAP70                                                                                                                                                                                                                                                                                                                                                                                                                                                                                                                                               | 33 |
| Cellular Growth and Proliferation | growth        | growth of lymphocytes                 | 1,61E-17 | BTK, C3, CD2, CD4, CD14, CD22, CD27, CD28, CD86, CD3E, CR2, ICOS, IGHM, IL1B, IL2RB, IL7R, IRF1, JAK3, LCP2, PRF1, PTPN6, SLAMF1, STAT4, TCL1A, TNFRSF1B, TNFSF13B, ZAP70                                                                                                                                                                                                                                                                                                                                                                                                                                                                                                                                                                                         | 27 |
| Cellular Growth and Proliferation | growth        | growth of normal cells                | 4,67E-16 | AIF1, ALOX5, BTK, C3, CCL2, CCL3, CCL4, CCL11, CD2, CD4, CD14, CD22, CD27, CD28, CD86, CD163, CD3E, CR2, CSF1R, CXCL10, CXCR3, ICOS, IGHG1, IGHM, IL10RA, IL1B, IL1RN, IL2RB, IL7R, IRF1, JAK3, LCP2, MYB (includes EG:4602), PRF1, PTPN6, PTTG1, RUNX3, SLAMF1, STAT1, STAT4, TCL1A, TIMP1, TNFRSF1B, TNFSF13B, VAV1, ZAP70                                                                                                                                                                                                                                                                                                                                                                                                                                      | 46 |
| Cellular Growth and Proliferation | growth        | growth of T lymphocytes               | 4,47E-14 | C3, CD2, CD4, CD27, CD28, CD86, CD3E, ICOS, IGHM, IL1B, IRF1, JAK3, LCP2, PRF1, PTPN6, SLAMF1, STAT4, TCL1A, TNFRSF1B, TNFSF13B, ZAP70                                                                                                                                                                                                                                                                                                                                                                                                                                                                                                                                                                                                                            | 21 |
| Cellular Growth and Proliferation | growth        | growth of eukaryotic cells            | 1,99E-10 | AIF1, ALOX5, BTK, C3, CASP1, CCL2, CCL3, CCL4, CCL11, CD2, CD4, CD14, CD19, CD22, CD27, CD28, CD86, CD163, CD3E, CR2, CSF1R, CSF2RB, CSF3R, CXCL1, CXCL2, CXCL10, CXCR3, FCER1G, GBP2, GRN, GZMB, ICOS, IDO1, IGHG1, IGHM, IKZF1, IL10RA, IL12RB1, IL1B, IL1RN, IL2RB, IL2RG, IL7R, IRF1, JAK3, LCP1, LCP2, MMP7, MYB (includes EG:4602), PLAC8, PRF1, PRKCB, PTPN6, PTPN22, PTTG1, PYHIN1 (includes EG:149628), RASD1, RASSF5, RUNX3, SLAMF1, STAT1, STAT4, TCL1A, TIMP1, TNFRSF17, TNFRSF1B, TNFSF13B, VAV1, ZAP70                                                                                                                                                                                                                                              | 69 |
| Cellular Growth and Proliferation | expansion     | expansion of lymphocytes              | 8,89E-15 | BTK, C3, CD2, CD4, CD27, CD28, CD86, CD3E, CR2, ICOS, IGHM, IL1B, IL7R, IRF1, JAK3, LCP2, PRF1, SLAMF1, STAT4, TNFRSF1B, TNFSF13B, ZAP70                                                                                                                                                                                                                                                                                                                                                                                                                                                                                                                                                                                                                          | 22 |
| Cellular Growth and Proliferation | expansion     | expansion                             | 9,46E-15 | BTK, C3, CD2, CD4, CD27, CD28, CD86, CD163, CD3E, CR2, ICOS, IGHM,                                                                                                                                                                                                                                                                                                                                                                                                                                                                                                                                                                                                                                                                                                | 25 |

|                                   |             |                                       |          |                                                                                                                                                                                                                                                                                                                                                                                                                                                                                                                                                                                                                              |    |
|-----------------------------------|-------------|---------------------------------------|----------|------------------------------------------------------------------------------------------------------------------------------------------------------------------------------------------------------------------------------------------------------------------------------------------------------------------------------------------------------------------------------------------------------------------------------------------------------------------------------------------------------------------------------------------------------------------------------------------------------------------------------|----|
| Growth and Proliferation          |             | of blood cells                        |          | IL10RA, IL1B, IL7R, IRF1, JAK3, LCP2, MYB (includes EG:4602), PRF1, SLAMF1, STAT4, TNFRSF1B, TNFSF13B, ZAP70                                                                                                                                                                                                                                                                                                                                                                                                                                                                                                                 |    |
| Cellular Growth and Proliferation | expansion   | expansion of leukocytes               | 3,51E-14 | BTK, C3, CD2, CD4, CD27, CD28, CD86, CD3E, CR2, ICOS, IGHM, IL10RA, IL1B, IL7R, IRF1, JAK3, LCP2, PRF1, SLAMF1, STAT4, TNFRSF1B, TNFSF13B, ZAP70                                                                                                                                                                                                                                                                                                                                                                                                                                                                             | 23 |
| Cellular Growth and Proliferation | expansion   | expansion of T lymphocytes            | 4,12E-13 | C3, CD2, CD4, CD27, CD28, CD86, CD3E, ICOS, IGHM, IL1B, IRF1, JAK3, LCP2, PRF1, SLAMF1, STAT4, TNFRSF1B, TNFSF13B, ZAP70                                                                                                                                                                                                                                                                                                                                                                                                                                                                                                     | 19 |
| Cellular Growth and Proliferation | generation  | generation of lymphocytes             | 3,58E-14 | C3, CD4, CD28, CD86, CR2, HLA-DQB1, ICOS, IL10RA, IL12RB1, IL1RN, IL27RA, IL2RG, IL7R, IRF4, ITK, JAK3, PSMB9, STAT4, TNFSF13B                                                                                                                                                                                                                                                                                                                                                                                                                                                                                               | 19 |
| Cellular Growth and Proliferation | generation  | generation of leukocytes              | 1,00E-13 | C3, CD4, CD28, CD86, CR2, HLA-DQB1, ICOS, IL10RA, IL12RB1, IL1RN, IL27RA, IL2RG, IL7R, IRF4, ITK, JAK3, LTB, PSMB9, STAT4, TNFSF13B                                                                                                                                                                                                                                                                                                                                                                                                                                                                                          | 20 |
| Cellular Growth and Proliferation | generation  | generation of T lymphocytes           | 2,01E-10 | CD4, CD28, CD86, HLA-DQB1, ICOS, IL10RA, IL12RB1, IL27RA, IL2RG, ITK, JAK3, PSMB9, STAT4, TNFSF13B                                                                                                                                                                                                                                                                                                                                                                                                                                                                                                                           | 14 |
| Cellular Growth and Proliferation | stimulation | stimulation of eukaryotic cells       | 4,27E-10 | C3, CCL5, CCL11, CCL20, CD2, CD4, CD28, CD86, CD1D, CD8A, FGD3, ICOS, IL1B, IL2RB, KLRK1, LTF, PTPRC, SLAMF1, TAC1, TNFRSF25, TNFSF13B                                                                                                                                                                                                                                                                                                                                                                                                                                                                                       | 21 |
| Cellular Growth and Proliferation | stimulation | stimulation of leukocytes             | 2,52E-09 | C3, CCL5, CCL11, CCL20, CD2, CD28, CD86, CD1D, ICOS, IL1B, KLRK1, PTPRC, SLAMF1, TAC1, TNFRSF25, TNFSF13B                                                                                                                                                                                                                                                                                                                                                                                                                                                                                                                    | 16 |
| Cellular Growth and Proliferation | stimulation | stimulation of normal cells           | 2,94E-09 | C3, CCL5, CCL11, CCL20, CD2, CD4, CD28, CD86, CD1D, FGD3, ICOS, IL1B, KLRK1, LTF, PTPRC, SLAMF1, TAC1, TNFRSF25, TNFSF13B                                                                                                                                                                                                                                                                                                                                                                                                                                                                                                    | 19 |
| Cellular Growth and Proliferation | stimulation | stimulation of T lymphocytes          | 4,02E-08 | C3, CD2, CD28, CD86, CD1D, ICOS, KLRK1, PTPRC, SLAMF1, TNFRSF25, TNFSF13B                                                                                                                                                                                                                                                                                                                                                                                                                                                                                                                                                    | 11 |
| Cellular Growth and Proliferation | stimulation | stimulation of mononuclear leukocytes | 5,28E-08 | C3, CCL20, CD2, CD28, CD86, CD1D, ICOS, KLRK1, PTPRC, SLAMF1, TNFRSF25, TNFSF13B                                                                                                                                                                                                                                                                                                                                                                                                                                                                                                                                             | 12 |
| Tissue Morphology                 | quantity    | quantity of leukocytes                | 3,47E-48 | ADA, ALOX5, BCL2A1, BTK, BTLA, C3, C1QA, CCL2, CCL3, CCL5, CCL11, CCL19, CCL21, CCR2, CCR7, CD4, CD19, CD22, CD27, CD28, CD69, CD86, CD247, CD1D, CD3D, CD3E, CD3G, CD79A, CD8A, CIITA, CR2, CSF1R, CSF2RB, CSF3R, CTSS, CXCL2, CXCL10, CXCL13, CXCR3, CXCR6 (includes EG:10663), CYTIP, DEF6, FCER1G, HLA-DQA1, ICOS, IGHM, IGKC, IKZF1, IL10RA, IL12RB1, IL1B, IL27RA, IL2RB, IL2RG, IL7R, IRF1, IRF4, ITGB2, ITK, JAK3, LCK, LCP2, LSP1, LTB, MS4A1, POU2AF1, PRF1, PTPN6, PTPRC, RAC2, RHOH, RUNX3, S100A8, SELL, SELPLG, SIT1, SLA, STAT1, STAT4, TAP1, TNFRSF25, TNFRSF1B, TNFSF13B, TYROBP, VAV1, WAS, ZAP70, ZC3H12A | 88 |
| Tissue Morphology                 | quantity    | quantity of blood cells               | 1,52E-45 | ADA, ALOX5, BCL2A1, BTK, BTLA, C3, C1QA, CCL2, CCL3, CCL5, CCL11, CCL19, CCL21, CCR2, CCR7, CD4, CD19, CD22, CD27, CD28, CD69, CD86, CD247,                                                                                                                                                                                                                                                                                                                                                                                                                                                                                  | 89 |

|                   |          |                                           |          |                                                                                                                                                                                                                                                                                                                                                                                                                                                                                                                                                                                                                                                                                                                                                         |     |
|-------------------|----------|-------------------------------------------|----------|---------------------------------------------------------------------------------------------------------------------------------------------------------------------------------------------------------------------------------------------------------------------------------------------------------------------------------------------------------------------------------------------------------------------------------------------------------------------------------------------------------------------------------------------------------------------------------------------------------------------------------------------------------------------------------------------------------------------------------------------------------|-----|
| gy                |          |                                           |          | CD1D, CD3D, CD3E, CD3G, CD79A, CD8A, CIITA, CR2, CSF1R, CSF2RB, CSF3R, CTSS, CXCL2, CXCL10, CXCL13, CXCR3, CXCR6 (includes EG:10663), CYTIP, DEF6, FCER1G, HLA-DQA1, ICOS, IGHM, IGKC, IKZF1, IL10RA, IL12RB1, IL1B, IL27RA, IL2RB, IL2RG, IL7R, IRF1, IRF4, ITGB2, ITK, JAK3, LCK, LCP2, LSP1, LTB, MS4A1, MYB (includes EG:4602), POU2AF1, PRF1, PTPN6, PTPRC, RAC2, RHOH, RUNX3, S100A8, SELL, SELPLG, SIT1, SLA, STAT1, STAT4, TAP1, TNFRSF25, TNFRSF1B, TNFSF13B, TYROBP, VAV1, WAS, ZAP70, ZC3H12A                                                                                                                                                                                                                                                |     |
| Tissue Morphology | quantity | quantity of lymphocytes                   | 1,01E-42 | BCL2A1, BTK, BTLA, C3, CCL19, CCL21, CCR2, CCR7, CD4, CD19, CD22, CD27, CD28, CD69, CD86, CD247, CD1D, CD3D, CD3E, CD3G, CD79A, CD8A, CIITA, CR2, CSF1R, CSF2RB, CSF3R, CTSS, CXCL10, CXCL13, CXCR3, CYTIP, DEF6, FCER1G, HLA-DQA1, ICOS, IGHM, IGKC, IKZF1, IL10RA, IL27RA, IL2RB, IL2RG, IL7R, IRF1, ITGB2, ITK, JAK3, LCK, LCP2, LSP1, LTB, MS4A1, POU2AF1, PRF1, PTPN6, PTPRC, RAC2, RHOH, RUNX3, SELL, SELPLG, SIT1, SLA, STAT1, STAT4, TAP1, TNFRSF25, TNFRSF1B, TNFSF13B, TYROBP, VAV1, WAS, ZAP70, ZC3H12A                                                                                                                                                                                                                                      | 72  |
| Tissue Morphology | quantity | quantity of cells                         | 2,65E-32 | ADA, ALOX5, BCL2A1, BTK, BTLA, C3, C1QA, CCL2, CCL3, CCL5, CCL11, CCL19, CCL21, CCR2, CCR5, CCR7, CD4, CD19, CD22, CD27, CD28, CD69, CD86, CD247, CD1D, CD3D, CD3E, CD3G, CD79A, CD8A, CIITA, CR2, CSF1R, CSF2RB, CSF3R, CTSS, CXCL1, CXCL2, CXCL10, CXCL13, CXCR3, CXCR6 (includes EG:10663), CYBB, CYTIP, DEF6, FCER1G, HLA-DQA1, ICOS, IGHG1, IGHM, IGJ, IGKC, IKZF1, IL10RA, IL12RB1, IL1B, IL1RN, IL27RA, IL2RB, IL2RG, IL7R, IRF1, IRF4, ITGAL, ITGB2, ITK, JAK3, LCK, LCP2, LSP1, LTB, MMP7, MS4A1, MYB (includes EG:4602), POU2AF1, PRF1, PSMB10, PTPN6, PTPRC, PTTG1, RAC2, RARRES3, RGS10, RHOH, RUNX3, S100A8, SELL, SELPLG, SH2D1A, SIT1, SLA, ST8SIA4, STAT1, STAT4, TAP1, TNFRSF25, TNFRSF1B, TNFSF13B, TYROBP, VAV1, WAS, ZAP70, ZC3H12A | 103 |
| Tissue Morphology | quantity | quantity of T lymphocytes                 | 9,72E-27 | BCL2A1, BTLA, CCL19, CCL21, CCR2, CCR7, CD4, CD27, CD28, CD86, CD247, CD1D, CD3D, CD3E, CD3G, CIITA, CSF2RB, CTSS, CXCL10, CXCR3, DEF6, IKZF1, IL10RA, IL27RA, IL2RB, IL2RG, IL7R, IRF1, ITGB2, ITK, JAK3, LCK, LCP2, LTB, PTPRC, RHOH, RUNX3, SELPLG, SIT1, STAT1, TAP1, TNFRSF25, TNFRSF1B, TNFSF13B, VAV1, WAS, ZAP70                                                                                                                                                                                                                                                                                                                                                                                                                                | 47  |
| Tissue Morphology | quantity | quantity of B lymphocytes                 | 4,98E-19 | BCL2A1, BTK, C3, CCR7, CD19, CD22, CD27, CD28, CD69, CD79A, CR2, CXCL13, FCER1G, HLA-DQA1, ICOS, IGHM, IGKC, IL2RG, IL7R, ITGB2, JAK3, MS4A1, POU2AF1, PTPN6, RAC2, SLA, TNFRSF1B, TNFSF13B, VAV1, WAS, ZC3H12A                                                                                                                                                                                                                                                                                                                                                                                                                                                                                                                                         | 31  |
| Tissue Morphology | quantity | quantity of antigen presenting cells      | 1,10E-12 | ADA, CCL2, CCL3, CCL19, CCL21, CCR2, CCR7, CSF1R, CTSS, CXCL10, CXCL13, CXCR6 (includes EG:10663), IKZF1, IL12RB1, IL1B, IRF1, IRF4, ITGB2, LSP1, LTB, SELPLG, STAT4, TYROBP                                                                                                                                                                                                                                                                                                                                                                                                                                                                                                                                                                            | 23  |
| Tissue Morphology | quantity | quantity of plasma cells                  | 8,00E-11 | CD22, ICOS, IL7R, ITGB2, PTPN6, RAC2, TNFRSF1B, TNFSF13B, ZC3H12A                                                                                                                                                                                                                                                                                                                                                                                                                                                                                                                                                                                                                                                                                       | 9   |
| Tissue Morphology | quantity | quantity of phagocytes                    | 2,02E-10 | ADA, C1QA, CCL2, CCL3, CCR2, CD1D, CSF1R, CSF3R, CTSS, CXCL10, CXCR6 (includes EG:10663), IL12RB1, IL1B, ITGB2, JAK3, LSP1, RAC2, S100A8, SELL, SELPLG, STAT4, TNFRSF1B                                                                                                                                                                                                                                                                                                                                                                                                                                                                                                                                                                                 | 22  |
| Tissue Morphology | quantity | quantity of natural killer cells          | 2,32E-09 | CD86, ICOS, IL2RB, IL2RG, IRF1, JAK3, LTB, PRF1, PTPRC, TNFRSF25, TYROBP                                                                                                                                                                                                                                                                                                                                                                                                                                                                                                                                                                                                                                                                                | 11  |
| Tissue Morphology | quantity | quantity of granulocytes                  | 4,90E-09 | ADA, ALOX5, C1QA, CCL11, CD1D, CD8A, CSF2RB, CSF3R, IL1B, ITGB2, JAK3, RAC2, S100A8, SELL, SELPLG, STAT4, TNFRSF25, TNFRSF1B                                                                                                                                                                                                                                                                                                                                                                                                                                                                                                                                                                                                                            | 18  |
| Tissue Morphology | quantity | quantity of myeloid cells                 | 6,29E-09 | ADA, ALOX5, C1QA, CCL11, CD1D, CD8A, CSF2RB, CSF3R, IKZF1, IL1B, ITGB2, JAK3, RAC2, S100A8, SELL, SELPLG, STAT4, TNFRSF25, TNFRSF1B                                                                                                                                                                                                                                                                                                                                                                                                                                                                                                                                                                                                                     | 19  |
| Tissue Morphology | quantity | quantity of lymphatic system cells        | 7,93E-09 | ADA, ALOX5, C1QA, CCL11, CD1D, CD8A, CSF2RB, CSF3R, CXCL13, IKZF1, IL1B, ITGB2, JAK3, PSMB10, RAC2, S100A8, SELL, SELPLG, STAT4, TNFRSF25, TNFRSF1B                                                                                                                                                                                                                                                                                                                                                                                                                                                                                                                                                                                                     | 21  |
| Tissue Morphology | quantity | quantity of intraepithelial T lymphocytes | 3,14E-08 | IKZF1, IL2RG, IL7R, IRF1, PTPRC, TAP1                                                                                                                                                                                                                                                                                                                                                                                                                                                                                                                                                                                                                                                                                                                   | 6   |
| Tissue Morphology | quantity | quantity of dendritic cells               | 4,93E-08 | CCL19, CCL21, CCR2, CCR7, CXCL13, IKZF1, IRF1, IRF4, ITGB2, LTB, TYROBP                                                                                                                                                                                                                                                                                                                                                                                                                                                                                                                                                                                                                                                                                 | 11  |
| Tissue Morphology | quantity | quantity of natural killer                | 6,58E-08 | CD1D, CD3E, CSF2RB, IKZF1, IL2RB, IL2RG, PTPRC, VAV1                                                                                                                                                                                                                                                                                                                                                                                                                                                                                                                                                                                                                                                                                                    | 8   |

|               |                 |                                       |          |                                                                                                                                                                                                                                                                                                                                                                                                                                                                                                                                                                                                                                                                                                              |    |  |
|---------------|-----------------|---------------------------------------|----------|--------------------------------------------------------------------------------------------------------------------------------------------------------------------------------------------------------------------------------------------------------------------------------------------------------------------------------------------------------------------------------------------------------------------------------------------------------------------------------------------------------------------------------------------------------------------------------------------------------------------------------------------------------------------------------------------------------------|----|--|
| gy            |                 | T lymphocytes                         |          |                                                                                                                                                                                                                                                                                                                                                                                                                                                                                                                                                                                                                                                                                                              |    |  |
| Hematopoiesis | development     | development of mononuclear leukocytes | 7,26E-47 | ADA, BCL11B, BCL2A1, BTK, CASP1, CCL3, CCL4, CCL5, CCL19, CCR5, CCR7, CD2, CD4, CD6, CD19, CD27, CD28, CD69, CD86, CD247, CD1D, CD3D, CD3E, CD3G, CD8A, CIITA, CLEC10A, CR2, CSF3R, CXCL11, DEF6, DOCK2, EOMES, FCER1G, GZMA, GZMB, HLA-DOA, HLA-DQA1, HLA-DQB1, ICOS, IDO1, IGHG1, IGHM, IKZF1, IL10RA, IL12RB1, IL1B, IL1RN, IL27RA, IL2RB, IL2RG, IL7R, IRF1, IRF4, ITGAL, ITGB2, ITK, JAK3, LAX1, LCK, LCP2, LTB, MAP4K1, MYB (includes EG:4602), NCAPH2, POU2AF1, PRF1, PSMB9, PTPN6, PTPN22, PTPRC, RAC2, RASSF5, RHOH, RUNX3, SH2D1A, SH2D2A, SIT1, SLAMF1, SPIB, STAT1, STAT4, TCL1A, TNFRSF25, TNFRSF1B, TNFSF13B, TRAT1, VAV1, WAS, XCL1, ZAP70                                                    | 91 |  |
| Hematopoiesis | development     | development of leukocytes             | 8,10E-47 | ADA, BCL11B, BCL2A1, BTK, CASP1, CCL3, CCL4, CCL5, CCL19, CCR5, CCR7, CD2, CD4, CD6, CD19, CD27, CD28, CD69, CD86, CD247, CD1D, CD3D, CD3E, CD3G, CD8A, CIITA, CLEC10A, CR2, CSF1R, CSF3R, CXCL11, DEF6, DOCK2, EOMES, FCER1G, GZMA, GZMB, HLA-DOA, HLA-DQA1, HLA-DQB1, ICOS, IDO1, IGHG1, IGHM, IKZF1, IL10RA, IL12RB1, IL1B, IL1RN, IL27RA, IL2RB, IL2RG, IL7R, IRF1, IRF4, ITGAL, ITGB2, ITK, JAK3, LAX1, LCK, LCP2, LTB, MAP4K1, MYB (includes EG:4602), NCAPH2, POU2AF1, PRF1, PSMB9, PTPN6, PTPN22, PTPRC, RAC2, RASSF5, RHOH, RUNX3, SH2D1A, SH2D2A, SIT1, SLAMF1, SPIB, STAT1, STAT4, TCL1A, TNFRSF25, TNFRSF1B, TNFSF13B, TRAT1, VAV1, WAS, XCL1, ZAP70                                             | 92 |  |
| Hematopoiesis | development     | development of lymphocytes            | 3,82E-46 | ADA, BCL11B, BCL2A1, BTK, CASP1, CCL3, CCL4, CCL5, CCL19, CCR5, CCR7, CD2, CD4, CD6, CD19, CD27, CD28, CD69, CD86, CD247, CD1D, CD3D, CD3E, CD3G, CD8A, CIITA, CLEC10A, CR2, CSF3R, DEF6, DOCK2, EOMES, FCER1G, GZMA, GZMB, HLA-DOA, HLA-DQA1, HLA-DQB1, ICOS, IDO1, IGHG1, IGHM, IKZF1, IL10RA, IL12RB1, IL1B, IL1RN, IL27RA, IL2RB, IL2RG, IL7R, IRF1, IRF4, ITGAL, ITGB2, ITK, JAK3, LAX1, LCK, LCP2, LTB, MAP4K1, MYB (includes EG:4602), NCAPH2, POU2AF1, PRF1, PSMB9, PTPN6, PTPN22, PTPRC, RAC2, RASSF5, RHOH, RUNX3, SH2D1A, SH2D2A, SIT1, SLAMF1, SPIB, STAT1, STAT4, TCL1A, TNFRSF25, TNFRSF1B, TNFSF13B, TRAT1, VAV1, WAS, XCL1, ZAP70                                                            | 90 |  |
| Hematopoiesis | development     | T cell development                    | 3,75E-43 | ADA, BCL11B, BCL2A1, CASP1, CCL3, CCL4, CCL5, CCL19, CCR5, CCR7, CD2, CD4, CD6, CD27, CD28, CD86, CD247, CD1D, CD3D, CD3E, CD3G, CD8A, CIITA, CLEC10A, DEF6, DOCK2, EOMES, FCER1G, GZMA, GZMB, HLA-DOA, HLA-DQA1, HLA-DQB1, ICOS, IDO1, IGHG1, IGHM, IKZF1, IL10RA, IL12RB1, IL1B, IL1RN, IL27RA, IL2RB, IL2RG, IL7R, IRF1, IRF4, ITGAL, ITGB2, ITK, JAK3, LAX1, LCK, LCP2, LTB, MAP4K1, MYB (includes EG:4602), NCAPH2, PRF1, PSMB9, PTPN6, PTPN22, PTPRC, RAC2, RASSF5, RHOH, RUNX3, SH2D1A, SH2D2A, SIT1, SLAMF1, SPIB, STAT1, STAT4, TCL1A, TNFRSF25, TNFRSF1B, TNFSF13B, TRAT1, VAV1, WAS, XCL1, ZAP70                                                                                                  | 84 |  |
| Hematopoiesis | development     | development of thymocytes             | 3,15E-11 | CD3D, CD3E, CD3G, IL2RB, IL2RG, IL7R, IRF1, LAX1, LCP2, MYB (includes EG:4602), PTPRC, SIT1, SPIB, TRAT1, ZAP70                                                                                                                                                                                                                                                                                                                                                                                                                                                                                                                                                                                              | 15 |  |
| Hematopoiesis | development     | development of helper T lymphocytes   | 1,08E-08 | CASP1, CD28, CD86, ICOS, IL12RB1, IL1B, IRF1, ITGB2, ITK, STAT1, STAT4                                                                                                                                                                                                                                                                                                                                                                                                                                                                                                                                                                                                                                       | 11 |  |
| Hematopoiesis | development     | development of B lymphocytes          | 1,15E-07 | ADA, BTK, CD19, CD69, CR2, IGHM, IL2RG, IL7R, JAK3, MYB (includes EG:4602), POU2AF1, TNFSF13B, VAV1                                                                                                                                                                                                                                                                                                                                                                                                                                                                                                                                                                                                          | 13 |  |
| Hematopoiesis | hematopoiesis   | hematopoiesis                         | 2,08E-43 | ADA, BCL11B, BCL2A1, BTK, CASP1, CCL3, CCL4, CCL5, CCL19, CCR2, CCR5, CCR7, CD2, CD4, CD6, CD14, CD19, CD27, CD28, CD69, CD86, CD247, CD1D, CD3D, CD3E, CD3G, CD79A, CD8A, CIITA, CLEC10A, CR2, CSF1R, CSF2RB, CSF3R, CXCL11, DEF6, DOCK2, EOMES, FCER1G, GZMA, GZMB, HLA-DOA, HLA-DQA1, HLA-DQB1, ICOS, IDO1, IGHG1, IGHM, IKZF1, IL10RA, IL12RB1, IL1B, IL1RN, IL27RA, IL2RB, IL2RG, IL7R, IRF1, IRF4, ITGAL, ITGB2, ITK, JAK3, LAX1, LCK, LCN2, LCP2, LTB, LTF, MAP4K1, MYB (includes EG:4602), NCAPH2, POU2AF1, PRF1, PSMB9, PTPN6, PTPN22, PTPRC, RAC2, RASSF5, RHOH, RUNX3, SH2D1A, SH2D2A, SIT1, SLAMF1, SPIB, STAT1, STAT4, TCL1A, TLR7, TNFRSF25, TNFRSF1B, TNFSF13B, TRAT1, VAV1, WAS, XCL1, ZAP70 | 99 |  |
| Hematopoiesis | differentiation | differentiation of leukocytes         | 2,83E-33 | ADA, BCL2A1, CCL2, CCL3, CCL11, CCL19, CD2, CD4, CD14, CD27, CD28, CD86, CD1D, CD300A, CD3D, CD3E, CD79A, CD8A, CR2, CSF1R, CSF2RB, CSF3R, DEF6, DOCK2, HLA-DOA, HLA-DQA1, ICOS, IGHG1, IGHM, IKZF1, IL12RB1, IL1B, IL1RN, IL27RA, IL2RB, IL2RG, IL7R, IRF1, IRF4, IRF7, ITGAL, ITGB2, ITK, JAK3, LCK, LCP2, MYB (includes EG:4602), NCAPH2, POU2AF1,                                                                                                                                                                                                                                                                                                                                                        | 69 |  |

|               |                 |                                           |          |                                                                                                                                                                                                                                                                                                                                                                                                                                                         |    |
|---------------|-----------------|-------------------------------------------|----------|---------------------------------------------------------------------------------------------------------------------------------------------------------------------------------------------------------------------------------------------------------------------------------------------------------------------------------------------------------------------------------------------------------------------------------------------------------|----|
|               |                 |                                           |          | PTPN6, PTPN22, PTPRC, RASSF5, RGS10, RHOH, SH2D1A, SIT1, SLAMF1, SPIB, STAT1, STAT4, TIMP1, TLR7, TNFRSF25, TNFSF13B, TRAT1, VAV1, WAS, ZAP70                                                                                                                                                                                                                                                                                                           |    |
| Hematopoiesis | differentiation | differentiation of mononuclear leukocytes | 4,25E-33 | ADA, BCL2A1, CCL2, CCL3, CCL19, CD2, CD4, CD14, CD27, CD28, CD86, CD1D, CD3D, CD3E, CD79A, CD8A, CR2, CSF1R, DEF6, DOCK2, HLA-DOA, HLA-DQA1, ICOS, IGHG1, IGHM, IKZF1, IL12RB1, IL1B, IL1RN, IL27RA, IL2RB, IL2RG, IL7R, IRF1, IRF4, IRF7, ITGAL, ITGB2, ITK, JAK3, LCK, LCP2, MYB (includes EG:4602), NCAPH2, POU2AF1, PTPN6, PTPN22, PTPRC, RASSF5, RHOH, SH2D1A, SIT1, SLAMF1, SPIB, STAT1, STAT4, TLR7, TNFRSF25, TNFSF13B, TRAT1, VAV1, WAS, ZAP70 | 63 |
| Hematopoiesis | differentiation | differentiation of lymphocytes            | 1,58E-32 | ADA, BCL2A1, CCL3, CCL19, CD2, CD4, CD14, CD27, CD28, CD86, CD1D, CD3D, CD3E, CD79A, CD8A, CR2, DEF6, DOCK2, HLA-DOA, HLA-DQA1, ICOS, IGHG1, IGHM, IKZF1, IL12RB1, IL1B, IL1RN, IL27RA, IL2RB, IL2RG, IL7R, IRF1, IRF4, ITGAL, ITGB2, ITK, JAK3, LCK, LCP2, MYB (includes EG:4602), NCAPH2, POU2AF1, PTPN6, PTPN22, PTPRC, RASSF5, RHOH, SH2D1A, SIT1, SLAMF1, SPIB, STAT1, STAT4, TLR7, TNFRSF25, TNFSF13B, TRAT1, VAV1, WAS, ZAP70                    | 60 |
| Hematopoiesis | differentiation | differentiation of T lymphocytes          | 3,22E-24 | ADA, BCL2A1, CCL3, CCL19, CD2, CD4, CD28, CD86, CD1D, CD3E, CD8A, DEF6, HLA-DOA, HLA-DQA1, ICOS, IGHG1, IKZF1, IL12RB1, IL1B, IL1RN, IL27RA, IL2RB, IL2RG, IL7R, IRF1, IRF4, ITGAL, ITGB2, ITK, JAK3, LCK, LCP2, MYB (includes EG:4602), NCAPH2, PTPN22, PTPRC, RASSF5, SH2D1A, SLAMF1, STAT1, STAT4, TNFSF13B, VAV1, WAS, ZAP70                                                                                                                        | 45 |
| Hematopoiesis | differentiation | differentiation of helper T lymphocytes   | 9,77E-11 | CCL3, CD28, CD86, ICOS, IGHG1, IL12RB1, IL1B, IL27RA, IL2RB, IRF1, ITGAL, ITGB2, ITK, JAK3, SH2D1A, STAT1, STAT4, TNFSF13B, VAV1                                                                                                                                                                                                                                                                                                                        | 19 |
| Hematopoiesis | differentiation | differentiation of B lymphocytes          | 2,03E-08 | CD14, CD27, CD79A, CR2, ICOS, IGHM, IKZF1, IL2RB, IL2RG, IL7R, IRF4, POU2AF1, PTPN6, PTPRC, SPIB, TLR7, TNFSF13B                                                                                                                                                                                                                                                                                                                                        | 17 |
| Hematopoiesis | differentiation | differentiation of Th2 cells              | 6,00E-08 | CD28, CD86, ICOS, IGHG1, IRF1, ITK, JAK3, SH2D1A, STAT1, STAT4, VAV1                                                                                                                                                                                                                                                                                                                                                                                    | 11 |
| Hematopoiesis | differentiation | differentiation of thymocytes             | 6,97E-08 | CD2, CD28, CD86, CD3E, IKZF1, IL2RG, LCP2, MYB (includes EG:4602), WAS, ZAP70                                                                                                                                                                                                                                                                                                                                                                           | 10 |
| Hematopoiesis | cell death      | cell death of T lymphocytes               | 7,64E-22 | ADA, BCL2A1, CASP1, CCL3, CCL4, CCL5, CCL19, CCR5, CD2, CD4, CD27, CD28, CD247, CD3E, CIITA, CLEC10A, DEF6, EOMES, GZMA, GZMB, ICOS, IDO1, IGHM, IL1B, IL2RG, IL7R, ITK, JAK3, LCK, MAP4K1, PRF1, PTPRC, RAC2, SH2D2A, STAT1, TCL1A, TNFRSF25, TNFRSF1B, WAS, XCL1                                                                                                                                                                                      | 40 |
| Hematopoiesis | migration       | migration of granulocytes                 | 2,47E-21 | C3, CCL3, CCL4, CCL5, CCL11, CXCL1, CXCL2, CXCL6, CXCL9, CXCL10, CXCL11, DARC, FGR, FPR1, HCK, ICAM2, IL16, IL1B, ITGAL, ITGAX, ITGB2, LSP1, LTF, MMP7, PIK3R5, S100A8, SAA1, SELL, SLPI                                                                                                                                                                                                                                                                | 29 |
| Hematopoiesis | migration       | migration of neutrophils                  | 1,41E-14 | CCL3, CCL5, CXCL1, CXCL2, CXCL6, DARC, FGR, FPR1, HCK, IL1B, ITGAL, ITGAX, ITGB2, LSP1, MMP7, PIK3R5, S100A8, SAA1, SELL, SLPI                                                                                                                                                                                                                                                                                                                          | 20 |
| Hematopoiesis | migration       | migration of eosinophils                  | 2,90E-14 | C3, CCL4, CCL5, CCL11, CXCL2, CXCL9, CXCL10, CXCL11, ICAM2, IL16, IL1B, ITGAL, ITGB2, LTF                                                                                                                                                                                                                                                                                                                                                               | 14 |
| Hematopoiesis | apoptosis       | apoptosis of T lymphocytes                | 1,06E-17 | ADA, BCL2A1, CASP1, CCL3, CCL4, CCL5, CCR5, CD2, CD4, CD27, CD28, CD247, CD3E, CIITA, GZMA, GZMB, ICOS, IL1B, IL2RG, IL7R, ITK, JAK3, LCK, MAP4K1, PRF1, PTPRC, RAC2, STAT1, TCL1A, TNFRSF25, TNFRSF1B, WAS, XCL1                                                                                                                                                                                                                                       | 33 |
| Hematopoiesis | selection       | selection of T lymphocytes                | 3,41E-16 | CD4, CD28, CD1D, CD3D, CD3E, DOCK2, HLA-DOA, ITK, PTPRC, RHOH, SIT1, TNFRSF25, TRAT1, VAV1, ZAP70                                                                                                                                                                                                                                                                                                                                                       | 15 |
| Hematopoiesis | selection       | selection of thymocytes                   | 1,11E-08 | CD28, HLA-DOA, ITK, RHOH, SIT1, TNFRSF25, TRAT1                                                                                                                                                                                                                                                                                                                                                                                                         | 7  |
| Hematopoiesis | cell movement   | cell movement of bone marrow cells        | 1,97E-11 | CCL2, CCL3, CCL4, CCL11, CXCL2, CXCL9, CXCL10, FPR1, ICAM2, IL1RN, ITGAL, ITGAX, ITGB2, LSP1, SLPI                                                                                                                                                                                                                                                                                                                                                      | 15 |
| Hematopoiesis | generation      | generation of T lymphocytes               | 2,01E-10 | CD4, CD28, CD86, HLA-DQB1, ICOS, IL10RA, IL12RB1, IL27RA, IL2RG, ITK, JAK3, PSMB9, STAT4, TNFSF13B                                                                                                                                                                                                                                                                                                                                                      | 14 |
| Hematopoiesis | transmigration  | transmigration of granulocyte             | 2,32E-09 | CCL11, CXCL2, CXCL9, CXCL10, FPR1, ICAM2, ITGAL, ITGAX, ITGB2, LSP1, SLPI                                                                                                                                                                                                                                                                                                                                                                               | 11 |

|                   |                               |                                                |          |                                                                                                                                                                                                                                                                                                                                                                                                                                                                                                                                                                                                                                                            |    |
|-------------------|-------------------------------|------------------------------------------------|----------|------------------------------------------------------------------------------------------------------------------------------------------------------------------------------------------------------------------------------------------------------------------------------------------------------------------------------------------------------------------------------------------------------------------------------------------------------------------------------------------------------------------------------------------------------------------------------------------------------------------------------------------------------------|----|
| Hematopoiesis     | positive selection            | positive selection of lymphocytes              | 5,69E-09 | CD4, ITK, RHOH, SIT1, TRAT1, VAV1, ZAP70                                                                                                                                                                                                                                                                                                                                                                                                                                                                                                                                                                                                                   | 7  |
| Hematopoiesis     | positive selection            | positive selection of T lymphocytes            | 6,77E-08 | CD4, ITK, RHOH, SIT1, TRAT1, VAV1                                                                                                                                                                                                                                                                                                                                                                                                                                                                                                                                                                                                                          | 6  |
| Hematopoiesis     | polarization                  | polarization of T lymphocytes                  | 1,08E-08 | CCL19, CD28, ICOS, IL12RB1, IL1B, IRF4, LCK, RASSF5, SLAMF1, STAT4, VAV1                                                                                                                                                                                                                                                                                                                                                                                                                                                                                                                                                                                   | 11 |
| Hematopoiesis     | proliferation                 | proliferation of thymocytes                    | 1,09E-08 | CD2, CD28, CD3E, IL1B, IL2RG, ITK, JAK3, LCP2, MYB (includes EG:4602), PTPN6, TNFRSF1B, WAS, ZAP70                                                                                                                                                                                                                                                                                                                                                                                                                                                                                                                                                         | 13 |
| Hematopoiesis     | activation-induced cell death | activation-induced cell death of T lymphocytes | 1,83E-08 | CCR5, CD28, CD3E, CIITA, ITK, MAP4K1, PRF1, RAC2, STAT1                                                                                                                                                                                                                                                                                                                                                                                                                                                                                                                                                                                                    | 9  |
| Cellular Movement | cell movement                 | cell movement of blood cells                   | 1,56E-44 | C2, C3, CASP1, CCL2, CCL3, CCL4, CCL5, CCL11, CCL18, CCL19, CCL20, CCL21, CCR2, CCR5, CCR7, CD2, CD4, CD14, CD28, CD48, CD86, CIITA, CORO1A, CSF1R, CSF3R, CTSS, CXCL1, CXCL2, CXCL6, CXCL9, CXCL10, CXCL11, CXCL13, CXCR3, CYSLTR1, DARC, FCER1G, FGB, FGR, FPR1, GNLY, HCK, ICAM2, ICOS, IGHG1, IL16, IL12RB1, IL1B, IL1RN, IL27RA, IL2RB, ITGAL, ITGAX, ITGB2, ITK, JAK3, LSP1, LTB, NCF1, PLA2G7, POU2AF1, PRF1, PRKCB, PTPN6, PTPRC, RAC2, RGS1, RUNX3, S100A8, SAA1, SELL, SELPLG, SERPINA3, SLPI, STAT1, TAC1, TCIRG1, TIMP1, TNFRSF1B, UCP2, WAS, XCL1, ZC3H12A                                                                                    | 83 |
| Cellular Movement | cell movement                 | cell movement of leukocytes                    | 2,18E-40 | C2, C3, CASP1, CCL2, CCL3, CCL4, CCL5, CCL11, CCL18, CCL19, CCL20, CCL21, CCR2, CCR5, CCR7, CD2, CD4, CD14, CD28, CD48, CD86, CORO1A, CSF1R, CSF3R, CTSS, CXCL1, CXCL2, CXCL6, CXCL9, CXCL10, CXCL11, CXCL13, CXCR3, CYSLTR1, DARC, FCER1G, FGB, FGR, FPR1, GNLY, HCK, ICAM2, IGHG1, IL16, IL12RB1, IL1B, IL1RN, IL27RA, IL2RB, ITGAL, ITGAX, ITGB2, ITK, LSP1, NCF1, PLA2G7, POU2AF1, PRF1, PRKCB, PTPN6, PTPRC, RAC2, RGS1, RUNX3, S100A8, SAA1, SELL, SELPLG, SERPINA3, SLPI, STAT1, TAC1, TIMP1, TNFRSF1B, UCP2, WAS, XCL1, ZC3H12A                                                                                                                    | 78 |
| Cellular Movement | cell movement                 | cell movement of normal cells                  | 2,54E-38 | C2, C3, CASP1, CCL2, CCL3, CCL4, CCL5, CCL11, CCL18, CCL19, CCL20, CCL21, CCR2, CCR5, CCR7, CD2, CD4, CD14, CD28, CD48, CD86, CIITA, CORO1A, CSF1R, CSF3R, CTSS, CXCL1, CXCL2, CXCL6, CXCL9, CXCL10, CXCL11, CXCL13, CXCR3, CYSLTR1, DARC, DGKA, FCER1G, FGB, FGR, FPR1, GNLY, HCK, ICAM2, ICOS, IGHG1, IL16, IL12RB1, IL1B, IL1RN, IL27RA, IL2RB, ITGAL, ITGAX, ITGB2, ITK, JAK3, LCP2, LSP1, LTB, NCF1, PLA2G7, POU2AF1, PRF1, PRKCB, PTPN6, PTPRC, RAC2, RGS1, RUNX3, S100A8, SAA1, SELL, SELPLG, SERPINA3, SLPI, STAT1, TAC1, TCIRG1, TIMP1, TNFRSF1B, UCP2, WAS, XCL1, ZC3H12A                                                                        | 85 |
| Cellular Movement | cell movement                 | cell movement of eukaryotic cells              | 1,88E-33 | C2, C3, CASP1, CCL2, CCL3, CCL4, CCL5, CCL11, CCL18, CCL19, CCL20, CCL21, CCR2, CCR5, CCR7, CD2, CD4, CD14, CD28, CD48, CD69, CD86, CIITA, CORO1A, CSF1R, CSF3R, CTSS, CXCL1, CXCL2, CXCL6, CXCL9, CXCL10, CXCL11, CXCL13, CXCR3, CYSLTR1, DARC, DGKA, FCER1G, FGB, FGR, FPR1, GNLY, HCK, ICAM2, ICOS, IGHG1, IL16, IL12RB1, IL1B, IL1RN, IL27RA, IL2RB, ITGAL, ITGAX, ITGB2, ITK, JAK3, LCK, LCP1, LCP2, LSP1, LTB, NCF1, PCDH10, PLA2G7, POU2AF1, PRF1, PRKCB, PTPN6, PTPRC, RAC2, RGS1, RUNX3, S100A8, SAA1, SELL, SELPLG, SERPINA3, SLPI, STAT1, TAC1, TCIRG1, TIMP1, TNFRSF1B, UCP2, WAS, XCL1, ZC3H12A                                               | 89 |
| Cellular Movement | cell movement                 | cell movement                                  | 1,84E-31 | C2, C3, CASP1, CCL2, CCL3, CCL4, CCL5, CCL11, CCL18, CCL19, CCL20, CCL21, CCR2, CCR5, CCR7, CCR2, CD2, CD4, CD14, CD28, CD48, CD69, CD86, CIITA, CORO1A, CSF1R, CSF3R, CTSS, CXCL1, CXCL2, CXCL6, CXCL9, CXCL10, CXCL11, CXCL13, CXCR3, CXCR6 (includes EG:10663), CYSLTR1, DARC, DGKA, DOCK2, FCER1G, FGB, FGR, FPR1, FPR3, GNLY, HCK, ICAM2, ICOS, IGHG1, IL16, IL12RB1, IL1B, IL1RN, IL27RA, IL2RB, ITGAL, ITGAX, ITGB2, ITK, JAK3, LCK, LCP1, LCP2, LSP1, LTB, NCF1, PCDH10, PLA2G7, POU2AF1, PRF1, PRKCB, PTPN6, PTPRC, RAC2, RGS1, RUNX3, S100A8, SAA1, SELL, SELPLG, SERPINA3, SLPI, STAT1, TAC1, TCIRG1, TIMP1, TNFRSF1B, UCP2, WAS, XCL1, ZC3H12A | 93 |
| Cellular Movement | cell movement                 | cell movement of lymphatic system cells        | 1,18E-29 | C2, C3, CASP1, CCL2, CCL3, CCL4, CCL5, CCL11, CCL21, CCR2, CD2, CD28, CD48, CORO1A, CSF3R, CXCL1, CXCL2, CXCL6, CXCL9, CXCL10, CXCR3, FCER1G, FGR, FPR1, HCK, ICAM2, IL1B, IL1RN, IL27RA, IL2RB, ITGAL, ITGAX, ITGB2, ITK, LCP2, LSP1, NCF1, PLA2G7, PTPN6, PTPRC, RAC2, RUNX3, S100A8, SELL, SELPLG, SLPI, TAC1, TNFRSF1B, WAS, XCL1                                                                                                                                                                                                                                                                                                                      | 50 |

|                   |               |                                           |          |                                                                                                                                                                                                                                                                                                                                 |    |
|-------------------|---------------|-------------------------------------------|----------|---------------------------------------------------------------------------------------------------------------------------------------------------------------------------------------------------------------------------------------------------------------------------------------------------------------------------------|----|
| Cellular Movement | cell movement | cell movement of myeloid cells            | 2,53E-29 | C2, C3, CASP1, CCL2, CCL3, CCL4, CCL5, CCL11, CCL21, CCR2, CD2, CD28, CD48, CORO1A, CSF3R, CXCL1, CXCL2, CXCL6, CXCL9, CXCL10, CXCR3, FCER1G, FGR, FPR1, HCK, ICAM2, IL1B, IL1RN, IL27RA, IL2RB, ITGAL, ITGAX, ITGB2, ITK, LSP1, NCF1, PLA2G7, PTPN6, PTPRC, RAC2, RUNX3, S100A8, SELL, SELPLG, SLPI, TAC1, TNFRSF1B, WAS, XCL1 | 49 |
| Cellular Movement | cell movement | cell movement of granulocytes             | 2,19E-28 | C2, C3, CASP1, CCL2, CCL3, CCL4, CCL5, CCL11, CCL21, CCR2, CD2, CD28, CD48, CORO1A, CSF3R, CXCL1, CXCL2, CXCL6, CXCL9, CXCL10, CXCR3, FCER1G, FGR, FPR1, HCK, ICAM2, IL1B, IL1RN, IL27RA, IL2RB, ITGAL, ITGAX, ITGB2, ITK, LSP1, NCF1, PLA2G7, PTPN6, RAC2, RUNX3, S100A8, SELL, SELPLG, SLPI, TAC1, TNFRSF1B, WAS, XCL1        | 48 |
| Cellular Movement | cell movement | cell movement of mononuclear leukocytes   | 1,57E-26 | C3, CCL2, CCL3, CCL4, CCL5, CCL11, CCL18, CCL19, CCL20, CCL21, CCR2, CCR5, CCR7, CD28, CD86, CTSS, CXCL9, CXCL10, CXCL11, CXCL13, CXCR3, CYSLTR1, DARC, FPR1, GNLY, IGHG1, IL16, IL1B, ITGAL, ITGAX, ITGB2, ITK, POU2AF1, PRF1, PRKCB, RAC2, RGS1, SAA1, SELL, SELPLG, SERPINA3, TAC1, TIMP1, UCP2, WAS, XCL1, ZC3H12A          | 47 |
| Cellular Movement | cell movement | cell movement of lymphocytes              | 5,86E-25 | C3, CCL2, CCL3, CCL4, CCL5, CCL11, CCL18, CCL19, CCL20, CCL21, CCR2, CCR5, CCR7, CD28, CD86, CXCL9, CXCL10, CXCL11, CXCL13, CXCR3, CYSLTR1, DARC, GNLY, IGHG1, IL16, IL1B, ITGB2, ITK, POU2AF1, PRF1, RAC2, RGS1, SAA1, SELL, SELPLG, TAC1, TIMP1, UCP2, WAS, XCL1, ZC3H12A                                                     | 41 |
| Cellular Movement | cell movement | cell movement of phagocytes               | 1,13E-24 | C2, C3, CASP1, CCL2, CCL3, CCL4, CCL5, CCL21, CCR2, CCR5, CD28, CORO1A, CSF1R, CSF3R, CXCL1, CXCL2, CXCL6, CXCL9, CXCL10, CXCR3, DARC, FCER1G, FGR, FPR1, HCK, IL16, IL12RB1, IL1B, IL1RN, ITGAL, ITGAX, ITGB2, LSP1, NCF1, PTPN6, RAC2, S100A8, SAA1, SELL, SELPLG, SLPI, TAC1, TNFRSF1B, WAS, XCL1                            | 45 |
| Cellular Movement | cell movement | cell movement of neutrophils              | 4,52E-22 | C2, C3, CASP1, CCL2, CCL3, CCL4, CCL5, CCL21, CCR2, CD28, CORO1A, CSF3R, CXCL1, CXCL2, CXCL6, CXCL10, FCER1G, FGR, FPR1, HCK, IL1B, IL1RN, ITGAL, ITGAX, ITGB2, LSP1, NCF1, PTPN6, RAC2, S100A8, SELL, SELPLG, SLPI, TAC1, TNFRSF1B, WAS, XCL1                                                                                  | 37 |
| Cellular Movement | cell movement | cell movement of T lymphocytes            | 1,37E-18 | C3, CCL2, CCL3, CCL4, CCL5, CCL11, CCL18, CCL19, CCL20, CCL21, CCR2, CCR5, CCR7, CD28, CD86, CXCL9, CXCL10, CXCL11, CYSLTR1, DARC, GNLY, IL16, IL1B, ITGB2, ITK, PRF1, SELL, SELPLG, XCL1                                                                                                                                       | 29 |
| Cellular Movement | cell movement | cell movement of antigen presenting cells | 2,47E-18 | C3, CCL2, CCL3, CCL4, CCL5, CCL11, CCL19, CCL20, CCL21, CCR2, CCR5, CCR7, CD86, CSF1R, CXCL9, CXCL10, CXCR3, DARC, FPR1, GNLY, ICAM2, IL16, IL12RB1, IL1B, IL1RN, ITGB2, RAC2, SAA1, SELL, TAC1                                                                                                                                 | 30 |
| Cellular Movement | cell movement | cell movement of eosinophils              | 3,31E-17 | C3, CCL2, CCL3, CCL5, CCL11, CCL21, CD2, CD48, CXCL9, CXCL10, CXCR3, FPR1, ICAM2, IL1B, IL27RA, IL2RB, ITGAL, ITGB2, ITK, PLA2G7, RUNX3, WAS                                                                                                                                                                                    | 22 |
| Cellular Movement | cell movement | cell movement of dendritic cells          | 1,41E-12 | CCL2, CCL3, CCL4, CCL5, CCL11, CCL19, CCL20, CCL21, CCR7, CD86, FPR1, GNLY, ICAM2, IL16, IL1B, TAC1                                                                                                                                                                                                                             | 16 |
| Cellular Movement | cell movement | cell movement of memory T lymphocytes     | 1,68E-12 | CCL2, CCL5, CCL19, CCL21, CCR7, CD28, CXCL9, CXCL11, GNLY, ITGB2                                                                                                                                                                                                                                                                | 10 |
| Cellular Movement | cell movement | cell movement of macrophages              | 1,01E-11 | C3, CCL2, CCL3, CCL4, CCL5, CCR2, CCR5, CSF1R, CXCL9, CXCL10, CXCR3, DARC, IL16, IL12RB1, IL1B, IL1RN, ITGB2, RAC2, SAA1, SELL                                                                                                                                                                                                  | 20 |
| Cellular Movement | cell movement | cell movement of bone marrow cells        | 1,97E-11 | CCL2, CCL3, CCL4, CCL11, CXCL2, CXCL9, CXCL10, FPR1, ICAM2, IL1RN, ITGAL, ITGAX, ITGB2, LSP1, SLPI                                                                                                                                                                                                                              | 15 |
| Cellular Movement | cell movement | cell movement of B lymphocytes            | 1,39E-10 | CCL18, CCL19, CCL20, CCL21, CCR2, CXCL9, CXCL13, POU2AF1, RAC2, RGS1, SELPLG, ZC3H12A                                                                                                                                                                                                                                           | 12 |
| Cellular          | cell          | cell                                      | 1,59E-10 | C3, CCL2, CCL3, CCL4, CCL5, CCL11, CCL19, CCL20, CCL21, CCR5, CCR7, CD28,                                                                                                                                                                                                                                                       | 32 |



|                                  |                              |                                             |          |                                                                                                                                                                                                                                                                                                                                                                                                                                                                                                                                                                                                                                                                         |    |
|----------------------------------|------------------------------|---------------------------------------------|----------|-------------------------------------------------------------------------------------------------------------------------------------------------------------------------------------------------------------------------------------------------------------------------------------------------------------------------------------------------------------------------------------------------------------------------------------------------------------------------------------------------------------------------------------------------------------------------------------------------------------------------------------------------------------------------|----|
| Movement<br>Cellular<br>Movement | movement<br>cell<br>movement | movement<br>of cell lines<br>cell           | 2,62E-10 | CD69, CSF1R, CXCL1, CXCL9, CXCL10, CXCL11, CXCL13, CXCR3, DARC, DGKA, FPR1, IL12RB1, ITGB2, LCK, LCP1, PCDH10, RGS1, SELL, SELPLG, WAS, CCL2, CCL3, CCL4, CCL20, CCR2, CCR5, CIITA, ICOS, JAK3, LTB, TCIRG1                                                                                                                                                                                                                                                                                                                                                                                                                                                             | 11 |
| Cellular<br>Movement             | cell<br>movement             | movement<br>of mononuclear<br>cells         | 1,72E-09 | CCL2, CCL3, CCL4, CCL5, CCL11, CCR2, CTSS, CXCL9, CXCL10, FPR1, GNLY, IL1B, ITGAL, ITGAX, ITGB2, PRKCB, SERPINA3                                                                                                                                                                                                                                                                                                                                                                                                                                                                                                                                                        | 17 |
| Cellular<br>Movement             | cell<br>movement             | movement<br>of monocytes<br>cell            | 1,28E-08 | CCL18, CCL19, CCL20, CCL21, CCR7, SELL                                                                                                                                                                                                                                                                                                                                                                                                                                                                                                                                                                                                                                  | 6  |
| Cellular<br>Movement             | cell<br>movement             | movement<br>of naive<br>lymphocytes<br>cell | 1,46E-08 | C3, CCL3, CCL5, CCL19, CCL21, CCR7, CXCL11, CXCL13, CXCR3, ITGB2, RGS1, WAS                                                                                                                                                                                                                                                                                                                                                                                                                                                                                                                                                                                             | 12 |
| Cellular<br>Movement             | cell<br>movement             | movement<br>of leukocyte<br>cell lines      | 6,19E-08 | CCL2, CCL4, CCL5, CCL11, CCR5, CD69, DARC, SELL, SELPLG                                                                                                                                                                                                                                                                                                                                                                                                                                                                                                                                                                                                                 | 9  |
| Cellular<br>Movement             | migration                    | migration of<br>leukocytes                  | 8,60E-44 | ALOX5, C3, CCL2, CCL3, CCL4, CCL5, CCL11, CCL18, CCL19, CCL20, CCL21, CCR2, CCR5, CCR7, CD2, CD4, CD22, CD28, CD48, CD69, CD86, CD247, CD3E, CD8A, CORO1A, CSF1R, CSF3R, CTSS, CXCL1, CXCL2, CXCL6, CXCL9, CXCL10, CXCL11, CXCL13, CXCR3, CYSLTR1, CYTIP, DARC, DOCK2, FCER1G, FGR, FPR1, FYB, GNLY, HCK, ICAM2, ICOS, IL16, IL10RA, IL12RB1, IL1B, ITGAL, ITGAX, ITGB2, ITK, LCK, LSP1, LTF, MMP7, PIK3R5, PRF1, PRKCB, PTPN6, PTPRC, RAC2, RASSF5, RGS1, RUNX3, S100A8, SAA1, SELL, SELPLG, SERPINA3, SLPI, TAC1, TIMP1, TNFRSF1B, TNFSF13B, WAS, XCL1                                                                                                                | 81 |
| Cellular<br>Movement             | migration                    | migration of<br>mononuclear<br>leukocytes   | 8,88E-33 | ALOX5, C3, CCL2, CCL3, CCL4, CCL5, CCL11, CCL18, CCL19, CCL20, CCL21, CCR2, CCR5, CCR7, CD2, CD4, CD22, CD28, CD48, CD69, CD86, CD247, CD3E, CD8A, CTSS, CXCL9, CXCL10, CXCL11, CXCL13, CXCR3, CYSLTR1, CYTIP, DARC, DOCK2, FYB, GNLY, ICAM2, ICOS, IL16, IL1B, ITGAL, ITGAX, ITGB2, ITK, LCK, PRF1, RASSF5, SELL, SELPLG, TAC1, TIMP1, TNFRSF1B, TNFSF13B, WAS, XCL1                                                                                                                                                                                                                                                                                                   | 55 |
| Cellular<br>Movement             | migration                    | Lymphocyte<br>migration                     | 1,14E-32 | ALOX5, C3, CCL2, CCL3, CCL4, CCL5, CCL11, CCL18, CCL19, CCL20, CCL21, CCR2, CCR5, CCR7, CD2, CD4, CD22, CD28, CD48, CD69, CD86, CD247, CD3E, CD8A, CXCL9, CXCL10, CXCL11, CXCL13, CXCR3, CYSLTR1, CYTIP, DARC, DOCK2, FYB, GNLY, ICAM2, ICOS, IL16, IL1B, ITGAL, ITGB2, ITK, LCK, PRF1, RASSF5, SELL, SELPLG, TAC1, TIMP1, TNFRSF1B, TNFSF13B, WAS, XCL1                                                                                                                                                                                                                                                                                                                | 53 |
| Cellular<br>Movement             | migration                    | migration of<br>normal cells                | 2,10E-28 | ALOX5, C3, CCL2, CCL3, CCL4, CCL5, CCL11, CCL18, CCL19, CCL20, CCL21, CCR2, CCR5, CCR7, CD2, CD4, CD22, CD28, CD48, CD69, CD86, CD247, CD3E, CD8A, CORO1A, CSF1R, CSF3R, CTSS, CXCL1, CXCL2, CXCL6, CXCL9, CXCL10, CXCL11, CXCL13, CXCR3, CYSLTR1, CYTIP, DARC, DOCK2, FCER1G, FGR, FPR1, FYB, GNLY, GRN, HCK, ICAM2, ICOS, IGHG1, IL16, IL10RA, IL12RB1, IL1B, ITGAL, ITGAX, ITGB2, ITK, LCK, LSP1, LTF, MMP7, NCF1, PIK3R5, PRF1, PRKCB, PTPN6, PTPRC, RAC2, RASSF5, RGS1, RUNX3, S100A8, SAA1, SELL, SELPLG, SERPINA3, SLPI, ST8SIA4, TAC1, TIMP1, TNFRSF1B, TNFSF13B, WARS, WAS, XCL1                                                                               | 86 |
| Cellular<br>Movement             | migration                    | T cell<br>migration                         | 1,94E-25 | ALOX5, C3, CCL2, CCL3, CCL4, CCL5, CCL11, CCL18, CCL19, CCL20, CCL21, CCR2, CCR5, CCR7, CD4, CD28, CD69, CD86, CXCL9, CXCL10, CXCL11, CXCL13, CXCR3, CYSLTR1, DARC, DOCK2, FYB, GNLY, ICOS, IL16, IL1B, ITGB2, ITK, LCK, PRF1, SELL, SELPLG, WAS, XCL1                                                                                                                                                                                                                                                                                                                                                                                                                  | 39 |
| Cellular<br>Movement             | migration                    | migration of<br>cells                       | 7,39E-25 | ALOX5, C3, CCL2, CCL3, CCL4, CCL5, CCL11, CCL18, CCL19, CCL20, CCL21, CCR2, CCR5, CCR7, CD2, CD4, CD22, CD28, CD48, CD69, CD86, CD247, CD3E, CD8A, CORO1A, CSF1R, CSF2RB, CSF3R, CTSS, CXCL1, CXCL2, CXCL6, CXCL9, CXCL10, CXCL11, CXCL13, CXCR3, CYSLTR1, CYTIP, DARC, DOCK2, FCER1G, FGR, FPR1, FPR3, FYB, GNLY, GRN, GZMB, HCK, ICAM2, ICOS, IGHG1, IL16, IL10RA, IL12RB1, IL1B, ITGAL, ITGAX, ITGB2, ITK, KLRK1, LCK, LCN2, LSP1, LTF, MMP7, MYO1F, NCF1, PIK3R5, PRF1, PRKCB, PTPN6, PTPRC, PTTG1, RAC2, RASSF5, RGS1, RUNX3, S100A8, SAA1, SELL, SELPLG, SERPINA3, SH2D2A, SLPI, ST8SIA4, STAT1, TAC1, TIMP1, TNFRSF25, TNFRSF1B, TNFSF13B, WARS, WAS, XCL1, XCL2 | 97 |

|                   |           |                                          |          |                                                                                                                                                                                                                                                                                                                                                                                                                                                                                                                                                                                                                                               |    |
|-------------------|-----------|------------------------------------------|----------|-----------------------------------------------------------------------------------------------------------------------------------------------------------------------------------------------------------------------------------------------------------------------------------------------------------------------------------------------------------------------------------------------------------------------------------------------------------------------------------------------------------------------------------------------------------------------------------------------------------------------------------------------|----|
| Cellular Movement | migration | migration of eukaryotic cells            | 1,59E-24 | ALOX5, C3, CCL2, CCL3, CCL4, CCL5, CCL11, CCL18, CCL19, CCL20, CCL21, CCR2, CCR5, CCR7, CD2, CD4, CD22, CD28, CD48, CD69, CD86, CD247, CD3E, CD8A, CORO1A, CSF1R, CSF2RB, CSF3R, CTSS, CXCL1, CXCL2, CXCL6, CXCL9, CXCL10, CXCL11, CXCL13, CXCR3, CYSLTR1, CYTIP, DARC, DOCK2, FCER1G, FGR, FPR1, FPR3, FYB, GNLY, GRN, GZMB, HCK, ICAM2, ICOS, IGHG1, IL16, IL10RA, IL12RB1, IL1B, ITGAL, ITGAX, ITGB2, ITK, KLRK1, LCK, LSP1, LTF, MMP7, NCF1, PIK3R5, PRF1, PRKCB, PTPN6, PTPRC, PTTG1, RAC2, RASSF5, RGS1, RUNX3, S100A8, SAA1, SELL, SELPLG, SERPINA3, SH2D2A, SLPI, ST8SIA4, TAC1, TIMP1, TNFRSF25, TNFRSF1B, TNFSF13B, WARS, WAS, XCL1 | 93 |
| Cellular Movement | migration | migration of granulocytes                | 2,47E-21 | C3, CCL3, CCL4, CCL5, CCL11, CXCL1, CXCL2, CXCL6, CXCL9, CXCL10, CXCL11, DARC, FGR, FPR1, HCK, ICAM2, IL16, IL1B, ITGAL, ITGAX, ITGB2, LSP1, LTF, MMP7, PIK3R5, S100A8, SAA1, SELL, SLPI                                                                                                                                                                                                                                                                                                                                                                                                                                                      | 29 |
| Cellular Movement | migration | migration of antigen presenting cells    | 2,78E-21 | C3, CCL2, CCL3, CCL4, CCL5, CCL19, CCL20, CCL21, CCR2, CCR5, CCR7, CD86, CSF1R, CXCL1, CXCL9, CXCL10, CXCL11, CXCL13, CXCR3, ICAM2, IL16, IL10RA, IL1B, RAC2, RUNX3, TAC1, TIMP1, WAS                                                                                                                                                                                                                                                                                                                                                                                                                                                         | 28 |
| Cellular Movement | migration | migration of dendritic cells             | 3,57E-21 | C3, CCL3, CCL4, CCL5, CCL19, CCL20, CCL21, CCR2, CCR5, CCR7, CD86, CXCL9, CXCL10, CXCL11, CXCL13, CXCR3, ICAM2, IL16, IL10RA, IL1B, RAC2, RUNX3, TAC1, TIMP1, WAS                                                                                                                                                                                                                                                                                                                                                                                                                                                                             | 25 |
| Cellular Movement | migration | migration of phagocytes                  | 3,90E-15 | CCL2, CCL3, CCL5, CSF1R, CXCL1, CXCL2, CXCL6, DARC, FGR, FPR1, HCK, IL1B, ITGAL, ITGAX, ITGB2, LSP1, MMP7, PIK3R5, RAC2, S100A8, SAA1, SELL, SLPI                                                                                                                                                                                                                                                                                                                                                                                                                                                                                             | 23 |
| Cellular Movement | migration | migration of neutrophils                 | 1,41E-14 | CCL3, CCL5, CXCL1, CXCL2, CXCL6, DARC, FGR, FPR1, HCK, IL1B, ITGAL, ITGAX, ITGB2, LSP1, MMP7, PIK3R5, S100A8, SAA1, SELL, SLPI                                                                                                                                                                                                                                                                                                                                                                                                                                                                                                                | 20 |
| Cellular Movement | migration | migration of eosinophils                 | 2,90E-14 | C3, CCL4, CCL5, CCL11, CXCL2, CXCL9, CXCL10, CXCL11, ICAM2, IL16, IL1B, ITGAL, ITGB2, LTF                                                                                                                                                                                                                                                                                                                                                                                                                                                                                                                                                     | 14 |
| Cellular Movement | migration | migration of peripheral blood leukocytes | 1,21E-09 | CCL3, CCL4, CCL5, CCL19, CCL21, CCR5, CCR7, CXCL13, CXCR3                                                                                                                                                                                                                                                                                                                                                                                                                                                                                                                                                                                     | 9  |
| Cellular Movement | migration | migration of B lymphocytes               | 3,61E-09 | CCL19, CCL20, CCL21, CD22, CXCL13, DOCK2, ICOS, TIMP1, TNFRSF1B, TNFSF13B                                                                                                                                                                                                                                                                                                                                                                                                                                                                                                                                                                     | 10 |
| Cellular Movement | migration | migration of leukemia cell lines         | 1,08E-08 | CCL2, CCL5, CCL11, CCR2, CXCL10, ITGAL, ITGB2, KLRK1, LCK, SH2D2A, TIMP1                                                                                                                                                                                                                                                                                                                                                                                                                                                                                                                                                                      | 11 |
| Cellular Movement | migration | migration of memory T lymphocytes        | 4,11E-08 | CCL21, CD28, CXCL11, CXCL13, ICOS                                                                                                                                                                                                                                                                                                                                                                                                                                                                                                                                                                                                             | 5  |
| Cellular Movement | migration | migration of PBMC cells                  | 6,77E-08 | CCL3, CCL4, CCL19, CCL21, CCR7, CXCL13                                                                                                                                                                                                                                                                                                                                                                                                                                                                                                                                                                                                        | 6  |
| Cellular Movement | migration | NK cell migration                        | 1,07E-07 | CCL3, CCL5, CCL21, CXCL9, CXCL10, CXCR3, IL16, SELL, XCL1                                                                                                                                                                                                                                                                                                                                                                                                                                                                                                                                                                                     | 9  |
| Cellular Movement | homing    | homing of leukocytes                     | 2,34E-29 | C3, CCL2, CCL3, CCL4, CCL5, CCL11, CCL18, CCL19, CCL20, CCL21, CCR2, CCR5, CCR7, CD4, CD28, CORO1A, CSF3R, CXCL1, CXCL2, CXCL6, CXCL9, CXCL10, CXCL11, CXCL13, CXCR3, CYSLTR1, FCER1G, FGR, FPR1, GNLY, HCK, IGHG1, IL16, IL12RB1, IL1B, ITGAL, ITGB2, LSP1, PRKCB, PTPN6, PTPRC, RAC2, RGS1, S100A8, SAA1, SELPLG, SERPINA3, TAC1, WAS, XCL1                                                                                                                                                                                                                                                                                                 | 50 |
| Cellular Movement | homing    | homing of eukaryotic cells               | 3,80E-24 | C3, CCL2, CCL3, CCL4, CCL5, CCL11, CCL18, CCL19, CCL20, CCL21, CCR2, CCR5, CCR7, CD4, CD28, CD69, CORO1A, CSF3R, CXCL1, CXCL2, CXCL6, CXCL9, CXCL10, CXCL11, CXCL13, CXCR3, CYSLTR1, DARC, DGKA, FCER1G, FGR, FPR1, GNLY, HCK, IGHG1, IL16, IL12RB1, IL1B, ITGAL, ITGB2, LCK, LSP1, PRKCB, PTPN6, PTPRC, RAC2, RGS1, S100A8, SAA1, SELPLG, SERPINA3, TAC1, WAS, XCL1                                                                                                                                                                                                                                                                          | 54 |
| Cellular Movement | homing    | homing of cells                          | 1,83E-23 | C3, CCL2, CCL3, CCL4, CCL5, CCL11, CCL18, CCL19, CCL20, CCL21, CCR2, CCR5, CCR7, CD4, CD28, CD69, CORO1A, CSF3R, CXCL1, CXCL2, CXCL6, CXCL9, CXCL10, CXCL11, CXCL13, CXCR3, CXCR6 (includes EG:10663), CYSLTR1, DARC, DGKA, FCER1G, FGR, FPR1, GNLY, HCK, IGHG1, IL16, IL12RB1, IL1B, ITGAL, ITGB2, LCK, LSP1, PRKCB, PTPN6, PTPRC, RAC2, RGS1, S100A8, SAA1, SELPLG, SERPINA3, TAC1, WAS, XCL1                                                                                                                                                                                                                                               | 55 |
| Cellular Movement | homing    | homing of                                | 9,53E-21 | CCL2, CCL3, CCL4, CCL5, CCL11, CCL18, CCL19, CCL20, CCL21, CCR2, CCR5,                                                                                                                                                                                                                                                                                                                                                                                                                                                                                                                                                                        | 33 |

|                   |            |                                      |          |                                                                                                                                                                                                                                                                                                                                                                                   |    |
|-------------------|------------|--------------------------------------|----------|-----------------------------------------------------------------------------------------------------------------------------------------------------------------------------------------------------------------------------------------------------------------------------------------------------------------------------------------------------------------------------------|----|
| Movement          |            | mononuclear leukocytes               |          | CCR7, CXCL9, CXCL10, CXCL11, CXCL13, CXCR3, CYSLTR1, FPR1, GNLY, IGHG1, IL16, IL1B, ITGAL, PRKCB, RAC2, RGS1, SAA1, SELPLG, SERPINA3, TAC1, WAS, XCL1                                                                                                                                                                                                                             |    |
| Cellular Movement | homing     | homing of myeloid cells              | 7,97E-20 | C3, CCL2, CCL3, CCL4, CCL5, CCL11, CD28, CORO1A, CSF3R, CXCL1, CXCL2, CXCL6, CXCL9, CXCL10, CXCR3, FCER1G, FGR, FPR1, HCK, IL1B, ITGB2, LSP1, PTPN6, PTPRC, RAC2, S100A8, TAC1, WAS, XCL1                                                                                                                                                                                         | 29 |
| Cellular Movement | homing     | homing of lymphocytes                | 1,37E-19 | CCL2, CCL3, CCL4, CCL5, CCL11, CCL18, CCL19, CCL20, CCL21, CCR2, CCR5, CCR7, CXCL9, CXCL10, CXCL11, CXCL13, CXCR3, CYSLTR1, GNLY, IGHG1, IL16, RAC2, RGS1, SAA1, SELPLG, TAC1, WAS, XCL1                                                                                                                                                                                          | 28 |
| Cellular Movement | homing     | homing of phagocytes                 | 4,11E-19 | CCL2, CCL3, CCL4, CCL5, CD28, CORO1A, CSF3R, CXCL1, CXCL2, CXCL6, CXCL9, CXCL10, CXCR3, FCER1G, FGR, FPR1, HCK, IL12RB1, IL1B, ITGB2, LSP1, PTPN6, RAC2, S100A8, SAA1, TAC1, WAS, XCL1                                                                                                                                                                                            | 28 |
| Cellular Movement | homing     | homing of granulocytes               | 7,75E-19 | C3, CCL2, CCL3, CCL4, CCL5, CCL11, CD28, CORO1A, CSF3R, CXCL1, CXCL2, CXCL6, CXCL9, CXCL10, CXCR3, FCER1G, FGR, FPR1, HCK, IL1B, ITGB2, LSP1, PTPN6, RAC2, S100A8, TAC1, WAS, XCL1                                                                                                                                                                                                | 28 |
| Cellular Movement | homing     | homing of neutrophils                | 1,56E-17 | CCL2, CCL3, CCL4, CCL5, CD28, CORO1A, CSF3R, CXCL1, CXCL2, CXCL6, CXCL10, FCER1G, FGR, FPR1, HCK, IL1B, ITGB2, LSP1, PTPN6, RAC2, S100A8, TAC1, WAS, XCL1                                                                                                                                                                                                                         | 24 |
| Cellular Movement | homing     | homing of T lymphocytes              | 9,00E-13 | CCL2, CCL3, CCL4, CCL5, CCL11, CCL18, CCL19, CCL20, CCL21, CCR5, CCR7, CXCL9, CXCL10, CXCL11, CYSLTR1, GNLY, IL16, SELPLG                                                                                                                                                                                                                                                         | 18 |
| Cellular Movement | homing     | homing of eosinophils                | 2,60E-09 | C3, CCL2, CCL3, CCL5, CCL11, CXCL9, CXCL10, CXCR3, FPR1, WAS                                                                                                                                                                                                                                                                                                                      | 10 |
| Cellular Movement | homing     | homing of memory T lymphocytes       | 1,11E-08 | CCL2, CCL5, CCL19, CCL21, CCR7, CXCL9, GNLY                                                                                                                                                                                                                                                                                                                                       | 7  |
| Cellular Movement | chemotaxis | chemotaxis of leukocytes             | 3,08E-27 | C3, CCL2, CCL3, CCL4, CCL5, CCL11, CCL18, CCL19, CCL20, CCL21, CCR2, CCR5, CCR7, CD4, CD28, CORO1A, CSF3R, CXCL1, CXCL2, CXCL6, CXCL9, CXCL10, CXCL11, CXCL13, CXCR3, CYSLTR1, FCER1G, FGR, FPR1, GNLY, HCK, IL16, IL12RB1, IL1B, ITGAL, ITGB2, LSP1, PRKCB, PTPN6, PTPRC, RAC2, RGS1, S100A8, SAA1, SERPINA3, TAC1, XCL1                                                         | 47 |
| Cellular Movement | chemotaxis | chemotaxis of eukaryotic cells       | 1,70E-24 | C3, CCL2, CCL3, CCL4, CCL5, CCL11, CCL18, CCL19, CCL20, CCL21, CCR2, CCR5, CCR7, CD4, CD28, CD69, CORO1A, CSF3R, CXCL1, CXCL2, CXCL6, CXCL9, CXCL10, CXCL11, CXCL13, CXCR3, CYSLTR1, DARC, DGKA, FCER1G, FGR, FPR1, GNLY, HCK, IL16, IL12RB1, IL1B, ITGAL, ITGB2, LCK, LSP1, PRKCB, PTPN6, PTPRC, RAC2, RGS1, S100A8, SAA1, SELPLG, SERPINA3, TAC1, WAS, XCL1                     | 53 |
| Cellular Movement | chemotaxis | chemotaxis                           | 2,26E-24 | C3, CCL2, CCL3, CCL4, CCL5, CCL11, CCL18, CCL19, CCL20, CCL21, CCR2, CCR5, CCR7, CCRL2, CD4, CD28, CD69, CORO1A, CSF3R, CXCL1, CXCL2, CXCL6, CXCL9, CXCL10, CXCL11, CXCL13, CXCR3, CYSLTR1, DARC, DGKA, DOCK2, FCER1G, FGR, FPR1, FPR3, GNLY, HCK, IL16, IL12RB1, IL1B, ITGAL, ITGB2, LCK, LSP1, PRKCB, PTPN6, PTPRC, RAC2, RGS1, S100A8, SAA1, SELPLG, SERPINA3, TAC1, WAS, XCL1 | 56 |
| Cellular Movement | chemotaxis | chemotaxis of myeloid cells          | 7,75E-19 | C3, CCL2, CCL3, CCL4, CCL5, CCL11, CD28, CORO1A, CSF3R, CXCL1, CXCL2, CXCL6, CXCL9, CXCL10, CXCR3, FCER1G, FGR, FPR1, HCK, IL1B, ITGB2, LSP1, PTPN6, PTPRC, RAC2, S100A8, TAC1, XCL1                                                                                                                                                                                              | 28 |
| Cellular Movement | chemotaxis | chemotaxis of mononuclear leukocytes | 8,38E-19 | CCL2, CCL3, CCL4, CCL5, CCL11, CCL18, CCL19, CCL20, CCL21, CCR2, CCR5, CCR7, CXCL9, CXCL10, CXCL11, CXCL13, CXCR3, CYSLTR1, FPR1, GNLY, IL16, IL1B, ITGAL, PRKCB, RAC2, RGS1, SAA1, SERPINA3, TAC1, XCL1                                                                                                                                                                          | 30 |
| Cellular Movement | chemotaxis | chemotaxis of phagocytes             | 3,97E-18 | CCL2, CCL3, CCL4, CCL5, CD28, CORO1A, CSF3R, CXCL1, CXCL2, CXCL6, CXCL9, CXCL10, CXCR3, FCER1G, FGR, FPR1, HCK, IL12RB1, IL1B, ITGB2, LSP1, PTPN6, RAC2, S100A8, SAA1, TAC1, XCL1                                                                                                                                                                                                 | 27 |
| Cellular Movement | chemotaxis | chemotaxis of granulocytes           | 7,31E-18 | C3, CCL2, CCL3, CCL4, CCL5, CCL11, CD28, CORO1A, CSF3R, CXCL1, CXCL2, CXCL6, CXCL9, CXCL10, CXCR3, FCER1G, FGR, FPR1, HCK, IL1B, ITGB2, LSP1, PTPN6, RAC2, S100A8, TAC1, XCL1                                                                                                                                                                                                     | 27 |
| Cellular Movement | chemotaxis | chemotaxis of lymphocytes            | 9,70E-18 | CCL2, CCL3, CCL4, CCL5, CCL11, CCL18, CCL19, CCL20, CCL21, CCR2, CCR5, CCR7, CXCL9, CXCL10, CXCL11, CXCL13, CXCR3, CYSLTR1, GNLY, IL16, RAC2, RGS1, SAA1, TAC1, XCL1                                                                                                                                                                                                              | 25 |
| Cellular Movement | chemotaxis | chemotaxis of neutrophils            | 1,64E-16 | CCL2, CCL3, CCL4, CCL5, CD28, CORO1A, CSF3R, CXCL1, CXCL2, CXCL6, CXCL10, FCER1G, FGR, FPR1, HCK, IL1B, ITGB2, LSP1, PTPN6, RAC2, S100A8, TAC1, XCL1                                                                                                                                                                                                                              | 23 |
| Cellular Movement | chemotaxis | chemotaxis                           | 1,41E-13 | C3, CCL2, CCL3, CCL4, CCL5, CCL11, CCL19, CCL20, CCL21, CCR5, CCR7, CD69,                                                                                                                                                                                                                                                                                                         | 26 |

|                   |                |                                          |          |                                                                                                                                                                                                                      |    |
|-------------------|----------------|------------------------------------------|----------|----------------------------------------------------------------------------------------------------------------------------------------------------------------------------------------------------------------------|----|
| Movement          | is             | of cell lines                            |          | CXCL1, CXCL9, CXCL10, CXCL11, CXCL13, CXCR3, DARC, DGKA, FPR1, IL12RB1, LCK, RGS1, SELPLG, WAS                                                                                                                       |    |
| Cellular Movement | chemotaxis     | chemotaxis of antigen presenting cells   | 2,54E-12 | CCL2, CCL3, CCL4, CCL5, CCL11, CCL19, CCL20, CCL21, CCR7, CXCL9, CXCR3, FPR1, GNLy, IL16, IL12RB1, IL1B, SAA1, TAC1                                                                                                  | 18 |
| Cellular Movement | chemotaxis     | chemotaxis of dendritic cells            | 2,22E-11 | CCL2, CCL3, CCL4, CCL5, CCL11, CCL19, CCL20, CCL21, CCR7, FPR1, GNLy, IL16, IL1B, TAC1                                                                                                                               | 14 |
| Cellular Movement | chemotaxis     | chemotaxis of T lymphocytes              | 2,84E-11 | CCL2, CCL3, CCL4, CCL5, CCL11, CCL18, CCL19, CCL20, CCL21, CCR5, CXCL9, CXCL10, CXCL11, CYSLTR1, GNLy, IL16                                                                                                          | 16 |
| Cellular Movement | chemotaxis     | chemotaxis of monocytes                  | 2,68E-09 | CCL2, CCL3, CCL4, CCL5, CCL11, CCR2, CXCL9, CXCL10, FPR1, GNLy, IL1B, ITGAL, PRKCB, SERPINA3                                                                                                                         | 14 |
| Cellular Movement | chemotaxis     | chemotaxis of B lymphocytes              | 2,91E-09 | CCL18, CCL19, CCL20, CCL21, CCR2, CXCL9, CXCL13, RAC2, RGS1                                                                                                                                                          | 9  |
| Cellular Movement | chemotaxis     | chemotaxis of leukocyte cell lines       | 1,08E-08 | C3, CCL3, CCL5, CCL19, CCL21, CCR7, CXCL11, CXCL13, CXCR3, RGS1, WAS                                                                                                                                                 | 11 |
| Cellular Movement | chemotaxis     | chemotaxis of tumor cell lines           | 1,12E-08 | C3, CCL2, CCL3, CCL4, CCL5, CCL11, CCL19, CCL21, CCR5, CD69, CXCL9, CXCL13, DARC, FPR1, LCK, SELPLG                                                                                                                  | 16 |
| Cellular Movement | chemotaxis     | chemotaxis of eosinophils                | 3,45E-08 | C3, CCL2, CCL3, CCL5, CCL11, CXCL9, CXCL10, CXCR3, FPR1                                                                                                                                                              | 9  |
| Cellular Movement | infiltration   | infiltration of cells                    | 6,34E-17 | C3, CCL2, CCL3, CCL4, CCL18, CCL19, CCL21, CCR2, CCR5, CCR7, CD86, CIITA, CSF1R, CXCL10, DARC, FGB, ICOS, IL16, IL1B, IL1RN, ITK, JAK3, LCP2, LTB, PRF1, SELPLG, STAT1, TCIRG1, TIMP1, TNFRSF1B, UCP2, XCL1, ZC3H12A | 33 |
| Cellular Movement | infiltration   | infiltration by mononuclear leukocytes   | 7,26E-15 | C3, CCL2, CCL3, CCL4, CCL18, CCL19, CCL21, CCR2, CCR5, CCR7, CD86, CXCL10, DARC, IL16, IL1B, ITK, PRF1, SELPLG, TIMP1, UCP2, XCL1, ZC3H12A                                                                           | 22 |
| Cellular Movement | infiltration   | infiltration of leukocytes               | 3,62E-14 | C3, CCL2, CCL3, CCL4, CCL18, CCL19, CCL21, CCR2, CCR5, CCR7, CD86, CSF1R, CXCL10, DARC, FGB, IL16, IL1B, IL1RN, ITK, PRF1, SELPLG, STAT1, TIMP1, TNFRSF1B, UCP2, XCL1, ZC3H12A                                       | 27 |
| Cellular Movement | infiltration   | infiltration by lymphocytes              | 1,51E-13 | C3, CCL3, CCL18, CCL19, CCL21, CCR2, CCR5, CCR7, CD86, CXCL10, DARC, IL16, IL1B, ITK, PRF1, SELPLG, TIMP1, UCP2, XCL1, ZC3H12A                                                                                       | 20 |
| Cellular Movement | infiltration   | infiltration by T lymphocytes            | 2,03E-13 | C3, CCL3, CCL18, CCL19, CCL21, CCR2, CCR5, CD86, CXCL10, DARC, IL16, IL1B, ITK, PRF1, SELPLG, XCL1                                                                                                                   | 16 |
| Cellular Movement | infiltration   | infiltration by neutrophils              | 8,14E-12 | C2, C3, CASP1, CCL3, CCL4, CCL21, CCR2, CXCL2, CXCL10, FCER1G, IL1B, IL1RN, ITGAL, ITGB2, NCF1, RAC2, SELL, TNFRSF1B, XCL1                                                                                           | 19 |
| Cellular Movement | infiltration   | infiltration by eosinophils              | 6,64E-09 | CCL3, CCL5, CCL11, CCL21, CD2, CD48, IL27RA, IL2RB, ITK, PLA2G7, RUNX3                                                                                                                                               | 11 |
| Cellular Movement | adhesion       | adhesion of T lymphocytes                | 9,88E-17 | CCL3, CCL4, CCL11, CCL19, CCL20, CCL21, CD2, CD48, CXCL9, CXCL11, CXCR3, FYB, ICAM2, ICOS, ITGAL, ITGB2, ITK, RASSF5, SELL, SELPLG, TAC1                                                                             | 21 |
| Cellular Movement | transmigration | transmigration of leukocytes             | 1,58E-16 | CCL2, CCL3, CCL4, CCL5, CCL11, CCL19, CCR7, CD28, CD86, CTSS, CXCL2, CXCL9, CXCL10, CXCL11, FPR1, ICAM2, IL1B, ITGAL, ITGAX, ITGB2, LSP1, SLPI                                                                       | 22 |
| Cellular Movement | transmigration | transmigration of mononuclear leukocytes | 7,71E-10 | CCL2, CCL3, CCL4, CCL5, CCR7, CD28, CD86, CTSS, CXCL11, ITGAL, ITGAX, ITGB2                                                                                                                                          | 12 |
| Cellular Movement | transmigration | transmigration of granulocytes           | 2,32E-09 | CCL11, CXCL2, CXCL9, CXCL10, FPR1, ICAM2, ITGAL, ITGAX, ITGB2, LSP1, SLPI                                                                                                                                            | 11 |
| Cellular Movement | transmigration | transmigration of                        | 1,11E-08 | CCL3, CCL4, CCL5, CCL19, CCR7, ICAM2, IL1B                                                                                                                                                                           | 7  |

|                               |                 |                                             |          |                                                                                                                                                                                                                                                                                                                                                                                                                                                                                                                                                                   |    |  |
|-------------------------------|-----------------|---------------------------------------------|----------|-------------------------------------------------------------------------------------------------------------------------------------------------------------------------------------------------------------------------------------------------------------------------------------------------------------------------------------------------------------------------------------------------------------------------------------------------------------------------------------------------------------------------------------------------------------------|----|--|
| t                             |                 | dendritic cells                             |          |                                                                                                                                                                                                                                                                                                                                                                                                                                                                                                                                                                   |    |  |
| Cellular Movement             | chemoattraction | chemoattraction of leukocytes               | 2,34E-16 | C3, CCL2, CCL3, CCL4, CCL5, CCL18, CCL19, CCL20, CXCL1, CXCL9, CXCL10, CXCL13, CXCR3, IL16, IL12RB1, XCL1                                                                                                                                                                                                                                                                                                                                                                                                                                                         | 16 |  |
| Cellular Movement             | chemoattraction | chemoattraction of normal cells             | 4,58E-16 | C3, CCL2, CCL3, CCL4, CCL5, CCL18, CCL19, CCL20, CXCL1, CXCL9, CXCL10, CXCL13, CXCR3, IL16, IL12RB1, IL1B, XCL1                                                                                                                                                                                                                                                                                                                                                                                                                                                   | 17 |  |
| Cellular Movement             | chemoattraction | chemoattraction of lymphocytes              | 3,48E-12 | CCL2, CCL3, CCL4, CCL5, CCL18, CXCL9, CXCL10, CXCL13, CXCR3, IL16                                                                                                                                                                                                                                                                                                                                                                                                                                                                                                 | 10 |  |
| Cellular Movement             | chemoattraction | chemoattraction of antigen presenting cells | 8,00E-11 | CCL2, CCL3, CCL4, CCL5, CCL19, CCL20, CXCL9, CXCR3, IL12RB1                                                                                                                                                                                                                                                                                                                                                                                                                                                                                                       | 9  |  |
| Cellular Movement             | chemoattraction | chemoattraction of macrophages              | 1,29E-10 | CCL2, CCL3, CCL4, CCL5, CXCL9, CXCR3, IL12RB1                                                                                                                                                                                                                                                                                                                                                                                                                                                                                                                     | 7  |  |
| Cellular Movement             | chemoattraction | chemoattraction of phagocytes               | 4,55E-10 | CCL2, CCL3, CCL4, CCL5, CXCL1, CXCL9, CXCR3, IL12RB1, XCL1                                                                                                                                                                                                                                                                                                                                                                                                                                                                                                        | 9  |  |
| Cellular Movement             | extravasation   | extravasation                               | 7,66E-13 | BTK, CCL2, CCL3, CCL4, CCL5, CCR2, CCR5, CXCL1, CYSLTR1, IL1B, ITGB2, ITK, LSP1, SELL, TAC1                                                                                                                                                                                                                                                                                                                                                                                                                                                                       | 15 |  |
| Cellular Movement             | extravasation   | extravasation of phagocytes                 | 1,96E-11 | CCL2, CCL3, CCL4, CCL5, CXCL1, IL1B, ITGB2, LSP1, SELL                                                                                                                                                                                                                                                                                                                                                                                                                                                                                                            | 9  |  |
| Cellular Movement             | extravasation   | extravasation of leukocytes                 | 5,78E-11 | CCL2, CCL3, CCL4, CCL5, CCR2, CCR5, CXCL1, IL1B, ITGB2, LSP1, SELL                                                                                                                                                                                                                                                                                                                                                                                                                                                                                                | 11 |  |
| Cellular Movement             | extravasation   | extravasation of antigen presenting cells   | 4,36E-09 | CCL2, CCL3, CCL4, CCL5, CCR2, CCR5                                                                                                                                                                                                                                                                                                                                                                                                                                                                                                                                | 6  |  |
| Cellular Movement             | recruitment     | recruitment of T lymphocytes                | 1,48E-12 | CCL2, CCL3, CCL4, CCL5, CCL11, CCL19, CCL20, CCL21, CCR2, CCR7, CD4, CD8A, CXCL9, CXCL10                                                                                                                                                                                                                                                                                                                                                                                                                                                                          | 14 |  |
| Cellular Movement             | mobilization    | mobilization of leukocytes                  | 1,22E-11 | CCL2, CCL3, CCL4, CCL11, CCL20, CCR5, CXCL2, CXCL10, CXCR3, FPR1, IL1B, ITGB2                                                                                                                                                                                                                                                                                                                                                                                                                                                                                     | 12 |  |
| Cellular Movement             | mobilization    | mobilization of normal cells                | 7,95E-11 | CCL2, CCL3, CCL4, CCL11, CCL20, CCR5, CSF3R, CXCL2, CXCL10, CXCR3, FPR1, IL1B, ITGB2, SELL                                                                                                                                                                                                                                                                                                                                                                                                                                                                        | 14 |  |
| Cellular Movement             | mobilization    | mobilization of blood cells                 | 1,14E-10 | CCL2, CCL3, CCL4, CCL11, CCL20, CCR5, CXCL2, CXCL10, CXCR3, FPR1, IL1B, ITGB2, SELL                                                                                                                                                                                                                                                                                                                                                                                                                                                                               | 13 |  |
| Cellular Movement             | mobilization    | mobilization of myeloid cells               | 2,07E-08 | CCL2, CCL3, CCL4, CCL11, CXCL2, CXCL10, FPR1, IL1B                                                                                                                                                                                                                                                                                                                                                                                                                                                                                                                | 8  |  |
| Cellular Movement             | trafficking     | trafficking of leukocytes                   | 3,81E-11 | CCL3, CCL4, CCL5, CCL19, CCL20, CCR2, CCR5, CXCL10, CXCL13, ITGB2, TNFRSF1B                                                                                                                                                                                                                                                                                                                                                                                                                                                                                       | 11 |  |
| Cellular Movement             | trafficking     | trafficking of cells                        | 7,32E-11 | CCL3, CCL4, CCL5, CCL19, CCL20, CCR2, CCR5, CXCL10, CXCL13, CXCR6 (includes EG:10663), ITGB2, TNFRSF1B                                                                                                                                                                                                                                                                                                                                                                                                                                                            | 12 |  |
| Cell-mediated Immune Response | homeostasis     | T cell homeostasis                          | 7,23E-44 | ADA, BCL11B, BCL2A1, CASP1, CCL3, CCL4, CCL5, CCL19, CCR5, CCR7, CD2, CD4, CD6, CD27, CD28, CD86, CD247, CD1D, CD3D, CD3E, CD3G, CD8A, CIITA, CLEC10A, CORO1A, DEF6, DOCK2, EOMES, FCER1G, GZMA, GZMB, HLA-DOA, HLA-DQA1, HLA-DQB1, ICOS, IDO1, IGHG1, IGHM, IKZF1, IL10RA, IL12RB1, IL1B, IL1RN, IL27RA, IL2RB, IL2RG, IL7R, IRF1, IRF4, ITGAL, ITGB2, ITK, JAK3, LAX1, LCK, LCP2, LTB, MAP4K1, MYB (includes EG:4602), NCAPH2, PRF1, PSMB9, PTPN6, PTPN22, PTPRC, RAC2, RASSF5, RHOH, RUNX3, SH2D1A, SH2D2A, SIT1, SLAMF1, SPIB, STAT1, STAT4, TCL1A, TNFRSF25, | 85 |  |

|                               |                 |                                         |          |                                                                                                                                                                                                                                                                                                                                                                                                                                                                                                                                                                                                             |    |
|-------------------------------|-----------------|-----------------------------------------|----------|-------------------------------------------------------------------------------------------------------------------------------------------------------------------------------------------------------------------------------------------------------------------------------------------------------------------------------------------------------------------------------------------------------------------------------------------------------------------------------------------------------------------------------------------------------------------------------------------------------------|----|
|                               |                 |                                         |          | TNFRSF1B, TNFSF13B, TRAT1, VAV1, WAS, XCL1, ZAP70                                                                                                                                                                                                                                                                                                                                                                                                                                                                                                                                                           |    |
| Cell-mediated Immune Response | development     | T cell development                      | 3,75E-43 | ADA, BCL11B, BCL2A1, CASP1, CCL3, CCL4, CCL5, CCL19, CCR5, CCR7, CD2, CD4, CD6, CD27, CD28, CD86, CD247, CD1D, CD3D, CD3E, CD3G, CD8A, CIITA, CLEC10A, DEF6, DOCK2, EOMES, FCER1G, GZMA, GZMB, HLA-DOA, HLA-DQA1, HLA-DQB1, ICOS, IDO1, IGHG1, IGHM, IKZF1, IL10RA, IL12RB1, IL1B, IL1RN, IL27RA, IL2RB, IL2RG, IL7R, IRF1, IRF4, ITGAL, ITGB2, ITK, JAK3, LAX1, LCK, LCP2, LTB, MAP4K1, MYB (includes EG:4602), NCAPH2, PRF1, PSMB9, PTPN6, PTPN22, PTPRC, RAC2, RASSF5, RHOH, RUNX3, SH2D1A, SH2D2A, SIT1, SLAMF1, SPIB, STAT1, STAT4, TCL1A, TNFRSF25, TNFRSF1B, TNFSF13B, TRAT1, VAV1, WAS, XCL1, ZAP70 | 84 |
| Cell-mediated Immune Response | development     | development of thymocytes               | 3,15E-11 | CD3D, CD3E, CD3G, IL2RB, IL2RG, IL7R, IRF1, LAX1, LCP2, MYB (includes EG:4602), PTPRC, SIT1, SPIB, TRAT1, ZAP70                                                                                                                                                                                                                                                                                                                                                                                                                                                                                             | 15 |
| Cell-mediated Immune Response | development     | development of helper T lymphocytes     | 1,08E-08 | CASP1, CD28, CD86, ICOS, IL12RB1, IL1B, IRF1, ITGB2, ITK, STAT1, STAT4                                                                                                                                                                                                                                                                                                                                                                                                                                                                                                                                      | 11 |
| Cell-mediated Immune Response | migration       | T cell migration                        | 1,94E-25 | ALOX5, C3, CCL2, CCL3, CCL4, CCL5, CCL11, CCL18, CCL19, CCL20, CCL21, CCR2, CCR5, CCR7, CD4, CD28, CD69, CD86, CXCL9, CXCL10, CXCL11, CXCL13, CXCR3, CYSLTR1, DARC, DOCK2, FYB, GNLY, ICOS, IL16, IL1B, ITGB2, ITK, LCK, PRF1, SELL, SELPLG, WAS, XCL1                                                                                                                                                                                                                                                                                                                                                      | 39 |
| Cell-mediated Immune Response | migration       | migration of memory T lymphocytes       | 4,11E-08 | CCL21, CD28, CXCL11, CXCL13, ICOS                                                                                                                                                                                                                                                                                                                                                                                                                                                                                                                                                                           | 5  |
| Cell-mediated Immune Response | migration       | NK cell migration                       | 1,07E-07 | CCL3, CCL5, CCL21, CXCL9, CXCL10, CXCR3, IL16, SELL, XCL1                                                                                                                                                                                                                                                                                                                                                                                                                                                                                                                                                   | 9  |
| Cell-mediated Immune Response | differentiation | differentiation of T lymphocytes        | 3,22E-24 | ADA, BCL2A1, CCL3, CCL19, CD2, CD4, CD28, CD86, CD1D, CD3E, CD8A, DEF6, HLA-DOA, HLA-DQA1, ICOS, IGHG1, IKZF1, IL12RB1, IL1B, IL1RN, IL27RA, IL2RB, IL2RG, IL7R, IRF1, IRF4, ITGAL, ITGB2, ITK, JAK3, LCK, LCP2, MYB (includes EG:4602), NCAPH2, PTPN22, PTPRC, RASSF5, SH2D1A, SLAMF1, STAT1, STAT4, TNFSF13B, VAV1, WAS, ZAP70                                                                                                                                                                                                                                                                            | 45 |
| Cell-mediated Immune Response | differentiation | differentiation of helper T lymphocytes | 9,77E-11 | CCL3, CD28, CD86, ICOS, IGHG1, IL12RB1, IL1B, IL27RA, IL2RB, IRF1, ITGAL, ITGB2, ITK, JAK3, SH2D1A, STAT1, STAT4, TNFSF13B, VAV1                                                                                                                                                                                                                                                                                                                                                                                                                                                                            | 19 |
| Cell-mediated Immune Response | differentiation | differentiation of Th2 cells            | 6,00E-08 | CD28, CD86, ICOS, IGHG1, IRF1, ITK, JAK3, SH2D1A, STAT1, STAT4, VAV1                                                                                                                                                                                                                                                                                                                                                                                                                                                                                                                                        | 11 |
| Cell-mediated Immune Response | differentiation | differentiation of thymocytes           | 6,97E-08 | CD2, CD28, CD86, CD3E, IKZF1, IL2RG, LCP2, MYB (includes EG:4602), WAS, ZAP70                                                                                                                                                                                                                                                                                                                                                                                                                                                                                                                               | 10 |
| Cell-mediated Immune Response | cell death      | cell death of T lymphocytes             | 7,64E-22 | ADA, BCL2A1, CASP1, CCL3, CCL4, CCL5, CCL19, CCR5, CD2, CD4, CD27, CD28, CD247, CD3E, CIITA, CLEC10A, DEF6, EOMES, GZMA, GZMB, ICOS, IDO1, IGHM, IL1B, IL2RG, IL7R, ITK, JAK3, LCK, MAP4K1, PRF1, PTPRC, RAC2, SH2D2A, STAT1, TCL1A, TNFRSF25, TNFRSF1B, WAS, XCL1                                                                                                                                                                                                                                                                                                                                          | 40 |
| Cell-mediated Immune Response | cell movement   | cell movement of T lymphocytes          | 1,37E-18 | C3, CCL2, CCL3, CCL4, CCL5, CCL11, CCL18, CCL19, CCL20, CCL21, CCR2, CCR5, CCR7, CD28, CD86, CXCL9, CXCL10, CXCL11, CYSLTR1, DARC, GNLY, IL16, IL1B, ITGB2, ITK, PRF1, SELL, SELPLG, XCL1                                                                                                                                                                                                                                                                                                                                                                                                                   | 29 |
| Cell-mediated Immune Response | cell movement   | cell movement of memory T lymphocytes   | 1,68E-12 | CCL2, CCL5, CCL19, CCL21, CCR7, CD28, CXCL9, CXCL11, GNLY, ITGB2                                                                                                                                                                                                                                                                                                                                                                                                                                                                                                                                            | 10 |
| Cell-mediated Immune Response | apoptosis       | apoptosis of T lymphocytes              | 1,06E-17 | ADA, BCL2A1, CASP1, CCL3, CCL4, CCL5, CCR5, CD2, CD4, CD27, CD28, CD247, CD3E, CIITA, GZMA, GZMB, ICOS, IL1B, IL2RG, IL7R, ITK, JAK3, LCK, MAP4K1, PRF1, PTPRC, RAC2, STAT1, TCL1A, TNFRSF25, TNFRSF1B, WAS, XCL1                                                                                                                                                                                                                                                                                                                                                                                           | 33 |

|                                   |                               |                                                |          |                                                                                                                                                                                                                                                                                                                                                                                                                                                                                                                                                                                                                     |    |
|-----------------------------------|-------------------------------|------------------------------------------------|----------|---------------------------------------------------------------------------------------------------------------------------------------------------------------------------------------------------------------------------------------------------------------------------------------------------------------------------------------------------------------------------------------------------------------------------------------------------------------------------------------------------------------------------------------------------------------------------------------------------------------------|----|
| Cell-mediated Immune Response     | adhesion                      | adhesion of T lymphocytes                      | 9,88E-17 | CCL3, CCL4, CCL11, CCL19, CCL20, CCL21, CD2, CD48, CXCL9, CXCL11, CXCR3, FYB, ICAM2, ICOS, ITGAL, ITGB2, ITK, RASSF5, SELL, SELPLG, TAC1                                                                                                                                                                                                                                                                                                                                                                                                                                                                            | 21 |
| Cell-mediated Immune Response     | selection                     | selection of T lymphocytes                     | 3,41E-16 | CD4, CD28, CD1D, CD3D, CD3E, DOCK2, HLA-DOA, ITK, PTPRC, RHOH, SIT1, TNFRSF25, TRAT1, VAV1, ZAP70                                                                                                                                                                                                                                                                                                                                                                                                                                                                                                                   | 15 |
| Cell-mediated Immune Response     | selection                     | selection of thymocytes                        | 1,11E-08 | CD28, HLA-DOA, ITK, RHOH, SIT1, TNFRSF25, TRAT1                                                                                                                                                                                                                                                                                                                                                                                                                                                                                                                                                                     | 7  |
| Cell-mediated Immune Response     | infiltration                  | infiltration by T lymphocytes                  | 2,03E-13 | C3, CCL3, CCL18, CCL19, CCL21, CCR2, CCR5, CD86, CXCL10, DARC, IL16, IL1B, ITK, PRF1, SELPLG, XCL1                                                                                                                                                                                                                                                                                                                                                                                                                                                                                                                  | 16 |
| Cell-mediated Immune Response     | homing                        | homing of T lymphocytes                        | 9,00E-13 | CCL2, CCL3, CCL4, CCL5, CCL11, CCL18, CCL19, CCL20, CCL21, CCR5, CCR7, CXCL9, CXCL10, CXCL11, CYSLTR1, GNLY, IL16, SELPLG                                                                                                                                                                                                                                                                                                                                                                                                                                                                                           | 18 |
| Cell-mediated Immune Response     | homing                        | homing of memory T lymphocytes                 | 1,11E-08 | CCL2, CCL5, CCL19, CCL21, CCR7, CXCL9, GNLY                                                                                                                                                                                                                                                                                                                                                                                                                                                                                                                                                                         | 7  |
| Cell-mediated Immune Response     | recruitment                   | recruitment of T lymphocytes                   | 1,48E-12 | CCL2, CCL3, CCL4, CCL5, CCL11, CCL19, CCL20, CCL21, CCR2, CCR7, CD4, CD8A, CXCL9, CXCL10                                                                                                                                                                                                                                                                                                                                                                                                                                                                                                                            | 14 |
| Cell-mediated Immune Response     | chemotaxis                    | chemotaxis of T lymphocytes                    | 2,84E-11 | CCL2, CCL3, CCL4, CCL5, CCL11, CCL18, CCL19, CCL20, CCL21, CCR5, CXCL9, CXCL10, CXCL11, CYSLTR1, GNLY, IL16                                                                                                                                                                                                                                                                                                                                                                                                                                                                                                         | 16 |
| Cell-mediated Immune Response     | generation                    | generation of T lymphocytes                    | 2,01E-10 | CD4, CD28, CD86, HLA-DQB1, ICOS, IL10RA, IL12RB1, IL27RA, IL2RG, ITK, JAK3, PSMB9, STAT4, TNFSF13B                                                                                                                                                                                                                                                                                                                                                                                                                                                                                                                  | 14 |
| Cell-mediated Immune Response     | polarization                  | polarization of T lymphocytes                  | 1,08E-08 | CCL19, CD28, ICOS, IL12RB1, IL1B, IRF4, LCK, RASSF5, SLAMF1, STAT4, VAV1                                                                                                                                                                                                                                                                                                                                                                                                                                                                                                                                            | 11 |
| Cell-mediated Immune Response     | proliferation                 | proliferation of thymocytes                    | 1,09E-08 | CD2, CD28, CD3E, IL1B, IL2RG, ITK, JAK3, LCP2, MYB (includes EG:4602), PTPN6, TNFRSF1B, WAS, ZAP70                                                                                                                                                                                                                                                                                                                                                                                                                                                                                                                  | 13 |
| Cell-mediated Immune Response     | activation-induced cell death | activation-induced cell death of T lymphocytes | 1,83E-08 | CCR5, CD28, CD3E, CIITA, ITK, MAP4K1, PRF1, RAC2, STAT1                                                                                                                                                                                                                                                                                                                                                                                                                                                                                                                                                             | 9  |
| Cell-mediated Immune Response     | positive selection            | positive selection of T lymphocytes            | 6,77E-08 | CD4, ITK, RHOH, SIT1, TRAT1, VAV1                                                                                                                                                                                                                                                                                                                                                                                                                                                                                                                                                                                   | 6  |
| Cellular Function and Maintenance | homeostasis                   | homeostasis of T cell                          | 7,23E-44 | ADA, BCL11B, BCL2A1, CASP1, CCL3, CCL4, CCL5, CCL19, CCR5, CCR7, CD2, CD4, CD6, CD27, CD28, CD86, CD247, CD1D, CD3D, CD3E, CD3G, CD8A, CIITA, CLEC10A, CORO1A, DEF6, DOCK2, EOMES, FCER1G, GZMA, GZMB, HLA-DOA, HLA-DQA1, HLA-DQB1, ICOS, IDO1, IGHG1, IGHM, IKZF1, IL10RA, IL12RB1, IL1B, IL1RN, IL27RA, IL2RB, IL2RG, IL7R, IRF1, IRF4, ITGAL, ITGB2, ITK, JAK3, LAX1, LCK, LCP2, LTB, MAP4K1, MYB (includes EG:4602), NCAPH2, PRF1, PSMB9, PTPN6, PTPN22, PTPRC, RAC2, RASSF5, RHOH, RUNX3, SH2D1A, SH2D2A, SIT1, SLAMF1, SPIB, STAT1, STAT4, TCL1A, TNFRSF25, TNFRSF1B, TNFSF13B, TRAT1, VAV1, WAS, XCL1, ZAP70 | 85 |
| Cellular Function and Maintenance | homeostasis                   | homeostasis of leukocytes                      | 8,27E-44 | ADA, BCL11B, BCL2A1, CASP1, CCL3, CCL4, CCL5, CCL19, CCR5, CCR7, CD2, CD4, CD6, CD27, CD28, CD86, CD247, CD1D, CD3D, CD3E, CD3G, CD8A, CIITA, CLEC10A, CORO1A, DEF6, DOCK2, EOMES, FCER1G, GZMA, GZMB, HLA-DOA, HLA-DQA1, HLA-DQB1, ICOS, IDO1, IGHG1, IGHM, IKZF1, IL10RA,                                                                                                                                                                                                                                                                                                                                         | 86 |

|                                   |                 |                                         |          |                                                                                                                                                                                                                                                                                                                                                                                                                                                                                                                                                                                                             |    |
|-----------------------------------|-----------------|-----------------------------------------|----------|-------------------------------------------------------------------------------------------------------------------------------------------------------------------------------------------------------------------------------------------------------------------------------------------------------------------------------------------------------------------------------------------------------------------------------------------------------------------------------------------------------------------------------------------------------------------------------------------------------------|----|
| ce                                |                 |                                         |          | IL12RB1, IL1B, IL1RN, IL27RA, IL2RB, IL2RG, IL7R, IRF1, IRF4, ITGAL, ITGB2, ITK, JAK3, LAX1, LCK, LCP2, LTB, MAP4K1, MYB (includes EG:4602), NCAPH2, PRF1, PSMB9, PTPN6, PTPN22, PTPRC, RAC2, RASSF5, RHOH, RUNX3, SH2D1A, SH2D2A, SIT1, SLAMF1, SPIB, STAT1, STAT4, TCL1A, TNFRSF25, TNFRSF1B, TNFSF13B, TRAT1, TYROBP, VAV1, WAS, XCL1, ZAP70                                                                                                                                                                                                                                                             |    |
| Cellular Function and Maintenance | development     | T cell development                      | 3,75E-43 | ADA, BCL11B, BCL2A1, CASP1, CCL3, CCL4, CCL5, CCL19, CCR5, CCR7, CD2, CD4, CD6, CD27, CD28, CD86, CD247, CD1D, CD3D, CD3E, CD3G, CD8A, CIITA, CLEC10A, DEF6, DOCK2, EOMES, FCER1G, GZMA, GZMB, HLA-DOA, HLA-DQA1, HLA-DQB1, ICOS, IDO1, IGHG1, IGHM, IKZF1, IL10RA, IL12RB1, IL1B, IL1RN, IL27RA, IL2RB, IL2RG, IL7R, IRF1, IRF4, ITGAL, ITGB2, ITK, JAK3, LAX1, LCK, LCP2, LTB, MAP4K1, MYB (includes EG:4602), NCAPH2, PRF1, PSMB9, PTPN6, PTPN22, PTPRC, RAC2, RASSF5, RHOH, RUNX3, SH2D1A, SH2D2A, SIT1, SLAMF1, SPIB, STAT1, STAT4, TCL1A, TNFRSF25, TNFRSF1B, TNFSF13B, TRAT1, VAV1, WAS, XCL1, ZAP70 | 84 |
| Cellular Function and Maintenance | development     | development of thymocytes               | 3,15E-11 | CD3D, CD3E, CD3G, IL2RB, IL2RG, IL7R, IRF1, LAX1, LCP2, MYB (includes EG:4602), PTPRC, SIT1, SPIB, TRAT1, ZAP70                                                                                                                                                                                                                                                                                                                                                                                                                                                                                             | 15 |
| Cellular Function and Maintenance | development     | development of helper T lymphocytes     | 1,08E-08 | CASP1, CD28, CD86, ICOS, IL12RB1, IL1B, IRF1, ITGB2, ITK, STAT1, STAT4                                                                                                                                                                                                                                                                                                                                                                                                                                                                                                                                      | 11 |
| Cellular Function and Maintenance | differentiation | differentiation of T lymphocytes        | 3,22E-24 | ADA, BCL2A1, CCL3, CCL19, CD2, CD4, CD28, CD86, CD1D, CD3E, CD8A, DEF6, HLA-DOA, HLA-DQA1, ICOS, IGHG1, IKZF1, IL12RB1, IL1B, IL1RN, IL27RA, IL2RB, IL2RG, IL7R, IRF1, IRF4, ITGAL, ITGB2, ITK, JAK3, LCK, LCP2, MYB (includes EG:4602), NCAPH2, PTPN22, PTPRC, RASSF5, SH2D1A, SLAMF1, STAT1, STAT4, TNFSF13B, VAV1, WAS, ZAP70                                                                                                                                                                                                                                                                            | 45 |
| Cellular Function and Maintenance | differentiation | differentiation of helper T lymphocytes | 9,77E-11 | CCL3, CD28, CD86, ICOS, IGHG1, IL12RB1, IL1B, IL27RA, IL2RB, IRF1, ITGAL, ITGB2, ITK, JAK3, SH2D1A, STAT1, STAT4, TNFSF13B, VAV1                                                                                                                                                                                                                                                                                                                                                                                                                                                                            | 19 |
| Cellular Function and Maintenance | differentiation | differentiation of Th2 cells            | 6,00E-08 | CD28, CD86, ICOS, IGHG1, IRF1, ITK, JAK3, SH2D1A, STAT1, STAT4, VAV1                                                                                                                                                                                                                                                                                                                                                                                                                                                                                                                                        | 11 |
| Cellular Function and Maintenance | differentiation | differentiation of thymocytes           | 6,97E-08 | CD2, CD28, CD86, CD3E, IKZF1, IL2RG, LCP2, MYB (includes EG:4602), WAS, ZAP70                                                                                                                                                                                                                                                                                                                                                                                                                                                                                                                               | 10 |
| Cellular Function and Maintenance | cell death      | cell death of T lymphocytes             | 7,64E-22 | ADA, BCL2A1, CASP1, CCL3, CCL4, CCL5, CCL19, CCR5, CD2, CD4, CD27, CD28, CD247, CD3E, CIITA, CLEC10A, DEF6, EOMES, GZMA, GZMB, ICOS, IDO1, IGHM, IL1B, IL2RG, IL7R, ITK, JAK3, LCK, MAP4K1, PRF1, PTPRC, RAC2, SH2D2A, STAT1, TCL1A, TNFRSF25, TNFRSF1B, WAS, XCL1                                                                                                                                                                                                                                                                                                                                          | 40 |
| Cellular Function and Maintenance | apoptosis       | apoptosis of T lymphocytes              | 1,06E-17 | ADA, BCL2A1, CASP1, CCL3, CCL4, CCL5, CCR5, CD2, CD4, CD27, CD28, CD247, CD3E, CIITA, GZMA, GZMB, ICOS, IL1B, IL2RG, IL7R, ITK, JAK3, LCK, MAP4K1, PRF1, PTPRC, RAC2, STAT1, TCL1A, TNFRSF25, TNFRSF1B, WAS, XCL1                                                                                                                                                                                                                                                                                                                                                                                           | 33 |
| Cellular Function and Maintenance | selection       | selection of T lymphocytes              | 3,41E-16 | CD4, CD28, CD1D, CD3D, CD3E, DOCK2, HLA-DOA, ITK, PTPRC, RHOH, SIT1, TNFRSF25, TRAT1, VAV1, ZAP70                                                                                                                                                                                                                                                                                                                                                                                                                                                                                                           | 15 |
| Cellular Function and Maintenance | selection       | selection of thymocytes                 | 1,11E-08 | CD28, HLA-DOA, ITK, RHOH, SIT1, TNFRSF25, TRAT1                                                                                                                                                                                                                                                                                                                                                                                                                                                                                                                                                             | 7  |
| Cellular                          | phagocyt        | phagocytosis                            | 1,79E-13 | C3, C1QA, CD4, CD14, CLEC7A, CORO1A, CSF2RB, CSF3R, CXCL10, DEF6,                                                                                                                                                                                                                                                                                                                                                                                                                                                                                                                                           | 24 |



|                                   |                   |                                    |          |                                                                                                                                                |    |
|-----------------------------------|-------------------|------------------------------------|----------|------------------------------------------------------------------------------------------------------------------------------------------------|----|
| Function and Maintenance          | osis              | s                                  |          | FCER1G, FCGR3B, FGR, HCK, ICOS, IGHG1, ITGAX, ITGB2, PRKCB, PTPN6, RAC2, SELPLG, VAV1, WAS                                                     |    |
| Cellular Function and Maintenance | phagocytosis      | phagocytosis of cells              | 7,23E-12 | C3, C1QA, CD4, CD14, CORO1A, CSF2RB, CSF3R, CXCL10, DEF6, FCER1G, FCGR3B, FGR, HCK, ITGAX, ITGB2, PRKCB, PTPN6, RAC2, SELPLG, VAV1, WAS        | 21 |
| Cellular Function and Maintenance | phagocytosis      | phagocytosis of eukaryotic cells   | 7,62E-09 | CD14, CORO1A, CSF2RB, CSF3R, CXCL10, DEF6, FCGR3B, FGR, HCK, ITGB2, PRKCB, PTPN6, RAC2, SELPLG, VAV1, WAS                                      | 16 |
| Cellular Function and Maintenance | function          | function of leukocytes             | 1,38E-12 | CD4, CD28, CD86, ICOS, IL10RA, IL1B, IRF1, JAK3, KLRK1, LAX1, LTB, PRF1, SH2D1A, SLPI, STAT4, TLR8 (includes EG:51311), TNFSF13B, VAV1         | 18 |
| Cellular Function and Maintenance | function          | function of lymphocytes            | 1,21E-11 | CD4, CD28, CD86, ICOS, IL10RA, JAK3, KLRK1, LAX1, PRF1, SH2D1A, SLPI, STAT4, TLR8 (includes EG:51311), TNFSF13B, VAV1                          | 15 |
| Cellular Function and Maintenance | function          | function of cells                  | 1,87E-09 | CD4, CD28, CD86, ICOS, IL10RA, IL1B, IRF1, JAK3, KLRK1, LAX1, LTB, LTF, PRF1, SH2D1A, SLPI, STAT4, TLR8 (includes EG:51311), TNFSF13B, VAV1    | 19 |
| Cellular Function and Maintenance | function          | function of T lymphocytes          | 2,65E-08 | CD4, CD28, ICOS, IL10RA, JAK3, LAX1, PRF1, SH2D1A, STAT4, TLR8 (includes EG:51311), VAV1                                                       | 11 |
| Cellular Function and Maintenance | respiratory burst | respiratory burst of myeloid cells | 3,65E-12 | C3, CCL11, CXCL1, FCER1G, FGR, FPR1, HCK, IGHA1, ITGAL, ITGAX, ITGB2, PTPRC, TYROBP                                                            | 13 |
| Cellular Function and Maintenance | respiratory burst | respiratory burst of leukocytes    | 3,91E-12 | C3, CCL2, CCL11, CXCL1, FCER1G, FGR, FPR1, HCK, IGHA1, ITGAL, ITGAX, ITGB2, PTPRC, TYROBP                                                      | 14 |
| Cellular Function and Maintenance | respiratory burst | respiratory burst of granulocytes  | 5,23E-11 | C3, CCL11, CXCL1, FCER1G, FGR, FPR1, HCK, IGHA1, ITGAL, ITGAX, ITGB2, TYROBP                                                                   | 12 |
| Cellular Function and Maintenance | respiratory burst | respiratory burst of neutrophils   | 2,62E-10 | C3, CXCL1, FCER1G, FGR, FPR1, HCK, IGHA1, ITGAL, ITGAX, ITGB2, TYROBP                                                                          | 11 |
| Cellular Function and Maintenance | generation        | generation of T lymphocytes        | 2,01E-10 | CD4, CD28, CD86, HLA-DQB1, ICOS, IL10RA, IL12RB1, IL27RA, IL2RG, ITK, JAK3, PSMB9, STAT4, TNFSF13B                                             | 14 |
| Cellular Function and Maintenance | engulfment        | engulfment of cells                | 2,26E-10 | C3, C1QA, CD4, CD14, CD163, CORO1A, CSF2RB, CSF3R, CXCL10, DEF6, FCER1G, FCGR3B, FGR, HCK, ITGAX, ITGB2, PRKCB, PTPN6, RAC2, SELPLG, VAV1, WAS | 22 |
| Cellular Function and Maintenance | presence          | presence of                        | 7,53E-10 | C3, CCL19, CCL21, CCR7, CR2, CXCL13, FGR, HCK, JAK3                                                                                            | 9  |

|                                   |                               |                                                |          |                                                                                                                                                                                                                                                                                                                                                                                                                                                                                                                                                                                                                                                                                                                                                                                                                                                                |  |     |
|-----------------------------------|-------------------------------|------------------------------------------------|----------|----------------------------------------------------------------------------------------------------------------------------------------------------------------------------------------------------------------------------------------------------------------------------------------------------------------------------------------------------------------------------------------------------------------------------------------------------------------------------------------------------------------------------------------------------------------------------------------------------------------------------------------------------------------------------------------------------------------------------------------------------------------------------------------------------------------------------------------------------------------|--|-----|
| Function and Maintenance          |                               | leukocytes                                     |          |                                                                                                                                                                                                                                                                                                                                                                                                                                                                                                                                                                                                                                                                                                                                                                                                                                                                |  |     |
| Cellular Function and Maintenance | positive selection            | positive selection of lymphocytes              | 5,69E-09 | CD4, ITK, RHOH, SIT1, TRAT1, VAV1, ZAP70                                                                                                                                                                                                                                                                                                                                                                                                                                                                                                                                                                                                                                                                                                                                                                                                                       |  | 7   |
| Cellular Function and Maintenance | positive selection            | positive selection of T lymphocytes            | 6,77E-08 | CD4, ITK, RHOH, SIT1, TRAT1, VAV1                                                                                                                                                                                                                                                                                                                                                                                                                                                                                                                                                                                                                                                                                                                                                                                                                              |  | 6   |
| Cellular Function and Maintenance | polarization                  | polarization of T lymphocytes                  | 1,08E-08 | CCL19, CD28, ICOS, IL12RB1, IL1B, IRF4, LCK, RASSF5, SLAMF1, STAT4, VAV1                                                                                                                                                                                                                                                                                                                                                                                                                                                                                                                                                                                                                                                                                                                                                                                       |  | 11  |
| Cellular Function and Maintenance | proliferation                 | proliferation of thymocytes                    | 1,09E-08 | CD2, CD28, CD3E, IL1B, IL2RG, ITK, JAK3, LCP2, MYB (includes EG:4602), PTPN6, TNFRSF1B, WAS, ZAP70                                                                                                                                                                                                                                                                                                                                                                                                                                                                                                                                                                                                                                                                                                                                                             |  | 13  |
| Cellular Function and Maintenance | activation-induced cell death | activation-induced cell death of T lymphocytes | 1,83E-08 | CCR5, CD28, CD3E, CIITA, ITK, MAP4K1, PRF1, RAC2, STAT1                                                                                                                                                                                                                                                                                                                                                                                                                                                                                                                                                                                                                                                                                                                                                                                                        |  | 9   |
| Cellular Function and Maintenance | compartmentalization          | compartmentalization of cells                  | 5,94E-08 | CCL11, CCL19, CCR2, CCR5, CXCL13, CXCR3, LTB                                                                                                                                                                                                                                                                                                                                                                                                                                                                                                                                                                                                                                                                                                                                                                                                                   |  | 7   |
| Immunological Disease             | immunological disorder        | immunological disorder of mammalia             | 3,92E-36 | AOAH, BTK, BTLA, C2, C3, C1QA, C3AR1, CASP1, CCL2, CCL4, CCL5, CCL11, CCR2, CCR5, CD4, CD14, CD19, CD22, CD28, CD86, CD1D, CD3E, CIITA, CXCL9, CXCL10, CXCR3, CYBB, DEF6, FCER1G, HLA-DQA1, HLA-DQB1, HLA-DRB1, ICOS, IDO1, IGHG1, IGHM, IGKC, IL1RN, IL27RA, IL2RG, IL7R, IRF1, IRF4, ITGAL, ITGB2, JAK3, LCP2, LTB, NCF1, NCF1C, PRF1, RUNX3, SELL, SH2D1A, STAT1, STAT4, TAP1, TCIRG1, TLR7, TNFRSF25, TYROBP, UBASH3A, UCP2, VAV1, WAS                                                                                                                                                                                                                                                                                                                                                                                                                     |  | 65  |
| Immunological Disease             | immunological disorder        | immunological disorder of rodents              | 1,46E-33 | AOAH, BTK, BTLA, C3, C1QA, C3AR1, CASP1, CCL2, CCL4, CCL5, CCL11, CCR2, CCR5, CD4, CD14, CD19, CD22, CD28, CD86, CD1D, CD3E, CIITA, CXCL10, CXCR3, CYBB, DEF6, FCER1G, HLA-DQA1, HLA-DQB1, ICOS, IDO1, IGHG1, IGHM, IGKC, IL1RN, IL27RA, IL2RG, IL7R, IRF1, IRF4, ITGAL, ITGB2, JAK3, LCP2, LTB, NCF1, PRF1, RUNX3, SELL, SH2D1A, STAT1, STAT4, TAP1, TCIRG1, TLR7, TNFRSF25, TYROBP, UBASH3A, UCP2, VAV1, WAS                                                                                                                                                                                                                                                                                                                                                                                                                                                 |  | 61  |
| Immunological Disease             | immunological disorder        | immunological disorder of mice                 | 1,27E-32 | AOAH, BTK, BTLA, C3, C1QA, C3AR1, CASP1, CCL2, CCL4, CCL5, CCL11, CCR2, CCR5, CD4, CD14, CD19, CD22, CD28, CD86, CD1D, CD3E, CIITA, CXCL10, CYBB, DEF6, FCER1G, HLA-DQA1, HLA-DQB1, ICOS, IDO1, IGHM, IGKC, IL1RN, IL27RA, IL2RG, IL7R, IRF1, IRF4, ITGAL, ITGB2, JAK3, LCP2, LTB, NCF1, PRF1, RUNX3, SELL, SH2D1A, STAT1, STAT4, TAP1, TCIRG1, TLR7, TNFRSF25, TYROBP, UBASH3A, UCP2, VAV1, WAS                                                                                                                                                                                                                                                                                                                                                                                                                                                               |  | 59  |
| Immunological Disease             | immunological disorder        | immunological disorder                         | 1,06E-28 | ADA, ADAM8, AG2, AIF1, ALOX5, AMICA1, AOA, APOBEC3G, BTK, BTLA, BTN3A2, C2, C3, C1QA, C3AR1, CASP1, CCL2, CCL3, CCL4, CCL5, CCL11, CCL18, CCL19, CCL20, CCL21, CCR2, CCR5, CCRL2, CD2, CD4, CD6, CD14, CD19, CD22, CD28, CD52, CD53, CD69, CD86, CD247, CD1D, CD3D, CD3E, CD3G, CD79A, CD8A, CFP, CIITA, CPA3, CR2, CSF1R, CSF2RB, CSF3R, CTSS, CXCL1, CXCL2, CXCL6, CXCL9, CXCL10, CXCL13, CXCR3, CYBB, CYSLTR1, DEF6, FCER1G, FCN1, FCRL3, GABBR1, GBP2, GNLY, GPSM3, GRN, GZMA, GZMB, HCK, HCLS1, HCP5, HLA-DMB, HLA-DOA, HLA-DOB, HLA-DPA1, HLA-DPB1, HLA-DQA1, HLA-DQB1, HLA-DRB1, HLA-F, ICOS, IDO1, IFITM1, IGHG1, IGHM, IGKC, IGL@, IKZF1, IL16, IL10RA, IL12RB1, IL1B, IL1RN, IL27RA, IL2RB, IL2RG, IL7R, IMPDH1, IRF1, IRF4, ITGAL, ITGB2, ITK, JAK3, KLRB1, LCK, LCP1, LCP2, LST1, LTB, LTF, LYZ, MS4A1, MS4A7, MYB (includes EG:4602), NCF1, NCF4, |  | 163 |

|                       |                                           |                                                       |          |                                                                                                                                                                                                                                                                                                                                                                                                                                                                                                                                                                                                                                                                                                                                                                                                                                                                                                                                 |     |
|-----------------------|-------------------------------------------|-------------------------------------------------------|----------|---------------------------------------------------------------------------------------------------------------------------------------------------------------------------------------------------------------------------------------------------------------------------------------------------------------------------------------------------------------------------------------------------------------------------------------------------------------------------------------------------------------------------------------------------------------------------------------------------------------------------------------------------------------------------------------------------------------------------------------------------------------------------------------------------------------------------------------------------------------------------------------------------------------------------------|-----|
| Immunological Disease | immunological disorder                    | immunological disorder of humans                      | 1,20E-08 | NCF1C, NOD2, P2RY13, PLA2G7, PRF1, PRKCB, PSMB9, PTPN22, PTPRC, RAC2, RUNX3, S100A8, SAA1, SELL, SERPINA3, SH2D1A, SIRPG, SP140, STAT1, STAT4, TAC1, TAGAP, TAP1, TCIRG1, THEMIS, TIMP1, TLR7, TLR8 (includes EG:51311), TNFRSF17, TNFRSF25, TNFRSF1B, TNFSF13B, TYROBP, UBASH3A, UCP2, VAV1, WARS, WAS, XCL1, ZAP70                                                                                                                                                                                                                                                                                                                                                                                                                                                                                                                                                                                                            | 10  |
| Immunological Disease | autoimmune disease                        | autoimmune disease of mammalia                        | 1,52E-23 | C2, CASP1, CCR5, CYBB, HLA-DQB1, HLA-DRB1, ICOS, IL1RN, JAK3, NCF1C                                                                                                                                                                                                                                                                                                                                                                                                                                                                                                                                                                                                                                                                                                                                                                                                                                                             | 42  |
| Immunological Disease | autoimmune disease                        | autoimmune disease of rodents                         | 1,65E-22 | BTK, BTLA, C2, C3, C1QA, C3AR1, CASP1, CCL2, CCL5, CCR2, CCR5, CD4, CD22, CD28, CD86, CD1D, CIITA, CXCL10, CXCR3, DEF6, HLA-DQA1, HLA-DQB1, HLA-DRB1, ICOS, IDO1, IGHG1, IL1RN, IL27RA, IL7R, IRF4, ITGAL, JAK3, LTB, NCF1, SELL, SH2D1A, STAT1, STAT4, TAP1, TYROBP, UBASH3A, UCP2                                                                                                                                                                                                                                                                                                                                                                                                                                                                                                                                                                                                                                             | 40  |
| Immunological Disease | autoimmune disease                        | autoimmune disease of mice                            | 1,17E-20 | BTK, BTLA, C3, C1QA, C3AR1, CASP1, CCL2, CCL5, CCR2, CCR5, CD4, CD22, CD28, CD86, CD1D, CIITA, CXCL10, DEF6, HLA-DQA1, HLA-DQB1, ICOS, IDO1, IL1RN, IL27RA, IL7R, IRF4, ITGAL, JAK3, NCF1, SELL, SH2D1A, STAT1, STAT4, TAP1, TYROBP, UBASH3A, UCP2                                                                                                                                                                                                                                                                                                                                                                                                                                                                                                                                                                                                                                                                              | 37  |
| Immunological Disease | autoimmune disease                        | autoimmune disease                                    | 2,67E-18 | ADAM8, AG2, AIF1, ALOX5, AMICA1, BTK, BTLA, BTN3A2, C2, C3, C1QA, C3AR1, CASP1, CCL2, CCL3, CCL4, CCL5, CCL11, CCL18, CCL19, CCL20, CCL21, CCR2, CCR5, CCRL2, CD2, CD4, CD6, CD19, CD22, CD28, CD53, CD69, CD86, CD1D, CD3D, CD79A, CIITA, CR2, CSF2RB, CSF3R, CXCL1, CXCL2, CXCL6, CXCL9, CXCL10, CXCL13, CXCR3, DEF6, FCN1, FCRL3, GABBR1, GBP2, GNLY, GPSM3, GRN, GZMA, GZMB, HCK, HCLS1, HCP5, HLA-DMB, HLA-DOA, HLA-DOB, HLA-DPA1, HLA-DPB1, HLA-DQA1, HLA-DQB1, HLA-DRB1, HLA-F, ICOS, IDO1, IFITM1, IGHG1, IGHM, IGL@, IKZF1, IL16, IL10RA, IL1B, IL1RN, IL27RA, IL2RB, IL7R, IRF1, IRF4, ITGAL, ITGB2, JAK3, KLRB1, LCP1, LST1, LTB, LTF, LYZ, MS4A1, MS4A7, NCF1, NCF4, NOD2, P2RY13, PRKCB, PSMB9, PTPN22, PTPRC, S100A8, SAA1, SELL, SERPINA3, SH2D1A, SIRPG, SP140, STAT1, STAT4, TAC1, TAGAP, TAP1, THEMIS, TIMP1, TLR7, TLR8 (includes EG:51311), TNFRSF17, TNFRSF1B, TNFSF13B, TYROBP, UBASH3A, UCP2, WARS, XCL1 | 129 |
| Immunological Disease | Sjogren's syndrome                        | Sjogren's syndrome                                    | 2,06E-16 | C3, CCL4, CCL5, CCL11, CCL18, CCL19, CCL20, CCL21, CCR5, CD6, CXCL6, CXCL10, CXCL13, IFITM1, IRF1, ITGAL, MS4A1, STAT1, TIMP1, TLR8 (includes EG:51311), TNFRSF17, TNFSF13B, XCL1                                                                                                                                                                                                                                                                                                                                                                                                                                                                                                                                                                                                                                                                                                                                               | 23  |
| Immunological Disease | graft-vs-host disease                     | graft-vs-host disease                                 | 2,16E-15 | ADA, CCR5, CD2, CD52, CD247, CD3D, CD3E, CD3G, CSF2RB, CSF3R, ICOS, IL1RN, IL2RB, IL2RG, MS4A1, PRF1                                                                                                                                                                                                                                                                                                                                                                                                                                                                                                                                                                                                                                                                                                                                                                                                                            | 16  |
| Immunological Disease | experimental autoimmune encephalomyelitis | experimental autoimmune encephalomyelitis of organism | 4,41E-15 | BTLA, C3, C3AR1, CASP1, CCL3, CCR2, CD28, CD86, CD1D, CXCL10, HLA-DQA1, HLA-DQB1, ICOS, IDO1, IGHG1, IL1RN, IL27RA, IRF4, ITGAL, LTB, NCF1, SELL, STAT1, STAT4, TYROBP, UBASH3A                                                                                                                                                                                                                                                                                                                                                                                                                                                                                                                                                                                                                                                                                                                                                 | 26  |
| Immunological Disease | experimental autoimmune encephalomyelitis | experimental autoimmune encephalomyelitis of rodents  | 1,54E-13 | BTLA, C3, C3AR1, CASP1, CCR2, CD28, CD86, CD1D, CXCL10, HLA-DQA1, HLA-DQB1, ICOS, IDO1, IGHG1, IL27RA, IRF4, ITGAL, LTB, NCF1, SELL, STAT1, STAT4, TYROBP, UBASH3A                                                                                                                                                                                                                                                                                                                                                                                                                                                                                                                                                                                                                                                                                                                                                              | 24  |
| Immunological Disease | experimental autoimmune encephalomyelitis | experimental autoimmune encephalomyelitis of mice     | 2,82E-12 | BTLA, C3, C3AR1, CASP1, CCR2, CD28, CD86, CD1D, CXCL10, HLA-DQA1, HLA-DQB1, ICOS, IDO1, IL27RA, IRF4, ITGAL, NCF1, SELL, STAT1, STAT4, TYROBP, UBASH3A                                                                                                                                                                                                                                                                                                                                                                                                                                                                                                                                                                                                                                                                                                                                                                          | 22  |
| Immunological Disease | rheumatoid arthritis                      | rheumatoid arthritis                                  | 5,51E-15 | ADAM8, AG2, AIF1, ALOX5, C2, C1QA, C3AR1, CCL2, CCL3, CCL4, CCL5, CCL11, CCL18, CCL19, CCL21, CCR2, CCR5, CCRL2, CD4, CD6, CD28, CD53, CD69, CD86, CD3D, CD79A, CIITA, CR2, CSF2RB, CSF3R, CXCL1, CXCL2, CXCL6, CXCL9, CXCL10, CXCL13, DEF6, FCN1, FCRL3, GABBR1, GBP2, GNLY,                                                                                                                                                                                                                                                                                                                                                                                                                                                                                                                                                                                                                                                   | 95  |

|                       |                                  |                                   |          |                                                                                                                                                                                                                                                                                                                                                                                                                                                                                            |    |
|-----------------------|----------------------------------|-----------------------------------|----------|--------------------------------------------------------------------------------------------------------------------------------------------------------------------------------------------------------------------------------------------------------------------------------------------------------------------------------------------------------------------------------------------------------------------------------------------------------------------------------------------|----|
| Immunological Disease | immunodeficiency                 | immunodeficiency                  | 2,72E-13 | GPSM3, GRN, GZMA, GZMB, HCK, HCLS1, HLA-DMB, HLA-DOA, HLA-DOB, HLA-DPA1, HLA-DPB1, HLA-DQA1, HLA-DQB1, HLA-DRB1, ICOS, IGHG1, IGHM, IGL@, IKZF1, IL16, IL10RA, IL1B, IL1RN, IL2RB, IL7R, ITGAL, ITGB2, LCP1, LST1, LTB, LTF, LYZ, MS4A1, MS4A7, NCF4, NOD2, P2RY13, PSMB9, PTPN22, PTPRC, S100A8, SAA1, SERPINA3, SP140, STAT1, STAT4, TAC1, TAGAP, TAP1, TIMP1, TNFRSF1B, TNFSF13B, XCL1                                                                                                  | 16 |
| Immunological Disease | lymphocytic leukemia             | lymphocytic leukemia              | 3,53E-12 | ADA, CCL3, CCL4, CD14, CD19, CD22, CD52, CD86, CD247, CD3D, CD3E, CD3G, CSF2RB, CXCL13, IKZF1, IL1B, IL2RB, IL2RG, IRF4, ITGB2, LCK, MS4A1, PRKCB, TLR7, ZAP70                                                                                                                                                                                                                                                                                                                             | 25 |
| Immunological Disease | hypersensitive reaction          | hypersensitive reaction           | 2,11E-11 | CCL4, CCL5, CD2, CD4, CD86, CD1D, CYSLTR1, FCER1G, HLA-DQA1, HLA-DRB1, IGHM, IGKC, IL16, IL1RN, IL27RA, ITGAL, ITGB2, LCP2, LTB, MS4A1, NCF1, PLA2G7, RUNX3, TCIRG1, VAV1                                                                                                                                                                                                                                                                                                                  | 25 |
| Immunological Disease | hypersensitive reaction          | hypersensitive reaction of mice   | 3,87E-10 | CCL4, CD4, CD1D, FCER1G, IGHM, IGKC, IL27RA, ITGB2, LCP2, LTB, NCF1, RUNX3, TCIRG1, VAV1                                                                                                                                                                                                                                                                                                                                                                                                   | 14 |
| Immunological Disease | B-cell leukemia                  | B-cell leukemia                   | 7,38E-10 | ADA, CCL3, CCL4, CD19, CD22, CD52, CD86, CD3E, IL1B, IL2RB, IL2RG, ITGB2, LCK, MS4A1, PRKCB, TLR7, ZAP70                                                                                                                                                                                                                                                                                                                                                                                   | 17 |
| Immunological Disease | disease                          | disease of leukocytes             | 1,58E-09 | BTK, CASP1, CCL3, CCL5, CCR2, CCR5, CD4, CD86, FPR1, ICOS, IRF1, LTF, RARRES3                                                                                                                                                                                                                                                                                                                                                                                                              | 13 |
| Immunological Disease | disease                          | disease of mononuclear leukocytes | 6,19E-08 | BTK, CCL3, CCL5, CCR2, CCR5, CD4, CD86, FPR1, ICOS                                                                                                                                                                                                                                                                                                                                                                                                                                         | 9  |
| Immunological Disease | severe combined immunodeficiency | severe combined immunodeficiency  | 3,08E-09 | ADA, BTK, CD247, CD3D, IL2RG, IL7R, JAK3, PTPRC                                                                                                                                                                                                                                                                                                                                                                                                                                            | 8  |
| Immunological Disease | systemic lupus erythematosus     | systemic lupus erythematosus      | 6,67E-09 | C2, C1QA, CD19, CD22, CD86, CR2, ICOS, IL16, IL7R, MS4A1, PTPN22, PTPRC, SH2D1A, STAT4, TAP1, TNFSF13B                                                                                                                                                                                                                                                                                                                                                                                     | 16 |
| Immunological Disease | chronic B-cell leukemia          | chronic B-cell leukemia           | 8,59E-09 | ADA, CCL3, CCL4, CD22, CD52, CD86, IL1B, IL2RB, IL2RG, ITGB2, LCK, MS4A1, PRKCB, TLR7, ZAP70                                                                                                                                                                                                                                                                                                                                                                                               | 15 |
| Immunological Disease | juvenile rheumatoid arthritis    | juvenile rheumatoid arthritis     | 8,59E-09 | ALOX5, CCL3, CCL4, CCL5, CD69, CD86, GNLY, GZMA, IL1B, IL1RN, NCF4, P2RY13, PTPRC, S100A8, TNFSF13B                                                                                                                                                                                                                                                                                                                                                                                        | 15 |
| Immunological Disease | infection                        | infection of leukocytes           | 1,20E-08 | CASP1, CCL3, CCL5, CCR2, CCR5, CD4, FPR1, IRF1, LTF, RARRES3                                                                                                                                                                                                                                                                                                                                                                                                                               | 10 |
| Immunological Disease | eosinophilia                     | eosinophilia                      | 3,00E-08 | ALOX5, CCL3, CCL11, CD4, CD86, CD247, CD3G, CPA3, CTSS, CXCL9, CYSLTR1, DEF6, IL2RG, ITK, LCK, PRF1                                                                                                                                                                                                                                                                                                                                                                                        | 16 |
| Immunological Disease | contact dermatitis               | contact dermatitis                | 4,65E-08 | CD4, CD1D, FCER1G, IGHM, IGKC, IL16, ITGB2, LCP2, LTB                                                                                                                                                                                                                                                                                                                                                                                                                                      | 9  |
| Inflammatory Disease  | inflammatory disorder            | inflammatory disorder of mammalia | 3,27E-35 | ALOX5, AOA, BTK, BTLA, C2, C3, C1QA, C3AR1, CASP1, CCL2, CCL5, CCL11, CCR2, CCR5, CD2, CD4, CD19, CD22, CD28, CD69, CD86, CD1D, CIITA, CR2, CTSS, CXCL10, CXCR3, CYBB, DEF6, FCER1G, GZMB, HCK, HLA-DQA1, HLA-DQB1, HLA-DRB1, ICOS, IDO1, IGHG1, IGHM, IGKC, IL1B, IL1RN, IL27RA, IL2RB, IRF4, ITGAL, ITGB2, ITK, JAK3, LTB, LTF, MMP7, NCF1, NCF1C, NOD2, PRF1, PTPRC, RUNX3, SELL, SH2D1A, SH2D2A, STAT1, STAT4, TAP1, TNFRSF25, TNFRSF1B, TNFSF13B, TYROBP, UBASH3A, UNC93B1, VAV1, WAS | 72 |
| Inflammatory Disease  | inflammatory disorder            | inflammatory disorder of mice     | 8,51E-33 | ALOX5, AOA, BTK, BTLA, C3, C1QA, C3AR1, CASP1, CCL2, CCL5, CCL11, CCR2, CCR5, CD2, CD4, CD19, CD22, CD28, CD69, CD86, CD1D, CIITA, CR2, CTSS, CXCL10, CYBB, DEF6, FCER1G, GZMB, HCK, HLA-DQA1, HLA-DQB1, ICOS, IDO1, IGHG1, IGHM, IGKC, IL1B, IL1RN, IL27RA, IL2RB, IRF4, ITGAL, ITGB2, ITK, JAK3, LTB, LTF, MMP7, NCF1, NCF1C, PRF1, PTPRC, RUNX3, SELL, SH2D1A, SH2D2A, STAT1, STAT4, TAP1, TNFRSF25, TNFRSF1B, TNFSF13B, TYROBP, UBASH3A, VAV1, WAS                                     | 67 |

|                      |                       |                                  |          |                                                                                                                                                                                                                                                                                                                                                                                                                                                                                                                                                                                                                                                                                                                                                                                                                                                                                                                                                                                                                                                                                                                                                                                               |     |
|----------------------|-----------------------|----------------------------------|----------|-----------------------------------------------------------------------------------------------------------------------------------------------------------------------------------------------------------------------------------------------------------------------------------------------------------------------------------------------------------------------------------------------------------------------------------------------------------------------------------------------------------------------------------------------------------------------------------------------------------------------------------------------------------------------------------------------------------------------------------------------------------------------------------------------------------------------------------------------------------------------------------------------------------------------------------------------------------------------------------------------------------------------------------------------------------------------------------------------------------------------------------------------------------------------------------------------|-----|
| Inflammatory Disease | inflammatory disorder | inflammatory disorder of rodents | 1,53E-32 | ALOX5, AOA, BTK, BTLA, C3, C1QA, C3AR1, CASP1, CCL2, CCL5, CCL11, CCR2, CCR5, CD2, CD4, CD19, CD22, CD28, CD69, CD86, CD1D, CIITA, CR2, CTSS, CXCL10, CXCR3, CYBB, DEF6, FCER1G, GZMB, HCK, HLA-DQA1, HLA-DQB1, ICOS, IDO1, IGHG1, IGHM, IGKC, IL1B, IL1RN, IL27RA, IL2RB, IRF4, ITGAL, ITGB2, ITK, JAK3, LTB, LTF, MMP7, NCF1, NCF1C, PRF1, PTPRC, RUNX3, SELL, SH2D1A, SH2D2A, STAT1, STAT4, TAP1, TNFRSF25, TNFRSF1B, TNFSF13B, TYROBP, UBASH3A, VAV1, WAS                                                                                                                                                                                                                                                                                                                                                                                                                                                                                                                                                                                                                                                                                                                                 | 68  |
| Inflammatory Disease | inflammatory disorder | inflammatory disorder            | 1,43E-23 | ADA, ADAM8, AG2, AIF1, ALOX5, AOA, BCL2A1, BIRC3, BTK, BTLA, C2, C3, C15ORF48, C1QA, C3AR1, CASP1, CCL2, CCL3, CCL4, CCL5, CCL11, CCL18, CCL19, CCL21, CCR2, CCR5, CCR7, CCRL2, CD2, CD4, CD6, CD14, CD19, CD22, CD27, CD28, CD48, CD52, CD53, CD69, CD86, CD163, CD247, CD1D, CD3D, CD3E, CD3G, CD79A, CD8A, CIITA, CLEC7A, CPA3, CR2, CSF2RB, CSF3R, CTSS, CXCL1, CXCL2, CXCL6, CXCL9, CXCL10, CXCL13, CXCR3, CYBB, CYSLTR1, DAPP1, DEF6, DOCK2, EMR1, ERAP2, FCER1G, FCN1, FCRL3, FGB, GABBR1, GBP2, GNLY, GPM3, GRN, GZMA, GZMB, HCK, HCLS1, HLA-DMB, HLA-DOA, HLA-DOB, HLA-DPA1, HLA-DPB1, HLA-DQA1, HLA-DQB1, HLA-DRB1, HLA-F, ICOS, IDO1, IGHD, IGHG1, IGHM, IGKC, IGL@, IKZF1, IL16, IL10RA, IL18RAP, IL1B, IL1RN, IL27RA, IL2RB, IL2RG, IL7R, IMPDH1, IRF4, ITGAL, ITGB2, ITK, JAK3, KLRB1, LCK, LCP1, LCP2, LST1, LTB, LTF, LYZ, MAP4K1, MMP7, MND, MS4A1, MS4A7, NCF1, NCF4, NCF1C, NOD2, OAS2, P2RY13, PLA2G7, PRF1, PRKCB, PSMB9, PTGDS, PTPN6, PTPN22, PTPRC, RUNX3, S100A8, SAA1, SELL, SERPINA3, SH2D1A, SH2D2A, SP140, STAT1, STAT4, TAC1, TAGAP, TAP1, TDO2, TIMP1, TLR7, TLR8 (includes EG:51311), TNFRSF25, TNFRSF1B, TNFSF13B, TYROBP, UBASH3A, UNC93B1, VAV1, WAS, XCL1 | 168 |
| Inflammatory Disease | inflammatory disorder | inflammatory disorder of humans  | 4,65E-08 | C2, CASP1, HLA-DRB1, ICOS, IGHG1, IL1RN, STAT1, TNFRSF1B, UNC93B1                                                                                                                                                                                                                                                                                                                                                                                                                                                                                                                                                                                                                                                                                                                                                                                                                                                                                                                                                                                                                                                                                                                             | 9   |
| Inflammatory Disease | rheumatic disease     | rheumatic disease                | 9,52E-20 | ADAM8, AG2, AIF1, ALOX5, C2, C3, C1QA, C3AR1, CASP1, CCL2, CCL3, CCL4, CCL5, CCL11, CCL18, CCL19, CCL21, CCR2, CCR5, CCRL2, CD4, CD6, CD19, CD22, CD27, CD28, CD53, CD69, CD86, CD3D, CD79A, CIITA, CR2, CSF2RB, CSF3R, CTSS, CXCL1, CXCL2, CXCL6, CXCL9, CXCL10, CXCL13, DEF6, FCER1G, FCN1, FCRL3, FGB, GABBR1, GBP2, GNLY, GPM3, GRN, GZMA, GZMB, HCK, HCLS1, HLA-DMB, HLA-DOA, HLA-DOB, HLA-DPA1, HLA-DPB1, HLA-DQA1, HLA-DQB1, HLA-DRB1, ICOS, IGHD, IGHG1, IGHM, IGKC, IGL@, IKZF1, IL16, IL10RA, IL1B, IL1RN, IL27RA, IL2RB, IL7R, ITGAL, ITGB2, LCK, LCP1, LST1, LTB, LTF, LYZ, MAP4K1, MS4A1, MS4A7, NCF1, NCF4, NCF1C, NOD2, P2RY13, PRKCB, PSMB9, PTGDS, PTPN6, PTPN22, PTPRC, RUNX3, S100A8, SAA1, SERPINA3, SH2D1A, SP140, STAT1, STAT4, TAC1, TAGAP, TAP1, TIMP1, TLR7, TNFRSF1B, TNFSF13B, XCL1                                                                                                                                                                                                                                                                                                                                                                                | 116 |
| Inflammatory Disease | rheumatic disease     | rheumatic disease of mammalia    | 1,87E-17 | C2, C3, CASP1, CCL2, CCL5, CCR2, CD4, CD22, CD69, CIITA, CR2, CTSS, DEF6, FCER1G, HLA-DRB1, ICOS, IGHG1, IL1B, IL1RN, IL27RA, IL2RB, LTF, NCF1, NCF1C, SH2D1A, STAT1, STAT4, TAP1, TNFRSF1B, TNFSF13B                                                                                                                                                                                                                                                                                                                                                                                                                                                                                                                                                                                                                                                                                                                                                                                                                                                                                                                                                                                         | 30  |
| Inflammatory Disease | rheumatic disease     | rheumatic disease of rodents     | 4,29E-16 | C3, CASP1, CCL2, CCL5, CCR2, CD4, CD22, CD69, CIITA, CR2, CTSS, DEF6, FCER1G, ICOS, IGHG1, IL1B, IL1RN, IL27RA, IL2RB, LTF, NCF1, NCF1C, SH2D1A, STAT1, STAT4, TAP1, TNFRSF1B, TNFSF13B                                                                                                                                                                                                                                                                                                                                                                                                                                                                                                                                                                                                                                                                                                                                                                                                                                                                                                                                                                                                       | 28  |
| Inflammatory Disease | rheumatic disease     | rheumatic disease of mice        | 5,69E-16 | C3, CASP1, CCL2, CCR2, CD4, CD22, CD69, CIITA, CR2, CTSS, DEF6, FCER1G, ICOS, IGHG1, IL1B, IL1RN, IL27RA, IL2RB, LTF, NCF1, NCF1C, SH2D1A, STAT1, STAT4, TAP1, TNFRSF1B, TNFSF13B                                                                                                                                                                                                                                                                                                                                                                                                                                                                                                                                                                                                                                                                                                                                                                                                                                                                                                                                                                                                             | 27  |
| Inflammatory Disease | arthritis             | arthritis                        | 1,37E-18 | ADAM8, AG2, AIF1, ALOX5, C2, C3, C1QA, C3AR1, CASP1, CCL2, CCL3, CCL4, CCL5, CCL11, CCL18, CCL19, CCL21, CCR2, CCR5, CCRL2, CD4, CD6, CD27, CD28, CD53, CD69, CD86, CD3D, CD79A, CIITA, CR2, CSF2RB, CSF3R, CTSS, CXCL1, CXCL2, CXCL6, CXCL9, CXCL10, CXCL13, DEF6, FCER1G, FCN1, FCRL3, FGB, GABBR1, GBP2, GNLY, GPM3, GRN, GZMA, GZMB, HCK, HCLS1, HLA-DMB, HLA-DOA, HLA-DOB, HLA-DPA1, HLA-DPB1, HLA-DQA1, HLA-DQB1, HLA-DRB1, ICOS, IGHD, IGHG1, IGHM, IGKC, IGL@, IKZF1, IL16, IL10RA, IL1B, IL1RN, IL27RA, IL2RB, IL7R, ITGAL, ITGB2, LCP1, LST1, LTB, LTF, LYZ, MAP4K1, MS4A1, MS4A7, NCF1, NCF4, NCF1C, NOD2, P2RY13, PRKCB, PSMB9, PTGDS, PTPN6, PTPN22, PTPRC, RUNX3, S100A8, SAA1, SERPINA3, SP140, STAT1, STAT4, TAC1, TAGAP, TAP1, TIMP1, TNFRSF1B, TNFSF13B, XCL1                                                                                                                                                                                                                                                                                                                                                                                                               | 111 |
| Inflammatory Disease | arthritis             | arthritis of mammalia            | 1,29E-14 | C3, CASP1, CCL2, CCL5, CCR2, CD4, CD69, CIITA, CR2, CTSS, DEF6, FCER1G, HLA-DRB1, ICOS, IGHG1, IL1B, IL1RN, IL27RA, IL2RB, LTF, NCF1, NCF1C, STAT1, STAT4, TNFRSF1B, TNFSF13B                                                                                                                                                                                                                                                                                                                                                                                                                                                                                                                                                                                                                                                                                                                                                                                                                                                                                                                                                                                                                 | 26  |
| Inflammatory Disease | arthritis             | arthritis of rodents             | 5,19E-14 | C3, CASP1, CCL2, CCL5, CCR2, CD4, CD69, CIITA, CR2, CTSS, DEF6, FCER1G, ICOS, IGHG1, IL1B, IL1RN, IL27RA, IL2RB, LTF, NCF1, NCF1C, STAT1, STAT4, TNFRSF1B, TNFSF13B                                                                                                                                                                                                                                                                                                                                                                                                                                                                                                                                                                                                                                                                                                                                                                                                                                                                                                                                                                                                                           | 25  |

|                      |                                           |                                                       |          |                                                                                                                                                                                                                                                                                                                                                                                                                                                                                                                                                                                                                                                                         |    |
|----------------------|-------------------------------------------|-------------------------------------------------------|----------|-------------------------------------------------------------------------------------------------------------------------------------------------------------------------------------------------------------------------------------------------------------------------------------------------------------------------------------------------------------------------------------------------------------------------------------------------------------------------------------------------------------------------------------------------------------------------------------------------------------------------------------------------------------------------|----|
| Inflammatory Disease | arthritis                                 | arthritis of mice                                     | 7,21E-14 | C3, CASP1, CCL2, CCR2, CD4, CD69, CIITA, CR2, CTSS, DEF6, FCER1G, ICOS, IGHG1, IL1B, IL1RN, IL27RA, IL2RB, LTF, NCF1, NCF1C, STAT1, STAT4, TNFRSF1B, TNFSF13B                                                                                                                                                                                                                                                                                                                                                                                                                                                                                                           | 24 |
| Inflammatory Disease | encephalitis                              | encephalitis                                          | 1,59E-17 | ALOX5, BTLA, C3, C3AR1, CASP1, CCL3, CCR2, CD28, CD86, CD1D, CXCL10, HLA-DQA1, HLA-DQB1, ICOS, IDO1, IGHG1, IL1RN, IL27RA, IRF4, ITGAL, LTB, MS4A1, NCF1, SELL, STAT1, STAT4, TIMP1, TYROBP, UBASH3A, UNC93B1                                                                                                                                                                                                                                                                                                                                                                                                                                                           | 30 |
| Inflammatory Disease | encephalitis                              | encephalitis of mammalia                              | 7,05E-15 | ALOX5, BTLA, C3, C3AR1, CASP1, CCR2, CD28, CD86, CD1D, CXCL10, HLA-DQA1, HLA-DQB1, ICOS, IDO1, IGHG1, IL27RA, IRF4, ITGAL, LTB, NCF1, SELL, STAT1, STAT4, TYROBP, UBASH3A, UNC93B1                                                                                                                                                                                                                                                                                                                                                                                                                                                                                      | 26 |
| Inflammatory Disease | encephalitis                              | encephalitis of rodents                               | 3,31E-14 | ALOX5, BTLA, C3, C3AR1, CASP1, CCR2, CD28, CD86, CD1D, CXCL10, HLA-DQA1, HLA-DQB1, ICOS, IDO1, IGHG1, IL27RA, IRF4, ITGAL, LTB, NCF1, SELL, STAT1, STAT4, TYROBP, UBASH3A                                                                                                                                                                                                                                                                                                                                                                                                                                                                                               | 25 |
| Inflammatory Disease | encephalitis                              | encephalitis of mice                                  | 6,15E-13 | ALOX5, BTLA, C3, C3AR1, CASP1, CCR2, CD28, CD86, CD1D, CXCL10, HLA-DQA1, HLA-DQB1, ICOS, IDO1, IL27RA, IRF4, ITGAL, NCF1, SELL, STAT1, STAT4, TYROBP, UBASH3A                                                                                                                                                                                                                                                                                                                                                                                                                                                                                                           | 23 |
| Inflammatory Disease | encephalomyelitis                         | encephalomyelitis                                     | 9,26E-16 | BTLA, C3, C3AR1, CASP1, CCL3, CCR2, CD28, CD86, CD1D, CXCL10, HLA-DQA1, HLA-DQB1, ICOS, IDO1, IGHG1, IL1RN, IL27RA, IRF4, ITGAL, LTB, NCF1, SELL, STAT1, STAT4, TIMP1, TYROBP, UBASH3A                                                                                                                                                                                                                                                                                                                                                                                                                                                                                  | 27 |
| Inflammatory Disease | experimental autoimmune encephalomyelitis | experimental autoimmune encephalomyelitis of organism | 4,41E-15 | BTLA, C3, C3AR1, CASP1, CCL3, CCR2, CD28, CD86, CD1D, CXCL10, HLA-DQA1, HLA-DQB1, ICOS, IDO1, IGHG1, IL1RN, IL27RA, IRF4, ITGAL, LTB, NCF1, SELL, STAT1, STAT4, TYROBP, UBASH3A                                                                                                                                                                                                                                                                                                                                                                                                                                                                                         | 26 |
| Inflammatory Disease | experimental autoimmune encephalomyelitis | experimental autoimmune encephalomyelitis of rodents  | 1,54E-13 | BTLA, C3, C3AR1, CASP1, CCR2, CD28, CD86, CD1D, CXCL10, HLA-DQA1, HLA-DQB1, ICOS, IDO1, IGHG1, IL27RA, IRF4, ITGAL, LTB, NCF1, SELL, STAT1, STAT4, TYROBP, UBASH3A                                                                                                                                                                                                                                                                                                                                                                                                                                                                                                      | 24 |
| Inflammatory Disease | experimental autoimmune encephalomyelitis | experimental autoimmune encephalomyelitis of mice     | 2,82E-12 | BTLA, C3, C3AR1, CASP1, CCR2, CD28, CD86, CD1D, CXCL10, HLA-DQA1, HLA-DQB1, ICOS, IDO1, IL27RA, IRF4, ITGAL, NCF1, SELL, STAT1, STAT4, TYROBP, UBASH3A                                                                                                                                                                                                                                                                                                                                                                                                                                                                                                                  | 22 |
| Inflammatory Disease | rheumatoid arthritis                      | rheumatoid arthritis                                  | 5,51E-15 | ADAM8, AG2, AIF1, ALOX5, C2, C1QA, C3AR1, CCL2, CCL3, CCL4, CCL5, CCL11, CCL18, CCL19, CCL21, CCR2, CCR5, CCRL2, CD4, CD6, CD28, CD53, CD69, CD86, CD3D, CD79A, CIITA, CR2, CSF2RB, CSF3R, CXCL1, CXCL2, CXCL6, CXCL9, CXCL10, CXCL13, DEF6, FCN1, FCRL3, GABBR1, GBP2, GNLY, GPSM3, GRN, GZMA, GZMB, HCK, HCLS1, HLA-DMB, HLA-DOA, HLA-DOB, HLA-DPA1, HLA-DPB1, HLA-DQA1, HLA-DQB1, HLA-DRB1, ICOS, IGHG1, IGHM, IGL@, IKZF1, IL16, IL10RA, IL1B, IL1RN, IL2RB, IL7R, ITGAL, ITGB2, LCP1, LST1, LTB, LTF, LYZ, MS4A1, MS4A7, NCF4, NOD2, P2RY13, PSMB9, PTPN22, PTPRC, S100A8, SAA1, SERPINA3, SP140, STAT1, STAT4, TAC1, TAGAP, TAP1, TIMP1, TNFRSF1B, TNFSF13B, XCL1 | 95 |
| Inflammatory Disease | dermatitis                                | dermatitis                                            | 2,74E-12 | CASP1, CCL5, CD2, CD4, CD52, CD1D, CXCL13, CYSLTR1, FCER1G, HLA-DQA1, HLA-DRB1, IGHM, IGKC, IL16, IL1B, IL1RN, IL2RB, IL2RG, ITGAL, ITGB2, LCP2, LTB, MS4A1, STAT1                                                                                                                                                                                                                                                                                                                                                                                                                                                                                                      | 24 |
| Inflammatory Disease | colitis                                   | colitis                                               | 2,94E-12 | ALOX5, CASP1, CCR2, CCR5, CD86, CD247, CD3D, CD3E, CD3G, CXCL10, EMR1, IGHM, IL1B, IL1RN, MMP7, MS4A1, NCF1, RUNX3, S100A8, STAT4, WAS                                                                                                                                                                                                                                                                                                                                                                                                                                                                                                                                  | 21 |
| Inflammatory Disease | psoriatic arthritis                       | psoriatic arthritis                                   | 7,74E-12 | CD27, CXCL9, IGHD, IGHG1, IGHM, IGKC, ITGAL, MAP4K1, MS4A1, NOD2, PRKCB, PTPN6, RUNX3, S100A8, SAA1, TNFRSF1B                                                                                                                                                                                                                                                                                                                                                                                                                                                                                                                                                           | 16 |
| Inflammatory Disease | nephritis                                 | nephritis                                             | 9,91E-10 | C1QA, CCL4, CCL5, CD2, CD19, CD28, CD1D, CD8A, HLA-DQB1, ICOS, IL16, IL1RN, IL27RA, ITGAL, MS4A1, PTPRC, SH2D2A, TNFSF13B                                                                                                                                                                                                                                                                                                                                                                                                                                                                                                                                               | 18 |
| Inflammatory Disease | collagen-induced arthritis                | collagen-induced arthritis of mice                    | 6,34E-09 | CCR2, CD69, CR2, CTSS, ICOS, IGHG1, IL1B, IL1RN, IL2RB, STAT1, STAT4, TNFRSF1B, TNFSF13B                                                                                                                                                                                                                                                                                                                                                                                                                                                                                                                                                                                | 13 |

|                      |                                                  |                                                  |          |                                                                                                                                                                                                                                                                                                                                                                                                             |    |
|----------------------|--------------------------------------------------|--------------------------------------------------|----------|-------------------------------------------------------------------------------------------------------------------------------------------------------------------------------------------------------------------------------------------------------------------------------------------------------------------------------------------------------------------------------------------------------------|----|
| Inflammatory Disease | systemic lupus erythematosus                     | systemic lupus erythematosus                     | 6,67E-09 | C2, C1QA, CD19, CD22, CD86, CR2, ICOS, IL16, IL7R, MS4A1, PTPN22, PTPRC, SH2D1A, STAT4, TAP1, TNFSF13B                                                                                                                                                                                                                                                                                                      | 16 |
| Inflammatory Disease | juvenile rheumatoid arthritis                    | juvenile rheumatoid arthritis                    | 8,59E-09 | ALOX5, CCL3, CCL4, CCL5, CD69, CD86, GNLY, GZMA, IL1B, IL1RN, NCF4, P2RY13, PTPRC, S100A8, TNFSF13B                                                                                                                                                                                                                                                                                                         | 15 |
| Inflammatory Disease | glomerulonephritis                               | glomerulonephritis                               | 8,69E-09 | C1QA, CCL4, CCL5, CD2, CD19, CD28, CD1D, ICOS, IL16, IL1RN, IL27RA, ITGAL, MS4A1, PTPRC, SH2D2A, TNFSF13B                                                                                                                                                                                                                                                                                                   | 16 |
| Inflammatory Disease | glomerulonephritis                               | glomerulonephritis of organism                   | 4,93E-08 | C1QA, CD2, CD28, CD1D, ICOS, IL16, IL1RN, IL27RA, ITGAL, PTPRC, SH2D2A                                                                                                                                                                                                                                                                                                                                      | 11 |
| Inflammatory Disease | airway hyperresponsiveness                       | airway hyperresponsiveness of organism           | 1,09E-08 | ALOX5, C3, C3AR1, CD86, CD1D, ICOS, IGHG1, IL1RN, IL27RA, IL2RB, ITK, RUNX3, STAT4                                                                                                                                                                                                                                                                                                                          | 13 |
| Inflammatory Disease | experimentally-induced arthritis                 | experimentally-induced arthritis                 | 3,37E-08 | C3, CCL4, CCR2, CCR5, CD69, CR2, CTSS, ICOS, IGHG1, IL1B, IL1RN, IL2RB, STAT1, STAT4, TNFRSF1B, TNFSF13B                                                                                                                                                                                                                                                                                                    | 16 |
| Inflammatory Disease | experimentally-induced arthritis                 | experimentally-induced arthritis of mice         | 3,37E-08 | C3, CCR2, CD69, CR2, CTSS, ICOS, IGHG1, IL1B, IL1RN, IL2RB, STAT1, STAT4, TNFRSF1B, TNFSF13B                                                                                                                                                                                                                                                                                                                | 14 |
| Inflammatory Disease | pneumonitis                                      | pneumonitis                                      | 3,78E-08 | CCL2, CCL3, CCR2, CCR5, CD4, CD14, CD86, CIITA, CTSS, HLA-DRB1, IL16, IL1B, MS4A1, NOD2, STAT1, TNFRSF25                                                                                                                                                                                                                                                                                                    | 16 |
| Inflammatory Disease | contact dermatitis                               | contact dermatitis                               | 4,65E-08 | CD4, CD1D, FCER1G, IGHM, IGKC, IL16, ITGB2, LCP2, LTB                                                                                                                                                                                                                                                                                                                                                       | 9  |
| Cell Signaling       | mobilization                                     | mobilization of calcium                          | 9,87E-35 | BTK, C3, C3AR1, CCL2, CCL3, CCL4, CCL5, CCL11, CCL19, CCL20, CCL21, CCR2, CCR5, CCR7, CD2, CD4, CD19, CD22, CD28, CD247, CD3D, CD3E, CD3G, CLEC4C, CLEC5A, CR2, CXCL1, CXCL2, CXCL9, CXCL10, CXCL11, CXCL13, CXCR3, CYSLTR1, DEF6, FCER1G, FCGR3B, FCRL3, FPR1, IL16, ITGB2, ITK, KLRK1, LCK, LCP2, LILRB1, PTPRC, RAC2, RGS19, SAA1, SELL, SH2D2A, SLA, TAC1, TRAT1, TRD@, TYROBP, VAV1, XCL1, XCL2, ZAP70 | 61 |
| Cell Signaling       | mobilization                                     | mobilization of Ca2+                             | 5,66E-21 | BTK, C3, CCL2, CCL4, CCL5, CCL21, CD4, CD19, CD22, CD247, CD3D, CD3E, CD3G, CLEC4C, CLEC5A, CXCL9, CXCL10, CXCL11, CXCL13, CXCR3, FPR1, ITGB2, KLRK1, LCK, SELL, TAC1, TRAT1, TYROBP, VAV1, XCL1, ZAP70                                                                                                                                                                                                     | 31 |
| Cell Signaling       | flux                                             | flux of calcium                                  | 3,71E-26 | BTK, CCL2, CCL3, CCL4, CCL5, CCL11, CCL19, CCL20, CCL21, CCR2, CCR5, CD2, CD4, CD19, CD22, CD28, CD247, CD300A, CD3E, CD8A, CXCL1, CXCL10, CXCL13, CYSLTR1, DARC, FCER1G, FCGR3B, FGR, FPR1, FPR3, HCK, ICOS, IGHM, IL1B, ITGB2, ITK, LAX1, LCP2, LILRB1, MS4A1, PRF1, PRKCB, RAC2, VAV1                                                                                                                    | 44 |
| Cell Signaling       | flux                                             | flux of Ca2+                                     | 4,60E-11 | CCL2, CCL3, CCL4, CCL5, CCL11, CCR5, CD19, CD22, CD28, CD3E, CXCL1, ICOS, IL1B, ITGB2, MS4A1, PRF1, PRKCB, VAV1                                                                                                                                                                                                                                                                                             | 18 |
| Cell Signaling       | tyrosine phosphorylation                         | tyrosine phosphorylation of protein              | 1,46E-19 | CCL3, CCL4, CCL5, CCL11, CD2, CD4, CD19, CD28, CD48, CD247, CD3E, CD79A, CD8A, CLEC4C, CSF1R, FCER1G, FCRL3, FCRL5, HCK, IGHM, IL1B, ITGB2, JAK3, LAX1, LCK, PTPN6, PTPN22, PTPRC, SELL, SH2D1A, SPIB, TAC1, TYROBP, ZAP70                                                                                                                                                                                  | 34 |
| Cell Signaling       | quantity                                         | quantity of calcium                              | 2,36E-16 | BTK, C3, C3AR1, CCL2, CCL3, CCL4, CCL5, CCL11, CCL19, CCL20, CCL21, CCR5, CD2, CD19, CD22, CD28, CD247, CD3E, CD8A, CXCL9, CXCL10, CXCL11, CXCL13, CXCR3, DARC, FCER1G, FCGR3B, FPR1, IGHM, IGKC, IL1B, LCK, LCP2, LYZ, PRKCB, PTPN6, PTPRC, RGS1, S100A8, SAA1, SELL, TAC1, VAV1, WAS                                                                                                                      | 44 |
| Cell Signaling       | quantity                                         | quantity of Ca2+                                 | 5,18E-12 | BTK, C3AR1, CCL2, CCL4, CCL5, CCL11, CCR2, CCR5, CCR7, CD19, CD22, CD28, CD52, CXCL9, CXCL10, CXCL11, CXCL13, CXCR3, CYSLTR1, FPR1, IL1B, JAK3, LCK, LYZ, PRKCB, PTPN6, PTPRC, RGS1, SAA1, TAC1, VAV1                                                                                                                                                                                                       | 31 |
| Cell Signaling       | cell surface receptor linked signal transduction | cell surface receptor linked signal transduction | 3,48E-16 | BIRC3, BTLA, CCR2, CD2, CD4, CD14, CD19, CD22, CD28, CD247, CD3E, CD3G, CD79A, CD8A, CXCL10, CYSLTR1, FCER1G, IFITM1, IL12RB1, IL18RAP, IL27RA, IL2RB, IL7R, ITGAL, JAK3, KLRB1, LCK, LCP2, LILRA1, LY96, P2RX5, PTPN6, PTPRC, STAT1, STAT4, TNFRSF25, TNFRSF1B                                                                                                                                             | 37 |

|                                |              |                                  |          |                                                                                                                                                                                                                                                                                                                                                                                                             |    |
|--------------------------------|--------------|----------------------------------|----------|-------------------------------------------------------------------------------------------------------------------------------------------------------------------------------------------------------------------------------------------------------------------------------------------------------------------------------------------------------------------------------------------------------------|----|
|                                | on           |                                  |          |                                                                                                                                                                                                                                                                                                                                                                                                             |    |
| Cell Signaling                 | release      | release of calcium               | 2,52E-10 | CCL3, CCL4, CCL5, CCL11, CCR5, CD4, CD19, CD28, CSF1R, FCER1G, FGB, FPR1, FPR3, HCST, IGHM, IL1B, ITK, LCK, PTPRC, RGS1, VAV1, XCL1                                                                                                                                                                                                                                                                         | 22 |
| Cell Signaling                 | influx       | influx of calcium                | 3,50E-08 | BTK, CCL3, CCL4, CCL5, CCL11, CCR5, CD19, CD22, CD28, CD300A, CXCL13, FCGR3B, FPR1, IGHM, IL1B, ITK, PRKCB                                                                                                                                                                                                                                                                                                  | 17 |
| Cell Signaling                 | signaling    | signaling of calcium             | 7,28E-08 | ADA, CD4, CD3E, CD8A, CXCL9, CXCR3, GABBR1, ITGAL, TRAT1, VAV1, ZAP70                                                                                                                                                                                                                                                                                                                                       | 11 |
| Molecular Transport            | mobilization | mobilization of calcium          | 9,87E-35 | BTK, C3, C3AR1, CCL2, CCL3, CCL4, CCL5, CCL11, CCL19, CCL20, CCL21, CCR2, CCR5, CCR7, CD2, CD4, CD19, CD22, CD28, CD247, CD3D, CD3E, CD3G, CLEC4C, CLEC5A, CR2, CXCL1, CXCL2, CXCL9, CXCL10, CXCL11, CXCL13, CXCR3, CYSLTR1, DEF6, FCER1G, FCGR3B, FCRL3, FPR1, IL16, ITGB2, ITK, KLRK1, LCK, LCP2, LILRB1, PTPRC, RAC2, RGS19, SAA1, SELL, SH2D2A, SLA, TAC1, TRAT1, TRD@, TYROBP, VAV1, XCL1, XCL2, ZAP70 | 61 |
| Molecular Transport            | mobilization | mobilization of Ca <sup>2+</sup> | 5,66E-21 | BTK, C3, CCL2, CCL4, CCL5, CCL21, CD4, CD19, CD22, CD247, CD3D, CD3E, CD3G, CLEC4C, CLEC5A, CXCL9, CXCL10, CXCL11, CXCL13, CXCR3, FPR1, ITGB2, KLRK1, LCK, SELL, TAC1, TRAT1, TYROBP, VAV1, XCL1, ZAP70                                                                                                                                                                                                     | 31 |
| Molecular Transport            | flux         | flux of calcium                  | 3,71E-26 | BTK, CCL2, CCL3, CCL4, CCL5, CCL11, CCL19, CCL20, CCL21, CCR2, CCR5, CD2, CD4, CD19, CD22, CD28, CD247, CD300A, CD3E, CD8A, CXCL1, CXCL10, CXCL13, CYSLTR1, DARC, FCER1G, FCGR3B, FGR, FPR1, FPR3, HCK, ICOS, IGHM, IL1B, ITGB2, ITK, LAX1, LCP2, LILRB1, MS4A1, PRF1, PRKCB, RAC2, VAV1                                                                                                                    | 44 |
| Molecular Transport            | flux         | flux of inorganic cation         | 4,04E-11 | CCL2, CCL3, CCL4, CCL5, CCL11, CCR5, CD19, CD22, CD28, CD3E, CXCL1, ICOS, IL1B, ITGB2, MS4A1, PRF1, PRKCB, UCP2, VAV1                                                                                                                                                                                                                                                                                       | 19 |
| Molecular Transport            | flux         | flux of Ca <sup>2+</sup>         | 4,60E-11 | CCL2, CCL3, CCL4, CCL5, CCL11, CCR5, CD19, CD22, CD28, CD3E, CXCL1, ICOS, IL1B, ITGB2, MS4A1, PRF1, PRKCB, VAV1                                                                                                                                                                                                                                                                                             | 18 |
| Molecular Transport            | quantity     | quantity of calcium              | 2,36E-16 | BTK, C3, C3AR1, CCL2, CCL3, CCL4, CCL5, CCL11, CCL19, CCL20, CCL21, CCR5, CD2, CD19, CD22, CD28, CD247, CD3E, CD8A, CXCL9, CXCL10, CXCL11, CXCL13, CXCR3, DARC, FCER1G, FCGR3B, FPR1, IGHM, IGKC, IL1B, LCK, LCP2, LYZ, PRKCB, PTPN6, PTPRC, RGS1, S100A8, SAA1, SELL, TAC1, VAV1, WAS                                                                                                                      | 44 |
| Molecular Transport            | quantity     | quantity of Ca <sup>2+</sup>     | 5,18E-12 | BTK, C3AR1, CCL2, CCL4, CCL5, CCL11, CCR2, CCR5, CCR7, CD19, CD22, CD28, CD52, CXCL9, CXCL10, CXCL11, CXCL13, CXCR3, CYSLTR1, FPR1, IL1B, JAK3, LCK, LYZ, PRKCB, PTPN6, PTPRC, RGS1, SAA1, TAC1, VAV1                                                                                                                                                                                                       | 31 |
| Molecular Transport            | release      | release of calcium               | 2,52E-10 | CCL3, CCL4, CCL5, CCL11, CCR5, CD4, CD19, CD28, CSF1R, FCER1G, FGB, FPR1, FPR3, HCST, IGHM, IL1B, ITK, LCK, PTPRC, RGS1, VAV1, XCL1                                                                                                                                                                                                                                                                         | 22 |
| Molecular Transport            | influx       | influx of calcium                | 3,50E-08 | BTK, CCL3, CCL4, CCL5, CCL11, CCR5, CD19, CD22, CD28, CD300A, CXCL13, FCGR3B, FPR1, IGHM, IL1B, ITK, PRKCB                                                                                                                                                                                                                                                                                                  | 17 |
| Vitamin and Mineral Metabolism | mobilization | mobilization of calcium          | 9,87E-35 | BTK, C3, C3AR1, CCL2, CCL3, CCL4, CCL5, CCL11, CCL19, CCL20, CCL21, CCR2, CCR5, CCR7, CD2, CD4, CD19, CD22, CD28, CD247, CD3D, CD3E, CD3G, CLEC4C, CLEC5A, CR2, CXCL1, CXCL2, CXCL9, CXCL10, CXCL11, CXCL13, CXCR3, CYSLTR1, DEF6, FCER1G, FCGR3B, FCRL3, FPR1, IL16, ITGB2, ITK, KLRK1, LCK, LCP2, LILRB1, PTPRC, RAC2, RGS19, SAA1, SELL, SH2D2A, SLA, TAC1, TRAT1, TRD@, TYROBP, VAV1, XCL1, XCL2, ZAP70 | 61 |
| Vitamin and Mineral Metabolism | mobilization | mobilization of Ca <sup>2+</sup> | 5,66E-21 | BTK, C3, CCL2, CCL4, CCL5, CCL21, CD4, CD19, CD22, CD247, CD3D, CD3E, CD3G, CLEC4C, CLEC5A, CXCL9, CXCL10, CXCL11, CXCL13, CXCR3, FPR1, ITGB2, KLRK1, LCK, SELL, TAC1, TRAT1, TYROBP, VAV1, XCL1, ZAP70                                                                                                                                                                                                     | 31 |
| Vitamin and Mineral Metabolism | flux         | flux of calcium                  | 3,71E-26 | BTK, CCL2, CCL3, CCL4, CCL5, CCL11, CCL19, CCL20, CCL21, CCR2, CCR5, CD2, CD4, CD19, CD22, CD28, CD247, CD300A, CD3E, CD8A, CXCL1, CXCL10, CXCL13, CYSLTR1, DARC, FCER1G, FCGR3B, FGR, FPR1, FPR3, HCK, ICOS, IGHM, IL1B, ITGB2, ITK, LAX1, LCP2, LILRB1, MS4A1, PRF1, PRKCB, RAC2, VAV1                                                                                                                    | 44 |
| Vitamin and Mineral Metabolism | flux         | flux of Ca <sup>2+</sup>         | 4,60E-11 | CCL2, CCL3, CCL4, CCL5, CCL11, CCR5, CD19, CD22, CD28, CD3E, CXCL1, ICOS, IL1B, ITGB2, MS4A1, PRF1, PRKCB, VAV1                                                                                                                                                                                                                                                                                             | 18 |
| Vitamin and Mineral Metabolism | quantity     | quantity of calcium              | 2,36E-16 | BTK, C3, C3AR1, CCL2, CCL3, CCL4, CCL5, CCL11, CCL19, CCL20, CCL21, CCR5, CD2, CD19, CD22, CD28, CD247, CD3E, CD8A, CXCL9, CXCL10, CXCL11, CXCL13, CXCR3, DARC, FCER1G, FCGR3B, FPR1, IGHM, IGKC, IL1B, LCK, LCP2, LYZ, PRKCB, PTPN6, PTPRC, RGS1, S100A8, SAA1, SELL, TAC1, VAV1, WAS                                                                                                                      | 44 |
| Vitamin and Mineral Metabolism | quantity     | quantity of Ca <sup>2+</sup>     | 5,18E-12 | BTK, C3AR1, CCL2, CCL4, CCL5, CCL11, CCR2, CCR5, CCR7, CD19, CD22, CD28, CD52, CXCL9, CXCL10, CXCL11, CXCL13, CXCR3, CYSLTR1, FPR1, IL1B, JAK3,                                                                                                                                                                                                                                                             | 31 |



|                                |            |                                |          |                                                                                                                                                                                                                                                                                                                                                                                                                                                                                                                                                                                                                                                                                                                                                                                                                                                                                                                                          |     |
|--------------------------------|------------|--------------------------------|----------|------------------------------------------------------------------------------------------------------------------------------------------------------------------------------------------------------------------------------------------------------------------------------------------------------------------------------------------------------------------------------------------------------------------------------------------------------------------------------------------------------------------------------------------------------------------------------------------------------------------------------------------------------------------------------------------------------------------------------------------------------------------------------------------------------------------------------------------------------------------------------------------------------------------------------------------|-----|
| Mineral Metabolism             |            |                                |          | LCK, LYZ, PRKCB, PTPN6, PTPRC, RGS1, SAA1, TAC1, VAV1                                                                                                                                                                                                                                                                                                                                                                                                                                                                                                                                                                                                                                                                                                                                                                                                                                                                                    |     |
| Vitamin and Mineral Metabolism | release    | release of calcium             | 2,52E-10 | CCL3, CCL4, CCL5, CCL11, CCR5, CD4, CD19, CD28, CSF1R, FCER1G, FGB, FPR1, FPR3, HCST, IGHM, IL1B, ITK, LCK, PTPRC, RGS1, VAV1, XCL1                                                                                                                                                                                                                                                                                                                                                                                                                                                                                                                                                                                                                                                                                                                                                                                                      | 22  |
| Vitamin and Mineral Metabolism | influx     | influx of calcium              | 3,50E-08 | BTK, CCL3, CCL4, CCL5, CCL11, CCR5, CD19, CD22, CD28, CD300A, CXCL13, FCGR3B, FPR1, IGHM, IL1B, ITK, PRKCB                                                                                                                                                                                                                                                                                                                                                                                                                                                                                                                                                                                                                                                                                                                                                                                                                               | 17  |
| Vitamin and Mineral Metabolism | signaling  | signaling of calcium           | 7,28E-08 | ADA, CD4, CD3E, CD8A, CXCL9, CXCR3, GABBR1, ITGAL, TRAT1, VAV1, ZAP70                                                                                                                                                                                                                                                                                                                                                                                                                                                                                                                                                                                                                                                                                                                                                                                                                                                                    | 11  |
| Cell Death                     | cell death | cell death of leukocytes       | 2,32E-33 | ADA, BCL2A1, BIRC3, BTK, C1QA, CASP1, CCL3, CCL4, CCL5, CCL11, CCL19, CCR5, CD2, CD4, CD14, CD22, CD27, CD28, CD69, CD247, CD3E, CD5L, CIITA, CLEC10A, CR2, CXCL1, CXCL2, DEF6, EOMES, FCER1G, GZMA, GZMB, ICOS, IDO1, IGHM, IL1B, IL1RN, IL2RG, IL7R, IRF1, ITGAL, ITGB2, ITK, JAK3, LCK, LCN2, LILRB1, LTF, MAP4K1, MS4A1, POU2AF1, PRF1, PRKCB, PTPRC, RAC2, SH2D2A, STAT1, TCL1A, TNFRSF17, TNFRSF25, TNFRSF1B, TNFSF13B, WAS, XCL1                                                                                                                                                                                                                                                                                                                                                                                                                                                                                                  | 64  |
| Cell Death                     | cell death | cell death of lymphocytes      | 5,26E-27 | ADA, BCL2A1, BTK, CASP1, CCL3, CCL4, CCL5, CCL11, CCL19, CCR5, CD2, CD4, CD22, CD27, CD28, CD247, CD3E, CIITA, CLEC10A, CR2, DEF6, EOMES, GZMA, GZMB, ICOS, IDO1, IGHM, IL1B, IL2RG, IL7R, ITGAL, ITK, JAK3, LCK, MAP4K1, MS4A1, POU2AF1, PRF1, PRKCB, PTPRC, RAC2, SH2D2A, STAT1, TCL1A, TNFRSF17, TNFRSF25, TNFRSF1B, TNFSF13B, WAS, XCL1                                                                                                                                                                                                                                                                                                                                                                                                                                                                                                                                                                                              | 50  |
| Cell Death                     | cell death | cell death of T lymphocytes    | 7,64E-22 | ADA, BCL2A1, CASP1, CCL3, CCL4, CCL5, CCL19, CCR5, CD2, CD4, CD27, CD28, CD247, CD3E, CIITA, CLEC10A, DEF6, EOMES, GZMA, GZMB, ICOS, IDO1, IGHM, IL1B, IL2RG, IL7R, ITK, JAK3, LCK, MAP4K1, PRF1, PTPRC, RAC2, SH2D2A, STAT1, TCL1A, TNFRSF25, TNFRSF1B, WAS, XCL1                                                                                                                                                                                                                                                                                                                                                                                                                                                                                                                                                                                                                                                                       | 40  |
| Cell Death                     | cell death | cell death of normal cells     | 2,11E-18 | ADA, BCL2A1, BIRC3, BTK, C3, C1QA, CASP1, CCL3, CCL4, CCL5, CCL11, CCL19, CCR2, CCR5, CD2, CD4, CD14, CD22, CD27, CD28, CD69, CD247, CD1D, CD3E, CD5L, CIITA, CLEC10A, CR2, CSF1R, CTSS, CXCL1, CXCL2, CYBB, DEF6, EOMES, FCER1G, GABBR1, GZMA, GZMB, ICOS, IDO1, IGHG1, IGHM, IL1B, IL1RN, IL27RA, IL2RG, IL7R, IRF1, ITGAL, ITGB2, ITK, JAK3, LCK, LCN2, LILRB1, LTB, LTF, MAP4K1, MGC29506, MMP7, MS4A1, NCF1, PLA2G7, POU2AF1, PRF1, PRKCB, PTGDS, PTPRC, RAC2, RASSF5, RUNX3, SAA1, SERPINA3, SH2D2A, STAT1, TAC1, TCL1A, TIMP1, TNFRSF17, TNFRSF25, TNFRSF1B, TNFSF13B, UCP2, WAS, XAF1, XCL1                                                                                                                                                                                                                                                                                                                                      | 87  |
| Cell Death                     | cell death | cell death                     | 7,21E-17 | ADA, AIF1, AIM2, ALOX5, BCL11B, BCL2A1, BIRC3, BTK, C3, C1QA, CASP1, CCL2, CCL3, CCL4, CCL5, CCL11, CCL19, CCR2, CCR5, CD2, CD4, CD14, CD19, CD22, CD27, CD28, CD48, CD53, CD69, CD247, CD1D, CD3E, CD3G, CD5L, CD8A, CIITA, CLEC10A, CR2, CSF1R, CSF2RB, CSF3R, CSTA, CTSS, CXCL1, CXCL2, CXCR3, CYBB, DEF6, EOMES, FAIM3, FCER1G, FGR, GABBR1, GNLY, GPR65, GRN, GZMA, GZMB, GZMH, GZMK, HCK, HCLS1, ICAM2, ICOS, IDO1, IGHG1, IGHM, IL1B, IL1RN, IL27RA, IL2RG, IL7R, IRF1, IRF4, ITGAL, ITGB2, ITK, JAK3, LCK, LCN2, LILRB1, LSP1, LTB, LTF, LY86, LYZ, MAP4K1, MGC29506, MMP7, MS4A1, MYB (includes EG:4602), NCF1, NOD2, PHLDA2, PLA2G7, PLAC8, POU2AF1, PRF1, PRKCB, PTGDS, PTPN6, PTPN22, PTPRC, PTTG1, RAC2, RASD1, RASSF5, RGS10, RTN1, RUNX3, S100A8, SAA1, SERPINA3, SH2D2A, SLAMF1, SLC2A3, ST8SIA4, STAT1, STAT4, TAC1, TCL1A, TIMP1, TNFRSF17, TNFRSF25, TNFRSF1B, TNFSF13B, TYROBP, UBASH3A, UCP2, VAV1, WAS, XAF1, XCL1 | 133 |
| Cell Death                     | cell death | cell death of eukaryotic cells | 1,66E-16 | ADA, AIM2, ALOX5, BCL2A1, BIRC3, BTK, C3, C1QA, CASP1, CCL2, CCL3, CCL4, CCL5, CCL11, CCL19, CCR2, CCR5, CD2, CD4, CD14, CD19, CD22, CD27, CD28, CD48, CD69, CD247, CD1D, CD3E, CD5L, CD8A, CIITA, CLEC10A, CR2, CSF1R, CSF2RB, CSTA, CTSS, CXCL1, CXCL2, CXCR3, CYBB, DEF6, EOMES, FCER1G, FGR, GABBR1, GNLY, GPR65, GRN, GZMA, GZMB, GZMH, GZMK, HCK, HCLS1, ICOS, IDO1, IGHG1, IGHM, IL1B, IL1RN, IL27RA, IL2RG, IL7R, IRF1, IRF4, ITGAL, ITGB2, ITK, JAK3, LCK, LCN2, LILRB1, LSP1, LTB, LTF, MAP4K1, MGC29506, MMP7, MS4A1, MYB (includes EG:4602), NCF1, PLA2G7, PLAC8,                                                                                                                                                                                                                                                                                                                                                            | 117 |

|            |            |                                   |          |                                                                                                                                                                                                                                                                                                                                                                                                                                                                                                                                                                                                                                                                                                                                                                                                                       |     |
|------------|------------|-----------------------------------|----------|-----------------------------------------------------------------------------------------------------------------------------------------------------------------------------------------------------------------------------------------------------------------------------------------------------------------------------------------------------------------------------------------------------------------------------------------------------------------------------------------------------------------------------------------------------------------------------------------------------------------------------------------------------------------------------------------------------------------------------------------------------------------------------------------------------------------------|-----|
|            |            |                                   |          | POU2AF1, PRF1, PRKCB, PTGDS, PTPN6, PTPN22, PTPRC, PTTG1, RAC2, RASD1, RASSF5, RGS10, RTN1, RUNX3, S100A8, SAA1, SERPINA3, SH2D2A, STAT1, TAC1, TCL1A, TIMP1, TNFRSF17, TNFRSF25, TNFRSF1B, TNFSF13B, UBASH3A, UCP2, VAV1, WAS, XAF1, XCL1                                                                                                                                                                                                                                                                                                                                                                                                                                                                                                                                                                            |     |
| Cell Death | cell death | cell death of B lymphocytes       | 4,74E-11 | BCL2A1, BTK, CASP1, CCL11, CD22, CD27, CR2, GZMB, IGHM, MS4A1, POU2AF1, PRF1, PRKCB, PTPRC, TCL1A, TNFRSF17, TNFSF13B                                                                                                                                                                                                                                                                                                                                                                                                                                                                                                                                                                                                                                                                                                 | 17  |
| Cell Death | cell death | cell death of cell lines          | 8,20E-08 | AIM2, ALOX5, BCL2A1, BIRC3, BTK, CASP1, CCL2, CCL5, CCL11, CCR5, CD2, CD4, CD19, CD22, CD28, CD48, CD3E, CD8A, CSF1R, CSF2RB, CSTA, CXCR3, FGR, GNLY, GPR65, GRN, GZMB, GZMH, GZMK, HCK, HCLS1, IDO1, IGHG1, IGHM, IL1B, IL1RN, IL2RG, IRF1, IRF4, JAK3, LCK, LCN2, LSP1, LTB, MAP4K1, MGC29506, MMP7, MS4A1, MYB (includes EG:4602), PLA2G7, PLAC8, PRF1, PRKCB, PTGDS, PTPN6, PTPN22, PTPRC, PTTG1, RASD1, RASSF5, RGS10, RTN1, RUNX3, S100A8, STAT1, TIMP1, TNFRSF25, TNFRSF1B, TNFSF13B, UBASH3A, UCP2, VAV1, XAF1                                                                                                                                                                                                                                                                                                | 73  |
| Cell Death | apoptosis  | apoptosis of leukocytes           | 5,32E-29 | ADA, BCL2A1, BIRC3, BTK, C1QA, CASP1, CCL3, CCL4, CCL5, CCL11, CCR5, CD2, CD4, CD14, CD22, CD27, CD28, CD69, CD247, CD3E, CD5L, CIITA, CR2, CXCL1, CXCL2, FCER1G, GZMA, GZMB, ICOS, IGHM, IL1B, IL1RN, IL2RG, IL7R, IRF1, ITGB2, ITK, JAK3, LCK, LCN2, LILRB1, LTF, MAP4K1, POU2AF1, PRF1, PRKCB, PTPRC, RAC2, STAT1, TCL1A, TNFRSF17, TNFRSF25, TNFRSF1B, TNFSF13B, WAS, XCL1                                                                                                                                                                                                                                                                                                                                                                                                                                        | 56  |
| Cell Death | apoptosis  | apoptosis of lymphocytes          | 2,27E-22 | ADA, BCL2A1, BTK, CASP1, CCL3, CCL4, CCL5, CCL11, CCR5, CD2, CD4, CD22, CD27, CD28, CD247, CD3E, CIITA, CR2, GZMA, GZMB, ICOS, IGHM, IL1B, IL2RG, IL7R, ITK, JAK3, LCK, MAP4K1, POU2AF1, PRF1, PRKCB, PTPRC, RAC2, STAT1, TCL1A, TNFRSF17, TNFRSF25, TNFRSF1B, TNFSF13B, WAS, XCL1                                                                                                                                                                                                                                                                                                                                                                                                                                                                                                                                    | 42  |
| Cell Death | apoptosis  | apoptosis of T lymphocytes        | 1,06E-17 | ADA, BCL2A1, CASP1, CCL3, CCL4, CCL5, CCR5, CD2, CD4, CD27, CD28, CD247, CD3E, CIITA, GZMA, GZMB, ICOS, IL1B, IL2RG, IL7R, ITK, JAK3, LCK, MAP4K1, PRF1, PTPRC, RAC2, STAT1, TCL1A, TNFRSF25, TNFRSF1B, WAS, XCL1                                                                                                                                                                                                                                                                                                                                                                                                                                                                                                                                                                                                     | 33  |
| Cell Death | apoptosis  | apoptosis of eukaryotic cells     | 3,84E-16 | ADA, AIM2, ALOX5, BCL2A1, BIRC3, BTK, C3, C1QA, CASP1, CCL3, CCL4, CCL5, CCL11, CCR2, CCR5, CD2, CD4, CD14, CD19, CD22, CD27, CD28, CD48, CD69, CD247, CD1D, CD3E, CD5L, CD8A, CIITA, CR2, CSF1R, CSF2RB, CSTA, CTSS, CXCL1, CXCL2, CXCR3, FCER1G, FGR, GABBR1, GNLY, GPR65, GRN, GZMA, GZMB, HCK, HCLS1, ICOS, IDO1, IGHG1, IGHM, IL1B, IL1RN, IL2RG, IL7R, IRF1, IRF4, ITGB2, ITK, JAK3, LCK, LCN2, LILRB1, LSP1, LTF, MAP4K1, MGC29506, MMP7, MS4A1, MYB (includes EG:4602), NCF1, PLA2G7, PLAC8, POU2AF1, PRF1, PRKCB, PTGDS, PTPN6, PTPN22, PTPRC, PTTG1, RAC2, RASD1, RASSF5, RTN1, RUNX3, S100A8, SAA1, SERPINA3, STAT1, TAC1, TCL1A, TIMP1, TNFRSF17, TNFRSF25, TNFRSF1B, TNFSF13B, UBASH3A, VAV1, WAS, XAF1, XCL1                                                                                            | 103 |
| Cell Death | apoptosis  | apoptosis of normal cells         | 4,24E-16 | ADA, BCL2A1, BIRC3, BTK, C3, C1QA, CASP1, CCL3, CCL4, CCL5, CCL11, CCR2, CCR5, CD2, CD4, CD14, CD22, CD27, CD28, CD69, CD247, CD1D, CD3E, CD5L, CIITA, CR2, CSF1R, CTSS, CXCL1, CXCL2, FCER1G, GABBR1, GZMA, GZMB, ICOS, IGHG1, IGHM, IL1B, IL1RN, IL2RG, IL7R, IRF1, ITGB2, ITK, JAK3, LCK, LCN2, LILRB1, LTF, MAP4K1, MMP7, NCF1, PLA2G7, POU2AF1, PRF1, PRKCB, PTGDS, PTPRC, RAC2, RUNX3, SAA1, SERPINA3, STAT1, TAC1, TCL1A, TIMP1, TNFRSF17, TNFRSF25, TNFRSF1B, TNFSF13B, WAS, XAF1, XCL1                                                                                                                                                                                                                                                                                                                       | 73  |
| Cell Death | apoptosis  | apoptosis                         | 1,51E-15 | ADA, AIM2, ALOX5, BCL11B, BCL2A1, BIRC3, BTK, C3, C1QA, CASP1, CCL3, CCL4, CCL5, CCL11, CCR2, CCR5, CD2, CD4, CD14, CD19, CD22, CD27, CD28, CD48, CD53, CD69, CD247, CD1D, CD3E, CD3G, CD5L, CD8A, CIITA, CR2, CSF1R, CSF2RB, CSTA, CTSS, CXCL1, CXCL2, CXCR3, FAIM3, FCER1G, FGR, GABBR1, GNLY, GPR65, GRN, GZMA, GZMB, HCK, HCLS1, ICAM2, ICOS, IDO1, IGHG1, IGHM, IL1B, IL1RN, IL2RG, IL7R, IRF1, IRF4, ITGB2, ITK, JAK3, LCK, LCN2, LILRB1, LSP1, LTB, LTF, LY86, MAP4K1, MGC29506, MMP7, MS4A1, MYB (includes EG:4602), NCF1, NOD2, PHLDA2, PLA2G7, PLAC8, POU2AF1, PRF1, PRKCB, PTGDS, PTPN6, PTPN22, PTPRC, PTTG1, RAC2, RASD1, RASSF5, RTN1, RUNX3, S100A8, SAA1, SERPINA3, SLAMF1, SLC2A3, ST8SIA4, STAT1, STAT4, TAC1, TCL1A, TIMP1, TNFRSF17, TNFRSF25, TNFRSF1B, TNFSF13B, UBASH3A, VAV1, WAS, XAF1, XCL1 | 116 |
| Cell Death | apoptosis  | apoptosis of B lymphocytes        | 9,29E-11 | BCL2A1, BTK, CASP1, CCL11, CD22, CD27, CR2, GZMB, IGHM, POU2AF1, PRF1, PRKCB, PTPRC, TCL1A, TNFRSF17, TNFSF13B                                                                                                                                                                                                                                                                                                                                                                                                                                                                                                                                                                                                                                                                                                        | 16  |
| Cell Death | apoptosis  | apoptosis of leukocyte cell lines | 2,54E-09 | BCL2A1, BIRC3, CCL5, CCL11, CCR5, CD2, CD19, CD3E, CD8A, GZMB, HCLS1, IGHM, IRF4, LCN2, MGC29506, MS4A1, MYB (includes EG:4602), PLAC8, PTPN6, PTPRC, TNFRSF25, TNFRSF1B                                                                                                                                                                                                                                                                                                                                                                                                                                                                                                                                                                                                                                              | 22  |

|            |              |                                      |          |                                                                                                                                                                                                                                                                                                                                                                                                                                                                |    |
|------------|--------------|--------------------------------------|----------|----------------------------------------------------------------------------------------------------------------------------------------------------------------------------------------------------------------------------------------------------------------------------------------------------------------------------------------------------------------------------------------------------------------------------------------------------------------|----|
| Cell Death | apoptosis    | apoptosis of phagocytes              | 2,57E-08 | BCL2A1, BIRC3, C1QA, CASP1, CCL5, CD14, CD5L, CXCL1, CXCL2, IL1B, IL1RN, IRF1, ITGB2, LTF, TNFRSF1B                                                                                                                                                                                                                                                                                                                                                            | 15 |
| Cell Death | apoptosis    | apoptosis of cell lines              | 7,58E-08 | AIM2, ALOX5, BCL2A1, BIRC3, BTK, CASP1, CCL5, CCL11, CCR5, CD2, CD4, CD19, CD28, CD48, CD3E, CD8A, CSF1R, CSF2RB, CSTA, CXCR3, FGR, GNLY, GPR65, GRN, GZMB, HCK, HCLS1, IDO1, IGHM, IL1B, IL2RG, IRF1, IRF4, JAK3, LCK, LCN2, LSP1, MAP4K1, MGC29506, MMP7, MS4A1, MYB (includes EG:4602), PLA2G7, PLAC8, PRF1, PRKCB, PTGDS, PTPN6, PTPN22, PTPRC, PTTG1, RASD1, RASSF5, RTN1, RUNX3, S100A8, STAT1, TIMP1, TNFRSF25, TNFRSF1B, TNFSF13B, UBASH3A, VAV1, XAF1 | 64 |
| Cell Death | cytotoxicity | cytotoxicity of cells                | 2,05E-28 | CASP1, CCL2, CCL5, CCL11, CD2, CD6, CD27, CD28, CD48, CD69, CD96, CD1D, CD300A, CYBB, FCER1G, FCGR3B, FGR, GZMA, GZMB, HCK, HCST, HLA-DRB1, IGHG1, IMPDH1, ITGAL, ITGB2, ITK, KLRK1, LCK, PRF1, PTPN6, PTPRC, SH2D1A, SLAMF6, SLAMF7, STAT1, STAT4, TAC1, TAP1, TNFRSF1B, TYROBP, VAV1, WAS                                                                                                                                                                    | 43 |
| Cell Death | cytotoxicity | cytotoxicity of leukocytes           | 6,00E-25 | CASP1, CCL2, CCL5, CCL11, CD2, CD6, CD27, CD48, CD69, CD96, CD1D, CD300A, CYBB, FCGR3B, FGR, GZMA, GZMB, HCK, HLA-DRB1, IMPDH1, ITGAL, ITGB2, ITK, KLRK1, LCK, PRF1, PTPN6, PTPRC, SLAMF6, STAT1, STAT4, TYROBP, VAV1, WAS                                                                                                                                                                                                                                     | 34 |
| Cell Death | cytotoxicity | cytotoxicity of eukaryotic cells     | 2,86E-24 | CASP1, CCL2, CCL5, CCL11, CD2, CD6, CD27, CD28, CD48, CD69, CD96, CD1D, CD300A, CYBB, FCGR3B, FGR, GZMA, GZMB, HCK, HLA-DRB1, IGHG1, IMPDH1, ITGAL, ITGB2, ITK, KLRK1, LCK, PRF1, PTPN6, PTPRC, SLAMF6, STAT1, STAT4, TAC1, TYROBP, VAV1, WAS                                                                                                                                                                                                                  | 37 |
| Cell Death | cytotoxicity | cytotoxicity of lymphocytes          | 2,01E-21 | CCL2, CCL5, CCL11, CD2, CD6, CD27, CD48, CD69, CD96, CD1D, CD300A, FCGR3B, GZMA, GZMB, HLA-DRB1, IMPDH1, ITGAL, ITGB2, ITK, KLRK1, LCK, PRF1, PTPN6, PTPRC, SLAMF6, STAT1, STAT4, TYROBP, VAV1, WAS                                                                                                                                                                                                                                                            | 30 |
| Cell Death | cytotoxicity | cytotoxicity of natural killer cells | 5,66E-17 | CCL2, CD2, CD6, CD27, CD48, CD69, CD96, CD300A, FCGR3B, ITGAL, ITGB2, ITK, KLRK1, LCK, PRF1, PTPN6, SLAMF6, STAT1, STAT4, TYROBP, VAV1, WAS                                                                                                                                                                                                                                                                                                                    | 22 |
| Cell Death | cytotoxicity | cytotoxicity of T lymphocytes        | 1,20E-08 | CCL5, CCL11, CD27, CD1D, GZMA, GZMB, HLA-DRB1, IMPDH1, KLRK1, PRF1, PTPRC, STAT4                                                                                                                                                                                                                                                                                                                                                                               | 12 |
| Cell Death | survival     | survival of leukocytes               | 2,86E-20 | BCL2A1, BTK, BTLA, CCL4, CCL11, CD19, CD22, CD28, CD86, CD300A, CD3E, CD8A, CSF1R, CSF2RB, FCER1G, HCK, ICOS, IL1B, IL2RB, IL2RG, ITGB2, JAK3, LAX1, MYB (includes EG:4602), PRKCB, PTPRC, RAC2, STAT1, STAT4, TNFRSF17, TNFRSF1B, TNFSF13B, TYROBP                                                                                                                                                                                                            | 33 |
| Cell Death | survival     | survival of blood cells              | 1,24E-19 | BCL2A1, BTK, BTLA, CCL3, CCL4, CCL11, CD19, CD22, CD28, CD86, CD300A, CD3E, CD8A, CSF1R, CSF2RB, FCER1G, HCK, ICOS, IL1B, IL2RB, IL2RG, ITGB2, JAK3, LAX1, MYB (includes EG:4602), PRKCB, PTPRC, RAC2, STAT1, STAT4, TNFRSF17, TNFRSF1B, TNFSF13B, TYROBP                                                                                                                                                                                                      | 34 |
| Cell Death | survival     | survival of lymphocytes              | 2,80E-13 | BTK, BTLA, CD19, CD22, CD28, CD86, CD3E, CD8A, HCK, ICOS, IL2RB, IL2RG, JAK3, LAX1, MYB (includes EG:4602), PRKCB, PTPRC, STAT1, STAT4, TNFRSF17, TNFRSF1B, TNFSF13B                                                                                                                                                                                                                                                                                           | 22 |
| Cell Death | survival     | survival of normal cells             | 1,24E-11 | BCL2A1, BTK, BTLA, CCL3, CCL4, CCL5, CCL11, CCL21, CD4, CD19, CD22, CD28, CD86, CD300A, CD3E, CD8A, CSF1R, CSF2RB, CXCL9, FCER1G, HCK, ICOS, IL1B, IL2RB, IL2RG, ITGB2, JAK3, LAX1, MYB (includes EG:4602), PRKCB, PTPRC, RAC2, STAT1, STAT4, TIMP1, TNFRSF17, TNFRSF1B, TNFSF13B, TYROBP                                                                                                                                                                      | 39 |
| Cell Death | survival     | survival of T lymphocytes            | 3,14E-10 | BTLA, CD28, CD86, CD3E, CD8A, ICOS, IL2RB, IL2RG, JAK3, LAX1, MYB (includes EG:4602), PTPRC, STAT1, STAT4, TNFRSF1B                                                                                                                                                                                                                                                                                                                                            | 15 |
| Cell Death | survival     | survival of cells                    | 3,36E-09 | BCL2A1, BTK, BTLA, CCL2, CCL3, CCL4, CCL5, CCL11, CCL21, CD4, CD19, CD22, CD28, CD48, CD86, CD300A, CD3E, CD8A, CSF1R, CSF2RB, CXCL9, CXCL10, CXCL11, CXCR3, DGKA, FCER1G, FGR, GZMB, HCK, ICOS, IL1B, IL2RB, IL2RG, ITGB2, JAK3, LAX1, LCK, LYZ, MYB (includes EG:4602), PLAC8, PRKCB, PTPN6, PTPN7, PTPN22, PTPRC, RAC2, STAT1, STAT4, TCL1A, TIMP1, TNFRSF17, TNFRSF1B, TNFSF13B, TYROBP                                                                    | 54 |
| Cell Death | survival     | survival of eukaryotic cells         | 1,88E-08 | BCL2A1, BTK, BTLA, CCL2, CCL3, CCL4, CCL5, CCL11, CCL21, CD4, CD19, CD22, CD28, CD86, CD300A, CD3E, CD8A, CSF1R, CSF2RB, CXCL9, CXCR3, DGKA, FCER1G, FGR, HCK, ICOS, IL1B, IL2RB, IL2RG, ITGB2, JAK3, LAX1, LCK, MYB (includes EG:4602), PLAC8, PRKCB, PTPN6, PTPN7, PTPN22, PTPRC, RAC2, STAT1, STAT4, TCL1A, TIMP1, TNFRSF17, TNFRSF1B, TNFSF13B, TYROBP                                                                                                     | 49 |
| Cell Death | lysis        | lysis of cells                       | 9,91E-10 | CASP1, CD4, CD48, CD1D, CD8A, CR2, GNLY, GZMA, GZMB, IGHG1, IL27RA, ITGB2, KLRK1, LCK, PRF1, PTPRC, TNFRSF1B, VAV1                                                                                                                                                                                                                                                                                                                                             | 18 |
| Cell Death | lysis        | lysis of eukaryotic                  | 7,60E-08 | CD4, CD48, CD1D, CR2, GNLY, GZMB, IL27RA, ITGB2, KLRK1, LCK, PRF1, PTPRC, TNFRSF1B, VAV1                                                                                                                                                                                                                                                                                                                                                                       | 14 |

|                    |                               |                                                   |          |                                                                                                                                                                                                                                                                                                                                                                                                                                                                           |    |  |
|--------------------|-------------------------------|---------------------------------------------------|----------|---------------------------------------------------------------------------------------------------------------------------------------------------------------------------------------------------------------------------------------------------------------------------------------------------------------------------------------------------------------------------------------------------------------------------------------------------------------------------|----|--|
|                    |                               | cells                                             |          |                                                                                                                                                                                                                                                                                                                                                                                                                                                                           |    |  |
| Cell Death         | activation-induced cell death | activation-induced cell death                     | 6,47E-09 | CCR5, CD28, CD3E, CIITA, IRF4, ITK, LTB, MAP4K1, PRF1, RAC2, STAT1, TNFRSF1B                                                                                                                                                                                                                                                                                                                                                                                              | 12 |  |
| Cell Death         | activation-induced cell death | activation-induced cell death of T lymphocytes    | 1,83E-08 | CCR5, CD28, CD3E, CIITA, ITK, MAP4K1, PRF1, RAC2, STAT1                                                                                                                                                                                                                                                                                                                                                                                                                   | 9  |  |
| Cell Death         | activation-induced cell death | activation-induced cell death of eukaryotic cells | 1,09E-07 | CCR5, CD28, CD3E, CIITA, ITK, MAP4K1, PRF1, RAC2, STAT1, TNFRSF1B                                                                                                                                                                                                                                                                                                                                                                                                         | 10 |  |
| Cell Death         | killing                       | killing of natural killer cells                   | 1,34E-08 | CD48, CD1D, LY9, PRF1, SH2D1A, SLAMF6, SLAMF7, STAT1                                                                                                                                                                                                                                                                                                                                                                                                                      | 8  |  |
| Cell Death         | killing                       | killing of lymphocytes                            | 2,66E-08 | CD48, CD1D, CIITA, KLRK1, LY9, PRF1, SH2D1A, SLAMF6, SLAMF7, STAT1                                                                                                                                                                                                                                                                                                                                                                                                        | 10 |  |
| Cell Death         | killing                       | killing of hematopoietic cells                    | 6,77E-08 | CD48, KLRK1, LY9, SH2D1A, SLAMF6, SLAMF7                                                                                                                                                                                                                                                                                                                                                                                                                                  | 6  |  |
| Cell Death         | cytolysis                     | cytolysis                                         | 2,93E-08 | CD48, CD247, CR2, GNLY, GZMA, GZMB, IGHG1, IGKC, ITGB2, KLRK1, LCK, PRF1, PTPRC, TNFRSF1B, VAV1                                                                                                                                                                                                                                                                                                                                                                           | 15 |  |
| Cell Death         | cytolysis                     | cytolysis of cells                                | 3,50E-08 | CD48, CR2, GNLY, GZMA, GZMB, IGHG1, ITGB2, KLRK1, LCK, PRF1, PTPRC, TNFRSF1B, VAV1                                                                                                                                                                                                                                                                                                                                                                                        | 13 |  |
| Tissue Development | adhesion                      | adhesion of blood cells                           | 7,03E-27 | BTK, C3, C1QA, CCL2, CCL3, CCL4, CCL5, CCL11, CCL19, CCL20, CCL21, CD2, CD19, CD28, CD48, CORO1A, CR2, CSF3R, CXCL2, CXCL9, CXCL10, CXCL11, CXCR3, FCER1G, FGR, FYB, GZMB, HCK, ICAM2, ICOS, IGHM, IL1B, ITGAL, ITGAX, ITGB2, ITK, LCP1, PTPRC, RAC2, RASSF5, RGS1, S100A8, SAA1, SELL, SELPLG, TAC1, VAV1                                                                                                                                                                | 47 |  |
| Tissue Development | adhesion                      | adhesion of leukocytes                            | 3,38E-24 | BTK, C3, C1QA, CCL2, CCL3, CCL4, CCL5, CCL11, CCL19, CCL20, CCL21, CD2, CD19, CD28, CD48, CORO1A, CSF3R, CXCL2, CXCL9, CXCL11, CXCR3, FGR, FYB, HCK, ICAM2, ICOS, IL1B, ITGAL, ITGAX, ITGB2, ITK, LCP1, PTPRC, RAC2, RASSF5, RGS1, S100A8, SELL, SELPLG, TAC1, VAV1                                                                                                                                                                                                       | 41 |  |
| Tissue Development | adhesion                      | adhesion of normal cells                          | 3,88E-23 | AMICA1, BTK, C3, C1QA, CCL2, CCL3, CCL4, CCL5, CCL11, CCL19, CCL20, CCL21, CD2, CD19, CD28, CD48, CD8A, CORO1A, CR2, CSF3R, CXCL2, CXCL9, CXCL10, CXCL11, CXCR3, FCER1G, FGR, FYB, GZMB, HCK, ICAM2, ICOS, IGHM, IL1B, ITGAL, ITGAX, ITGB2, ITK, LCP1, PTPRC, RAC2, RASSF5, RGS1, S100A8, SAA1, SELL, SELPLG, TAC1, VAV1                                                                                                                                                  | 49 |  |
| Tissue Development | adhesion                      | adhesion of mononuclear leukocytes                | 1,46E-22 | BTK, CCL2, CCL3, CCL4, CCL5, CCL11, CCL19, CCL20, CCL21, CD2, CD19, CD28, CD48, CXCL9, CXCL11, CXCR3, FYB, ICAM2, ICOS, IL1B, ITGAL, ITGAX, ITGB2, ITK, LCP1, RASSF5, RGS1, SELL, SELPLG, TAC1, VAV1                                                                                                                                                                                                                                                                      | 31 |  |
| Tissue Development | adhesion                      | adhesion of cells                                 | 6,00E-21 | ADAM8, AMICA1, BTK, C3, C1ORF38, C1QA, CCL2, CCL3, CCL4, CCL5, CCL11, CCL19, CCL20, CCL21, CCR2, CCR5, CD2, CD4, CD19, CD28, CD48, CD84, CD96, CD8A, CLEC7A, CORO1A, CR2, CSF3R, CXCL2, CXCL9, CXCL10, CXCL11, CXCR3, CYTIP, EMB, EMR1, FCER1G, FGB, FGR, FYB, GZMB, HCK, ICAM2, ICOS, IGHA1, IGHM, IL1B, ITGAL, ITGAX, ITGB2, ITK, LCK, LCP1, LTF, MYO1F, PARVG, PCDH10, PTPRC, RAC2, RASSF5, RGS1, S100A8, SAA1, SELL, SELPLG, ST8SIA4, STAT1, TAC1, TIMP1, VAV1, ZAP70 | 71 |  |
| Tissue Development | adhesion                      | adhesion of lymphocytes                           | 5,86E-20 | BTK, CCL2, CCL3, CCL4, CCL11, CCL19, CCL20, CCL21, CD2, CD19, CD28, CD48, CXCL9, CXCL11, CXCR3, FYB, ICAM2, ICOS, ITGAL, ITGB2, ITK, RASSF5, RGS1, SELL, SELPLG, TAC1                                                                                                                                                                                                                                                                                                     | 26 |  |
| Tissue Development | adhesion                      | adhesion of eukaryotic cells                      | 6,87E-20 | AMICA1, BTK, C3, C1QA, CCL2, CCL3, CCL4, CCL5, CCL11, CCL19, CCL20, CCL21, CD2, CD4, CD19, CD28, CD48, CD8A, CORO1A, CR2, CSF3R, CXCL2, CXCL9, CXCL10, CXCL11, CXCR3, CYTIP, FCER1G, FGR, FYB, GZMB, HCK, ICAM2, ICOS, IGHM, IL1B, ITGAL, ITGAX, ITGB2, ITK, LCP1, LTF, PARVG, PTPRC, RAC2, RASSF5, RGS1, S100A8, SAA1, SELL, SELPLG, TAC1, TIMP1, VAV1, ZAP70                                                                                                            | 55 |  |
| Tissue Development | adhesion                      | adhesion of T lymphocytes                         | 9,88E-17 | CCL3, CCL4, CCL11, CCL19, CCL20, CCL21, CD2, CD48, CXCL9, CXCL11, CXCR3, FYB, ICAM2, ICOS, ITGAL, ITGB2, ITK, RASSF5, SELL, SELPLG, TAC1                                                                                                                                                                                                                                                                                                                                  | 21 |  |
| Tissue Development | adhesion                      | adhesion of granulocytes                          | 1,87E-11 | C3, CCL11, CORO1A, CSF3R, CXCL2, FGR, HCK, IL1B, ITGAL, ITGAX, ITGB2, LCP1, S100A8, SELL, SELPLG, VAV1                                                                                                                                                                                                                                                                                                                                                                    | 16 |  |

|                     |                          |                                        |          |                                                                                                                                                                                                                                                                                                                                                                                                                                                          |    |
|---------------------|--------------------------|----------------------------------------|----------|----------------------------------------------------------------------------------------------------------------------------------------------------------------------------------------------------------------------------------------------------------------------------------------------------------------------------------------------------------------------------------------------------------------------------------------------------------|----|
| Tissue Development  | adhesion                 | adhesion of neutrophils                | 2,10E-09 | CORO1A, CSF3R, CXCL2, IL1B, ITGAL, ITGAX, ITGB2, LCP1, S100A8, SELL, SELPLG, VAV1                                                                                                                                                                                                                                                                                                                                                                        | 12 |
| Tissue Development  | adhesion                 | adhesion of endothelial cells          | 4,78E-08 | AMICA1, C1QA, CCL2, CCL3, CCL4, CCL5, ICAM2, IL1B, ITGAL, ITGAX, ITGB2, SELL, SELPLG                                                                                                                                                                                                                                                                                                                                                                     | 13 |
| Tissue Development  | adhesion                 | adhesion of lymphoma cell lines        | 1,07E-07 | CCL2, CCL21, CD4, CR2, CXCL2, ITGAL, ITGAX, ITGB2, PARVG                                                                                                                                                                                                                                                                                                                                                                                                 | 9  |
| Tissue Development  | accumulation             | accumulation of leukocytes             | 2,07E-22 | ALOX5, CCL2, CCL5, CCL11, CCL21, CCR2, CCR5, CCR7, CD28, CD86, CD1D, CXCL2, CXCL9, CXCL10, CXCR3, CYBB, DEF6, GRN, ICOS, IL10RA, IL1B, IL1RN, IL2RG, ITGAL, ITGAX, ITGB2, PTGDS, RUNX3, S100A8, SELL, SELPLG, SH2D2A, SLPI, TIMP1, TNFRSF25                                                                                                                                                                                                              | 35 |
| Tissue Development  | accumulation             | accumulation of cells                  | 1,43E-18 | ALOX5, CCL2, CCL5, CCL11, CCL21, CCR2, CCR5, CCR7, CD28, CD86, CD1D, CXCL2, CXCL9, CXCL10, CXCR3, CYBB, DEF6, GRN, ICOS, IL10RA, IL1B, IL1RN, IL2RG, ITGAL, ITGAX, ITGB2, PTGDS, PTTG1, RAC2, RUNX3, S100A8, SELL, SELPLG, SH2D2A, SLPI, TIMP1, TNFRSF25                                                                                                                                                                                                 | 37 |
| Tissue Development  | accumulation             | accumulation of mononuclear leukocytes | 1,31E-16 | CCL5, CCL21, CCR5, CCR7, CD28, CD86, CD1D, CXCL2, CXCL10, CXCR3, DEF6, ICOS, IL10RA, IL2RG, ITGAL, ITGB2, PTGDS, RUNX3, SELL, SH2D2A, TNFRSF25                                                                                                                                                                                                                                                                                                           | 21 |
| Tissue Development  | accumulation             | accumulation of lymphocytes            | 3,50E-15 | CCL5, CCL21, CCR5, CCR7, CD28, CD86, CD1D, CXCL10, CXCR3, DEF6, ICOS, IL10RA, IL2RG, ITGAL, ITGB2, RUNX3, SELL, SH2D2A, TNFRSF25                                                                                                                                                                                                                                                                                                                         | 19 |
| Tissue Development  | accumulation             | accumulation of T lymphocytes          | 5,82E-14 | CCL5, CCL21, CCR5, CCR7, CD28, CD86, CXCL10, CXCR3, DEF6, ICOS, IL10RA, IL2RG, ITGAL, RUNX3, SH2D2A, TNFRSF25                                                                                                                                                                                                                                                                                                                                            | 16 |
| Tissue Development  | accumulation             | accumulation of phagocytes             | 6,34E-11 | CCL2, CCL5, CCL11, CCR2, CD28, CXCL2, CXCL10, GRN, IL1B, IL1RN, ITGAX, ITGB2, S100A8, SELPLG, SLPI, TIMP1                                                                                                                                                                                                                                                                                                                                                | 16 |
| Tissue Development  | accumulation             | accumulation of granulocytes           | 2,59E-10 | ALOX5, CCL2, CCL5, CCL11, CXCL2, CXCL9, CXCL10, GRN, IL1B, IL1RN, ITGB2, PTGDS, S100A8, SELPLG, SLPI                                                                                                                                                                                                                                                                                                                                                     | 15 |
| Tissue Development  | generation               | generation of lymphocytes              | 3,58E-14 | C3, CD4, CD28, CD86, CR2, HLA-DQB1, ICOS, IL10RA, IL12RB1, IL1RN, IL27RA, IL2RG, IL7R, IRF4, ITK, JAK3, PSMB9, STAT4, TNFSF13B                                                                                                                                                                                                                                                                                                                           | 19 |
| Tissue Development  | generation               | generation of leukocytes               | 1,00E-13 | C3, CD4, CD28, CD86, CR2, HLA-DQB1, ICOS, IL10RA, IL12RB1, IL1RN, IL27RA, IL2RG, IL7R, IRF4, ITK, JAK3, LTB, PSMB9, STAT4, TNFSF13B                                                                                                                                                                                                                                                                                                                      | 20 |
| Tissue Development  | generation               | generation of T lymphocytes            | 2,01E-10 | CD4, CD28, CD86, HLA-DQB1, ICOS, IL10RA, IL12RB1, IL27RA, IL2RG, ITK, JAK3, PSMB9, STAT4, TNFSF13B                                                                                                                                                                                                                                                                                                                                                       | 14 |
| Tissue Development  | aggregation              | aggregation of cells                   | 1,98E-10 | BTK, CCL5, CCL11, CD2, CD4, CD6, CP, CXCL9, CXCL10, CXCR3, FCER1G, FPR1, HCLS1, ICAM2, IGHM, ITGAL, ITGB2, LCK, LCP2, LTF, MMP7, PCDH10, PTPRC, SELL, SELPLG, TIMP1, VAV1                                                                                                                                                                                                                                                                                | 27 |
| Tissue Development  | aggregation              | aggregation of blood cells             | 7,98E-08 | BTK, CCL5, CCL11, CD4, CXCL9, CXCL10, CXCR3, FCER1G, FPR1, HCLS1, IGHM, ITGAL, ITGB2, LCK, LCP2, SELL, SELPLG, VAV1                                                                                                                                                                                                                                                                                                                                      | 18 |
| Respiratory Disease | respiratory disorder     | respiratory disorder                   | 2,21E-22 | ADA, ALOX5, C3, C3AR1, CASP1, CCL2, CCL3, CCL5, CCL11, CCL19, CCL21, CCR2, CCR5, CCR7, CD4, CD14, CD86, CD247, CD1D, CD3E, CD8A, CIITA, CSF2RB, CTSS, CXCL10, CXCL11, CYBB, CYSLTR1, FGB, FPR1, GZMB, HCK, HLA-DRB1, ICOS, IGHG1, IGF1, IL16, IL10RA, IL1B, IL1RN, IL27RA, IL2RB, IMPDH1, ITGB2, ITK, LCK, LCN2, LTF, LYZ, MMP7, MND, MS4A1, NCF1, NOD2, PLA2G7, PTPRC, PTTG1, REG1A, RUNX3, SLC2A3, SLPI, STAT1, STAT4, TCIRG1, TIMP1, TNFRSF25, TXNDC3 | 67 |
| Respiratory Disease | respiratory disorder     | respiratory disorder of rodents        | 1,95E-15 | ALOX5, CCL2, CCL5, CCL11, CCL19, CCL21, CCR2, CCR5, CD4, CD14, CD86, CD1D, CIITA, CTSS, CYBB, GZMB, ICOS, IGHG1, IL1B, IL1RN, IL27RA, IL2RB, ITK, NCF1, RUNX3, STAT1, STAT4, TNFRSF25                                                                                                                                                                                                                                                                    | 28 |
| Respiratory Disease | respiratory disorder     | respiratory disorder of mice           | 7,82E-15 | ALOX5, CCL2, CCL5, CCL11, CCL19, CCL21, CCR2, CCR5, CD4, CD14, CD86, CD1D, CIITA, CTSS, CYBB, GZMB, ICOS, IGHG1, IL1B, IL27RA, IL2RB, ITK, NCF1, RUNX3, STAT1, STAT4, TNFRSF25                                                                                                                                                                                                                                                                           | 27 |
| Respiratory Disease | severe acute respiratory | severe acute respiratory               | 4,70E-11 | C3AR1, CCR7, CD247, CD3E, CSF2RB, FPR1, IL10RA, ITK, LCK, LCN2, LTF, MND, NCF1, PTTG1, SLC2A3, SLPI, STAT4, TCIRG1, TIMP1                                                                                                                                                                                                                                                                                                                                | 19 |

|                     |                            |                                                 |          |                                                                                                                                                                                                                                                                                                                                                                                                                                                                                                                                                                                                                                                                                                                                                                 |     |
|---------------------|----------------------------|-------------------------------------------------|----------|-----------------------------------------------------------------------------------------------------------------------------------------------------------------------------------------------------------------------------------------------------------------------------------------------------------------------------------------------------------------------------------------------------------------------------------------------------------------------------------------------------------------------------------------------------------------------------------------------------------------------------------------------------------------------------------------------------------------------------------------------------------------|-----|
|                     | y syndrome                 |                                                 |          |                                                                                                                                                                                                                                                                                                                                                                                                                                                                                                                                                                                                                                                                                                                                                                 |     |
| Respiratory Disease | airway hyperresponsiveness | airway hyperresponsiveness of organism          | 1,09E-08 | ALOX5, C3, C3AR1, CD86, CD1D, ICOS, IGHG1, IL1RN, IL27RA, IL2RB, ITK, RUNX3, STAT4                                                                                                                                                                                                                                                                                                                                                                                                                                                                                                                                                                                                                                                                              | 13  |
| Respiratory Disease | pneumonitis                | pneumonitis                                     | 3,78E-08 | CCL2, CCL3, CCR2, CCR5, CD4, CD14, CD86, CIITA, CTSS, HLA-DRB1, IL16, IL1B, MS4A1, NOD2, STAT1, TNFRSF25                                                                                                                                                                                                                                                                                                                                                                                                                                                                                                                                                                                                                                                        | 16  |
| Infectious Disease  | infectious disorder        | infectious disorder                             | 3,92E-22 | ADA, ALOX5, APOBEC3G, APOC1, ARID5A, BIRC3, C2, C3, C1QA, C3AR1, CARD16, CASP1, CCL2, CCL3, CCL4, CCL5, CCL11, CCL20, CCR2, CCR5, CCR7, CCRL2, CD4, CD14, CD19, CD22, CD28, CD69, CD86, CD163, CD247, CD1D, CD3E, CD79A, CR2, CSF2RB, CSF3R, CTSS, CXCL1, CXCL9, CXCL10, CXCL11, CXCR3, CYBB, CYSLTR1, DARC, FCER1G, FPR1, GABBR1, HCK, HCP5, HLA-DOA, HLA-DQB1, ICOS, IGHM, IGK@, IGL@, IL16, IL10RA, IL12RB1, IL1B, IL1RN, IL27RA, IL2RB, IL2RG, IL7R, IMPDH1, IRF1, ITGAL, ITGB2, ITK, LAPTM5, LCK, LCN2, LCP2, LTB, LTF, LY86, LY96, LYZ, MNDA, MS4A1, MS4A4A, MYO1F, NCF1, PPM1N, PRF1, PTPRC, PTTG1, RARRES3, SELPLG, SLAMF1, SLC2A3, SLPI, STAT1, STAT4, TCIRG1, TIMP1, TLR7, TLR8 (includes EG:51311), TNFRSF17, TNFRSF1B, UBASH3A, UNC93B1, VAV1, XCL1 | 106 |
| Infectious Disease  | infectious disorder        | infectious disorder of mammalia                 | 6,95E-18 | BIRC3, C3, C1QA, CASP1, CCL2, CCR2, CCR5, CD4, CD14, CD19, CD22, CD1D, CXCR3, CYBB, HCK, HLA-DQB1, ICOS, IGHM, IL1B, IL1RN, IL27RA, ITGB2, ITK, LCN2, PRF1, STAT1, STAT4, TLR7, UNC93B1, VAV1                                                                                                                                                                                                                                                                                                                                                                                                                                                                                                                                                                   | 30  |
| Infectious Disease  | infectious disorder        | infectious disorder of rodents                  | 1,72E-17 | BIRC3, C3, C1QA, CASP1, CCL2, CCR2, CCR5, CD4, CD14, CD19, CD22, CD1D, CXCR3, CYBB, HCK, HLA-DQB1, IGHM, IL1B, IL1RN, IL27RA, ITGB2, ITK, LCN2, PRF1, STAT1, STAT4, TLR7, UNC93B1, VAV1                                                                                                                                                                                                                                                                                                                                                                                                                                                                                                                                                                         | 29  |
| Infectious Disease  | infectious disorder        | infectious disorder of mice                     | 9,96E-17 | BIRC3, C3, C1QA, CASP1, CCL2, CCR2, CCR5, CD4, CD14, CD19, CD22, CD1D, CYBB, HCK, HLA-DQB1, IGHM, IL1B, IL1RN, IL27RA, ITGB2, ITK, LCN2, PRF1, STAT1, STAT4, TLR7, UNC93B1, VAV1                                                                                                                                                                                                                                                                                                                                                                                                                                                                                                                                                                                | 28  |
| Infectious Disease  | leprosy                    | leprosy                                         | 2,94E-16 | CCL3, CCL4, CCRL2, CD4, CD14, CD19, CD22, CD28, CD79A, CXCR3, FCER1G, IGHM, IGK@, IGL@, IL12RB1, IL2RB, IL2RG, LY86, SLAMF1, SLPI, TNFRSF17                                                                                                                                                                                                                                                                                                                                                                                                                                                                                                                                                                                                                     | 21  |
| Infectious Disease  | lepomatous leprosy         | lepomatous leprosy                              | 1,05E-13 | CCL3, CCL4, CCRL2, CD4, CD14, CD19, CD22, FCER1G, IGHM, IGK@, IGL@, IL2RB, IL2RG, LY86, TNFRSF17                                                                                                                                                                                                                                                                                                                                                                                                                                                                                                                                                                                                                                                                | 15  |
| Infectious Disease  | infection                  | infection by Hepatitis C virus                  | 3,58E-12 | CCL2, CCL3, CCL4, CCL5, CCL20, CXCL9, CXCL10, CXCL11, IMPDH1                                                                                                                                                                                                                                                                                                                                                                                                                                                                                                                                                                                                                                                                                                    | 9   |
| Infectious Disease  | infection                  | infection of blood cells                        | 9,66E-10 | CASP1, CCL3, CCL5, CCR2, CCR5, CD4, DARC, FPR1, IRF1, LTF, RARRES3                                                                                                                                                                                                                                                                                                                                                                                                                                                                                                                                                                                                                                                                                              | 11  |
| Infectious Disease  | infection                  | infection of normal cells                       | 9,99E-10 | CASP1, CCL3, CCL5, CCR2, CCR5, CD4, DARC, FPR1, IRF1, LTF, RARRES3, TNFRSF1B                                                                                                                                                                                                                                                                                                                                                                                                                                                                                                                                                                                                                                                                                    | 12  |
| Infectious Disease  | infection                  | infection by Reoviridae                         | 1,11E-09 | CCL2, CCL4, CCL5, CTSS, CXCL1, CXCL10                                                                                                                                                                                                                                                                                                                                                                                                                                                                                                                                                                                                                                                                                                                           | 6   |
| Infectious Disease  | infection                  | infection by measles virus                      | 6,99E-09 | CCL2, CCL3, CCL4, CCL5, CXCL10                                                                                                                                                                                                                                                                                                                                                                                                                                                                                                                                                                                                                                                                                                                                  | 5   |
| Infectious Disease  | infection                  | infection of leukocytes                         | 1,20E-08 | CASP1, CCL3, CCL5, CCR2, CCR5, CD4, FPR1, IRF1, LTF, RARRES3                                                                                                                                                                                                                                                                                                                                                                                                                                                                                                                                                                                                                                                                                                    | 10  |
| Infectious Disease  | infection                  | infection by Human cytomegalo virus             | 1,28E-08 | CCL2, CCL3, CCL4, CCL5, CXCL9, CXCL10                                                                                                                                                                                                                                                                                                                                                                                                                                                                                                                                                                                                                                                                                                                           | 6   |
| Infectious Disease  | infection                  | infection of mammalia                           | 3,78E-08 | CASP1, CCR2, CCR5, CD1D, ICOS, IGHM, IL1B, IL27RA, ITGB2, ITK, LCN2, PRF1, STAT1, TLR7, UNC93B1                                                                                                                                                                                                                                                                                                                                                                                                                                                                                                                                                                                                                                                                 | 15  |
| Infectious Disease  | infection                  | infection by rotavirus                          | 4,11E-08 | CCL2, CCL4, CCL5, CXCL1, CXCL10                                                                                                                                                                                                                                                                                                                                                                                                                                                                                                                                                                                                                                                                                                                                 | 5   |
| Infectious Disease  | infection                  | infection by lymphocytic choriomeningitis virus | 5,94E-08 | CCL2, CCL3, CCL4, CCL5, CXCL10, ITGB2, XCL1                                                                                                                                                                                                                                                                                                                                                                                                                                                                                                                                                                                                                                                                                                                     | 7   |
| Infectious Disease  | infection                  | infection of mice                               | 9,84E-08 | CASP1, CCR2, CCR5, CD1D, IGHM, IL1B, IL27RA, ITGB2, ITK, LCN2, PRF1, STAT1, TLR7, UNC93B1                                                                                                                                                                                                                                                                                                                                                                                                                                                                                                                                                                                                                                                                       | 14  |
| Infectious Disease  | severe acute respiratory   | severe acute respiratory syndrome               | 4,70E-11 | C3AR1, CCR7, CD247, CD3E, CSF2RB, FPR1, IL10RA, ITK, LCK, LCN2, LTF, MNDA, NCF1, PTTG1, SLC2A3, SLPI, STAT4, TCIRG1, TIMP1                                                                                                                                                                                                                                                                                                                                                                                                                                                                                                                                                                                                                                      | 19  |

|                         |                 |                                        |          |                                                                                                                                                                                                                                           |    |  |
|-------------------------|-----------------|----------------------------------------|----------|-------------------------------------------------------------------------------------------------------------------------------------------------------------------------------------------------------------------------------------------|----|--|
|                         | syndrome        |                                        |          |                                                                                                                                                                                                                                           |    |  |
| Humoral Immune Response | proliferation   | proliferation of B lymphocytes         | 1,89E-21 | ADA, BTK, BTLA, CD4, CD19, CD22, CD86, CD3E, CD79A, CD8A, CR2, HCK, IGHM, IGKC, IL1RN, IL2RG, IL7R, IRF4, LY86, LY96, MS4A1, PRKCB, PTPN6, PTPRC, SASH3, SLAMF1, SLAMF7, SLPI, SPIB, STAT1, TCIRG1, TCL1A, TLR7, TNFRSF17, TNFSF13B, VAV1 | 36 |  |
| Humoral Immune Response | quantity        | quantity of B lymphocytes              | 4,98E-19 | BCL2A1, BTK, C3, CCR7, CD19, CD22, CD27, CD28, CD69, CD79A, CR2, CXCL13, FCER1G, HLA-DQA1, ICOS, IGHM, IGKC, IL2RG, IL7R, ITGB2, JAK3, MS4A1, POU2AF1, PTPN6, RAC2, SLA, TNFRSF1B, TNFSF13B, VAV1, WAS, ZC3H12A                           | 31 |  |
| Humoral Immune Response | quantity        | quantity of plasma cells               | 8,00E-11 | CD22, ICOS, IL7R, ITGB2, PTPN6, RAC2, TNFRSF1B, TNFSF13B, ZC3H12A                                                                                                                                                                         | 9  |  |
| Humoral Immune Response | formation       | formation of germinal center           | 5,23E-11 | ADA, C3, CD28, CXCL13, ICOS, LAX1, LTB, POU2AF1, SH2D1A, TAC1, TNFSF13B, VAV1                                                                                                                                                             | 12 |  |
| Humoral Immune Response | cell movement   | cell movement of B lymphocytes         | 1,39E-10 | CCL18, CCL19, CCL20, CCL21, CCR2, CXCL9, CXCL13, POU2AF1, RAC2, RGS1, SELPLG, ZC3H12A                                                                                                                                                     | 12 |  |
| Humoral Immune Response | activation      | activation of B lymphocytes            | 3,87E-10 | ADA, BTK, C1QA, CD19, CD22, CD86, CD8A, CR2, IGHG1, IGHM, LAX1, POU2AF1, PTPRC, TNFRSF17, TNFSF13B, VAV1                                                                                                                                  | 16 |  |
| Humoral Immune Response | chemotaxis      | chemotaxis of B lymphocytes            | 2,91E-09 | CCL18, CCL19, CCL20, CCL21, CCR2, CXCL9, CXCL13, RAC2, RGS1                                                                                                                                                                               | 9  |  |
| Humoral Immune Response | migration       | migration of B lymphocytes             | 3,61E-09 | CCL19, CCL20, CCL21, CD22, CXCL13, DOCK2, ICOS, TIMP1, TNFRSF1B, TNFSF13B                                                                                                                                                                 | 10 |  |
| Humoral Immune Response | differentiation | differentiation of B lymphocytes       | 2,03E-08 | CD14, CD27, CD79A, CR2, ICOS, IGHM, IKZF1, IL2RB, IL2RG, IL7R, IRF4, POU2AF1, PTPN6, PTPRC, SPIB, TLR7, TNFSF13B                                                                                                                          | 17 |  |
| Humoral Immune Response | development     | development of B lymphocytes           | 1,15E-07 | ADA, BTK, CD19, CD69, CR2, IGHM, IL2RG, IL7R, JAK3, MYB (includes EG:4602), POU2AF1, TNFSF13B, VAV1                                                                                                                                       | 13 |  |
| Antigen Presentation    | migration       | migration of dendritic cells           | 3,57E-21 | C3, CCL3, CCL4, CCL5, CCL19, CCL20, CCL21, CCR2, CCR5, CCR7, CD86, CXCL9, CXCL10, CXCL11, CXCL13, CXCR3, ICAM2, IL16, IL10RA, IL1B, RAC2, RUNX3, TAC1, TIMP1, WAS                                                                         | 25 |  |
| Antigen Presentation    | chemotaxis      | chemotaxis of phagocytes               | 3,97E-18 | CCL2, CCL3, CCL4, CCL5, CD28, CORO1A, CSF3R, CXCL1, CXCL2, CXCL6, CXCL9, CXCL10, CXCR3, FCER1G, FGR, FPR1, HCK, IL12RB1, IL1B, ITGB2, LSP1, PTPN6, RAC2, S100A8, SAA1, TAC1, XCL1                                                         | 27 |  |
| Antigen Presentation    | chemotaxis      | chemotaxis of neutrophils              | 1,64E-16 | CCL2, CCL3, CCL4, CCL5, CD28, CORO1A, CSF3R, CXCL1, CXCL2, CXCL6, CXCL10, FCER1G, FGR, FPR1, HCK, IL1B, ITGB2, LSP1, PTPN6, RAC2, S100A8, TAC1, XCL1                                                                                      | 23 |  |
| Antigen Presentation    | chemotaxis      | chemotaxis of antigen presenting cells | 2,54E-12 | CCL2, CCL3, CCL4, CCL5, CCL11, CCL19, CCL20, CCL21, CCR7, CXCL9, CXCR3, FPR1, GNLY, IL16, IL12RB1, IL1B, SAA1, TAC1                                                                                                                       | 18 |  |
| Antigen Presentation    | chemotaxis      | chemotaxis of dendritic cells          | 2,22E-11 | CCL2, CCL3, CCL4, CCL5, CCL11, CCL19, CCL20, CCL21, CCR7, FPR1, GNLY, IL16, IL1B, TAC1                                                                                                                                                    | 14 |  |
| Antigen Presentation    | chemotaxis      | chemotaxis of B lymphocytes            | 2,91E-09 | CCL18, CCL19, CCL20, CCL21, CCR2, CXCL9, CXCL13, RAC2, RGS1                                                                                                                                                                               | 9  |  |
| Antigen Presentation    | activation      | activation of neutrophils              | 1,03E-14 | C3, CCL2, CCL3, CCL4, CCL5, CD14, CXCL1, CXCL6, FPR1, IL18RAP, IL1B, IL1RN, LCN2, LTF, NCF1C, SELL, TAC1, VAV1                                                                                                                            | 18 |  |
| Antigen Presentation    | activation      | activation of antigen presenting cells | 9,47E-14 | CCL2, CCL3, CCL4, CCL5, CD4, CD86, CD1D, CSF1R, CXCL10, FCER1G, HCK, HLA-DMB, HLA-DOA, HLA-DQA1, HLA-DQB1, IGHM, IL1B, LTB, LTF, PSMB9, SLPI, STAT1, STAT4, TAC1, TLR7, TNFRSF1B                                                          | 26 |  |
| Antigen Presentation    | activation      | activation of phagocytes               | 1,23E-13 | C3, CCL2, CCL3, CCL4, CCL5, CD4, CD14, CSF1R, CXCL1, CXCL6, CXCL10, FCER1G, FPR1, HCK, IL18RAP, IL1B, IL1RN, LCN2, LTF, NCF1C, SELL, STAT1, STAT4, TAC1, VAV1                                                                             | 25 |  |
| Antigen Presentation    | activation      | activation of B                        | 3,87E-10 | ADA, BTK, C1QA, CD19, CD22, CD86, CD8A, CR2, IGHG1, IGHM, LAX1, POU2AF1, PTPRC, TNFRSF17, TNFSF13B, VAV1                                                                                                                                  | 16 |  |

|                                        |                         |                                             |          |                                                                                                                                                                                                                                                                                                                                                                                                                                                                              |    |
|----------------------------------------|-------------------------|---------------------------------------------|----------|------------------------------------------------------------------------------------------------------------------------------------------------------------------------------------------------------------------------------------------------------------------------------------------------------------------------------------------------------------------------------------------------------------------------------------------------------------------------------|----|
| on                                     |                         | lymphocytes                                 |          |                                                                                                                                                                                                                                                                                                                                                                                                                                                                              |    |
| Antigen Presentation                   | cell movement           | cell movement of dendritic cells            | 1,41E-12 | CCL2, CCL3, CCL4, CCL5, CCL11, CCL19, CCL20, CCL21, CCR7, CD86, FPR1, GNLV, ICAM2, IL16, IL1B, TAC1                                                                                                                                                                                                                                                                                                                                                                          | 16 |
| Antigen Presentation                   | cell movement           | cell movement of macrophages                | 1,01E-11 | C3, CCL2, CCL3, CCL4, CCL5, CCR2, CCR5, CSF1R, CXCL9, CXCL10, CXCR3, DARC, IL16, IL12RB1, IL1B, IL1RN, ITGB2, RAC2, SAA1, SELL                                                                                                                                                                                                                                                                                                                                               | 20 |
| Antigen Presentation                   | recruitment             | recruitment of antigen presenting cells     | 3,76E-11 | C3AR1, CCL2, CCL3, CCL4, CCL5, CCL19, CCL20, CCR2, CCR5, CD8A, CXCL10, ITGB2, LSP1, UCP2                                                                                                                                                                                                                                                                                                                                                                                     | 14 |
| Antigen Presentation                   | recruitment             | recruitment of dendritic cells              | 4,81E-10 | CCL2, CCL3, CCL4, CCL5, CCL19, CCL20, CCR2, CXCL10                                                                                                                                                                                                                                                                                                                                                                                                                           | 8  |
| Antigen Presentation                   | recruitment             | recruitment of macrophages                  | 1,71E-08 | C3AR1, CCL2, CCL3, CCL4, CCR2, CCR5, CD8A, CXCL10, ITGB2, LSP1, UCP2                                                                                                                                                                                                                                                                                                                                                                                                         | 11 |
| Antigen Presentation                   | chemoattraction         | chemoattraction of antigen presenting cells | 8,00E-11 | CCL2, CCL3, CCL4, CCL5, CCL19, CCL20, CXCL9, CXCR3, IL12RB1                                                                                                                                                                                                                                                                                                                                                                                                                  | 9  |
| Antigen Presentation                   | chemoattraction         | chemoattraction of macrophages              | 1,29E-10 | CCL2, CCL3, CCL4, CCL5, CXCL9, CXCR3, IL12RB1                                                                                                                                                                                                                                                                                                                                                                                                                                | 7  |
| Antigen Presentation                   | chemoattraction         | chemoattraction of phagocytes               | 4,55E-10 | CCL2, CCL3, CCL4, CCL5, CXCL1, CXCL9, CXCR3, IL12RB1, XCL1                                                                                                                                                                                                                                                                                                                                                                                                                   | 9  |
| Antigen Presentation                   | transmigration          | transmigration of dendritic cells           | 1,11E-08 | CCL3, CCL4, CCL5, CCL19, CCR7, ICAM2, IL1B                                                                                                                                                                                                                                                                                                                                                                                                                                   | 7  |
| Antigen Presentation                   | processing              | processing of antigen                       | 1,34E-08 | ERAP2, FCER1G, HLA-DMB, HLA-DOA, HLA-DQA1, HLA-DQB1, HLA-DRB1, UNC93B1                                                                                                                                                                                                                                                                                                                                                                                                       | 8  |
| Antigen Presentation                   | binding                 | binding of antigen presenting cells         | 1,71E-08 | CD2, CD4, CD6, CD14, CD69, CLEC10A, FPR1, FYB, ITGAL, LCK, PTPRC                                                                                                                                                                                                                                                                                                                                                                                                             | 11 |
| Antigen Presentation                   | quantity                | quantity of dendritic cells                 | 4,93E-08 | CCL19, CCL21, CCR2, CCR7, CXCL13, IKZF1, IRF1, IRF4, ITGB2, LTB, TYROBP                                                                                                                                                                                                                                                                                                                                                                                                      | 11 |
| Dermatological Diseases and Conditions | dermatological disorder | dermatological disorder                     | 3,75E-20 | ADA, ALOX5, CASP1, CCL3, CCL4, CCL5, CCL20, CCRL2, CD2, CD4, CD14, CD19, CD22, CD27, CD28, CD52, CD86, CD1D, CD79A, CSF1R, CSF2RB, CSF3R, CXCL9, CXCL13, CXCR3, CYSLTR1, FCER1G, GABBR1, HLA-DQA1, HLA-DRB1, IGHD, IGHG1, IGHM, IGK@, IGKC, IGL@, IL16, IL12RB1, IL1B, IL1RN, IL27RA, IL2RB, IL2RG, ITGAL, ITGB2, LCK, LCP2, LTB, LY86, MAP4K1, MMP7, MS4A1, NOD2, PRKCB, PTPN6, RGS1, RUNX3, S100A8, SAA1, SELL, SLAMF1, SLPI, STAT1, STAT4, TLR7, TMC8, TNFRSF17, TNFRSF1B | 68 |
| Dermatological Diseases and Conditions | leprosy                 | leprosy                                     | 2,94E-16 | CCL3, CCL4, CCRL2, CD4, CD14, CD19, CD22, CD28, CD79A, CXCR3, FCER1G, IGHM, IGK@, IGL@, IL12RB1, IL2RB, IL2RG, LY86, SLAMF1, SLPI, TNFRSF17                                                                                                                                                                                                                                                                                                                                  | 21 |
| Dermatological Diseases and Conditions | leprous leprosy         | leprous leprosy                             | 1,05E-13 | CCL3, CCL4, CCRL2, CD4, CD14, CD19, CD22, FCER1G, IGHM, IGK@, IGL@, IL2RB, IL2RG, LY86, TNFRSF17                                                                                                                                                                                                                                                                                                                                                                             | 15 |



|                                           |                     |                             |          |                                                                                                                                                                                           |    |
|-------------------------------------------|---------------------|-----------------------------|----------|-------------------------------------------------------------------------------------------------------------------------------------------------------------------------------------------|----|
| Dermatological Diseases and Conditions    | dermatitis          | dermatitis                  | 2,74E-12 | CASP1, CCL5, CD2, CD4, CD52, CD1D, CXCL13, CYSLTR1, FCER1G, HLA-DQA1, HLA-DRB1, IGHM, IGKC, IL16, IL1B, IL1RN, IL2RB, IL2RG, ITGAL, ITGB2, LCP2, LTB, MS4A1, STAT1                        | 24 |
| Dermatological Diseases and Conditions    | psoriatic arthritis | psoriatic arthritis         | 7,74E-12 | CD27, CXCL9, IGHD, IGHG1, IGHM, IGKC, ITGAL, MAP4K1, MS4A1, NOD2, PRKCB, PTPN6, RUNX3, S100A8, SAA1, TNFRSF1B                                                                             | 16 |
| Dermatological Diseases and Conditions    | contact dermatitis  | contact dermatitis          | 4,65E-08 | CD4, CD1D, FCER1G, IGHM, IGKC, IL16, ITGB2, LCP2, LTB                                                                                                                                     | 9  |
| Lymphoid Tissue Structure and Development | homing              | homing of myeloid cells     | 7,97E-20 | C3, CCL2, CCL3, CCL4, CCL5, CCL11, CD28, CORO1A, CSF3R, CXCL1, CXCL2, CXCL6, CXCL9, CXCL10, CXCR3, FCER1G, FGR, FPR1, HCK, IL1B, ITGB2, LSP1, PTPN6, PTPRC, RAC2, S100A8, TAC1, WAS, XCL1 | 29 |
| Lymphoid Tissue Structure and Development | homing              | homing of granulocytes      | 7,75E-19 | C3, CCL2, CCL3, CCL4, CCL5, CCL11, CD28, CORO1A, CSF3R, CXCL1, CXCL2, CXCL6, CXCL9, CXCL10, CXCR3, FCER1G, FGR, FPR1, HCK, IL1B, ITGB2, LSP1, PTPN6, RAC2, S100A8, TAC1, WAS, XCL1        | 28 |
| Lymphoid Tissue Structure and Development | homing              | homing of neutrophils       | 1,56E-17 | CCL2, CCL3, CCL4, CCL5, CD28, CORO1A, CSF3R, CXCL1, CXCL2, CXCL6, CXCL10, FCER1G, FGR, FPR1, HCK, IL1B, ITGB2, LSP1, PTPN6, RAC2, S100A8, TAC1, WAS, XCL1                                 | 24 |
| Lymphoid Tissue Structure and Development | homing              | homing of eosinophils       | 2,60E-09 | C3, CCL2, CCL3, CCL5, CCL11, CXCL9, CXCL10, CXCR3, FPR1, WAS                                                                                                                              | 10 |
| Lymphoid Tissue Structure and Development | chemotaxis          | chemotaxis of myeloid cells | 7,75E-19 | C3, CCL2, CCL3, CCL4, CCL5, CCL11, CD28, CORO1A, CSF3R, CXCL1, CXCL2, CXCL6, CXCL9, CXCL10, CXCR3, FCER1G, FGR, FPR1, HCK, IL1B, ITGB2, LSP1, PTPN6, PTPRC, RAC2, S100A8, TAC1, XCL1      | 28 |
| Lymphoid Tissue Structure and Development | chemotaxis          | chemotaxis of granulocytes  | 7,31E-18 | C3, CCL2, CCL3, CCL4, CCL5, CCL11, CD28, CORO1A, CSF3R, CXCL1, CXCL2, CXCL6, CXCL9, CXCL10, CXCR3, FCER1G, FGR, FPR1, HCK, IL1B, ITGB2, LSP1, PTPN6, RAC2, S100A8, TAC1, XCL1             | 27 |
| Lymphoid Tissue Structure and Development | chemotaxis          | chemotaxis of neutrophils   | 1,64E-16 | CCL2, CCL3, CCL4, CCL5, CD28, CORO1A, CSF3R, CXCL1, CXCL2, CXCL6, CXCL10, FCER1G, FGR, FPR1, HCK, IL1B, ITGB2, LSP1, PTPN6, RAC2, S100A8, TAC1, XCL1                                      | 23 |
| Lymphoid Tissue Structure and Development | chemotaxis          | chemotaxis of eosinophils   | 3,45E-08 | C3, CCL2, CCL3, CCL5, CCL11, CXCL9, CXCL10, CXCR3, FPR1                                                                                                                                   | 9  |
| Lymphoid Tissue                           | formation           | formation of lymphatic      | 1,28E-11 | ADA, C3, CCL21, CD28, CXCL13, ICOS, LAX1, LTB, POU2AF1, SH2D1A, TAC1, TNFRSF1B, TNFSF13B, VAV1                                                                                            | 14 |

| Structure and Development                 |                            | system component                   |          |                                                                                                                                                                                                                                                                                                                                                                                                                                                                                                                                                                                                                                                                                                                                                                                                                 |  |     |
|-------------------------------------------|----------------------------|------------------------------------|----------|-----------------------------------------------------------------------------------------------------------------------------------------------------------------------------------------------------------------------------------------------------------------------------------------------------------------------------------------------------------------------------------------------------------------------------------------------------------------------------------------------------------------------------------------------------------------------------------------------------------------------------------------------------------------------------------------------------------------------------------------------------------------------------------------------------------------|--|-----|
| Lymphoid Tissue Structure and Development | formation                  | formation of germinal center       | 5,23E-11 | ADA, C3, CD28, CXCL13, ICOS, LAX1, LTB, POU2AF1, SH2D1A, TAC1, TNFSF13B, VAV1                                                                                                                                                                                                                                                                                                                                                                                                                                                                                                                                                                                                                                                                                                                                   |  | 12  |
| Lymphoid Tissue Structure and Development | quantity                   | quantity of granulocytes           | 4,90E-09 | ADA, ALOX5, C1QA, CCL11, CD1D, CD8A, CSF2RB, CSF3R, IL1B, ITGB2, JAK3, RAC2, S100A8, SELL, SELPLG, STAT4, TNFRSF25, TNFRSF1B                                                                                                                                                                                                                                                                                                                                                                                                                                                                                                                                                                                                                                                                                    |  | 18  |
| Lymphoid Tissue Structure and Development | quantity                   | quantity of myeloid cells          | 6,29E-09 | ADA, ALOX5, C1QA, CCL11, CD1D, CD8A, CSF2RB, CSF3R, IKZF1, IL1B, ITGB2, JAK3, RAC2, S100A8, SELL, SELPLG, STAT4, TNFRSF25, TNFRSF1B                                                                                                                                                                                                                                                                                                                                                                                                                                                                                                                                                                                                                                                                             |  | 19  |
| Lymphoid Tissue Structure and Development | quantity                   | quantity of lymphatic system cells | 7,93E-09 | ADA, ALOX5, C1QA, CCL11, CD1D, CD8A, CSF2RB, CSF3R, CXCL13, IKZF1, IL1B, ITGB2, JAK3, PSMB10, RAC2, S100A8, SELL, SELPLG, STAT4, TNFRSF25, TNFRSF1B                                                                                                                                                                                                                                                                                                                                                                                                                                                                                                                                                                                                                                                             |  | 21  |
| Lymphoid Tissue Structure and Development | development                | development of lymph node          | 9,31E-08 | CCL19, CCL21, CCR7, CXCL13, IKZF1, IL7R, JAK3, LTB                                                                                                                                                                                                                                                                                                                                                                                                                                                                                                                                                                                                                                                                                                                                                              |  | 8   |
| Connective Tissue Disorders               | rheumatic disease          | rheumatic disease                  | 9,52E-20 | ADAM8, AG2, AIF1, ALOX5, C2, C3, C1QA, C3AR1, CASP1, CCL2, CCL3, CCL4, CCL5, CCL11, CCL18, CCL19, CCL21, CCR2, CCR5, CCRL2, CD4, CD6, CD19, CD22, CD27, CD28, CD53, CD69, CD86, CD3D, CD79A, CIITA, CR2, CSF2RB, CSF3R, CTSS, CXCL1, CXCL2, CXCL6, CXCL9, CXCL10, CXCL13, DEF6, FCER1G, FCN1, FCRL3, FGB, GABBR1, GBP2, GNLY, GPSM3, GRN, GZMA, GZMB, HCK, HCLS1, HLA-DMB, HLA-DOA, HLA-DOB, HLA-DPA1, HLA-DPB1, HLA-DQA1, HLA-DQB1, HLA-DRB1, ICOS, IGHD, IGHG1, IGHM, IGKC, IGL@, IKZF1, IL16, IL10RA, IL1B, IL1RN, IL27RA, IL2RB, IL7R, ITGAL, ITGB2, LCK, LCP1, LST1, LTB, LTF, LYZ, MAP4K1, MS4A1, MS4A7, NCF1, NCF4, NCF1C, NOD2, P2RY13, PRKCB, PSMB9, PTGDS, PTPN6, PTPN22, PTPRC, RUNX3, S100A8, SAA1, SERPINA3, SH2D1A, SP140, STAT1, STAT4, TAC1, TAGAP, TAP1, TIMP1, TLR7, TNFRSF1B, TNFSF13B, XCL1 |  | 116 |
| Connective Tissue Disorders               | rheumatic disease          | rheumatic disease of mammalia      | 1,87E-17 | C2, C3, CASP1, CCL2, CCL5, CCR2, CD4, CD22, CD69, CIITA, CR2, CTSS, DEF6, FCER1G, HLA-DRB1, ICOS, IGHG1, IL1B, IL1RN, IL27RA, IL2RB, LTF, NCF1, NCF1C, SH2D1A, STAT1, STAT4, TAP1, TNFRSF1B, TNFSF13B                                                                                                                                                                                                                                                                                                                                                                                                                                                                                                                                                                                                           |  | 30  |
| Connective Tissue Disorders               | rheumatic disease          | rheumatic disease of rodents       | 4,29E-16 | C3, CASP1, CCL2, CCL5, CCR2, CD4, CD22, CD69, CIITA, CR2, CTSS, DEF6, FCER1G, ICOS, IGHG1, IL1B, IL1RN, IL27RA, IL2RB, LTF, NCF1, NCF1C, SH2D1A, STAT1, STAT4, TAP1, TNFRSF1B, TNFSF13B                                                                                                                                                                                                                                                                                                                                                                                                                                                                                                                                                                                                                         |  | 28  |
| Connective Tissue Disorders               | rheumatic disease          | rheumatic disease of mice          | 5,69E-16 | C3, CASP1, CCL2, CCR2, CD4, CD22, CD69, CIITA, CR2, CTSS, DEF6, FCER1G, ICOS, IGHG1, IL1B, IL1RN, IL27RA, IL2RB, LTF, NCF1, NCF1C, SH2D1A, STAT1, STAT4, TAP1, TNFRSF1B, TNFSF13B                                                                                                                                                                                                                                                                                                                                                                                                                                                                                                                                                                                                                               |  | 27  |
| Connective Tissue Disorders               | connective tissue disorder | connective tissue disorder         | 1,76E-19 | ADAM8, AG2, AIF1, ALOX5, C2, C3, C1QA, C3AR1, CASP1, CCL2, CCL3, CCL4, CCL5, CCL11, CCL18, CCL19, CCL21, CCR2, CCR5, CCRL2, CD4, CD6, CD19, CD22, CD27, CD28, CD53, CD69, CD86, CD96, CD3D, CD79A, CIITA, CR2, CSF2RB, CSF3R, CTSS, CXCL1, CXCL2, CXCL6, CXCL9, CXCL10, CXCL13, DEF6, FCER1G, FCN1, FCRL3, FGB, GABBR1, GBP2, GNLY, GPSM3, GRN, GZMA, GZMB, HCK, HCLS1, HLA-DMB, HLA-DOA, HLA-DOB, HLA-DPA1, HLA-DPB1, HLA-DQA1, HLA-DQB1, HLA-DRB1, ICOS, IGHD, IGHG1, IGHM, IGKC, IGL@, IKZF1, IL16, IL10RA, IL1B, IL1RN, IL27RA, IL2RB, IL7R, ITGAL, ITGB2, LCK, LCP1, LST1, LTB, LTF, LYZ, MAN2B1, MAP4K1, MMP7, MS4A1, MS4A7, NCF1, NCF4, NCF1C, NOD2, P2RY13, PRKCB, PSMB9, PTGDS, PTPN6, PTPN22,                                                                                                         |  | 119 |

|                                 |                                  |                                          |          |                                                                                                                                                                                                                                                                                                                                                                                                                                                                                                                                                                                                                                                                                                                                                                                  |     |
|---------------------------------|----------------------------------|------------------------------------------|----------|----------------------------------------------------------------------------------------------------------------------------------------------------------------------------------------------------------------------------------------------------------------------------------------------------------------------------------------------------------------------------------------------------------------------------------------------------------------------------------------------------------------------------------------------------------------------------------------------------------------------------------------------------------------------------------------------------------------------------------------------------------------------------------|-----|
| Connective Tissue Disorders     | arthritis                        | arthritis                                | 1,37E-18 | PTPRC, RUNX3, S100A8, SAA1, SERPINA3, SH2D1A, SP140, STAT1, STAT4, TAC1, TAGAP, TAP1, TIMP1, TLR7, TNFRSF1B, TNFSF13B, XCL1                                                                                                                                                                                                                                                                                                                                                                                                                                                                                                                                                                                                                                                      | 111 |
| Connective Tissue Disorders     | arthritis                        | arthritis of mammalia                    | 1,29E-14 | ADAM8, AG2, AIF1, ALOX5, C2, C3, C1QA, C3AR1, CASP1, CCL2, CCL3, CCL4, CCL5, CCL11, CCL18, CCL19, CCL21, CCR2, CCR5, CCRL2, CD4, CD6, CD27, CD28, CD53, CD69, CD86, CD3D, CD79A, CIITA, CR2, CSF2RB, CSF3R, CTSS, CXCL1, CXCL2, CXCL6, CXCL9, CXCL10, CXCL13, DEF6, FCER1G, FCN1, FCRL3, FGB, GABBR1, GBP2, GNLY, GPSM3, GRN, GZMA, GZMB, HCK, HCLS1, HLA-DMB, HLA-DOA, HLA-DOB, HLA-DPA1, HLA-DPB1, HLA-DQA1, HLA-DQB1, HLA-DRB1, ICOS, IGHD, IGHG1, IGHM, IGKC, IGL@, IKZF1, IL16, IL10RA, IL1B, IL1RN, IL27RA, IL2RB, IL7R, ITGAL, ITGB2, LCP1, LST1, LTB, LTF, LYZ, MAP4K1, MS4A1, MS4A7, NCF1, NCF4, NCF1C, NOD2, P2RY13, PRKCB, PSMB9, PTGDS, PTPN6, PTPN22, PTPRC, RUNX3, S100A8, SAA1, SERPINA3, SP140, STAT1, STAT4, TAC1, TAGAP, TAP1, TIMP1, TNFRSF1B, TNFSF13B, XCL1 | 26  |
| Connective Tissue Disorders     | arthritis                        | arthritis of rodents                     | 5,19E-14 | C3, CASP1, CCL2, CCL5, CCR2, CD4, CD69, CIITA, CR2, CTSS, DEF6, FCER1G, ICOS, IGHG1, IL1B, IL1RN, IL27RA, IL2RB, LTF, NCF1, NCF1C, STAT1, STAT4, TNFRSF1B, TNFSF13B                                                                                                                                                                                                                                                                                                                                                                                                                                                                                                                                                                                                              | 25  |
| Connective Tissue Disorders     | arthritis                        | arthritis of mice                        | 7,21E-14 | C3, CASP1, CCL2, CCR2, CD4, CD69, CIITA, CR2, CTSS, DEF6, FCER1G, ICOS, IGHG1, IL1B, IL1RN, IL27RA, IL2RB, LTF, NCF1, NCF1C, STAT1, STAT4, TNFRSF1B, TNFSF13B                                                                                                                                                                                                                                                                                                                                                                                                                                                                                                                                                                                                                    | 24  |
| Connective Tissue Disorders     | rheumatoid arthritis             | rheumatoid arthritis                     | 5,51E-15 | ADAM8, AG2, AIF1, ALOX5, C2, C1QA, C3AR1, CCL2, CCL3, CCL4, CCL5, CCL11, CCL18, CCL19, CCL21, CCR2, CCR5, CCRL2, CD4, CD6, CD28, CD53, CD69, CD86, CD3D, CD79A, CIITA, CR2, CSF2RB, CSF3R, CXCL1, CXCL2, CXCL6, CXCL9, CXCL10, CXCL13, DEF6, FCN1, FCRL3, GABBR1, GBP2, GNLY, GPSM3, GRN, GZMA, GZMB, HCK, HCLS1, HLA-DMB, HLA-DOA, HLA-DOB, HLA-DPA1, HLA-DPB1, HLA-DQA1, HLA-DQB1, HLA-DRB1, ICOS, IGHG1, IGHM, IGL@, IKZF1, IL16, IL10RA, IL1B, IL1RN, IL2RB, IL7R, ITGAL, ITGB2, LCP1, LST1, LTB, LTF, LYZ, MS4A1, MS4A7, NCF4, NOD2, P2RY13, PSMB9, PTPN22, PTPRC, S100A8, SAA1, SERPINA3, SP140, STAT1, STAT4, TAC1, TAGAP, TAP1, TIMP1, TNFRSF1B, TNFSF13B, XCL1                                                                                                          | 95  |
| Connective Tissue Disorders     | psoriatic arthritis              | psoriatic arthritis                      | 7,74E-12 | CD27, CXCL9, IGHD, IGHG1, IGHM, IGKC, ITGAL, MAP4K1, MS4A1, NOD2, PRKCB, PTPN6, RUNX3, S100A8, SAA1, TNFRSF1B                                                                                                                                                                                                                                                                                                                                                                                                                                                                                                                                                                                                                                                                    | 16  |
| Connective Tissue Disorders     | collagen-induced arthritis       | collagen-induced arthritis of mice       | 6,34E-09 | CCR2, CD69, CR2, CTSS, ICOS, IGHG1, IL1B, IL1RN, IL2RB, STAT1, STAT4, TNFRSF1B, TNFSF13B                                                                                                                                                                                                                                                                                                                                                                                                                                                                                                                                                                                                                                                                                         | 13  |
| Connective Tissue Disorders     | systemic lupus erythematosus     | systemic lupus erythematosus             | 6,67E-09 | C2, C1QA, CD19, CD22, CD86, CR2, ICOS, IL16, IL7R, MS4A1, PTPN22, PTPRC, SH2D1A, STAT4, TAP1, TNFSF13B                                                                                                                                                                                                                                                                                                                                                                                                                                                                                                                                                                                                                                                                           | 16  |
| Connective Tissue Disorders     | juvenile rheumatoid arthritis    | juvenile rheumatoid arthritis            | 8,59E-09 | ALOX5, CCL3, CCL4, CCL5, CD69, CD86, GNLY, GZMA, IL1B, IL1RN, NCF4, P2RY13, PTPRC, S100A8, TNFSF13B                                                                                                                                                                                                                                                                                                                                                                                                                                                                                                                                                                                                                                                                              | 15  |
| Connective Tissue Disorders     | experimentally-induced arthritis | experimentally-induced arthritis         | 3,37E-08 | C3, CCL4, CCR2, CCR5, CD69, CR2, CTSS, ICOS, IGHG1, IL1B, IL1RN, IL2RB, STAT1, STAT4, TNFRSF1B, TNFSF13B                                                                                                                                                                                                                                                                                                                                                                                                                                                                                                                                                                                                                                                                         | 16  |
| Connective Tissue Disorders     | experimentally-induced arthritis | experimentally-induced arthritis of mice | 3,37E-08 | C3, CCR2, CD69, CR2, CTSS, ICOS, IGHG1, IL1B, IL1RN, IL2RB, STAT1, STAT4, TNFRSF1B, TNFSF13B                                                                                                                                                                                                                                                                                                                                                                                                                                                                                                                                                                                                                                                                                     | 14  |
| Skeletal and Muscular Disorders | rheumatic disease                | rheumatic disease                        | 9,52E-20 | ADAM8, AG2, AIF1, ALOX5, C2, C3, C1QA, C3AR1, CASP1, CCL2, CCL3, CCL4, CCL5, CCL11, CCL18, CCL19, CCL21, CCR2, CCR5, CCRL2, CD4, CD6, CD19, CD22, CD27, CD28, CD53, CD69, CD86, CD3D, CD79A, CIITA, CR2, CSF2RB, CSF3R, CTSS, CXCL1, CXCL2, CXCL6, CXCL9, CXCL10, CXCL13, DEF6, FCER1G, FCN1, FCRL3, FGB, GABBR1, GBP2, GNLY, GPSM3, GRN, GZMA, GZMB, HCK, HCLS1, HLA-DMB, HLA-DOA, HLA-DOB, HLA-DPA1, HLA-DPB1, HLA-DQA1, HLA-DQB1, HLA-DRB1, ICOS, IGHD, IGHG1, IGHM, IGKC, IGL@, IKZF1, IL16, IL10RA, IL1B, IL1RN, IL27RA, IL2RB, IL7R, ITGAL, ITGB2, LCK, LCP1, LST1, LTB, LTF, LYZ, MAP4K1, MS4A1, MS4A7, NCF1, NCF4, NCF1C, NOD2, P2RY13, PRKCB, PSMB9, PTGDS, PTPN6, PTPN22, PTPRC, RUNX3, S100A8, SAA1,                                                                  | 116 |

|                                 |                                |                                           |          |                                                                                                                                                                                                                                                                                                                                                                                                                                                                                                                                                                                                                                                                                                                                                                                  |     |
|---------------------------------|--------------------------------|-------------------------------------------|----------|----------------------------------------------------------------------------------------------------------------------------------------------------------------------------------------------------------------------------------------------------------------------------------------------------------------------------------------------------------------------------------------------------------------------------------------------------------------------------------------------------------------------------------------------------------------------------------------------------------------------------------------------------------------------------------------------------------------------------------------------------------------------------------|-----|
|                                 |                                |                                           |          | SERPINA3, SH2D1A, SP140, STAT1, STAT4, TAC1, TAGAP, TAP1, TIMP1, TLR7, TNFRSF1B, TNFSF13B, XCL1                                                                                                                                                                                                                                                                                                                                                                                                                                                                                                                                                                                                                                                                                  |     |
| Skeletal and Muscular Disorders | rheumatic disease              | rheumatic disease of mammalia             | 1,87E-17 | C2, C3, CASP1, CCL2, CCL5, CCR2, CD4, CD22, CD69, CIITA, CR2, CTSS, DEF6, FCER1G, HLA-DRB1, ICOS, IGHG1, IL1B, IL1RN, IL27RA, IL2RB, LTF, NCF1, NCF1C, SH2D1A, STAT1, STAT4, TAP1, TNFRSF1B, TNFSF13B                                                                                                                                                                                                                                                                                                                                                                                                                                                                                                                                                                            | 30  |
| Skeletal and Muscular Disorders | rheumatic disease              | rheumatic disease of rodents              | 4,29E-16 | C3, CASP1, CCL2, CCL5, CCR2, CD4, CD22, CD69, CIITA, CR2, CTSS, DEF6, FCER1G, ICOS, IGHG1, IL1B, IL1RN, IL27RA, IL2RB, LTF, NCF1, NCF1C, SH2D1A, STAT1, STAT4, TAP1, TNFRSF1B, TNFSF13B                                                                                                                                                                                                                                                                                                                                                                                                                                                                                                                                                                                          | 28  |
| Skeletal and Muscular Disorders | rheumatic disease              | rheumatic disease of mice                 | 5,69E-16 | C3, CASP1, CCL2, CCR2, CD4, CD22, CD69, CIITA, CR2, CTSS, DEF6, FCER1G, ICOS, IGHG1, IL1B, IL1RN, IL27RA, IL2RB, LTF, NCF1, NCF1C, SH2D1A, STAT1, STAT4, TAP1, TNFRSF1B, TNFSF13B                                                                                                                                                                                                                                                                                                                                                                                                                                                                                                                                                                                                | 27  |
| Skeletal and Muscular Disorders | arthritis                      | arthritis                                 | 1,37E-18 | ADAM8, AG2, AIF1, ALOX5, C2, C3, C1QA, C3AR1, CASP1, CCL2, CCL3, CCL4, CCL5, CCL11, CCL18, CCL19, CCL21, CCR2, CCR5, CCRL2, CD4, CD6, CD27, CD28, CD53, CD69, CD86, CD3D, CD79A, CIITA, CR2, CSF2RB, CSF3R, CTSS, CXCL1, CXCL2, CXCL6, CXCL9, CXCL10, CXCL13, DEF6, FCER1G, FCN1, FCRL3, FGB, GABBR1, GBP2, GNLY, GPSM3, GRN, GZMA, GZMB, HCK, HCLS1, HLA-DMB, HLA-DOA, HLA-DOB, HLA-DPA1, HLA-DPB1, HLA-DQA1, HLA-DQB1, HLA-DRB1, ICOS, IGHD, IGHG1, IGHM, IGKC, IGL@, IKZF1, IL16, IL10RA, IL1B, IL1RN, IL27RA, IL2RB, IL7R, ITGAL, ITGB2, LCP1, LST1, LTB, LTF, LYZ, MAP4K1, MS4A1, MS4A7, NCF1, NCF4, NCF1C, NOD2, P2RY13, PRKCB, PSMB9, PTGDS, PTPN6, PTPN22, PTPRC, RUNX3, S100A8, SAA1, SERPINA3, SP140, STAT1, STAT4, TAC1, TAGAP, TAP1, TIMP1, TNFRSF1B, TNFSF13B, XCL1 | 111 |
| Skeletal and Muscular Disorders | arthritis                      | arthritis of mammalia                     | 1,29E-14 | C3, CASP1, CCL2, CCL5, CCR2, CD4, CD69, CIITA, CR2, CTSS, DEF6, FCER1G, HLA-DRB1, ICOS, IGHG1, IL1B, IL1RN, IL27RA, IL2RB, LTF, NCF1, NCF1C, STAT1, STAT4, TNFRSF1B, TNFSF13B                                                                                                                                                                                                                                                                                                                                                                                                                                                                                                                                                                                                    | 26  |
| Skeletal and Muscular Disorders | arthritis                      | arthritis of rodents                      | 5,19E-14 | C3, CASP1, CCL2, CCL5, CCR2, CD4, CD69, CIITA, CR2, CTSS, DEF6, FCER1G, ICOS, IGHG1, IL1B, IL1RN, IL27RA, IL2RB, LTF, NCF1, NCF1C, STAT1, STAT4, TNFRSF1B, TNFSF13B                                                                                                                                                                                                                                                                                                                                                                                                                                                                                                                                                                                                              | 25  |
| Skeletal and Muscular Disorders | arthritis                      | arthritis of mice                         | 7,21E-14 | C3, CASP1, CCL2, CCR2, CD4, CD69, CIITA, CR2, CTSS, DEF6, FCER1G, ICOS, IGHG1, IL1B, IL1RN, IL27RA, IL2RB, LTF, NCF1, NCF1C, STAT1, STAT4, TNFRSF1B, TNFSF13B                                                                                                                                                                                                                                                                                                                                                                                                                                                                                                                                                                                                                    | 24  |
| Skeletal and Muscular Disorders | rheumatoid arthritis           | rheumatoid arthritis                      | 5,51E-15 | ADAM8, AG2, AIF1, ALOX5, C2, C1QA, C3AR1, CCL2, CCL3, CCL4, CCL5, CCL11, CCL18, CCL19, CCL21, CCR2, CCR5, CCRL2, CD4, CD6, CD28, CD53, CD69, CD86, CD3D, CD79A, CIITA, CR2, CSF2RB, CSF3R, CXCL1, CXCL2, CXCL6, CXCL9, CXCL10, CXCL13, DEF6, FCN1, FCRL3, GABBR1, GBP2, GNLY, GPSM3, GRN, GZMA, GZMB, HCK, HCLS1, HLA-DMB, HLA-DOA, HLA-DOB, HLA-DPA1, HLA-DPB1, HLA-DQA1, HLA-DQB1, HLA-DRB1, ICOS, IGHG1, IGHM, IGL@, IKZF1, IL16, IL10RA, IL1B, IL1RN, IL2RB, IL7R, ITGAL, ITGB2, LCP1, LST1, LTB, LTF, LYZ, MS4A1, MS4A7, NCF4, NOD2, P2RY13, PSMB9, PTPN22, PTPRC, S100A8, SAA1, SERPINA3, SP140, STAT1, STAT4, TAC1, TAGAP, TAP1, TIMP1, TNFRSF1B, TNFSF13B, XCL1                                                                                                          | 95  |
| Skeletal and Muscular Disorders | skeletal and muscular disorder | skeletal and muscular disorder of mice    | 3,05E-13 | C3, CASP1, CCL2, CCR2, CD4, CD22, CD69, CD86, CIITA, CR2, CSF1R, CTSS, DEF6, FCER1G, ICOS, IGHG1, IL1B, IL1RN, IL27RA, IL2RB, ITGB2, LTF, NCF1, NCF1C, SH2D1A, STAT1, STAT4, TAP1, TNFRSF1B, TNFSF13B                                                                                                                                                                                                                                                                                                                                                                                                                                                                                                                                                                            | 30  |
| Skeletal and Muscular Disorders | skeletal and muscular disorder | skeletal and muscular disorder of rodents | 3,18E-13 | C3, CASP1, CCL2, CCL5, CCR2, CD4, CD22, CD69, CD86, CIITA, CR2, CSF1R, CTSS, DEF6, FCER1G, ICOS, IGHG1, IL1B, IL1RN, IL27RA, IL2RB, ITGB2, LTF, NCF1, NCF1C, SH2D1A, STAT1, STAT4, TAP1, TNFRSF1B, TNFSF13B                                                                                                                                                                                                                                                                                                                                                                                                                                                                                                                                                                      | 31  |
| Skeletal and Muscular Disorders | skeletal and muscular disorder | skeletal and muscular disorder            | 3,14E-11 | ADAM8, AG2, AIF1, ALOX5, BCL11B, BTK, C2, C3, C1QA, C3AR1, CASP1, CCL2, CCL3, CCL4, CCL5, CCL11, CCL18, CCL19, CCL21, CCR2, CCR5, CCRL2, CD4, CD6, CD14, CD19, CD22, CD27, CD28, CD52, CD53, CD69, CD86, CD96, CD1E, CD3D, CD79A, CIITA, CP, CR2, CSF1R, CSF2RB, CSF3R, CTSS, CXCL1, CXCL2, CXCL6, CXCL9, CXCL10, CXCL13, CYTH4, DEF6, EVI2B, FCER1G, FCN1, FCRL3, FGB, FPR1, GABBR1, GBP2, GNLY, GPSM3, GRN, GZMA, GZMB, HCK, HCLS1, HLA-DMB, HLA-DOA, HLA-DOB, HLA-DPA1, HLA-DPB1, HLA-DQA1, HLA-DQB1, HLA-DRB1, HLA-F, ICOS, IDO1, IGHD, IGHG1, IGHM, IGKC, IGL@, IKZF1, IL16, IL10RA, IL1B, IL1RN, IL27RA, IL2RB, IL7R, IMPDH1, ITGAL, ITGB2, KIAA1199, KLRB1, LCK, LCN2, LCP1, LRG1, LST1, LTB, LTF, LY96, LYZ,                                                             | 137 |

|                                 |                                          |                                          |          |                                                                                                                                                                                                                                                                                                                                                                                                                                                                                                                                                  |    |
|---------------------------------|------------------------------------------|------------------------------------------|----------|--------------------------------------------------------------------------------------------------------------------------------------------------------------------------------------------------------------------------------------------------------------------------------------------------------------------------------------------------------------------------------------------------------------------------------------------------------------------------------------------------------------------------------------------------|----|
| Skeletal and Muscular Disorders | psoriatic arthritis                      | psoriatic arthritis                      | 7,74E-12 | MAP4K1, MS4A1, MS4A7, NCF1, NCF4, NCF1C, NOD2, P2RY13, PRKCB, PSMB9, PTGDS, PTPN6, PTPN22, PTPRC, RARRES3, RTN1, RUNX3, S100A8, SAA1, SERPINA3, SH2D1A, SP140, STAT1, STAT4, TAC1, TAGAP, TAP1, TIMP1, TLR7, TNFRSF1B, TNFSF13B, XCL1                                                                                                                                                                                                                                                                                                            | 16 |
| Skeletal and Muscular Disorders | collagen-induced arthritis               | collagen-induced arthritis of mice       | 6,34E-09 | CCR2, CD69, CR2, CTSS, ICOS, IGHG1, IL1B, IL1RN, IL2RB, STAT1, STAT4, TNFRSF1B, TNFSF13B                                                                                                                                                                                                                                                                                                                                                                                                                                                         | 13 |
| Skeletal and Muscular Disorders | systemic lupus erythematosus             | systemic lupus erythematosus             | 6,67E-09 | C2, C1QA, CD19, CD22, CD86, CR2, ICOS, IL16, IL7R, MS4A1, PTPN22, PTPRC, SH2D1A, STAT4, TAP1, TNFSF13B                                                                                                                                                                                                                                                                                                                                                                                                                                           | 16 |
| Skeletal and Muscular Disorders | juvenile rheumatoid arthritis            | juvenile rheumatoid arthritis            | 8,59E-09 | ALOX5, CCL3, CCL4, CCL5, CD69, CD86, GNLY, GZMA, IL1B, IL1RN, NCF4, P2RY13, PTPRC, S100A8, TNFSF13B                                                                                                                                                                                                                                                                                                                                                                                                                                              | 15 |
| Skeletal and Muscular Disorders | experimentally-induced arthritis         | experimentally-induced arthritis         | 3,37E-08 | C3, CCL4, CCR2, CCR5, CD69, CR2, CTSS, ICOS, IGHG1, IL1B, IL1RN, IL2RB, STAT1, STAT4, TNFRSF1B, TNFSF13B                                                                                                                                                                                                                                                                                                                                                                                                                                         | 16 |
| Skeletal and Muscular Disorders | experimentally-induced arthritis of mice | experimentally-induced arthritis of mice | 3,37E-08 | C3, CCR2, CD69, CR2, CTSS, ICOS, IGHG1, IL1B, IL1RN, IL2RB, STAT1, STAT4, TNFRSF1B, TNFSF13B                                                                                                                                                                                                                                                                                                                                                                                                                                                     | 14 |
| Post-Translational Modification | tyrosine phosphorylation                 | tyrosine phosphorylation of protein      | 1,46E-19 | CCL3, CCL4, CCL5, CCL11, CD2, CD4, CD19, CD28, CD48, CD247, CD3E, CD79A, CD8A, CLEC4C, CSF1R, FCER1G, FCRL3, FCRL5, HCK, IGHM, IL1B, ITGB2, JAK3, LAX1, LCK, PTPN6, PTPN22, PTPRC, SELL, SH2D1A, SPIB, TAC1, TYROBP, ZAP70                                                                                                                                                                                                                                                                                                                       | 34 |
| Post-Translational Modification | phosphorylation                          | phosphorylation of protein               | 1,04E-15 | CCL3, CCL4, CCL5, CCL11, CD2, CD4, CD6, CD19, CD28, CD48, CD247, CD3E, CD79A, CD8A, CLEC4C, CSF1R, FCER1G, FCRL3, FCRL5, HCK, IGHM, IL1B, ITGB2, JAK3, LAX1, LCK, PTPN6, PTPN22, PTPRC, SELL, SH2D1A, SPIB, STAT1, TAC1, TYROBP, ZAP70                                                                                                                                                                                                                                                                                                           | 36 |
| Post-Translational Modification | moiety attachment                        | moiety attachment of protein             | 1,64E-09 | CCL3, CCL4, CCL5, CCL11, CD2, CD4, CD6, CD19, CD22, CD28, CD37, CD48, CD247, CD3E, CD79A, CD8A, CLEC4C, CSF1R, FCER1G, FCRL3, FCRL5, HCK, IGHM, IL1B, ITGB2, JAK3, LAX1, LCK, PTPN6, PTPN22, PTPRC, SELL, SH2D1A, SPIB, STAT1, TAC1, TYROBP, ZAP70                                                                                                                                                                                                                                                                                               | 38 |
| Hematological Disease           | hematological disorder                   | hematological disorder                   | 6,30E-19 | ADA, ALOX5, BTK, C2, C3, C1QA, CASP1, CCL2, CCL3, CCL4, CCL5, CCL11, CCR2, CCR5, CD2, CD4, CD14, CD19, CD22, CD27, CD28, CD52, CD86, CD247, CD3D, CD3E, CD3G, CPA3, CSF1R, CSF2RB, CSF3R, CTSS, CXCL1, CXCL9, CXCL10, CXCL13, CYSLTR1, DARC, DEF6, FCER1G, FCGR3B, FGB, FGR, FYB, HCLS1, ICOS, IGHM, IKZF1, IL1B, IL1RN, IL27RA, IL2RB, IL2RG, IL7R, IMPDH1, IRF1, IRF4, ITGB2, ITK, JAK3, KLRK1, LCK, LCN2, MMP7, MS4A1, MYB (includes EG:4602), PRF1, PRKCB, PTGDS, PTPN6, PTTG1, RAC2, SELL, STAT4, TLR7, TNFRSF1B, VAV1, WAS, ZAP70, ZC3H12A | 80 |
| Hematological Disease           | hematological disorder                   | hematological disorder of mammalia       | 2,49E-09 | C3, CASP1, CCL11, CD4, CD14, CD19, CD28, CD3E, CSF3R, CXCL9, DEF6, FCER1G, HCLS1, ICOS, IKZF1, IL1RN, IL2RB, IL2RG, IL7R, ITGB2, JAK3, LCN2, PRF1, PTTG1, RAC2, STAT4, TLR7, TNFRSF1B, VAV1, ZC3H12A                                                                                                                                                                                                                                                                                                                                             | 30 |
| Hematological Disease           | hematological disorder                   | hematological disorder of mice           | 7,26E-09 | C3, CASP1, CCL11, CD4, CD14, CD19, CD28, CD3E, CSF3R, DEF6, FCER1G, HCLS1, IKZF1, IL1RN, IL2RB, IL2RG, IL7R, ITGB2, JAK3, LCN2, PRF1, PTTG1, RAC2, STAT4, TLR7, TNFRSF1B, VAV1, ZC3H12A                                                                                                                                                                                                                                                                                                                                                          | 28 |
| Hematological Disease           | hematological cancer                     | hematological cancer                     | 6,23E-13 | ADA, ALOX5, CCL3, CCL4, CD2, CD14, CD19, CD22, CD27, CD52, CD86, CD247, CD3D, CD3E, CD3G, CSF1R, CSF2RB, CSF3R, CXCL1, CXCL13, FGR, IKZF1, IL1B, IL2RB, IL2RG, IMPDH1, IRF4, ITGB2, JAK3, KLRK1, LCK, MS4A1, MYB (includes EG:4602), PRKCB, PTPN6, TLR7, ZAP70                                                                                                                                                                                                                                                                                   | 37 |
| Hematological Disease           | lymphocytic leukemia                     | lymphocytic leukemia                     | 3,53E-12 | ADA, CCL3, CCL4, CD14, CD19, CD22, CD52, CD86, CD247, CD3D, CD3E, CD3G, CSF2RB, CXCL13, IKZF1, IL1B, IL2RB, IL2RG, IRF4, ITGB2, LCK, MS4A1, PRKCB, TLR7, ZAP70                                                                                                                                                                                                                                                                                                                                                                                   | 25 |

|                       |                                           |                                                       |          |                                                                                                                                                                                                                                         |    |
|-----------------------|-------------------------------------------|-------------------------------------------------------|----------|-----------------------------------------------------------------------------------------------------------------------------------------------------------------------------------------------------------------------------------------|----|
| Hematological Disease | leukemia                                  | leukemia                                              | 1,16E-11 | ADA, ALOX5, CCL3, CCL4, CD2, CD14, CD19, CD22, CD52, CD86, CD247, CD3D, CD3E, CD3G, CSF1R, CSF2RB, CSF3R, CXCL13, FGR, IKZF1, IL1B, IL2RB, IL2RG, IMPDH1, IRF4, ITGB2, JAK3, LCK, MS4A1, PRKCB, PTPN6, TLR7, ZAP70                      | 33 |
| Hematological Disease | B-cell leukemia                           | B-cell leukemia                                       | 7,38E-10 | ADA, CCL3, CCL4, CD19, CD22, CD52, CD86, CD3E, IL1B, IL2RB, IL2RG, ITGB2, LCK, MS4A1, PRKCB, TLR7, ZAP70                                                                                                                                | 17 |
| Hematological Disease | disease                                   | disease of leukocytes                                 | 1,58E-09 | BTK, CASP1, CCL3, CCL5, CCR2, CCR5, CD4, CD86, FPR1, ICOS, IRF1, LTF, RARRES3                                                                                                                                                           | 13 |
| Hematological Disease | disease                                   | disease of mononuclear leukocytes                     | 6,19E-08 | BTK, CCL3, CCL5, CCR2, CCR5, CD4, CD86, FPR1, ICOS                                                                                                                                                                                      | 9  |
| Hematological Disease | chronic B-cell leukemia                   | chronic B-cell leukemia                               | 8,59E-09 | ADA, CCL3, CCL4, CD22, CD52, CD86, IL1B, IL2RB, IL2RG, ITGB2, LCK, MS4A1, PRKCB, TLR7, ZAP70                                                                                                                                            | 15 |
| Hematological Disease | infection                                 | infection of leukocytes                               | 1,20E-08 | CASP1, CCL3, CCL5, CCR2, CCR5, CD4, FPR1, IRF1, LTF, RARRES3                                                                                                                                                                            | 10 |
| Hematological Disease | eosinophilia                              | eosinophilia                                          | 3,00E-08 | ALOX5, CCL3, CCL11, CD4, CD86, CD247, CD3G, CPA3, CTSS, CXCL9, CYSLTR1, DEF6, IL2RG, ITK, LCK, PRF1                                                                                                                                     | 16 |
| Neurological Disease  | encephalitis                              | encephalitis                                          | 1,59E-17 | ALOX5, BTLA, C3, C3AR1, CASP1, CCL3, CCR2, CD28, CD86, CD1D, CXCL10, HLA-DQA1, HLA-DQB1, ICOS, IDO1, IGHG1, IL1RN, IL27RA, IRF4, ITGAL, LTB, MS4A1, NCF1, SELL, STAT1, STAT4, TIMP1, TYROBP, UBASH3A, UNC93B1                           | 30 |
| Neurological Disease  | encephalitis                              | encephalitis of mammalia                              | 7,05E-15 | ALOX5, BTLA, C3, C3AR1, CASP1, CCR2, CD28, CD86, CD1D, CXCL10, HLA-DQA1, HLA-DQB1, ICOS, IDO1, IGHG1, IL27RA, IRF4, ITGAL, LTB, NCF1, SELL, STAT1, STAT4, TYROBP, UBASH3A, UNC93B1                                                      | 26 |
| Neurological Disease  | encephalitis                              | encephalitis of rodents                               | 3,31E-14 | ALOX5, BTLA, C3, C3AR1, CASP1, CCR2, CD28, CD86, CD1D, CXCL10, HLA-DQA1, HLA-DQB1, ICOS, IDO1, IGHG1, IL27RA, IRF4, ITGAL, LTB, NCF1, SELL, STAT1, STAT4, TYROBP, UBASH3A                                                               | 25 |
| Neurological Disease  | encephalitis                              | encephalitis of mice                                  | 6,15E-13 | ALOX5, BTLA, C3, C3AR1, CASP1, CCR2, CD28, CD86, CD1D, CXCL10, HLA-DQA1, HLA-DQB1, ICOS, IDO1, IL27RA, IRF4, ITGAL, NCF1, SELL, STAT1, STAT4, TYROBP, UBASH3A                                                                           | 23 |
| Neurological Disease  | encephalomyelitis                         | encephalomyelitis                                     | 9,26E-16 | BTLA, C3, C3AR1, CASP1, CCL3, CCR2, CD28, CD86, CD1D, CXCL10, HLA-DQA1, HLA-DQB1, ICOS, IDO1, IGHG1, IL1RN, IL27RA, IRF4, ITGAL, LTB, NCF1, SELL, STAT1, STAT4, TIMP1, TYROBP, UBASH3A                                                  | 27 |
| Neurological Disease  | experimental autoimmune encephalomyelitis | experimental autoimmune encephalomyelitis of organism | 4,41E-15 | BTLA, C3, C3AR1, CASP1, CCL3, CCR2, CD28, CD86, CD1D, CXCL10, HLA-DQA1, HLA-DQB1, ICOS, IDO1, IGHG1, IL1RN, IL27RA, IRF4, ITGAL, LTB, NCF1, SELL, STAT1, STAT4, TYROBP, UBASH3A                                                         | 26 |
| Neurological Disease  | experimental autoimmune encephalomyelitis | experimental autoimmune encephalomyelitis of rodents  | 1,54E-13 | BTLA, C3, C3AR1, CASP1, CCR2, CD28, CD86, CD1D, CXCL10, HLA-DQA1, HLA-DQB1, ICOS, IDO1, IGHG1, IL27RA, IRF4, ITGAL, LTB, NCF1, SELL, STAT1, STAT4, TYROBP, UBASH3A                                                                      | 24 |
| Neurological Disease  | experimental autoimmune encephalomyelitis | experimental autoimmune encephalomyelitis of mice     | 2,82E-12 | BTLA, C3, C3AR1, CASP1, CCR2, CD28, CD86, CD1D, CXCL10, HLA-DQA1, HLA-DQB1, ICOS, IDO1, IL27RA, IRF4, ITGAL, NCF1, SELL, STAT1, STAT4, TYROBP, UBASH3A                                                                                  | 22 |
| Neurological Disease  | encephalopathy                            | encephalopathy of mice                                | 1,69E-12 | ALOX5, BTLA, C3, C3AR1, CASP1, CCR2, CD28, CD86, CD1D, CXCL10, CYBB, GABBR1, HLA-DQA1, HLA-DQB1, ICOS, IDO1, IL27RA, IRF4, ITGAL, NCF1, SELL, STAT1, STAT4, TAC1, TYROBP, UBASH3A                                                       | 26 |
| Neurological Disease  | encephalopathy                            | encephalopathy                                        | 1,19E-08 | ALOX5, BTLA, C3, C3AR1, CASP1, CCL2, CCL3, CCR2, CD28, CD86, CD1D, CXCL10, CYBB, GABBR1, HLA-DQA1, HLA-DQB1, ICOS, IDO1, IGHG1, IL1RN, IL27RA, IRF4, ITGAL, LTB, MS4A1, NCF1, SELL, STAT1, STAT4, TAC1, TIMP1, TYROBP, UBASH3A, UNC93B1 | 34 |
| Neurological Disease  | neurology                                 | neurological                                          | 5,78E-11 | ADA, ALOX5, BTLA, C3, C1QA, C3AR1, CASP1, CCL3, CCL21, CCR2, CD28,                                                                                                                                                                      | 40 |

|                           |                                  |                                   |          |                                                                                                                                                                                                                                                                                                                                                                                                                                                                                                                                                                                                                                                                                                                                                                                                                                                                                                                                                                                                                                                                                                                                      |     |
|---------------------------|----------------------------------|-----------------------------------|----------|--------------------------------------------------------------------------------------------------------------------------------------------------------------------------------------------------------------------------------------------------------------------------------------------------------------------------------------------------------------------------------------------------------------------------------------------------------------------------------------------------------------------------------------------------------------------------------------------------------------------------------------------------------------------------------------------------------------------------------------------------------------------------------------------------------------------------------------------------------------------------------------------------------------------------------------------------------------------------------------------------------------------------------------------------------------------------------------------------------------------------------------|-----|
| al Disease                | cal disorder                     | disorder of rodents               |          | CD86, CD1D, CTSS, CXCL1, CXCL2, CXCL10, CYBB, GABBR1, HLA-DQA1, HLA-DQB1, ICOS, IDO1, IGHG1, IL1B, IL1RN, IL27RA, IRF4, ITGAL, LTB, NCF1, PTGDS, SELL, ST8SIA4, STAT1, STAT4, TAC1, TNFRSF1B, TYROBP, UBASH3A                                                                                                                                                                                                                                                                                                                                                                                                                                                                                                                                                                                                                                                                                                                                                                                                                                                                                                                        |     |
| Neurologic al Disease     | neurological disorder            | neurological disorder of mice     | 1,23E-10 | ADA, ALOX5, BTLA, C3, C1QA, C3AR1, CASP1, CCL3, CCL21, CCR2, CD28, CD86, CD1D, CTSS, CXCL1, CXCL2, CXCL10, CYBB, GABBR1, HLA-DQA1, HLA-DQB1, ICOS, IDO1, IL1B, IL1RN, IL27RA, IRF4, ITGAL, NCF1, PTGDS, SELL, ST8SIA4, STAT1, STAT4, TAC1, TNFRSF1B, TYROBP, UBASH3A                                                                                                                                                                                                                                                                                                                                                                                                                                                                                                                                                                                                                                                                                                                                                                                                                                                                 | 38  |
| Neurologic al Disease     | neurological disorder            | neurological disorder of mammalia | 9,52E-10 | ADA, ALOX5, BTLA, C3, C1QA, C3AR1, CASP1, CCL2, CCL3, CCL21, CCR2, CD14, CD28, CD86, CD1D, CTSS, CXCL1, CXCL2, CXCL10, CYBB, GABBR1, HLA-DQA1, HLA-DQB1, HLA-DRB1, ICOS, IDO1, IGHG1, IL10RA, IL1B, IL1RN, IL27RA, IL2RB, IRF4, ITGAL, LTB, NCF1, PTGDS, SELL, ST8SIA4, STAT1, STAT4, TAC1, TNFRSF1B, TYROBP, UBASH3A, UCP2, UNC93B1                                                                                                                                                                                                                                                                                                                                                                                                                                                                                                                                                                                                                                                                                                                                                                                                 | 47  |
| Hypersensitivity Response | cell movement                    | cell movement of eosinophils      | 3,31E-17 | C3, CCL2, CCL3, CCL5, CCL11, CCL21, CD2, CD48, CXCL9, CXCL10, CXCR3, FPR1, ICAM2, IL1B, IL27RA, IL2RB, ITGAL, ITGB2, ITK, PLA2G7, RUNX3, WAS                                                                                                                                                                                                                                                                                                                                                                                                                                                                                                                                                                                                                                                                                                                                                                                                                                                                                                                                                                                         | 22  |
| Hypersensitivity Response | migration                        | migration of eosinophils          | 2,90E-14 | C3, CCL4, CCL5, CCL11, CXCL2, CXCL9, CXCL10, CXCL11, ICAM2, IL16, IL1B, ITGAL, ITGB2, LTF                                                                                                                                                                                                                                                                                                                                                                                                                                                                                                                                                                                                                                                                                                                                                                                                                                                                                                                                                                                                                                            | 14  |
| Hypersensitivity Response | activation                       | activation of mast cells          | 4,94E-11 | C3, CCL3, CCL5, CCR2, CD48, CD300A, FCER1G, FYB, IL27RA, LCP2, TAC1, TLR7, TLR8 (includes EG:51311)                                                                                                                                                                                                                                                                                                                                                                                                                                                                                                                                                                                                                                                                                                                                                                                                                                                                                                                                                                                                                                  | 13  |
| Hypersensitivity Response | homing                           | homing of eosinophils             | 2,60E-09 | C3, CCL2, CCL3, CCL5, CCL11, CXCL9, CXCL10, CXCR3, FPR1, WAS                                                                                                                                                                                                                                                                                                                                                                                                                                                                                                                                                                                                                                                                                                                                                                                                                                                                                                                                                                                                                                                                         | 10  |
| Hypersensitivity Response | infiltration                     | infiltration by eosinophils       | 6,64E-09 | CCL3, CCL5, CCL11, CCL21, CD2, CD48, IL27RA, IL2RB, ITK, PLA2G7, RUNX3                                                                                                                                                                                                                                                                                                                                                                                                                                                                                                                                                                                                                                                                                                                                                                                                                                                                                                                                                                                                                                                               | 11  |
| Hypersensitivity Response | chemotaxis                       | chemotaxis of eosinophils         | 3,45E-08 | C3, CCL2, CCL3, CCL5, CCL11, CXCL9, CXCL10, CXCR3, FPR1                                                                                                                                                                                                                                                                                                                                                                                                                                                                                                                                                                                                                                                                                                                                                                                                                                                                                                                                                                                                                                                                              | 9   |
| Hypersensitivity Response | degranulation                    | degranulation of mast cells       | 8,80E-08 | BTK, C3, C3AR1, CD300A, FCER1G, HCK, ITK, LAX1, LCP2, RAC2, VAV1                                                                                                                                                                                                                                                                                                                                                                                                                                                                                                                                                                                                                                                                                                                                                                                                                                                                                                                                                                                                                                                                     | 11  |
| Genetic Disorder          | leprosy                          | leprosy                           | 2,94E-16 | CCL3, CCL4, CCRL2, CD4, CD14, CD19, CD22, CD28, CD79A, CXCR3, FCER1G, IGHM, IGK@, IGL@, IL12RB1, IL2RB, IL2RG, LY86, SLAMF1, SLPI, TNFRSF17                                                                                                                                                                                                                                                                                                                                                                                                                                                                                                                                                                                                                                                                                                                                                                                                                                                                                                                                                                                          | 21  |
| Genetic Disorder          | lepomatous leprosy               | lepomatous leprosy                | 1,05E-13 | CCL3, CCL4, CCRL2, CD4, CD14, CD19, CD22, FCER1G, IGHM, IGK@, IGL@, IL2RB, IL2RG, LY86, TNFRSF17                                                                                                                                                                                                                                                                                                                                                                                                                                                                                                                                                                                                                                                                                                                                                                                                                                                                                                                                                                                                                                     | 15  |
| Genetic Disorder          | colitis                          | colitis                           | 2,94E-12 | ALOX5, CASP1, CCR2, CCR5, CD86, CD247, CD3D, CD3E, CD3G, CXCL10, EMR1, IGHM, IL1B, IL1RN, MMP7, MS4A1, NCF1, RUNX3, S100A8, STAT4, WAS                                                                                                                                                                                                                                                                                                                                                                                                                                                                                                                                                                                                                                                                                                                                                                                                                                                                                                                                                                                               | 21  |
| Genetic Disorder          | psoriatic arthritis              | psoriatic arthritis               | 7,74E-12 | CD27, CXCL9, IGHD, IGHG1, IGHM, IGKC, ITGAL, MAP4K1, MS4A1, NOD2, PRKCB, PTPN6, RUNX3, S100A8, SAA1, TNFRSF1B                                                                                                                                                                                                                                                                                                                                                                                                                                                                                                                                                                                                                                                                                                                                                                                                                                                                                                                                                                                                                        | 16  |
| Genetic Disorder          | severe combined immunodeficiency | severe combined immunodeficiency  | 3,08E-09 | ADA, BTK, CD247, CD3D, IL2RG, IL7R, JAK3, PTPRC                                                                                                                                                                                                                                                                                                                                                                                                                                                                                                                                                                                                                                                                                                                                                                                                                                                                                                                                                                                                                                                                                      | 8   |
| Cancer                    | tumorigenesis                    | tumorigenesis                     | 6,88E-15 | ADA, ADAM8, ADAMDEC1, AIM2, ALOX5, APOC1, ASCL2, BIRC3, BTK, C3, C15ORF48, C17ORF81, CARD16, CASP1, CCL2, CCL3, CCL4, CCL5, CCL11, CCL19, CCL21, CCR2, CCR5, CCR7, CD2, CD4, CD14, CD19, CD22, CD27, CD28, CD48, CD52, CD69, CD86, CD163, CD247, CD1D, CD3D, CD3E, CD3G, CD8A, CLEC10A, CP, CSF1R, CSF2RB, CSF3R, CST7, CTSS, CXCL1, CXCL2, CXCL9, CXCL10, CXCL13, CXCR3, CXCR6 (includes EG:10663), CYTIP, DARC, DGKA, ERAP2, FGR, FPR1, GABBR1, GBP2, GPR65, GPR183, GRN, GZMA, GZMB, GZMK, HCLS1, HLA-DOA, HMHA1, ICAM2, ICOS, IDO1, IFITM1, IGHG1, IGHM, IGJ, IGKC, IGL@, IKZF1, IL1B, IL1RN, IL27RA, IL2RB, IL2RG, IL7R, IMPDH1, IRF1, IRF4, ISG20, ITGB2, ITK, IVD, JAK3, KIAA1199, KLRK1, LCK, LCN2, LIMD2, LOC96610, LPAR5, LRG1, LSP1, LTB, LTF, LYZ, MAP4K1, MIR155HG, MMP7, MS4A1, MYB (includes EG:4602), NLRP7, NNMT, PHLDA2, PRF1, PRKCB, PSMB9, PTGDS, PTPN6, PTPRC, PTTG1, PYHIN1 (includes EG:149628), RASSF5, RGS1, RTN1, RUNX3, S100A8, SAA1, SECTM1, SELL, SERPINA3, SLC2A3, SLPI, STAT1, TARP, TCIRG1, TCL1A, TDO2, TIMP1, TLR7, TNFRSF1B, TNFSF13B, TRAT1, TYROBP, UCP2, VAV1, WARS, WFDC2, XAF1, XIIST, ZAP70 | 154 |

|        |                         |                         |          |                                                                                                                                                                                                                                                                                                                                                                                                                                                                                                                                                                                                                                                                                                                                                                                                                                                                                                                                                                                                                                                                   |     |
|--------|-------------------------|-------------------------|----------|-------------------------------------------------------------------------------------------------------------------------------------------------------------------------------------------------------------------------------------------------------------------------------------------------------------------------------------------------------------------------------------------------------------------------------------------------------------------------------------------------------------------------------------------------------------------------------------------------------------------------------------------------------------------------------------------------------------------------------------------------------------------------------------------------------------------------------------------------------------------------------------------------------------------------------------------------------------------------------------------------------------------------------------------------------------------|-----|
| Cancer | cancer                  | cancer                  | 3,87E-14 | ADA, ADAM8, ADAMDEC1, AIM2, ALOX5, APOC1, ASCL2, BIRC3, C3, C15ORF48, C17ORF81, CARD16, CASP1, CCL2, CCL3, CCL4, CCL5, CCL11, CCL19, CCL21, CCR2, CCR5, CCR7, CD2, CD14, CD19, CD22, CD27, CD28, CD48, CD52, CD69, CD86, CD163, CD247, CD3D, CD3E, CD3G, CD8A, CLEC10A, CP, CSF1R, CSF2RB, CSF3R, CST7, CTSS, CXCL1, CXCL2, CXCL9, CXCL10, CXCL13, CXCR3, CXCR6 (includes EG:10663), CYTIP, DGKA, ERAP2, FGR, GABBR1, GBP2, GPR65, GPR183, GRN, GZMA, GZMB, GZMK, HCLS1, HLA-DOA, HMHA1, ICOS, IDO1, IFITM1, IGHM, IGJ, IGKC, IGL@, IKZF1, IL1B, IL1RN, IL27RA, IL2RB, IL2RG, IL7R, IMPDH1, IRF1, IRF4, ISG20, ITGB2, ITK, IVD, JAK3, KIAA1199, KLRK1, LCK, LCN2, LIMD2, LOC96610, LPAR5, LRG1, LSP1, LTB, LTF, LYZ, MAP4K1, MIR155HG, MMP7, MS4A1, MYB (includes EG:4602), NLRP7, NNMT, PHLDA2, PRF1, PRKCB, PSMB9, PTGDS, PTPN6, PTPRC, PTTG1, PYHIN1 (includes EG:149628), RASSF5, RGS1, RTN1, RUNX3, S100A8, SAA1, SECTM1, SELL, SERPINA3, SLC2A3, SLPI, STAT1, TARP, TCL1A, TDO2, TIMP1, TLR7, TNFRSF1B, TRAT1, TYROBP, WARS, WFDC2, XAF1, XIST, ZAP70       | 143 |
| Cancer | neoplasia               | neoplasia               | 4,90E-14 | ADA, ADAM8, ADAMDEC1, AIM2, ALOX5, APOC1, ASCL2, BIRC3, C3, C15ORF48, C17ORF81, CARD16, CASP1, CCL2, CCL3, CCL4, CCL5, CCL11, CCL19, CCL21, CCR2, CCR5, CCR7, CD2, CD14, CD19, CD22, CD27, CD28, CD48, CD52, CD69, CD86, CD163, CD247, CD3D, CD3E, CD3G, CD8A, CLEC10A, CP, CSF1R, CSF2RB, CSF3R, CST7, CTSS, CXCL1, CXCL2, CXCL9, CXCL10, CXCL13, CXCR3, CXCR6 (includes EG:10663), CYTIP, DGKA, ERAP2, FGR, GABBR1, GBP2, GPR65, GPR183, GRN, GZMA, GZMB, GZMK, HCLS1, HLA-DOA, HMHA1, ICOS, IDO1, IFITM1, IGHM, IGJ, IGKC, IGL@, IKZF1, IL1B, IL1RN, IL27RA, IL2RB, IL2RG, IL7R, IMPDH1, IRF1, IRF4, ISG20, ITGB2, ITK, IVD, JAK3, KIAA1199, KLRK1, LCK, LCN2, LIMD2, LOC96610, LPAR5, LRG1, LSP1, LTB, LTF, LYZ, MAP4K1, MIR155HG, MMP7, MS4A1, MYB (includes EG:4602), NLRP7, NNMT, PHLDA2, PRF1, PRKCB, PSMB9, PTGDS, PTPN6, PTPRC, PTTG1, PYHIN1 (includes EG:149628), RASSF5, RGS1, RTN1, RUNX3, S100A8, SAA1, SECTM1, SELL, SERPINA3, SLC2A3, SLPI, STAT1, TARP, TCL1A, TDO2, TIMP1, TLR7, TNFRSF1B, TRAT1, TYROBP, UCP2, WARS, WFDC2, XAF1, XIST, ZAP70 | 144 |
| Cancer | hematologic cancer      | hematologic cancer      | 6,23E-13 | ADA, ALOX5, CCL3, CCL4, CD2, CD14, CD19, CD22, CD27, CD52, CD86, CD247, CD3D, CD3E, CD3G, CSF1R, CSF2RB, CSF3R, CXCL1, CXCL13, FGR, IKZF1, IL1B, IL2RB, IL2RG, IMPDH1, IRF4, ITGB2, JAK3, KLRK1, LCK, MS4A1, MYB (includes EG:4602), PRKCB, PTPN6, TLR7, ZAP70                                                                                                                                                                                                                                                                                                                                                                                                                                                                                                                                                                                                                                                                                                                                                                                                    | 37  |
| Cancer | lymphocytic leukemia    | lymphocytic leukemia    | 3,53E-12 | ADA, CCL3, CCL4, CD14, CD19, CD22, CD52, CD86, CD247, CD3D, CD3E, CD3G, CSF2RB, CXCL13, IKZF1, IL1B, IL2RB, IL2RG, IRF4, ITGB2, LCK, MS4A1, PRKCB, TLR7, ZAP70                                                                                                                                                                                                                                                                                                                                                                                                                                                                                                                                                                                                                                                                                                                                                                                                                                                                                                    | 25  |
| Cancer | leukemia                | leukemia                | 1,16E-11 | ADA, ALOX5, CCL3, CCL4, CD2, CD14, CD19, CD22, CD52, CD86, CD247, CD3D, CD3E, CD3G, CSF1R, CSF2RB, CSF3R, CXCL13, FGR, IKZF1, IL1B, IL2RB, IL2RG, IMPDH1, IRF4, ITGB2, JAK3, LCK, MS4A1, PRKCB, PTPN6, TLR7, ZAP70                                                                                                                                                                                                                                                                                                                                                                                                                                                                                                                                                                                                                                                                                                                                                                                                                                                | 33  |
| Cancer | melanoma                | melanoma                | 2,55E-10 | CASP1, CCL3, CCL4, CCL19, CCR7, CD2, CD163, CD3D, CD8A, CSF1R, CSF2RB, CXCL1, CXCL10, CXCL13, GBP2, GZMB, GZMK, IL1B, IL1RN, IL2RB, IL2RG, IRF1, LCK, MS4A1, TARP, TRAT1, ZAP70                                                                                                                                                                                                                                                                                                                                                                                                                                                                                                                                                                                                                                                                                                                                                                                                                                                                                   | 27  |
| Cancer | B-cell leukemia         | B-cell leukemia         | 7,38E-10 | ADA, CCL3, CCL4, CD19, CD22, CD52, CD86, CD3E, IL1B, IL2RB, IL2RG, ITGB2, LCK, MS4A1, PRKCB, TLR7, ZAP70                                                                                                                                                                                                                                                                                                                                                                                                                                                                                                                                                                                                                                                                                                                                                                                                                                                                                                                                                          | 17  |
| Cancer | malignant tumor         | malignant tumor         | 8,52E-09 | ADA, AIM2, C3, CARD16, CASP1, CCL2, CCL3, CCL4, CCL11, CCL19, CCR2, CCR5, CCR7, CD2, CD14, CD19, CD22, CD48, CD52, CD163, CD3D, CD8A, CLEC10A, CP, CSF1R, CSF2RB, CSF3R, CST7, CTSS, CXCL1, CXCL9, CXCL10, CXCL13, CXCR3, GABBR1, GBP2, GPR65, GZMB, GZMK, ICOS, IDO1, IFITM1, IKZF1, IL1B, IL1RN, IL2RB, IL2RG, IRF1, LCK, LCN2, LIMD2, LPAR5, LTB, LTF, LYZ, MAP4K1, MIR155HG, MMP7, MS4A1, NLRP7, NNMT, PRF1, PRKCB, PTGDS, PTPRC, PTTG1, PYHIN1 (includes EG:149628), RASSF5, RUNX3, S100A8, SAA1, SLPI, STAT1, TARP, TCL1A, TDO2, TIMP1, TLR7, TNFRSF1B, TRAT1, TYROBP, WFDC2, ZAP70                                                                                                                                                                                                                                                                                                                                                                                                                                                                         | 83  |
| Cancer | chronic B-cell leukemia | chronic B-cell leukemia | 8,59E-09 | ADA, CCL3, CCL4, CD22, CD52, CD86, IL1B, IL2RB, IL2RG, ITGB2, LCK, MS4A1, PRKCB, TLR7, ZAP70                                                                                                                                                                                                                                                                                                                                                                                                                                                                                                                                                                                                                                                                                                                                                                                                                                                                                                                                                                      | 15  |
| Cancer | tumor                   | tumor                   | 2,07E-08 | ADA, AIM2, C3, CARD16, CASP1, CCL2, CCL3, CCL4, CCL11, CCL19, CCL21, CCR2, CCR5, CCR7, CD2, CD4, CD14, CD19, CD22, CD28, CD48, CD52, CD86, CD163, CD3D, CD8A, CLEC10A, CP, CSF1R, CSF2RB, CSF3R, CST7, CTSS, CXCL1, CXCL9, CXCL10, CXCL13, CXCR3, CXCR6 (includes EG:10663), DARC, GABBR1, GBP2, GPR65, GZMB, GZMK, ICAM2, ICOS, IDO1, IFITM1, IGHG1, IKZF1, IL1B, IL1RN, IL27RA, IL2RB, IL2RG, IRF1, LCK, LCN2, LIMD2, LPAR5,                                                                                                                                                                                                                                                                                                                                                                                                                                                                                                                                                                                                                                    | 100 |



|                     |                   |                                    |          |                                                                                                                                                                                                                                                                                                   |    |
|---------------------|-------------------|------------------------------------|----------|---------------------------------------------------------------------------------------------------------------------------------------------------------------------------------------------------------------------------------------------------------------------------------------------------|----|
|                     |                   |                                    |          | LSP1, LTB, LTF, LYZ, MAP4K1, MIR155HG, MMP7, MS4A1, NLRP7, NNMT, PHLDA2, PRF1, PRKCB, PSMB9, PTGDS, PTPN6, PTPRC, PTTG1, PYHIN1 (includes EG:149628), RASSF5, RUNX3, S100A8, SAA1, SELL, SLPI, STAT1, TARP, TCL1A, TDO2, TIMP1, TLR7, TNFRSF1B, TNFSF13B, TRAT1, TYROBP, VAV1, WFDC2, XAF1, ZAP70 |    |
| Cell Morphology     | polarization      | polarization of blood cells        | 7,89E-15 | CCL5, CCL19, CCL21, CD28, CXCL9, CXCL10, ICOS, IL12RB1, IL1B, IL1RN, IRF4, ITGB2, LCK, LSP1, RASSF5, SLAMF1, STAT4, VAV1, WAS                                                                                                                                                                     | 19 |
| Cell Morphology     | polarization      | polarization of cells              | 2,44E-13 | CCL2, CCL5, CCL19, CCL21, CCR5, CD28, CXCL9, CXCL10, ICOS, IL12RB1, IL1B, IL1RN, IRF4, ITGB2, LCK, LSP1, RASSF5, SLAMF1, STAT4, VAV1, WAS                                                                                                                                                         | 21 |
| Cell Morphology     | polarization      | polarization of eukaryotic cells   | 8,34E-13 | CCL5, CCL19, CCL21, CCR5, CD28, CXCL9, CXCL10, ICOS, IL12RB1, IL1B, IL1RN, IRF4, ITGB2, LCK, LSP1, RASSF5, SLAMF1, STAT4, VAV1, WAS                                                                                                                                                               | 20 |
| Cell Morphology     | polarization      | polarization of leukocytes         | 9,47E-13 | CCL5, CCL19, CCL21, CD28, ICOS, IL12RB1, IL1B, IL1RN, IRF4, ITGB2, LCK, LSP1, RASSF5, SLAMF1, STAT4, VAV1, WAS                                                                                                                                                                                    | 17 |
| Cell Morphology     | polarization      | polarization of lymphocytes        | 3,76E-11 | CCL19, CCL21, CD28, ICOS, IL12RB1, IL1B, IRF4, ITGB2, LCK, RASSF5, SLAMF1, STAT4, VAV1, WAS                                                                                                                                                                                                       | 14 |
| Cell Morphology     | polarization      | polarization of T lymphocytes      | 1,08E-08 | CCL19, CD28, ICOS, IL12RB1, IL1B, IRF4, LCK, RASSF5, SLAMF1, STAT4, VAV1                                                                                                                                                                                                                          | 11 |
| Cell Morphology     | shape change      | shape change of leukocytes         | 3,95E-14 | CCL2, CCL3, CCL5, CCL11, CCR2, CD19, CD247, CD3E, CORO1A, DOCK2, FGR, HCK, ICOS, ITGAL, ITGB2, SELL, WAS                                                                                                                                                                                          | 17 |
| Cell Morphology     | shape change      | shape change of blood cells        | 8,84E-14 | CCL2, CCL3, CCL5, CCL11, CCR2, CD19, CD247, CD3E, CORO1A, DOCK2, FGR, GZMB, HCK, ICOS, ITGAL, ITGB2, SELL, WAS                                                                                                                                                                                    | 18 |
| Cell Morphology     | shape change      | shape change of granulocytes       | 1,09E-10 | CCL2, CCL3, CCL5, CCL11, CCR2, CORO1A, FGR, HCK, ITGB2, SELL                                                                                                                                                                                                                                      | 10 |
| Cell Morphology     | shape change      | shape change of normal cells       | 1,16E-07 | CCL2, CCL3, CCL5, CCL11, CCR2, CD19, CD247, CD3E, CORO1A, DOCK2, FGR, GZMB, HCK, ICOS, ITGAL, ITGB2, SELL, SERPINA3, WAS                                                                                                                                                                          | 19 |
| Cell Morphology     | cell spreading    | cell spreading of blood cells      | 6,64E-09 | CD19, CD247, CD3E, CORO1A, FGR, GZMB, HCK, ICOS, ITGAL, ITGB2, WAS                                                                                                                                                                                                                                | 11 |
| Cell Morphology     | cell spreading    | cell spreading of leukocytes       | 1,58E-08 | CD19, CD247, CD3E, CORO1A, FGR, HCK, ICOS, ITGAL, ITGB2, WAS                                                                                                                                                                                                                                      | 10 |
| Cellular Compromise | respiratory burst | respiratory burst                  | 1,81E-14 | C3, CCL2, CCL11, CD14, CXCL1, CYBB, FCER1G, FGR, FPR1, HCK, IGHA1, ITGAL, ITGAX, ITGB2, LTF, NCF1, PTPRC, TYROBP                                                                                                                                                                                  | 18 |
| Cellular Compromise | respiratory burst | respiratory burst of cells         | 5,61E-13 | C3, CCL2, CCL11, CD14, CXCL1, FCER1G, FGR, FPR1, HCK, IGHA1, ITGAL, ITGAX, ITGB2, PTPRC, TYROBP                                                                                                                                                                                                   | 15 |
| Cellular Compromise | respiratory burst | respiratory burst of myeloid cells | 3,65E-12 | C3, CCL11, CXCL1, FCER1G, FGR, FPR1, HCK, IGHA1, ITGAL, ITGAX, ITGB2, PTPRC, TYROBP                                                                                                                                                                                                               | 13 |
| Cellular Compromise | respiratory burst | respiratory burst of leukocytes    | 3,91E-12 | C3, CCL2, CCL11, CXCL1, FCER1G, FGR, FPR1, HCK, IGHA1, ITGAL, ITGAX, ITGB2, PTPRC, TYROBP                                                                                                                                                                                                         | 14 |
| Cellular Compromise | respiratory burst | respiratory burst of granulocytes  | 5,23E-11 | C3, CCL11, CXCL1, FCER1G, FGR, FPR1, HCK, IGHA1, ITGAL, ITGAX, ITGB2, TYROBP                                                                                                                                                                                                                      | 12 |
| Cellular Compromise | respiratory burst | respiratory burst of neutrophils   | 2,62E-10 | C3, CXCL1, FCER1G, FGR, FPR1, HCK, IGHA1, ITGAL, ITGAX, ITGB2, TYROBP                                                                                                                                                                                                                             | 11 |
| Cellular Compromise | degranulation     | degranulation of                   | 9,77E-11 | BTK, C3, C3AR1, CCL3, CCL4, CD300A, FCER1G, FCGR3B, FPR1, HCK, ITGB2, ITK, KLRK1, LAX1, LCP2, RAC2, SLA, TAC1, VAV1                                                                                                                                                                               | 19 |

|                          |               |                                                 |          |                                                                                                                                                                                                                                                                                |  |    |
|--------------------------|---------------|-------------------------------------------------|----------|--------------------------------------------------------------------------------------------------------------------------------------------------------------------------------------------------------------------------------------------------------------------------------|--|----|
| se                       |               | eukaryotic cells                                |          |                                                                                                                                                                                                                                                                                |  |    |
| Cellular Compromise      | degranulation | degranulation of mast cells                     | 8,80E-08 | BTK, C3, C3AR1, CD300A, FCER1G, HCK, ITK, LAX1, LCP2, RAC2, VAV1                                                                                                                                                                                                               |  | 11 |
| Cellular Compromise      | depletion     | depletion of mononuclear leukocytes             | 6,71E-09 | ADA, CCR2, CD4, CD27, EOMES, IL2RB, MS4A1, SELL, TNFRSF1B, TNFSF13B                                                                                                                                                                                                            |  | 10 |
| Cellular Compromise      | depletion     | depletion of cells                              | 1,71E-08 | ADA, CCR2, CD4, CD27, DENND2D, EOMES, IL2RB, MS4A1, SELL, TNFRSF1B, TNFSF13B                                                                                                                                                                                                   |  | 11 |
| Cellular Compromise      | depletion     | depletion of lymphocytes                        | 8,16E-08 | ADA, CD4, CD27, EOMES, IL2RB, MS4A1, SELL, TNFRSF1B, TNFSF13B                                                                                                                                                                                                                  |  | 9  |
| Gastrointestinal Disease | colitis       | colitis                                         | 2,94E-12 | ALOX5, CASP1, CCR2, CCR5, CD86, CD247, CD3D, CD3E, CD3G, CXCL10, EMR1, IGHM, IL1B, IL1RN, MMP7, MS4A1, NCF1, RUNX3, S100A8, STAT4, WAS                                                                                                                                         |  | 21 |
| Gastrointestinal Disease | damage        | damage of liver                                 | 7,85E-08 | C3, CASP1, CXCL1, CXCL10, FGR, HCK, IL1RN, IL27RA, ITGAL, ITGB2, NCF1, PRF1, STAT1, STAT4, TNFRSF1B                                                                                                                                                                            |  | 15 |
| Infection Mechanism      | infection     | infection by Hepatitis C virus                  | 3,58E-12 | CCL2, CCL3, CCL4, CCL5, CCL20, CXCL9, CXCL10, CXCL11, IMPDH1                                                                                                                                                                                                                   |  | 9  |
| Infection Mechanism      | infection     | infection by Reoviridae                         | 1,11E-09 | CCL2, CCL4, CCL5, CTSS, CXCL1, CXCL10                                                                                                                                                                                                                                          |  | 6  |
| Infection Mechanism      | infection     | infection by measles virus                      | 6,99E-09 | CCL2, CCL3, CCL4, CCL5, CXCL10                                                                                                                                                                                                                                                 |  | 5  |
| Infection Mechanism      | infection     | infection by Human cytomegalovirus              | 1,28E-08 | CCL2, CCL3, CCL4, CCL5, CXCL9, CXCL10                                                                                                                                                                                                                                          |  | 6  |
| Infection Mechanism      | infection     | infection by rotavirus                          | 4,11E-08 | CCL2, CCL4, CCL5, CXCL1, CXCL10                                                                                                                                                                                                                                                |  | 5  |
| Infection Mechanism      | infection     | infection by lymphocytic choriomeningitis virus | 5,94E-08 | CCL2, CCL3, CCL4, CCL5, CXCL10, ITGB2, XCL1                                                                                                                                                                                                                                    |  | 7  |
| Infection Mechanism      | replication   | replication of HIV                              | 1,62E-10 | APOBEC3G, CCL3, CCL4, CCL5, CCR5, CD4, CD28, CIITA, HCK, IGKC, IL16, IL1B, LCK, PTPRC, S100A8, TAC1                                                                                                                                                                            |  | 16 |
| Infection Mechanism      | replication   | replication of HIV-1                            | 1,29E-09 | APOBEC3G, CCL3, CCL4, CCL5, CCR5, CD4, CD28, CIITA, HCK, IGKC, IL1B, LCK, PTPRC, S100A8                                                                                                                                                                                        |  | 14 |
| Infection Mechanism      | replication   | replication of virus                            | 1,70E-08 | APBB1IP, APOBEC3G, CCL2, CCL3, CCL4, CCL5, CCR5, CD4, CD28, CD48, CIITA, CTSW, CXCL10, CXCR6 (includes EG:10663), FERMT3, HCK, IFITM1, IGKC, IL16, IL10RA, IL12RB1, IL1B, ISG20, LCK, MAN2B1, PIK3R5, PTPRC, RARRES3, S100A8, SELPLG, SLPI, STAT1, STAT4, TAC1                 |  | 34 |
| Infection Mechanism      | infectivity   | infectivity of virus                            | 5,16E-09 | APOBEC3G, APOC1, CCL2, CCL3, CCL4, CCL5, CCR5, CD4, CLEC10A, HCK, RARRES3                                                                                                                                                                                                      |  | 11 |
| Infection Mechanism      | infectivity   | infectivity of HIV-1                            | 3,11E-08 | APOBEC3G, CCL2, CCL3, CCL4, CCL5, CCR5, CD4, HCK                                                                                                                                                                                                                               |  | 8  |
| Organismal Survival      | survival      | survival of organism                            | 1,16E-11 | BCL2A1, C3, CCL2, CCL21, CCR2, CCR5, CD2, CD4, CD6, CD14, CD48, CNPY3, CXCL9, CXCL10, CXCL11, CXCR3, CYBB, IDO1, IGHM, IGK@, IKZF1, IL1B, IL1RN, IL7R, ITGAL, ITK, LY96, LYZ, MYB (includes EG:4602), NCF1, PRF1, PRKCB, PTPRC, STAT1, STAT4, TAP1, TNFRSF1B, UNC93B1, ZC3H12A |  | 39 |
| Organismal Survival      | survival      | survival of rodents                             | 3,62E-10 | BCL2A1, C3, CCL2, CCL21, CCR2, CCR5, CD2, CD4, CD6, CD14, CNPY3, CXCL9, CXCL10, CXCR3, CYBB, IDO1, IGHM, IGK@, IKZF1, IL1B, IL1RN, IL7R, ITGAL, ITK, LY96, NCF1, PRF1, PRKCB, PTPRC, STAT1, STAT4, TAP1, TNFRSF1B, UNC93B1, ZC3H12A                                            |  | 35 |
| Organismal Survival      | survival      | survival of                                     | 3,70E-10 | BCL2A1, C3, CCL2, CCL21, CCR2, CCR5, CD2, CD4, CD6, CD14, CNPY3, CXCL9,                                                                                                                                                                                                        |  | 36 |

|                                                                 |                        |                                                |          |                                                                                                                                                                                                                                                                                 |    |
|-----------------------------------------------------------------|------------------------|------------------------------------------------|----------|---------------------------------------------------------------------------------------------------------------------------------------------------------------------------------------------------------------------------------------------------------------------------------|----|
| I Survival                                                      |                        | mammalia                                       |          | CXCL10, CXCR3, CYBB, IDO1, IGHM, IGK@, IKZF1, IL1B, IL1RN, IL7R, ITGAL, ITK, LY96, MYB (includes EG:4602), NCF1, PRF1, PRKCB, PTPRC, STAT1, STAT4, TAP1, TNFRSF1B, UNC93B1, ZC3H12A                                                                                             |    |
| Organisma<br>I Survival                                         | survival               | survival of mice                               | 8,21E-10 | BCL2A1, C3, CCL2, CCL21, CCR2, CCR5, CD2, CD4, CD6, CD14, CNPY3, CXCL9, CXCL10, CXCR3, CYBB, IDO1, IGHM, IKZF1, IL1B, IL1RN, IL7R, ITGAL, ITK, LY96, NCF1, PRF1, PRKCB, PTPRC, STAT1, STAT4, TAP1, TNFRSF1B, UNC93B1, ZC3H12A                                                   | 34 |
| Antimicro<br>bial<br>Response                                   | antiviral<br>response  | antiviral<br>response                          | 3,96E-11 | APOBEC3G, CCL4, CCL5, CCL11, CCL19, CCR7, FGR, IRF1, IRF7, ISG20, LCN2, LILRB1, RARRES3, STAT1, TLR7, TLR8 (includes EG:51311), VAV1                                                                                                                                            | 17 |
| Antimicro<br>bial<br>Response                                   | antiviral<br>response  | antiviral<br>response of<br>organism           | 1,29E-09 | CCL4, CCL5, CCL11, CCL19, FGR, IRF7, ISG20, LCN2, LILRB1, RARRES3, STAT1, TLR7, TLR8 (includes EG:51311), VAV1                                                                                                                                                                  | 14 |
| Organisma<br>I Injury<br>and<br>Abnormali<br>ties               | damage                 | damage of<br>organ                             | 6,59E-11 | ALOX5, C2, C3, C1QA, CASP1, CCL2, CCR2, CCR5, CD4, CXCL1, CXCL10, CYBB, FGR, HCK, IL1B, IL1RN, IL27RA, ITGAL, ITGB2, NCF1, PRF1, SLPI, STAT1, STAT4, TAC1, TNFRSF1B                                                                                                             | 26 |
| Organisma<br>I Injury<br>and<br>Abnormali<br>ties               | damage                 | damage of<br>liver                             | 7,85E-08 | C3, CASP1, CXCL1, CXCL10, FGR, HCK, IL1RN, IL27RA, ITGAL, ITGB2, NCF1, PRF1, STAT1, STAT4, TNFRSF1B                                                                                                                                                                             | 15 |
| Organisma<br>I Injury<br>and<br>Abnormali<br>ties               | fibrosis               | fibrosis                                       | 3,39E-09 | ADA, ALOX5, C3, CCL2, CCR2, CCR5, CD4, CD19, CXCL6, CXCL9, CXCL10, CXCL11, CXCR3, HCK, IFITM1, IGHG1, IL1B, IL1RN, IMPDH1, IRF7, LCK, MMP7, NCF1, OAS2, PRKCB, PSMB9, STAT1, TIMP1, TNFRSF1B                                                                                    | 29 |
| Organisma<br>I Injury<br>and<br>Abnormali<br>ties               | injury                 | injury of<br>organ                             | 4,79E-08 | ALOX5, C2, CASP1, CCL2, CXCL1, CXCL10, CYBB, IL1RN, IL27RA, ITGAL, ITGB2, NCF1, SLPI, STAT1, STAT4, TAC1, TNFRSF1B                                                                                                                                                              | 17 |
| Reproduct<br>ive System<br>Disease                              | endometr<br>iosis      | endometri<br>osis                              | 8,49E-11 | CASP1, CCL2, CCL4, CCL18, CCL19, CCL21, CD163, CSF1R, CXCL9, CXCL10, CXCL13, CXCR6 (includes EG:10663), DARC, GZMA, HLA-DOB, IGL@, IL2RB, IL2RG, ISG20, ITGAL, KIAA1199, LTF, MMP7, PRKCB, PTPN22, PTTG1, S100A8, SLC2A3, SLPI, TNFRSF17, TNFRSF1B, TNFSF13B, WFDC2, XCL1, XCL2 | 35 |
| Renal and<br>Urological<br>Disease                              | nephritis              | nephritis                                      | 9,91E-10 | C1QA, CCL4, CCL5, CD2, CD19, CD28, CD1D, CD8A, HLA-DQB1, ICOS, IL16, IL1RN, IL27RA, ITGAL, MS4A1, PTPRC, SH2D2A, TNFSF13B                                                                                                                                                       | 18 |
| Renal and<br>Urological<br>Disease                              | glomerulo<br>nephritis | glomerulon<br>ephritis                         | 8,69E-09 | C1QA, CCL4, CCL5, CD2, CD19, CD28, CD1D, ICOS, IL16, IL1RN, IL27RA, ITGAL, MS4A1, PTPRC, SH2D2A, TNFSF13B                                                                                                                                                                       | 16 |
| Renal and<br>Urological<br>Disease                              | glomerulo<br>nephritis | glomerulon<br>ephritis of<br>organism          | 4,93E-08 | C1QA, CD2, CD28, CD1D, ICOS, IL16, IL1RN, IL27RA, ITGAL, PTPRC, SH2D2A                                                                                                                                                                                                          | 11 |
| Free<br>Radical<br>Scavengin<br>g                               | productio<br>n         | production<br>of reactive<br>oxygen<br>species | 1,30E-08 | ALOX5, CCL5, CCL11, CD14, CD28, CD52, CYBB, GZMA, GZMB, GZMK, IL1B, LCP2, NCF1, NCF1C, PRF1, PRKCB, RAC2, SELPLG, UCP2, ZAP70                                                                                                                                                   | 20 |
| Free<br>Radical<br>Scavengin<br>g                               | productio<br>n         | production<br>of<br>superoxide                 | 2,93E-08 | ALOX5, CXCL9, CYBB, FGR, FPR1, HCK, IL1B, ITGAX, ITGB2, LTF, NCF1, NCF1C, PRKCB, RAC2                                                                                                                                                                                           | 14 |
| Cardiovasc<br>ular<br>System<br>Developm<br>ent and<br>Function | adhesion               | adhesion of<br>endothelial<br>cells            | 4,78E-08 | AMICA1, C1QA, CCL2, CCL3, CCL4, CCL5, ICAM2, IL1B, ITGAL, ITGAX, ITGB2, SELL, SELPLG                                                                                                                                                                                            | 13 |
| Hepatic<br>System<br>Disease                                    | damage                 | damage of<br>liver                             | 7,85E-08 | C3, CASP1, CXCL1, CXCL10, FGR, HCK, IL1RN, IL27RA, ITGAL, ITGB2, NCF1, PRF1, STAT1, STAT4, TNFRSF1B                                                                                                                                                                             | 15 |
| Organ<br>Developm<br>ent                                        | developm<br>ent        | developmen<br>t of lymph                       | 9,31E-08 | CCL19, CCL21, CCR7, CXCL13, IKZF1, IL7R, JAK3, LTB                                                                                                                                                                                                                              | 8  |

ent

node

**SUPPLEMENTAL TABLE 4**

© 2000-2010 Ingenuity Systems, Inc. All rights reserved.

**92 probeset list enrichment analysis (biological functions)**

| Category                          | Function          | Function Annotation                         | p-value  | Molecules                                                                              | # Molecules |
|-----------------------------------|-------------------|---------------------------------------------|----------|----------------------------------------------------------------------------------------|-------------|
| Cellular Function and Maintenance | homeostasis       | homeostasis of leukocytes                   | 2,03E-08 | CCL19, CD86, CD3E, DEF6, GZMB, IGHM, LGALS2, NCAPH2, PSMB9, RASSF5, SIVA1, SST, TYROBP | 13          |
| Cellular Function and Maintenance | homeostasis       | homeostasis of plasmacytoid dendritic cells | 3,09E-03 | TYROBP                                                                                 | 1           |
| Cellular Function and Maintenance | homeostasis       | homeostasis of naive T lymphocytes          | 6,17E-03 | CCL19                                                                                  | 1           |
| Cellular Function and Maintenance | development       | T cell development                          | 1,29E-07 | CCL19, CD86, CD3E, DEF6, GZMB, IGHM, LGALS2, NCAPH2, PSMB9, RASSF5, SIVA1, SST         | 12          |
| Cellular Function and Maintenance | cell death        | cell death of T lymphocytes                 | 1,21E-05 | CCL19, CD3E, DEF6, GZMB, IGHM, LGALS2, SIVA1                                           | 7           |
| Cellular Function and Maintenance | cell death        | cell death of Th2 cells                     | 2,14E-02 | GZMB                                                                                   | 1           |
| Cellular Function and Maintenance | cell death        | cell death of naive T lymphocytes           | 4,24E-02 | CCL19                                                                                  | 1           |
| Cellular Function and Maintenance | differentiation   | differentiation of T lymphocytes            | 2,57E-04 | CCL19, CD86, CD3E, DEF6, NCAPH2, RASSF5                                                | 6           |
| Cellular Function and Maintenance | differentiation   | differentiation of naive T lymphocytes      | 5,51E-03 | CD86, DEF6                                                                             | 2           |
| Cellular Function and Maintenance | differentiation   | differentiation of thymocytes               | 8,50E-03 | CD86, CD3E                                                                             | 2           |
| Cellular Function and Maintenance | differentiation   | differentiation of effector T lymphocytes   | 3,35E-02 | DEF6                                                                                   | 1           |
| Cellular Function and Maintenance | generation        | generation of cytotoxic T cells             | 3,32E-04 | CD86, PSMB9                                                                            | 2           |
| Cellular Function and Maintenance | polymerization    | polymerization of actin cytoskeleton        | 3,09E-03 | CD3E                                                                                   | 1           |
| Cellular Function and Maintenance | apoptosis         | apoptosis of T lymphocytes                  | 4,51E-03 | CD3E, GZMB, LGALS2, SIVA1                                                              | 4           |
| Cellular Function and Maintenance | apoptosis         | apoptosis of cytotoxic T cells              | 3,05E-02 | GZMB                                                                                   | 1           |
| Cellular Function and Maintenance | apoptosis         | apoptosis of thymocytes                     | 3,48E-02 | CD3E, GZMB                                                                             | 2           |
| Cellular Function and Maintenance | respiratory burst | respiratory burst of neutrophils            | 5,21E-03 | IGHA1, TYROBP                                                                          | 2           |
| Cellular Function and Maintenance | co-localization   | co-localization of T lymphocytes            | 6,17E-03 | CCL19                                                                                  | 1           |
| Cellular Function and Maintenance | co-localization   | co-localization of antigen presenting cells | 6,17E-03 | CCL19                                                                                  | 1           |
| Cellular Function and Maintenance | turnover          | turnover of epithelial cells                | 9,24E-03 | IGHM                                                                                   | 1           |
| Cellular Function and Maintenance | polarization      | polarization of T lymphocytes               | 9,63E-03 | CCL19, RASSF5                                                                          | 2           |
| Cellular Function and Maintenance | polarization      | polarization of naive T lymphocytes         | 3,05E-02 | CCL19                                                                                  | 1           |
| Cellular Function and Maintenance | proliferation     | proliferation of thymocytes                 | 2,08E-02 | CD3E, SST                                                                              | 2           |
| Cellular Function and Maintenance | function          | function of natural killer cells            | 3,05E-02 | CD86                                                                                   | 1           |
| Cellular Function and Maintenance | organization      | organization of actin stress fibers         | 3,95E-02 | ARHGAP4                                                                                | 1           |
| Cellular Function and Maintenance | phagocytosis      | phagocytosis of leukemia cell lines         | 4,54E-02 | DEF6                                                                                   | 1           |
| Cell-mediated Immune Response     | development       | T cell development                          | 1,29E-07 | CCL19, CD86, CD3E, DEF6, GZMB, IGHM, LGALS2, NCAPH2, PSMB9, RASSF5, SIVA1, SST         | 12          |
| Cell-mediated Immune Response     | cell death        | cell death of T lymphocytes                 | 1,21E-05 | CCL19, CD3E, DEF6, GZMB, IGHM, LGALS2, SIVA1                                           | 7           |

|                 |                     |                               |          |                                  |    |
|-----------------|---------------------|-------------------------------|----------|----------------------------------|----|
| Cell-mediated   |                     |                               |          |                                  |    |
| Immune Response | cell death          | cell death of Th2 cells       | 2,14E-02 | GZMB                             | 1  |
| Cell-mediated   |                     | cell death of naive T         |          |                                  |    |
| Immune Response | cell death          | lymphocytes                   | 4,24E-02 | CCL19                            | 1  |
| Cell-mediated   |                     | differentiation of T          |          | CCL19, CD86, CD3E, DEF6, NCAPH2, |    |
| Immune Response | differentiation     | lymphocytes                   | 2,57E-04 | RASSF5                           | 6  |
| Cell-mediated   |                     | differentiation of naive T    |          |                                  |    |
| Immune Response | differentiation     | lymphocytes                   | 5,51E-03 | CD86, DEF6                       | 2  |
| Cell-mediated   |                     | differentiation of            |          |                                  |    |
| Immune Response | differentiation     | thymocytes                    | 8,50E-03 | CD86, CD3E                       | 2  |
| Cell-mediated   |                     | differentiation of effector T |          |                                  |    |
| Immune Response | differentiation     | lymphocytes                   | 3,35E-02 | DEF6                             | 1  |
| Cell-mediated   |                     | generation of cytotoxic T     |          |                                  |    |
| Immune Response | generation          | cells                         | 3,32E-04 | CD86, PSMB9                      | 2  |
| Cell-mediated   |                     |                               |          |                                  |    |
| Immune Response | adhesion            | adhesion of T lymphocytes     | 1,92E-03 | CCL19, RASSF5, TAC1              | 3  |
| Cell-mediated   |                     |                               |          |                                  |    |
| Immune Response | migration           | T cell migration              | 2,98E-03 | CCL19, CD86, SST, TNFRSF14       | 4  |
| Cell-mediated   |                     |                               |          |                                  |    |
| Immune Response | migration           | migration of thymocytes       | 4,54E-02 | SST                              | 1  |
| Cell-mediated   |                     |                               |          |                                  |    |
| Immune Response | apoptosis           | apoptosis of T lymphocytes    | 4,51E-03 | CD3E, GZMB, LGALS2, SIVA1        | 4  |
| Cell-mediated   |                     | apoptosis of cytotoxic T      |          |                                  |    |
| Immune Response | apoptosis           | cells                         | 3,05E-02 | GZMB                             | 1  |
| Cell-mediated   |                     |                               |          |                                  |    |
| Immune Response | apoptosis           | apoptosis of thymocytes       | 3,48E-02 | CD3E, GZMB                       | 2  |
| Cell-mediated   |                     | Th2 immune response of        |          |                                  |    |
| Immune Response | Th2 immune response | natural killer T lymphocytes  | 6,17E-03 | CD86                             | 1  |
| Cell-mediated   |                     | homeostasis of naive T        |          |                                  |    |
| Immune Response | homeostasis         | lymphocytes                   | 6,17E-03 | CCL19                            | 1  |
| Cell-mediated   |                     | polarization of T             |          |                                  |    |
| Immune Response | polarization        | lymphocytes                   | 9,63E-03 | CCL19, RASSF5                    | 2  |
| Cell-mediated   |                     | polarization of naive T       |          |                                  |    |
| Immune Response | polarization        | lymphocytes                   | 3,05E-02 | CCL19                            | 1  |
| Cell-mediated   |                     | cell movement of T            |          |                                  |    |
| Immune Response | cell movement       | lymphocytes                   | 1,13E-02 | CCL19, CD86, TNFRSF14            | 3  |
| Cell-mediated   |                     | infiltration by T             |          |                                  |    |
| Immune Response | infiltration        | lymphocytes                   | 1,38E-02 | CCL19, CD86                      | 2  |
| Cell-mediated   |                     | chemotaxis of naive T         |          |                                  |    |
| Immune Response | chemotaxis          | lymphocytes                   | 1,54E-02 | CCL19                            | 1  |
| Cell-mediated   |                     | chemotaxis of T               |          |                                  |    |
| Immune Response | chemotaxis          | lymphocytes                   | 2,42E-02 | CCL19, TNFRSF14                  | 2  |
| Cell-mediated   |                     |                               |          |                                  |    |
| Immune Response | chemotaxis          | chemotaxis of thymocytes      | 2,75E-02 | CCL19                            | 1  |
| Cell-mediated   |                     | chemotaxis of memory T        |          |                                  |    |
| Immune Response | chemotaxis          | lymphocytes                   | 3,95E-02 | CCL19                            | 1  |
| Cell-mediated   |                     |                               |          |                                  |    |
| Immune Response | invasion            | invasion of T lymphocytes     | 1,54E-02 | SERP1                            | 1  |
| Cell-mediated   |                     | cell spreading of T           |          |                                  |    |
| Immune Response | cell spreading      | lymphocytes                   | 1,84E-02 | CD3E                             | 1  |
| Cell-mediated   |                     |                               |          |                                  |    |
| Immune Response | proliferation       | proliferation of thymocytes   | 2,08E-02 | CD3E, SST                        | 2  |
| Cell-mediated   |                     |                               |          |                                  |    |
| Immune Response | frequency           | frequency of T lymphocytes    | 2,45E-02 | CCL19                            | 1  |
| Cell-mediated   |                     | formation of                  |          |                                  |    |
| Immune Response | formation           | immunological synapses        | 3,95E-02 | DEF6                             | 1  |
| Cell-mediated   |                     |                               |          |                                  |    |
| Immune Response | anergy              | anergy of T lymphocytes       | 4,24E-02 | CD86                             | 1  |
| Cellular        |                     |                               |          | CCL19, CD86, CD3E, DEF6, GZMB,   |    |
| Development     | development         | T cell development            | 1,29E-07 | IGHM, LGALS2, NCAPH2, PSMB9,     | 12 |
| Cellular        |                     |                               |          | RASSF5, SIVA1, SST               |    |
| Development     | development         | development of cells          | 3,27E-04 | CCL19, CD86, CD3E, DEF6, GZMB,   | 13 |
| Cellular        | development         | arrest in development of      | 3,09E-03 | IGHM, LGALS2, NCAPH2, PSMB9,     | 1  |
|                 |                     |                               |          | RASSF5, SIVA1, SST, TYROBP       |    |

|                      |                       |                                            |          |                                                                                                 |    |
|----------------------|-----------------------|--------------------------------------------|----------|-------------------------------------------------------------------------------------------------|----|
| Development          |                       | oligodendrocytes                           |          | CCL19, CD86, CD3E, DEF6, GZMB, IGHM, LGALS2, NCAPH2, PSMB9, RARRES3, RASSF5, SIVA1, SST, TYROBP | 14 |
| Cellular Development | developmental process | developmental process of leukocytes        | 1,66E-07 |                                                                                                 |    |
| Cellular Development | developmental process | developmental process of thymocytes        | 4,98E-03 | CD86, CD3E, SST                                                                                 | 3  |
| Cellular Development | cell death            | cell death of T lymphocytes                | 1,21E-05 | CCL19, CD3E, DEF6, GZMB, IGHM, LGALS2, SIVA1                                                    | 7  |
| Cellular Development | cell death            | cell death of Th2 cells                    | 2,14E-02 | GZMB                                                                                            | 1  |
| Cellular Development | cell death            | cell death of naive T lymphocytes          | 4,24E-02 | CCL19                                                                                           | 1  |
| Cellular Development | maturation            | maturation of leukocytes                   | 2,38E-05 | CCL19, CD86, IGHM, RARRES3, SST, TYROBP                                                         | 6  |
| Cellular Development | maturation            | maturation of dendritic cells              | 2,77E-03 | CCL19, RARRES3, TYROBP                                                                          | 3  |
| Cellular Development | maturation            | maturation of lymphocytes                  | 3,52E-03 | CD86, IGHM, SST                                                                                 | 3  |
| Cellular Development | maturation            | maturation of pro-B lymphocytes            | 9,24E-03 | IGHM                                                                                            | 1  |
| Cellular Development | maturation            | maturation of osteoclasts                  | 2,75E-02 | TYROBP                                                                                          | 1  |
| Cellular Development | maturation            | maturation of thymocytes                   | 4,54E-02 | SST                                                                                             | 1  |
| Cellular Development | differentiation       | differentiation of lymphocytes             | 1,59E-04 | CCL19, CD86, CD3E, DEF6, IGHM, NCAPH2, RASSF5                                                   | 7  |
| Cellular Development | differentiation       | differentiation of T lymphocytes           | 2,57E-04 | CCL19, CD86, CD3E, DEF6, NCAPH2, RASSF5                                                         | 6  |
| Cellular Development | differentiation       | differentiation of thymoma cell lines      | 3,09E-03 | CD3E                                                                                            | 1  |
| Cellular Development | differentiation       | differentiation of cells                   | 3,26E-03 | CCL19, CD86, CD3E, DEF6, GZMB, IGHM, NCAPH2, PTGDS, RARRES3, RASSF5, STRA13, TYROBP             | 12 |
| Cellular Development | differentiation       | differentiation of naive T lymphocytes     | 5,51E-03 | CD86, DEF6                                                                                      | 2  |
| Cellular Development | differentiation       | differentiation of thymocytes              | 8,50E-03 | CD86, CD3E                                                                                      | 2  |
| Cellular Development | differentiation       | differentiation of effector T lymphocytes  | 3,35E-02 | DEF6                                                                                            | 1  |
| Cellular Development | generation            | generation of cytotoxic T cells            | 3,32E-04 | CD86, PSMB9                                                                                     | 2  |
| Cellular Development | expansion             | expansion of T lymphocytes                 | 2,95E-03 | CD86, CD3E, IGHM                                                                                | 3  |
| Cellular Development | expansion             | expansion of splenocytes                   | 1,23E-02 | CD3E                                                                                            | 1  |
| Cellular Development | expansion             | expansion of cytotoxic T cells             | 1,54E-02 | IGHM                                                                                            | 1  |
| Cellular Development | growth                | arrest in growth of B cell lymphoma cells  | 3,09E-03 | IGHM                                                                                            | 1  |
| Cellular Development | growth                | arrest in growth of lung cancer cell lines | 2,45E-02 | RASSF5                                                                                          | 1  |
| Cellular Development | growth                | arrest in growth of carcinoma cell lines   | 3,35E-02 | RASSF5                                                                                          | 1  |
| Cellular Development | growth                | arrest in growth of tumor cell lines       | 3,48E-02 | IGHM, RASSF5                                                                                    | 2  |
| Cellular Development | growth                | arrest in growth of lymphoma cell lines    | 4,24E-02 | IGHM                                                                                            | 1  |
| Cellular Development | apoptosis             | apoptosis of T lymphocytes                 | 4,51E-03 | CD3E, GZMB, LGALS2, SIVA1                                                                       | 4  |
| Cellular Development | apoptosis             | apoptosis of cytotoxic T cells             | 3,05E-02 | GZMB                                                                                            | 1  |
| Cellular Development | apoptosis             | apoptosis of thymocytes                    | 3,48E-02 | CD3E, GZMB                                                                                      | 2  |

|                                               |                       |                                           |          |                                                                                      |    |
|-----------------------------------------------|-----------------------|-------------------------------------------|----------|--------------------------------------------------------------------------------------|----|
| Cellular Development                          | cell spreading        | cell spreading of blood cells             | 8,87E-03 | CD3E, GZMB                                                                           | 2  |
| Cellular Development                          | cell spreading        | cell spreading of T lymphocytes           | 1,84E-02 | CD3E                                                                                 | 1  |
| Cellular Development                          | cell spreading        | cell spreading of blood platelets         | 3,35E-02 | GZMB                                                                                 | 1  |
| Cellular Development                          | regeneration          | regeneration of myeloid cells             | 9,24E-03 | TYROBP                                                                               | 1  |
| Cellular Development                          | polarization          | polarization of T lymphocytes             | 9,63E-03 | CCL19, RASSF5                                                                        | 2  |
| Cellular Development                          | polarization          | polarization of naive T lymphocytes       | 3,05E-02 | CCL19                                                                                | 1  |
| Cellular Development                          | neurogenesis          | neurogenesis of neuronal progenitor cells | 1,23E-02 | GZMB                                                                                 | 1  |
| Cellular Development                          | proliferation         | proliferation of thymocytes               | 2,08E-02 | CD3E, SST                                                                            | 2  |
| Hematological System Development and Function | development           | T cell development                        | 1,29E-07 | CCL19, CD86, CD3E, DEF6, GZMB, IGHM, LGALS2, NCAPH2, PSMB9, RASSF5, SIVA1, SST       | 12 |
| Hematological System Development and Function | hematological process | hematological process                     | 4,02E-06 | CCL19, CD86, CD3E, DEF6, GZMB, IGHM, LGALS2, NCAPH2, PSMB9, RASSF5, SIVA1, SST, TAC1 | 13 |
| Hematological System Development and Function | binding               | binding of lymphocytes                    | 6,51E-06 | CCL19, CD86, CD3E, SST, TAC1                                                         | 5  |
| Hematological System Development and Function | binding               | binding of T lymphocytes                  | 1,06E-03 | CD86, SST, TAC1                                                                      | 3  |
| Hematological System Development and Function | binding               | binding of lymphoblasts                   | 9,24E-03 | CD3E                                                                                 | 1  |
| Hematological System Development and Function | binding               | binding of memory T lymphocytes           | 1,23E-02 | CD86                                                                                 | 1  |
| Hematological System Development and Function | binding               | binding of B lymphocytes                  | 4,83E-02 | CD86                                                                                 | 1  |
| Hematological System Development and Function | cell death            | cell death of T lymphocytes               | 1,21E-05 | CCL19, CD3E, DEF6, GZMB, IGHM, LGALS2, SIVA1                                         | 7  |
| Hematological System Development and Function | cell death            | cell death of Th2 cells                   | 2,14E-02 | GZMB                                                                                 | 1  |
| Hematological System Development and Function | cell death            | cell death of naive T lymphocytes         | 4,24E-02 | CCL19                                                                                | 1  |
| Hematological System Development and Function | proliferation         | proliferation of leukocytes               | 1,81E-05 | CD86, CD3E, DEF6, IGHM, IGKC, LST1, SST, TAC1, TNFRSF14, TYROBP                      | 10 |
| Hematological System Development and Function | proliferation         | proliferation of lymphocytes              | 7,37E-05 | CD86, CD3E, DEF6, IGHM, IGKC, LST1, SST, TAC1, TNFRSF14                              | 9  |
| Hematological System Development and Function | proliferation         | proliferation of alpha-beta               | 1,09E-03 | CD3E, TNFRSF14                                                                       | 2  |



|                          |               |                                                          |          |                                                          |   |
|--------------------------|---------------|----------------------------------------------------------|----------|----------------------------------------------------------|---|
| System                   |               | T lymphocytes                                            |          |                                                          |   |
| Development and Function |               |                                                          |          |                                                          |   |
| Hematological System     |               |                                                          |          |                                                          |   |
| Development and Function | proliferation | proliferation of T lymphocytes                           | 3,21E-03 | CD86, CD3E, DEF6, IGHM, SST, TNFRSF14                    | 6 |
| Hematological System     |               |                                                          |          |                                                          |   |
| Development and Function | proliferation | proliferation of naive T lymphocytes                     | 3,60E-03 | CD3E, DEF6                                               | 2 |
| Hematological System     |               |                                                          |          |                                                          |   |
| Development and Function | proliferation | proliferation of B lymphocytes                           | 3,63E-03 | CD86, CD3E, IGHM, IGKC                                   | 4 |
| Hematological System     |               |                                                          |          |                                                          |   |
| Development and Function | proliferation | proliferation of long-term culture-initiating cells      | 6,17E-03 | TAC1                                                     | 1 |
| Hematological System     |               |                                                          |          |                                                          |   |
| Development and Function | proliferation | proliferation of peripheral blood mononuclear leukocytes | 6,17E-03 | LST1                                                     | 1 |
| Hematological System     |               |                                                          |          |                                                          |   |
| Development and Function | proliferation | proliferation of colony-forming granulocyte-macrophages  | 1,23E-02 | TAC1                                                     | 1 |
| Hematological System     |               |                                                          |          |                                                          |   |
| Development and Function | proliferation | proliferation of bone marrow-derived macrophages         | 1,84E-02 | TYROBP                                                   | 1 |
| Hematological System     |               |                                                          |          |                                                          |   |
| Development and Function | proliferation | proliferation of thymocytes                              | 2,08E-02 | CD3E, SST                                                | 2 |
| Hematological System     |               |                                                          |          |                                                          |   |
| Development and Function | proliferation | proliferation of hematopoietic progenitor cells          | 2,30E-02 | CD3E, TAC1                                               | 2 |
| Hematological System     |               |                                                          |          |                                                          |   |
| Development and Function | proliferation | proliferation of lymphoblasts                            | 2,75E-02 | CD3E                                                     | 1 |
| Hematological System     |               |                                                          |          |                                                          |   |
| Development and Function | proliferation | proliferation of pro-B lymphocytes                       | 4,24E-02 | IGHM                                                     | 1 |
| Hematological System     |               |                                                          |          |                                                          |   |
| Development and Function | quantity      | quantity of lymphocytes                                  | 3,17E-05 | CCL19, CD86, CD3E, DEF6, IGHM, IGKC, SST, TYROBP         | 8 |
| Hematological System     |               |                                                          |          |                                                          |   |
| Development and Function | quantity      | quantity of blood cells                                  | 9,97E-05 | CCL19, CD86, CD3E, DEF6, IGHM, IGKC, SST, STRA13, TYROBP | 9 |
| Hematological System     |               |                                                          |          |                                                          |   |
| Development and Function | quantity      | quantity of T lymphocytes                                | 1,71E-03 | CCL19, CD86, CD3E, DEF6, SST                             | 5 |
| Hematological System     |               |                                                          |          |                                                          |   |
| Development and Function | quantity      | quantity of thymocytes                                   | 3,73E-03 | CD86, CD3E, SST                                          | 3 |
| Hematological System     |               |                                                          |          |                                                          |   |
| Development and Function | quantity      | quantity of pre-B lymphocytes                            | 5,51E-03 | IGHM, IGKC                                               | 2 |

|                                                  |            |                                          |          |                                                        |   |
|--------------------------------------------------|------------|------------------------------------------|----------|--------------------------------------------------------|---|
| Development and Function<br>Hematological System |            |                                          |          |                                                        |   |
| Development and Function<br>Hematological System | quantity   | quantity of suppressor T lymphocytes     | 6,17E-03 | CD86                                                   | 1 |
| Development and Function<br>Hematological System | quantity   | quantity of natural killer cells         | 7,44E-03 | CD86, TYROBP                                           | 2 |
| Development and Function<br>Hematological System | quantity   | quantity of pre-B1 lymphocytes           | 1,23E-02 | IGHM                                                   | 1 |
| Development and Function<br>Hematological System | quantity   | quantity of dendritic cells              | 1,25E-02 | CCL19, TYROBP                                          | 2 |
| Development and Function<br>Hematological System | quantity   | quantity of pre-B2 lymphocytes           | 1,54E-02 | IGHM                                                   | 1 |
| Development and Function<br>Hematological System | quantity   | quantity of myeloid dendritic cells      | 2,14E-02 | CCL19                                                  | 1 |
| Development and Function<br>Hematological System | quantity   | quantity of pre-T lymphocytes            | 2,45E-02 | CD3E                                                   | 1 |
| Development and Function<br>Hematological System | quantity   | quantity of plasmacytoid dendritic cells | 3,35E-02 | TYROBP                                                 | 1 |
| Development and Function<br>Hematological System | quantity   | quantity of mononuclear cells            | 3,65E-02 | STRA13                                                 | 1 |
| Development and Function<br>Hematological System | activation | activation of leukocytes                 | 3,74E-05 | CD86, CD3E, DEF6, GZMB, IGHM, PSMB9, SST, TAC1, TYROBP | 9 |
| Development and Function<br>Hematological System | activation | activation of lymphocytes                | 1,31E-04 | CD86, CD3E, DEF6, GZMB, IGHM, TAC1, TYROBP             | 7 |
| Development and Function<br>Hematological System | activation | activation of T lymphocytes              | 1,97E-04 | CD86, CD3E, DEF6, GZMB, TAC1, TYROBP                   | 6 |
| Development and Function<br>Hematological System | activation | activation of cytotoxic T cells          | 3,13E-04 | CD86, GZMB, TAC1                                       | 3 |
| Development and Function<br>Hematological System | activation | activation of naive T lymphocytes        | 6,05E-04 | CD86, DEF6                                             | 2 |
| Development and Function<br>Hematological System | activation | activation of antigen presenting cells   | 2,23E-03 | CD86, IGHM, PSMB9, TAC1                                | 4 |
| Development and Function<br>Hematological System | activation | activation of effector lymphocytes       | 2,45E-02 | DEF6                                                   | 1 |

| Function                                      |                 |                                           |          |                                               |   |
|-----------------------------------------------|-----------------|-------------------------------------------|----------|-----------------------------------------------|---|
| Hematological System Development and Function | activation      | activation of thymocytes                  | 3,05E-02 | CD3E                                          | 1 |
| Hematological System Development and Function | activation      | activation of B lymphocytes               | 3,28E-02 | CD86, IGHM                                    | 2 |
| Hematological System Development and Function | activation      | activation of natural killer cells        | 3,82E-02 | TAC1, TYROBP                                  | 2 |
| Hematological System Development and Function | differentiation | differentiation of lymphocytes            | 1,59E-04 | CCL19, CD86, CD3E, DEF6, IGHM, NCAPH2, RASSF5 | 7 |
| Hematological System Development and Function | differentiation | differentiation of T lymphocytes          | 2,57E-04 | CCL19, CD86, CD3E, DEF6, NCAPH2, RASSF5       | 6 |
| Hematological System Development and Function | differentiation | differentiation of naive T lymphocytes    | 5,51E-03 | CD86, DEF6                                    | 2 |
| Hematological System Development and Function | differentiation | differentiation of thymocytes             | 8,50E-03 | CD86, CD3E                                    | 2 |
| Hematological System Development and Function | differentiation | differentiation of effector T lymphocytes | 3,35E-02 | DEF6                                          | 1 |
| Hematological System Development and Function | response        | response of lymphocytes                   | 2,33E-04 | CCL19, CD86, CD3E, GZMB                       | 4 |
| Hematological System Development and Function | response        | response of B lymphocytes                 | 6,05E-04 | CCL19, GZMB                                   | 2 |
| Hematological System Development and Function | response        | T cell response                           | 2,29E-03 | CCL19, CD86, CD3E                             | 3 |
| Hematological System Development and Function | response        | response of peripheral blood leukocytes   | 9,24E-03 | CCL19                                         | 1 |
| Hematological System Development and Function | generation      | generation of cytotoxic T cells           | 3,32E-04 | CD86, PSMB9                                   | 2 |
| Hematological System Development and Function | infiltration    | infiltration by dendritic cells           | 4,14E-04 | CCL19, CD86                                   | 2 |
| Hematological System Development and Function | infiltration    | infiltration by T lymphocytes             | 1,38E-02 | CCL19, CD86                                   | 2 |
| Hematological System Development and Function | extravasation   | extravasation of plasma                   | 7,13E-04 | SST, TAC1                                     | 2 |

|                                               |               |                                                |          |                             |   |
|-----------------------------------------------|---------------|------------------------------------------------|----------|-----------------------------|---|
| Hematological System Development and Function | cell movement | cell movement of dendritic cells               | 1,06E-03 | CCL19, CD86, TAC1           | 3 |
| Hematological System Development and Function | cell movement | cell movement of lymphocytes                   | 5,05E-03 | CCL19, CD86, TAC1, TNFRSF14 | 4 |
| Hematological System Development and Function | cell movement | cell movement of T lymphocytes                 | 1,13E-02 | CCL19, CD86, TNFRSF14       | 3 |
| Hematological System Development and Function | adhesion      | adhesion of T lymphocytes                      | 1,92E-03 | CCL19, RASSF5, TAC1         | 3 |
| Hematological System Development and Function | adhesion      | adhesion of blood platelets                    | 8,14E-03 | GZMB, IGHM                  | 2 |
| Hematological System Development and Function | accumulation  | accumulation of mononuclear leukocytes         | 1,99E-03 | CD86, DEF6, PTGDS           | 3 |
| Hematological System Development and Function | accumulation  | accumulation of effector memory T lymphocytes  | 3,09E-03 | DEF6                        | 1 |
| Hematological System Development and Function | accumulation  | accumulation of T lymphocytes                  | 1,21E-02 | CD86, DEF6                  | 2 |
| Hematological System Development and Function | accumulation  | accumulation of monocytes                      | 2,75E-02 | PTGDS                       | 1 |
| Hematological System Development and Function | expansion     | expansion of T lymphocytes                     | 2,95E-03 | CD86, CD3E, IGHM            | 3 |
| Hematological System Development and Function | expansion     | expansion of cytotoxic T cells                 | 1,54E-02 | IGHM                        | 1 |
| Hematological System Development and Function | chemotaxis    | chemotaxis of CD34+ cells                      | 3,09E-03 | CCL19                       | 1 |
| Hematological System Development and Function | chemotaxis    | chemotaxis of lymphocytes                      | 5,10E-03 | CCL19, TAC1, TNFRSF14       | 3 |
| Hematological System Development and Function | chemotaxis    | chemotaxis of memory B cells                   | 1,23E-02 | CCL19                       | 1 |
| Hematological System Development and Function | chemotaxis    | chemotaxis of dendritic cells                  | 1,25E-02 | CCL19, TAC1                 | 2 |
| Hematological System Development and Function | chemotaxis    | chemotaxis of monocyte-derived dendritic cells | 1,54E-02 | CCL19                       | 1 |
| Hematological System Development and Function | chemotaxis    | chemotaxis of naive T                          | 1,54E-02 | CCL19                       | 1 |

|                                                                  |                 |                                                |          |                           |   |
|------------------------------------------------------------------|-----------------|------------------------------------------------|----------|---------------------------|---|
| System<br>Development and<br>Function<br>Hematological<br>System |                 | lymphocytes                                    |          |                           |   |
| Development and<br>Function<br>Hematological<br>System           | chemotaxis      | chemotaxis of T<br>lymphocytes                 | 2,42E-02 | CCL19, TNFRSF14           | 2 |
| Development and<br>Function<br>Hematological<br>System           | chemotaxis      | chemotaxis of thymocytes                       | 2,75E-02 | CCL19                     | 1 |
| Development and<br>Function<br>Hematological<br>System           | chemotaxis      | chemotaxis of memory T<br>lymphocytes          | 3,95E-02 | CCL19                     | 1 |
| Development and<br>Function<br>Hematological<br>System           | modulation      | modulation of Kupffer cells                    | 3,09E-03 | SST                       | 1 |
| Development and<br>Function<br>Hematological<br>System           | maturation      | maturation of lymphocytes                      | 3,52E-03 | CD86, IGHM, SST           | 3 |
| Development and<br>Function<br>Hematological<br>System           | maturation      | maturation of pro-B<br>lymphocytes             | 9,24E-03 | IGHM                      | 1 |
| Development and<br>Function<br>Hematological<br>System           | maturation      | maturation of thymocytes                       | 4,54E-02 | SST                       | 1 |
| Development and<br>Function<br>Hematological<br>System           | apoptosis       | apoptosis of T lymphocytes                     | 4,51E-03 | CD3E, GZMB, LGALS2, SIVA1 | 4 |
| Development and<br>Function<br>Hematological<br>System           | apoptosis       | apoptosis of cytotoxic T<br>cells              | 3,05E-02 | GZMB                      | 1 |
| Development and<br>Function<br>Hematological<br>System           | apoptosis       | apoptosis of thymocytes                        | 3,48E-02 | CD3E, GZMB                | 2 |
| Development and<br>Function<br>Hematological<br>System           | attraction      | attraction of thymocytes                       | 6,17E-03 | CCL19                     | 1 |
| Development and<br>Function<br>Hematological<br>System           | chemoattraction | chemoattraction of<br>Langerhans cells         | 6,17E-03 | CCL19                     | 1 |
| Development and<br>Function<br>Hematological<br>System           | co-localization | co-localization of T<br>lymphocytes            | 6,17E-03 | CCL19                     | 1 |
| Development and<br>Function<br>Hematological<br>System           | co-localization | co-localization of antigen<br>presenting cells | 6,17E-03 | CCL19                     | 1 |
| Development and<br>Function<br>Hematological<br>System           | homeostasis     | homeostasis of naive T<br>lymphocytes          | 6,17E-03 | CCL19                     | 1 |
| Development and<br>Function<br>Hematological<br>System           | agglutination   | agglutination of blood<br>platelets            | 9,24E-03 | IGHM                      | 1 |

|                                                  |                |                                             |          |               |   |
|--------------------------------------------------|----------------|---------------------------------------------|----------|---------------|---|
| Development and Function<br>Hematological System |                |                                             |          |               |   |
| Development and Function<br>Hematological System | regeneration   | regeneration of myeloid cells               | 9,24E-03 | TYROBP        | 1 |
| Development and Function<br>Hematological System | polarization   | polarization of T lymphocytes               | 9,63E-03 | CCL19, RASSF5 | 2 |
| Development and Function<br>Hematological System | polarization   | polarization of naive T lymphocytes         | 3,05E-02 | CCL19         | 1 |
| Development and Function<br>Hematological System | priming        | priming of naive T lymphocytes              | 1,23E-02 | CD86          | 1 |
| Development and Function<br>Hematological System | priming        | priming of cytotoxic T cells                | 2,14E-02 | CD86          | 1 |
| Development and Function<br>Hematological System | cell spreading | cell spreading of T lymphocytes             | 1,84E-02 | CD3E          | 1 |
| Development and Function<br>Hematological System | cell spreading | cell spreading of blood platelets           | 3,35E-02 | GZMB          | 1 |
| Development and Function<br>Hematological System | survival       | survival of bone marrow-derived macrophages | 1,84E-02 | TYROBP        | 1 |
| Development and Function<br>Hematological System | survival       | survival of T lymphocytes                   | 2,42E-02 | CD86, CD3E    | 2 |
| Development and Function<br>Hematological System | interaction    | interaction of dendritic cells              | 2,14E-02 | CD86          | 1 |
| Development and Function<br>Hematological System | stimulation    | stimulation of mast cells                   | 2,14E-02 | TAC1          | 1 |
| Development and Function<br>Hematological System | stimulation    | stimulation of leukocytes                   | 4,10E-02 | CD86, TAC1    | 2 |
| Development and Function<br>Hematological System | inhibition     | inhibition of effector T lymphocytes        | 2,75E-02 | CD86          | 1 |
| Development and Function<br>Hematological System | function       | function of natural killer cells            | 3,05E-02 | CD86          | 1 |
| Development and Function<br>Hematological System | transmigration | transmigration of leukocytes                | 3,28E-02 | CCL19, CD86   | 2 |
| Development and Function<br>Hematological System | transmigration | transmigration of dendritic cells           | 4,24E-02 | CCL19         | 1 |

| Function                 |                 |                                                         |          |                                                                      |    |
|--------------------------|-----------------|---------------------------------------------------------|----------|----------------------------------------------------------------------|----|
| Hematological System     |                 |                                                         |          |                                                                      |    |
| Development and Function | recruitment     | recruitment of dendritic cells                          | 4,54E-02 | CCL19<br>CCL19, CD86, CD3E, DEF6, GZMB, IGHM, LGALS2, NCAPH2, PSMB9, | 1  |
| Hematopoiesis            | development     | T cell development                                      | 1,29E-07 | RASSF5, SIVA1, SST<br>CCL19, CD3E, DEF6, GZMB, IGHM,                 | 12 |
| Hematopoiesis            | cell death      | cell death of T lymphocytes                             | 1,21E-05 | LGALS2, SIVA1                                                        | 7  |
| Hematopoiesis            | cell death      | cell death of Th2 cells                                 | 2,14E-02 | GZMB                                                                 | 1  |
| Hematopoiesis            | cell death      | cell death of naive T lymphocytes                       | 4,24E-02 | CCL19<br>CCL19, CD86, CD3E, DEF6, IGHM,                              | 1  |
| Hematopoiesis            | differentiation | differentiation of lymphocytes                          | 1,59E-04 | NCAPH2, RASSF5<br>CCL19, CD86, CD3E, DEF6, NCAPH2,                   | 7  |
| Hematopoiesis            | differentiation | differentiation of T lymphocytes                        | 2,57E-04 | RASSF5                                                               | 6  |
| Hematopoiesis            | differentiation | differentiation of naive T lymphocytes                  | 5,51E-03 | CD86, DEF6                                                           | 2  |
| Hematopoiesis            | differentiation | differentiation of thymocytes                           | 8,50E-03 | CD86, CD3E                                                           | 2  |
| Hematopoiesis            | differentiation | differentiation of effector T lymphocytes               | 3,35E-02 | DEF6                                                                 | 1  |
| Hematopoiesis            | generation      | generation of cytotoxic T cells                         | 3,32E-04 | CD86, PSMB9                                                          | 2  |
| Hematopoiesis            | chemotaxis      | chemotaxis of CD34+ cells                               | 3,09E-03 | CCL19                                                                | 1  |
| Hematopoiesis            | chemotaxis      | chemotaxis of thymocytes                                | 2,75E-02 | CCL19                                                                | 1  |
| Hematopoiesis            | quantity        | quantity of thymocytes                                  | 3,73E-03 | CD86, CD3E, SST                                                      | 3  |
| Hematopoiesis            | quantity        | quantity of pre-B lymphocytes                           | 5,51E-03 | IGHM, IGKC                                                           | 2  |
| Hematopoiesis            | quantity        | quantity of pre-B1 lymphocytes                          | 1,23E-02 | IGHM                                                                 | 1  |
| Hematopoiesis            | quantity        | quantity of pre-B2 lymphocytes                          | 1,54E-02 | IGHM                                                                 | 1  |
| Hematopoiesis            | quantity        | quantity of pre-T lymphocytes                           | 2,45E-02 | CD3E                                                                 | 1  |
| Hematopoiesis            | apoptosis       | apoptosis of T lymphocytes                              | 4,51E-03 | CD3E, GZMB, LGALS2, SIVA1                                            | 4  |
| Hematopoiesis            | apoptosis       | apoptosis of cytotoxic T cells                          | 3,05E-02 | GZMB                                                                 | 1  |
| Hematopoiesis            | apoptosis       | apoptosis of thymocytes                                 | 3,48E-02 | CD3E, GZMB                                                           | 2  |
| Hematopoiesis            | proliferation   | proliferation of long-term culture-initiating cells     | 6,17E-03 | TAC1                                                                 | 1  |
| Hematopoiesis            | proliferation   | proliferation of colony-forming granulocyte-macrophages | 1,23E-02 | TAC1                                                                 | 1  |
| Hematopoiesis            | proliferation   | proliferation of thymocytes                             | 2,08E-02 | CD3E, SST                                                            | 2  |
| Hematopoiesis            | proliferation   | proliferation of hematopoietic progenitor cells         | 2,30E-02 | CD3E, TAC1                                                           | 2  |
| Hematopoiesis            | proliferation   | proliferation of lymphoblasts                           | 2,75E-02 | CD3E                                                                 | 1  |
| Hematopoiesis            | proliferation   | proliferation of pro-B lymphocytes                      | 4,24E-02 | IGHM                                                                 | 1  |
| Hematopoiesis            | binding         | binding of lymphoblasts                                 | 9,24E-03 | CD3E                                                                 | 1  |
| Hematopoiesis            | polarization    | polarization of T lymphocytes                           | 9,63E-03 | CCL19, RASSF5                                                        | 2  |
| Hematopoiesis            | polarization    | polarization of naive T lymphocytes                     | 3,05E-02 | CCL19                                                                | 1  |
| Hematopoiesis            | activation      | activation of thymocytes                                | 3,05E-02 | CD3E                                                                 | 1  |
| Hematopoiesis            | migration       | migration of thymocytes                                 | 4,54E-02 | SST                                                                  | 1  |
| Cellular Movement        | migration       | Lymphocyte migration                                    | 2,21E-06 | CCL19, CD86, CD3E, RASSF5, SERP1,                                    | 8  |

|                   |                 |                                                          |          | SST, TAC1, TNFRSF14                                               |    |
|-------------------|-----------------|----------------------------------------------------------|----------|-------------------------------------------------------------------|----|
| Cellular Movement | migration       | migration of dendritic cells                             | 2,21E-03 | CCL19, CD86, TAC1                                                 | 3  |
| Cellular Movement | migration       | migration of normal cells                                | 2,25E-03 | CCL19, CD86, CD3E, RASSF5, SERP1, SST, TAC1, TNFRSF14, WARS       | 9  |
| Cellular Movement | migration       | T cell migration                                         | 2,98E-03 | CCL19, CD86, SST, TNFRSF14                                        | 4  |
| Cellular Movement | migration       | migration of eukaryotic cells                            | 4,21E-03 | CCL19, CD86, CD3E, GZMB, RASSF5, SERP1, SST, TAC1, TNFRSF14, WARS | 10 |
| Cellular Movement | migration       | migration of neuroblastoma cell lines                    | 3,05E-02 | SST                                                               | 1  |
| Cellular Movement | migration       | migration of PBMC cells                                  | 3,35E-02 | CCL19                                                             | 1  |
| Cellular Movement | migration       | migration of lung cell lines                             | 3,95E-02 | SST                                                               | 1  |
| Cellular Movement | migration       | migration of thymocytes                                  | 4,54E-02 | SST                                                               | 1  |
| Cellular Movement | infiltration    | infiltration by dendritic cells                          | 4,14E-04 | CCL19, CD86                                                       | 2  |
| Cellular Movement | infiltration    | infiltration by T lymphocytes                            | 1,38E-02 | CCL19, CD86                                                       | 2  |
| Cellular Movement | extravasation   | extravasation of plasma cell movement of dendritic cells | 7,13E-04 | SST, TAC1                                                         | 2  |
| Cellular Movement | cell movement   | cell movement of lymphocytes                             | 1,06E-03 | CCL19, CD86, TAC1                                                 | 3  |
| Cellular Movement | cell movement   | cell movement of T lymphocytes                           | 5,05E-03 | CCL19, CD86, TAC1, TNFRSF14                                       | 4  |
| Cellular Movement | cell movement   | cell movement of T lymphocytes                           | 1,13E-02 | CCL19, CD86, TNFRSF14                                             | 3  |
| Cellular Movement | adhesion        | adhesion of T lymphocytes                                | 1,92E-03 | CCL19, RASSF5, TAC1                                               | 3  |
| Cellular Movement | chemotaxis      | chemotaxis of CD34+ cells                                | 3,09E-03 | CCL19                                                             | 1  |
| Cellular Movement | chemotaxis      | chemotaxis of lymphocytes                                | 5,10E-03 | CCL19, TAC1, TNFRSF14                                             | 3  |
| Cellular Movement | chemotaxis      | chemotaxis of squamous cell carcinoma cell lines         | 6,17E-03 | CCL19                                                             | 1  |
| Cellular Movement | chemotaxis      | chemotaxis of memory B cells                             | 1,23E-02 | CCL19                                                             | 1  |
| Cellular Movement | chemotaxis      | chemotaxis of dendritic cells                            | 1,25E-02 | CCL19, TAC1                                                       | 2  |
| Cellular Movement | chemotaxis      | chemotaxis of monocyte-derived dendritic cells           | 1,54E-02 | CCL19                                                             | 1  |
| Cellular Movement | chemotaxis      | chemotaxis of naive T lymphocytes                        | 1,54E-02 | CCL19                                                             | 1  |
| Cellular Movement | chemotaxis      | chemotaxis of T lymphocytes                              | 2,42E-02 | CCL19, TNFRSF14                                                   | 2  |
| Cellular Movement | chemotaxis      | chemotaxis of thymocytes                                 | 2,75E-02 | CCL19                                                             | 1  |
| Cellular Movement | chemotaxis      | chemotaxis of nervous tissue cell lines                  | 3,65E-02 | CCL19                                                             | 1  |
| Cellular Movement | chemotaxis      | chemotaxis of memory T lymphocytes                       | 3,95E-02 | CCL19                                                             | 1  |
| Cellular Movement | chemoattraction | chemoattraction of Langerhans cells                      | 6,17E-03 | CCL19                                                             | 1  |
| Cellular Movement | co-localization | co-localization of T lymphocytes                         | 6,17E-03 | CCL19                                                             | 1  |
| Cellular Movement | co-localization | co-localization of antigen presenting cells              | 6,17E-03 | CCL19                                                             | 1  |
| Cellular Movement | invasion        | invasion of neuroblastoma cell lines                     | 9,24E-03 | SST                                                               | 1  |
| Cellular Movement | invasion        | invasion of T lymphocytes                                | 1,54E-02 | SERP1                                                             | 1  |
| Cellular Movement | invasion        | invasion of normal cells                                 | 2,71E-02 | SERP1, SST                                                        | 2  |
| Cellular Movement | cell spreading  | cell spreading of T lymphocytes                          | 1,84E-02 | CD3E                                                              | 1  |
| Cellular Movement | transmigration  | transmigration of leukocytes                             | 3,28E-02 | CCL19, CD86                                                       | 2  |
| Cellular Movement | transmigration  | transmigration of dendritic cells                        | 4,24E-02 | CCL19                                                             | 1  |
| Immune Cell       | migration       | Lymphocyte migration                                     | 2,21E-06 | CCL19, CD86, CD3E, RASSF5, SERP1,                                 | 8  |



|                         |               |                                                |          |                                                        |   |
|-------------------------|---------------|------------------------------------------------|----------|--------------------------------------------------------|---|
| Trafficking             |               |                                                |          | SST, TAC1, TNFRSF14                                    |   |
| Immune Cell Trafficking | migration     | migration of dendritic cells                   | 2,21E-03 | CCL19, CD86, TAC1                                      | 3 |
| Immune Cell Trafficking | migration     | T cell migration                               | 2,98E-03 | CCL19, CD86, SST, TNFRSF14                             | 4 |
| Immune Cell Trafficking | migration     | migration of PBMC cells                        | 3,35E-02 | CCL19                                                  | 1 |
| Immune Cell Trafficking | migration     | migration of thymocytes                        | 4,54E-02 | SST                                                    | 1 |
| Immune Cell Trafficking | activation    | activation of leukocytes                       | 3,74E-05 | CD86, CD3E, DEF6, GZMB, IGHM, PSMB9, SST, TAC1, TYROBP | 9 |
| Immune Cell Trafficking | activation    | activation of lymphocytes                      | 1,31E-04 | CD86, CD3E, DEF6, GZMB, IGHM, TAC1, TYROBP             | 7 |
| Immune Cell Trafficking | activation    | activation of T lymphocytes                    | 1,97E-04 | TYROBP                                                 | 6 |
| Immune Cell Trafficking | activation    | activation of cytotoxic T cells                | 3,13E-04 | CD86, GZMB, TAC1                                       | 3 |
| Immune Cell Trafficking | activation    | activation of naive T lymphocytes              | 6,05E-04 | CD86, DEF6                                             | 2 |
| Immune Cell Trafficking | activation    | activation of antigen presenting cells         | 2,23E-03 | CD86, IGHM, PSMB9, TAC1                                | 4 |
| Immune Cell Trafficking | activation    | activation of effector lymphocytes             | 2,45E-02 | DEF6                                                   | 1 |
| Immune Cell Trafficking | activation    | activation of thymocytes                       | 3,05E-02 | CD3E                                                   | 1 |
| Immune Cell Trafficking | activation    | activation of B lymphocytes                    | 3,28E-02 | CD86, IGHM                                             | 2 |
| Immune Cell Trafficking | activation    | activation of natural killer cells             | 3,82E-02 | TAC1, TYROBP                                           | 2 |
| Immune Cell Trafficking | infiltration  | infiltration by dendritic cells                | 4,14E-04 | CCL19, CD86                                            | 2 |
| Immune Cell Trafficking | infiltration  | infiltration by T lymphocytes                  | 1,38E-02 | CCL19, CD86                                            | 2 |
| Immune Cell Trafficking | cell movement | cell movement of dendritic cells               | 1,06E-03 | CCL19, CD86, TAC1                                      | 3 |
| Immune Cell Trafficking | cell movement | cell movement of lymphocytes                   | 5,05E-03 | CCL19, CD86, TAC1, TNFRSF14                            | 4 |
| Immune Cell Trafficking | cell movement | cell movement of T lymphocytes                 | 1,13E-02 | CCL19, CD86, TNFRSF14                                  | 3 |
| Immune Cell Trafficking | adhesion      | adhesion of T lymphocytes                      | 1,92E-03 | CCL19, RASSF5, TAC1                                    | 3 |
| Immune Cell Trafficking | accumulation  | accumulation of mononuclear leukocytes         | 1,99E-03 | CD86, DEF6, PTGDS                                      | 3 |
| Immune Cell Trafficking | accumulation  | accumulation of effector memory T lymphocytes  | 3,09E-03 | DEF6                                                   | 1 |
| Immune Cell Trafficking | accumulation  | accumulation of T lymphocytes                  | 1,21E-02 | CD86, DEF6                                             | 2 |
| Immune Cell Trafficking | accumulation  | accumulation of monocytes                      | 2,75E-02 | PTGDS                                                  | 1 |
| Immune Cell Trafficking | chemotaxis    | chemotaxis of lymphocytes                      | 5,10E-03 | CCL19, TAC1, TNFRSF14                                  | 3 |
| Immune Cell Trafficking | chemotaxis    | chemotaxis of memory B cells                   | 1,23E-02 | CCL19                                                  | 1 |
| Immune Cell Trafficking | chemotaxis    | chemotaxis of dendritic cells                  | 1,25E-02 | CCL19, TAC1                                            | 2 |
| Immune Cell Trafficking | chemotaxis    | chemotaxis of monocyte-derived dendritic cells | 1,54E-02 | CCL19                                                  | 1 |
| Immune Cell Trafficking | chemotaxis    | chemotaxis of naive T lymphocytes              | 1,54E-02 | CCL19                                                  | 1 |
| Immune Cell Trafficking | chemotaxis    | chemotaxis of T lymphocytes                    | 2,42E-02 | CCL19, TNFRSF14                                        | 2 |
| Immune Cell Trafficking | chemotaxis    | chemotaxis of thymocytes                       | 2,75E-02 | CCL19                                                  | 1 |
| Immune Cell Trafficking | chemotaxis    | chemotaxis of memory T lymphocytes             | 3,95E-02 | CCL19                                                  | 1 |

|                                        |                 |                                             |          |                                                                    |    |
|----------------------------------------|-----------------|---------------------------------------------|----------|--------------------------------------------------------------------|----|
| Immune Cell Trafficking                | chemoattraction | chemoattraction of Langerhans cells         | 6,17E-03 | CCL19                                                              | 1  |
| Immune Cell Trafficking                | co-localization | co-localization of T lymphocytes            | 6,17E-03 | CCL19                                                              | 1  |
| Immune Cell Trafficking                | co-localization | co-localization of antigen presenting cells | 6,17E-03 | CCL19                                                              | 1  |
| Immune Cell Trafficking                | recruitment     | recruitment of lymphoid cells               | 6,17E-03 | CCL19                                                              | 1  |
| Immune Cell Trafficking                | recruitment     | recruitment of dendritic cells              | 4,54E-02 | CCL19                                                              | 1  |
| Immune Cell Trafficking                | priming         | priming of naive T lymphocytes              | 1,23E-02 | CD86                                                               | 1  |
| Immune Cell Trafficking                | priming         | priming of cytotoxic T cells                | 2,14E-02 | CD86                                                               | 1  |
| Immune Cell Trafficking                | invasion        | invasion of T lymphocytes                   | 1,54E-02 | SERP1                                                              | 1  |
| Immune Cell Trafficking                | cell spreading  | cell spreading of T lymphocytes             | 1,84E-02 | CD3E                                                               | 1  |
| Immune Cell Trafficking                | transmigration  | transmigration of leukocytes                | 3,28E-02 | CCL19, CD86                                                        | 2  |
| Immune Cell Trafficking                | transmigration  | transmigration of dendritic cells           | 4,24E-02 | CCL19                                                              | 1  |
| Cell-To-Cell Signaling and Interaction | binding         | binding of lymphocytes                      | 6,51E-06 | CCL19, CD86, CD3E, SST, TAC1                                       | 5  |
| Cell-To-Cell Signaling and Interaction | binding         | binding of cells                            | 9,78E-04 | CCL19, CD86, CD3E, GZMB, IGKC, SST, TAC1                           | 7  |
| Cell-To-Cell Signaling and Interaction | binding         | binding of T lymphocytes                    | 1,06E-03 | CD86, SST, TAC1                                                    | 3  |
| Cell-To-Cell Signaling and Interaction | binding         | binding of eukaryotic cells                 | 3,63E-03 | CCL19, CD86, CD3E, IGKC, SST, TAC1                                 | 6  |
| Cell-To-Cell Signaling and Interaction | binding         | binding of lymphoblasts                     | 9,24E-03 | CD3E                                                               | 1  |
| Cell-To-Cell Signaling and Interaction | binding         | binding of memory T lymphocytes             | 1,23E-02 | CD86                                                               | 1  |
| Cell-To-Cell Signaling and Interaction | binding         | binding of B lymphocytes                    | 4,83E-02 | CD86, CD3E, DEF6, GZMB, IGHM, IGK@, IGL@, PSMB9, SST, TAC1, TYROBP | 11 |
| Cell-To-Cell Signaling and Interaction | activation      | activation of cells                         | 3,00E-05 | CD86, CD3E, DEF6, GZMB, IGHM, PSMB9, SST, TAC1, TYROBP             | 9  |
| Cell-To-Cell Signaling and Interaction | activation      | activation of leukocytes                    | 3,74E-05 | CD86, CD3E, DEF6, GZMB, IGHM, TAC1, TYROBP                         | 7  |
| Cell-To-Cell Signaling and Interaction | activation      | activation of lymphocytes                   | 1,31E-04 | CD86, CD3E, DEF6, GZMB, IGHM, TAC1, TYROBP                         | 6  |
| Cell-To-Cell Signaling and Interaction | activation      | activation of T lymphocytes                 | 1,97E-04 | CD86, CD3E, DEF6, GZMB, TAC1, TYROBP                               | 3  |
| Cell-To-Cell Signaling and Interaction | activation      | activation of cytotoxic T cells             | 3,13E-04 | CD86, GZMB, TAC1                                                   | 2  |
| Cell-To-Cell Signaling and Interaction | activation      | activation of naive T lymphocytes           | 6,05E-04 | CD86, DEF6                                                         | 4  |
| Cell-To-Cell Signaling and Interaction | activation      | activation of antigen presenting cells      | 2,23E-03 | CD86, IGHM, PSMB9, TAC1                                            | 1  |
| Cell-To-Cell Signaling and Interaction | activation      | activation of synovial cells                | 1,54E-02 | TAC1                                                               |    |

|                                           |             |                                         |          |                                                       |   |
|-------------------------------------------|-------------|-----------------------------------------|----------|-------------------------------------------------------|---|
| Signaling and Interaction<br>Cell-To-Cell |             | activation of endocrine cells           | 1,84E-02 | GZMB                                                  | 1 |
| Signaling and Interaction<br>Cell-To-Cell | activation  | activation of endocrine cells           | 1,84E-02 | GZMB                                                  | 1 |
| Signaling and Interaction<br>Cell-To-Cell |             | activation of connective tissue cells   | 2,19E-02 | TAC1, TYROBP                                          | 2 |
| Signaling and Interaction<br>Cell-To-Cell | activation  | activation of connective tissue cells   | 2,19E-02 | TAC1, TYROBP                                          | 2 |
| Signaling and Interaction<br>Cell-To-Cell |             | activation of effector lymphocytes      | 2,45E-02 | DEF6                                                  | 1 |
| Signaling and Interaction<br>Cell-To-Cell | activation  | activation of effector lymphocytes      | 2,45E-02 | DEF6                                                  | 1 |
| Signaling and Interaction<br>Cell-To-Cell |             | activation of fibroblast cell lines     | 2,75E-02 | CD3E                                                  | 1 |
| Signaling and Interaction<br>Cell-To-Cell | activation  | activation of fibroblast cell lines     | 2,75E-02 | CD3E                                                  | 1 |
| Signaling and Interaction<br>Cell-To-Cell |             | activation of thymocytes                | 3,05E-02 | CD3E                                                  | 1 |
| Signaling and Interaction<br>Cell-To-Cell | activation  | activation of thymocytes                | 3,05E-02 | CD3E                                                  | 1 |
| Signaling and Interaction<br>Cell-To-Cell |             | activation of B lymphocytes             | 3,28E-02 | CD86, IGHM                                            | 2 |
| Signaling and Interaction<br>Cell-To-Cell | activation  | activation of B lymphocytes             | 3,28E-02 | CD86, IGHM                                            | 2 |
| Signaling and Interaction<br>Cell-To-Cell |             | activation of natural killer cells      | 3,82E-02 | TAC1, TYROBP                                          | 2 |
| Signaling and Interaction<br>Cell-To-Cell | activation  | activation of natural killer cells      | 3,82E-02 | TAC1, TYROBP                                          | 2 |
| Signaling and Interaction<br>Cell-To-Cell |             | response of leukocytes                  | 4,17E-05 | CCL19, CD86, CD3E, GZMB, RARRES3                      | 5 |
| Signaling and Interaction<br>Cell-To-Cell | response    | response of leukocytes                  | 4,17E-05 | CCL19, CD86, CD3E, GZMB, RARRES3                      | 5 |
| Signaling and Interaction<br>Cell-To-Cell |             | response of lymphocytes                 | 2,33E-04 | CCL19, CD86, CD3E, GZMB                               | 4 |
| Signaling and Interaction<br>Cell-To-Cell | response    | response of lymphocytes                 | 2,33E-04 | CCL19, CD86, CD3E, GZMB                               | 4 |
| Signaling and Interaction<br>Cell-To-Cell |             | response of cells                       | 3,23E-04 | CCL19, CD86, CD3E, GZMB, RARRES3, SST, TYROBP         | 7 |
| Signaling and Interaction<br>Cell-To-Cell | response    | response of cells                       | 3,23E-04 | CCL19, CD86, CD3E, GZMB, RARRES3, SST, TYROBP         | 7 |
| Signaling and Interaction<br>Cell-To-Cell |             | response of B lymphocytes               | 6,05E-04 | CCL19, GZMB                                           | 2 |
| Signaling and Interaction<br>Cell-To-Cell | response    | response of B lymphocytes               | 6,05E-04 | CCL19, GZMB                                           | 2 |
| Signaling and Interaction<br>Cell-To-Cell |             | response of dendritic cells             | 6,05E-04 | CCL19, RARRES3                                        | 2 |
| Signaling and Interaction<br>Cell-To-Cell | response    | response of dendritic cells             | 6,05E-04 | CCL19, RARRES3                                        | 2 |
| Signaling and Interaction<br>Cell-To-Cell |             | T cell response                         | 2,29E-03 | CCL19, CD86, CD3E                                     | 3 |
| Signaling and Interaction<br>Cell-To-Cell | response    | T cell response                         | 2,29E-03 | CCL19, CD86, CD3E                                     | 3 |
| Signaling and Interaction<br>Cell-To-Cell |             | response of peripheral blood leukocytes | 9,24E-03 | CCL19                                                 | 1 |
| Signaling and Interaction<br>Cell-To-Cell | response    | response of peripheral blood leukocytes | 9,24E-03 | CCL19                                                 | 1 |
| Signaling and Interaction<br>Cell-To-Cell |             | interaction of cells                    | 4,30E-04 | CD86, PCDH10, SST, TAC1                               | 4 |
| Signaling and Interaction<br>Cell-To-Cell | interaction | interaction of cells                    | 4,30E-04 | CD86, PCDH10, SST, TAC1                               | 4 |
| Signaling and Interaction<br>Cell-To-Cell |             | interaction of dendritic cells          | 2,14E-02 | CD86                                                  | 1 |
| Signaling and Interaction<br>Cell-To-Cell | interaction | interaction of dendritic cells          | 2,14E-02 | CD86                                                  | 1 |
| Signaling and Interaction<br>Cell-To-Cell |             | adhesion of blood cells                 | 1,66E-03 | CCL19, GZMB, IGHM, RASSF5, TAC1                       | 5 |
| Signaling and Interaction<br>Cell-To-Cell | adhesion    | adhesion of blood cells                 | 1,66E-03 | CCL19, GZMB, IGHM, RASSF5, TAC1                       | 5 |
| Signaling and Interaction<br>Cell-To-Cell |             | adhesion of T lymphocytes               | 1,92E-03 | CCL19, RASSF5, TAC1                                   | 3 |
| Signaling and Interaction<br>Cell-To-Cell | adhesion    | adhesion of T lymphocytes               | 1,92E-03 | CCL19, RASSF5, TAC1                                   | 3 |
| Signaling and Interaction<br>Cell-To-Cell |             | adhesion of cells                       | 4,55E-03 | CCL19, GZMB, IGHA1, IGHM, NINJ1, PCDH10, RASSF5, TAC1 | 8 |
| Signaling and Interaction<br>Cell-To-Cell | adhesion    | adhesion of cells                       | 4,55E-03 | CCL19, GZMB, IGHA1, IGHM, NINJ1, PCDH10, RASSF5, TAC1 | 8 |
| Signaling and Interaction<br>Cell-To-Cell |             | adhesion of blood platelets             | 8,14E-03 | GZMB, IGHM                                            | 2 |
| Signaling and Interaction<br>Cell-To-Cell | adhesion    | adhesion of blood platelets             | 8,14E-03 | GZMB, IGHM                                            | 2 |
| Signaling and Interaction<br>Cell-To-Cell |             | detachment of breast cell lines         | 3,09E-03 | GZMB                                                  | 1 |
| Signaling and Interaction<br>Cell-To-Cell | detachment  | detachment of breast cell lines         | 3,09E-03 | GZMB                                                  | 1 |

|                                        |                   |                                     |          |               |   |
|----------------------------------------|-------------------|-------------------------------------|----------|---------------|---|
| Cell-To-Cell Signaling and Interaction | detachment        | detachment of endothelial cells     | 9,24E-03 | GZMB          | 1 |
| Cell-To-Cell Signaling and Interaction | responsiveness    | responsiveness of B lymphocytes     | 3,09E-03 | CCL19         | 1 |
| Cell-To-Cell Signaling and Interaction | attraction        | attraction of thymocytes            | 6,17E-03 | CCL19         | 1 |
| Cell-To-Cell Signaling and Interaction | chemoattraction   | chemoattraction of Langerhans cells | 6,17E-03 | CCL19         | 1 |
| Cell-To-Cell Signaling and Interaction | recruitment       | recruitment of lymphoid cells       | 6,17E-03 | CCL19         | 1 |
| Cell-To-Cell Signaling and Interaction | recruitment       | recruitment of dendritic cells      | 4,54E-02 | CCL19         | 1 |
| Cell-To-Cell Signaling and Interaction | agglutination     | agglutination of blood platelets    | 9,24E-03 | IGHM          | 1 |
| Cell-To-Cell Signaling and Interaction | degeneration      | degeneration of synapse             | 1,23E-02 | TYROBP        | 1 |
| Cell-To-Cell Signaling and Interaction | priming           | priming of naive T lymphocytes      | 1,23E-02 | CD86          | 1 |
| Cell-To-Cell Signaling and Interaction | priming           | priming of cytotoxic T cells        | 2,14E-02 | CD86          | 1 |
| Cell-To-Cell Signaling and Interaction | stimulation       | stimulation of astrocytes           | 2,14E-02 | TAC1          | 1 |
| Cell-To-Cell Signaling and Interaction | stimulation       | stimulation of mast cells           | 2,14E-02 | TAC1          | 1 |
| Cell-To-Cell Signaling and Interaction | stimulation       | stimulation of endothelial cells    | 3,35E-02 | TAC1          | 1 |
| Cell-To-Cell Signaling and Interaction | stimulation       | stimulation of leukocytes           | 4,10E-02 | CD86, TAC1    | 2 |
| Cell-To-Cell Signaling and Interaction | stimulation       | stimulation of neurons              | 4,54E-02 | TAC1          | 1 |
| Cell-To-Cell Signaling and Interaction | conduction        | conduction of cells                 | 2,45E-02 | KCNAB2        | 1 |
| Cell-To-Cell Signaling and Interaction | phagocytosis      | phagocytosis of leukemia cell lines | 4,54E-02 | DEF6          | 1 |
| Cellular Compromise                    | destruction       | destruction of neurons              | 9,34E-06 | SST, TAC1     | 2 |
| Cellular Compromise                    | respiratory burst | respiratory burst of neutrophils    | 5,21E-03 | IGHA1, TYROBP | 2 |
| Cellular Compromise                    | perturbation      | perturbation of mitochondria        | 6,17E-03 | GZMB          | 1 |
| Cellular Compromise                    | shrinkage         | shrinkage of nucleus                | 6,17E-03 | RARRES3       | 1 |
| Cellular Compromise                    | collapse          | collapse of nucleus                 | 9,24E-03 | GZMB          | 1 |
| Cellular Compromise                    | degeneration      | degeneration of synapse             | 1,23E-02 | TYROBP        | 1 |
| Cellular Compromise                    | degeneration      | degeneration of myotube             | 1,54E-02 | STRA13        | 1 |

|                                        |                                           |                                                      |          |                                                                                                                    |    |
|----------------------------------------|-------------------------------------------|------------------------------------------------------|----------|--------------------------------------------------------------------------------------------------------------------|----|
| Cellular Compromise                    | apoptosis                                 | apoptosis of nucleus                                 | 2,75E-02 | GZMB                                                                                                               | 1  |
| Cellular Compromise                    | acidification                             | acidification of cells                               | 3,95E-02 | IGL@                                                                                                               | 1  |
| Cellular Compromise                    | damage                                    | damage of endothelial cells                          | 4,24E-02 | PTGDS                                                                                                              | 1  |
| Cellular Compromise                    | permeability transition                   | permeability transition of cells                     | 4,24E-02 | GZMB                                                                                                               | 1  |
| Dermatological Diseases and Conditions | contact dermatitis                        | initiation of contact dermatitis of mice             | 9,34E-06 | IGHM, IGKC                                                                                                         | 2  |
| Dermatological Diseases and Conditions | lepomatous leprosy                        | lepomatous leprosy                                   | 4,07E-04 | IGHM, IGK@, IGL@                                                                                                   | 3  |
| Dermatological Diseases and Conditions | epidermodysplasia verruciformis           | epidermodysplasia verruciformis                      | 6,17E-03 | TMC8                                                                                                               | 1  |
| Dermatological Diseases and Conditions | psoriatic arthritis                       | psoriatic arthritis                                  | 2,08E-02 | IGHM, IGKC                                                                                                         | 2  |
| Dermatological Diseases and Conditions | development                               | development of skin tumor                            | 2,45E-02 | CD86                                                                                                               | 1  |
| Dermatological Diseases and Conditions | edema                                     | edema of skin                                        | 3,05E-02 | TAC1                                                                                                               | 1  |
| Dermatological Diseases and Conditions | dermatological disorder                   | dermatological disorder                              | 4,01E-02 | CD86, IGHM, IGK@, IGKC, IGL@, TMC8                                                                                 | 6  |
| Immunological Disease                  | contact dermatitis                        | initiation of contact dermatitis of mice             | 9,34E-06 | IGHM, IGKC                                                                                                         | 2  |
| Immunological Disease                  | immunological disorder                    | immunological disorder of rodents                    | 1,57E-04 | CD86, CD3E, DEF6, IGHM, IGKC, TNFRSF14, TYROBP                                                                     | 7  |
| Immunological Disease                  | immunological disorder                    | immunological disorder of mice                       | 8,78E-04 | CD86, CD3E, DEF6, IGHM, IGKC, TYROBP                                                                               | 6  |
| Immunological Disease                  | immunological disorder                    | immunological disorder                               | 7,10E-03 | ADAP2, CCL19, CD86, CD3E, DEF6, GZMB, HLA-DPB1, IGHM, IGKC, IGL@, LST1, PSMB9, TAC1, TNFRSF14, TYROBP, WARS, ZNRD1 | 17 |
| Immunological Disease                  | disease                                   | disease of leukocytes                                | 9,19E-04 | CD86, RARRES3, TNFRSF14                                                                                            | 3  |
| Immunological Disease                  | disease                                   | disease of T lymphocytes                             | 1,09E-03 | CD86, TNFRSF14                                                                                                     | 2  |
| Immunological Disease                  | disease                                   | disease of dendritic cells                           | 3,95E-02 | RARRES3                                                                                                            | 1  |
| Immunological Disease                  | infection                                 | infection of leukocytes                              | 6,12E-03 | RARRES3, TNFRSF14                                                                                                  | 2  |
| Immunological Disease                  | infection                                 | infection of T lymphocytes                           | 2,75E-02 | TNFRSF14                                                                                                           | 1  |
| Immunological Disease                  | hyperplasia                               | hyperplasia of T lymphocytes                         | 6,17E-03 | CD86                                                                                                               | 1  |
| Immunological Disease                  | autoimmune disease                        | autoimmune disease of rodents                        | 6,80E-03 | CD86, DEF6, TNFRSF14, TYROBP                                                                                       | 4  |
| Immunological Disease                  | autoimmune disease                        | autoimmune disease of rodents                        | 9,75E-03 | ADAP2, CCL19, CD86, DEF6, GZMB, HLA-DPB1, IGHM, IGL@, LST1, PSMB9, TAC1, TNFRSF14, TYROBP, WARS, ZNRD1             | 15 |
| Immunological Disease                  | autoimmune disease                        | autoimmune disease of mice                           | 3,40E-02 | CD86, DEF6, TYROBP                                                                                                 | 3  |
| Immunological Disease                  | T-cell leukemia                           | T-cell leukemia                                      | 7,44E-03 | CD86, CD3E                                                                                                         | 2  |
| Immunological Disease                  | experimental autoimmune encephalomyelitis | experimental autoimmune encephalomyelitis of rodents | 1,17E-02 | CD86, TNFRSF14, TYROBP                                                                                             | 3  |
| Immunological Disease                  | experimental autoimmune                   | experimental autoimmune                              | 3,95E-02 | TNFRSF14                                                                                                           | 1  |

|                                   |                                           |                                                      |          |                                                                                                    |    |
|-----------------------------------|-------------------------------------------|------------------------------------------------------|----------|----------------------------------------------------------------------------------------------------|----|
| Disease                           | encephalomyelitis                         | encephalomyelitis of rats                            |          |                                                                                                    |    |
| Immunological Disease             | agammaglobulinemia precursor T-cell       | agammaglobulinemia precursor T-cell                  | 1,23E-02 | IGHM                                                                                               | 1  |
| Immunological Disease             | lymphoblastic leukemia-lymphoma           | lymphoblastic leukemia-lymphoma of mice              | 1,23E-02 | CD3E<br>ADAP2, CCL19, CD86, DEF6, GZMB, HLA-DPB1, IGHM, IGL@, LST1, PSMB9, TAC1                    | 1  |
| Immunological Disease             | rheumatoid arthritis                      | rheumatoid arthritis                                 | 1,81E-02 |                                                                                                    | 11 |
| Immunological Disease             | rheumatoid arthritis                      | rheumatoid arthritis of mice                         | 4,24E-02 | DEF6                                                                                               | 1  |
| Immunological Disease             | experimental autoimmune myasthenia gravis | experimental autoimmune myasthenia gravis of mice    | 1,84E-02 | CD86                                                                                               | 1  |
| Immunological Disease             | B-cell leukemia                           | B-cell leukemia of mice                              | 2,14E-02 | CD3E                                                                                               | 1  |
| Immunological Disease             | B-cell leukemia                           | B-cell leukemia                                      | 4,54E-02 | CD86, CD3E                                                                                         | 2  |
| Immunological Disease             | adult T cell leukemia                     | adult T cell leukemia                                | 2,14E-02 | CD86                                                                                               | 1  |
| Immunological Disease             | hypersensitive reaction                   | hypersensitive reaction                              | 2,63E-02 | CD86, IGHM, IGKC                                                                                   | 3  |
| Immunological Disease             | hypergammaglobulinemia                    | hypergammaglobulinemia of mice                       | 2,75E-02 | DEF6                                                                                               | 1  |
| Immunological Disease             | eosinophilia                              | eosinophilia of lung                                 | 3,05E-02 | CD86                                                                                               | 1  |
| Immunological Disease             | acute lymphocytic leukemia                | acute lymphocytic leukemia                           | 3,75E-02 | CD86, CD3E                                                                                         | 2  |
| Inflammatory Disease              | contact dermatitis                        | initiation of contact dermatitis of mice             | 9,34E-06 | IGHM, IGKC                                                                                         | 2  |
| Inflammatory Disease              | inflammatory disorder                     | inflammatory disorder of rodents                     | 8,73E-04 | CD86, DEF6, GZMB, IGHM, IGKC, TNFRSF14, TYROBP                                                     | 7  |
| Inflammatory Disease              | inflammatory disorder                     | inflammatory disorder of mice                        | 3,67E-03 | CD86, DEF6, GZMB, IGHM, IGKC, TYROBP                                                               | 6  |
| Inflammatory Disease              | systemic juvenile idiopathic arthritis    | systemic juvenile idiopathic arthritis               | 3,60E-03 | CD86, IGKC                                                                                         | 2  |
| Inflammatory Disease              | vasculitis                                | vasculitis of blood vessel                           | 6,17E-03 | DEF6                                                                                               | 1  |
| Inflammatory Disease              | vasculitis                                | vasculitis                                           | 7,78E-03 | CD86, DEF6<br>ADAP2, CCL19, CD86, DEF6, GZMB, HLA-DPB1, IGHM, IGKC, IGL@, LST1, PSMB9, PTGDS, TAC1 | 2  |
| Inflammatory Disease              | arthritis                                 | arthritis                                            | 7,17E-03 |                                                                                                    | 13 |
| Inflammatory Disease              | colitis                                   | colitis                                              | 7,51E-03 | CD86, CD3E, IGHM                                                                                   | 3  |
| Inflammatory Disease              | experimental autoimmune encephalomyelitis | experimental autoimmune encephalomyelitis of rodents | 1,17E-02 | CD86, TNFRSF14, TYROBP                                                                             | 3  |
| Inflammatory Disease              | experimental autoimmune encephalomyelitis | experimental autoimmune encephalomyelitis of rats    | 3,95E-02 | TNFRSF14                                                                                           | 1  |
| Inflammatory Disease              | ulcerative colitis                        | ulcerative colitis                                   | 1,25E-02 | CD86, CD3E<br>ADAP2, CCL19, CD86, DEF6, GZMB, HLA-DPB1, IGHM, IGL@, LST1, PSMB9, TAC1              | 2  |
| Inflammatory Disease              | rheumatoid arthritis                      | rheumatoid arthritis                                 | 1,81E-02 |                                                                                                    | 11 |
| Inflammatory Disease              | rheumatoid arthritis                      | rheumatoid arthritis of mice                         | 4,24E-02 | DEF6                                                                                               | 1  |
| Inflammatory Disease              | psoriatic arthritis                       | psoriatic arthritis                                  | 2,08E-02 | IGHM, IGKC                                                                                         | 2  |
| Inflammatory Disease              | Wegener's granulomatosis                  | Wegener's granulomatosis                             | 2,75E-02 | CD86                                                                                               | 1  |
| Inflammatory Disease              | asthma                                    | asthma of mice                                       | 4,83E-02 | GZMB<br>BOP1, CCL19, CD86, CD3E, DEF6, GZMB, HLA-DPB1, IGHM, IGKC, LST1, PTGDS, RARRES3, RASSF5,   | 1  |
| Cellular Growth and Proliferation | proliferation                             | proliferation of eukaryotic cells                    | 1,02E-05 |                                                                                                    | 18 |

|                                   |                  |                                                          |          |                                                                                                                                              |    |
|-----------------------------------|------------------|----------------------------------------------------------|----------|----------------------------------------------------------------------------------------------------------------------------------------------|----|
| Cellular Growth and Proliferation | proliferation    | proliferation of normal cells                            | 1,34E-05 | SST, STRA13, TAC1, TNFRSF14, TYROBP<br>CCL19, CD86, CD3E, DEF6, GZMB, HLA-DPB1, IGHM, IGKC, LST1, PTGDS, SST, STRA13, TAC1, TNFRSF14, TYROBP | 15 |
| Cellular Growth and Proliferation | proliferation    | proliferation of cells                                   | 1,51E-05 | BOP1, CCL19, CD86, CD3E, DEF6, GZMB, HLA-DPB1, IGHM, IGKC, LST1, PDF, PTGDS, RARRES3, RASSF5, SST, STRA13, TAC1, TNFRSF14, TYROBP, WARS      | 20 |
| Cellular Growth and Proliferation | proliferation    | proliferation of leukocytes                              | 1,81E-05 | TYROBP                                                                                                                                       | 10 |
| Cellular Growth and Proliferation | proliferation    | proliferation of lymphocytes                             | 7,37E-05 | CD86, CD3E, DEF6, IGHM, IGKC, LST1, SST, TAC1, TNFRSF14                                                                                      | 9  |
| Cellular Growth and Proliferation | proliferation    | proliferation of lymphatic system cells                  | 8,08E-04 | CD86, IGHM, SST, TAC1                                                                                                                        | 4  |
| Cellular Growth and Proliferation | proliferation    | proliferation of alpha-beta T lymphocytes                | 1,09E-03 | CD3E, TNFRSF14                                                                                                                               | 2  |
| Cellular Growth and Proliferation | proliferation    | proliferation of epithelial cell lines                   | 1,72E-03 | BOP1, RARRES3, TAC1                                                                                                                          | 3  |
| Cellular Growth and Proliferation | proliferation    | proliferation of bronchoalveolar lavage cells            | 3,09E-03 | HLA-DPB1                                                                                                                                     | 1  |
| Cellular Growth and Proliferation | proliferation    | proliferation of T lymphocytes                           | 3,21E-03 | CD86, CD3E, DEF6, IGHM, SST, TNFRSF14                                                                                                        | 6  |
| Cellular Growth and Proliferation | proliferation    | proliferation of naive T lymphocytes                     | 3,60E-03 | CD3E, DEF6                                                                                                                                   | 2  |
| Cellular Growth and Proliferation | proliferation    | proliferation of B lymphocytes                           | 3,63E-03 | CD86, CD3E, IGHM, IGKC                                                                                                                       | 4  |
| Cellular Growth and Proliferation | proliferation    | proliferation of colon cell lines                        | 6,17E-03 | TAC1                                                                                                                                         | 1  |
| Cellular Growth and Proliferation | proliferation    | proliferation of long-term culture-initiating cells      | 6,17E-03 | TAC1                                                                                                                                         | 1  |
| Cellular Growth and Proliferation | proliferation    | proliferation of peripheral blood mononuclear leukocytes | 6,17E-03 | LST1                                                                                                                                         | 1  |
| Cellular Growth and Proliferation | proliferation    | proliferation of splenocytes                             | 1,16E-02 | IGHM, SST                                                                                                                                    | 2  |
| Cellular Growth and Proliferation | proliferation    | proliferation of colony-forming granulocyte-macrophages  | 1,23E-02 | TAC1                                                                                                                                         | 1  |
| Cellular Growth and Proliferation | proliferation    | proliferation of breast cancer cell lines                | 1,34E-02 | IGKC, RARRES3, TAC1                                                                                                                          | 3  |
| Cellular Growth and Proliferation | proliferation    | proliferation of bone marrow-derived macrophages         | 1,84E-02 | TYROBP                                                                                                                                       | 1  |
| Cellular Growth and Proliferation | proliferation    | proliferation of thymocytes                              | 2,08E-02 | CD3E, SST                                                                                                                                    | 2  |
| Cellular Growth and Proliferation | proliferation    | proliferation of hematopoietic progenitor cells          | 2,30E-02 | CD3E, TAC1                                                                                                                                   | 2  |
| Cellular Growth and Proliferation | proliferation    | proliferation of lymphoblasts                            | 2,75E-02 | CD3E                                                                                                                                         | 1  |
| Cellular Growth and Proliferation | proliferation    | proliferation of multilineage progenitor cells           | 3,95E-02 | CCL19                                                                                                                                        | 1  |
| Cellular Growth and Proliferation | proliferation    | proliferation of myoblasts                               | 4,24E-02 | STRA13                                                                                                                                       | 1  |
| Cellular Growth and Proliferation | proliferation    | proliferation of pro-B lymphocytes                       | 4,24E-02 | IGHM                                                                                                                                         | 1  |
| Cellular Growth and Proliferation | proliferation    | proliferation of cell lines                              | 4,78E-02 | BOP1, CD3E, IGKC, RARRES3, RASSF5, SST, TAC1                                                                                                 | 7  |
| Cellular Growth                   | colony formation | colony formation of                                      | 3,32E-04 | GZMB, RASSF5                                                                                                                                 | 2  |

|                                   |                  |                                            |          |                                                                        |    |
|-----------------------------------|------------------|--------------------------------------------|----------|------------------------------------------------------------------------|----|
| and Proliferation                 |                  | melanoma cell lines                        |          |                                                                        |    |
| Cellular Growth and Proliferation | colony formation | colony formation of tumor cell lines       | 2,31E-02 | GZMB, RASSF5, SIVA1                                                    | 3  |
| Cellular Growth and Proliferation | generation       | generation of cytotoxic T cells            | 3,32E-04 | CD86, PSMB9                                                            | 2  |
| Cellular Growth and Proliferation | generation       | generation of splenocytes                  | 9,24E-03 | CD86                                                                   | 1  |
| Cellular Growth and Proliferation | expansion        | expansion of T lymphocytes                 | 2,95E-03 | CD86, CD3E, IGHM                                                       | 3  |
| Cellular Growth and Proliferation | expansion        | expansion of splenocytes                   | 1,23E-02 | CD3E                                                                   | 1  |
| Cellular Growth and Proliferation | expansion        | expansion of cytotoxic T cells             | 1,54E-02 | IGHM                                                                   | 1  |
| Cellular Growth and Proliferation | growth           | arrest in growth of B cell lymphoma cells  | 3,09E-03 | IGHM                                                                   | 1  |
| Cellular Growth and Proliferation | growth           | arrest in growth of lung cancer cell lines | 2,45E-02 | RASSF5                                                                 | 1  |
| Cellular Growth and Proliferation | growth           | arrest in growth of carcinoma cell lines   | 3,35E-02 | RASSF5                                                                 | 1  |
| Cellular Growth and Proliferation | growth           | arrest in growth of tumor cell lines       | 3,48E-02 | IGHM, RASSF5                                                           | 2  |
| Cellular Growth and Proliferation | growth           | arrest in growth of lymphoma cell lines    | 4,24E-02 | IGHM                                                                   | 1  |
| Cellular Growth and Proliferation | stimulation      | stimulation of astrocytes                  | 2,14E-02 | TAC1                                                                   | 1  |
| Cellular Growth and Proliferation | stimulation      | stimulation of mast cells                  | 2,14E-02 | TAC1                                                                   | 1  |
| Cellular Growth and Proliferation | stimulation      | stimulation of endothelial cells           | 3,35E-02 | TAC1                                                                   | 1  |
| Cellular Growth and Proliferation | stimulation      | stimulation of leukocytes                  | 4,10E-02 | CD86, TAC1                                                             | 2  |
| Cellular Growth and Proliferation | stimulation      | stimulation of neurons                     | 4,54E-02 | TAC1                                                                   | 1  |
| Cellular Growth and Proliferation | inhibition       | inhibition of effector T lymphocytes       | 2,75E-02 | CD86                                                                   | 1  |
| Cell Death                        | cell death       | cell death of T lymphocytes                | 1,21E-05 | CCL19, CD3E, DEF6, GZMB, IGHM, LGALS2, SIVA1                           | 7  |
| Cell Death                        | cell death       | cell death of normal cells                 | 2,46E-03 | CCL19, CD3E, DEF6, GZMB, IGHM, LGALS2, PTGDS, RASSF5, SIVA1, SST, TAC1 | 11 |
| Cell Death                        | cell death       | cell death of Th2 cells                    | 2,14E-02 | GZMB                                                                   | 1  |
| Cell Death                        | cell death       | cell death of enteroendocrine cells        | 2,14E-02 | SST                                                                    | 1  |
| Cell Death                        | cell death       | cell death of naive T lymphocytes          | 4,24E-02 | CCL19                                                                  | 1  |
| Cell Death                        | apoptosis        | apoptosis of lymphoblasts                  | 9,56E-04 | CD3E, GZMB                                                             | 2  |
| Cell Death                        | apoptosis        | apoptosis of lymphocytes                   | 1,56E-03 | CD3E, GZMB, IGHM, LGALS2, SIVA1                                        | 5  |
| Cell Death                        | apoptosis        | initiation of apoptosis of tumor cells     | 3,09E-03 | GZMB                                                                   | 1  |
| Cell Death                        | apoptosis        | apoptosis of leukocyte cell lines          | 3,50E-03 | CD3E, GZMB, IGHM, SIVA1                                                | 4  |
| Cell Death                        | apoptosis        | apoptosis of T lymphocytes                 | 4,51E-03 | CD3E, GZMB, LGALS2, SIVA1                                              | 4  |
| Cell Death                        | apoptosis        | apoptosis of B-lymphoblastoid cells        | 1,54E-02 | GZMB                                                                   | 1  |
| Cell Death                        | apoptosis        | apoptosis of B cell hybridoma cells        | 1,84E-02 | SIVA1                                                                  | 1  |
| Cell Death                        | apoptosis        | apoptosis of nucleus                       | 2,75E-02 | GZMB                                                                   | 1  |
| Cell Death                        | apoptosis        | apoptosis of B lymphocytes                 | 2,77E-02 | GZMB, IGHM                                                             | 2  |
| Cell Death                        | apoptosis        | apoptosis of tumor cells                   | 2,93E-02 | GZMB, IGHM, TNFRSF14                                                   | 3  |
| Cell Death                        | apoptosis        | apoptosis of B cell lymphoma cells         | 3,05E-02 | IGHM                                                                   | 1  |
| Cell Death                        | apoptosis        | apoptosis of cytotoxic T                   | 3,05E-02 | GZMB                                                                   | 1  |



|                   |                                                     | cells                                                                           |          |                                                                   |    |
|-------------------|-----------------------------------------------------|---------------------------------------------------------------------------------|----------|-------------------------------------------------------------------|----|
| Cell Death        | apoptosis                                           | apoptosis of thymocytes                                                         | 3,48E-02 | CD3E, GZMB                                                        | 2  |
| Cell Death        | apoptosis                                           | apoptosis of neuroblastoma cells                                                | 4,54E-02 | TNFRSF14                                                          | 1  |
| Cell Death        | cell viability                                      | cell viability of keratinocytes                                                 | 3,09E-03 | RARRES3                                                           | 1  |
| Cell Death        | focal necrosis                                      | focal necrosis of liver                                                         | 3,09E-03 | TYROBP                                                            | 1  |
| Cell Death        | reconstitution                                      | reconstitution of osteoclasts                                                   | 3,09E-03 | TYROBP                                                            | 1  |
| Cell Death        | antibody-dependent cell-mediated cytotoxic reaction | antibody-dependent cell-mediated cytotoxic reaction of breast cancer cell lines | 6,17E-03 | IGKC                                                              | 1  |
| Cell Death        | cytotoxicity                                        | cytotoxicity of cell lines                                                      | 7,78E-03 | GZMB, TAC1                                                        | 2  |
| Cell Death        | cytotoxicity                                        | cytotoxicity of eukaryotic cells                                                | 1,88E-02 | GZMB, TAC1, TYROBP                                                | 3  |
| Cell Death        | regeneration                                        | regeneration of myeloid cells                                                   | 9,24E-03 | TYROBP                                                            | 1  |
| Cell Death        | survival                                            | survival of leukocytes                                                          | 1,83E-02 | CD86, CD3E, TYROBP                                                | 3  |
| Cell Death        | survival                                            | survival of bone marrow-derived macrophages                                     | 1,84E-02 | TYROBP                                                            | 1  |
| Cell Death        | survival                                            | survival of T lymphocytes                                                       | 2,42E-02 | CD86, CD3E                                                        | 2  |
| Cell Death        | survival                                            | survival of dendritic cells                                                     | 4,83E-02 | TYROBP                                                            | 1  |
| Cell Death        | necrosis                                            | necrosis of neurons                                                             | 2,14E-02 | TAC1                                                              | 1  |
| Cell Death        | activation-induced cell death                       | activation-induced cell death of T-cell hybrid cells                            | 3,65E-02 | CD3E                                                              | 1  |
| Cell Death        | cytolysis                                           | cytolysis of tumor cells                                                        | 3,95E-02 | GZMB                                                              | 1  |
| Cell Death        | cytolysis                                           | cytolysis                                                                       | 4,32E-02 | GZMB, IGKC                                                        | 2  |
| Tissue Morphology | quantity                                            | quantity of lymphocytes                                                         | 3,17E-05 | IGKC, SST, TYROBP                                                 | 8  |
| Tissue Morphology | quantity                                            | quantity of blood cells                                                         | 9,97E-05 | CCL19, CD86, CD3E, DEF6, IGHM, IGKC, SST, STRA13, TYROBP          | 9  |
| Tissue Morphology | quantity                                            | quantity of T lymphocytes                                                       | 1,71E-03 | CCL19, CD86, CD3E, DEF6, IGHM, IGKC, RARRES3, SST, STRA13, TYROBP | 5  |
| Tissue Morphology | quantity                                            | quantity of cells                                                               | 3,33E-03 | TYROBP                                                            | 10 |
| Tissue Morphology | quantity                                            | quantity of thymocytes                                                          | 3,73E-03 | CD86, CD3E, SST                                                   | 3  |
| Tissue Morphology | quantity                                            | quantity of pre-B lymphocytes                                                   | 5,51E-03 | IGHM, IGKC                                                        | 2  |
| Tissue Morphology | quantity                                            | quantity of suppressor T lymphocytes                                            | 6,17E-03 | CD86                                                              | 1  |
| Tissue Morphology | quantity                                            | quantity of natural killer cells                                                | 7,44E-03 | CD86, TYROBP                                                      | 2  |
| Tissue Morphology | quantity                                            | quantity of pre-B1 lymphocytes                                                  | 1,23E-02 | IGHM                                                              | 1  |
| Tissue Morphology | quantity                                            | quantity of dendritic cells                                                     | 1,25E-02 | CCL19, TYROBP                                                     | 2  |
| Tissue Morphology | quantity                                            | quantity of pre-B2 lymphocytes                                                  | 1,54E-02 | IGHM                                                              | 1  |
| Tissue Morphology | quantity                                            | quantity of myeloid dendritic cells                                             | 2,14E-02 | CCL19                                                             | 1  |
| Tissue Morphology | quantity                                            | quantity of pre-T lymphocytes                                                   | 2,45E-02 | CD3E                                                              | 1  |
| Tissue Morphology | quantity                                            | quantity of Peyer's patches                                                     | 3,05E-02 | IGHM                                                              | 1  |
| Tissue Morphology | quantity                                            | quantity of keratinocytes                                                       | 3,05E-02 | RARRES3                                                           | 1  |
| Tissue Morphology | quantity                                            | quantity of microglia                                                           | 3,35E-02 | TYROBP                                                            | 1  |
| Tissue Morphology | quantity                                            | quantity of plasmacytoid dendritic cells                                        | 3,35E-02 | TYROBP                                                            | 1  |
| Tissue Morphology | quantity                                            | quantity of mononuclear cells                                                   | 3,65E-02 | STRA13                                                            | 1  |

|                       |                 |                                                              |          |                                                                         |    |
|-----------------------|-----------------|--------------------------------------------------------------|----------|-------------------------------------------------------------------------|----|
| Tissue Morphology     | contraction     | contraction of bronchial smooth muscle                       | 3,09E-03 | TAC1                                                                    | 1  |
| Tissue Morphology     | contraction     | contraction of circular muscle layer                         | 3,09E-03 | TAC1                                                                    | 1  |
| Tissue Morphology     | contraction     | contraction of portal vein permeability of venular capillary | 2,14E-02 | TAC1                                                                    | 1  |
| Tissue Morphology     | permeability    |                                                              | 6,17E-03 | TAC1                                                                    | 1  |
| Tissue Morphology     | thickening      | thickening of aorta                                          | 6,17E-03 | PTGDS                                                                   | 1  |
| Tissue Morphology     | depolarization  | depolarization of smooth muscle                              | 9,24E-03 | TAC1                                                                    | 1  |
| Tissue Morphology     | volume          | volume of tumor tissue                                       | 1,23E-02 | CCL19                                                                   | 1  |
| Tissue Morphology     | relaxation      | relaxation of pulmonary artery                               | 1,54E-02 | TAC1                                                                    | 1  |
| Tissue Morphology     | relaxation      | relaxation of coronary artery                                | 2,45E-02 | TAC1                                                                    | 1  |
| Tissue Morphology     | stimulation     | stimulation of epithelial tissue                             | 1,84E-02 | TAC1                                                                    | 1  |
| Inflammatory Response | activation      | activation of leukocytes                                     | 3,74E-05 | CD86, CD3E, DEF6, GZMB, IGHM, PSMB9, SST, TAC1, TYROBP                  | 9  |
| Inflammatory Response | activation      | activation of lymphocytes                                    | 1,31E-04 | CD86, CD3E, DEF6, GZMB, IGHM, TAC1, TYROBP                              | 7  |
| Inflammatory Response | activation      | activation of T lymphocytes                                  | 1,97E-04 | TYROBP                                                                  | 6  |
| Inflammatory Response | activation      | activation of cytotoxic T cells                              | 3,13E-04 | CD86, GZMB, TAC1                                                        | 3  |
| Inflammatory Response | activation      | activation of naive T lymphocytes                            | 6,05E-04 | CD86, DEF6                                                              | 2  |
| Inflammatory Response | activation      | activation of antigen presenting cells                       | 2,23E-03 | CD86, IGHM, PSMB9, TAC1                                                 | 4  |
| Inflammatory Response | activation      | activation of effector lymphocytes                           | 2,45E-02 | DEF6                                                                    | 1  |
| Inflammatory Response | activation      | activation of thymocytes                                     | 3,05E-02 | CD3E                                                                    | 1  |
| Inflammatory Response | activation      | activation of B lymphocytes                                  | 3,28E-02 | CD86, IGHM                                                              | 2  |
| Inflammatory Response | activation      | activation of natural killer cells                           | 3,82E-02 | TAC1, TYROBP                                                            | 2  |
| Inflammatory Response | immune response | immune response                                              | 1,03E-04 | CCL19, CD86, CD3E, DEF6, GZMB, IGHM, PSMB9, SST, TAC1, TNFRSF14, TYROBP | 11 |
| Inflammatory Response | accumulation    | accumulation of mononuclear leukocytes                       | 1,99E-03 | CD86, DEF6, PTGDS                                                       | 3  |
| Inflammatory Response | accumulation    | accumulation of effector memory T lymphocytes                | 3,09E-03 | DEF6                                                                    | 1  |
| Inflammatory Response | accumulation    | accumulation of T lymphocytes                                | 1,21E-02 | CD86, DEF6                                                              | 2  |
| Inflammatory Response | accumulation    | accumulation of monocytes                                    | 2,75E-02 | PTGDS                                                                   | 1  |
| Inflammatory Response | modulation      | modulation of Kupffer cells                                  | 3,09E-03 | SST                                                                     | 1  |
| Inflammatory Response | chemotaxis      | chemotaxis of lymphocytes                                    | 5,10E-03 | CCL19, TAC1, TNFRSF14                                                   | 3  |
| Inflammatory Response | chemotaxis      | chemotaxis of memory B cells                                 | 1,23E-02 | CCL19                                                                   | 1  |
| Inflammatory Response | chemotaxis      | chemotaxis of dendritic cells                                | 1,25E-02 | CCL19, TAC1                                                             | 2  |
| Inflammatory Response | chemotaxis      | chemotaxis of monocyte-derived dendritic cells               | 1,54E-02 | CCL19                                                                   | 1  |
| Inflammatory Response | chemotaxis      | chemotaxis of naive T lymphocytes                            | 1,54E-02 | CCL19                                                                   | 1  |
| Inflammatory Response | chemotaxis      | chemotaxis of T lymphocytes                                  | 2,42E-02 | CCL19, TNFRSF14                                                         | 2  |
| Inflammatory Response | chemotaxis      | chemotaxis of thymocytes                                     | 2,75E-02 | CCL19                                                                   | 1  |

|                       |                                                     |                                                                                 |          |                                    |   |
|-----------------------|-----------------------------------------------------|---------------------------------------------------------------------------------|----------|------------------------------------|---|
| Inflammatory Response | chemotaxis                                          | chemotaxis of memory T lymphocytes                                              | 3,95E-02 | CCL19                              | 1 |
| Inflammatory Response | respiratory burst                                   | respiratory burst of neutrophils                                                | 5,21E-03 | IGHA1, TYROBP                      | 2 |
| Inflammatory Response | Th2 immune response                                 | Th2 immune response of natural killer T lymphocytes                             | 6,17E-03 | CD86                               | 1 |
| Inflammatory Response | antibody-dependent cell-mediated cytotoxic reaction | antibody-dependent cell-mediated cytotoxic reaction of breast cancer cell lines | 6,17E-03 | IGKC                               | 1 |
| Inflammatory Response | chemoattraction                                     | chemoattraction of Langerhans cells                                             | 6,17E-03 | CCL19                              | 1 |
| Inflammatory Response | co-localization                                     | co-localization of T lymphocytes                                                | 6,17E-03 | CCL19                              | 1 |
| Inflammatory Response | adhesion                                            | adhesion of blood platelets                                                     | 8,14E-03 | GZMB, IGHM                         | 2 |
| Inflammatory Response | agglutination                                       | agglutination of blood platelets                                                | 9,24E-03 | IGHM                               | 1 |
| Inflammatory Response | priming                                             | priming of naive T lymphocytes                                                  | 1,23E-02 | CD86                               | 1 |
| Inflammatory Response | priming                                             | priming of cytotoxic T cells                                                    | 2,14E-02 | CD86                               | 1 |
| Inflammatory Response | proliferation                                       | proliferation of bone marrow-derived macrophages                                | 1,84E-02 | TYROBP                             | 1 |
| Inflammatory Response | antiviral response                                  | antiviral response of organism                                                  | 2,14E-02 | CCL19, RARRES3                     | 2 |
| Inflammatory Response | antiviral response                                  | antiviral response of mammalia                                                  | 3,65E-02 | RARRES3                            | 1 |
| Inflammatory Response | inflammation                                        | inflammation of paw                                                             | 3,05E-02 | TAC1                               | 1 |
| Inflammatory Response | inflammation                                        | inflammation of respiratory system component                                    | 4,24E-02 | CD86, TAC1                         | 2 |
| Inflammatory Response | cell spreading                                      | cell spreading of blood platelets                                               | 3,35E-02 | GZMB                               | 1 |
| Inflammatory Response | quantity                                            | quantity of plasmacytoid dendritic cells                                        | 3,35E-02 | TYROBP                             | 1 |
| Inflammatory Response | transmigration                                      | transmigration of dendritic cells                                               | 4,24E-02 | CCL19                              | 1 |
| Inflammatory Response | phagocytosis                                        | phagocytosis of leukemia cell lines                                             | 4,54E-02 | DEF6                               | 1 |
| Inflammatory Response | recruitment                                         | recruitment of dendritic cells                                                  | 4,54E-02 | CCL19                              | 1 |
| Molecular Transport   | release                                             | release of 5-hydroxytryptamine                                                  | 1,29E-04 | SST, TAC1, TYROBP                  | 3 |
| Molecular Transport   | release                                             | release of glycine                                                              | 3,09E-03 | TAC1                               | 1 |
| Molecular Transport   | release                                             | release of cyclic AMP                                                           | 2,75E-02 | SST                                | 1 |
| Molecular Transport   | quantity                                            | quantity of calcium                                                             | 2,12E-03 | CCL19, CD3E, IGHM, IGKC, SST, TAC1 | 6 |
| Molecular Transport   | quantity                                            | quantity of GMP                                                                 | 6,17E-03 | TAC1                               | 1 |
| Molecular Transport   | quantity                                            | quantity of prostaglandin D2                                                    | 9,24E-03 | PTGDS                              | 1 |
| Molecular Transport   | quantity                                            | quantity of acetylcholine                                                       | 2,75E-02 | TAC1                               | 1 |
| Molecular Transport   | quantity                                            | quantity of L-glutamic acid                                                     | 4,24E-02 | SST                                | 1 |
| Molecular Transport   | co-localization                                     | co-localization of phosphatidylserine                                           | 3,09E-03 | IGHM                               | 1 |
| Molecular Transport   | co-localization                                     | co-localization of ganglioside GM1                                              | 6,17E-03 | IGHM                               | 1 |
| Molecular Transport   | mobilization                                        | mobilization of calcium                                                         | 5,18E-03 | CCL19, CD3E, DEF6, TAC1, TYROBP    | 5 |

|                             |                 |                                            |          |                        |   |
|-----------------------------|-----------------|--------------------------------------------|----------|------------------------|---|
| Molecular Transport         | mobilization    | mobilization of Ca <sup>2+</sup>           | 1,07E-02 | CD3E, TAC1, TYROBP     | 3 |
| Molecular Transport         | flux            | flux of calcium                            | 7,19E-03 | CCL19, CD3E, IGHM, SST | 4 |
| Molecular Transport         | accumulation    | accumulation of cyclic AMP                 | 7,20E-03 | IGHM, SST, TAC1        | 3 |
| Molecular Transport         | secretion       | secretion of lactic acid                   | 9,24E-03 | TAC1                   | 1 |
| Molecular Transport         | secretion       | secretion of antibody                      | 1,23E-02 | IGHM                   | 1 |
| Molecular Transport         | secretion       | secretion of beta-estradiol                | 3,35E-02 | TAC1                   | 1 |
| Molecular Transport         | transport       | transport of norepinephrine                | 9,24E-03 | TAC1                   | 1 |
| Small Molecule Biochemistry | release         | release of 5-hydroxytryptamine             | 1,29E-04 | SST, TAC1, TYROBP      | 3 |
| Small Molecule Biochemistry | release         | release of glycine                         | 3,09E-03 | TAC1                   | 1 |
| Small Molecule Biochemistry | release         | release of cyclic AMP                      | 2,75E-02 | SST                    | 1 |
| Small Molecule Biochemistry | phosphorylation | phosphorylation of L-tyrosine              | 2,21E-03 | CD3E, IGHM, TNFRSF14   | 3 |
| Small Molecule Biochemistry | aminoacylation  | aminoacylation of L-tryptophanyl-tRNA(Trp) | 3,09E-03 | WARS                   | 1 |
| Small Molecule Biochemistry | co-localization | co-localization of phosphatidylserine      | 3,09E-03 | IGHM                   | 1 |
| Small Molecule Biochemistry | co-localization | co-localization of ganglioside GM1         | 6,17E-03 | IGHM                   | 1 |
| Small Molecule Biochemistry | density         | density of Ca <sup>2+</sup>                | 3,09E-03 | CD3E                   | 1 |
| Small Molecule Biochemistry | efflux          | efflux of 5-hydroxytryptamine              | 3,09E-03 | TAC1                   | 1 |
| Small Molecule Biochemistry | inhibition      | inhibition of acetylcholine                | 3,09E-03 | SST                    | 1 |
| Small Molecule Biochemistry | reduction       | reduction of GTP                           | 3,09E-03 | TAC1                   | 1 |
| Small Molecule Biochemistry | reduction       | reduction of acetylcholine                 | 3,09E-03 | SST                    | 1 |
| Small Molecule Biochemistry | quantity        | quantity of GMP                            | 6,17E-03 | TAC1                   | 1 |
| Small Molecule Biochemistry | quantity        | quantity of prostaglandin D2               | 9,24E-03 | PTGDS                  | 1 |
| Small Molecule Biochemistry | quantity        | quantity of acetylcholine                  | 2,75E-02 | TAC1                   | 1 |
| Small Molecule Biochemistry | quantity        | quantity of L-glutamic acid                | 4,24E-02 | SST                    | 1 |
| Small Molecule Biochemistry | stimulation     | stimulation of dopamine                    | 6,17E-03 | TAC1                   | 1 |
| Small Molecule Biochemistry | accumulation    | accumulation of cyclic AMP                 | 7,20E-03 | IGHM, SST, TAC1        | 3 |
| Small Molecule Biochemistry | binding         | binding of dexamethasone                   | 9,24E-03 | SST                    | 1 |
| Small Molecule Biochemistry | secretion       | secretion of lactic acid                   | 9,24E-03 | TAC1                   | 1 |
| Small Molecule Biochemistry | secretion       | secretion of beta-estradiol                | 3,35E-02 | TAC1                   | 1 |
| Small Molecule Biochemistry | transport       | transport of norepinephrine                | 9,24E-03 | TAC1                   | 1 |
| Small Molecule Biochemistry | induction       | induction of histamine                     | 1,23E-02 | TAC1                   | 1 |
| Small Molecule Biochemistry | formation       | formation of cyclic AMP                    | 1,29E-02 | SST, TAC1              | 2 |
| Small Molecule Biochemistry | synthesis       | synthesis of prostaglandin F2alpha         | 1,54E-02 | IGHM                   | 1 |
| Small Molecule Biochemistry | synthesis       | synthesis of prostaglandin                 | 1,84E-02 | IGHM                   | 1 |

|                  |                                                           |                                                           |          |                                                       |   |
|------------------|-----------------------------------------------------------|-----------------------------------------------------------|----------|-------------------------------------------------------|---|
| Biochemistry     |                                                           | D2                                                        |          |                                                       |   |
| Small Molecule   |                                                           | biosynthesis of chondroitin sulfate                       | 2,45E-02 | CHST13                                                | 1 |
| Biochemistry     | biosynthesis                                              |                                                           |          |                                                       |   |
| Small Molecule   |                                                           | conversion of progesterone                                | 3,05E-02 | TAC1                                                  | 1 |
| Biochemistry     | conversion                                                |                                                           |          |                                                       |   |
| Small Molecule   |                                                           | production of prostaglandin                               | 3,21E-02 | PTGDS, TAC1                                           | 2 |
| Biochemistry     | production                                                |                                                           |          |                                                       |   |
| Small Molecule   |                                                           | catabolism of L-tryptophan                                | 3,35E-02 | CD86                                                  | 1 |
| Biochemistry     | catabolism                                                |                                                           |          |                                                       |   |
| Tissue           |                                                           | generation of cytotoxic T cells                           | 3,32E-04 | CD86, PSMB9                                           | 2 |
| Development      | generation                                                |                                                           |          |                                                       |   |
| Tissue           |                                                           | generation of splenocytes                                 | 9,24E-03 | CD86                                                  | 1 |
| Development      | generation                                                |                                                           |          |                                                       |   |
| Tissue           |                                                           | adhesion of blood cells                                   | 1,66E-03 | CCL19, GZMB, IGHM, RASSF5, TAC1                       | 5 |
| Development      | adhesion                                                  |                                                           |          |                                                       |   |
| Tissue           |                                                           | adhesion of T lymphocytes                                 | 1,92E-03 | CCL19, RASSF5, TAC1                                   | 3 |
| Development      | adhesion                                                  |                                                           |          |                                                       |   |
| Tissue           |                                                           | adhesion of cells                                         | 4,55E-03 | CCL19, GZMB, IGHA1, IGHM, NINJ1, PCDH10, RASSF5, TAC1 | 8 |
| Development      | adhesion                                                  |                                                           |          |                                                       |   |
| Tissue           |                                                           | adhesion of blood platelets                               | 8,14E-03 | GZMB, IGHM                                            | 2 |
| Development      | adhesion                                                  |                                                           |          |                                                       |   |
| Tissue           |                                                           | adhesion of extracellular matrix                          | 4,54E-02 | GZMB                                                  | 1 |
| Development      | adhesion                                                  |                                                           |          |                                                       |   |
| Tissue           |                                                           | accumulation of mononuclear leukocytes                    | 1,99E-03 | CD86, DEF6, PTGDS                                     | 3 |
| Development      | accumulation                                              |                                                           |          |                                                       |   |
| Tissue           |                                                           | accumulation of effector memory T lymphocytes             | 3,09E-03 | DEF6                                                  | 1 |
| Development      | accumulation                                              |                                                           |          |                                                       |   |
| Tissue           |                                                           | accumulation of T lymphocytes                             | 1,21E-02 | CD86, DEF6                                            | 2 |
| Development      | accumulation                                              |                                                           |          |                                                       |   |
| Tissue           |                                                           | accumulation of monocytes                                 | 2,75E-02 | PTGDS                                                 | 1 |
| Development      | accumulation                                              |                                                           |          |                                                       |   |
| Tissue           |                                                           | angiogenesis of synovial membrane                         | 6,17E-03 | TAC1                                                  | 1 |
| Development      | angiogenesis                                              |                                                           |          |                                                       |   |
| Tissue           |                                                           | angiogenesis of tissue                                    | 1,43E-02 | SST, TAC1                                             | 2 |
| Development      | angiogenesis                                              |                                                           |          |                                                       |   |
| Tissue           |                                                           | agglutination of blood platelets                          | 9,24E-03 | IGHM                                                  | 1 |
| Development      | agglutination                                             |                                                           |          |                                                       |   |
| Tissue           |                                                           | activation of nerves                                      | 1,84E-02 | TAC1                                                  | 1 |
| Development      | activation                                                |                                                           |          |                                                       |   |
| Genetic Disorder | lepomatous leprosy                                        | lepomatous leprosy                                        | 4,07E-04 | IGHM, IGK@, IGL@                                      | 3 |
| Genetic Disorder | demyelinating peripheral neuropathy                       | demyelinating peripheral neuropathy of mice               | 3,09E-03 | CD86                                                  | 1 |
| Genetic Disorder | diabetic nephropathy                                      | diabetic nephropathy of mice                              | 3,09E-03 | PTGDS                                                 | 1 |
| Genetic Disorder | epidermodysplasia verruciformis                           | epidermodysplasia verruciformis                           | 6,17E-03 | TMC8                                                  | 1 |
| Genetic Disorder | polycystic lipomembraneous osteodysplasia with sclerosing | polycystic lipomembraneous osteodysplasia with sclerosing |          |                                                       |   |
| Genetic Disorder | leukoencephalopathy                                       | leukoencephalopathy                                       | 6,17E-03 | TYROBP                                                | 1 |
| Genetic Disorder | colitis Aicardi-Goutieres syndrome                        | colitis Aicardi-Goutieres syndrome                        | 7,51E-03 | CD86, CD3E, IGHM                                      | 3 |
| Genetic Disorder | agammaglobulinemia                                        | agammaglobulinemia                                        | 9,24E-03 | RNASEH2C                                              | 1 |
| Genetic Disorder | ulcerative colitis                                        | ulcerative colitis                                        | 1,23E-02 | IGHM                                                  | 1 |
| Genetic Disorder | ventricular tachycardia                                   | ventricular tachycardia of heart                          | 1,25E-02 | CD86, CD3E                                            | 2 |
| Genetic Disorder | psoriatic arthritis                                       | psoriatic arthritis                                       | 1,84E-02 | TAC1                                                  | 1 |
| Genetic Disorder | genetic disorder                                          | genetic disorder of mice                                  | 2,08E-02 | IGHM, IGKC                                            | 2 |
| Genetic Disorder | asthma                                                    | asthma of mice                                            | 2,59E-02 | CD86, GZMB, IGHM, PTGDS, TYROBP                       | 5 |
| Genetic Disorder |                                                           |                                                           | 4,83E-02 | GZMB                                                  | 1 |

|                         |                     |                                                  |          |                                                   |    |
|-------------------------|---------------------|--------------------------------------------------|----------|---------------------------------------------------|----|
| Infectious Disease      | lepomatous leprosy  | lepomatous leprosy                               | 4,07E-04 | IGHM, IGK@, IGL@                                  | 3  |
| Infectious Disease      | infection           | infection of leukocytes                          | 6,12E-03 | RARRES3, TNFRSF14                                 | 2  |
| Infectious Disease      | infection           | infection by Newcastle disease virus             | 6,17E-03 | RARRES3                                           | 1  |
| Infectious Disease      | infection           | infection of T lymphocytes                       | 2,75E-02 | TNFRSF14                                          | 1  |
| Infectious Disease      | infection           | infection by human herpesvirus 1                 | 3,05E-02 | TNFRSF14                                          | 1  |
| Infectious Disease      | infection           | infection of leukocyte cell lines                | 3,95E-02 | CD86                                              | 1  |
| Infectious Disease      | infection           | infection of eukaryotic cells                    | 4,80E-02 | CD86, PPP1R14D, RARRES3, TIMM17B, TNFRSF14, ZNRD1 | 6  |
| Infectious Disease      | infectious disorder | infectious disorder                              | 3,18E-02 | TNFRSF14, ZNRD1                                   | 10 |
| Antigen Presentation    | infiltration        | infiltration by dendritic cells                  | 4,14E-04 | CCL19, CD86                                       | 2  |
| Antigen Presentation    | response            | response of dendritic cells                      | 6,05E-04 | CCL19, RARRES3                                    | 2  |
| Antigen Presentation    | cell movement       | cell movement of dendritic cells                 | 1,06E-03 | CCL19, CD86, TAC1                                 | 3  |
| Antigen Presentation    | migration           | migration of dendritic cells                     | 2,21E-03 | CCL19, CD86, TAC1                                 | 3  |
| Antigen Presentation    | activation          | activation of antigen presenting cells           | 2,23E-03 | CD86, IGHM, PSMB9, TAC1                           | 4  |
| Antigen Presentation    | activation          | activation of B lymphocytes                      | 3,28E-02 | CD86, IGHM                                        | 2  |
| Antigen Presentation    | modulation          | modulation of Kupffer cells                      | 3,09E-03 | SST                                               | 1  |
| Antigen Presentation    | chemoattraction     | chemoattraction of Langerhans cells              | 6,17E-03 | CCL19                                             | 1  |
| Antigen Presentation    | co-localization     | co-localization of antigen presenting cells      | 6,17E-03 | CCL19                                             | 1  |
| Antigen Presentation    | chemotaxis          | chemotaxis of memory B cells                     | 1,23E-02 | CCL19                                             | 1  |
| Antigen Presentation    | chemotaxis          | chemotaxis of dendritic cells                    | 1,25E-02 | CCL19, TAC1                                       | 2  |
| Antigen Presentation    | chemotaxis          | chemotaxis of monocyte-derived dendritic cells   | 1,54E-02 | CCL19                                             | 1  |
| Antigen Presentation    | quantity            | quantity of dendritic cells                      | 1,25E-02 | CCL19, TYROBP                                     | 2  |
| Antigen Presentation    | quantity            | quantity of myeloid dendritic cells              | 2,14E-02 | CCL19                                             | 1  |
| Antigen Presentation    | quantity            | quantity of plasmacytoid dendritic cells         | 3,35E-02 | TYROBP                                            | 1  |
| Antigen Presentation    | proliferation       | proliferation of bone marrow-derived macrophages | 1,84E-02 | TYROBP                                            | 1  |
| Antigen Presentation    | interaction         | interaction of dendritic cells                   | 2,14E-02 | CD86                                              | 1  |
| Antigen Presentation    | transmigration      | transmigration of dendritic cells                | 4,24E-02 | CCL19                                             | 1  |
| Antigen Presentation    | recruitment         | recruitment of dendritic cells                   | 4,54E-02 | CCL19                                             | 1  |
| Humoral Immune Response | response            | response of B lymphocytes                        | 6,05E-04 | CCL19, GZMB                                       | 2  |
| Humoral Immune Response | proliferation       | proliferation of B lymphocytes                   | 3,63E-03 | CD86, CD3E, IGHM, IGKC                            | 4  |
| Humoral Immune Response | proliferation       | proliferation of pro-B lymphocytes               | 4,24E-02 | IGHM                                              | 1  |
| Humoral Immune Response | quantity            | quantity of pre-B lymphocytes                    | 5,51E-03 | IGHM, IGKC                                        | 2  |
| Humoral Immune Response | quantity            | quantity of pre-B1 lymphocytes                   | 1,23E-02 | IGHM                                              | 1  |
| Humoral Immune Response | quantity            | quantity of pre-B2 lymphocytes                   | 1,54E-02 | IGHM                                              | 1  |

|                                           |                                            |                                                         |          |                                           |   |
|-------------------------------------------|--------------------------------------------|---------------------------------------------------------|----------|-------------------------------------------|---|
| Response                                  |                                            | lymphocytes                                             |          |                                           |   |
|                                           |                                            | initiation of cell cycle                                |          |                                           |   |
| Humoral Immune Response                   | cell cycle progression                     | progression of B lymphocytes                            | 6,17E-03 | IGHM                                      | 1 |
| Humoral Immune Response                   | G1 phase                                   | arrest in G1 phase of B lymphocytes                     | 1,23E-02 | IGHM                                      | 1 |
| Humoral Immune Response                   | chemotaxis                                 | chemotaxis of memory B cells                            | 1,23E-02 | CCL19                                     | 1 |
| Humoral Immune Response                   | activation                                 | activation of B lymphocytes                             | 3,28E-02 | CD86, IGHM                                | 2 |
| Humoral Immune Response                   | binding                                    | binding of B lymphocytes                                | 4,83E-02 | CD86                                      | 1 |
| Lymphoid Tissue Structure and Development | proliferation                              | proliferation of lymphatic system cells                 | 8,08E-04 | CD86, IGHM, SST, TAC1                     | 4 |
| Lymphoid Tissue Structure and Development | proliferation                              | proliferation of splenocytes                            | 1,16E-02 | IGHM, SST                                 | 2 |
| Lymphoid Tissue Structure and Development | proliferation                              | proliferation of colony-forming granulocyte-macrophages | 1,23E-02 | TAC1                                      | 1 |
| Lymphoid Tissue Structure and Development | regeneration                               | regeneration of myeloid cells                           | 9,24E-03 | TYROBP                                    | 1 |
| Lymphoid Tissue Structure and Development | expansion                                  | expansion of splenocytes                                | 1,23E-02 | CD3E                                      | 1 |
| Lymphoid Tissue Structure and Development | quantity                                   | quantity of Peyer's patches                             | 3,05E-02 | IGHM                                      | 1 |
| Post-Translational Modification           | dephosphorylation                          | dephosphorylation of protein                            | 8,30E-04 | IGHM, PPP1R14D                            | 2 |
| Post-Translational Modification           | phosphorylation                            | phosphorylation of L-tyrosine                           | 2,21E-03 | CD3E, IGHM, TNFRSF14                      | 3 |
| Post-Translational Modification           | tyrosine phosphorylation                   | tyrosine phosphorylation of protein                     | 3,56E-03 | CD3E, IGHM, TAC1, TYROBP                  | 4 |
| Post-Translational Modification           | moiety attachment                          | moiety attachment of protein                            | 2,50E-02 | CD3E, IGHM, TAC1, TCEB2, TYROBP           | 5 |
| Post-Translational Modification           | modification                               | modification of protein                                 | 4,91E-02 | CD3E, IGHM, PPP1R14D, TAC1, TCEB2, TYROBP | 6 |
| Hematological Disease                     | disease                                    | disease of leukocytes                                   | 9,19E-04 | CD86, RARRES3, TNFRSF14                   | 3 |
| Hematological Disease                     | disease                                    | disease of T lymphocytes                                | 1,09E-03 | CD86, TNFRSF14                            | 2 |
| Hematological Disease                     | disease                                    | disease of dendritic cells                              | 3,95E-02 | RARRES3                                   | 1 |
| Hematological Disease                     | infection                                  | infection of leukocytes                                 | 6,12E-03 | RARRES3, TNFRSF14                         | 2 |
| Hematological Disease                     | infection                                  | infection of T lymphocytes                              | 2,75E-02 | TNFRSF14                                  | 1 |
| Hematological Disease                     | hyperplasia                                | hyperplasia of T lymphocytes                            | 6,17E-03 | CD86                                      | 1 |
| Hematological Disease                     | refractory anemia with ringed sideroblasts | refractory anemia with ringed sideroblasts              | 6,17E-03 | CD86                                      | 1 |
| Hematological Disease                     | T-cell leukemia                            | T-cell leukemia                                         | 7,44E-03 | CD86, CD3E                                | 2 |
| Hematological Disease                     | agammaglobulinemia precursor T-cell        | agammaglobulinemia precursor T-cell                     | 1,23E-02 | IGHM                                      | 1 |
| Hematological Disease                     | lymphoblastic leukemia-lymphoma            | lymphoblastic leukemia-lymphoma of mice                 | 1,23E-02 | CD3E                                      | 1 |
| Hematological Disease                     | leukemogenesis                             | delay in leukemogenesis of mice                         | 1,84E-02 | CD3E                                      | 1 |
| Hematological Disease                     | transient ischemic attack                  | transient ischemic attack                               | 1,84E-02 | PTGDS                                     | 1 |

|                                        |                            |                                                   |          |                         |   |
|----------------------------------------|----------------------------|---------------------------------------------------|----------|-------------------------|---|
| Hematological Disease                  | B-cell leukemia            | B-cell leukemia of mice                           | 2,14E-02 | CD3E                    | 1 |
| Hematological Disease                  | B-cell leukemia            | B-cell leukemia                                   | 4,54E-02 | CD86, CD3E              | 2 |
| Hematological Disease                  | adult T cell leukemia      | adult T cell leukemia                             | 2,14E-02 | CD86                    | 1 |
| Hematological Disease                  | neutrophilia               | neutrophilia of airway                            | 2,14E-02 | DEF6                    | 1 |
| Hematological Disease                  | hypergammaglobulinemia     | hypergammaglobulinemia of mice                    | 2,75E-02 | DEF6                    | 1 |
| Hematological Disease                  | eosinophilia               | eosinophilia of lung                              | 3,05E-02 | CD86                    | 1 |
| Hematological Disease                  | acute lymphocytic leukemia | acute lymphocytic leukemia                        | 3,75E-02 | CD86, CD3E              | 2 |
| Cell Morphology                        | transmembrane potential    | transmembrane potential of mitochondria           | 1,55E-03 | GZMB, IGHM, LGALS2, SST | 4 |
| Cell Morphology                        | transmembrane potential    | transmembrane potential of mitochondrial membrane | 3,36E-03 | GZMB, IGHM              | 2 |
| Cell Morphology                        | intracellular pH           | intracellular pH of breast cancer cell lines      | 3,09E-03 | SST                     | 1 |
| Cell Morphology                        | modulation                 | modulation of Kupffer cells                       | 3,09E-03 | SST                     | 1 |
| Cell Morphology                        | permeabilization           | permeabilization of mitochondria                  | 4,10E-03 | GZMB, SIVA1             | 2 |
| Cell Morphology                        | depolarization             | depolarization of dorsal horn cells               | 6,17E-03 | TAC1                    | 1 |
| Cell Morphology                        | depolarization             | depolarization of ganglion cells                  | 1,23E-02 | TAC1                    | 1 |
| Cell Morphology                        | depolarization             | depolarization of cells                           | 1,25E-02 | SST, TAC1               | 2 |
| Cell Morphology                        | depolarization             | depolarization of muscle cells                    | 1,54E-02 | SST                     | 1 |
| Cell Morphology                        | shrinkage                  | shrinkage of nucleus                              | 6,17E-03 | RARRES3                 | 1 |
| Cell Morphology                        | surface area               | surface area of mesangial cells                   | 6,17E-03 | SST                     | 1 |
| Cell Morphology                        | cell spreading             | cell spreading of blood cells                     | 8,87E-03 | CD3E, GZMB              | 2 |
| Cell Morphology                        | cell spreading             | cell spreading of T lymphocytes                   | 1,84E-02 | CD3E                    | 1 |
| Cell Morphology                        | cell spreading             | cell spreading of blood platelets                 | 3,35E-02 | GZMB                    | 1 |
| Cell Morphology                        | collapse                   | collapse of nucleus                               | 9,24E-03 | GZMB                    | 1 |
| Cell Morphology                        | polarization               | polarization of T lymphocytes                     | 9,63E-03 | CCL19, RASSF5           | 2 |
| Cell Morphology                        | polarization               | polarization of membrane rafts                    | 2,14E-02 | CD86                    | 1 |
| Cell Morphology                        | polarization               | polarization of naive T lymphocytes               | 3,05E-02 | CCL19                   | 1 |
| Cell Morphology                        | blebbing                   | blebbing of plasma membrane                       | 1,23E-02 | TAC1                    | 1 |
| Cell Morphology                        | morphology                 | morphology of keratinocytes                       | 1,23E-02 | RARRES3                 | 1 |
| Cell Morphology                        | morphology                 | morphology of leukemia cell lines                 | 1,54E-02 | TYROBP                  | 1 |
| Cell Morphology                        | extension                  | extension of dendrites                            | 2,14E-02 | CCL19                   | 1 |
| Cell Morphology                        | permeability               | permeability of plasma membrane                   | 2,75E-02 | GZMB                    | 1 |
| Hair and Skin Development and Function | proliferation              | proliferation of epithelial cell lines            | 1,72E-03 | BOP1, RARRES3, TAC1     | 3 |
| Hair and Skin Development and Function | cell viability             | cell viability of keratinocytes                   | 3,09E-03 | RARRES3                 | 1 |
| Hair and Skin Development and          | morphology                 | morphology of keratinocytes                       | 1,23E-02 | RARRES3                 | 1 |



| Function                               |                          |                                                      |          |                                               |   |
|----------------------------------------|--------------------------|------------------------------------------------------|----------|-----------------------------------------------|---|
| Hair and Skin Development and Function | quantity                 | quantity of keratinocytes                            | 3,05E-02 | RARRES3<br>CCL19, CD3E, IGHM, IGKC, SST, TAC1 | 1 |
| Cell Signaling                         | quantity                 | quantity of calcium                                  | 2,12E-03 | TAC1                                          | 6 |
| Cell Signaling                         | density                  | density of Ca2+                                      | 3,09E-03 | CD3E                                          | 1 |
| Cell Signaling                         | density                  | density of calcium                                   | 3,09E-03 | CD3E                                          | 1 |
| Cell Signaling                         | reduction                | reduction of GTP tyrosine phosphorylation of protein | 3,09E-03 | TAC1                                          | 1 |
| Cell Signaling                         | tyrosine phosphorylation |                                                      | 3,56E-03 | CD3E, IGHM, TAC1, TYROBP                      | 4 |
| Cell Signaling                         | mobilization             | mobilization of calcium                              | 5,18E-03 | CCL19, CD3E, DEF6, TAC1, TYROBP               | 5 |
| Cell Signaling                         | mobilization             | mobilization of Ca2+                                 | 1,07E-02 | CD3E, TAC1, TYROBP                            | 3 |
| Cell Signaling                         | inhibition               | inhibition of calcium                                | 6,17E-03 | SST                                           | 1 |
| Cell Signaling                         | flux                     | flux of calcium                                      | 7,19E-03 | CCL19, CD3E, IGHM, SST                        | 4 |
| Cell Signaling                         | accumulation             | accumulation of cyclic AMP                           | 7,20E-03 | IGHM, SST, TAC1                               | 3 |
| Cell Signaling                         | formation                | formation of cyclic AMP                              | 1,29E-02 | SST, TAC1                                     | 2 |
| Cell Signaling                         | transduction             | transduction of calcium                              | 2,14E-02 | CD3E                                          | 1 |
| Cell Signaling                         | release                  | release of cyclic AMP                                | 2,75E-02 | SST                                           | 1 |
| Cell Signaling                         | regulation               | regulation of calcium                                | 3,95E-02 | SST                                           | 1 |
| Vitamin and Mineral Metabolism         | quantity                 | quantity of calcium                                  | 2,12E-03 | CCL19, CD3E, IGHM, IGKC, SST, TAC1            | 6 |
| Vitamin and Mineral Metabolism         | density                  | density of Ca2+                                      | 3,09E-03 | CD3E                                          | 1 |
| Vitamin and Mineral Metabolism         | density                  | density of calcium                                   | 3,09E-03 | CD3E                                          | 1 |
| Vitamin and Mineral Metabolism         | mobilization             | mobilization of calcium                              | 5,18E-03 | CCL19, CD3E, DEF6, TAC1, TYROBP               | 5 |
| Vitamin and Mineral Metabolism         | mobilization             | mobilization of Ca2+                                 | 1,07E-02 | CD3E, TAC1, TYROBP                            | 3 |
| Vitamin and Mineral Metabolism         | inhibition               | inhibition of calcium                                | 6,17E-03 | SST                                           | 1 |
| Vitamin and Mineral Metabolism         | flux                     | flux of calcium                                      | 7,19E-03 | CCL19, CD3E, IGHM, SST                        | 4 |
| Vitamin and Mineral Metabolism         | transduction             | transduction of calcium                              | 2,14E-02 | CD3E                                          | 1 |
| Vitamin and Mineral Metabolism         | regulation               | regulation of calcium phosphorylation of L-tyrosine  | 3,95E-02 | SST                                           | 1 |
| Amino Acid Metabolism                  | phosphorylation          |                                                      | 2,21E-03 | CD3E, IGHM, TNFRSF14                          | 3 |
| Amino Acid Metabolism                  | release                  | release of glycine                                   | 3,09E-03 | TAC1                                          | 1 |
| Amino Acid Metabolism                  | catabolism               | catabolism of L-tryptophan                           | 3,35E-02 | CD86                                          | 1 |
| Amino Acid Metabolism                  | quantity                 | quantity of L-glutamic acid                          | 4,24E-02 | SST                                           | 1 |
| Carbohydrate Metabolism                | co-localization          | co-localization of phosphatidylserine                | 3,09E-03 | IGHM                                          | 1 |
| Carbohydrate Metabolism                | biosynthesis             | biosynthesis of chondroitin sulfate                  | 2,45E-02 | CHST13                                        | 1 |
| Carbohydrate                           | glycogenolysis           | glycogenolysis                                       | 3,05E-02 | SST                                           | 1 |

Metabolism

|                                            |                        |                                                           |          |                         |   |
|--------------------------------------------|------------------------|-----------------------------------------------------------|----------|-------------------------|---|
| Cell Cycle                                 | mitosis                | mitosis of synovial cells                                 | 3,09E-03 | TAC1                    | 1 |
| Cell Cycle                                 | mitosis                | mitosis of fibroblasts                                    | 1,84E-02 | TAC1                    | 1 |
| Cell Cycle                                 | mitosis                | mitosis of smooth muscle cells                            | 3,65E-02 | TAC1                    | 1 |
| Cell Cycle                                 | cell cycle progression | delay in cell cycle progression of carcinoma cell lines   | 6,17E-03 | RASSF5                  | 1 |
| Cell Cycle                                 | cell cycle progression | delay in cell cycle progression of lung cancer cell lines | 6,17E-03 | RASSF5                  | 1 |
| Cell Cycle                                 | cell cycle progression | initiation of cell cycle progression of B lymphocytes     | 6,17E-03 | IGHM                    | 1 |
| Cell Cycle                                 | cell cycle progression | cell cycle progression of lymphocytes                     | 9,25E-03 | CD3E, IGHM              | 2 |
| Cell Cycle                                 | cell cycle progression | entry into cell cycle progression of endocrine cell lines | 1,84E-02 | SST                     | 1 |
| Cell Cycle                                 | cell cycle progression | cell cycle progression of eukaryotic cells                | 2,84E-02 | CD3E, IGHM, RASSF5, SST | 4 |
| Cell Cycle                                 | cell cycle progression | arrest in cell cycle progression of lymphoma cell lines   | 3,65E-02 | IGHM                    | 1 |
| Cell Cycle                                 | cell cycle progression | cell cycle progression of cell lines                      | 4,74E-02 | IGHM, RASSF5, SST       | 3 |
| Cell Cycle                                 | G1 phase               | arrest in G1 phase of B lymphocytes                       | 1,23E-02 | IGHM                    | 1 |
| Cell Cycle                                 | G1 phase               | arrest in G1 phase of lymphoma cell lines                 | 3,65E-02 | IGHM                    | 1 |
| Cellular Assembly and Organization         | polymerization         | polymerization of actin cytoskeleton                      | 3,09E-03 | CD3E                    | 1 |
| Cellular Assembly and Organization         | perturbation           | perturbation of mitochondria                              | 6,17E-03 | GZMB                    | 1 |
| Cellular Assembly and Organization         | shrinkage              | shrinkage of nucleus                                      | 6,17E-03 | RARRES3                 | 1 |
| Cellular Assembly and Organization         | rearrangement          | rearrangement of microtubule organizing centers           | 1,23E-02 | CD3E                    | 1 |
| Cellular Assembly and Organization         | biogenesis             | biogenesis of plasma membrane                             | 1,54E-02 | SERP1                   | 1 |
| Cellular Assembly and Organization         | biogenesis             | biogenesis of protein-RNA complex                         | 2,45E-02 | BOP1                    | 1 |
| Cellular Assembly and Organization         | extension              | extension of dendrites                                    | 2,14E-02 | CCL19                   | 1 |
| Cellular Assembly and Organization         | formation              | formation of membrane blebs                               | 2,14E-02 | TAC1                    | 1 |
| Cellular Assembly and Organization         | formation              | formation of immunological synapses                       | 3,95E-02 | DEF6                    | 1 |
| Cellular Assembly and Organization         | polarization           | polarization of membrane rafts                            | 2,14E-02 | CD86                    | 1 |
| Cellular Assembly and Organization         | permeability           | permeability of plasma membrane                           | 2,75E-02 | GZMB                    | 1 |
| Cellular Assembly and Organization         | activation             | activation of mitochondria                                | 3,35E-02 | IGHM                    | 1 |
| Cellular Assembly and Organization         | transport              | transport of sorting endosomes                            | 3,35E-02 | IGHM                    | 1 |
| Cellular Assembly and Organization         | organization           | organization of actin stress fibers                       | 3,95E-02 | ARHGAP4                 | 1 |
| Connective Tissue Development and Function | mitosis                | mitosis of synovial cells                                 | 3,09E-03 | TAC1                    | 1 |
| Connective Tissue Development and          | mitosis                | mitosis of fibroblasts                                    | 1,84E-02 | TAC1                    | 1 |

| Function                                   |                      |                                                                      |          |             |   |
|--------------------------------------------|----------------------|----------------------------------------------------------------------|----------|-------------|---|
| Connective Tissue Development and Function | reconstitution       | reconstitution of osteoclasts                                        | 3,09E-03 | TYROBP      | 1 |
| Connective Tissue Development and Function | angiogenesis         | angiogenesis of synovial membrane                                    | 6,17E-03 | TAC1        | 1 |
| Connective Tissue Development and Function | activation           | activation of synovial cells                                         | 1,54E-02 | TAC1        | 1 |
| Connective Tissue Development and Function | activation           | activation of fibroblast cell lines                                  | 2,75E-02 | CD3E        | 1 |
| Connective Tissue Development and Function | maturation           | maturation of osteoclasts                                            | 2,75E-02 | TYROBP      | 1 |
| DNA Replication, Recombination, and Repair | allelic exclusion    | allelic exclusion of DNA                                             | 3,09E-03 | IGHM        | 1 |
| DNA Replication, Recombination, and Repair | fragmentation        | fragmentation of DNA fragment                                        | 1,54E-02 | GZMB        | 1 |
| DNA Replication, Recombination, and Repair | nicking              | nicking of DNA                                                       | 3,95E-02 | GZMB        | 1 |
| Digestive System Development and Function  | contraction          | contraction of circular muscle layer                                 | 3,09E-03 | TAC1        | 1 |
| Digestive System Development and Function  | proliferation        | proliferation of colon cell lines                                    | 6,17E-03 | TAC1        | 1 |
| Digestive System Development and Function  | relaxation           | relaxation of caudad compartment                                     | 9,24E-03 | SST         | 1 |
| Endocrine System Disorders                 | diabetic nephropathy | diabetic nephropathy of mice                                         | 3,09E-03 | PTGDS       | 1 |
| Endocrine System Disorders                 | diabetes mellitus    | onset of diabetes mellitus of mice                                   | 2,45E-02 | CD86        | 1 |
| Endocrine System Disorders                 | diabetes mellitus    | diabetes mellitus of mice                                            | 4,03E-02 | CD86, PTGDS | 2 |
| Infection Mechanism                        | infectivity          | encephalomyocarditis virus infectivity of vesicular stomatitis virus | 3,09E-03 | RARRES3     | 1 |
| Infection Mechanism                        | infectivity          | replication of Zaire ebolavirus - Mayinga (Zaire, 1976)              | 6,17E-03 | RARRES3     | 1 |
| Infection Mechanism                        | replication          | replication of encephalomyocarditis virus                            | 3,09E-03 | RARRES3     | 1 |
| Infection Mechanism                        | replication          | replication of HIV                                                   | 2,45E-02 | RARRES3     | 1 |
| Infection Mechanism                        | replication          | replication of HIV                                                   | 2,96E-02 | IGKC, TAC1  | 2 |
| Infection Mechanism                        | entrance             | entrance of human herpesvirus 1                                      | 6,17E-03 | TNFRSF14    | 1 |
| Infection Mechanism                        | entrance             | entrance of human herpesvirus 2                                      | 6,17E-03 | TNFRSF14    | 1 |
| Infection Mechanism                        | infection            | infection by Newcastle disease virus                                 | 6,17E-03 | RARRES3     | 1 |
| Infection Mechanism                        | infection            | infection by human herpesvirus 1                                     | 6,17E-03 | RARRES3     | 1 |
| Infection Mechanism                        | infection            | infection by human herpesvirus 1                                     | 3,05E-02 | TNFRSF14    | 1 |
| Infection Mechanism                        | viral entry          | viral entry by human herpesvirus 1                                   | 6,17E-03 | TNFRSF14    | 1 |
| Infection Mechanism                        | quantity             | quantity of Murine cytomegalovirus                                   | 6,17E-03 | TNFRSF14    | 1 |
| Infection Mechanism                        | quantity             | co-localization of phosphatidylserine                                | 1,54E-02 | TYROBP      | 1 |
| Lipid Metabolism                           | co-localization      | phosphatidylserine                                                   | 3,09E-03 | IGHM        | 1 |

|                                         |                      |                                                     |          |             |   |
|-----------------------------------------|----------------------|-----------------------------------------------------|----------|-------------|---|
| Lipid Metabolism                        | co-localization      | co-localization of ganglioside GM1                  | 6,17E-03 | IGHM        | 1 |
| Lipid Metabolism                        | binding              | binding of dexamethasone quantity of prostaglandin  | 9,24E-03 | SST         | 1 |
| Lipid Metabolism                        | quantity             | D2                                                  | 9,24E-03 | PTGDS       | 1 |
| Lipid Metabolism                        | synthesis            | synthesis of prostaglandin F2alpha                  | 1,54E-02 | IGHM        | 1 |
| Lipid Metabolism                        | synthesis            | synthesis of prostaglandin D2                       | 1,84E-02 | IGHM        | 1 |
| Lipid Metabolism                        | conversion           | conversion of progesterone production of            | 3,05E-02 | TAC1        | 1 |
| Lipid Metabolism                        | production           | prostaglandin                                       | 3,21E-02 | PTGDS, TAC1 | 2 |
| Lipid Metabolism                        | secretion            | secretion of beta-estradiol diabetic nephropathy of | 3,35E-02 | TAC1        | 1 |
| Metabolic Disease                       | diabetic nephropathy | mice                                                | 3,09E-03 | PTGDS       | 1 |
| Metabolic Disease                       | macroalbuminuria     | macroalbuminuria onset of diabetes mellitus         | 9,24E-03 | PTGDS       | 1 |
| Metabolic Disease                       | diabetes mellitus    | of mice                                             | 2,45E-02 | CD86        | 1 |
| Metabolic Disease                       | diabetes mellitus    | diabetes mellitus of mice                           | 4,03E-02 | CD86, PTGDS | 2 |
| Metabolic Disease                       | microalbuminuria     | microalbuminuria                                    | 3,05E-02 | PTGDS       | 1 |
| Nervous System Development and Function | development          | arrest in development of oligodendrocytes           | 3,09E-03 | TYROBP      | 1 |
| Nervous System Development and Function | analgesia            | analgesia of spinal cord                            | 6,17E-03 | TAC1        | 1 |
| Nervous System Development and Function | depolarization       | depolarization of dorsal horn cells                 | 6,17E-03 | TAC1        | 1 |
| Nervous System Development and Function | depolarization       | depolarization of ganglion cells                    | 1,23E-02 | TAC1        | 1 |
| Nervous System Development and Function | flexor reflex        | flexor reflex of hindlimb                           | 6,17E-03 | TAC1        | 1 |
| Nervous System Development and Function | neurogenesis         | neurogenesis of neuronal progenitor cells           | 1,23E-02 | GZMB        | 1 |
| Nervous System Development and Function | size                 | size of adenohypophysis                             | 1,23E-02 | SERP1       | 1 |
| Nervous System Development and Function | activation           | activation of nerves                                | 1,84E-02 | TAC1        | 1 |
| Nervous System Development and Function | extension            | extension of dendrites                              | 2,14E-02 | CCL19       | 1 |
| Nervous System Development and Function | guidance             | guidance of normal cells                            | 2,14E-02 | CCL19       | 1 |
| Nervous System Development and Function | stimulation          | stimulation of astrocytes                           | 2,14E-02 | TAC1        | 1 |
| Nervous System Development and Function | stimulation          | stimulation of neurons                              | 4,54E-02 | TAC1        | 1 |
| Nervous System Development and Function | nociception          | nociception by rats                                 | 2,75E-02 | TAC1        | 1 |
| Nervous System Development and Function | quantity             | quantity of microglia                               | 3,35E-02 | TYROBP      | 1 |

|                                              |                                                                               |                                                                               |          |                                          |   |
|----------------------------------------------|-------------------------------------------------------------------------------|-------------------------------------------------------------------------------|----------|------------------------------------------|---|
| Nervous System Development and Function      | chemotaxis                                                                    | chemotaxis of nervous tissue cell lines                                       | 3,65E-02 | CCL19                                    | 1 |
| Neurological Disease                         | demyelinating peripheral neuropathy                                           | demyelinating peripheral neuropathy of mice                                   | 3,09E-03 | CD86                                     | 1 |
| Neurological Disease                         | hypomyelination                                                               | hypomyelination of brain                                                      | 3,09E-03 | TYROBP                                   | 1 |
| Neurological Disease                         | hypomyelination                                                               | hypomyelination of thalamus                                                   | 3,09E-03 | TYROBP                                   | 1 |
| Neurological Disease                         | polycystic lipomembraneous osteodysplasia with sclerosing leukoencephalopathy | polycystic lipomembraneous osteodysplasia with sclerosing leukoencephalopathy | 6,17E-03 | TYROBP                                   | 1 |
| Neurological Disease                         | Aicardi-Goutieres syndrome                                                    | Aicardi-Goutieres syndrome                                                    | 9,24E-03 | RNASEH2C                                 | 1 |
| Neurological Disease                         | experimental autoimmune encephalomyelitis                                     | experimental autoimmune encephalomyelitis of rodents                          | 1,17E-02 | CD86, TNFRSF14, TYROBP                   | 3 |
| Neurological Disease                         | experimental autoimmune encephalomyelitis                                     | experimental autoimmune encephalomyelitis of rats                             | 3,95E-02 | TNFRSF14                                 | 1 |
| Neurological Disease                         | experimental autoimmune myasthenia gravis                                     | experimental autoimmune myasthenia gravis of mice                             | 1,84E-02 | CD86                                     | 1 |
| Neurological Disease                         | transient ischemic attack                                                     | transient ischemic attack                                                     | 1,84E-02 | PTGDS                                    | 1 |
| Neurological Disease                         | neurological disorder                                                         | neurological disorder of rodents                                              | 2,27E-02 | CD86, PTGDS, TAC1, TNFRSF14, TYROBP      | 5 |
| Neurological Disease                         | neurological disorder                                                         | neurological disorder of mammalia                                             | 2,79E-02 | CD86, PTGDS, SST, TAC1, TNFRSF14, TYROBP | 6 |
| Neurological Disease                         | encephalopathy                                                                | encephalopathy of mice                                                        | 2,44E-02 | CD86, TAC1, TYROBP                       | 3 |
| Neurological Disease                         | allodynia                                                                     | allodynia of mice                                                             | 4,54E-02 | PTGDS                                    | 1 |
| Nucleic Acid Metabolism                      | reduction                                                                     | reduction of GTP                                                              | 3,09E-03 | TAC1                                     | 1 |
| Nucleic Acid Metabolism                      | quantity                                                                      | quantity of GMP                                                               | 6,17E-03 | TAC1                                     | 1 |
| Nucleic Acid Metabolism                      | accumulation                                                                  | accumulation of cyclic AMP                                                    | 7,20E-03 | IGHM, SST, TAC1                          | 3 |
| Nucleic Acid Metabolism                      | formation                                                                     | formation of cyclic AMP                                                       | 1,29E-02 | SST, TAC1                                | 2 |
| Nucleic Acid Metabolism                      | release                                                                       | release of cyclic AMP                                                         | 2,75E-02 | SST                                      | 1 |
| Organ Morphology                             | contraction                                                                   | contraction of circular muscle layer                                          | 3,09E-03 | TAC1                                     | 1 |
| Organ Morphology                             | contraction                                                                   | contraction of urinary bladder                                                | 1,54E-02 | TAC1                                     | 1 |
| Organ Morphology                             | focal necrosis                                                                | focal necrosis of liver                                                       | 3,09E-03 | TYROBP                                   | 1 |
| Protein Synthesis                            | aminoacylation                                                                | aminoacylation of L-tryptophanyl-tRNA(Trp)                                    | 3,09E-03 | WARS                                     | 1 |
| Renal and Urological Disease                 | diabetic nephropathy                                                          | diabetic nephropathy of mice                                                  | 3,09E-03 | PTGDS                                    | 1 |
| Renal and Urological Disease                 | macroalbuminuria                                                              | macroalbuminuria                                                              | 9,24E-03 | PTGDS                                    | 1 |
| Renal and Urological Disease                 | microalbuminuria                                                              | microalbuminuria                                                              | 3,05E-02 | PTGDS                                    | 1 |
| Respiratory System Development and Function  | proliferation                                                                 | proliferation of bronchoalveolar lavage cells                                 | 3,09E-03 | HLA-DPB1                                 | 1 |
| Respiratory System Development and Function  | migration                                                                     | migration of lung cell lines                                                  | 3,95E-02 | SST                                      | 1 |
| Skeletal and Muscular System Development and | contraction                                                                   | contraction of bronchial smooth muscle                                        | 3,09E-03 | TAC1                                     | 1 |

|                                                       |                                           |                                                   |          |                                                                                      |    |
|-------------------------------------------------------|-------------------------------------------|---------------------------------------------------|----------|--------------------------------------------------------------------------------------|----|
| Function                                              |                                           |                                                   |          |                                                                                      |    |
| Skeletal and Muscular System Development and Function | contraction                               | contraction of circular muscle layer              | 3,09E-03 | TAC1                                                                                 | 1  |
| Skeletal and Muscular System Development and Function | reconstitution                            | reconstitution of osteoclasts                     | 3,09E-03 | TYROBP                                                                               | 1  |
| Skeletal and Muscular System Development and Function | angiogenesis                              | angiogenesis of synovial membrane                 | 6,17E-03 | TAC1                                                                                 | 1  |
| Skeletal and Muscular System Development and Function | flexor reflex                             | flexor reflex of hindlimb                         | 6,17E-03 | TAC1                                                                                 | 1  |
| Skeletal and Muscular System Development and Function | depolarization                            | depolarization of smooth muscle                   | 9,24E-03 | TAC1                                                                                 | 1  |
| Skeletal and Muscular System Development and Function | depolarization                            | depolarization of muscle cells                    | 1,54E-02 | SST                                                                                  | 1  |
| Skeletal and Muscular System Development and Function | maturation                                | maturation of osteoclasts                         | 2,75E-02 | TYROBP                                                                               | 1  |
| Skeletal and Muscular System Development and Function | mitosis                                   | mitosis of smooth muscle cells                    | 3,65E-02 | TAC1                                                                                 | 1  |
| Skeletal and Muscular System Development and Function | proliferation                             | proliferation of myoblasts                        | 4,24E-02 | STRA13                                                                               | 1  |
| Connective Tissue Disorders                           | systemic juvenile idiopathic arthritis    | systemic juvenile idiopathic arthritis            | 3,60E-03 | CD86, IGKC                                                                           | 2  |
| Connective Tissue Disorders                           | arthritis                                 | arthritis                                         | 7,17E-03 | LST1, PSMB9, PTGDS, TAC1                                                             | 13 |
| Connective Tissue Disorders                           | rheumatoid arthritis                      | rheumatoid arthritis                              | 1,81E-02 | ADAP2, CCL19, CD86, DEF6, GZMB, HLA-DPB1, IGHM, IGKC, IGL@, PSMB9, TAC1              | 11 |
| Connective Tissue Disorders                           | rheumatoid arthritis                      | rheumatoid arthritis of mice                      | 4,24E-02 | DEF6                                                                                 | 1  |
| Connective Tissue Disorders                           | psoriatic arthritis                       | psoriatic arthritis                               | 2,08E-02 | IGHM, IGKC                                                                           | 2  |
| Skeletal and Muscular Disorders                       | systemic juvenile idiopathic arthritis    | systemic juvenile idiopathic arthritis            | 3,60E-03 | CD86, IGKC                                                                           | 2  |
| Skeletal and Muscular Disorders                       | arthritis                                 | arthritis                                         | 7,17E-03 | ADAP2, CCL19, CD86, DEF6, GZMB, HLA-DPB1, IGHM, IGKC, IGL@, LST1, PSMB9, PTGDS, TAC1 | 13 |
| Skeletal and Muscular Disorders                       | rheumatoid arthritis                      | rheumatoid arthritis                              | 1,81E-02 | ADAP2, CCL19, CD86, DEF6, GZMB, HLA-DPB1, IGHM, IGL@, LST1, PSMB9, TAC1              | 11 |
| Skeletal and Muscular Disorders                       | rheumatoid arthritis                      | rheumatoid arthritis of mice                      | 4,24E-02 | DEF6                                                                                 | 1  |
| Skeletal and Muscular Disorders                       | experimental autoimmune myasthenia gravis | experimental autoimmune myasthenia gravis of mice | 1,84E-02 | CD86                                                                                 | 1  |
| Skeletal and Muscular Disorders                       | psoriatic arthritis                       | psoriatic arthritis                               | 2,08E-02 | IGHM, IGKC                                                                           | 2  |
| Cancer                                                | hyperplasia                               | hyperplasia of T lymphocytes                      | 6,17E-03 | CD86                                                                                 | 1  |

|                                                |                                                                  |                                                                          |          |                                                                                                              |    |
|------------------------------------------------|------------------------------------------------------------------|--------------------------------------------------------------------------|----------|--------------------------------------------------------------------------------------------------------------|----|
| Cancer                                         | quantity refractory anemia with ringed sideroblasts              | quantity of uterine tumor refractory anemia with ringed sideroblasts     | 6,17E-03 | PSMB9                                                                                                        | 1  |
| Cancer                                         | T-cell leukemia precursor T-cell lymphoblastic leukemia-lymphoma | T-cell leukemia precursor T-cell lymphoblastic leukemia-lymphoma of mice | 7,44E-03 | CD86, CD3E                                                                                                   | 2  |
| Cancer                                         | leukemogenesis                                                   | delay in leukemogenesis of mice                                          | 1,23E-02 | CD3E                                                                                                         | 1  |
| Cancer                                         | B-cell leukemia                                                  | B-cell leukemia of mice                                                  | 1,84E-02 | CD3E                                                                                                         | 1  |
| Cancer                                         | B-cell leukemia                                                  | B-cell leukemia                                                          | 2,14E-02 | CD3E                                                                                                         | 1  |
| Cancer                                         | adult T cell leukemia                                            | adult T cell leukemia                                                    | 4,54E-02 | CD86, CD3E                                                                                                   | 2  |
| Cancer                                         | development                                                      | development of skin tumor                                                | 2,14E-02 | CD86                                                                                                         | 1  |
| Cancer                                         | oral cancer acute lymphocytic leukemia                           | oral cancer acute lymphocytic leukemia                                   | 2,45E-02 | CD86                                                                                                         | 1  |
| Cancer                                         | oral cancer acute lymphocytic leukemia                           | oral cancer acute lymphocytic leukemia                                   | 3,41E-02 | CCL19, TYROBP                                                                                                | 2  |
| Cancer                                         | oral cancer acute lymphocytic leukemia                           | oral cancer acute lymphocytic leukemia                                   | 3,75E-02 | CD86, CD3E                                                                                                   | 2  |
| Cancer                                         | cancer                                                           | cancer                                                                   | 4,67E-02 | C17ORF81, CCL19, CD86, CD3E, GZMB, IGHM, IGKC, IGL@, LAGE3, PSMB9, PTGDS, RASSF5, STRA13, TARP, TYROBP, WARS | 16 |
| Cardiovascular Disease                         | vasculitis                                                       | vasculitis of blood vessel                                               | 6,17E-03 | DEF6                                                                                                         | 1  |
| Cardiovascular Disease                         | vasculitis                                                       | vasculitis                                                               | 7,78E-03 | CD86, DEF6                                                                                                   | 2  |
| Cardiovascular Disease                         | transient ischemic attack                                        | transient ischemic attack                                                | 1,84E-02 | PTGDS                                                                                                        | 1  |
| Cardiovascular Disease                         | ventricular tachycardia                                          | ventricular tachycardia of heart                                         | 1,84E-02 | TAC1                                                                                                         | 1  |
| Cardiovascular Disease                         | Wegener's granulomatosis                                         | Wegener's granulomatosis                                                 | 2,75E-02 | CD86                                                                                                         | 1  |
| Cardiovascular System Development and Function | angiogenesis                                                     | angiogenesis of synovial membrane                                        | 6,17E-03 | TAC1                                                                                                         | 1  |
| Cardiovascular System Development and Function | angiogenesis                                                     | angiogenesis of tissue                                                   | 1,43E-02 | SST, TAC1                                                                                                    | 2  |
| Cardiovascular System Development and Function | angiogenesis                                                     | angiogenesis of retina                                                   | 1,84E-02 | WARS                                                                                                         | 1  |
| Cardiovascular System Development and Function | permeability                                                     | permeability of venular capillary                                        | 6,17E-03 | TAC1                                                                                                         | 1  |
| Cardiovascular System Development and Function | formation                                                        | formation of neovessel                                                   | 1,23E-02 | CD3E                                                                                                         | 1  |
| Cardiovascular System Development and Function | relaxation                                                       | relaxation of pulmonary artery                                           | 1,54E-02 | TAC1                                                                                                         | 1  |
| Cardiovascular System Development and Function | relaxation                                                       | relaxation of coronary artery                                            | 2,45E-02 | TAC1                                                                                                         | 1  |
| Cardiovascular System Development and Function | contraction                                                      | contraction of portal vein                                               | 2,14E-02 | TAC1                                                                                                         | 1  |

|                             |                        |                                                           |          |                   |   |
|-----------------------------|------------------------|-----------------------------------------------------------|----------|-------------------|---|
| Cardiovascular System       |                        |                                                           |          |                   |   |
| Development and Function    | stimulation            | stimulation of endothelial cells                          | 3,35E-02 | TAC1              | 1 |
| Cardiovascular System       |                        |                                                           |          |                   |   |
| Development and Function    | end diastolic pressure | end diastolic pressure of left ventricle                  | 4,54E-02 | TAC1              | 1 |
| Drug Metabolism             | stimulation            | stimulation of dopamine                                   | 6,17E-03 | TAC1              | 1 |
| Drug Metabolism             | binding                | binding of dexamethasone                                  | 9,24E-03 | SST               | 1 |
| Drug Metabolism             | transport              | transport of norepinephrine                               | 9,24E-03 | TAC1              | 1 |
| Drug Metabolism             | conversion             | conversion of progesterone                                | 3,05E-02 | TAC1              | 1 |
| Drug Metabolism             | secretion              | secretion of beta-estradiol                               | 3,35E-02 | TAC1              | 1 |
| Organismal Development      | angiogenesis           | angiogenesis of synovial membrane                         | 6,17E-03 | TAC1              | 1 |
| Organismal Development      | angiogenesis           | angiogenesis of tissue                                    | 1,43E-02 | SST, TAC1         | 2 |
| Organismal Development      | angiogenesis           | angiogenesis of retina                                    | 1,84E-02 | WARS              | 1 |
| Organismal Development      | formation              | formation of neovessel                                    | 1,23E-02 | CD3E              | 1 |
| Gastrointestinal Disease    | colitis                | colitis                                                   | 7,51E-03 | CD86, CD3E, IGHM  | 3 |
| Gastrointestinal Disease    | ulcerative colitis     | ulcerative colitis                                        | 1,25E-02 | CD86, CD3E        | 2 |
| Antimicrobial Response      | elimination            | elimination of Murine cytomegalovirus                     | 9,24E-03 | GZMB              | 1 |
| Antimicrobial Response      | antiviral response     | antiviral response of organism                            | 2,14E-02 | CCL19, RARRES3    | 2 |
| Antimicrobial Response      | antiviral response     | antiviral response of mammalia                            | 3,65E-02 | RARRES3           | 1 |
| Antimicrobial Response      | immune protection      | immune protection of mice                                 | 2,14E-02 | IGHM              | 1 |
| Endocrine System            |                        |                                                           |          |                   |   |
| Development and Function    | binding                | binding of dexamethasone                                  | 9,24E-03 | SST               | 1 |
| Endocrine System            |                        |                                                           |          |                   |   |
| Development and Function    | cell cycle progression | entry into cell cycle progression of endocrine cell lines | 1,84E-02 | SST               | 1 |
| Endocrine System            |                        |                                                           |          |                   |   |
| Development and Function    | conversion             | conversion of progesterone                                | 3,05E-02 | TAC1              | 1 |
| Endocrine System            |                        |                                                           |          |                   |   |
| Development and Function    | secretion              | secretion of beta-estradiol                               | 3,35E-02 | TAC1              | 1 |
| Protein Trafficking         | secretion              | secretion of antibody                                     | 1,23E-02 | IGHM              | 1 |
| Tumor Morphology            | volume                 | volume of tumor tissue                                    | 1,23E-02 | CCL19             | 1 |
| Tumor Morphology            | cytolysis              | cytolysis of tumor cells                                  | 3,95E-02 | GZMB              | 1 |
| Tumor Morphology            | rejection              | rejection of tumor                                        | 3,95E-02 | CD86              | 1 |
| Renal and Urological System |                        |                                                           |          |                   |   |
| Development and Function    | contraction            | contraction of urinary bladder                            | 1,54E-02 | TAC1              | 1 |
| Respiratory Disease         | respiratory disorder   | respiratory disorder of mice                              | 1,70E-02 | CCL19, CD86, GZMB | 3 |
| Respiratory Disease         | neutrophilia           | neutrophilia of airway                                    | 2,14E-02 | DEF6              | 1 |
| Respiratory Disease         | eosinophilia           | eosinophilia of lung                                      | 3,05E-02 | CD86              | 1 |
| Respiratory Disease         | hyperreactivity        | hyperreactivity of airway                                 | 3,05E-02 | CD86              | 1 |



|                                              |                  |                                                         |          |           |   |
|----------------------------------------------|------------------|---------------------------------------------------------|----------|-----------|---|
| Respiratory Disease                          | asthma           | asthma of mice                                          | 4,83E-02 | GZMB      | 1 |
| Organ Development                            | angiogenesis     | angiogenesis of retina                                  | 1,84E-02 | WARS      | 1 |
| Visual System Development and Function       | angiogenesis     | angiogenesis of retina                                  | 1,84E-02 | WARS      | 1 |
| Hypersensitivity Response                    | stimulation      | stimulation of mast cells                               | 2,14E-02 | TAC1      | 1 |
| Organismal Injury and Abnormalities          | edema            | edema of paw                                            | 2,14E-02 | SST       | 1 |
| Organismal Injury and Abnormalities          | edema            | edema of skin                                           | 3,05E-02 | TAC1      | 1 |
| Organismal Injury and Abnormalities          | neutrophilia     | neutrophilia of airway                                  | 2,14E-02 | DEF6      | 1 |
| Organismal Injury and Abnormalities          | hyperreactivity  | hyperreactivity of airway                               | 3,05E-02 | CD86      | 1 |
| Organismal Injury and Abnormalities          | pain             | pain of mice                                            | 4,24E-02 | TAC1      | 1 |
| Organismal Injury and Abnormalities          | tumor tissue     | tumor tissue                                            | 4,83E-02 | CCL19     | 1 |
| Nutritional Disease                          | wasting syndrome | wasting syndrome of mice                                | 2,75E-02 | CD86      | 1 |
| Behavior                                     | anxiety          | anxiety of rats                                         | 3,35E-02 | TAC1      | 1 |
| Reproductive System Development and Function | ejaculation      | ejaculation                                             | 3,35E-02 | TAC1      | 1 |
| Gene Expression                              | transcription    | transcription of AP1 response element                   | 3,65E-02 | CD3E      | 1 |
| Gene Expression                              | transcription    | transcription of interferon-stimulated response element | 3,95E-02 | RARRES3   | 1 |
| Gene Expression                              | activation       | activation of AP1 response element                      | 4,24E-02 | CD3E      | 1 |
| Gene Expression                              | activation       | activation of Nfat binding site                         | 4,54E-02 | CD3E      | 1 |
| Gene Expression                              | elongation       | elongation of RNA                                       | 4,24E-02 | TCEB2     | 1 |
| Organismal Survival                          | survival         | survival of rats                                        | 3,95E-02 | IGK@      | 1 |
| Psychological Disorders                      | psychosis        | psychosis                                               | 4,32E-02 | SST, TAC1 | 2 |

**SUPPLEMENTAL TABLE 5**

| B cell proliferation |          | T cell proliferation |                          | NK cell activation |       | Granulocyte migration |                          | Dendritic cell migration |                          | Mast cell activation |                         | Macrophage activation |       |
|----------------------|----------|----------------------|--------------------------|--------------------|-------|-----------------------|--------------------------|--------------------------|--------------------------|----------------------|-------------------------|-----------------------|-------|
| 200675_at            | CD81     | 200675_at            | CD81                     | 200983_x_at        | CD59  | 1405_i_at             | CCL5                     | 1405_i_at                | CCL5                     | 1405_i_at            | CCL5                    | 1405_i_at             | CCL5  |
| 201887_at            | IL13RA1  | 200679_x_at          | HMGB1 (includes EG:3146) | 200984_s_at        | CD59  | 200602_at             | APP                      | 200027_at                | NARS                     | 204655_at            | CCL5                    | 200806_s_at           | HSPD1 |
| 201888_s_at          | IL13RA1  | 200680_x_at          | HMGB1 (includes EG:3146) | 200985_s_at        | CD59  | 200679_x_at           | HMGB1 (includes EG:3146) | 200679_x_at              | HMGB1 (includes EG:3146) | 205114_s_at          | CCL3                    | 200807_s_at           | HSPD1 |
| 202265_at            | BMI1     | 200806_s_at          | HSPD1                    | 201008_s_at        | TXNIP | 200680_x_at           | HMGB1 (includes EG:3146) | 200680_x_at              | HMGB1 (includes EG:3146) | 205500_at            | C5                      | 201107_s_at           | THBS1 |
| 202284_s_at          | CDKN1A   | 200807_s_at          | HSPD1                    | 201009_s_at        | TXNIP | 202648_at             | RPS19                    | 200813_s_at              | PAFAH1B1                 | 205629_s_at          | CRH                     | 201108_s_at           | THBS1 |
| 202315_s_at          | BCR      | 200983_x_at          | CD59                     | 201010_s_at        | TXNIP | 202649_x_at           | RPS19                    | 200815_s_at              | PAFAH1B1                 | 205630_at            | CRH                     | 201109_s_at           | THBS1 |
| 202431_s_at          | MYC      | 200984_s_at          | CD59                     | 202803_s_at        | ITGB2 | 202833_s_at           | SERPINA1                 | 200816_s_at              | PAFAH1B1                 | 205754_at            | F2                      | 201110_s_at           | THBS1 |
| 202833_s_at          | SERPINA1 | 200985_s_at          | CD59                     | 203547_at          | CD4   | 202834_at             | AGT                      | 202042_at                | HARS                     | 206001_at            | NPY                     | 202018_s_at           | LTF   |
| 203140_at            | BCL6     | 201107_s_at          | THBS1                    | 202859_x_at        | TYRO  | 202834_at             | IL8                      | 202834_at                | AGT                      | 206407_s_at          | CCL13                   | 202637_s_at           | ICAM1 |
| 203233_at            | IL4R     | 201108_s_at          | THBS1                    | 202917_s_at        | STAT5 | 202917_s_at           | S100A8                   | 203666_at                | CXCL12                   | 206552_s_at          | TAC1                    | 202638_s_at           | ICAM1 |
| 203528_at            | SEMA4D   | 201109_s_at          | THBS1                    | 205026_at          | B     | 203084_at             | TGFB1                    | 203915_at                | CXCL9                    | 207029_at            | KITLG                   | 202728_s_at           | LTBP1 |
| 203547_at            | CD4      | 201110_s_at          | THBS1                    | 205263_at          | BCL10 | 203085_s_at           | TGFB1                    | 204103_at                | CCL4                     | 207113_s_at          | TNF                     | 202729_s_at           | LTBP1 |
| 203666_at            | CXCL12   | 201265_at            | FTL                      | 205291_at          | IL2RB | 203233_at             | IL4R                     | 204450_x_at              | APOA1                    | 207433_at            | IL10                    | 202859_x_at           | IL8   |
| 204562_at            | IRF4     | 201328_at            | ETS2                     | 205546_s_at        | TYK2  | 203236_s_at           | LGALS9                   | 204533_at                | CXCL10                   | 207538_at            | IL4                     | 203547_at             | CD4   |
| 204639_at            | ADA      | 201329_s_at          | ETS2                     | 205789_at          | CD1D  | 203535_at             | S100A9                   | 204606_at                | CCL21                    | 207539_s_at          | IL4                     | 203948_s_at           | MPO   |
| 204780_s_at          | FAS      | 201331_s_at          | STAT6                    | 205821_at          | KLRK1 | 203687_at             | CX3CL1                   | 204655_at                | CCL5                     | 207906_at            | IL3                     | 203949_at             | MPO   |
| 204781_s_at          | FAS      | 201332_s_at          | STAT6                    | 205992_s_at        | IL15  | 206001_at             | NPY                      | 205067_at                | IL1B                     | 208850_s_at          | THY1                    | 204103_at             | CCL4  |
| 204923_at            | SASH3    | 201695_s_at          | NP                       | 206005_x_at        | SPN   | 206056_x_at           | SPN                      | 205114_s_at              | CCL3                     | 208851_s_at          | THY1                    | 204655_at             | CCL5  |
| 205153_s_at          | CD40     | 206057_x_at          | SPN                      | 206057_x_at        | SPN   | 204035_at             | SCG2                     | 205153_s_at              | CD40                     | 210354_at            | IFNG                    | 204748_at             | PTGS2 |
| 205207_at            | IL6      | 201746_at            | TP53                     | 206118_at          | STAT4 | 204470_at             | CXCL1                    | 205242_at                | CXCL13                   | 211124_s_at          | KITLG                   | 204965_at             | GC    |
| 205312_at            | SPI1     | 202431_s_at          | MYC                      | 206295_at          | IL18  | 204533_at             | CXCL10                   | 205476_at                | CCL20                    | 211743_s_at          | PRG2 (includes EG:5553) | 205067_at             | IL1B  |
| 205385_at            | MDM2     | 202637_s_at          | ICAM1                    | 206295_at          | IL18  | 204534_at             | VTN                      | 206295_at                | IL18                     | 213869_x_at          | THY1                    | 205114_s_at           | CCL3  |
| 205386_s_at          | MDM2     | 202638_s_at          | ICAM1                    | 206545_at          | CD28  | 204563_at             | SELL                     | 206337_at                | CCR7                     | 214627_at            | EPX                     | 205153_s_at           | CD40  |
| 205456_at            | CD3E     | 202668_at            | EFNB2                    | 206618_at          | 1     | 204606_at             | CCL21                    | 206576_s_at              | CEACAM1                  | 216714_at            | CCL13                   | 205207_at             | IL6   |
| 205504_at            | BTK      | 202669_s_at          | EFNB2                    | 206890_at          | B1    | 204606_at             | CCL21                    | 207113_s_at              | TNF                      | 217767_at            | C3                      | 205377_s_at           | ACHE  |
| 205685_at            | CD86     | 202687_s_at          | TNFSF10                  | 207160_at          | IL12A | 204655_at             | CCL5                     | 207113_s_at              | TNF                      | 217767_at            | C3                      | 205378_s_at           | ACHE  |
| 205686_s_at          | CD86     | 202688_at            | TNFSF10                  | 207315_at          | CD226 | 205067_at             | IL1B                     | 207433_at                | IL10                     | 226534_at            | KITLG                   | 205378_s_at           | ACHE  |
| 205692_s_at          | CD38     | 202711_at            | EFNB1                    | 207375_s_at        | IL15R | 205114_s_at           | CCL3                     | 207652_s_at              | CMKLR1                   | 1555759_a_at         | CCL5                    | 205753_at             | CRP   |
| 205758_at            | CD8A     | 202803_s_at          | ITGB2                    | 207536_s_at        | TNFRS | 205118_at             | FPR1                     | 207681_at                | CXCR3                    |                      |                         | 206295_at             | IL18  |
|                      |          | 202779_s_at          | ITGB2                    | 207795_s_at        | F9    | 205119_s_at           | FPR1                     | 207861_at                | CCL22                    |                      |                         | 206350_at             | APCS  |
|                      |          | 203010_at            | STAT5A                   | at                 | KLRD1 | at                    | FPR1                     |                          |                          |                      |                         |                       |       |

|             |         |             |          |             |       |             |                          |              |                          |             |                          |
|-------------|---------|-------------|----------|-------------|-------|-------------|--------------------------|--------------|--------------------------|-------------|--------------------------|
| 205798_at   | IL7R    | 203065_s_at | CAV1     | 207796_x_at | KLRD1 | 205291_at   | IL2RB                    | 207892_at    | CD40LG                   | 206363_at   | MAF                      |
| 205861_at   | SPIB    | 203084_at   | TGFB1    | 207849_at   | IL2   | 205481_at   | ADORA1                   | 207901_at    | IL12B                    | 206552_s_at | TAC1                     |
| 205992_s_at | IL15    | 203085_s_at | TGFB1    | 207860_at   | NCR1  | 205500_at   | C5                       | 208075_s_at  | CCL7                     | 206758_at   | EDN2                     |
| 206181_at   | SLAMF1  | 203315_at   | NCK2     | 207901_at   | IL12B | 205653_at   | CTSG                     | 209496_at    | RARRES2                  | 206975_at   | LTA                      |
| 206206_at   | CD180   | 203381_s_at | APOE     | 207989_at   | OPRM  | 205901_at   | PNOC                     | 209498_at    | CEACAM1                  | 207082_at   | CSF1                     |
| 206508_at   | CD70    | 203382_s_at | APOE     | 207994_s_at | OPRM  | 205916_at   | S100A7                   | 209687_at    | CXCL12                   | 207092_at   | LEP                      |
| 206633_at   | CHRNA1  | 203508_at   | TNFRSF1B | 208309_s_at | MALT  | 206056_x_at | SPN                      | 209827_s_at  | IL16                     | 207113_s_at | TNF                      |
| 206635_at   | CHRN2   | 203666_at   | CXCL12   | 209124_at   | MYD8  | 206057_x_at | SPN                      | 209828_s_at  | IL16                     | 207257_at   | EPO                      |
| 206665_s_at | BCL2L1  | 203684_s_at | BCL2     | 210017_at   | MALT  | 206295_at   | IL18                     | 209875_s_at  | SPP1                     | 207388_s_at | PTGES                    |
| 206693_at   | IL7     | 203685_at   | BCL2     | 210018_x_at | MALT  | 206336_at   | CXCL6                    | 210072_at    | CCL19                    | 207433_at   | IL10                     |
| 207029_at   | KITLG   | 203868_s_at | VCAM1    | 210354_at   | IFNG  | 206365_at   | XCL1                     | 210610_at    | CEACAM1                  | 207538_at   | IL4                      |
| 207113_s_at | TNF     | 203939_at   | NT5E     | 210606_x_at | KLRD1 | 206366_x_at | XCL1                     | 210659_at    | CMKLR1                   | 207539_s_at | IL4                      |
| 207238_s_at | PTPRC   | 204116_at   | IL2RG    | 210763_x_at | NCR3  | 206367_at   | REN                      | 211338_at    | IFNA2                    | 207849_at   | IL2                      |
| 207433_at   | IL10    | 204393_s_at | ACPP     | 210865_at   | FASLG | 206390_x_at | PF4                      | 211547_s_at  | PAFAH1B1                 | 207906_at   | IL3                      |
| 207538_at   | IL4     | 204489_s_at | CD44     | 211010_s_at | NCR3  | 206407_s_at | CCL13                    | 211883_x_at  | CEACAM1                  | 208018_s_at | HCK                      |
| 207539_s_at | IL4     | 204490_s_at | CD44     | 211333_s_at | FASLG | 206429_at   | F2RL1                    | 211889_x_at  | CEACAM1                  | 208075_s_at | CCL7                     |
| 207844_at   | IL13    | 204625_s_at | ITGB3    | 211359_s_at | OPRM  | 206545_at   | CD28                     | 214938_x_at  | HMGB1 (includes EG:3146) | 208169_s_at | PTGER3                   |
| 207849_at   | IL2     | 204626_s_at | ITGB3    | 211567_at   | SPN   | 206552_s_at | TAC1                     | 215346_at    | CD40                     | 208402_at   | IL17A (includes EG:3605) |
| 207892_at   | CD40LG  | 204627_s_at | ITGB3    | 211583_x_at | NCR3  | 206923_at   | PRKCA                    | 216508_x_at  | HMGB1 (includes EG:3146) | 208429_x_at | HNFA4                    |
| 207906_at   | IL3     | 204628_s_at | ITGB3    | 211786_at   | TNFRS | 207082_at   | CSF1                     | 217073_x_at  | APOA1                    | 209347_s_at | MAF                      |
| 207952_at   | IL5     | 204718_at   | EPHB6    | 211856_x_at | CD28  | 207113_s_at | TNF                      | 217119_s_at  | CXCR3                    | 209348_s_at | MAF                      |
| 208018_s_at | HCK     | 204725_s_at | NCK1     | 211861_x_at | CD28  | 207334_s_at | TGFB2                    | 222292_at    | CD40                     | 209540_at   | IGF1                     |
| 208315_x_at | TRAF3   | 204780_s_at | FAS      | 212463_at   | CD59  | 207356_at   | DEFB4 (includes EG:1673) | 35150_at     | CD40                     | 209541_at   | IGF1                     |
| 208536_s_at | BCL2L11 | 204781_s_at | FAS      | 212549_at   | STAT5 | 207419_s_at | RAC2                     | 39402_at     | IL1B                     | 209542_x_at | IGF1                     |
| 208864_s_at | TXN     | 204785_x_at | IFNAR2   | 212550_at   | STAT5 | 207463_x_at | PRSS3 (includes EG:5646) | 224731_at    | HMGB1 (includes EG:3146) | 209716_at   | CSF1                     |
| 209374_s_at | IGHM    | 204786_s_at | IFNAR2   | 213475_s_at | B     | 207467_x_at | CAST                     | 224734_at    | HMGB1 (includes EG:3146) | 209977_at   | PLG                      |
| 209499_x_at | TNFSF13 | 204863_s_at | IL6ST    | 214617_at   | ITGAL | 207849_at   | IL2                      | 226960_at    | CXCL17                   | 210168_at   | C6                       |
| 209500_x_at | TNFSF13 | 204864_s_at | IL6ST    | 216424_at   | PRF1  | 207850_at   | IL2                      | 229121_at    | CMKLR1                   | 210228_at   | CSF2                     |
| 209687_at   | CXCL12  | 204890_s_at | LCK      | 216980_s_at | CD4   | 207852_at   | CXCL3                    | 231694_at    | APOA1                    | 210229_s_at | CSF2                     |
| 209995_s_at | TCL1A   | 204891_s_at | LCK      | 216981_x_at | SPN   | 207906_at   | IL3                      | 1555016_at   | IL16                     | 210354_at   | IFNG                     |
| 210314_x_at | TNFSF13 | 204923_at   | SASH3    | 217045_x_at | SPN   | 207952_at   | IL5                      | 1555759_a_at | CCL5                     | 210367_s_at | PTGES                    |

|             |                            |             |           |              |         |             |          |              |      |             |                          |
|-------------|----------------------------|-------------|-----------|--------------|---------|-------------|----------|--------------|------|-------------|--------------------------|
| 210354_at   | IFNG                       | 204924_at   | TLR2      | 217088_s_at  | NCR1    | 208193_at   | IL9      | 1568574_x_at | SPP1 | 210374_x_at | PTGER3                   |
| 210889_s_at | FCGR2B                     | 204926_at   | INHBA     | 217095_x_at  | NCR1    | 208200_at   | IL1A     |              |      | 210375_at   | PTGER3                   |
| 210895_s_at | CD86                       | 205026_at   | STAT5B    | 217181_at    | IL2     | 208640_at   | RAC1     |              |      | 210422_x_at | SLC11A1                  |
| 210904_s_at | IL13RA1                    | 205067_at   | IL1B      | 217371_s_at  | IL15    | 208641_s_at | RAC1     |              |      | 210423_s_at | SLC11A1                  |
| 211039_at   | CHRNA1                     | 205159_at   | CSF2RB    | 217372_at    | IL15    | 208908_s_at | CAST     |              |      | 210495_x_at | FN1                      |
| 211124_s_at | KITLG                      | 205173_x_at | CD58      | 217493_x_at  | NCR2    | 208944_at   | TGFBR2   |              |      | 210557_x_at | CSF1                     |
| 211428_at   | SERPINA1                   | 205207_at   | IL6       | 219618_at    | IRAK4   | 209716_at   | CSF1     |              |      | 210831_s_at | PTGER3                   |
| 211429_s_at | SERPINA1                   | 205254_x_at | TCF7      | 220307_at    | CD244   | 209774_x_at | CXCL2    |              |      | 210832_x_at | PTGER3                   |
| 211430_s_at | IGHM                       | 205255_x_at | TCF7      | 220646_s_at  | KLRF1   | 209821_at   | IL33     |              |      | 210833_at   | PTGER3                   |
| 211495_x_at | TNFSF13                    | 205278_at   | GAD1      | 221074_at    | NCR2    | 209875_s_at | SPP1     |              |      | 210834_s_at | PTGER3                   |
| 211612_s_at | IL13RA1                    | 205291_at   | IL2RB     | 221075_s_at  | NCR2    | 210118_s_at | IL1A     |              |      | 211265_at   | PTGER3                   |
| 211635_x_at | IGHM                       | 205292_s_at | HNRNPA2B1 | 223514_at    | CARD11  | 210133_at   | CCL11    |              |      | 211506_s_at | IL8                      |
| 211636_at   | IGHM                       | 205400_at   | WAS       | 228748_at    | CD59    | 210228_at   | CSF2     |              |      | 211577_s_at | IGF1                     |
| 211637_x_at | IGHM                       | 205456_at   | CD3E      | 234320_at    | CD244   | 210229_s_at | CSF2     |              |      | 211652_s_at | LBP                      |
| 211638_at   | IGHM                       | 205595_at   | DSG3      | 236988_x_at  | ITGB2   | 210244_at   | CAMP     |              |      | 211719_x_at | FN1                      |
| 211639_x_at | IGHM                       | 205685_at   | CD86      | 239522_at    | IL12R   | 210354_at   | IFNG     |              |      | 211839_s_at | CSF1                     |
| 211646_at   | IGHM                       | 205686_s_at | CD86      | 1552497_a_at | SLAMF6  | 210390_s_at | CCL15    |              |      | 211909_x_at | PTGER3                   |
| 211649_x_at | IGHM                       | 205720_at   | POMC      | 1552584_a_at | IL12RB1 | 210548_at   | CCL23    |              |      | 212464_s_at | FN1                      |
| 211650_x_at | IGHM                       | 205733_at   | BLM       | 1553681_a_at | PRF1    | 210549_s_at | CCL23    |              |      | 213933_at   | PTGER3                   |
| 211832_s_at | MDM2                       | 205783_at   | KLK13     | 1554240_a_at | ITGAL   | 210557_x_at | CSF1     |              |      | 214461_at   | LBP                      |
| 211835_at   | IGHM                       | 205798_at   | IL7R      | 1555086_at   | STAT5B  | 210845_s_at | PLAUR    |              |      | 214701_s_at | FN1                      |
| 211868_x_at | IGHM                       | 205821_at   | KLRK1     | 1555088_x_at | STAT5B  | 210865_at   | FASLG    |              |      | 214702_at   | FN1                      |
| 212300_at   | TXLNA (includes EG:200081) | 205831_at   | CD2       | 1555349_a_at | ITGB2   | 211277_x_at | APP      |              |      | 214832_at   | HNF4A                    |
| 212312_at   | BCL2L1                     | 205880_at   | PRKD1     | 1555691_a_at | KLRK1   | 211333_s_at | FASLG    |              |      | 214851_at   | HNF4A                    |
| 212587_s_at | PTPRC                      | 205904_at   | MICA      | 1557257_at   | BCL10   | 211428_at   | SERPINA1 |              |      | 215346_at   | CD40                     |
| 212588_at   | PTPRC                      | 205905_s_at | MICA      | 1557258_a_at | BCL10   | 211429_s_at | SERPINA1 |              |      | 215485_s_at | ICAM1                    |
| 212827_at   | IGHM                       | 205963_s_at | DNAJA3    | 1562368_at   | CARD11  | 211506_s_at | IL8      |              |      | 215775_at   | THBS1                    |
| 213191_at   | TICAM1                     | 205989_s_at | MOG       | 1568964_x_at | SPN     | 211567_at   | SPN      |              |      | 216424_at   | CD4                      |
| 214669_x_at | IGKC                       | 205992_s_at | IL15      |              |         | 211839_s_at | CSF1     |              |      | 216442_x_at | FN1                      |
| 214836_x_at | IGKC                       | 206056_x_at | SPN       |              |         | 211856_x_at | CD28     |              |      | 216598_s_at | CCL2                     |
| 215037_s_at | BCL2L1                     | 206057_x_at | SPN       |              |         | 211861_x_at | CD28     |              |      | 216876_s_at | IL17A (includes EG:3605) |

|             |       |             |                           |             |                          |              |         |
|-------------|-------|-------------|---------------------------|-------------|--------------------------|--------------|---------|
| 215346_at   | CD40  | 206067_s_at | WT1                       | 211924_s_at | PLAUR                    | 216889_s_at  | HNFB4   |
| 215719_x_at | FAS   | 206115_at   | EGR3                      | 212048_s_at | YARS                     | 217181_at    | IL2     |
| 215925_s_at | CD72  | 206125_s_at | KLK8                      | 212586_at   | CAST                     | 217254_s_at  | EPO     |
| 215990_s_at | BCL6  | 206219_s_at | VAV1                      | 213093_at   | PRKCA                    | 217473_x_at  | SLC11A1 |
| 216207_x_at | IGKC  | 206281_at   | ADCYAP1                   | 213414_s_at | RPS19                    | 217507_at    | SLC11A1 |
| 216252_x_at | FAS   | 206295_at   | IL18                      | 213421_x_at | PRSS3 (includes EG:5646) | 217871_s_at  | MIF     |
| 216424_at   | CD4   | 206341_at   | IL2RA                     | 213506_at   | F2RL1                    | 218995_s_at  | EDN1    |
| 216491_x_at | IGHM  | 206365_at   | XCL1                      | 213603_s_at | RAC2                     | 221271_at    | IL21    |
| 216510_x_at | IGHM  | 206366_x_at | XCL1                      | 214146_s_at | PPBP                     | 221323_at    | ULBP1   |
| 216517_at   | IGKC  | 206407_s_at | CCL13                     | 214370_at   | S100A8                   | 222292_at    | CD40    |
| 216557_x_at | IGHM  | 206467_x_at | TNFRSF6B                  | 214567_s_at | XCL1                     | 35150_at     | CD40    |
| 216558_x_at | IGHM  | 206488_s_at | CD36                      | 214575_s_at | AZU1                     | 37020_at     | CRP     |
| 216609_at   | TXN   | 206493_at   | ITGA2B (includes EG:3674) | 214637_at   | OSM                      | 39402_at     | IL1B    |
| 216705_s_at | ADA   | 206494_s_at | ITGA2B (includes EG:3674) | 214866_at   | PLAUR                    | 222802_at    | EDN1    |
| 216706_x_at | IGHM  | 206545_at   | CD28                      | 214938_x_at | HMGB1 (includes EG:3146) | 229327_s_at  | MAF     |
| 216829_at   | IGKC  | 206577_at   | VIP                       | 214953_s_at | APP                      | 230382_at    | SLC11A1 |
| 216986_s_at | IRF4  | 206589_at   | GFI1                      | 214974_x_at | CXCL5                    | 230914_at    | HNFB4   |
| 216987_at   | IRF4  | 206633_at   | CHRNA1                    | 215101_s_at | CXCL5                    | 235086_at    | THBS1   |
| 217084_at   | IGHM  | 206665_s_at | BCL2L1                    | 215194_at   | PRKCA                    | 239336_at    | THBS1   |
| 217181_at   | IL2   | 206669_at   | GAD1                      | 215195_at   | PRKCA                    | 240033_at    | PLG     |
| 217217_at   | IGHM  | 206670_s_at | GAD1                      | 216220_s_at | ADORA1                   | 241716_at    | HSPD1   |
| 217223_s_at | BCR   | 206693_at   | IL7                       | 216508_x_at | HMGB1 (includes EG:3146) | 243372_at    | HSPD1   |
| 217236_x_at | IGHM  | 206780_at   | GAD2                      | 216598_s_at | CCL2                     | 243621_at    | SPACA3  |
| 217281_x_at | IGHM  | 206907_at   | TNFSF9                    | 216714_at   | CCL13                    | 243845_at    | HSPD1   |
| 217360_x_at | IGHM  | 207004_at   | BCL2                      | 216980_s_at | SPN                      | 243977_at    | IL6     |
| 217371_s_at | IL15  | 207005_s_at | BCL2                      | 216981_x_at | SPN                      | 1554997_a_at | PTGS2   |
| 217372_at   | IL15  | 207052_at   | HAVCR1                    | 217181_at   | IL2                      | 1555116_s_at | SLC11A1 |
| 217373_x_at | MDM2  | 207085_x_at | CSF2RA (includes EG:1438) | 218002_s_at | CXCL14                   | 1555759_a_at | CCL5    |
| 217542_at   | MDM2  | 207092_at   | LEP                       | 220971_at   | IL25                     | 1556316_s_at | MIF     |
| 217871_s_at | MIF   | 207104_x_at | LILRB1                    | 221463_at   | CCL24                    | 1558199_at   | FN1     |
| 219500_at   | CLCF1 | 207113_s_at | TNF                       | 39402_at    | IL1B                     | 1564630_at   | EDN1    |

|             |          |             |                           |              |                           |              |     |
|-------------|----------|-------------|---------------------------|--------------|---------------------------|--------------|-----|
| 220307_at   | CD244    | 207160_at   | IL12A                     | 823_at       | CX3CL1                    | 1566323_at   | MAF |
| 220567_at   | IKZF2    | 207176_s_at | CD80                      | 222484_s_at  | CXCL14                    | 1566324_a_at | MAF |
| 221271_at   | IL21     | 207187_at   | JAK3                      | 223278_at    | GJB2                      |              |     |
| 221351_at   | HTR1A    | 207199_at   | TERT                      | 223710_at    | CCL26 (includes EG:10344) |              |     |
| 221571_at   | TRAF3    | 207238_s_at | PTPRC                     | 224731_at    | HMGB1 (includes EG:3146)  |              |     |
| 222292_at   | CD40     | 207277_at   | CD209 (includes EG:30835) | 224734_at    | HMGB1 (includes EG:3146)  |              |     |
| 222343_at   | BCL2L11  | 207278_s_at | CD209 (includes EG:30835) | 230101_at    | CXCL2                     |              |     |
| 35150_at    | CD40     | 207323_s_at | MBP                       | 230170_at    | OSM                       |              |     |
| 39318_at    | TCL1A    | 207426_s_at | TNFSF4                    | 230318_at    | SERPINA1                  |              |     |
| 223501_at   | TNFSF13B | 207433_at   | IL10                      | 232170_at    | S100A7A                   |              |     |
| 223502_s_at | TNFSF13B | 207526_s_at | IL1RL1                    | 232220_at    | S100A7A                   |              |     |
| 223514_at   | CARD11   | 207536_s_at | TNFRSF9                   | 237038_at    | CXCL14                    |              |     |
| 223903_at   | TLR9     | 207538_at   | IL4                       | 238760_at    | YARS                      |              |     |
| 225160_x_at | MDM2     | 207539_s_at | IL4                       | 242451_x_at  | RPS19                     |              |     |
| 225606_at   | BCL2L11  | 207540_s_at | SYK                       | 242743_at    | IL4R                      |              |     |
| 226218_at   | IL7R     | 207549_x_at | CD46                      | 243669_s_at  | PRAP1                     |              |     |
| 226534_at   | KITLG    | 207586_at   | SHH                       | 1555759_a_at | CCL5                      |              |     |
| 226602_s_at | BCR      | 207795_s_at | KLRD1                     | 1560074_x_at | PRKCA                     |              |     |
| 228518_at   | IGHM     | 207796_x_at | KLRD1                     | 1564010_x_at | CAST                      |              |     |
| 228758_at   | BCL6     | 207817_at   | IFNW1                     | 1567457_x_at | RAC1                      |              |     |
| 228891_at   | SEMA4D   | 207840_at   | CD160                     | 1567458_s_at | RAC1                      |              |     |
| 229326_at   | TNFSF13  | 207849_at   | IL2                       | 1568574_x_at | SPP1                      |              |     |
| 229711_s_at | MDM2     | 207892_at   | CD40LG                    | 1568964_x_at | SPN                       |              |     |
| 230318_at   | SERPINA1 | 207901_at   | IL12B                     | 1569203_x_at | CXCL2                     |              |     |
| 231228_at   | BCL2L1   | 207907_at   | TNFSF14                   |              |                           |              |     |
| 231929_at   | IKZF2    | 208023_at   | TNFRSF4                   |              |                           |              |     |
| 232739_at   | SPIB     | 208173_at   | IFNB1                     |              |                           |              |     |
| 234320_at   | CD244    | 208193_at   | IL9                       |              |                           |              |     |
| 235737_at   | TSLP     | 208200_at   | IL1A                      |              |                           |              |     |
| 237522_at   | FAS      | 208308_s_at | GPI                       |              |                           |              |     |
| 237891_at   | MDM2     | 208324_at   | AKAP13                    |              |                           |              |     |
| 241389_at   | CHRN2    | 208325_s_at | AKAP13                    |              |                           |              |     |
| 242743_at   | IL4R     | 208402_at   | IL17A (includes EG:3605)  |              |                           |              |     |

|              |                            |             |         |
|--------------|----------------------------|-------------|---------|
| 243977_at    | IL6                        | 208478_s_at | BAX     |
| 244089_at    | MYC                        | 208485_x_at | CFLAR   |
| 244616_x_at  | MDM2                       | 208650_s_at | CD24    |
| 1552480_s_at | PTPRC                      | 208651_x_at | CD24    |
| 1552892_at   | TNFRSF13C                  | 208783_s_at | CD46    |
| 1553088_a_at | BCL2L11                    | 208864_s_at | TXN     |
| 1553094_at   | TAC4                       | 208991_at   | STAT3   |
| 1553096_s_at | BCL2L11                    | 208992_s_at | STAT3   |
| 1555060_a_at | IKZF2                      | 209072_at   | MBP     |
| 1555186_at   | CDKN1A                     | 209083_at   | CORO1A  |
| 1555372_at   | BCL2L11                    | 209269_s_at | SYK     |
| 1555626_a_at | SLAMF1                     | 209374_s_at | IGHM    |
| 1556316_s_at | MIF                        | 209499_x_at | TNFSF13 |
| 1558143_a_at | BCL2L11                    | 209500_x_at | TNFSF13 |
| 1561358_at   | TXLNA (includes EG:200081) | 209508_x_at | CFLAR   |
| 1561937_x_at | IGHM                       | 209534_x_at | AKAP13  |
| 1562368_at   | CARD11                     | 209535_s_at | AKAP13  |
| 1569830_at   | PTPRC                      | 209554_at   | CD36    |
|              |                            | 209555_s_at | CD36    |
|              |                            | 209602_s_at | GATA3   |
|              |                            | 209603_at   | GATA3   |
|              |                            | 209604_s_at | GATA3   |
|              |                            | 209687_at   | CXCL12  |
|              |                            | 209771_x_at | CD24    |
|              |                            | 209772_s_at | CD24    |
|              |                            | 209835_x_at | CD44    |
|              |                            | 209875_s_at | SPP1    |
|              |                            | 209939_x_at | CFLAR   |
|              |                            | 210031_at   | CD247   |
|              |                            | 210038_at   | PRKCQ   |
|              |                            | 210039_s_at | PRKCQ   |
|              |                            | 210105_s_at | FYN     |

|             |                           |
|-------------|---------------------------|
| 210118_s_at | IL1A                      |
| 210136_at   | MBP                       |
| 210198_s_at | PLP1                      |
| 210228_at   | CSF2                      |
| 210229_s_at | CSF2                      |
| 210314_x_at | TNFSF13                   |
| 210318_at   | RBP3                      |
| 210340_s_at | CSF2RA (includes EG:1438) |
| 210342_s_at | TPO                       |
| 210354_at   | IFNG                      |
| 210439_at   | ICOS                      |
| 210442_at   | IL1RL1                    |
| 210495_x_at | FN1                       |
| 210511_s_at | INHBA                     |
| 210563_x_at | CFLAR                     |
| 210564_x_at | CFLAR                     |
| 210606_x_at | KLRD1                     |
| 210848_at   | GPI                       |
| 210865_at   | FASLG                     |
| 210895_s_at | CD86                      |
| 210916_s_at | CD44                      |
| 211000_s_at | IL6ST                     |
| 211039_at   | CHRNA1                    |
| 211063_s_at | NCK1                      |
| 211075_s_at | CD47                      |
| 211108_s_at | JAK3                      |
| 211109_at   | JAK3                      |
| 211197_s_at | ICOSLG                    |
| 211198_s_at | ICOSLG                    |
| 211199_s_at | ICOSLG                    |
| 211264_at   | GAD2                      |
| 211269_s_at | IL2RA                     |
| 211286_x    | CSF2RA (includes EG:1438) |



|           |                           |
|-----------|---------------------------|
| _at       |                           |
| 211287_x  |                           |
| _at       | CSF2RA (includes EG:1438) |
| 211300_s_ |                           |
| at        | TP53                      |
| 211316_x  |                           |
| _at       | CFLAR                     |
| 211317_s_ |                           |
| at        | CFLAR                     |
| 211333_s_ |                           |
| at        | FASLG                     |
| 211336_x  |                           |
| _at       | LILRB1                    |
| 211430_s_ |                           |
| at        | IGHM                      |
| 211495_x  |                           |
| _at       | TNFSF13                   |
| 211526_s_ |                           |
| at        | TNFRSF6B                  |
| 211567_at | SPN                       |
| 211574_s_ |                           |
| at        | CD46                      |
| 211579_at | ITGB3                     |
| 211635_x  |                           |
| _at       | IGHM                      |
| 211636_at | IGHM                      |
| 211637_x  |                           |
| _at       | IGHM                      |
| 211638_at | IGHM                      |
| 211639_x  |                           |
| _at       | IGHM                      |
| 211646_at | IGHM                      |
| 211649_x  |                           |
| _at       | IGHM                      |
| 211650_x  |                           |
| _at       | IGHM                      |
| 211719_x  |                           |
| _at       | FN1                       |
| 211744_s_ |                           |
| at        | CD58                      |
| 211786_at | TNFRSF9                   |
| 211833_s_ |                           |
| at        | BAX                       |
| 211835_at | IGHM                      |
| 211836_s_ |                           |
| at        | MOG                       |
| 211856_x  |                           |
| _at       | CD28                      |
| 211861_x  |                           |
| _at       | CD28                      |
| 211862_x  |                           |
| _at       | CFLAR                     |
| 211868_x  |                           |
| _at       | IGHM                      |
| 211936_at | HSPA5                     |

|                 |                         |
|-----------------|-------------------------|
| 212014_x<br>_at | CD44                    |
| 212063_at       | CD44                    |
| 212097_at       | CAV1                    |
| 212195_at       | IL6ST                   |
| 212196_at       | IL6ST                   |
| 212312_at       | BCL2L1                  |
| 212463_at       | CD59                    |
| 212464_s_<br>at | FN1                     |
| 212486_s_<br>at | FYN                     |
| 212549_at       | STAT5B                  |
| 212550_at       | STAT5B                  |
| 212587_s_<br>at | PTPRC                   |
| 212588_at       | PTPRC                   |
| 212788_x<br>_at | FTL                     |
| 212827_at       | IGHM                    |
| 212884_x<br>_at | APOE                    |
| 213055_at       | CD47                    |
| 213187_x<br>_at | FTL                     |
| 213450_s_<br>at | ICOSLG                  |
| 213475_s_<br>at | ITGAL                   |
| 213516_at       | AKAP13                  |
| 213830_at       | TRD@                    |
| 213856_at       | CD47                    |
| 213857_s_<br>at | CD47                    |
| 214032_at       | ZAP70                   |
| 214228_x<br>_at | TNFRSF4                 |
| 214329_x<br>_at | TNFSF10                 |
| 214468_at       | MYH6                    |
| 214486_x<br>_at | CFLAR                   |
| 214567_s_<br>at | XCL1                    |
| 214618_at       | CFLAR                   |
| 214636_at       | CALCB (includes EG:797) |
| 214650_x<br>_at | MOG                     |

|             |                           |
|-------------|---------------------------|
| 214701_s_at | FN1                       |
| 214702_at   | FN1                       |
| 214938_x_at | HMGB1 (includes EG:3146)  |
| 215037_s_at | BCL2L1                    |
| 215240_at   | ITGB3                     |
| 215485_s_at | ICAM1                     |
| 215719_x_at | FAS                       |
| 215775_at   | THBS1                     |
| 216033_s_at | FYN                       |
| 216056_at   | CD44                      |
| 216252_x_at | FAS                       |
| 216261_at   | ITGB3                     |
| 216322_at   | CD58                      |
| 216379_x_at | CD24                      |
| 216442_x_at | FN1                       |
| 216491_x_at | IGHM                      |
| 216508_x_at | HMGB1 (includes EG:3146)  |
| 216510_x_at | IGHM                      |
| 216557_x_at | IGHM                      |
| 216558_x_at | IGHM                      |
| 216567_at   | MBP                       |
| 216609_at   | TXN                       |
| 216651_s_at | GAD2                      |
| 216670_at   | KLK13                     |
| 216706_x_at | IGHM                      |
| 216714_at   | CCL13                     |
| 216876_s_at | IL17A (includes EG:3605)  |
| 216942_s_at | CD58                      |
| 216953_s_at | WT1                       |
| 216956_s_at | ITGA2B (includes EG:3674) |
| 216966_at   | ITGA2B (includes EG:3674) |
| 216980_s_at | SPN                       |
| 216981_x    | SPN                       |

|           |          |
|-----------|----------|
| _at       |          |
| 217084_at | IGHM     |
| 217181_at | IL2      |
| 217217_at | IGHM     |
| 217236_x  |          |
| _at       | IGHM     |
| 217281_x  |          |
| _at       | IGHM     |
| 217315_s_ |          |
| at        | KLK13    |
| 217360_x  |          |
| _at       | IGHM     |
| 217371_s_ |          |
| at        | IL15     |
| 217372_at | IL15     |
| 217523_at | CD44     |
| 217705_at | PRKD1    |
| 217871_s_ |          |
| at        | MIF      |
| 219424_at | EBI3     |
| 220049_s_ |          |
| at        | PDCD1LG2 |
| 220054_at | IL23A    |
| 220307_at | CD244    |
| 221060_s_ |          |
| at        | TLR4     |
| 221085_at | TNFSF15  |
| 221223_x  |          |
| _at       | CISH     |
| 221271_at | IL21     |
| 221331_x  |          |
| _at       | CTLA4    |
| 221351_at | HTR1A    |
| 221371_at | TNFSF18  |
| 221718_s_ |          |
| at        | AKAP13   |
| 222023_at | AKAP13   |
| 222024_s_ |          |
| at        | AKAP13   |
| 222061_at | CD58     |
| 266_s_at  | CD24     |
| 38964_r_a |          |
| t         | WAS      |
| 39402_at  | IL1B     |
| 223377_x  |          |
| _at       | CISH     |
| 223501_at | TNFSF13B |
| 223502_s_ | TNFSF13B |

at

|             |                          |
|-------------|--------------------------|
| 223514_at   | CARD11                   |
| 223834_at   | CD274                    |
| 223851_s_at | TNFRSF18                 |
| 223961_s_at | CISH                     |
| 224093_at   | IFNK                     |
| 224341_x_at | TLR4                     |
| 224399_at   | PDCD1LG2                 |
| 224553_s_at | TNFRSF18                 |
| 224731_at   | HMGB1 (includes EG:3146) |
| 224734_at   | HMGB1 (includes EG:3146) |
| 224859_at   | CD276                    |
| 224884_at   | AKAP13                   |
| 225107_at   | HNRNPA2B1                |
| 225289_at   | STAT3                    |
| 225407_at   | MBP                      |
| 225408_at   | MBP                      |
| 225932_s_at | HNRNPA2B1                |
| 226016_at   | CD47                     |
| 226068_at   | SYK                      |
| 226218_at   | IL7R                     |
| 227039_at   | AKAP13                   |
| 227060_at   | RELT                     |
| 227259_at   | CD47                     |
| 227486_at   | NT5E                     |
| 227677_at   | JAK3                     |
| 228518_at   | IGHM                     |
| 228748_at   | CD59                     |
| 228766_at   | CD36                     |
| 228938_at   | MBP                      |
| 228976_at   | ICOSLG                   |
| 229221_at   | CD44                     |
| 229326_at   | TNFSF13                  |
| 229895_s_at | NCK1                     |
| 229937_x_at | LILRB1                   |

|             |                              |
|-------------|------------------------------|
| 230031_at   | HSPA5                        |
| 230237_at   | ADCYAP1                      |
| 231228_at   | BCL2L1                       |
| 231775_at   | TNFRSF10A (includes EG:8797) |
| 231794_at   | CTLA4                        |
| 232068_s_at | TLR4                         |
| 232188_at   | AKAP13                       |
| 234066_at   | IL1RL1                       |
| 234320_at   | CD244                        |
| 234362_s_at | CTLA4                        |
| 234411_x_at | CD44                         |
| 234418_x_at | CD44                         |
| 234474_x_at | IL6ST                        |
| 234895_at   | CTLA4                        |
| 234967_at   | IL6ST                        |
| 235075_at   | DSG3                         |
| 235086_at   | THBS1                        |
| 235458_at   | HAVCR2                       |
| 235737_at   | TSLP                         |
| 236263_at   | SHH                          |
| 236324_at   | MBP                          |
| 236341_at   | CTLA4                        |
| 236988_x_at | ITGB2                        |
| 237030_at   | ACPP                         |
| 237126_at   | CD46                         |
| 237367_x_at | CFLAR                        |
| 237522_at   | FAS                          |
| 239336_at   | THBS1                        |
| 239629_at   | CFLAR                        |
| 240766_at   | IL23A                        |
| 241193_at   | ETS2                         |
| 241716_at   | HSPD1                        |
| 242197_x_at | CD36                         |
| 242809_at   | IL1RL1                       |

|              |                              |
|--------------|------------------------------|
| 242974_at    | CD47                         |
| 243213_at    | STAT3                        |
| 243265_at    | GAD2                         |
| 243372_at    | HSPD1                        |
| 243829_at    | BRAF                         |
| 243845_at    | HSPD1                        |
| 243977_at    | IL6                          |
| 244023_at    | SYK                          |
| 244089_at    | MYC                          |
| 244131_at    | HNRNPA2B1                    |
| 244413_at    | CLECL1                       |
| 1552280_at   | TIMD4                        |
| 1552319_a_at | KLK8                         |
| 1552480_s_at | PTPRC                        |
| 1552609_s_at | IL28A                        |
| 1552648_a_at | TNFRSF10A (includes EG:8797) |
| 1552798_a_at | TLR4                         |
| 1552892_at   | TNFRSF13C                    |
| 1552914_a_at | CD276                        |
| 1552915_at   | IL28A                        |
| 1552995_at   | IL27                         |
| 1553094_at   | TAC4                         |
| 1553994_at   | NT5E                         |
| 1553995_a_at | NT5E                         |
| 1554078_s_at | DNAJA3                       |
| 1554240_a_at | ITGAL                        |
| 1554285_at   | HAVCR2                       |
| 1554519_at   | CD80                         |
| 1554544_a_at | MBP                          |
| 1555086_at   | STAT5B                       |
| 1555088_x_at | STAT5B                       |
| 1555271_a_at | TERT                         |
| 1555349_at   | ITGB2                        |

|           |                           |
|-----------|---------------------------|
| a_at      |                           |
| 1555613_  |                           |
| a_at      | ZAP70                     |
| 1555628_  |                           |
| a_at      | HAVCR2                    |
| 1555629_  |                           |
| at        | HAVCR2                    |
| 1555689_  |                           |
| at        | CD80                      |
| 1555691_  |                           |
| a_at      | KLRK1                     |
| 1555729_  |                           |
| a_at      | CD209 (includes EG:30835) |
| 1555807_  |                           |
| a_at      | MOG                       |
| 1556316_s |                           |
| _at       | MIF                       |
| 1557905_s |                           |
| _at       | CD44                      |
| 1558199_  |                           |
| at        | FN1                       |
| 1559101_  |                           |
| at        | FYN                       |
| 1559583_  |                           |
| at        | CD276                     |
| 1561899_  |                           |
| at        | CLECL1                    |
| 1561937_  |                           |
| x_at      | IGHM                      |
| 1562368_  |                           |
| at        | CARD11                    |
| 1565868_  |                           |
| at        | CD44                      |
| 1568513_  |                           |
| x_at      | IL23A                     |
| 1568574_  |                           |
| x_at      | SPP1                      |
| 1568601_  |                           |
| at        | GAD2                      |
| 1568964_  |                           |
| x_at      | SPN                       |
| 1569830_  |                           |
| at        | PTPRC                     |
